# Supplementary material for: RNA-Seq Analysis of Diverse Rice Genotypes to Identify the Genes Controlling Coleoptile Growth during Submerged Germination
Source: Front Plant Sci. 2017 May 15;8:762. doi: 10.3389/fpls.2017.00762 (PMC5430036; doi:10.3389/fpls.2017.00762)
Supplement: Supplementary file 1 [file Table1.xlsx]

## Sheet: 工作表1
Table S1. Primer list
Target gene	Primer ID	Sequence (5'->3')		Product size
			Tm
LOC_Os10g40510 (LTPL144)	rt_10g40510-2_F	CATCCGACTACCAGTGTGCT	59.47	133
	rt_10g40510-2_R	TCAGAGAGTTCAGACTGCTCAC	59.44
LOC_Os01g67030	rt_01g67030_F	CAAGCTAAACGACGACGTGC	60.18	124
LOC_Os01g67030	rt_01g67030_R	CCTCACCTTGGACGACTTGT	59.61
LOC_Os11g10480 (ADH1)	rt_11g10480_F	AAGGATTGCAGGAGCGTCAA	59.96	182
LOC_Os11g10480 (ADH1)	rt_11g10480_R	TGTTGCCAGTGCATTCAACG	59.97
LOC_Os11g10510 (ADH2)	rt_11g10510_F	CGTAAACCCCAAGGACCACA	59.89	182
LOC_Os11g10510 (ADH2)	rt_11g10510_R	ACACATCATCCTTGGTCGGC	60.39
LOC_Os01g60770 (EXPA2)	rt_01g60770_F	CGTCTCCTACAGAAGGGTGC	59.83	135
LOC_Os01g60770 (EXPA2)	rt_01g60770_R	CCCTTGATCGACACGGACTG	60.46
LOC_Os02g38920 (G3PDH)	rt_02g38920_F	TGCAATCAAGGAGGAGGCTG	60.03	167
LOC_Os02g38920 (G3PDH)	rt_02g38920_R	TGTCGTACCAGGACACAAGC	59.97
LOC_Os01g11730	rt_01g11730_F	ACCCCATCCAAATGGCTACG	60.11	177
LOC_Os01g11730	rt_01g11730_R	CGCAATCGATGAAGCAGCTC	60.04
LOC_Os01g53930 (HXK6)	rt_01g53930_F	ATCAGCTACGTCGACAACCTC	59.87	162
LOC_Os01g53930 (HXK6)	rt_01g53930_R	CAGGTGAGGTGGAATGGCAA	60.25
LOC_Os03g50885 (ACT1)	rt_03g50885_F	ATGAAGATCAAGGTGGTCGC	57.97	114
LOC_Os03g50885 (ACT1)	rt_03g50885_R	GTACTCAGCCTTGGCAATCC	58.62
