# Supplementary material for: RNA-Seq Analysis of Diverse Rice Genotypes to Identify the Genes Controlling Coleoptile Growth during Submerged Germination
Source: Front Plant Sci. 2017 May 15;8:762. doi: 10.3389/fpls.2017.00762 (PMC5430036; doi:10.3389/fpls.2017.00762)
Supplement: Supplementary file 2 [file Table2.XLSX]

## Sheet: 工作表1
Table S2. RNA-Seq statistics for tweleve samples
Sample	Nipponbare (control)	Nipponbare (Treatment)	IR64 (Control)	IR64 (Treatment)	F291 (Control)	F291 (Treatment)	F274-2a (Control)	F274-2a (Treatment)	8391 (Control)	8391 (Treatment)	8753 (Control)	8753 (Treatment)
Total reads	20304581	51287314	16993143	26090133	28622992	47351211	25652143	25610790	34724739	17270885	32613814	38388558
Read length	101	101	101	101	101	101	101	101	101	101	101	101
Total base	2050762681	5180018714	1716307443	2635103433	2890922192	4782472311	2590866443	2586689790	3507198639	1744359385	3293995214	3877244358
Total reads after QT	20210707	50959969	16942947	26012269	28474046	47094105	25574527	25495417	34596916	17211550	32460412	38159303
Average length after QT	99.9	99.6	100.3	100.2	99.8	99.8	100.3	100	100.1	100.1	99.9	99.7
Total base after QT	2019919467	5077109640	1698662957	2607239327	2842136753	4698951590	2564146215	2549005484	3462753557	1723471138	3242179179	3803677351
QT=quality trim (minimun length =35bp, error probability < 0.05)
