# Supplementary material for: RNA-Seq Analysis of Diverse Rice Genotypes to Identify the Genes Controlling Coleoptile Growth during Submerged Germination
Source: Front Plant Sci. 2017 May 15;8:762. doi: 10.3389/fpls.2017.00762 (PMC5430036; doi:10.3389/fpls.2017.00762)
Supplement: Supplementary file 3 [file Table3.XLSX]

## Sheet: CLCbio
Table S3. Short reads aligment to Nipponbare MSU 7.0 assembly
Control group			Treatment group
Nipponbare	counts	fraction of total fragments	Nipponbare	counts	fraction of total fragments
counted fragments	19063565	0.93888	counted fragments	47565581	0.927434
-uniquely	18365940	0.904522	-uniquely	45669049	0.890455
-nonspecifically	697625	0.034358	-nonspecifically	1896532	0.0369786
uncounted fragments	1241016	0.06112	uncounted fragments	3721733	0.0725663
total fragments	20304581	1	total fragments	51287314	1
IR64	counts	fraction of total fragments	IR64	counts	fraction of total fragments
counted fragments	15504109	0.912374	counted fragments	23869706	0.914894
-uniquely	14916901	0.877819	-uniquely	22944107	0.879417
-nonspecifically	587208	0.0345556	-nonspecifically	936599	0.0358986
uncounted fragments	1489034	0.0876256	uncounted fragments	2220427	0.085106
total fragments	16993143	1	total fragments	26090133	1
F291	counts	fraction of total fragments	F291	counts	fraction of total fragments
counted fragments	26296878	0.918733	counted fragments	43523994	0.919174
-uniquely	25296709	0.88379	-uniquely	41984521	0.886662
-nonspecifically	1000169	0.0349429	-nonspecifically	1539473	0.0325118
uncounted fragments	2326114	0.0812673	uncounted fragments	3827217	0.0808262
total fragments	28622992	1	total fragments	47351211	1
F274-2a	counts	fraction of total fragments	F274-2a	counts	fraction of total fragments
counted fragments	23599532	0.919983	counted fragments	23580864	0.920739
-uniquely	22662915	0.883471	-uniquely	22652836	0.884504
-nonspecifically	936617	0.0365122	-nonspecifically	928028	0.0362358
uncounted fragments	2052611	0.0800171	uncounted fragments	2029926	0.0792606
total fragments	25652143	1	total fragments	25610790	1
8391	counts	fraction of total fragments	8391	counts	fraction of total fragments
counted fragments	31855671	0.917377	counted fragments	15984214	0.925501
-uniquely	30728820	0.884926	-uniquely	15416355	0.892621
-nonspecifically	1126851	0.032451	-nonspecifically	567859	0.0328796
uncounted fragments	2869068	0.0826232	uncounted fragments	1286671	0.0744994
total fragments	34724739	1	total fragments	17270885	1
8753	counts	fraction of total fragments	8753	counts	fraction of total fragments
counted fragments	30138037	0.924088	counted fragments	35566660	0.926491
-uniquely	28934441	0.887184	-uniquely	34134724	0.88919
-nonspecifically	1203596	0.0369045	-nonspecifically	1431936	0.0373011
uncounted fragments	2475777	0.0759119	uncounted fragments	2821898	0.0735088
total fragments	32613814	1	total fragments	38388558	1
