# Supplementary material for: RNA-Seq Analysis of Diverse Rice Genotypes to Identify the Genes Controlling Coleoptile Growth during Submerged Germination
Source: Front Plant Sci. 2017 May 15;8:762. doi: 10.3389/fpls.2017.00762 (PMC5430036; doi:10.3389/fpls.2017.00762)
Supplement: Supplementary file 5 [file Table5.XLSX]

## Sheet: Multifactorial testing
Table S5. Multi-factorial linear modeling to examine the effect on gene expression
	Nipponbare			IR64			8391			8753			F291			F274-2a			Average			Multifactorial linear model testing
Gene id	C	T	avg.	C	T	avg.	C	T	avg.	C	T	avg.	C	T	avg.	C	T	avg.	C	T	log2foldchange	treatment effect	genotype effect	interaction
LOC_Os01g01660	2316.11	181.907	1249.01	85.9532	18.4011	52.1771	238.358	478.686	358.522	1106.17	138.573	622.371	768.72	11.2462	389.983	116.708	140.373	128.54	772.003	161.531	-2.25679	0.00111222	0.00150676	0.00721043
LOC_Os01g03310	367.17	36.5967	201.883	7.81393	2.90543	5.35968	180.018	0	90.0092	925.143	2.94836	464.046	678.743	6.51096	342.627	273.462	22.4125	147.937	405.392	11.8957	-5.09081	8.91799e-09	0.0197269	0.0298584
LOC_Os01g03330	38.1857	808.357	423.271	21.879	199.506	110.693	58.3393	494.128	276.233	39.0637	667.066	353.065	1440.62	1422.94	1431.78	630.45	373.935	502.193	371.422	660.989	0.831564	0.000256669	3.92147e-05	0.0324773
LOC_Os01g03340	732.871	16675.7	8704.3	900.164	2479.3	1689.73	1595.16	9782.18	5688.67	1555.88	9977.98	5766.93	23210.3	20880	22045.2	14127.3	19125	16626.1	7020.28	13153.4	0.905831	7.06787e-05	1.88126e-07	0.026701
LOC_Os01g03360	88.1208	10746	5417.05	234.418	881.314	557.866	164.183	2044.45	1104.32	731.73	7325.2	4028.46	12283.9	8028.6	10156.2	7610.02	11856.2	9733.12	3518.73	6813.63	0.95337	1.89472e-06	1.63682e-11	6.49537e-05
LOC_Os01g04280	107.214	1283.58	695.395	20.3162	227.592	123.954	25.0025	318.095	171.549	380.157	480.583	430.37	5436.79	241.497	2839.14	153.322	925.991	539.656	1020.47	579.556	-0.81621	0.00121279	2.03328e-08	0.000221656
LOC_Os01g06560	7.3434	1417.05	712.195	12.5023	34.8652	23.6837	26.6694	143.606	85.1376	2.85832	172.479	87.6687	431.305	1416.43	923.867	435.937	528.464	482.2	152.769	618.815	2.01815	6.58092e-05	2.49717e-07	0.00723235
LOC_Os01g07850	2.93736	145.31	74.1239	6.25114	122.028	64.1396	2.50025	0	1.25013	81.9385	1990.14	1036.04	11.7362	26.6357	19.186	4.57677	470.663	237.62	18.3234	459.13	4.64715	1.11199e-05	5.75523e-07	0.018374
LOC_Os01g11730	1273.34	6611.63	3942.49	35.9441	2421.19	1228.57	40.0041	5767.4	2903.7	1058.53	28257.1	14657.8	37.1646	1310.48	673.821	26.3164	3642.62	1834.47	411.884	8001.73	4.28	0	1.53211e-13	0.0225538
LOC_Os01g13210	7808.97	5395.32	6602.15	2395.75	3958.16	3176.96	3031.14	9907.26	6469.2	6371.19	7112.92	6742.06	643.534	4399.63	2521.58	446.235	6353.36	3399.8	3449.47	6187.78	0.843046	0.00308991	0.0333539	0.0368058
LOC_Os01g21630	778.4	26.9093	402.655	445.394	126.87	286.132	485.049	9.26489	247.157	670.752	14.7418	342.747	11.7362	4.73524	8.23572	13.7303	27.1309	20.4306	400.844	34.9421	-3.52	0.000244632	0.00545721	0.0338081
LOC_Os01g22249	182.116	2852.93	1517.52	14.0651	565.59	289.828	36.6704	10680.9	5358.77	20.0082	5379.28	2699.64	23.4724	3233.58	1628.53	11.4419	3252.17	1631.81	47.9624	4327.41	6.49546	0	0.000498915	0.0449259
LOC_Os01g24700	11.7494	17.7602	14.7548	1.56279	5.81086	3.68682	0.833418	1965.7	983.267	1.90555	93.6104	47.758	25.4284	552.839	289.134	12.5861	248.897	130.742	9.01095	480.77	5.73752	4.87513e-07	0.000238364	0.00686608
LOC_Os01g24710	2507.04	11569.9	7038.49	240.669	1668.69	954.677	100.01	18789.2	9444.61	3853.01	12366.2	8109.58	451.843	2751.77	1601.81	694.525	5847.31	3270.92	1307.85	8832.18	2.75557	2.95184e-10	9.65781e-06	0.00492626
LOC_Os01g32460	2025.31	770.146	1397.73	89.0788	107.501	98.2899	430.044	3.0883	216.566	1097.59	268.301	682.948	35.2086	3.55143	19.38	9.15354	48.3639	28.7587	614.398	200.158	-1.61803	0.0217278	1.58025e-09	0.00233058
LOC_Os01g36294	64.6219	0	32.3109	0	0	0	0.833418	0	0.416709	354.432	0	177.216	0	0	0	0	2.35921	1.17961	69.9812	0.393202	-7.47555	0.00540304	0.000206962	0.0368834
LOC_Os01g42380	277.58	5146.14	2711.86	159.404	227.592	193.498	62.5064	1104.07	583.286	707.911	425.301	566.606	1016.16	2944.14	1980.15	241.425	2661.19	1451.31	410.831	2084.74	2.34325	9.24171e-05	0.00275283	0.0132112
LOC_Os01g50410	27.9049	1244.29	636.097	3.12557	7.74781	5.43669	9.1676	18.5298	13.8487	1003.27	925.048	964.159	1382.91	355.143	869.029	227.694	1985.28	1106.49	442.346	756.006	0.773221	0.0445624	1.43774e-13	0.00535805
LOC_Os01g50910	17.6242	783.6	400.612	25.0046	58.1086	41.5566	11.6679	40.1479	25.9079	30.4887	213.756	122.122	975.082	2814.51	1894.8	3870.8	662.939	2266.87	821.778	762.177	-0.108624	0.00414479	1.11022e-16	0.003976
LOC_Os01g51570	145.399	1218.99	682.196	15.6279	760.254	387.941	33.3367	3352.35	1692.84	151.491	4676.83	2414.16	1451.38	3500.53	2475.95	112.131	2959.63	1535.88	318.227	2744.76	3.10856	2.73115e-14	2.13913e-06	0.0269069
LOC_Os01g51980	1553.86	72.6552	813.259	703.254	214.033	458.643	353.369	9.26489	181.317	1713.09	17.6902	865.388	76.2852	5.91905	41.1021	78.9493	64.8783	71.9138	746.468	64.0735	-3.54228	3.0541e-07	0.000477429	0.0345968
LOC_Os01g52240	2160.43	390.186	1275.31	68.7626	1696.77	882.767	103.344	1476.21	789.775	433.512	2548.86	1491.18	34.2306	272.868	153.549	14.8745	871.729	443.302	469.192	1209.44	1.36609	4.19696e-07	3.00065e-06	0.00105875
LOC_Os01g53730	71.9653	3201.67	1636.82	25.0046	28.0858	26.5452	44.1712	260.961	152.566	1885.54	1907.59	1896.56	1370.2	2507.31	1938.76	713.976	5136.01	2924.99	685.143	2173.6	1.66561	0.00058182	1.07174e-11	0.014273
LOC_Os01g57968	16626.9	7280.06	11953.5	83260.5	9679.93	46470.2	261809	8421.79	135115	294272	32873.5	163573	11709.8	17213.2	14461.5	31489.3	13215.1	22352.2	116528	14780.6	-2.9789	0.000220841	0.00569949	0.0470128
LOC_Os01g60020	49.9351	2541.86	1295.9	37.5069	71.6673	54.5871	80.8416	210.004	145.423	197.224	682.545	439.885	2548.71	1730.14	2139.42	886.749	2406.4	1646.57	633.494	1273.77	1.0077	0.00427715	2.76349e-09	0.0318263
LOC_Os01g60770	3344.18	4479.33	3911.76	1047.07	5600.7	3323.88	1596.83	27867.3	14732	968.97	7463.77	4216.37	1468	2659.43	2063.72	868.442	572.109	720.275	1548.92	8107.1	2.38793	0.00052942	0.00135929	0.0192078
LOC_Os01g61080	51.4038	1956.31	1003.86	15.6279	53.2662	34.447	15.0015	49.4128	32.2071	327.754	118.671	223.213	547.689	2448.71	1498.2	152.178	1322.34	737.258	184.942	991.452	2.42247	0.000692862	4.85742e-08	0.0340788
LOC_Os01g63690	79.3087	4764.03	2421.67	92.2043	201.443	146.824	166.684	853.914	510.299	685.997	4721.06	2703.53	2682.7	6656.57	4669.63	1283.78	11319.5	6301.64	831.779	4752.75	2.51449	9.04248e-08	1.67006e-09	0.0447861
LOC_Os01g64360	5.87472	682.421	344.148	7.81393	23.2434	15.5287	17.5018	50.9569	34.2293	217.232	325.057	271.144	706.127	535.082	620.605	569.808	1630.22	1100.01	254.06	541.163	1.0909	0.017093	4.19975e-08	0.039219
LOC_Os01g64790	29.3736	2794.27	1411.82	14.0651	85.226	49.6455	27.5028	94.1931	60.8479	34.2998	126.779	80.5396	1797.59	3569.78	2683.69	1094.99	2300.23	1697.61	499.638	1495.08	1.58127	6.77922e-05	5.55112e-16	0.03342
LOC_Os01g64860	2990.23	252.41	1621.32	2276.98	972.351	1624.66	1287.63	47.8686	667.75	4163.62	78.1315	2120.88	292.427	44.9848	168.706	106.41	184.019	145.214	1852.88	263.294	-2.81503	1.22866e-06	7.63399e-05	0.00401058
LOC_Os01g65690	15701.6	13711.4	14706.5	62.5114	5011.87	2537.19	2451.92	4593.84	3522.88	5447	6760.59	6103.8	562.359	1929.02	1245.69	136.159	10341.6	5238.88	4060.27	7058.05	0.797696	4.76272e-05	1.32413e-07	2.35111e-06
LOC_Os01g67030	1.46868	2173.2	1087.33	4.68836	65.8564	35.2724	2.50025	1712.46	857.481	6.66941	1665.82	836.246	79.2193	4277.7	2178.46	1.14419	2820.44	1410.79	15.9484	2119.25	7.054	0	4.52992e-06	0.00453111
LOC_Os01g68050	1954.81	89.339	1022.08	1354.94	228.561	791.748	816.75	30.883	423.816	1807.41	20.6385	914.025	23.4724	18.3491	20.9107	16.0187	55.4415	35.7301	995.566	73.8686	-3.75248	3.73403e-05	0.000568661	0.000696887
LOC_Os01g68300	2062.03	145.31	1103.67	4186.7	613.046	2399.87	2976.14	12.3532	1494.25	655.508	4.42254	329.965	1059.19	11.2462	535.219	1985.17	333.829	1159.5	2154.12	186.701	-3.5283	8.88178e-16	2.52244e-06	0.00374506
LOC_Os01g70520	1031.01	11.3019	521.157	1594.04	491.018	1042.53	699.238	0	349.619	1879.82	4.42254	942.122	145.724	1.77572	73.75	244.857	5.89803	125.378	932.449	85.736	-3.44305	1.11022e-16	5.09801e-11	0.0041575
LOC_Os01g71474	1530.36	134.547	832.455	1100.2	312.818	706.51	644.232	13.8973	329.065	844.157	14.0047	429.081	36.1866	5.32715	20.7569	50.3445	74.3152	62.3298	700.914	92.4849	-2.92195	8.12319e-06	3.91578e-05	0.027515
LOC_Os01g71860	17.6242	813.201	415.412	0	635.321	317.66	4.16709	693.323	348.745	1.90555	0.73709	1.32132	7.82413	797.888	402.856	3.43258	1010.92	507.178	5.82558	658.565	6.82078	4.51861e-14	0.0193384	0.00490392
LOC_Os01g73250	2169.24	3477.76	2823.5	4800.88	1075.98	2938.43	1860.19	12.3532	936.271	1814.08	13.2676	913.674	1885.61	35.5143	960.564	1351.29	329.11	840.201	2313.55	823.998	-1.48939	1.28712e-09	2.02685e-07	4.72517e-06
LOC_Os02g02400	29848	354.127	15101	20052.1	6579.83	13316	19337.8	69.4867	9703.65	39775.4	65.601	19920.5	8226.09	23.6762	4124.88	3540.13	96.7277	1818.43	20129.9	1198.24	-4.07035	0	8.77076e-15	2.01977e-05
LOC_Os02g02780	19.0928	175.449	97.2709	146.902	80.3836	113.643	7.50076	1306.35	656.925	14.2916	403.188	208.74	133.01	1488.64	810.826	30.8932	182.839	106.866	58.6151	606.142	3.37031	4.4154e-06	0.0287593	0.0166415
LOC_Os02g03870	2.93736	635.061	318.999	3.12557	13.5587	8.34212	5.00051	1487.02	746.008	0.952773	417.93	209.441	17.6043	211.31	114.457	3.43258	58.9803	31.2064	5.50885	470.643	6.41674	1.58986e-10	0.0323396	0.0467035
LOC_Os02g05830	2114.9	9278.34	5696.62	662.621	8909.02	4785.82	444.212	23996.1	12220.1	736.494	42258.1	21497.3	272.866	9493.57	4883.22	168.196	17379.1	8773.67	733.215	18552.4	4.66122	0	0.0302585	0.0342551
LOC_Os02g08440	274.643	12325.6	6300.1	57.8231	354.463	206.143	118.345	537.364	327.855	4075.01	3720.83	3897.92	9894.59	13996.2	11945.4	3373.08	25076.1	14224.6	2965.58	9335.08	1.65435	8.48555e-06	0	0.00553229
LOC_Os02g11070	35.2483	7098.15	3566.7	9.37671	69.7303	39.5535	30.8365	223.902	127.369	1301.49	778.367	1039.93	1679.25	1712.38	1695.82	488.57	4207.66	2348.11	590.795	2348.36	1.99093	5.62445e-05	5.0443e-12	0.00010106
LOC_Os02g11700	1373.22	73.7316	723.473	648.556	248.899	448.727	170.851	3.0883	86.9695	401.118	20.6385	210.878	12.7142	2.95953	7.83687	8.00935	43.6454	25.8274	435.744	65.4937	-2.73405	0.000736925	6.09925e-06	0.0225872
LOC_Os02g20540	2900.64	59.7388	1480.19	5930.77	1950.51	3940.64	3344.51	18.5298	1681.52	3126.05	55.2817	1590.67	742.314	11.8381	377.076	661.343	73.1356	367.239	2784.27	361.506	-2.94521	1.11022e-16	1.54186e-11	0.00864502
LOC_Os02g20560	7695.88	262.635	3979.26	4985.29	1563.12	3274.2	2531.92	69.4867	1300.71	4654.3	73.709	2364	78.2413	3.55143	40.8963	97.2563	69.5968	83.4266	3340.48	340.35	-3.29496	2.91347e-11	5.77316e-15	0.00492972
LOC_Os02g26810	32.3109	1435.34	733.828	1.56279	88.1314	44.8471	0.833418	1457.68	729.255	81.9385	2024.05	1052.99	229.834	1285.62	757.726	13.7303	304.338	159.034	60.0349	1099.19	4.1945	5.01821e-14	3.54703e-06	0.016236
LOC_Os02g30910	16.1555	39.2877	27.7216	487.589	7.74781	247.668	15.8349	0	7.91747	63.8358	0	31.9179	40.0986	0.591905	20.3453	155.61	0	77.8051	129.854	7.93789	-4.03199	2.77982e-06	0.00238184	0.0472575
LOC_Os02g37490	52.8725	264.788	158.83	21.879	14.5272	18.2031	32.5033	52978.2	26505.4	17.1499	7989.32	4003.23	14.6702	6735.88	3375.28	13.7303	883.525	448.628	25.4675	11477.7	8.81596	0	5.40967e-08	1.40702e-11
LOC_Os02g37654	1790.32	129.703	960.012	132.837	186.916	159.876	60.8395	0	30.4198	587.861	40.5399	314.201	38.1426	0.591905	19.3673	52.6328	15.3349	33.9839	443.772	62.181	-2.83527	2.26448e-05	1.74661e-07	0.0441202
LOC_Os02g37700	4031.52	110.328	2070.93	814.211	745.727	779.969	580.893	12.3532	296.623	2041.79	15.4789	1028.64	20.5383	1.18381	10.8611	28.6048	25.9513	27.2781	1252.93	151.837	-3.04471	1.34944e-07	2.71005e-13	0.000541364
LOC_Os02g40100	4643.96	623.221	2633.59	1501.84	1164.11	1332.97	1693.51	342.801	1018.15	3305.17	325.057	1815.11	80.1973	53.8634	67.0303	61.7864	418.76	240.273	1881.08	487.968	-1.9467	0.0220249	1.67758e-05	0.00755365
LOC_Os02g40240	4485.35	67.8116	2276.58	4.68836	8.71629	6.70232	7.50076	1.54415	4.52246	1.90555	0	0.952773	40.0986	0.591905	20.3453	122.429	57.8007	90.1146	776.995	22.7441	-5.09434	0.000390017	0	0.0140942
LOC_Os02g40260	61139.6	3911.54	32525.6	34686	8580.7	21633.4	37840.5	926.489	19383.5	28723.3	589.672	14656.5	2236.72	401.312	1319.02	4280.42	1105.29	2692.86	28151.1	2585.84	-3.44449	2.60647e-12	1.7953e-07	0.0361127
LOC_Os02g41670	14.6868	3523.51	1769.1	1.56279	25.1804	13.3716	4.16709	64.8543	34.5107	230.571	1140.28	685.424	1081.69	2015.44	1548.56	52.6328	1982.92	1017.78	230.884	1458.7	2.65944	2.44771e-09	4.66294e-15	0.00680429
LOC_Os02g41954	5.87472	2976.17	1491.02	1.56279	21.3065	11.4346	8.33418	41.692	25.0131	22.8666	251.348	137.107	899.775	10071.3	5485.52	271.174	5140.72	2705.95	201.598	3083.75	3.93514	1.26477e-12	0	0.0129374
LOC_Os02g43194	1822.63	110.328	966.48	459.459	278.921	369.19	125.846	6.1766	66.0114	988.979	16.216	502.597	82.1533	1.77572	41.9645	38.9025	50.7231	44.8128	586.328	77.3568	-2.92211	1.00981e-05	9.74409e-06	0.0203517
LOC_Os02g43410	27.9049	555.409	291.657	31.2557	591.739	311.498	5.00051	55.5894	30.2949	911.804	444.465	678.135	7.82413	0	3.91206	14.8745	106.165	60.5195	166.444	292.228	0.812057	0.0132433	3.09272e-08	0.0025919
LOC_Os02g44230	399.481	3923.38	2161.43	257.86	391.265	324.562	327.533	2198.87	1263.2	3521.45	2861.38	3191.42	1533.53	9945.78	5739.66	760.888	11728.8	6244.86	1133.46	5174.92	2.19081	8.56478e-06	1.48707e-05	0.0473194
LOC_Os02g44310	13.2181	1155.49	584.353	51.5719	34.8652	43.2185	15.0015	634.645	324.823	2.85832	168.794	85.8259	1086.58	220.189	653.382	123.573	910.656	517.114	215.466	520.773	1.27319	0.000159862	2.1635e-05	0.000132754
LOC_Os02g45420	4.40604	264.25	134.328	18.7534	4.84238	11.7979	15.0015	15.4415	15.2215	28.5832	104.667	66.625	176.043	1882.85	1029.45	96.1121	2250.69	1173.4	56.4832	753.79	3.73827	0.000942494	5.12058e-08	0.00593697
LOC_Os02g47470	237.926	7312.35	3775.14	184.409	227.592	206	311.698	1205.98	758.839	3313.75	8338.7	5826.22	2924.27	5853.35	4388.81	1320.4	12901.4	7110.88	1382.07	5973.22	2.11167	2.29494e-05	3.85991e-08	0.0357725
LOC_Os02g48570	1321.81	53.8187	687.815	381.32	341.872	361.596	548.389	4.63245	276.511	677.422	3.68545	340.554	237.658	33.7386	135.698	173.917	25.9513	99.9343	556.753	77.2831	-2.84881	2.59795e-07	0.00795871	0.0135701
LOC_Os02g48900	12358.9	6745.64	9552.29	7779.55	5491.26	6635.41	6564	1845.26	4204.63	5800.48	802.691	3301.59	3868.05	423.804	2145.93	1409.64	3010.35	2210	6296.78	3053.17	-1.04431	0.00350069	0.00487613	0.0497714
LOC_Os02g51970	1.46868	1418.12	709.796	1.56279	17.4326	9.49768	6.66735	125.076	65.8717	172.452	988.437	580.445	632.776	1454.9	1043.84	99.5447	1856.7	978.122	152.412	976.779	2.68006	1.89001e-08	1.11513e-10	0.00758162
LOC_Os02g52670	4.40604	1244.29	624.347	3.12557	0.968477	2.04702	11.6679	1.54415	6.606	217.232	297.784	257.508	441.085	1711.79	1076.44	46.9119	1463.89	755.402	120.738	786.711	2.70395	0.013921	4.75496e-11	5.84763e-05
LOC_Os02g57350	2.93736	343.363	173.15	4.68836	8.71629	6.70232	5.00051	13.8973	9.44892	13.3388	86.2395	49.7892	4156.57	211.902	2184.23	10.2977	100.267	55.2821	698.805	127.397	-2.45555	0.00723691	0	0.000433053
LOC_Os03g04070	52.8725	831.499	442.186	7.81393	74.5727	41.1933	8.33418	30.883	19.6086	89.5607	105.404	97.4823	2237.7	284.706	1261.2	34.3258	730.176	382.251	405.101	342.873	-0.240606	0.00612276	1.32193e-09	0.00800074
LOC_Os03g05750	132.181	5253.24	2692.71	245.357	148.177	196.767	255.859	117.355	186.607	2261.88	3829.18	3045.53	1368.24	2410.83	1889.54	693.38	7556.56	4124.97	826.151	3219.22	1.96224	0.0258925	2.9638e-06	0.000596591
LOC_Os03g08330	284.924	8160.53	4222.73	42.1952	80.3836	61.2894	137.514	216.181	176.847	3996.88	3124.52	3560.7	6404.05	2671.86	4537.95	1974.88	14696.7	8335.79	2140.07	4825.03	1.17288	0.0255726	2.22045e-16	0.00158626
LOC_Os03g08460	679.998	13370.7	7025.36	12.5023	3563.03	1787.76	60.0061	18066.5	9063.27	385.873	28787	14586.5	80.1973	8889.82	4485.01	74.3725	30830.2	15452.3	215.492	17251.2	6.32292	0	4.35446e-06	0.0397058
LOC_Os03g08520	14.6868	2013.9	1014.29	1.56279	5.81086	3.68682	15.0015	0	7.50076	366.818	433.409	400.113	370.668	677.731	524.2	218.541	4225.35	2221.94	164.546	1226.03	2.89743	0.0126539	1.66089e-13	1.91978e-05
LOC_Os03g13300	20.5615	3925	1972.78	145.339	445.499	295.419	21.6689	1337.23	679.451	657.414	4501.41	2579.41	934.005	6002.51	3468.26	286.048	5561.84	2923.95	344.173	3628.91	3.39833	8.02802e-13	3.10359e-05	0.00336426
LOC_Os03g13840	543.411	5260.78	2902.09	234.418	328.314	281.366	345.035	348.978	347.006	1913.17	1227.99	1570.58	2546.75	6221.52	4384.13	1496.6	14446.6	7971.62	1179.9	4639.04	1.97516	0.0114888	1.01139e-07	0.0437896
LOC_Os03g14642	425.917	71.5789	248.748	268.799	61.9825	165.391	569.225	1.54415	285.384	1488.23	5.89672	747.064	4013.78	5.91905	2009.85	3492.07	141.553	1816.81	1709.67	48.079	-5.15217	1.11022e-15	0.00235872	8.73015e-05
LOC_Os03g14654	24231.7	3628.46	13930.1	2276.98	669.217	1473.1	4965.51	75.6633	2520.58	18067.4	384.024	9225.73	9803.63	53.8634	4928.75	6952.11	1734.02	4343.07	11049.6	1090.87	-3.34043	7.54952e-15	4.75032e-06	0.000177809
LOC_Os03g18130	798.961	72.1171	435.539	653.244	455.184	554.214	452.546	131.253	291.899	379.204	54.5446	216.874	3729.17	62.7419	1895.96	1675.1	41.2862	858.192	1281.37	136.188	-3.23402	1.33136e-07	0.0452303	0.0324612
LOC_Os03g19990	1279.22	1971.92	1625.57	9.37671	1087.6	548.488	353.369	4244.87	2299.12	690.761	3187.18	1938.97	649.402	1943.82	1296.61	112.131	2636.42	1374.28	515.71	2511.97	2.28419	3.7505e-08	0.0107649	0.00636641
LOC_Os03g22010	4325.26	9.68737	2167.47	6402.73	820.3	3611.52	2270.23	7.72074	1138.98	6924.76	28.0094	3476.38	318.833	2.95953	160.896	370.718	80.2132	225.466	3435.42	158.148	-4.44114	0	2.10032e-12	7.15114e-05
LOC_Os03g22620	709.372	1.61456	355.493	629.803	1.93695	315.87	229.19	4.63245	116.911	1810.27	2.21127	906.24	8.80214	4.14334	6.47274	16.0187	1.17961	8.59915	567.242	2.6197	-7.75842	4.30622e-12	0.0343048	0.00676514
LOC_Os03g25280	2.93736	8.0728	5.50508	4.68836	13.5587	9.12352	4.16709	3536.1	1770.13	1.90555	850.602	426.254	15.6483	2445.16	1230.4	0	66.0579	33.029	4.8911	1153.26	7.88134	1.94289e-14	1.31725e-07	0.000339311
LOC_Os03g29150	405.355	51.1278	228.242	415.701	101.69	258.696	45.0046	0	22.5023	279.163	0	139.581	4.89008	3.55143	4.22075	8.00935	73.1356	40.5725	193.02	38.2508	-2.33519	0.010691	0.00208297	0.00116936
LOC_Os03g31750	105.745	4573.51	2339.63	182.846	774.781	478.814	141.681	10701	5421.32	116.238	12764.9	6440.58	290.471	24203	12246.7	343.258	10946.7	5645	196.706	10660.7	5.76011	0	0.0369671	0.0348849
LOC_Os03g32460	170.367	0	85.1834	120.334	52.2977	86.3161	22.5023	0	11.2511	151.491	0	75.7455	0	0	0	0	1.17961	0.589803	77.4491	8.91289	-3.11928	0.00217896	3.24648e-05	0.0108953
LOC_Os03g32470	5495.8	245.413	2870.61	1108.01	172.389	640.202	728.408	112.723	420.565	7891.82	98.77	3995.3	445.975	131.995	288.985	433.649	175.761	304.705	2683.94	156.175	-4.10312	1.43713e-08	0.00841597	0.0343513
LOC_Os03g45619	28022.4	41.9786	14032.2	9042.28	2339.84	5691.06	3362.01	32.4271	1697.22	24291.9	2.94836	12147.4	276.778	6.51096	141.645	375.295	18.8737	197.084	10895.1	407.096	-4.74217	0	0	3.37458e-09
LOC_Os03g54130	2003.28	60.2769	1031.78	243.795	114.28	179.037	223.356	3.0883	113.222	120.049	0	60.0247	7.82413	1.77572	4.79992	8.00935	4.71842	6.36389	434.385	30.6899	-3.82314	1.71748e-05	1.06688e-08	0.0129985
LOC_Os03g58940	4407.51	3581.63	3994.57	3535.02	2721.42	3128.22	2738.61	152.871	1445.74	2480.07	271.986	1376.03	702.215	125.484	413.85	870.73	1882.65	1376.69	2455.69	1456.01	-0.754112	0.00358237	0.0001701	0.00937029
LOC_Os03g60080	254.082	7814.48	4034.28	112.521	156.893	134.707	193.353	779.795	486.574	5025.88	4878.06	4951.97	6663.22	3552.61	5107.92	3812.45	8486.09	6149.27	2676.92	4277.99	0.67636	0.0243496	2.00457e-11	0.00637996
LOC_Os03g61720	3583.58	179.216	1881.4	973.615	284.732	629.174	503.385	3.0883	253.236	1952.23	9.58217	980.907	61.615	1.77572	31.6954	61.7864	33.029	47.4077	1189.37	85.2373	-3.80257	3.50053e-10	3.34299e-09	0.00212913
LOC_Os04g01710	368.638	58.6624	213.65	734.509	2035.74	1385.12	496.717	10.809	253.763	665.036	34.6432	349.839	192.669	2.95953	97.8143	226.55	412.862	319.706	447.353	425.946	-0.070745	0.00030999	5.15802e-06	0.000515421
LOC_Os04g02640	52.8725	12.9165	32.8945	231.292	86.1944	158.743	95.0097	2535.49	1315.25	459.237	1555.26	1007.25	13.6922	88.7858	51.239	14.8745	83.752	49.3133	144.496	727.067	2.33106	0.0375788	5.87518e-08	0.00904548
LOC_Os04g05580	890.02	10.2256	450.123	1.56279	0.968477	1.26563	30.0031	4.63245	17.3178	27.6304	0	13.8152	0	1.77572	0.887858	0	0	0	158.203	2.9337	-5.75291	0.014338	5.37314e-07	0.0499402
LOC_Os04g11970	659.437	10.2256	334.831	3080.25	1021.74	2051	521.72	32.4271	277.074	148.633	5.15963	76.8961	114.428	1.77572	58.1018	254.011	115.601	184.806	796.413	197.822	-2.00931	1.33469e-08	3.16425e-12	0.0499426
LOC_Os04g16722	17057.2	10333.7	13695.5	32176.2	6171.13	19173.7	311636	8701.28	160169	852712	110454	481583	12148.9	24834	18491.4	30219.3	22808.9	26514.1	209325	30550.6	-2.77647	0.0108995	1.0983e-06	0.0467255
LOC_Os04g16734	327.515	47.8986	187.707	207.85	72.6358	140.243	2488.59	115.811	1302.2	22068.1	1966.56	12017.3	43.0327	63.3339	53.1833	156.754	191.096	173.925	4215.31	409.555	-3.36351	0.000305555	0	0.00798395
LOC_Os04g23550	16.1555	4113.9	2065.03	6.25114	4.84238	5.54676	19.1686	3.0883	11.1285	1021.37	874.926	948.149	2220.1	4343.4	3281.75	606.422	8236.01	4421.22	648.244	2929.36	2.17598	0.0300811	0	1.12369e-06
LOC_Os04g24110	1411.4	185.136	798.269	92.2043	67.7934	79.9989	81.675	1.54415	41.6096	1092.83	66.3381	579.584	114.428	25.4519	69.9399	9.15354	44.825	26.9893	466.949	65.1815	-2.84073	0.00443579	0.000174111	0.0316911
LOC_Os04g28620	11073.8	310.534	5692.19	2691.12	785.435	1738.28	619.23	10.809	315.019	6717.05	60.4414	3388.75	67.4831	0.591905	34.0375	35.47	116.781	76.1255	3534.03	214.099	-4.04497	3.03262e-11	4.44089e-16	5.24773e-06
LOC_Os04g33450	6424	1046.24	3735.12	1065.82	1047.89	1056.86	1289.3	149.782	719.54	3408.07	324.319	1866.19	311.009	75.172	193.09	109.842	294.902	202.372	2101.34	489.717	-2.10129	0.00162469	1.0519e-05	0.0300712
LOC_Os04g34600	1173.47	702.872	938.173	246.92	253.741	250.331	403.374	37.0596	220.217	1893.16	18.4272	955.794	1176.55	203.023	689.788	906.2	1802.44	1354.32	966.614	502.927	-0.942591	0.00407996	0.00286188	0.00117888
LOC_Os04g43680	223.239	8866.63	4544.93	92.2043	315.723	203.964	139.181	634.645	386.913	1330.07	2706.59	2018.33	5610.88	3983.52	4797.2	688.804	9511.16	5099.98	1347.4	4336.38	1.68632	1.80977e-05	2.48649e-10	0.00617563
LOC_Os04g48930	1687.51	5.92006	846.716	96.8927	328.314	212.603	101.677	3.0883	52.3827	799.377	2.94836	401.163	20.5383	1.77572	11.157	130.438	2.35921	66.3986	472.739	57.4009	-3.0419	2.4932e-08	1.38143e-08	0.00155305
LOC_Os04g51460	489.07	3314.69	1901.88	82.8276	126.87	104.849	215.855	376.772	296.314	724.108	855.024	789.566	2138.92	4515.05	3326.99	112.131	5629.08	2870.61	627.152	2469.58	1.97738	0.00169117	4.95307e-07	0.0166943
LOC_Os04g54240	798.961	413.866	606.414	90.6416	798.993	444.817	135.014	3445	1790	607.869	757.728	682.799	48.9008	285.89	167.395	67.5073	293.722	180.615	291.482	999.199	1.77736	0.00108603	0.00119617	0.0458349
LOC_Os04g55159	7015.88	50.0514	3532.97	5602.59	1161.2	3381.89	1495.15	142.062	818.607	3805.38	44.9625	1925.17	90.9555	7.69477	49.3251	312.364	114.422	213.393	3053.72	253.399	-3.59108	8.95839e-12	3.78035e-11	0.0031419
LOC_Os04g55970	48.4664	2007.98	1028.22	165.655	228.561	197.108	219.189	276.403	247.796	24.7721	156.263	90.5176	424.459	1487.46	955.958	632.738	136.834	384.786	252.547	715.582	1.50257	0.0434485	0.00702754	0.0106299
LOC_Os04g59190	784.275	9247.13	5015.7	50.0091	301.196	175.603	565.891	17345.4	8955.66	211.516	7984.16	4097.84	7564.95	11213.6	9389.3	2868.49	11290	7079.25	2007.52	9563.59	2.25214	2.90521e-10	2.6006e-11	0.0155566
LOC_Os04g59200	10.2808	586.624	298.452	1.56279	0.968477	1.26563	1.66684	1504	752.834	1.90555	768.047	384.977	448.909	568.229	508.569	34.3258	674.735	354.53	83.1085	683.767	3.04044	7.26676e-09	4.8818e-09	0.000159314
LOC_Os04g59260	33.7796	5683.79	2858.79	139.088	595.613	367.351	151.682	971.27	561.476	15.2444	700.972	358.108	1315.43	5455.59	3385.51	510.31	2862.9	1686.61	360.923	2711.69	2.90943	4.089e-10	1.03208e-06	0.00631351
LOC_Os05g09440	822.46	1590.34	1206.4	231.292	76.5097	153.901	59.1727	328.904	194.038	1401.53	1054.04	1227.78	329.591	3911.31	2120.45	90.3912	1060.47	575.429	489.073	1336.93	1.4508	0.0126141	0.000132791	0.014618
LOC_Os05g09704	9502.35	2756.59	6129.47	2253.54	2464.77	2359.16	4788.82	384.493	2586.66	4143.61	1076.15	2609.88	1805.42	172.244	988.831	1249.46	2103.24	1676.35	3957.2	1492.92	-1.40635	0.000941692	0.0129271	0.0243483
LOC_Os05g09724	828.335	136.161	482.248	146.902	1371.36	759.133	280.862	1.54415	141.203	110.522	26.5352	68.5285	75.3072	2.95953	39.1334	70.9399	93.1889	82.0644	252.145	271.959	0.109136	0.0118852	1.15306e-05	0.00115202
LOC_Os05g10210	15360.9	5529.87	10445.4	9150.11	4626.41	6888.26	7964.98	210.004	4087.49	9914.56	943.475	5429.02	9648.13	208.943	4928.53	4020.69	4947.27	4483.98	9343.23	2744.33	-1.76747	3.37901e-07	0.0138082	0.000222584
LOC_Os05g11320	358.358	205.587	281.973	1734.69	4.84238	869.767	190.019	1.54415	95.7818	439.228	5.15963	222.194	9795.81	6.51096	4901.16	862.721	4.71842	433.72	2230.14	38.0605	-5.87269	0	6.19509e-11	7.42764e-05
LOC_Os05g12400	3436.71	72.6552	1754.68	1045.5	147.208	596.356	860.921	12.3532	436.637	1563.5	4.42254	783.962	212.229	0.591905	106.411	155.61	14.1553	84.8827	1212.41	41.8978	-4.85486	5.55112e-16	3.57915e-06	0.0215722
LOC_Os05g12410	252.613	15.0692	133.841	1.56279	2.90543	2.23411	2969.47	69.4867	1519.48	0	0	0	4.89008	0.591905	2.74099	3.43258	12.9757	8.20412	538.661	16.8382	-4.99957	0.0164517	0	0.0299949
LOC_Os05g12640	6515.06	886.932	3701	395.385	29.0543	212.22	1574.33	84.9282	829.628	1482.52	4.42254	743.469	905.643	7.10286	456.373	1835.28	753.768	1294.53	2118.04	294.368	-2.84703	8.19012e-13	2.01357e-09	0.00104204
LOC_Os05g16430	58.7472	0.538187	29.6427	1.56279	41.6445	21.6036	20.8355	0	10.4177	116.238	0	58.1192	2.93405	0	1.46702	0	1.17961	0.589803	33.3863	7.22705	-2.20778	0.0183211	0.0138644	0.0108673
LOC_Os05g27730	539.005	13068.8	6803.9	103.144	574.307	338.725	144.181	1348.04	746.112	3072.69	4754.23	3913.46	7762.51	8583.81	8173.16	1424.52	15047.1	8235.79	2174.34	7229.37	1.73329	7.91588e-07	3.56464e-11	0.0256818
LOC_Os05g37060	1.46868	755.615	378.542	0	3.87391	1.93695	1.66684	29.3388	15.5028	2.85832	25.7981	14.3282	1327.17	853.527	1090.35	775.762	684.172	729.967	351.487	392.054	0.15758	0.00193783	0	0.00126713
LOC_Os05g39720	14.6868	1108.13	561.407	3.12557	19.3695	11.2476	3.33367	4.63245	3.98306	110.522	22.1127	66.3172	141.812	988.482	565.147	25.1722	458.867	242.02	49.7754	433.598	3.12286	0.0028993	2.77986e-06	0.0168565
LOC_Os05g43860	2571.66	520.965	1546.31	1262.73	1084.69	1173.71	850.087	138.973	494.53	819.385	84.7653	452.075	93.8895	46.7605	70.325	72.0841	386.911	229.497	944.972	377.178	-1.32503	0.0295285	0.000140981	0.0394373
LOC_Os05g45020	346.608	5303.29	2824.95	106.269	593.676	349.973	129.18	1681.58	905.379	279.163	6560.84	3420	1329.12	1067.8	1198.46	1090.42	2904.19	1997.3	546.793	3018.56	2.46479	5.64084e-07	0.00242804	0.0317644
LOC_Os05g49370	2076.71	607.613	1342.16	1079.88	539.442	809.663	705.905	44.7803	375.343	1572.08	92.1362	832.106	125.186	5.91905	65.5525	106.41	711.302	408.856	944.362	333.532	-1.50151	0.000367787	0.00011328	0.00270059
LOC_Os06g01250	6992.38	999.951	3996.17	525.096	683.745	604.42	1012.6	220.813	616.708	3385.2	777.63	2081.42	199.515	10.6543	105.085	146.457	207.611	177.034	2043.54	483.401	-2.07978	0.00137503	1.24516e-08	0.0423034
LOC_Os06g01934	2780.21	995.646	1887.93	878.285	650.816	764.551	440.045	32.4271	236.236	1232.89	109.089	670.989	66.5051	4.14334	35.3242	73.2283	385.731	229.48	911.86	362.976	-1.32894	0.00250534	1.59565e-07	0.00758324
LOC_Os06g03080	295.205	46.8223	171.013	393.822	369.958	381.89	656.734	9.26489	332.999	49.5442	30.2207	39.8824	834.247	8.28667	421.267	359.276	8.25724	183.767	431.471	78.8016	-2.45297	2.05245e-05	0.0138165	0.0120674
LOC_Os06g03520	19.0928	1286.81	652.949	34.3813	151.082	92.7318	10.8344	3540.73	1775.78	32.3943	3689.13	1860.76	268.954	2014.25	1141.6	184.215	1328.24	756.226	91.6454	2001.71	4.44903	9.91429e-14	0.00717831	0.00134565
LOC_Os06g04990	85.1834	10945.6	5515.42	160.967	860.976	510.971	226.69	7242.06	3734.37	289.643	29701.8	14995.7	1270.44	7141.93	4206.19	2913.11	12624.1	7768.63	824.34	11419.4	3.79211	2.10942e-15	2.37152e-06	0.000650385
LOC_Os06g05000	27.9049	3888.94	1958.42	53.1347	61.014	57.0744	95.8431	2158.72	1127.28	96.2301	8760.31	4428.27	412.723	1014.53	713.624	747.158	1764.69	1255.92	238.832	2941.37	3.62242	7.02409e-08	0.00021482	2.41047e-05
LOC_Os06g05010	11.7494	5882.38	2947.07	7.81393	10.6532	9.23359	40.8375	1235.32	638.078	40.0165	5094.76	2567.39	194.625	980.195	587.41	161.331	1369.52	765.427	76.0623	2428.81	4.99692	8.06988e-12	1.04136e-05	6.88935e-05
LOC_Os06g05020	23.4989	8403.79	4213.64	34.3813	126.87	80.6259	16.6684	5651.58	2834.13	33.3471	14348.9	7191.14	237.658	1702.32	969.989	397.035	3573.03	1985.03	123.765	5634.42	5.5086	0	0.000450892	2.91051e-07
LOC_Os06g11290	23.4989	4080	2051.75	15.6279	25.1804	20.4041	22.5023	196.107	109.305	39.0637	185.747	112.405	641.578	1480.35	1060.97	170.485	1646.73	908.607	152.126	1269.02	3.06038	5.09875e-06	2.3822e-09	0.0145862
LOC_Os06g11490	6503.31	961.74	3732.53	2197.28	1091.47	1644.37	2302.73	222.357	1262.55	3508.11	412.77	1960.44	934.983	22.4924	478.738	370.718	497.794	434.256	2636.19	534.771	-2.30146	3.37089e-06	0.00123788	0.0161405
LOC_Os06g14350	133.65	0	66.8249	3.12557	32.9282	18.0269	10.8344	0	5.41722	155.302	1.47418	78.3881	0	0	0	4.57677	1.17961	2.87819	51.2481	5.93033	-3.11131	0.0105042	0.00127973	0.0422063
LOC_Os06g15170	1807.94	132.932	970.438	104.707	50.3608	77.5337	47.5048	3.0883	25.2966	134.341	0	67.1705	6.84611	0	3.42306	8.00935	35.3882	21.6988	351.559	36.9616	-3.24967	0.000600407	1.19073e-08	0.00314731
LOC_Os06g16640	339.265	29.0621	184.163	143.776	336.061	239.919	25.836	0	12.918	102.9	2.21127	52.5554	19.5603	0	9.78016	3.43258	10.6165	7.02452	105.795	62.9919	-0.748033	0.00671003	2.40164e-05	0.0166184
LOC_Os06g18670	11974.1	1534.91	6754.53	1523.72	1472.08	1497.9	2081.88	43.2362	1062.56	9373.38	387.709	4880.55	756.006	26.0438	391.025	501.156	271.309	386.233	4368.38	622.549	-2.81084	7.69435e-09	6.6069e-09	0.00158512
LOC_Os06g21110	1257.19	586.086	921.638	382.882	346.715	364.799	285.862	10.809	148.336	575.475	9.58217	292.529	88.0214	4.14334	46.0824	107.554	188.737	148.146	449.497	191.012	-1.23465	0.00153431	0.000159475	0.00847853
LOC_Os06g21250	4464.78	1204.46	2834.62	831.402	991.72	911.561	651.733	10.809	331.271	2348.59	322.845	1335.72	70.4171	11.2462	40.8317	68.6515	772.642	420.647	1405.93	552.288	-1.34803	0.00572286	1.72192e-08	8.97375e-05
LOC_Os06g21270	13056.6	2601.06	7828.81	1306.49	1468.21	1387.35	1263.46	37.0596	650.261	7616.47	703.184	4159.83	239.614	24.2681	131.941	156.754	1173.71	665.231	3939.89	1001.25	-1.97636	0.000238187	2.21831e-11	3.2301e-05
LOC_Os06g44010	8.81208	1585.5	797.155	3.12557	19.3695	11.2476	7.50076	15.4415	11.4711	233.429	163.634	198.532	533.997	609.662	571.829	101.833	1382.5	742.166	148.116	629.351	2.08713	0.00451286	1.03317e-08	0.00534229
LOC_Os07g03279	234.989	7336.57	3785.78	6.25114	248.899	127.575	22.5023	7989.43	4005.96	115.286	6447.32	3281.3	238.636	525.612	382.124	72.0841	4127.44	2099.76	114.958	4445.88	5.27329	0	1.92685e-05	0.00213627
LOC_Os07g05360	15397.6	4056.32	9726.97	779.83	3787.71	2283.77	1388.47	4999.95	3194.21	3629.11	5138.25	4383.68	415.657	859.446	637.551	318.085	4224.17	2271.13	3654.8	3844.31	0.0729321	0.00733924	1.6706e-06	0.0123024
LOC_Os07g14740	145.399	1223.3	684.349	32.8185	417.414	225.116	20.8355	477.142	248.989	24.7721	661.907	343.339	2826.47	1074.9	1950.68	24.028	279.567	151.797	512.386	689.038	0.427351	4.41918e-07	1.29518e-09	0.0336127
LOC_Os07g18154	2887.42	145.849	1516.64	393.822	400.949	397.386	178.352	44.7803	111.566	1156.67	57.493	607.08	43.0327	10.0624	26.5475	33.1816	228.844	131.013	782.08	147.996	-2.40176	0.00837426	2.3893e-05	0.00517825
LOC_Os07g18162	1618.48	243.799	931.142	0	1.93695	0.968477	285.862	7.72074	146.792	695.524	57.493	376.509	9.78016	8.28667	9.03341	0	4.71842	2.35921	434.942	53.9924	-3.00999	0.0452063	3.33555e-12	0.00791975
LOC_Os07g23120	2042.93	90.9536	1066.94	346.938	205.317	276.128	543.389	3.0883	273.239	565.947	6.63381	286.291	178.977	3.55143	91.2642	42.3351	120.32	81.3275	620.087	71.644	-3.11355	1.35959e-06	0.00307838	0.000557774
LOC_Os07g23570	0	966.584	483.292	0	0.968477	0.484238	0	24.7064	12.3532	5.71664	34.6432	20.1799	120.296	228.475	174.386	12.5861	471.842	242.214	23.0998	287.87	3.63947	1.00225e-05	7.49828e-08	0.0140855
LOC_Os07g23640	1086.82	67.2734	577.048	5075.93	2135.49	3605.71	2570.26	26.2505	1298.26	3281.35	100.981	1691.17	3220.61	603.151	1911.88	1994.33	1124.16	1559.25	2871.55	676.219	-2.08627	6.01108e-09	0.000111989	0.00312435
LOC_Os07g24830	543.411	28903.9	14723.6	21.879	15956.6	7989.25	51.6719	6.1766	28.9243	1107.12	104374	52740.6	185.823	25606.4	12896.1	61.7864	55919.2	27990.5	328.616	38461.1	6.87085	0	1.78936e-09	9.33138e-10
LOC_Os07g25050	212.958	6670.29	3441.62	0	1898.21	949.107	17.5018	4.63245	11.0671	445.898	29391.5	14918.7	46.9448	3166.69	1606.82	18.3071	11517.7	5767.99	123.602	8774.83	6.1496	0	8.39329e-14	3.40722e-09
LOC_Os07g34320	497.882	266.941	382.412	57.8231	43.5815	50.7023	93.3429	1.54415	47.4435	473.528	6.63381	240.081	108.56	4.73524	56.6475	73.2283	117.961	95.5945	217.394	73.566	-1.5632	0.00542329	0.0125583	0.034395
LOC_Os07g34570	21679.2	2218.41	11948.8	9625.2	3339.31	6482.25	18934.4	375.228	9654.83	24702.6	134.887	12418.7	5839.73	39.0657	2939.4	4565.33	208.79	2387.06	14224.4	1052.61	-3.75632	0	1.46172e-06	0.000417792
LOC_Os07g37320	447.947	12517.7	6482.82	185.971	283.764	234.868	186.686	1740.26	963.471	1149.04	878.611	1013.83	6409.92	11804.4	9107.14	2238.04	7529.43	4883.73	1769.6	5792.35	1.71073	0.000467419	1.62236e-10	0.0113367
LOC_Os07g40690	2382.2	176.525	1279.36	2330.11	2303.04	2316.58	430.044	6.1766	218.11	140.058	32.4319	86.2448	115.406	15.9814	65.6937	80.0935	95.5481	87.8208	912.985	438.284	-1.05873	0.000232726	1.42997e-13	0.012768
LOC_Os07g40900	409.762	1.07637	205.419	104.707	27.1174	65.912	12.5013	3.0883	7.79479	736.494	19.1643	377.829	1.95603	1.18381	1.56992	0	2.35921	1.17961	210.903	8.99823	-4.5508	0.00955598	8.32033e-05	0.0185387
LOC_Os07g48500	2233.86	6301.09	4267.48	1533.09	564.622	1048.86	1876.02	284.123	1080.07	3266.11	1082.78	2174.45	6295.49	477.076	3386.28	1766.63	4238.32	3002.48	2828.53	2158	-0.390357	0.0257333	0.00750343	0.00421101
LOC_Os07g48770	6739.77	574.784	3657.28	1133.02	780.592	956.806	1074.28	58.6777	566.477	3435.7	117.934	1776.82	266.998	118.973	192.986	183.071	287.824	235.447	2138.81	323.131	-2.72662	9.29662e-05	0.000195155	0.00536782
LOC_Os08g04240	2.93736	48.4368	25.6871	1.56279	11.6217	6.59225	0.833418	1995.04	997.937	3.81109	22.1127	12.9619	9.78016	5959.89	2984.84	1.14419	99.0869	50.1156	3.34483	1356.03	8.66324	2.25375e-14	5.12434e-10	0.00056745
LOC_Os08g04250	2.93736	30.6767	16.807	0	2.90543	1.45272	4.16709	1067.01	535.587	6.66941	42.0141	24.3418	2.93405	3231.8	1617.37	2.28838	38.927	20.6077	3.16605	735.555	7.86001	4.62187e-10	6.83204e-08	0.0117938
LOC_Os08g04340	2.93736	1058.61	530.776	0	22.275	11.1375	1.66684	10.809	6.23794	17.1499	27.2723	22.2111	375.558	2045.62	1210.59	35.47	898.86	467.165	72.1304	677.242	3.23099	8.66136e-07	1.51879e-13	0.0154463
LOC_Os08g04350	1.46868	1543.52	772.494	0	10.6532	5.32662	1.66684	1.54415	1.60549	22.8666	27.2723	25.0694	212.229	903.247	557.738	14.8745	398.707	206.791	42.1843	480.824	3.51073	0.000221838	2.9704e-10	0.00295692
LOC_Os08g04370	0	412.789	206.395	0	3.87391	1.93695	0.833418	4.63245	2.73293	5.71664	5.89672	5.80668	112.472	277.604	195.038	1.14419	264.232	132.688	20.0277	161.505	3.01151	0.00152658	5.08874e-06	0.0174427
LOC_Os08g07080	684.405	4.3055	344.355	7.81393	30.0228	18.9184	7.50076	0	3.75038	86.7024	0	43.3512	0.978016	0	0.489008	0	1.17961	0.589803	131.233	5.91798	-4.47088	0.00952939	4.98134e-06	0.00633684
LOC_Os08g09010	104.276	106.023	105.15	7.81393	35.8336	21.8238	5.83393	3106.83	1556.33	16.1971	632.423	324.31	1.95603	58.0067	29.9814	5.72096	56.6211	31.171	23.633	665.956	4.81655	5.83626e-07	1.28725e-06	0.00441795
LOC_Os08g14195	2.93736	5.38187	4.15961	1545.59	1021.74	1283.67	4.16709	302.653	153.41	1.90555	22.1127	12.0091	809.797	945.273	877.535	2.28838	10.6165	6.45242	394.448	384.63	-0.0363654	0.0155532	0	0.0325959
LOC_Os08g15420	0	566.173	283.086	9.37671	1.93695	5.65683	0	18.5298	9.26489	1.90555	5.15963	3.53259	0	22.4924	11.2462	4.57677	1.17961	2.87819	2.64317	102.579	5.27831	0.0357303	0.0167979	0.00222337
LOC_Os08g16260	3140.04	248.642	1694.34	520.408	339.935	430.171	88.3423	3.0883	45.7153	457.331	3.68545	230.508	8.80214	1.77572	5.28893	3.43258	113.242	58.3374	703.059	118.395	-2.57004	0.000966275	2.80793e-11	4.96249e-05
LOC_Os08g26710	700.56	3.22912	351.895	0	0	0	0	1.54415	0.772074	61.9303	0	30.9651	0	0	0	5.72096	5.89803	5.8095	128.035	1.77855	-6.16969	0.04287	1.57768e-06	0.0183003
LOC_Os08g28710	2.93736	3146.78	1574.86	1.56279	0.968477	1.26563	10.001	10.809	10.405	78.1274	43.4883	60.8078	968.236	2276.47	1622.35	211.676	3481.02	1846.35	212.09	1493.26	2.81571	0.00676465	0	6.74846e-06
LOC_Os08g31030	3026.95	131.318	1579.13	1476.83	1445.94	1461.38	1848.52	452.436	1150.48	3336.61	686.968	2011.79	230.812	229.659	230.235	140.736	373.935	257.335	1676.74	553.375	-1.59933	0.0368227	0.00828617	0.0134302
LOC_Os08g32160	2558.44	306.228	1432.33	2431.69	987.846	1709.77	897.592	77.2074	487.399	2686.82	144.47	1415.65	82.1533	36.1062	59.1298	70.9399	161.606	116.273	1454.61	285.577	-2.34868	0.000341823	3.22392e-06	0.037515
LOC_Os08g34320	1023.67	79.1135	551.391	978.304	720.547	849.425	862.588	74.1191	468.354	1326.26	67.8123	697.036	106.604	62.15	84.3769	80.0935	171.043	125.568	729.586	195.797	-1.89772	0.0032017	0.0150718	0.0352708
LOC_Os08g35750	549.286	188.904	369.095	34.3813	20.338	27.3596	190.853	18.5298	104.691	1004.22	53.8075	529.015	781.435	2.36762	391.901	239.136	38.927	139.032	466.552	53.8123	-3.11603	2.74859e-05	0.0252389	0.04255
LOC_Os08g35760	31141.9	3383.58	17262.7	94684.5	33544.2	64114.3	49295.9	436.994	24866.4	25399	548.395	12973.7	9882.85	365.797	5124.32	5639.72	5065.23	5352.48	36007.3	7224.03	-2.31741	6.94632e-11	8.2788e-10	0.000211375
LOC_Os08g36910	2.93736	405.255	204.096	0	10.6532	5.32662	3.33367	49.4128	26.3732	6.66941	159.211	82.9404	1176.55	1788.15	1482.35	562.943	1325.88	944.41	292.073	623.092	1.09312	3.01316e-06	0	0.0256501
LOC_Os08g37660	30.8423	6001.32	3016.08	3.12557	30.9913	17.0584	29.1696	1003.7	516.433	1218.6	1511.77	1365.18	2561.42	10101.5	6331.44	1115.59	9875.66	5495.62	826.458	4754.15	2.52417	1.24834e-09	0	0.000398002
LOC_Os09g19229	509.632	6.99643	258.314	0	0.968477	0.484238	10.8344	0	5.41722	43.8276	0	21.9138	10.7582	0.591905	5.67504	6.86515	12.9757	9.92041	96.9862	3.58875	-4.75623	0.00456231	0.00122664	0.049825
LOC_Os09g03939	1984.19	254.562	1119.37	564.166	530.725	547.445	212.522	13.8973	113.21	2205.67	69.2864	1137.48	35.2086	4.73524	19.9719	48.0561	209.97	129.013	841.635	180.529	-2.22096	0.000936175	3.71363e-07	0.00571353
LOC_Os09g13650	5052.26	1139.88	3096.07	1748.76	1492.42	1620.59	815.083	26.2505	420.667	2007.49	61.9155	1034.7	269.932	8.87858	139.405	146.457	270.13	208.293	1673.33	499.913	-1.74297	9.33993e-06	7.7001e-09	0.000697932
LOC_Os09g17152	13.2181	1470.87	742.042	10.9395	6.77934	8.85942	20.002	43.2362	31.6191	306.793	686.231	496.512	582.897	1060.69	821.796	138.447	2153.96	1146.2	178.716	903.628	2.33806	0.00242384	1.65333e-08	0.00672718
LOC_Os09g20090	38.1857	1728.12	883.152	23.4418	36.8021	30.122	26.6694	231.622	129.146	31.4415	184.272	107.857	1018.11	1228.8	1123.45	17.1629	883.525	450.344	192.503	715.523	1.89412	2.1115e-05	5.82889e-08	0.0268923
LOC_Os09g36680	2401.29	41.4404	1221.37	1995.68	35.8336	1015.76	2575.26	24.7064	1299.98	75230	22.8498	37626.4	814.687	30.7791	422.733	2616.77	40.1066	1328.44	14272.3	32.6193	-8.77327	0	7.59522e-09	0.000679338
LOC_Os09g36700	2355.76	1676.99	2016.38	9973.7	2485.11	6229.4	7677.45	46.3245	3861.89	35851	1141.01	18496	4297.4	346.856	2322.13	6461.25	678.274	3569.76	11102.8	1062.43	-3.38548	1.19328e-11	0.000516246	0.000423614
LOC_Os10g01920	2715.59	329.909	1522.75	6.25114	2.90543	4.57829	20.8355	0	10.4177	92.419	2.21127	47.3151	0.978016	2.36762	1.67282	0	1.17961	0.589803	472.679	56.4288	-3.06636	0.00535564	0	0.0323236
LOC_Os10g02040	10321.9	9592.11	9956.99	1976.92	5800.21	3888.57	4460.45	17246.6	10853.5	3440.46	8638.69	6039.58	678.743	7101.68	3890.21	536.626	11176.8	5856.7	3569.18	9926.01	1.47562	1.27703e-05	0.0109982	0.0479479
LOC_Os10g02220	2009.15	213.66	1111.41	831.402	578.181	704.791	558.39	26.2505	292.32	1788.36	85.5024	936.929	228.856	7.10286	117.979	153.322	129.757	141.539	928.246	173.409	-2.42033	3.949e-06	0.000372017	0.0433469
LOC_Os10g02750	0	180.831	90.4154	0	1.93695	0.968477	2.50025	155.959	79.2296	20.961	22.1127	21.5369	34.2306	726.86	380.545	33.1816	60.1599	46.6707	15.1456	191.31	3.65894	0.000755832	0.00140884	0.0498084
LOC_Os10g11270	330.453	3.76731	167.11	310.994	34.8652	172.93	102.51	0	51.2552	488.773	0	244.386	4.89008	1.18381	3.03694	6.86515	0	3.43258	207.414	6.63605	-4.96605	2.52565e-07	0.000186973	0.0475635
LOC_Os10g13694	2217.71	674.886	1446.3	0	5.81086	2.90543	1047.61	2201.96	1624.78	0	9.58217	4.79108	2.93405	27.8195	15.3768	3.43258	30.6698	17.0512	545.28	491.788	-0.148962	0.00449418	0	0.0291131
LOC_Os10g21190	4052.09	1948.78	3000.43	23654.3	2538.38	13096.4	48584.1	2317.77	25450.9	54585.3	7210.95	30898.1	3027.94	4061.65	3544.79	8735.91	3703.96	6219.94	23773.3	3630.25	-2.7112	2.21027e-05	0.00431791	0.0216361
LOC_Os10g21268	409.762	107.099	258.43	265.674	141.398	203.536	4991.34	131.253	2561.3	9256.19	1398.26	5327.23	68.4611	78.7234	73.5922	144.168	218.227	181.198	2522.6	345.827	-2.86679	0.00451947	3.91354e-12	0.0090496
LOC_Os10g21670	954.641	3440.63	2197.64	28.1301	177.231	102.681	1193.46	107396	54294.5	80.033	5569.45	2824.74	13.6922	1742.57	878.13	26.3164	842.239	434.278	382.711	19861.3	5.69756	0	0	0.00220281
LOC_Os10g22570	625.657	1511.23	1068.44	242.232	630.478	436.355	465.047	3824.86	2144.95	7.62219	1136.59	572.107	234.724	1468.52	851.62	218.541	938.966	578.754	298.971	1585.11	2.4065	2.08236e-06	0.0471263	0.0260691
LOC_Os10g25290	85.1834	4185.48	2135.33	28.1301	147.208	87.6693	81.675	223.902	152.788	967.065	926.522	946.793	1688.06	4694.4	3191.23	767.753	6770.94	3769.35	602.977	2824.74	2.22794	2.50047e-05	2.33792e-10	0.0238049
LOC_Os10g26700	0	2003.13	1001.57	9.37671	36.8021	23.0894	5.00051	248.608	126.804	4.76387	1474.92	739.84	31.2965	2814.51	1422.9	17.1629	2155.14	1086.15	11.2667	1455.52	7.01332	0	0.00707227	0.00155567
LOC_Os10g30150	1.46868	2083.86	1042.66	0	115.249	57.6244	4.16709	857.003	430.585	7.62219	2610.03	1308.83	86.0654	675.364	380.715	45.7677	3630.83	1838.3	24.1818	1662.06	6.1029	0	4.8022e-06	0.0097481
LOC_Os10g31460	4.40604	167.376	85.8911	1.56279	0.968477	1.26563	4.16709	4334.43	2169.3	1.90555	29.4836	15.6946	10.7582	3669.22	1839.99	5.72096	119.14	62.4306	4.75343	1386.77	8.18854	2.9754e-14	3.47037e-10	0.00190839
LOC_Os10g34480	6337.35	1137.73	3737.54	851.718	650.816	751.267	692.571	163.68	428.125	4578.08	368.545	2473.31	118.34	71.6205	94.9802	120.14	803.312	461.726	2116.37	532.617	-1.99042	0.0242129	1.34018e-06	0.0077511
LOC_Os10g38540	1722.76	31.753	877.257	1286.17	267.3	776.736	136.681	1.54415	69.1124	851.779	4.42254	428.101	113.45	1.77572	57.6128	56.0654	20.0533	38.0594	694.485	54.4747	-3.67228	3.01479e-10	8.20672e-08	0.0314311
LOC_Os10g40440	63.1532	224.424	143.789	25.0046	65.8564	45.4305	44.1712	87412.7	43728.4	42.8748	9103.06	4572.97	44.0107	40591.1	20317.5	18.3071	1470.97	744.638	39.5869	23144.7	9.19144	0	1.44051e-08	1.41065e-10
LOC_Os10g40480	32.3109	737.854	385.083	21.879	92.0053	56.9421	9.1676	2550.93	1280.05	15.2444	590.409	302.827	807.841	2697.31	1752.58	109.842	1729.3	919.573	166.048	1399.64	3.07538	5.01607e-11	5.71341e-08	0.0126413
LOC_Os10g42780	4826.08	270.17	2548.12	987.68	1288.07	1137.88	950.93	43.2362	497.083	1978.91	218.179	1098.54	122.252	24.2681	73.26	133.87	179.3	156.585	1499.95	337.204	-2.15322	0.000150678	6.29495e-07	0.0127806
LOC_Os11g01140	2470.32	1334.7	1902.51	498.529	1955.35	1226.94	730.074	5603.72	3166.9	1381.52	2584.97	1983.25	139.856	1140.6	640.229	124.717	2097.34	1111.03	890.836	2452.78	1.46119	9.43351e-05	0.00936783	0.0450447
LOC_Os11g02369	13157.9	1956.31	7557.1	1578.41	2761.13	2169.77	630.064	296.477	463.27	2481.02	429.723	1455.37	408.811	52.6796	230.745	175.061	2013.59	1094.32	3071.88	1251.65	-1.29529	0.0439733	8.61943e-09	0.000413982
LOC_Os11g05380	13.2181	2725.92	1369.57	7.81393	42.613	25.2135	33.3367	112.723	73.0298	2524.85	1340.03	1932.44	1962.88	1539.55	1751.21	479.417	7174.36	3826.89	836.919	2155.87	1.36511	0.000528503	1.9984e-15	3.15391e-05
LOC_Os11g06720	46783.3	12414.9	29599.1	24162.2	16549.3	20355.8	42533.5	1663.05	22098.3	36651.3	7461.56	22056.4	14713.3	756.455	7734.86	12645.6	9545.37	11095.5	29581.5	8065.11	-1.87493	4.23774e-06	0.0358669	0.0184289
LOC_Os11g07120	342.202	853.026	597.614	1.56279	0	0.781393	74.1742	2975.57	1524.87	141.963	3649.33	1895.65	15.6483	481.811	248.73	67.5073	1513.43	790.471	107.176	1578.86	3.88083	1.8083e-09	3.60239e-11	0.030076
LOC_Os11g15624	1856.41	866.481	1361.45	579.793	1413.98	996.885	414.209	336.624	375.417	8580.68	1377.62	4979.15	418.591	29.5953	224.093	728.85	641.706	685.278	2096.42	777.667	-1.4307	0.0427712	1.45047e-06	0.0381828
LOC_Os11g27264	5946.68	1176.48	3561.58	3.12557	0.968477	2.04702	975.933	16.9856	496.459	2265.69	50.8592	1158.28	321.767	7.10286	164.435	155.61	372.756	264.183	1611.47	270.858	-2.57277	1.81656e-07	0	0.000831121
LOC_Os11g30560	7117.22	3426.1	5271.66	2636.42	2946.11	2791.26	1941.86	299.565	1120.71	4007.36	622.104	2314.73	1054.3	73.9881	564.145	909.633	2450.04	1679.84	2944.47	1636.32	-0.847554	0.00437613	0.000212501	0.00976355
LOC_Os11g32650	14716.2	4513.77	9614.97	3345.92	4424.97	3885.45	2966.97	277.947	1622.46	9113.28	1532.41	5322.84	903.687	152.712	528.199	723.129	2310.85	1516.99	5294.86	2202.11	-1.26571	0.00354365	9.38809e-07	0.00676591
LOC_Os11g42220	4185.74	43.055	2114.4	979.867	243.088	611.477	190.853	1.54415	96.1985	182.932	0	91.4662	17.6043	1.18381	9.39405	22.8838	34.2086	28.5462	929.979	53.8465	-4.11027	1.74359e-08	5.96967e-13	0.000180947
LOC_Os11g42550	7477.05	398.797	3937.92	6277.71	1129.24	3703.48	7759.12	242.431	4000.78	1678.79	10.3193	844.553	2624.02	46.1686	1335.09	1640.77	415.221	1028	4576.24	373.697	-3.61422	9.99201e-16	5.23023e-05	0.00875222
LOC_Os11g45990	273.174	49.5132	161.344	164.092	84.2575	124.175	32.5033	0	16.2517	72.4108	13.2676	42.8392	31863.8	19.5329	15941.6	43.4793	82.5724	63.0259	5408.24	41.5239	-7.02507	6.3675e-06	0	1.32789e-08
LOC_Os11g46000	176.242	19.3747	97.8081	32.8185	4.84238	18.8304	5.00051	0	2.50025	15.2444	5.15963	10.202	16231.1	15.3895	8123.27	18.3071	23.5921	20.9496	2746.46	11.3931	-7.91327	6.82246e-06	0	1.18145e-05
LOC_Os11g47510	1.46868	1132.88	567.176	1.56279	33.8967	17.7297	2.50025	3.0883	2.79428	10.4805	379.601	195.041	85.0874	4102.49	2093.79	11.4419	1441.48	726.46	18.7569	1182.24	5.97796	7.4829e-14	8.06466e-11	0.0144185
LOC_Os11g47970	56132.9	3818.97	29975.9	3355.3	3712.17	3533.74	7850.8	1009.87	4430.34	36997.1	3251.3	20124.2	1376.07	411.966	894.017	1760.91	1373.06	1566.99	17912.2	2262.89	-2.9847	1.71208e-05	2.16639e-08	0.0275325
LOC_Os12g05440	5.87472	1281.96	643.918	1.56279	2.90543	2.23411	2.50025	54.0452	28.2727	915.615	482.057	698.836	340.349	342.713	341.531	117.852	1905.06	1011.46	230.626	678.124	1.556	0.00109208	7.07823e-12	0.000709633
LOC_Os12g14440	279.049	22.0657	150.557	3.12557	0	1.56279	0	13.8973	6.94867	20.961	14.0047	17.4829	11187.5	71.6205	5629.57	42.3351	7.07764	24.7064	1922.17	21.4443	-6.48599	0.000658166	0	3.49415e-06
LOC_Os12g18410	274.643	1091.44	683.043	31.2557	1245.46	638.358	70.0071	172.945	121.476	2746.85	2210.53	2478.69	11.7362	2.95953	7.34786	90.3912	756.128	423.259	537.48	913.245	0.764791	0.0100875	4.94604e-13	0.00615286
LOC_Os12g26940	707.903	25.833	366.868	170.344	136.555	153.449	146.682	3.0883	74.885	953.726	35.3803	494.553	13.6922	5.32715	9.50968	9.15354	18.8737	14.0136	333.583	37.5096	-3.15272	0.00300274	0.000994903	0.0432022
LOC_Os12g27370	2401.29	325.603	1363.45	53.1347	125.902	89.5183	1890.19	140.518	1015.36	55.2608	61.1784	58.2196	725.688	66.2934	395.991	907.344	122.679	515.012	1005.49	140.362	-2.84066	0.00106074	0.00433613	0.0420764
LOC_Os12g29160	2163.36	138.852	1151.11	32.8185	17.4326	25.1255	110.011	91.1048	100.558	1726.43	512.277	1119.35	485.096	11.8381	248.467	70.9399	77.854	74.397	764.776	141.56	-2.43362	0.0040862	1.01652e-06	0.044488
LOC_Os12g31860	232.051	28.5239	130.288	1058.01	98.7846	578.395	274.195	824.575	549.385	3883.5	519.648	2201.58	139.856	454.583	297.22	189.936	60.1599	125.048	962.925	331.046	-1.54039	0.024492	2.82141e-05	0.00955198
LOC_Os12g33120	2981.42	2444.98	2713.2	6601.21	1982.47	4291.84	2520.26	7.72074	1263.99	2530.57	27.2723	1278.92	2445.04	17.1652	1231.1	1927.96	436.454	1182.21	3167.74	819.345	-1.95091	5.53446e-11	6.53187e-07	5.39446e-07
LOC_Os12g44030	143.931	186.213	165.072	29.6929	3716.05	1872.87	76.6745	137.429	107.052	67.6469	180.587	124.117	57.7029	82.2748	69.9889	28.6048	155.708	92.1564	67.3754	743.043	3.46315	0.00793141	0.000872256	0.0309055
LOC_Os01g01650	6221.33	1076.91	3649.12	323.497	241.151	282.324	1251.79	435.45	843.622	4884.87	692.127	2788.5	587.787	44.9848	316.386	418.774	489.537	454.155	2281.34	496.694	-2.19945	0.000562742	1.39466e-05	NA
LOC_Os01g03320	86.6521	6.99643	46.8243	1.56279	0	0.781393	18.3352	1.54415	9.93968	184.838	1.47418	93.1561	189.735	14.7976	102.266	65.219	7.07764	36.1483	91.057	5.315	-4.09863	0.000206232	0.0295848	NA
LOC_Os01g03390	378.919	2770.59	1574.75	248.483	893.904	571.193	212.522	903.327	557.924	593.578	1077.63	835.601	1478.76	1280.88	1379.82	894.758	5601.95	3248.35	634.503	2088.05	1.71845	0.000768986	0.0154372	NA
LOC_Os01g04640	497.882	266.403	382.142	1653.43	829.016	1241.22	305.865	140.518	223.191	745.069	279.357	512.213	383.382	140.873	262.128	1191.1	789.157	990.13	796.121	407.554	-0.965998	0.0422229	0.0220546	NA
LOC_Os01g05410	0	0	0	0	0	0	0	4.63245	2.31622	0	0	0	3.91206	24.86	14.386	0	15.3349	7.66744	0.652011	7.47122	3.51838	0.0317076	0.00722475	NA
LOC_Os01g05760	24.9675	2.15275	13.5601	0	0	0	2.50025	0	1.25013	18.1027	0	9.05135	0	0	0	0	0	0	7.59508	0.358791	-4.40385	0.0252741	0.0149681	NA
LOC_Os01g06590	633.001	4376	2504.5	210.976	390.296	300.636	271.694	691.779	481.737	1282.43	1510.3	1396.36	2060.68	10901.7	6481.19	1052.66	7468.09	4260.37	918.573	4223.03	2.20081	0.000214518	2.16988e-06	NA
LOC_Os01g07364	1.46868	16.6838	9.07624	0	0.968477	0.484238	0	0	0	19.0555	12.5305	15.793	0	7.10286	3.55143	1.14419	42.4658	21.805	3.61139	13.2919	1.87992	0.0481257	0.0221611	NA
LOC_Os01g07500	249.675	685.65	467.663	353.19	830.953	592.071	395.04	684.058	539.549	128.624	503.432	316.028	720.798	3437.19	2079	768.897	2169.3	1469.1	436.037	1385.1	1.66746	0.00257767	0.0158528	NA
LOC_Os01g08250	19.0928	33.9058	26.4993	4.68836	6.77934	5.73385	231.69	379.861	305.775	9.52773	39.8028	24.6653	16.6263	94.1129	55.3696	8.00935	173.402	90.7057	48.2725	121.311	1.32943	0.0428355	0.00154615	NA
LOC_Os01g09100	1.46868	203.973	102.721	0	5.81086	2.90543	1.66684	1.54415	1.60549	32.3943	59.7043	46.0493	24.4504	53.2715	38.8609	10.2977	154.528	82.4131	11.713	79.8053	2.76838	0.021601	0.0253486	NA
LOC_Os01g09540	7823.65	115.172	3969.41	7043.47	1110.84	4077.16	5177.19	179.121	2678.16	13842.8	199.751	7021.3	1163.84	37.29	600.564	1049.22	152.169	600.697	6016.7	299.058	-4.33048	0	7.62455e-06	NA
LOC_Os01g10520	0	7.53462	3.76731	110.958	406.76	258.859	0	0	0	0.952773	5.15963	3.0562	124.208	702	413.104	70.9399	756.128	413.534	51.1764	312.93	2.61229	0.00133681	6.0818e-13	NA
LOC_Os01g10530	828.335	470.375	649.355	243.795	568.496	406.145	176.685	1131.86	654.273	1477.75	1868.52	1673.14	158.439	805.583	482.011	157.899	622.832	390.365	507.15	911.278	0.845478	0.0176523	0.0342814	NA
LOC_Os01g11150	26.4362	544.107	285.272	6.25114	54.2347	30.2429	17.5018	315.006	166.254	64.7886	677.385	371.087	122.252	728.635	425.444	110.987	1933.37	1022.18	58.0361	708.791	3.61034	2.35788e-08	0.000868673	NA
LOC_Os01g11550	1852	1450.95	1651.48	5518.2	7074.72	6296.46	6839.03	1715.55	4277.29	1181.44	1725.53	1453.48	5797.68	1604.65	3701.17	9618.08	2184.63	5901.36	5134.4	2626.01	-0.967327	0.0477334	0.0305859	NA
LOC_Os01g11700	296.673	168.453	232.563	73.4509	379.643	226.547	242.525	572.879	407.702	178.169	426.038	302.103	12.7142	58.0067	35.3605	16.0187	139.194	77.6061	136.592	290.702	1.08967	0.0265334	0.0218692	NA
LOC_Os01g12320	1139.7	284.163	711.929	12.5023	11.6217	12.062	499.218	702.588	600.903	14.2916	14.0047	14.1482	209.295	10.0624	109.679	184.215	24.7717	104.493	343.203	174.535	-0.975544	0.047594	3.3442e-08	NA
LOC_Os01g14440	133.65	4402.37	2268.01	43.758	215.97	129.864	37.5038	477.142	257.323	616.444	1300.23	958.335	1894.42	3194.51	2544.46	319.23	4095.59	2207.41	507.5	2280.97	2.16817	4.91567e-07	5.25995e-08	NA
LOC_Os01g14670	5692.6	1609.72	3651.16	2536.4	2924.8	2730.6	1735.18	427.729	1081.45	3515.73	799.005	2157.37	777.523	274.644	526.083	409.621	971.995	690.808	2444.51	1167.98	-1.06553	0.0327781	0.00268009	NA
LOC_Os01g14770	1680.17	347.131	1013.65	4.68836	1.93695	3.31266	1192.62	1448.41	1320.52	683.138	243.977	463.558	0.978016	0	0.489008	2.28838	0	1.14419	593.981	340.243	-0.803852	0.0386483	0	NA
LOC_Os01g15270	6338.82	48608.5	27473.7	2275.42	14012.9	8144.15	2821.12	21519.3	12170.2	9848.82	13707.7	11778.2	42877.2	60005	51441.1	13752	90170.3	51961.2	12985.6	41337.3	1.67053	2.78431e-05	9.71359e-05	NA
LOC_Os01g15340	0	75.8844	37.9422	3.12557	23.2434	13.1845	0	72.575	36.2875	1.90555	12.5305	7.21804	75.3072	244.457	159.882	34.3258	158.067	96.1965	19.1107	97.7929	2.35535	0.000633165	0.0065439	NA
LOC_Os01g17050	280.518	1826.61	1053.56	73.4509	126.87	100.161	225.856	335.08	280.468	846.063	1649.61	1247.83	708.083	2275.88	1491.98	371.862	3812.49	2092.17	417.639	1671.09	2.00046	0.00144332	0.000351199	NA
LOC_Os01g19020	7145.12	4959.93	6052.53	865.783	2106.44	1486.11	1447.65	8245.75	4846.7	4111.22	7457.14	5784.18	2119.36	2635.16	2377.26	567.519	2964.35	1765.93	2709.44	4728.13	0.803274	0.0132456	0.00546993	NA
LOC_Os01g19130	543.411	3436.86	1990.14	142.213	205.317	173.765	235.857	409.199	322.528	1553.02	1440.27	1496.65	842.072	1129.36	985.713	516.031	2234.17	1375.1	638.767	1475.86	1.2082	0.0402747	0.00136019	NA
LOC_Os01g19330	0	194.286	97.1428	0	0	0	0.833418	4.63245	2.73293	24.7721	47.9108	36.3415	51.8348	94.1129	72.9739	19.4513	171.043	95.2471	16.1486	85.3308	2.40166	0.0255502	0.000621907	NA
LOC_Os01g19820	318.703	4282.89	2300.8	35.9441	396.107	216.026	93.3429	1090.17	591.756	364.912	3400.19	1882.55	91.9335	1152.44	622.186	61.7864	3396.09	1728.94	161.104	2286.31	3.82696	9.84102e-13	0.00110436	NA
LOC_Os01g20980	19.0928	205.049	112.071	6.25114	14.5272	10.3891	10.001	108.09	59.0457	13.3388	35.3803	24.3596	55.7469	1989.99	1022.87	3.43258	121.499	62.466	17.9772	412.422	4.51988	2.26226e-05	6.00767e-05	NA
LOC_Os01g21120	192.397	12638.2	6415.32	121.897	1053.7	587.8	208.355	8052.74	4130.55	916.568	14226.6	7571.57	1370.2	10724.7	6047.46	586.971	28112.4	14349.7	566.065	12468.1	4.46113	0	8.29953e-05	NA
LOC_Os01g22640	3093.04	735.702	1914.37	1512.78	1147.65	1330.21	1537.66	277.947	907.802	2185.66	253.559	1219.61	809.797	134.362	472.08	683.083	237.101	460.092	1637	464.386	-1.81766	8.4698e-05	0.042519	NA
LOC_Os01g24030	45.5291	614.071	329.8	1.56279	0	0.781393	4.16709	809.134	406.651	20.0082	1173.45	596.728	3.91206	137.914	70.913	1.14419	110.883	56.0136	12.7206	474.242	5.22039	3.17335e-09	1.4144e-05	NA
LOC_Os01g24560	0	36.5967	18.2984	0	2.90543	1.45272	0	193.019	96.5093	0.952773	214.493	107.723	8.80214	704.367	356.585	0	74.3152	37.1576	1.62582	204.283	6.97326	7.77712e-11	0.000358858	NA
LOC_Os01g24600	0	1.07637	0.538187	0	2.90543	1.45272	0.833418	186.842	93.8377	0.952773	51.5963	26.2745	1.95603	133.179	67.5673	1.14419	28.3105	14.7274	0.814403	67.3182	6.36911	1.80759e-05	0.0385336	NA
LOC_Os01g24790	89.5894	11.8401	50.7148	0	0	0	8.33418	0	4.16709	6.66941	0	3.33471	0	0	0	0	0	0	17.4322	1.97335	-3.14303	0.0264952	0.000109319	NA
LOC_Os01g27100	0	0	0	29.6929	7.74781	18.7204	32.5033	0	16.2517	0	0	0	3.91206	0	1.95603	6.86515	1.17961	4.02238	12.1622	1.4879	-3.03106	0.0298988	0.0102726	NA
LOC_Os01g27210	368.638	1112.43	740.535	120.334	233.403	176.869	23.3357	80.2957	51.8157	270.588	490.165	380.376	614.194	1428.86	1021.53	382.16	1030.98	706.568	296.542	729.355	1.29839	0.0181352	0.000582396	NA
LOC_Os01g28474	7.3434	72.1171	39.7302	0	0.968477	0.484238	3.33367	118.899	61.1166	8.57496	48.6479	28.6114	0	0	0	0	0	0	3.20867	40.1055	3.64375	0.019754	0.000210286	NA
LOC_Os01g28744	27.9049	23.6802	25.7926	189.097	136.555	162.826	33.3367	637.733	335.535	1.90555	4.42254	3.16404	7.82413	99.4401	53.6321	17.1629	154.528	85.8456	46.2052	176.06	1.92994	0.0329853	0.00122146	NA
LOC_Os01g28790	472.915	3804.44	2138.68	70.3254	132.681	101.503	305.865	443.171	374.518	2616.32	4639.24	3627.78	4458.77	4554.12	4506.45	1450.84	4979.12	3214.98	1562.5	3092.13	0.98474	0.0139846	5.18706e-10	NA
LOC_Os01g31370	36.717	620.53	328.623	3.12557	14.5272	8.82636	25.836	74.1191	49.9776	114.333	255.77	185.051	133.988	480.035	307.012	26.3164	490.716	258.516	56.7193	322.616	2.50791	0.00112	0.00502102	NA
LOC_Os01g32830	3256.06	495.67	1875.87	632.928	479.396	556.162	1201.79	219.269	710.529	2513.42	508.592	1511	519.326	76.9477	298.137	495.435	363.319	429.377	1436.49	357.199	-2.00775	0.000484374	0.0423595	NA
LOC_Os01g33160	741.683	49.5132	395.598	185.971	70.6988	128.335	85.0087	1.54415	43.2764	363.007	8.84508	185.926	22.4944	1.77572	12.135	34.3258	14.1553	24.2405	238.748	24.422	-3.28924	8.53606e-05	0.00284591	NA
LOC_Os01g33869	17.6242	185.675	101.649	1.56279	2.90543	2.23411	0	0	0	0	5.89672	2.94836	0	0.591905	0.295953	0	20.0533	10.0267	3.19782	35.8536	3.48696	0.0129019	0.000102006	NA
LOC_Os01g36350	353.952	3.76731	178.86	0	0	0	45.0046	3.0883	24.0464	249.627	0	124.813	0.978016	0	0.489008	0	0	0	108.26	1.1426	-6.56604	5.05487e-05	5.4621e-06	NA
LOC_Os01g38980	969.328	2561.23	1765.28	196.911	452.279	324.595	466.714	838.473	652.594	4294.15	2178.84	3236.49	1336.95	4143.34	2740.14	869.586	4176.99	2523.29	1355.61	2391.86	0.819193	0.0226909	0.000194645	NA
LOC_Os01g40260	1.46868	138.314	69.8914	0	0.968477	0.484238	1.66684	3.0883	2.37757	3.81109	5.15963	4.48536	33.2525	170.469	101.861	5.72096	103.805	54.7632	7.65335	70.3007	3.19938	0.0191107	0.00358015	NA
LOC_Os01g41430	5.87472	114.096	59.9852	0	4.84238	2.42119	0.833418	268.682	134.758	20.0082	84.0282	52.0182	138.878	318.445	228.662	9.15354	55.4415	32.2975	29.1247	140.922	2.27459	0.000690923	0.00105546	NA
LOC_Os01g42234	403.887	1943.93	1173.91	181.283	352.526	266.904	138.347	548.173	343.26	359.196	432.672	395.934	978.016	1543.1	1260.56	417.63	1590.11	1003.87	413.06	1068.42	1.37105	0.0111565	0.0421705	NA
LOC_Os01g42320	19.0928	46.8223	32.9575	0	1.93695	0.968477	0.833418	4.63245	2.73293	0	9.58217	4.79108	0	9.47048	4.73524	3.43258	50.7231	27.0778	3.89314	20.5279	2.39858	0.00896292	0.0440753	NA
LOC_Os01g42520	2593.69	5426	4009.84	429.766	1510.82	970.295	1553.49	7665.16	4609.32	1044.24	2660.89	1852.57	3809.37	4504.99	4157.18	1242.59	10156.4	5699.5	1778.86	5320.71	1.58067	0.000357986	0.0165872	NA
LOC_Os01g42860	2.93736	604.922	303.93	3.12557	9.68477	6.40517	0.833418	165.224	83.0287	6.66941	103.93	55.2995	70.4171	1016.89	543.655	28.6048	158.067	93.336	18.7646	343.12	4.19263	6.46904e-07	0.000705167	NA
LOC_Os01g43210	0	0	0	0	0	0	25.836	0	12.918	0.952773	0	0.476387	0	0	0	0	0	0	4.46479	0	#NUM!	0.0411798	0.037191	NA
LOC_Os01g43270	14.6868	0	7.3434	135.962	24.2119	80.0871	2.50025	0	1.25013	163.877	1.47418	82.6756	23.4724	0	11.7362	3.43258	0	1.71629	57.3219	4.28102	-3.74306	5.06723e-05	0.000338201	NA
LOC_Os01g43844	487.602	3604.24	2045.92	85.9532	411.603	248.778	500.051	2042.91	1271.48	390.637	913.254	651.946	758.94	1899.42	1329.18	544.636	3020.97	1782.8	461.303	1982.07	2.10322	4.94084e-05	0.0222384	NA
LOC_Os01g44970	1852	254.562	1053.28	2103.51	1463.37	1783.44	1143.45	460.156	801.803	945.151	330.216	637.684	170.175	198.88	184.527	188.792	104.985	146.888	1067.18	468.695	-1.18708	0.0343891	0.000610868	NA
LOC_Os01g45250	83.7147	550.027	316.871	37.5069	30.0228	33.7648	3.33367	44.7803	24.057	324.896	120.883	222.889	53.7909	181.123	117.457	50.3445	457.687	254.016	92.2644	230.754	1.32251	0.0428638	0.0151153	NA
LOC_Os01g45720	11.7494	1452.03	731.889	3.12557	89.0999	46.1127	1.66684	296.477	149.072	13.3388	344.221	178.78	55.7469	576.516	316.131	4.57677	714.841	359.709	15.0341	578.864	5.26692	4.69957e-13	0.0114639	NA
LOC_Os01g45914	11463	1699.59	6581.32	20014.6	12857.5	16436	5133.86	2733.14	3933.5	17323.3	5062.33	11192.8	3078.79	347.448	1713.12	5503.56	2209.4	3856.48	10419.5	4151.57	-1.32756	9.21748e-05	1.24399e-05	NA
LOC_Os01g46120	1412.87	67.2734	740.071	909.541	378.674	644.108	945.93	30.883	488.406	1710.23	37.5916	873.91	278.734	8.87858	143.807	328.383	17.6941	173.039	930.948	90.1658	-3.36805	6.27686e-11	0.00048289	NA
LOC_Os01g46140	947.298	110.328	528.813	331.311	232.434	281.872	242.525	27.7947	135.16	440.181	48.6479	244.415	64.549	2.36762	33.4583	53.777	75.4948	64.6359	346.607	82.8446	-2.06482	0.00192715	0.0108897	NA
LOC_Os01g46260	108.682	0.538187	54.6102	18.7534	10.6532	14.7033	20.8355	1.54415	11.1898	65.7414	0	32.8707	0	0	0	1.14419	0	0.572096	35.8594	2.1226	-4.07845	0.00356495	0.0101232	NA
LOC_Os01g47560	475.852	1594.65	1035.25	126.586	303.133	214.859	165.85	265.594	215.722	232.477	384.761	308.619	484.118	2080.55	1282.33	91.5354	1742.28	916.907	262.736	1061.83	2.01486	0.00196072	0.0362653	NA
LOC_Os01g47730	258.488	1081.22	669.853	76.5765	139.461	108.019	173.351	335.08	254.216	860.354	692.864	776.609	434.239	670.629	552.434	290.625	1634.93	962.779	348.939	759.031	1.12118	0.0477575	0.0261861	NA
LOC_Os01g47760	315.766	4196.78	2256.27	223.478	241.151	232.315	265.027	1016.05	640.538	1578.75	2186.95	1882.85	3866.1	5038.89	4452.49	913.065	7258.12	4085.59	1193.7	3322.99	1.47705	0.00157906	2.69982e-06	NA
LOC_Os01g50370	36.717	986.497	511.607	12.5023	23.2434	17.8729	24.1691	49.4128	36.7909	627.878	709.08	668.479	533.997	516.141	525.069	232.271	1535.85	884.059	244.589	636.704	1.38026	0.0206739	5.39032e-07	NA
LOC_Os01g51670	85.1834	838.495	461.839	4.68836	9.68477	7.18656	39.1707	134.341	86.7558	10.4805	28.7465	19.6135	203.427	137.914	170.671	85.8144	749.05	417.432	71.4608	316.372	2.1464	0.0213489	9.84106e-05	NA
LOC_Os01g51690	2.93736	120.016	61.4765	0	0.968477	0.484238	0	7.72074	3.86037	5.71664	5.15963	5.43813	22.4944	26.6357	24.565	1.14419	35.3882	18.2662	5.38209	32.6481	2.60076	0.0325553	0.0497497	NA
LOC_Os01g52250	76995.5	64261.1	70628.3	7710.78	78655.8	43183.3	18091.8	55892	36991.9	24835.9	143330	84083	6739.51	27277.9	17008.7	6319.37	94912.3	50615.8	23448.8	77388.2	1.7226	3.83361e-05	0.021497	NA
LOC_Os01g54620	10264.6	2836.78	6550.69	2069.13	2031.86	2050.5	2900.3	830.752	1865.52	7115.31	2380.06	4747.69	1949.19	526.796	1237.99	855.856	2046.62	1451.24	4192.4	1775.48	-1.23957	0.0274141	0.0125149	NA
LOC_Os01g54670	195.334	769.607	482.471	45.3208	92.9738	69.1473	88.3423	541.996	315.169	491.631	1040.77	766.201	505.634	670.037	587.835	478.272	898.86	688.566	300.756	669.041	1.1535	0.0194622	0.015646	NA
LOC_Os01g55240	85.1834	1582.27	833.727	57.8231	113.312	85.5674	149.182	186.842	168.012	66.6941	367.808	217.251	1366.29	2744.07	2055.18	470.263	1821.31	1145.79	365.906	1135.94	1.63434	0.00144091	6.46583e-07	NA
LOC_Os01g55510	337.796	2585.99	1461.89	142.213	285.701	213.957	232.524	1852.98	1042.75	1498.71	1743.95	1621.33	1041.59	1878.71	1460.15	763.176	5675.09	3219.13	669.335	2337.07	1.8039	0.000341842	0.00249635	NA
LOC_Os01g56690	0	284.701	142.35	0	0	0	0	0	0	4.76387	3.68545	4.22466	40.0986	118.381	79.2398	8.00935	110.883	59.4462	8.81198	86.2751	3.29141	0.0405021	1.75487e-05	NA
LOC_Os01g56810	102.808	1100.59	601.7	20.3162	401.918	211.117	25.0025	943.475	484.239	121.955	944.949	533.452	706.127	1037.02	871.573	216.252	1586.57	901.411	198.744	1002.42	2.33451	1.21919e-07	0.00686922	NA
LOC_Os01g57730	39.6543	610.842	325.248	7.81393	42.613	25.2135	15.0015	134.341	74.6712	226.76	288.939	257.85	164.307	477.667	320.987	21.7397	846.957	434.348	79.2127	400.227	2.33701	0.000208272	0.00630911	NA
LOC_Os01g58020	71.9653	27.4475	49.7064	50.0091	23.2434	36.6263	1057.61	29.3388	543.473	2561.05	390.658	1475.86	11.7362	25.4519	18.5941	30.8932	41.2862	36.0897	630.544	89.5709	-2.8155	0.0443658	5.38762e-09	NA
LOC_Os01g58039	227.645	27.4475	127.546	150.027	43.5815	96.8044	1270.13	41.692	655.911	12710	1132.91	6921.45	39.1206	24.86	31.9903	110.987	77.854	94.4203	2417.98	224.724	-3.42758	1.32155e-05	0	NA
LOC_Os01g58140	230.583	413.328	321.955	34.3813	99.7531	67.0672	53.3388	193.019	123.179	809.857	763.625	786.741	59.659	1083.78	571.719	73.2283	913.015	493.122	210.175	577.753	1.45886	0.00233926	0.00208025	NA
LOC_Os01g58890	1819.69	5161.75	3490.72	242.232	1289.04	765.637	461.714	3214.92	1838.32	1696.89	5017.37	3357.13	1923.76	3076.13	2499.94	740.292	3794.79	2267.54	1147.43	3592.33	1.64652	5.58128e-05	0.0330301	NA
LOC_Os01g59420	8.81208	34.9822	21.8971	70.3254	123.965	97.1452	2.50025	21.6181	12.0592	8.57496	185.01	96.7922	2.93405	15.3895	9.16179	1.14419	18.8737	10.0089	15.7151	66.6397	2.08423	0.00880978	0.0320999	NA
LOC_Os01g59680	1.46868	75.3462	38.4074	1.56279	2.90543	2.23411	0	33.9713	16.9856	0.952773	11.0563	6.00456	78.2413	115.422	96.8314	22.8838	368.037	195.46	17.5182	101.123	2.52918	0.00156324	0.000364984	NA
LOC_Os01g59690	772.525	2982.09	1877.31	421.952	557.843	489.897	311.698	671.705	491.702	1821.7	2078.59	1950.15	2180.98	3450.22	2815.6	1091.56	3850.23	2470.9	1100.07	2265.11	1.04199	0.0312916	0.00463927	NA
LOC_Os01g59819	1625.83	147.463	886.646	706.379	378.674	542.527	256.693	13.8973	135.295	1114.74	56.7559	585.75	82.1533	5.91905	44.0362	102.977	76.6744	89.8258	648.129	113.231	-2.51702	2.09012e-05	7.84877e-05	NA
LOC_Os01g61044	82.246	159.842	121.044	9.37671	26.1489	17.7628	81.675	1419.07	750.374	121.955	428.249	275.102	206.361	742.841	474.601	118.996	146.271	132.634	103.435	487.071	2.23541	0.00981605	0.00300143	NA
LOC_Os01g62430	16.1555	559.176	287.666	1.56279	22.275	11.9189	4.16709	78.7516	41.4593	161.019	42.0141	101.516	185.823	455.175	320.499	61.7864	293.722	177.754	71.7522	241.852	1.75303	0.0042692	0.00239701	NA
LOC_Os01g62480	2683.28	278.781	1481.03	378.194	259.552	318.873	740.909	77.2074	409.058	962.301	90.662	526.481	271.888	26.6357	149.262	109.842	46.0046	77.9235	857.735	129.807	-2.72416	2.78298e-05	0.00190904	NA
LOC_Os01g62670	22.0302	582.318	302.174	1.56279	17.4326	9.49768	7.50076	72.575	40.0379	88.6079	188.695	138.651	139.856	483.587	311.721	26.3164	267.771	147.044	47.6457	268.73	2.49574	0.000317392	0.00219127	NA
LOC_Os01g62760	1107.38	696.952	902.168	1247.1	430.004	838.553	586.727	109.635	348.181	484.962	62.6526	273.807	2445.04	604.927	1524.98	3223.19	212.329	1717.76	1515.73	352.75	-2.1033	2.86331e-05	0.0100907	NA
LOC_Os01g63190	2129.58	741.622	1435.6	262.548	255.678	259.113	465.047	268.682	366.865	3788.23	323.582	2055.9	903.687	294.177	598.932	924.507	1436.76	1180.63	1412.27	553.417	-1.35157	0.0370334	0.0121192	NA
LOC_Os01g64110	86.6521	1621.02	853.836	6.25114	57.1401	31.6956	18.3352	382.949	200.642	89.5607	225.549	157.555	614.194	3321.18	1967.69	100.689	402.246	251.467	152.614	1001.68	2.71447	1.36734e-06	1.90586e-08	NA
LOC_Os01g64660	8422.88	1845.98	5134.43	1293.99	2330.16	1812.07	1851.02	211.548	1031.29	5317.43	709.817	3013.62	519.326	70.4367	294.882	779.195	639.347	709.271	3030.64	967.881	-1.64672	0.000365633	5.04992e-06	NA
LOC_Os01g64730	895.894	3814.13	2355.01	273.487	295.385	284.436	695.904	1439.15	1067.53	1127.13	3448.84	2287.99	851.852	2265.81	1558.83	544.636	2299.05	1421.84	731.484	2260.4	1.62768	0.00369039	0.0463504	NA
LOC_Os01g65100	3637.92	1122.12	2380.02	6219.89	3994	5106.94	1895.19	1715.55	1805.37	9591.57	3111.26	6351.41	1138.41	202.432	670.421	1637.34	1564.16	1600.75	4020.05	1951.59	-1.04257	0.0159219	0.000327292	NA
LOC_Os01g65210	3657.01	349.283	2003.15	876.723	401.918	639.32	655.067	120.444	387.755	2757.33	196.803	1477.06	196.581	52.0877	124.334	125.861	140.373	133.117	1378.09	210.151	-2.71317	0.00018156	0.000607437	NA
LOC_Os01g65830	55.8098	2968.64	1512.22	28.1301	511.356	269.743	60.0061	4913.48	2486.74	86.7024	8405.03	4245.87	141.812	1487.46	814.635	102.977	3046.92	1574.95	79.2397	3555.48	5.48768	0	0.037585	NA
LOC_Os01g65902	353.952	33.3676	193.66	43.758	18.4011	31.0795	320.033	30.883	175.458	1123.32	124.568	623.944	25.4284	34.3305	29.8795	56.0654	41.2862	48.6758	320.426	47.1394	-2.76499	0.0139791	0.0164474	NA
LOC_Os01g65950	11.7494	392.877	202.313	12.5023	30.0228	21.2625	10.001	33.9713	21.9861	20.0082	53.0705	36.5393	233.746	725.084	479.415	30.8932	281.926	156.41	53.15	252.825	2.25	0.00335327	0.000755052	NA
LOC_Os01g66120	1461.34	16484.7	8973	531.347	941.359	736.353	585.893	2510.79	1548.34	3058.4	4279.54	3668.97	9728.32	9304.75	9516.54	6124.86	18764	12444.4	3581.69	8714.18	1.28272	0.0023524	1.67223e-07	NA
LOC_Os01g66830	1039.82	128.089	583.957	2820.83	1598.96	2209.89	1648.5	393.758	1021.13	1834.09	383.287	1108.69	845.006	231.435	538.22	845.558	218.227	531.893	1505.63	492.292	-1.61279	9.92799e-05	0.011065	NA
LOC_Os01g66900	1.46868	85.0335	43.2511	0	0	0	0	3.0883	1.54415	0	2.21127	1.10563	1.95603	15.9814	8.96874	1.14419	1.17961	1.1619	0.761484	17.9157	4.55627	0.0264415	0.0389694	NA
LOC_Os01g67010	4.40604	1296.49	650.449	1.56279	73.6042	37.5835	1.66684	883.253	442.46	2.85832	614.733	308.796	75.3072	1078.45	576.879	4.57677	1639.65	822.115	15.063	931.031	5.94975	0	7.65621e-05	NA
LOC_Os01g67090	4077.05	1609.18	2843.12	1681.56	1243.52	1462.54	465.881	142.062	303.971	2622.98	403.188	1513.09	576.051	207.167	391.609	348.979	877.627	613.303	1628.75	747.124	-1.12435	0.0331778	0.000700043	NA
LOC_Os01g67810	127.775	1320.17	723.974	21.879	50.3608	36.1199	45.838	128.164	87.0012	1795.02	565.348	1180.19	452.821	970.724	711.773	162.475	2220.02	1191.25	434.302	875.798	1.0119	0.00767832	1.47316e-07	NA
LOC_Os01g67820	7.3434	491.365	249.354	1.56279	5.81086	3.68682	5.83393	43.2362	24.535	309.651	204.174	256.913	397.074	338.57	367.822	42.3351	805.671	424.003	127.3	314.804	1.30622	0.00713464	2.14304e-06	NA
LOC_Os01g68510	129.244	7.53462	68.3892	1.56279	5.81086	3.68682	0.833418	0	0.416709	97.1829	0.73709	48.96	4.89008	1.77572	3.3329	4.57677	0	2.28838	39.7149	2.64305	-3.90941	0.0313701	0.0314992	NA
LOC_Os01g68720	23.4989	392.338	207.919	1.56279	161.736	81.6492	10.001	609.939	309.97	25.7249	1409.32	717.52	5.86809	329.691	167.78	2.28838	346.804	174.546	11.4907	541.637	5.55879	1.03917e-13	0.0478319	NA
LOC_Os01g68730	5.87472	107.637	56.7561	0	58.1086	29.0543	0	18.5298	9.26489	43.8276	158.474	101.151	3.91206	58.5986	31.2553	1.14419	58.9803	30.0622	9.12642	76.7215	3.07151	4.92645e-05	0.0383864	NA
LOC_Os01g70830	1722.76	85.5717	904.166	490.715	317.66	404.188	335.034	77.2074	206.121	785.085	79.6057	432.345	44.9887	34.3305	39.6596	32.0374	55.4415	43.7394	568.437	108.303	-2.39193	0.0164157	0.00424363	NA
LOC_Os01g71380	1.46868	0	0.73434	179.72	5.81086	92.7656	0	0	0	0	0	0	0.978016	0	0.489008	0	0	0	30.3612	0.968477	-4.97037	0.0220044	3.19666e-06	NA
LOC_Os01g71830	33.7796	454.23	244.005	45.3208	88.1314	66.7261	0	206.916	103.458	0	0.73709	0.368545	40.0986	137.914	89.0063	16.0187	187.557	101.788	22.5363	179.248	2.99163	0.000823037	0.00168504	NA
LOC_Os01g72610	489.07	890.699	689.885	42.1952	276.984	159.59	106.678	1463.85	785.265	133.388	1640.76	887.075	48.9008	790.785	419.843	40.0467	1135.96	588.004	143.38	1033.17	2.84917	4.00582e-08	0.0303413	NA
LOC_Os01g73200	190.928	517.198	354.063	1.56279	4.84238	3.20258	15.8349	528.099	271.967	46.6859	608.836	327.761	247.438	713.246	480.342	34.3258	227.664	130.995	89.4626	433.314	2.27606	0.000205091	3.9408e-05	NA
LOC_Os01g73770	0	132.394	66.197	0	0	0	0	0	0	9.52773	19.1643	14.346	27.3844	91.7453	59.5649	10.2977	368.037	189.167	7.86832	101.89	3.69482	0.00860565	2.19106e-05	NA
LOC_Os01g73980	1177.88	284.701	731.291	573.542	430.004	501.773	303.364	177.577	240.471	1948.42	377.39	1162.91	201.471	58.0067	129.739	155.61	228.844	192.227	726.715	259.42	-1.4861	0.0459629	0.0224332	NA
LOC_Os01g74040	124.838	700.181	412.51	65.637	55.2032	60.4201	147.515	199.195	173.355	843.204	1804.4	1323.8	299.273	1070.16	684.719	135.015	813.928	474.471	269.247	773.845	1.52311	0.0165944	0.000825604	NA
LOC_Os01g74370	7.3434	1070.99	539.168	9.37671	8.71629	9.0465	9.1676	27.7947	18.4811	13.3388	86.9766	50.1577	347.196	1744.94	1046.07	24.028	475.381	249.705	68.4084	569.133	3.05652	7.66458e-05	1.05508e-08	NA
LOC_Os01g74410	571.316	5055.73	2813.52	106.269	947.17	526.72	50.8385	2201.96	1126.4	247.721	6824.71	3536.22	103.67	2255.75	1179.71	52.6328	5292.89	2672.76	188.741	3763.04	4.31741	0	0.00416145	NA
LOC_Os02g01150	11473.3	1831.99	6652.66	3750.69	2641.04	3195.86	6199.8	1352.67	3776.24	10637.7	1586.22	6111.97	1886.59	551.064	1218.83	2199.14	1020.36	1609.75	6024.54	1497.22	-2.00856	5.51794e-05	0.0329407	NA
LOC_Os02g01340	12046.1	3028.92	7537.51	1801.89	1878.85	1840.37	3434.52	1303.26	2368.89	11527.6	3379.56	7453.58	1806.4	594.865	1200.63	1972.59	2153.96	2063.27	5431.52	2056.57	-1.40112	0.0138078	0.0021994	NA
LOC_Os02g03410	954.641	4745.73	2850.19	579.793	759.286	669.54	651.733	1337.23	994.483	1781.69	1477.86	1629.78	2108.6	4998.64	3553.62	922.219	7923.41	4422.82	1166.45	3540.36	1.60178	0.00701046	0.0283033	NA
LOC_Os02g03670	1661.08	253.486	957.281	1314.3	768.002	1041.15	1080.11	690.235	885.172	1716.9	373.704	1045.3	248.416	111.87	180.143	392.458	244.178	318.318	1068.88	406.913	-1.3933	0.0112133	0.0474333	NA
LOC_Os02g04130	155.68	2277.61	1216.64	35.9441	44.5499	40.247	72.5074	118.899	95.7034	953.726	1798.5	1376.11	1601.01	1594	1597.51	281.471	2254.23	1267.85	516.723	1347.96	1.38332	0.0104241	2.62355e-08	NA
LOC_Os02g04760	279.049	0.538187	139.794	56.2603	11.6217	33.941	34.1702	0	17.0851	220.091	0	110.045	2.93405	0.591905	1.76298	1.14419	0	0.572096	98.9414	2.1253	-5.54083	2.77445e-05	0.00545633	NA
LOC_Os02g05000	126.306	4.84368	65.575	714.193	486.175	600.184	15.8349	0	7.91747	11.4333	0.73709	6.08518	142.79	126.076	134.433	5.72096	1.17961	3.45028	169.38	103.169	-0.715258	0.00552821	3.23756e-10	NA
LOC_Os02g05980	274.643	248.642	261.643	0	21.3065	10.6532	53.3388	172.945	113.142	40.0165	28.7465	34.3815	30.3185	95.8886	63.1036	34.3258	428.197	231.261	72.1071	165.954	1.20257	0.0478675	0.00767456	NA
LOC_Os02g06930	142.462	1278.73	710.597	73.4509	147.208	110.33	91.676	338.169	214.922	1169.05	605.888	887.47	557.469	1908.89	1233.18	291.769	1846.08	1068.93	387.647	1020.83	1.39693	0.0036551	0.000950706	NA
LOC_Os02g09990	10.2808	157.151	83.7157	0	1.93695	0.968477	16.6684	15.4415	16.0549	9.52773	15.4789	12.5033	40.0986	302.464	171.281	49.2003	213.509	131.354	20.9626	117.663	2.48877	0.0369421	0.00339477	NA
LOC_Os02g10350	1693.39	71.0407	882.214	73.4509	87.1629	80.3069	399.207	16.9856	208.097	549.75	31.6949	290.723	48.9008	17.1652	33.033	54.9212	41.2862	48.1037	469.936	44.2226	-3.40961	0.00114047	0.0275288	NA
LOC_Os02g11859	51.4038	1278.19	664.799	4.68836	52.2977	28.4931	8.33418	97.2814	52.8078	435.417	329.479	382.448	240.592	1367.89	804.242	36.6142	890.603	463.608	129.508	669.291	2.36959	4.70017e-06	2.49691e-06	NA
LOC_Os02g11970	2.93736	23.142	13.0397	0	0	0	0	54.0452	27.0226	4.76387	5.89672	5.33029	5.86809	320.221	163.044	0	0	0	2.26155	67.2174	4.89345	0.00878753	0.000334365	NA
LOC_Os02g12150	27.9049	95.2591	61.582	0	0	0	19.1686	89.5606	54.3646	18.1027	234.395	126.249	8.80214	58.5986	33.7004	0	0	0	12.3297	79.6355	2.69127	0.0276029	5.83659e-05	NA
LOC_Os02g12380	44.0604	420.324	232.192	18.7534	20.338	19.5457	20.8355	872.444	446.64	45.7331	921.362	483.548	51.8348	1765.06	908.448	14.8745	192.276	103.575	32.682	698.634	4.41797	8.39843e-08	0.0403923	NA
LOC_Os02g12790	895.894	23.142	459.518	1714.38	628.541	1171.46	842.586	58.6777	450.632	1243.37	50.1221	646.746	253.306	76.9477	165.127	567.519	174.582	371.051	919.508	168.669	-2.44667	9.12775e-07	0.0112092	NA
LOC_Os02g13370	10.2808	122.707	66.4937	4.68836	30.0228	17.3556	2.50025	106.546	54.5233	8.57496	183.535	96.0552	69.4391	488.914	279.176	11.4419	139.194	75.3177	17.8209	178.486	3.32417	2.98379e-05	0.0492067	NA
LOC_Os02g13660	1361.47	2787.27	2074.37	170.344	1936.95	1053.65	4726.32	19476.3	12101.3	917.521	14869.3	7893.42	5166.86	4397.86	4782.36	1487.45	4312.64	2900.04	2304.99	7963.4	1.78862	3.35093e-05	2.21328e-05	NA
LOC_Os02g14430	13.2181	174.373	93.7953	6.25114	9.68477	7.96796	5.83393	680.97	343.402	0	22.8498	11.4249	26.4064	687.202	356.804	9.15354	40.1066	24.6301	10.1439	269.198	4.72999	1.66273e-05	0.00383968	NA
LOC_Os02g15290	0	78.5753	39.2877	1.56279	7.74781	4.6553	1.66684	4.63245	3.14964	0.952773	4.42254	2.68766	18.5823	256.295	137.439	3.43258	54.2619	28.8472	4.36621	67.6558	3.95376	0.00309421	0.0206857	NA
LOC_Os02g15620	2.93736	0	1.46868	15.6279	3.87391	9.75088	1.66684	0	0.833418	0	0	0	0	0	0	5.72096	0	2.86048	4.3255	0.645651	-2.74404	0.0422276	0.0375869	NA
LOC_Os02g15690	1719.82	264.25	992.037	4911.84	2293.35	3602.59	2113.55	396.846	1255.2	1192.87	375.179	784.025	810.775	285.89	548.333	2296.39	402.246	1349.32	2174.21	669.627	-1.69906	5.26346e-05	0.00233308	NA
LOC_Os02g17920	2975.54	511.816	1743.68	1434.64	824.174	1129.41	1352.64	338.169	845.403	3640.55	768.785	2204.67	333.503	191.185	262.344	489.714	473.022	481.368	1704.43	517.858	-1.71866	0.00561547	0.029262	NA
LOC_Os02g18650	1.46868	199.667	100.568	0	8.71629	4.35815	15.0015	1083.99	549.497	2.85832	450.362	226.61	10.7582	1991.76	1001.26	5.72096	559.133	282.427	5.96794	715.605	6.90579	0	2.41343e-05	NA
LOC_Os02g20040	170.367	330.985	250.676	29.6929	82.3205	56.0067	174.184	1324.88	749.532	147.68	424.564	286.122	83.1313	316.077	199.604	11.4419	196.994	104.218	102.75	445.97	2.11781	0.00159787	0.0224415	NA
LOC_Os02g21040	61.6845	992.955	527.32	9.37671	30.0228	19.6997	35.837	67.9426	51.8898	316.321	257.981	287.151	389.25	815.645	602.448	61.7864	1292.85	677.317	145.709	576.233	1.98356	0.00495433	8.36927e-05	NA
LOC_Os02g24642	258.488	40.9022	149.695	15.6279	7.74781	11.6878	385.873	117.355	251.614	1811.22	251.348	1031.28	50.8568	60.3743	55.6156	115.563	94.3685	104.966	439.605	95.3493	-2.20491	0.0400444	3.48779e-05	NA
LOC_Os02g26770	7.3434	305.69	156.517	0	39.7075	19.8538	0	16.9856	8.49282	32.3943	67.8123	50.1033	114.428	208.351	161.389	4.57677	146.271	75.424	26.4571	130.803	2.30567	0.00019409	0.0030722	NA
LOC_Os02g27480	368.638	2178.58	1273.61	123.46	259.552	191.506	129.18	480.23	304.705	871.788	647.165	759.476	738.402	1954.47	1346.44	249.434	2486.61	1368.02	413.484	1334.43	1.69033	0.00225279	0.0114252	NA
LOC_Os02g27510	0	0.538187	0.269093	0	0	0	0	128.164	64.0822	0	84.0282	42.0141	0	19.5329	9.76643	0	1.17961	0.589803	0	38.9072	#DIV/0!	1.74833e-05	0.0107988	NA
LOC_Os02g28170	425.917	712.56	569.238	9.37671	32.9282	21.1525	153.349	1227.6	690.474	399.212	1492.61	945.909	191.691	617.949	404.82	13.7303	107.344	60.5372	198.879	698.498	1.81236	0.000759449	1.61917e-06	NA
LOC_Os02g28220	1.46868	197.515	99.4917	0	0.968477	0.484238	0.833418	186.842	93.8377	0.952773	16.216	8.58437	7.82413	126.668	67.2459	0	1.17961	0.589803	1.8465	88.2314	5.57843	3.73963e-05	0.00248486	NA
LOC_Os02g29040	33.7796	547.336	290.558	4.68836	63.9195	34.3039	2.50025	77.2074	39.8538	25.7249	678.86	352.292	69.4391	863.59	466.514	94.968	660.579	377.774	38.5167	481.915	3.64522	4.35123e-08	0.00110121	NA
LOC_Os02g29140	1.46868	34.9822	18.2254	21.879	52.2977	37.0884	0.833418	29.3388	15.0861	1.90555	62.6526	32.2791	24.4504	516.141	270.296	29.749	552.056	290.902	13.381	207.911	3.95771	1.08721e-05	0.00229024	NA
LOC_Os02g29630	10.2808	0	5.14038	0	0	0	0	0	0	102.9	0.73709	51.8183	0	0	0	0	0	0	18.8634	0.122848	-7.26257	0.00734818	0.000729832	NA
LOC_Os02g29640	114.557	4.84368	59.7003	0	0	0	9.1676	1.54415	5.35588	266.777	0.73709	133.757	1.95603	0	0.978016	0	0	0	65.4095	1.18749	-5.78352	0.00151167	7.98444e-05	NA
LOC_Os02g30080	299.611	11.3019	155.456	1367.44	364.147	865.792	680.903	6.1766	343.54	650.744	14.7418	332.743	274.822	1.77572	138.299	195.657	7.07764	101.367	578.196	67.5368	-3.09781	1.47794e-11	1.26106e-06	NA
LOC_Os02g31860	129.244	0.538187	64.891	96.8927	138.492	117.692	10.8344	1.54415	6.18929	173.405	3.68545	88.5451	5.86809	0	2.93405	2.28838	7.07764	4.68301	69.7554	25.2229	-1.46757	0.0164073	0.000684182	NA
LOC_Os02g32690	370.107	829.884	599.996	101.581	446.468	274.024	99.1768	3383.23	1741.2	683.138	2989.64	1836.39	238.636	712.654	475.645	94.968	721.919	408.443	264.601	1513.97	2.51644	8.99125e-06	0.0130336	NA
LOC_Os02g33070	187.991	4386.76	2287.38	118.772	591.739	355.256	101.677	1141.13	621.402	487.82	2788.41	1638.12	1110.05	3376.23	2243.14	838.693	6192.93	3515.81	474.167	3079.53	2.69925	1.1068e-08	0.000384989	NA
LOC_Os02g33380	107.214	1.61456	54.4141	459.459	18.4011	238.93	35.837	0	17.9185	182.932	1.47418	92.2033	33.2525	1.18381	17.2182	41.1909	1.17961	21.1853	143.314	3.97554	-5.17189	7.88474e-08	0.0160552	NA
LOC_Os02g33590	0	70.5025	35.2512	0	2.90543	1.45272	1.66684	1.54415	1.60549	42.8748	34.6432	38.759	18.5823	73.9881	46.2852	1.14419	77.854	39.4991	10.7114	43.5729	2.02429	0.0349127	0.0385067	NA
LOC_Os02g34410	86.6521	2293.75	1190.2	21.879	43.5815	32.7302	55.839	231.622	143.731	385.873	1043.72	714.796	1187.31	3018.72	2103.01	369.574	4148.67	2259.12	351.188	1796.68	2.35502	2.27285e-05	3.01071e-09	NA
LOC_Os02g36220	52.8725	0	26.4362	79.7021	36.8021	58.2521	20.002	0	10.001	305.84	0.73709	153.289	26.4064	0	13.2032	46.9119	2.35921	24.6355	88.6225	6.64974	-3.7363	3.78228e-06	0.00489405	NA
LOC_Os02g36340	1857.88	5731.15	3794.52	690.751	1018.84	854.794	813.416	1678.49	1245.95	2346.68	1895.79	2121.24	3401.54	6361.2	4881.37	1343.28	5020.4	3181.84	1742.26	3617.65	1.05409	0.034583	0.0182971	NA
LOC_Os02g36550	3078.35	711.483	1894.92	1270.54	860.007	1065.28	1138.45	163.68	651.065	2683.01	190.906	1436.96	446.953	79.3153	263.134	288.336	659.4	473.868	1484.27	444.132	-1.7407	0.0010515	0.0231869	NA
LOC_Os02g36590	3068.07	590.391	1829.23	1622.17	826.111	1224.14	565.891	40.1479	303.019	964.207	60.4414	512.324	278.734	27.2276	152.981	175.061	257.154	216.108	1112.36	300.245	-1.8894	6.43221e-05	2.83903e-05	NA
LOC_Os02g36940	271.706	1044.08	657.894	50.0091	527.82	288.914	85.0087	765.898	425.453	396.354	1159.44	777.898	1639.15	960.07	1299.61	157.899	1821.31	989.605	433.355	1046.44	1.27186	0.000135768	0.00657076	NA
LOC_Os02g37190	7.3434	151.769	79.5561	1.56279	217.907	109.735	0	6.1766	3.0883	1.90555	253.559	127.732	0	15.9814	7.99072	0	64.8783	32.4392	1.80195	118.379	6.0377	5.4149e-08	0.0183598	NA
LOC_Os02g37320	5.87472	98.4882	52.1815	0	8.71629	4.35815	0	4.63245	2.31622	26.6777	25.7981	26.2379	44.9887	92.3372	68.663	3.43258	79.0336	41.2331	13.4956	51.501	1.93211	0.0115206	0.0266253	NA
LOC_Os02g37690	5890.87	746.465	3318.67	523.533	892.936	708.234	644.232	154.415	399.324	1652.11	232.92	942.515	262.108	29.5953	145.852	204.81	147.451	176.131	1529.61	367.297	-2.05815	0.000870206	1.55366e-06	NA
LOC_Os02g37750	36.717	0	18.3585	23.4418	34.8652	29.1535	7.50076	0	3.75038	3.81109	0	1.90555	0	0	0	2.28838	0	1.14419	12.2932	5.81086	-1.08103	0.014969	0.0015879	NA
LOC_Os02g39140	793.087	3275.41	2034.25	275.05	1037.24	656.144	26.6694	531.187	278.928	603.105	1350.35	976.727	1343.79	1169.6	1256.7	995.447	4250.12	2622.78	672.859	1935.65	1.52444	0.000363329	0.00104946	NA
LOC_Os02g39330	13.2181	926.758	469.988	4.68836	30.9913	17.8398	4.16709	180.665	92.4163	14.2916	222.601	118.446	295.361	526.204	410.782	94.968	527.284	311.126	71.1156	402.417	2.50045	5.73333e-06	0.000130775	NA
LOC_Os02g41510	7.3434	513.43	260.387	1.56279	15.4956	8.52921	1.66684	24.7064	13.1866	194.366	448.888	321.627	320.789	580.067	450.428	26.3164	916.554	471.435	92.0074	416.524	2.17858	3.28189e-05	1.42418e-07	NA
LOC_Os02g42640	1.46868	185.675	93.5716	1.56279	2.90543	2.23411	2.50025	12.3532	7.42672	4.76387	17.6902	11.227	10.7582	87.0101	48.8841	4.57677	568.57	286.573	4.27175	145.701	5.09203	0.000721591	0.0416219	NA
LOC_Os02g42850	138.056	1362.15	750.104	73.4509	188.853	131.152	130.013	1121.05	625.533	224.854	978.855	601.855	677.765	1814.19	1245.98	97.2563	1427.32	762.29	223.566	1148.74	2.36128	6.97694e-06	0.0293189	NA
LOC_Os02g42950	23.4989	245.951	134.725	170.344	421.287	295.816	285.862	773.619	529.741	17.1499	280.831	148.991	630.82	2300.14	1465.48	779.195	662.939	721.067	317.812	780.795	1.29677	0.00120077	0.000111828	NA
LOC_Os02g43100	7.3434	0.538187	3.94079	21.879	6.77934	14.3292	33.3367	0	16.6684	20.961	0	10.4805	0	0	0	0	0	0	13.92	1.21959	-3.5127	0.0121545	0.0219355	NA
LOC_Os02g43170	237.926	985.42	611.673	60.9486	73.6042	67.2764	134.18	443.171	288.676	441.134	519.648	480.391	183.867	975.46	579.663	100.689	2170.48	1135.58	193.124	861.296	2.15698	0.00241218	0.049264	NA
LOC_Os02g43360	61.6845	2026.81	1044.25	21.879	258.583	140.231	46.6714	1045.39	546.03	1018.51	3490.12	2254.32	148.658	777.171	462.915	57.2096	3442.09	1749.65	225.77	1840.03	3.0268	3.26154e-11	1.15562e-06	NA
LOC_Os02g43790	30.8423	774.451	402.647	3.12557	19.3695	11.2476	5.83393	67.9426	36.8882	416.362	134.887	275.625	466.514	503.119	484.816	93.8238	390.45	242.137	169.417	315.037	0.894942	0.0153576	2.7362e-05	NA
LOC_Os02g44320	31197.7	4866.29	18032	40493.3	28843.2	34668.3	33710.9	5881.66	19796.3	20753.3	4900.91	12827.1	9773.31	2306.65	6039.98	9574.6	8312.68	8943.64	24250.5	9185.23	-1.40063	0.000234891	0.00383011	NA
LOC_Os02g45040	212.958	765.84	489.399	7.81393	4.84238	6.32816	418.376	535.82	477.098	54.3081	785.001	419.654	436.195	1189.14	812.666	294.057	1198.48	746.269	237.285	746.52	1.65356	0.0107756	1.23887e-05	NA
LOC_Os02g45710	709.372	1315.33	1012.35	82.8276	234.371	158.6	397.541	809.134	603.337	2017.97	2596.03	2307	819.577	1277.33	1048.45	295.202	1110.01	702.605	720.415	1223.7	0.76435	0.0358559	0.000800339	NA
LOC_Os02g45780	116.026	1156.03	636.026	15.6279	133.65	74.6388	71.674	566.703	319.188	324.896	1232.41	778.655	511.502	1311.07	911.286	65.219	934.248	499.734	184.157	889.018	2.27127	3.04066e-06	0.00139799	NA
LOC_Os02g48320	111.62	1293.26	702.441	67.1998	165.61	116.405	52.5054	656.263	354.384	388.731	806.376	597.554	543.777	2394.26	1469.02	296.346	2082	1189.18	243.363	1232.96	2.34095	1.49175e-05	0.00365334	NA
LOC_Os02g49510	41.123	4.3055	22.7143	43.758	35.8336	39.7958	218.356	29.3388	123.847	727.919	44.9625	386.441	10.7582	7.10286	8.93052	9.15354	3.53882	6.34618	175.178	20.847	-3.07091	0.0187476	0.00175181	NA
LOC_Os02g49720	894.426	10116.8	5505.63	631.365	3490.39	2060.88	552.556	3982.36	2267.46	799.377	13119.5	6959.42	3250.92	10241.7	6746.33	2955.45	27535.5	15245.5	1514.02	11414.4	2.9144	1.29242e-10	0.000778305	NA
LOC_Os02g50140	392.137	776.066	584.101	0	2.90543	1.45272	2.50025	1.54415	2.0222	0	2.94836	1.47418	18.5823	191.185	104.884	0	3.53882	1.76941	68.87	163.031	1.2432	0.0205646	1.39888e-14	NA
LOC_Os02g52010	199.74	2079.55	1139.65	32.8185	61.014	46.9163	165.017	622.292	393.654	1309.11	1297.28	1303.19	1303.7	3656.79	2480.24	307.788	3055.18	1681.48	553.028	1795.35	1.69884	0.000511409	3.72067e-07	NA
LOC_Os02g52210	60.2158	253.486	156.851	3.12557	20.338	11.7318	17.5018	26.2505	21.8762	321.085	150.366	235.725	168.219	498.384	333.301	105.266	773.822	439.544	112.569	287.108	1.35079	0.0491992	0.000243764	NA
LOC_Os02g52450	1906.35	315.378	1110.86	1031.44	754.443	892.941	980.1	291.844	635.972	2076.09	454.047	1265.07	171.153	87.0101	129.081	136.159	175.761	155.96	1050.21	346.414	-1.60012	0.0194477	0.00425781	NA
LOC_Os02g53180	2150.15	5347.43	3748.79	401.636	943.296	672.466	810.083	5392.17	3101.13	668.847	605.151	636.999	2009.82	2258.71	2134.27	692.236	1540.57	1116.4	1122.13	2681.22	1.25665	0.0253842	0.00599091	NA
LOC_Os02g53620	304.017	19.9129	161.965	511.031	189.821	350.426	375.038	9.26489	192.152	275.351	16.9531	146.152	118.34	5.91905	62.1295	131.582	20.0533	75.8177	285.893	43.6541	-2.71129	6.96834e-06	0.0305896	NA
LOC_Os02g54130	274.643	1379.37	827.008	103.144	259.552	181.348	263.36	265.594	264.477	1607.33	1536.83	1572.08	1001.49	1640.17	1320.83	711.688	2681.24	1696.47	660.275	1293.79	0.970469	0.0443026	0.000652264	NA
LOC_Os02g54870	46.9977	1069.92	558.457	26.5674	475.522	251.045	91.676	1253.85	672.762	42.8748	710.554	376.715	1004.42	1375.59	1190	280.327	1143.04	711.683	248.811	1004.74	2.01371	1.48324e-07	0.000860212	NA
LOC_Os02g55560	389.2	3048.83	1719.01	195.348	309.913	252.63	235.857	433.906	334.882	543.081	359.7	451.39	843.05	2141.51	1492.28	627.017	2873.52	1750.27	472.259	1527.9	1.6939	0.0175752	0.0109406	NA
LOC_Os02g55890	48.4664	6717.65	3383.06	50.0091	995.594	522.802	73.3408	6448.37	3260.85	80.033	9641.87	4860.95	351.108	39258.7	19804.9	200.234	14000.7	7100.49	133.865	12843.8	6.58415	0	4.69935e-06	NA
LOC_Os02g55970	257.019	1689.91	973.463	34.3813	112.343	73.3623	90.8426	558.982	324.912	511.639	532.179	521.909	496.832	1302.78	899.808	49.2003	894.141	471.671	239.986	848.389	1.82178	0.000387499	0.00382823	NA
LOC_Os02g56380	167.429	1763.1	965.265	25.0046	222.75	123.877	49.1717	276.403	162.787	443.04	852.813	647.926	497.81	1627.15	1062.48	137.303	1255.1	696.202	219.96	999.552	2.18404	1.40178e-05	0.00116106	NA
LOC_Os02g56460	1.46868	380.498	190.983	0	0.968477	0.484238	0	63.3101	31.6551	0	222.601	111.301	0.978016	514.366	257.672	4.57677	99.0869	51.8318	1.17058	213.472	7.51068	1.1596e-10	0.00821383	NA
LOC_Os02g56680	0	329.909	164.954	1.56279	5.81086	3.68682	0	77.2074	38.6037	0	0	0	0	736.922	368.461	1.14419	314.955	158.05	0.451163	244.134	9.07981	3.00194e-10	0.00100768	NA
LOC_Os02g56700	7.3434	1077.99	542.666	0	3.87391	1.93695	7.50076	1922.47	964.983	1.90555	3274.89	1638.4	19.5603	2719.21	1369.39	1.14419	17.6941	9.41914	6.24237	1502.69	7.91124	0	1.74965e-10	NA
LOC_Os02g56860	145.399	1398.21	771.805	246.92	885.188	566.054	202.521	1730.99	966.756	115.286	2366.8	1241.04	1156.01	2602.61	1879.31	447.379	6346.28	3396.83	385.587	2555.01	2.7282	1.96842e-08	0.00889797	NA
LOC_Os02g57810	0	170.067	85.0335	0	0	0	0	0	0	0	0.73709	0.368545	5.86809	8.87858	7.37334	3.43258	76.6744	40.0535	1.55011	42.7262	4.78468	0.0209739	0.000535442	NA
LOC_Os02g58720	5491.39	1385.29	3438.34	2137.89	921.99	1529.94	3174.49	827.664	2001.08	3490.01	698.761	2094.38	580.941	398.944	489.943	296.346	799.773	548.059	2528.51	838.738	-1.592	0.0193887	0.0375449	NA
LOC_Os03g01300	1254.25	471.99	863.121	503.217	187.885	345.551	287.529	35.5154	161.522	735.541	185.747	460.644	135.944	54.4553	95.1997	160.187	176.941	168.564	512.778	185.422	-1.46752	0.0152915	0.0220844	NA
LOC_Os03g01740	364.232	7409.22	3886.73	93.7671	96.8477	95.3074	356.703	818.399	587.551	1866.48	3538.03	2702.26	3870.01	3611.21	3740.61	1045.79	3062.26	2054.02	1266.16	3089.33	1.28683	0.0126886	5.59272e-08	NA
LOC_Os03g01800	3123.88	516.66	1820.27	795.458	657.596	726.527	763.411	196.107	479.759	371.582	111.301	241.441	963.346	14.7976	489.072	326.095	31.8494	178.972	1057.3	254.718	-2.0534	2.09687e-05	0.000516018	NA
LOC_Os03g01820	302.548	204.511	253.529	23.4418	265.363	144.402	100.844	663.984	382.414	63.8358	754.78	409.308	24.4504	128.443	76.4469	9.15354	165.145	87.1492	87.3788	363.704	2.05741	0.000270495	0.0337604	NA
LOC_Os03g02590	9017.69	1739.42	5378.56	3208.4	2357.27	2782.84	3920.4	1244.58	2582.49	9410.54	1862.63	5636.58	1356.51	374.084	865.296	1922.24	1179.61	1550.92	4805.96	1459.6	-1.71925	0.000581613	0.0138481	NA
LOC_Os03g03000	157.149	5.38187	81.2653	484.464	186.916	335.69	143.348	10.809	77.0785	79.0802	19.1643	49.1223	131.054	8.87858	69.9663	101.833	20.0533	60.9432	182.821	41.8672	-2.12654	0.00042023	0.0279893	NA
LOC_Os03g03034	387.731	5663.88	3025.81	54.6975	936.517	495.607	189.186	1446.87	818.027	164.83	4112.96	2138.9	933.027	6268.28	3600.65	552.645	9199.75	4876.2	380.353	4604.71	3.5977	8.81517e-14	0.000144372	NA
LOC_Os03g03260	766.651	102.794	434.722	296.929	184.011	240.47	130.013	12.3532	71.1832	406.834	39.8028	223.319	34.2306	4.73524	19.4829	35.47	142.732	89.1012	278.355	81.0713	-1.77966	0.0113931	0.0114334	NA
LOC_Os03g03370	91.0581	546.26	318.659	28.1301	124.934	76.5318	56.6724	143.606	100.139	76.2219	227.761	151.991	501.722	757.047	629.384	361.565	605.138	483.351	185.895	400.791	1.10836	0.0188811	0.00886835	NA
LOC_Os03g04530	904.706	41.9786	473.342	1901.91	1701.61	1801.76	940.096	47.8686	493.982	329.66	30.2207	179.94	280.691	61.5581	171.124	445.091	33.029	239.06	800.359	319.378	-1.32538	5.78869e-07	6.71432e-08	NA
LOC_Os03g04890	8.81208	278.243	143.527	1.56279	16.4641	9.01345	4.16709	6.1766	5.17184	11.4333	20.6385	16.0359	47.9228	150.344	99.1333	32.0374	76.6744	54.3559	17.6559	91.4234	2.37241	0.0450856	0.0476532	NA
LOC_Os03g07600	214.427	2883.07	1548.75	75.0137	394.17	234.592	97.5099	3633.38	1865.45	319.179	6201.14	3260.16	388.272	1013.34	700.807	213.964	2657.65	1435.81	218.061	2797.13	3.68114	1.22726e-10	0.0370067	NA
LOC_Os03g08490	588.94	180.293	384.617	123.46	30.9913	77.2257	200.02	47.8686	123.945	2.85832	0.73709	1.7977	707.105	23.0843	365.095	437.081	87.2909	262.186	343.244	61.7108	-2.47564	0.000990485	6.69808e-05	NA
LOC_Os03g08500	3560.08	2735.6	3147.84	979.867	629.51	804.688	2344.41	969.725	1657.07	5233.58	1563.37	3398.48	9419.27	1482.72	5451	4932.61	2823.98	3878.29	4411.64	1700.82	-1.37509	0.00624982	0.0291725	NA
LOC_Os03g08754	1890.19	1068.84	1479.51	1861.28	1218.34	1539.81	1616.83	299.565	958.198	253.438	197.54	225.489	2064.59	611.438	1338.01	2144.22	970.816	1557.52	1638.42	727.757	-1.17078	0.0170534	0.0368762	NA
LOC_Os03g08840	39.6543	466.07	252.862	37.5069	44.5499	41.0284	29.1696	83.384	56.2768	2.85832	34.6432	18.7508	304.163	377.635	340.899	176.206	475.381	325.793	98.2596	246.944	1.32951	0.0252666	0.00147174	NA
LOC_Os03g08880	1.46868	592.006	296.737	1.56279	4.84238	3.20258	1.66684	7.72074	4.69379	3.81109	39.8028	21.807	222.01	118.973	170.491	3.43258	77.854	40.6433	38.9919	140.2	1.84624	0.00418112	5.85902e-06	NA
LOC_Os03g09900	847.428	6382.36	3614.89	120.334	368.99	244.662	225.856	2334.75	1280.3	1837.9	1543.47	1690.68	1593.19	3428.31	2510.75	266.597	4339.77	2303.18	815.217	3066.28	1.91123	2.89909e-05	0.000491828	NA
LOC_Os03g10090	4726.21	205.587	2465.9	3792.88	1278.39	2535.63	1566.83	160.591	863.709	1068.06	166.582	617.321	1207.85	134.362	671.106	1170.51	212.329	691.419	2255.39	359.64	-2.64875	1.63549e-08	0.00237923	NA
LOC_Os03g10210	42.5917	935.907	489.249	51.5719	138.492	95.0321	39.1707	80.2957	59.7332	37.1582	84.0282	60.5932	325.679	979.603	652.641	211.676	593.342	402.509	117.975	468.611	1.98992	0.00639466	0.00346076	NA
LOC_Os03g10260	24.9675	372.964	198.966	75.0137	87.1629	81.0883	85.0087	84.9282	84.9684	76.2219	306.629	191.426	349.152	1034.65	691.901	569.808	823.365	696.586	196.695	451.617	1.19914	0.0438239	0.00339885	NA
LOC_Os03g10950	73.434	736.24	404.837	28.1301	79.4151	53.7726	35.0036	131.253	83.1281	161.971	141.521	151.746	636.688	838.138	737.413	68.6515	1265.72	667.184	167.313	532.047	1.669	0.00602625	0.000781985	NA
LOC_Os03g12510	1.46868	1164.1	582.784	0	250.835	125.418	0	191.474	95.7372	40.0165	1398.26	719.138	2.93405	104.767	53.8506	5.72096	648.783	327.252	8.35669	626.37	6.22794	0	0.00015558	NA
LOC_Os03g12700	149.805	1.61456	75.7099	28.1301	9.68477	18.9075	63.3398	0	31.6699	11.4333	0	5.71664	2.93405	0	1.46702	4.57677	0	2.28838	43.3699	1.88322	-4.52542	0.000139407	0.019206	NA
LOC_Os03g12990	618.314	94.7209	356.517	600.11	704.083	652.096	314.199	24.7064	169.453	541.175	130.465	335.82	253.306	95.8886	174.597	72.0841	62.5191	67.3016	399.865	185.397	-1.10889	0.0157896	0.0221849	NA
LOC_Os03g13200	4442.75	1309.95	2876.35	1454.95	1244.49	1349.72	1749.35	330.448	1039.9	1560.64	311.789	936.216	1194.16	85.8262	639.992	274.606	631.089	452.848	1779.41	652.265	-1.44787	0.00314073	0.0222083	NA
LOC_Os03g13310	0	34.9822	17.4911	0	1.93695	0.968477	0	9.26489	4.63245	24.7721	145.944	85.3579	8.80214	41.4334	25.1178	2.28838	93.1889	47.7386	5.97711	54.4583	3.18763	0.000714596	0.0101178	NA
LOC_Os03g13740	1.46868	264.25	132.859	0	8.71629	4.35815	0	1.54415	0.772074	11.4333	8.10799	9.77063	51.8348	118.381	85.1079	14.8745	159.247	87.0607	13.2685	93.3743	2.81502	0.0102236	0.00117683	NA
LOC_Os03g14010	1111.79	504.819	808.305	1048.63	531.694	790.161	635.898	118.899	377.399	493.537	53.0705	273.303	216.141	66.2934	141.217	195.657	74.3152	134.986	616.942	224.849	-1.45618	0.0024379	0.00711267	NA
LOC_Os03g14050	635.938	6645.53	3640.74	2192.59	2713.67	2453.13	1388.47	2218.94	1803.71	2292.37	6273.37	4282.87	9768.42	14702.9	12235.7	6839.98	9891	8365.49	3852.96	7074.24	0.876607	0.0134143	0.000381647	NA
LOC_Os03g14130	339.265	5.92006	172.592	107.832	26.1489	66.9905	431.711	1.54415	216.627	3.81109	2.21127	3.01118	42.0547	0	21.0273	118.996	4.71842	61.8572	173.945	6.75713	-4.68608	9.36738e-06	0.0411895	NA
LOC_Os03g14140	71.9653	40.364	56.1647	411.013	367.053	389.033	42.5043	1.54415	22.0242	80.9857	35.3803	58.183	141.812	4.73524	73.2738	118.996	33.029	76.0125	144.546	80.3509	-0.847143	0.0183368	0.00462459	NA
LOC_Os03g15050	2395.42	567.249	1481.33	834.527	662.438	748.483	1114.28	1582.75	1348.52	2334.29	577.878	1456.09	674.831	169.877	422.354	662.487	158.067	410.277	1335.97	619.71	-1.10822	0.00931229	0.0417828	NA
LOC_Os03g16170	58.7472	158.765	108.756	129.711	44.5499	87.1306	37.5038	0	18.7519	191.507	3.68545	97.5964	463.579	120.157	291.868	647.613	125.038	386.326	254.777	75.3659	-1.75725	0.00390079	0.00776581	NA
LOC_Os03g16350	577.191	2232.4	1404.8	243.795	447.436	345.615	239.191	1104.07	671.629	739.352	1222.09	980.723	1728.15	2485.41	2106.78	830.684	2832.23	1831.46	726.394	1720.61	1.24409	0.00649654	0.0226146	NA
LOC_Os03g17240	785.743	3596.17	2190.95	339.124	550.095	444.61	365.871	826.12	595.995	2549.62	2189.89	2369.76	2731.6	3471.52	3101.56	1393.63	6049.02	3721.32	1360.93	2780.47	1.03074	0.0261483	0.000540503	NA
LOC_Os03g17700	271.706	2662.41	1467.06	64.0742	215.97	140.022	143.348	835.385	489.366	1364.37	1119.64	1242.01	1626.44	2361.7	1994.07	519.463	3215.61	1867.53	664.9	1735.12	1.38382	0.000795642	9.34461e-05	NA
LOC_Os03g17870	38.1857	1015.02	526.603	162.53	616.92	389.725	18.3352	112.723	65.529	43.8276	100.244	72.0359	39.1206	68.661	53.8908	62.9306	1437.94	750.435	60.8216	558.585	3.19912	0.000174725	0.014824	NA
LOC_Os03g18850	619.783	1993.98	1306.88	121.897	113.312	117.605	150.849	299.565	225.207	261.06	371.493	316.277	100.736	290.034	195.385	82.3818	798.593	440.488	222.784	644.497	1.53252	0.029822	0.0102043	NA
LOC_Os03g19070	64.6219	652.283	358.452	23.4418	22.275	22.8584	129.18	81.8399	105.51	616.444	1160.18	888.312	504.656	1385.06	944.857	188.792	1419.07	803.929	254.523	786.783	1.62817	0.028572	1.70217e-05	NA
LOC_Os03g19250	738.746	5192.43	2965.59	287.553	345.746	316.649	373.371	2070.7	1222.04	856.543	5449.3	3152.92	1087.55	3393.98	2240.77	1313.53	7035.17	4174.35	776.216	3914.56	2.33432	1.3942e-05	0.00631872	NA
LOC_Os03g19270	211.49	8738.54	4475.02	104.707	935.549	520.128	115.845	2699.17	1407.51	365.865	16255	8310.45	615.172	5381.01	2998.09	647.613	14565.8	7606.69	343.449	8095.85	4.55902	0	0.000195414	NA
LOC_Os03g19600	63.1532	457.997	260.575	7.81393	393.202	200.508	30.0031	3434.19	1732.1	39.0637	3030.91	1534.99	184.845	3444.3	1814.57	24.028	1855.52	939.774	58.1512	2102.69	5.17628	0	0.00175733	NA
LOC_Os03g20090	30.8423	1007.49	519.164	7.81393	19.3695	13.5917	11.6679	30.883	21.2754	166.735	425.301	296.018	276.778	1893.5	1085.14	177.35	2513.74	1345.55	111.865	981.714	3.13355	2.3373e-05	7.54595e-09	NA
LOC_Os03g20949	95.4641	954.744	525.104	35.9441	122.028	78.9861	15.0015	381.405	198.203	245.815	852.076	548.946	300.251	1029.91	665.083	171.629	1128.88	650.256	144.017	744.842	2.37069	1.6581e-05	0.0135348	NA
LOC_Os03g21380	398.012	2105.93	1251.97	368.817	451.31	410.064	245.025	302.653	273.839	726.966	850.602	788.784	5359.53	5497.02	5428.27	1234.58	9025.17	5129.87	1388.82	3038.78	1.12963	0.0411722	2.3545e-09	NA
LOC_Os03g21640	208.552	2078.48	1143.52	59.3859	156.893	108.14	141.681	319.639	230.66	571.664	597.78	584.722	825.445	2230.89	1528.17	291.769	2115.03	1203.4	349.75	1249.79	1.83729	0.00177422	0.000882754	NA
LOC_Os03g21960	252.613	4.3055	128.459	59.3859	30.9913	45.1886	89.1758	4.63245	46.9041	124.813	3.68545	64.2494	4.89008	0	2.44504	2.28838	1.17961	1.734	88.861	7.46571	-3.5732	0.000952643	0.0100205	NA
LOC_Os03g22200	760.776	144.772	452.774	178.158	165.61	171.884	162.517	21.6181	92.0673	262.965	10.3193	136.642	33.2525	17.7572	25.5048	74.3725	57.8007	66.0866	245.34	69.6462	-1.81667	0.0220882	0.0411519	NA
LOC_Os03g22510	164.492	1266.35	715.423	40.6324	124.934	82.783	147.515	197.651	172.583	249.627	678.86	464.243	586.809	1285.62	936.214	141.88	1975.84	1058.86	221.826	921.543	2.05462	0.00120131	0.00585306	NA
LOC_Os03g25300	1.46868	39.8258	20.6473	0	0	0	0	373.684	186.842	9.52773	241.765	125.647	9.78016	588.354	299.067	0	265.411	132.706	3.46276	251.507	6.18253	2.15896e-09	0.000242895	NA
LOC_Os03g25330	380.388	2364.26	1372.32	56.2603	443.562	249.911	126.68	1363.48	745.082	345.857	1829.46	1087.66	66.5051	741.657	404.081	19.4513	2019.49	1019.47	165.857	1460.32	3.13827	1.4183e-09	0.01953	NA
LOC_Os03g25760	41.123	788.982	415.053	59.3859	57.1401	58.263	80.0082	165.224	122.616	66.6941	487.953	277.324	365.778	1270.82	818.299	81.2376	1131.24	606.24	115.704	650.227	2.4905	0.000454965	0.0270175	NA
LOC_Os03g26870	650.625	1117.28	883.951	95.3299	225.655	160.493	42.5043	310.374	176.439	282.974	736.353	509.663	198.537	804.991	501.764	305.499	1239.77	772.633	262.578	739.069	1.49296	0.00255107	0.0252716	NA
LOC_Os03g27190	424.448	22.0657	223.257	659.496	213.065	436.28	413.375	4.63245	209.004	551.656	1.47418	276.565	497.81	7.69477	252.752	312.364	3.53882	157.952	476.525	42.0785	-3.5014	3.33101e-11	0.00120491	NA
LOC_Os03g28300	1514.21	103.332	808.77	267.236	645.006	456.121	115.012	41.692	78.3519	1182.39	59.7043	621.048	50.8568	15.9814	33.4191	97.2563	121.499	109.378	537.827	164.536	-1.70874	0.0222969	0.000169548	NA
LOC_Os03g32230	5.87472	664.661	335.268	6.25114	11.6217	8.93643	6.66735	55.5894	31.1284	105.758	119.409	112.583	119.318	537.45	328.384	58.3538	424.658	241.506	50.3705	302.231	2.585	0.00218263	0.00331157	NA
LOC_Os03g36279	0	23.142	11.571	0	0	0	0	0	0	0	2.21127	1.10563	0	16.5733	8.28667	9.15354	5.89803	7.52578	1.52559	7.97078	2.38535	0.0426735	0.0250614	NA
LOC_Os03g36540	8906.07	1471.94	5189.01	4922.77	3117.53	4020.15	9408.46	6326.38	7867.42	6870.45	2881.28	4875.87	1955.05	1342.44	1648.75	2918.83	1636.11	2277.47	5830.27	2795.95	-1.06023	0.0161487	0.0435637	NA
LOC_Os03g38540	599.221	3413.18	2006.2	210.976	477.459	344.218	484.216	3912.87	2198.54	1161.43	1869.26	1515.35	2476.34	6525.75	4501.05	707.111	6261.35	3484.23	939.882	3743.31	1.99376	3.28969e-05	0.00131804	NA
LOC_Os03g39610	69691.8	32856.3	51274	6768.42	24405.6	15587	14072.3	45859.7	29966	38793.1	62074.7	50433.9	5685.21	9320.73	7502.97	7128.32	37020.8	22074.5	23689.8	35256.3	0.573612	0.0263574	0.00147194	NA
LOC_Os03g44880	89.5894	1.07637	45.3329	145.339	11.6217	78.4804	11.6679	1.54415	6.606	415.409	0	207.705	9.78016	0.591905	5.18603	5.72096	0	2.86048	112.918	2.47236	-5.51324	1.04312e-05	0.00936547	NA
LOC_Os03g45519	27.9049	1.07637	14.4906	0	0	0	0.833418	0	0.416709	3.81109	0	1.90555	0	0	0	0	0	0	5.4249	0.179396	-4.91838	0.0381025	0.0204878	NA
LOC_Os03g45970	76.3713	93.6445	85.0079	1858.15	2179.07	2018.61	14.1681	50.9569	32.5625	45.7331	195.329	120.531	1306.63	3709.47	2508.05	81.2376	126.218	103.728	563.715	1059.12	0.909821	0.0386565	2.22045e-16	NA
LOC_Os03g46454	67.5592	430.011	248.785	0	0.968477	0.484238	25.0025	359.787	192.395	78.1274	956.005	517.066	7.82413	1.18381	4.50397	21.7397	521.386	271.563	33.3755	378.224	3.50238	0.000867401	9.5922e-07	NA
LOC_Os03g46470	33.7796	116.787	75.2831	0	4.84238	2.42119	5.00051	52.5011	28.7508	87.6551	142.258	114.957	1.95603	0.591905	1.27397	3.43258	138.014	70.7232	21.9706	75.8324	1.78724	0.0400078	0.00189172	NA
LOC_Os03g47280	10.2808	225.5	117.891	0	9.68477	4.84238	0.833418	57.1335	28.9835	141.963	107.615	124.789	53.7909	185.266	119.529	21.7397	171.043	96.3913	38.1013	126.04	1.72597	0.00194615	0.00718725	NA
LOC_Os03g47530	60.2158	1253.44	656.827	64.0742	54.2347	59.1545	105.844	123.532	114.688	400.165	1062.88	731.524	725.688	1574.47	1150.08	207.099	1671.5	939.3	260.514	956.676	1.87667	0.00734722	0.00048933	NA
LOC_Os03g47610	7910.31	997.26	4453.78	3428.75	2594.55	3011.65	3656.21	926.489	2291.35	9532.5	830.7	5181.6	1128.63	406.047	767.339	1599.58	763.205	1181.39	4542.66	1086.38	-2.06402	6.56217e-05	0.021104	NA
LOC_Os03g48030	728.465	12.9165	370.691	651.682	138.492	395.087	642.566	9.26489	325.915	718.391	15.4789	366.935	82.1533	12.43	47.2917	148.745	8.25724	78.5011	495.334	32.8066	-3.91634	6.71381e-09	0.0154619	NA
LOC_Os03g49380	1241.03	9526.45	5383.74	772.016	1602.83	1187.42	960.098	5994.39	3477.24	1784.54	7759.34	4771.94	5285.2	12506.4	8895.78	1319.25	8100.36	4709.8	1893.69	7581.62	2.00131	2.89682e-06	0.00825862	NA
LOC_Os03g51390	26.4362	513.969	270.202	4.68836	28.0858	16.3871	18.3352	30.883	24.6091	218.185	140.784	179.485	285.581	629.787	457.684	124.717	694.788	409.752	112.99	339.716	1.58813	0.0196283	0.000263506	NA
LOC_Os03g51530	171.835	1209.84	690.84	78.1393	589.802	333.971	68.3403	701.044	384.692	112.427	2350.58	1231.5	24.4504	185.858	105.154	35.47	726.637	381.054	81.7771	960.628	3.55421	8.9092e-09	0.0362455	NA
LOC_Os03g52070	4391.35	952.591	2671.97	2666.11	2652.66	2659.39	1376.81	321.183	848.995	3479.53	544.709	2012.12	936.939	453.991	695.465	559.51	808.03	683.77	2235.04	955.527	-1.22593	0.0114226	0.0209299	NA
LOC_Os03g53300	596.284	73.1934	334.739	511.031	130.744	320.888	456.713	6.1766	231.445	752.691	11.0563	381.874	201.471	1.18381	101.328	302.067	25.9513	164.009	470.043	41.3843	-3.50564	7.17995e-09	0.0395829	NA
LOC_Os03g53690	104.276	17.7602	61.0182	2945.85	1037.24	1991.54	124.179	38.6037	81.3915	221.043	19.9014	120.472	386.316	65.1096	225.713	40.0467	22.4125	31.2296	636.952	200.171	-1.66995	0.000522061	8.49731e-12	NA
LOC_Os03g55680	0	582.857	291.428	1.56279	145.272	73.4172	0.833418	126.62	63.7268	3.81109	2137.56	1070.69	4.89008	467.013	235.952	1.14419	740.793	370.968	2.04026	700.019	8.4225	0	0.0413	NA
LOC_Os03g55690	1.46868	0	0.73434	0	0	0	3.33367	0	1.66684	21.9138	0.73709	11.3254	0	0	0	0	0	0	4.45269	0.122848	-5.17973	0.0336049	0.0482555	NA
LOC_Os03g55800	437.666	3622	2029.83	170.344	240.182	205.263	230.857	492.583	361.72	646.933	723.085	685.009	2501.76	3093.89	2797.83	353.555	4435.32	2394.44	723.52	2101.18	1.53809	0.00679232	3.48356e-05	NA
LOC_Os03g56280	11355.8	1841.14	6598.48	2253.54	1941.8	2097.67	4695.48	1332.6	3014.04	13330.3	2148.62	7739.43	2014.71	752.311	1383.51	2734.62	1423.78	2079.2	6064.07	1573.37	-1.94642	0.000386295	0.0410682	NA
LOC_Os03g57220	11777.3	2302.9	7040.12	2247.29	1693.87	1970.58	3881.23	738.103	2309.67	12562.3	1655.5	7108.91	1583.41	304.831	944.119	2139.64	1330.6	1735.12	5698.54	1337.63	-2.09091	5.33691e-05	0.00199919	NA
LOC_Os03g57310	242.332	656.588	449.46	40.6324	103.627	72.1297	61.673	254.785	158.229	460.189	692.864	576.527	355.02	467.013	411.016	73.2283	593.342	333.285	205.512	461.37	1.1667	0.0192006	0.0432237	NA
LOC_Os03g57680	262.894	298.156	280.525	20.3162	37.7706	29.0434	10.8344	47.8686	29.3515	42.8748	250.611	146.743	13.6922	113.054	63.3731	5.72096	268.95	137.336	59.3887	169.402	1.51219	0.00771876	0.0229963	NA
LOC_Os03g58790	726.996	2671.56	1699.28	221.916	304.102	263.009	302.531	1783.49	1043.01	1238.61	2014.47	1626.54	1674.36	1974	1824.18	605.278	2170.48	1387.88	794.948	1819.68	1.19475	0.0101054	0.030633	NA
LOC_Os03g59440	0	35.5203	17.7602	0	0.968477	0.484238	0	302.653	151.327	0	224.812	112.406	8.80214	55.6391	32.2206	6.86515	50.7231	28.7941	2.61122	111.719	5.41901	8.9277e-06	0.0335433	NA
LOC_Os03g60210	1.46868	126.474	63.9713	1.56279	10.6532	6.10802	6.66735	58.6777	32.6725	14.2916	196.803	105.547	44.9887	468.197	256.593	18.3071	271.309	144.808	14.5477	188.686	3.69712	2.41563e-05	0.0189162	NA
LOC_Os03g60509	12442.7	2166.74	7304.7	2266.04	1475.96	1871	2059.38	554.349	1306.86	9437.22	632.423	5034.82	856.742	73.3962	465.069	699.101	859.933	779.517	4626.85	960.467	-2.26822	4.08138e-05	8.30395e-06	NA
LOC_Os03g60560	11.7494	839.034	425.391	1.56279	10.6532	6.10802	12.5013	37.0596	24.7804	183.885	395.817	289.851	222.988	645.177	434.082	298.634	1579.49	939.063	121.887	584.539	2.26176	0.000480034	4.67242e-08	NA
LOC_Os03g60570	8.81208	384.804	196.808	0	1.93695	0.968477	14.1681	26.2505	20.2093	293.454	468.789	381.122	191.691	559.35	375.521	122.429	799.773	461.101	105.092	373.484	1.82939	0.00469506	9.58306e-08	NA
LOC_Os03g61150	23.4989	1448.26	735.88	6.25114	636.289	321.27	8.33418	1789.67	899.001	31.4415	4245.64	2138.54	77.2632	687.202	382.233	48.0561	3162.52	1605.29	32.4742	1994.93	5.9409	0	0.04389	NA
LOC_Os03g61410	1.46868	0	0.73434	0	0	0	0.833418	0	0.416709	31.4415	0	15.7208	0	0	0	0	0	0	5.62394	0	#NUM!	0.0125961	0.0449827	NA
LOC_Os03g61740	1794.73	96.3355	945.531	1095.51	509.419	802.466	1368.47	239.343	803.908	1369.14	186.484	777.809	112.472	47.9443	80.2081	157.899	139.194	148.546	983.036	203.12	-2.27491	0.000622004	0.00985861	NA
LOC_Os03g63540	2294.08	644.748	1469.41	1701.87	1131.18	1416.53	1240.96	149.782	695.371	1145.23	138.573	641.903	335.459	100.624	218.042	197.945	276.028	236.987	1152.59	406.823	-1.50241	0.00293093	0.00402957	NA
LOC_Os04g03810	590.409	371.887	481.148	589.17	101.69	345.43	3859.56	80.2957	1969.93	1191.92	200.488	696.204	5551.22	286.482	2918.85	568.664	80.2132	324.438	2058.49	186.843	-3.46169	4.62851e-08	0.0169399	NA
LOC_Os04g03920	4.40604	283.625	144.015	0	11.6217	5.81086	0.833418	0	0.416709	14.2916	66.3381	40.3148	138.878	383.555	261.216	6.86515	181.659	94.2622	27.5457	154.466	2.48739	0.00165648	1.36657e-05	NA
LOC_Os04g05650	116.026	50.5896	83.3076	0	0	0	67.5069	1255.39	661.45	111.474	852.813	482.144	0	1.18381	0.591905	0	0	0	49.1678	359.997	2.8722	0.0357566	0	NA
LOC_Os04g06500	74.9026	2.69093	38.7968	0	0	0	5.00051	0	2.50025	0.952773	0	0.476387	0	0	0	0	0	0	13.476	0.448489	-4.90917	0.0294313	0.000883072	NA
LOC_Os04g06910	88.1208	39.2877	63.7042	0	0	0	8.33418	157.503	82.9187	0	288.939	144.47	0	0.591905	0.295953	0	0	0	16.0758	81.0537	2.33398	0.0297314	4.9393e-08	NA
LOC_Os04g07890	709.372	128.089	418.73	2456.7	920.053	1688.38	445.879	169.856	307.868	82.8913	3.68545	43.2884	386.316	166.325	276.321	1383.33	369.217	876.273	910.748	292.871	-1.63679	0.000294549	1.83039e-06	NA
LOC_Os04g08280	453.822	47.3605	250.591	235.981	153.019	194.5	165.85	12.3532	89.1017	585.003	37.5916	311.297	42.0547	4.14334	23.099	33.1816	56.6211	44.9013	252.649	51.8482	-2.28477	0.00347038	0.0478716	NA
LOC_Os04g09390	1.46868	129.703	65.5859	0	0	0	0	1.54415	0.772074	0	1.47418	0.73709	0	0	0	0	0	0	0.24478	22.1202	6.49774	0.0158536	0.000246465	NA
LOC_Os04g09580	691.748	474.681	583.214	0	12.5902	6.2951	170.851	747.368	459.109	448.756	783.526	616.141	65.5271	192.369	128.948	116.708	281.926	199.317	248.932	415.41	0.738787	0.0343258	3.71082e-06	NA
LOC_Os04g10924	96.9328	4.3055	50.6192	15.6279	11.6217	13.6248	0.833418	0	0.416709	75.2691	1.47418	38.3716	0	0	0	5.72096	0	2.86048	32.3974	2.90023	-3.48164	0.013741	0.00318678	NA
LOC_Os04g16732	30.8423	13.9929	22.4176	4.68836	6.77934	5.73385	210.021	3.0883	106.555	1889.35	151.84	1020.59	3.91206	7.10286	5.50746	24.028	9.43685	16.7324	360.474	32.0401	-3.49194	0.0410686	3.99494e-09	NA
LOC_Os04g20164	3847.94	681.883	2264.91	695.44	530.725	613.082	755.077	430.818	592.947	2735.41	376.653	1556.03	290.471	42.6172	166.544	316.941	239.46	278.201	1440.21	383.693	-1.90826	0.00248086	0.000756031	NA
LOC_Os04g22210	0	0	0	0	0	0	0	38.6037	19.3019	0	0	0	0	0.591905	0.295953	0	0	0	0	6.5326	#DIV/0!	0.0265291	0.00685166	NA
LOC_Os04g25060	49.9351	939.674	494.805	7.81393	88.1314	47.9727	18.3352	1937.91	978.121	3.81109	10.3193	7.06517	34.2306	1817.15	925.69	14.8745	294.902	154.888	21.5001	848.014	5.30167	2.67055e-10	4.49071e-05	NA
LOC_Os04g25560	4754.11	829.884	2792	1825.33	902.62	1363.98	1693.51	435.45	1064.48	3212.75	591.883	1902.32	828.379	269.317	548.848	631.594	254.795	443.195	2157.61	547.325	-1.97897	0.00021761	0.0345223	NA
LOC_Os04g25650	35.2483	795.44	415.344	21.879	68.7619	45.3204	65.84	4827.01	2446.42	52.4025	706.132	379.267	32.2745	1987.03	1009.65	11.4419	335.008	173.225	36.5144	1453.23	5.31465	4.865e-13	0.00117733	NA
LOC_Os04g25880	0	36.5967	18.2984	0	0	0	0	32.4271	16.2136	1.90555	206.385	104.145	0.978016	38.4738	19.7259	0	90.8297	45.4148	0.480594	67.4521	7.1329	1.01551e-06	0.0386998	NA
LOC_Os04g26320	408.293	141.543	274.918	3.12557	3.87391	3.49974	223.356	6.1766	114.766	526.884	55.2817	291.083	101.714	12.43	57.0718	3.43258	7.07764	5.25511	211.134	37.7305	-2.48436	0.0213887	0.000171049	NA
LOC_Os04g26870	4119.65	699.643	2409.64	2325.42	1080.82	1703.12	1721.01	254.785	987.897	5325.05	485.742	2905.4	483.14	182.307	332.723	704.822	462.406	583.614	2446.52	527.617	-2.21317	8.3661e-05	0.0118441	NA
LOC_Os04g27060	0	23.6802	11.8401	21.879	20.338	21.1085	0.833418	35.5154	18.1744	3.81109	31.6949	17.753	78.2413	193.553	135.897	263.164	132.116	197.64	61.3215	72.8162	0.247867	0.0483066	0.00210445	NA
LOC_Os04g27790	49.9351	2.15275	26.0439	0	0	0	0	0	0	0	0	0	0	0	0	11.4419	0	5.72096	10.2295	0.358791	-4.83345	0.0390278	0.00139082	NA
LOC_Os04g29770	67.5592	0	33.7796	0	0	0	0	0	0	73.3635	1.47418	37.4189	0.978016	0	0.489008	0	0	0	23.6501	0.245697	-6.58883	0.00302519	0.00115642	NA
LOC_Os04g29800	32.3109	0	16.1555	0	0	0	0	0	0	0	0	0	0	0	0	0	0	0	5.38516	0	#NUM!	0.0342643	0.00951109	NA
LOC_Os04g31410	1674.29	128.089	901.191	118.772	71.6673	95.2195	826.751	44.7803	435.766	749.833	33.9061	391.869	110.516	4.14334	57.3296	9.15354	18.8737	14.0136	581.553	50.2432	-3.53291	6.51474e-05	0.000631138	NA
LOC_Os04g31790	17.6242	853.026	435.325	4.68836	81.3521	43.0202	11.6679	239.343	125.505	49.5442	1387.94	718.742	69.4391	1036.43	552.933	46.9119	2133.91	1090.41	33.3126	955.332	4.84186	4.00235e-13	0.00104819	NA
LOC_Os04g31804	418.574	1268.51	843.54	54.6975	101.69	78.1938	75.8411	225.446	150.643	122.908	402.451	262.679	533.997	1081.41	807.704	140.736	1033.33	587.035	224.459	685.473	1.61065	0.00528917	0.00344115	NA
LOC_Os04g32740	4.40604	57.586	30.996	3.12557	10.6532	6.88941	7.50076	111.179	59.3397	14.2916	76.6573	45.4745	434.239	113.054	273.646	4.57677	22.4125	13.4946	78.0233	65.257	-0.257773	0.0279897	0.000610717	NA
LOC_Os04g32820	455.291	14.531	234.911	28.1301	25.1804	26.6553	16.6684	4.63245	10.6504	13.3388	0	6.66941	7.82413	0.591905	4.20802	2.28838	1.17961	1.734	87.2567	7.6859	-3.50498	0.01204	0.000589135	NA
LOC_Os04g32860	481.727	72.1171	276.922	164.092	88.1314	126.112	72.5074	0	36.2537	192.46	19.9014	106.181	35.2086	1.77572	18.4921	21.7397	76.6744	49.207	161.289	43.1	-1.90389	0.00668672	0.0328965	NA
LOC_Os04g33190	4360.51	4496.01	4428.26	537.598	1500.17	1018.88	565.058	2728.51	1646.78	1605.42	9748.75	5677.09	455.755	4708.01	2581.88	331.816	7880.95	4106.38	1309.36	5177.07	1.98327	1.07623e-06	0.00249653	NA
LOC_Os04g33640	39.6543	623.221	331.437	17.1906	43.5815	30.386	35.837	225.446	130.641	70.5052	277.146	173.825	391.206	1616.49	1003.85	180.782	2240.07	1210.43	122.529	837.66	2.77324	1.50692e-05	8.40512e-06	NA
LOC_Os04g34170	1866.69	13603.2	7734.95	2133.2	4562.49	3347.85	5399.72	28430.9	16915.3	2479.12	24723.5	13601.3	30485.7	49041.7	39763.7	7979.6	14082.1	11030.9	8390.68	22407.3	1.41711	5.89126e-05	1.20141e-05	NA
LOC_Os04g34250	126.306	2.69093	64.4987	146.902	92.0053	119.454	45.0046	0	22.5023	38.1109	1.47418	19.7926	32.2745	2.36762	17.3211	11.4419	1.17961	6.31076	66.6734	16.6196	-2.00422	0.000437278	0.00527107	NA
LOC_Os04g34460	2649.5	588.777	1619.14	2400.44	1573.77	1987.11	2118.55	764.354	1441.45	2472.45	582.301	1527.37	554.535	221.373	387.954	704.822	402.246	553.534	1816.71	688.804	-1.39917	0.00394623	0.0430135	NA
LOC_Os04g35580	324.578	31.753	178.166	434.454	239.214	336.834	237.524	16.9856	127.255	109.569	16.9531	63.261	70.4171	4.73524	37.5762	52.6328	30.6698	41.6513	204.863	56.7184	-1.85277	0.00182328	0.0185049	NA
LOC_Os04g38220	3743.66	477.372	2110.52	415.701	360.273	387.987	427.544	54.0452	240.794	1386.29	116.46	751.373	111.494	7.69477	59.5943	86.9586	172.222	129.591	1028.61	198.011	-2.37704	0.000420732	3.991e-06	NA
LOC_Os04g38790	82.246	1687.75	885	28.1301	60.0456	44.0879	55.839	67.9426	61.8908	159.113	249.136	204.125	1145.26	2023.72	1584.49	252.866	3939.88	2096.38	287.242	1338.08	2.21983	0.00216145	2.85716e-09	NA
LOC_Os04g39370	2.93736	56.5096	29.7235	0	3.87391	1.93695	1.66684	55.5894	28.6281	0.952773	36.1174	18.5351	79.2193	91.7453	85.4823	0	61.3395	30.6698	14.1294	50.8625	1.84791	0.000551005	0.00632799	NA
LOC_Os04g39520	23.4989	13.9929	18.7459	0	0	0	46.6714	9.26489	27.9682	27.6304	6.63381	17.1321	185.823	19.5329	102.678	188.792	44.825	116.808	78.7359	15.7082	-2.3255	0.044468	0.003318	NA
LOC_Os04g39880	2543.75	3823.28	3183.52	709.505	4035.64	2372.57	749.243	18106.7	9427.97	2365.74	23317.8	12841.8	581.919	4680.19	2631.06	551.501	3276.95	1914.22	1250.28	9540.1	2.93176	4.3744e-09	0.00215373	NA
LOC_Os04g41229	1227.82	3693.04	2460.43	39.0696	1831.39	935.23	235.024	2787.19	1511.11	203.893	4589.12	2396.51	60.637	1500.48	780.558	61.7864	5380.18	2720.98	304.704	3296.9	3.43563	2.88658e-15	0.000237251	NA
LOC_Os04g41340	9196.87	1358.92	5277.9	1915.98	2223.62	2069.8	2139.38	945.019	1542.2	5801.44	1129.96	3465.7	1035.72	282.339	659.029	1731.16	830.443	1280.8	3636.76	1128.38	-1.68839	0.00136273	0.0101278	NA
LOC_Os04g41680	610.971	46.8223	328.896	306.306	13.5587	159.932	98.3434	0	49.1717	773.652	9.58217	391.617	191.691	1.77572	96.7334	82.3818	15.3349	48.8584	343.891	14.5123	-4.5666	5.60163e-09	0.0311972	NA
LOC_Os04g42610	3546.86	179.216	1863.04	1454.95	729.263	1092.11	588.393	71.0308	329.712	1847.43	107.615	977.521	214.185	32.5548	123.37	300.923	87.2909	194.107	1325.46	201.162	-2.72006	6.95999e-07	6.61232e-05	NA
LOC_Os04g43290	854.771	94.7209	474.746	312.557	396.107	354.332	236.691	29.3388	133.015	228.666	40.5399	134.603	62.593	13.6138	38.1034	50.3445	54.2619	52.3032	290.937	104.764	-1.47357	0.017368	0.00840966	NA
LOC_Os04g43440	38.1857	814.277	426.231	35.9441	73.6042	54.7742	37.5038	188.386	112.945	334.423	389.92	362.172	356.976	918.637	637.806	83.526	1330.6	707.061	147.76	619.237	2.06724	0.000833198	0.00674257	NA
LOC_Os04g44870	1647.86	7718.14	4683	1792.52	2053.17	1922.84	2134.38	4047.21	3090.8	2875.47	6443.64	4659.55	12852.1	16259.6	14555.9	3621.37	13549	8585.16	4153.95	8345.13	1.00645	0.010031	0.000615435	NA
LOC_Os04g44900	126.306	1538.68	832.492	40.6324	101.69	71.1612	48.3383	375.228	211.783	228.666	939.052	583.859	508.568	1492.78	1000.68	157.899	1461.53	809.715	185.068	984.827	2.41181	1.90085e-05	0.00247105	NA
LOC_Os04g44910	187.991	1555.9	871.945	59.3859	153.988	106.687	59.1727	449.347	254.26	237.241	769.522	503.381	548.667	1634.25	1091.46	121.284	1000.31	560.795	202.29	927.219	2.19648	6.0847e-05	0.0100808	NA
LOC_Os04g45330	70.4966	713.636	392.066	321.934	504.576	413.255	520.053	755.089	637.571	20.0082	813.01	416.509	619.084	2036.15	1327.62	922.219	1561.8	1242.01	412.299	1064.04	1.36779	0.00103535	0.0269273	NA
LOC_Os04g45510	0	104.946	52.4732	0	0	0	0	21.6181	10.809	0	0.73709	0.368545	1.95603	106.543	54.2495	0	5.89803	2.94902	0.326005	39.9571	6.93741	7.26199e-05	0.00732557	NA
LOC_Os04g46110	2858.05	207.202	1532.63	2173.83	535.568	1354.7	883.423	88.0165	485.72	1460.6	63.3897	761.996	219.076	10.6543	114.865	96.1121	129.757	112.934	1281.85	172.431	-2.89413	5.51711e-07	9.31388e-05	NA
LOC_Os04g46240	0	2.69093	1.34547	0	0	0	0	0	0	0	0	0	0	27.8195	13.9098	0	0	0	0	5.08508	#DIV/0!	0.0249098	0.0299232	NA
LOC_Os04g46630	351.014	48.975	199.995	834.527	551.063	692.795	252.526	18.5298	135.528	777.463	12.5305	394.997	110.516	5.32715	57.9215	105.266	29.4902	67.3779	405.219	110.986	-1.86832	1.89457e-05	7.09814e-05	NA
LOC_Os04g46740	1699.26	1210.92	1455.09	9078.22	4342.65	6710.44	4387.11	569.791	2478.45	2705.88	1480.81	2093.34	4053.88	554.615	2304.25	5207.22	1518.15	3362.69	4521.93	1612.82	-1.48735	0.000356576	0.0277275	NA
LOC_Os04g46780	1144.1	429.473	786.787	545.412	404.823	475.118	358.37	46.3245	202.347	869.882	55.2817	462.582	51.8348	19.5329	35.6839	45.7677	246.538	146.153	502.561	200.329	-1.32693	0.0416786	0.00258607	NA
LOC_Os04g46980	54.3411	994.031	524.186	9.37671	43.5815	26.4791	25.0025	307.286	166.144	132.435	618.418	375.427	333.503	542.777	438.14	185.359	570.929	378.144	123.336	512.837	2.0559	0.000289472	0.00378649	NA
LOC_Os04g47620	0	158.227	79.1135	3.12557	13.5587	8.34212	5.83393	32.4271	19.1305	23.8193	71.4977	47.6585	86.0654	285.89	185.978	22.8838	542.619	282.751	23.6213	184.037	2.96183	0.000810861	0.00801095	NA
LOC_Os04g48390	2310.23	278.781	1294.51	2547.34	1133.12	1840.23	1329.3	121.988	725.645	2494.36	240.291	1367.33	795.127	463.462	629.294	326.095	191.096	258.595	1633.74	404.789	-2.01294	0.000100722	0.0386298	NA
LOC_Os04g49370	118.963	2298.06	1208.51	107.832	110.406	109.119	76.6745	220.813	148.744	645.027	829.963	737.495	3559	2660.61	3109.81	2521.8	5249.25	3885.52	1171.55	1894.85	0.693666	0.0469429	3.63112e-11	NA
LOC_Os04g49450	2201.55	4526.69	3364.12	576.668	926.832	751.75	655.067	1289.36	972.216	347.762	991.386	669.574	2354.08	4064.61	3209.35	2257.49	3928.09	3092.79	1398.77	2621.16	0.906048	0.0338043	0.00141633	NA
LOC_Os04g49690	44.0604	294.388	169.224	32.8185	27.1174	29.9679	19.1686	71.0308	45.0997	319.179	393.606	356.392	154.526	451.624	303.075	67.5073	674.735	371.121	106.21	318.75	1.58551	0.0261291	0.013571	NA
LOC_Os04g50120	264.362	3916.92	2090.64	212.539	324.44	268.489	204.187	534.276	369.232	504.017	1084.26	794.138	4552.66	2760.05	3656.36	2121.33	3994.15	3057.74	1309.85	2102.35	0.682601	0.0230842	4.70994e-07	NA
LOC_Os04g52260	1442.24	8692.8	5067.52	253.171	1495.33	874.25	505.052	2844.32	1674.69	865.118	1172.71	1018.91	1599.06	8839.51	5219.28	535.482	9454.54	4995.01	866.687	5416.54	2.64379	2.60976e-07	0.00455735	NA
LOC_Os04g52780	42.5917	511.816	277.204	12.5023	30.0228	21.2625	20.8355	112.723	66.7792	88.6079	78.1315	83.3697	305.141	1288.58	796.859	43.4793	218.227	130.853	85.5263	373.25	2.1257	0.00599697	0.000375959	NA
LOC_Os04g52840	653.562	2909.44	1781.5	256.297	458.09	357.193	492.55	1578.12	1035.34	2396.22	2242.23	2319.23	1153.08	2345.72	1749.4	655.622	3642.62	2149.12	934.556	2196.04	1.23255	0.0054939	0.0229614	NA
LOC_Os04g53230	10881.4	1905.18	6393.31	2169.15	2164.55	2166.85	3444.52	1122.6	2283.56	9053.25	2144.93	5599.09	1472.89	523.836	998.364	1754.05	1199.66	1476.85	4795.88	1510.13	-1.66713	0.00251219	0.011767	NA
LOC_Os04g53800	618.314	22.6039	320.459	378.194	46.4869	212.34	67.5069	6.1766	36.8417	514.498	0.73709	257.617	51.8348	1.77572	26.8053	19.4513	5.89803	12.6746	274.966	13.9464	-4.30129	2.06184e-06	0.00980592	NA
LOC_Os04g54220	16.1555	995.108	505.632	1.56279	27.1174	14.3401	2.50025	461.701	232.1	10.4805	1867.79	939.133	3.91206	393.025	198.469	3.43258	896.501	449.967	6.34061	773.539	6.93071	0	0.00467783	NA
LOC_Os04g54280	2.93736	113.557	58.2474	28.1301	84.2575	56.1938	23.3357	379.861	201.598	79.0802	67.8123	73.4462	2.93405	24.86	13.897	0	35.3882	17.6941	22.7362	117.623	2.3711	0.00174272	0.0384352	NA
LOC_Os04g54550	22.0302	2.69093	12.3606	1.56279	0	0.781393	1.66684	0	0.833418	1.90555	0	0.952773	0	0	0	0	0	0	4.52756	0.448489	-3.33559	0.0491446	0.027307	NA
LOC_Os04g54610	4.40604	13.9929	9.19945	4.68836	0	2.34418	1.66684	0	0.833418	18.1027	0	9.05135	149.636	2.36762	76.002	9.15354	3.53882	6.34618	31.2756	3.31655	-3.23728	0.0216242	0.0442	NA
LOC_Os04g55170	161.555	2.69093	82.1228	1112.7	349.62	731.162	53.3388	0	26.6694	334.423	5.89672	170.16	133.01	9.47048	71.2403	36.6142	9.43685	23.0255	305.274	62.8525	-2.28006	1.17364e-06	1.22571e-07	NA
LOC_Os04g56030	1.46868	66.7352	34.1019	1.56279	6.77934	4.17106	0	21.6181	10.809	6.66941	10.3193	8.49433	91.9335	53.2715	72.6025	1.14419	24.7717	12.958	17.1298	30.5825	0.836202	0.030245	0.0433131	NA
LOC_Os04g57440	1956.28	6493.23	4224.75	1583.1	2042.52	1812.81	1375.14	4714.29	3044.71	1923.65	5354.22	3638.93	6663.22	11231.4	8947.31	4736.96	4570.97	4653.96	3039.72	5734.44	0.915711	0.0213473	0.0414338	NA
LOC_Os04g57760	471.446	2742.06	1606.75	114.083	388.359	251.221	152.516	756.633	454.574	657.414	2234.86	1446.13	1075.82	1394.53	1235.17	443.947	2886.5	1665.22	485.87	1733.82	1.83531	0.000165645	0.00927871	NA
LOC_Os04g58280	1310.06	15256.5	8283.29	1086.14	1511.79	1298.96	1199.29	6490.06	3844.67	5887.19	19821.8	12854.5	11538.6	11245.6	11392.1	7089.42	14922	11005.7	4685.12	11541.3	1.30065	0.000847497	0.000144762	NA
LOC_Os04g58810	196.803	2821.71	1509.26	12.5023	40.676	26.5892	90.0092	155.959	122.984	2282.84	2711.02	2496.93	2503.72	1547.83	2025.78	567.519	2647.04	1607.28	942.233	1654.04	0.811837	0.0144021	4.26692e-12	NA
LOC_Os04g58850	2562.85	13910	8236.41	1364.31	1022.71	1193.51	2722.78	2669.83	2696.31	8806.48	11063.7	9935.1	6797.21	11847	9322.1	2968.03	20107.6	11537.8	4203.61	10103.5	1.26515	0.0356826	0.00110723	NA
LOC_Os04g59150	859.177	14015.5	7437.32	356.315	1760.69	1058.5	910.093	15674.7	8292.37	475.434	9334.5	4904.97	12870.7	18093.4	15482	1487.45	15053	8270.2	2826.53	12321.9	2.12413	7.31448e-11	3.87583e-08	NA
LOC_Os04g59160	10.2808	345.516	177.898	3.12557	9.68477	6.40517	2.50025	27.7947	15.1475	1.90555	10.3193	6.1124	355.02	194.145	274.582	8.00935	159.247	83.6281	63.4735	124.451	0.971352	0.00486212	6.35429e-06	NA
LOC_Os05g01140	631.532	134.009	382.77	0	0	0	591.727	37.0596	314.393	790.802	151.84	471.321	299.273	52.0877	175.68	163.619	342.086	252.853	412.826	119.514	-1.78836	0.0065826	5.29766e-07	NA
LOC_Os05g01380	7.3434	195.362	101.353	1.56279	30.9913	16.277	3.33367	240.887	122.11	9.52773	100.244	54.886	54.7689	559.35	307.06	8.00935	34.2086	21.109	14.091	193.507	3.77954	1.57084e-05	0.0254814	NA
LOC_Os05g02760	2.93736	313.763	158.35	0	8.71629	4.35815	2.50025	16.9856	9.74295	31.4415	151.103	91.2725	131.054	542.185	336.62	29.749	634.628	332.189	32.947	277.897	3.07633	2.88617e-05	1.32852e-05	NA
LOC_Os05g04500	8237.82	2368.02	5302.92	1786.26	1534.07	1660.17	1025.1	313.462	669.283	6146.34	865.343	3505.84	728.622	134.954	431.788	488.57	1030.98	759.773	3068.79	1041.14	-1.55951	0.00580928	1.98736e-05	NA
LOC_Os05g04680	30.8423	371.887	201.365	4.68836	24.2119	14.4501	12.5013	38.6037	25.5525	20.961	60.4414	40.7012	266.998	152.712	209.855	25.1722	214.688	119.93	60.1939	143.757	1.25595	0.0260404	0.0102931	NA
LOC_Os05g05170	46.9977	0.538187	23.768	26.5674	12.5902	19.5788	14.1681	1.54415	7.85613	2.85832	0	1.42916	0	0	0	1.14419	0	0.572096	15.2893	2.44542	-2.64437	0.0240015	0.010381	NA
LOC_Os05g06140	561.035	10.7637	285.9	79.7021	3.87391	41.788	102.51	0	51.2552	1026.14	5.15963	515.648	70.4171	0.591905	35.5045	11.4419	1.17961	6.31076	308.541	3.5948	-6.42341	3.60763e-10	0.00204348	NA
LOC_Os05g06920	2862.46	153.921	1508.19	70.3254	1.93695	36.1312	2143.55	154.415	1148.98	11165.5	167.319	5666.43	166.263	2.95953	84.6111	139.591	4.71842	72.1549	2757.96	80.8784	-5.0917	0	0	NA
LOC_Os05g07010	1.46868	275.552	138.51	0	0	0	0	0	0	26.6777	59.7043	43.191	135.944	90.5615	113.253	35.47	1147.76	591.613	33.2601	262.262	2.97915	0.0132089	2.27046e-10	NA
LOC_Os05g07120	0	379.96	189.98	0	0	0	0	6.1766	3.0883	2.85832	25.0611	13.9597	133.01	414.334	273.672	35.47	189.917	112.693	28.5564	169.241	2.5672	0.00066361	3.55754e-08	NA
LOC_Os05g07810	2.93736	277.166	140.052	4.68836	11.6217	8.15504	3.33367	44.7803	24.057	17.1499	236.606	126.878	112.472	160.998	136.735	52.6328	666.477	359.555	32.2023	232.942	2.85473	0.000299496	0.0035018	NA
LOC_Os05g08420	1182.29	2187.73	1685.01	1122.08	390.296	756.188	1515.99	770.53	1143.26	5076.38	1757.96	3417.17	6866.65	2128.49	4497.57	5138.57	2383.98	3761.28	3483.66	1603.17	-1.11968	0.0265666	0.00896939	NA
LOC_Os05g08830	0	141.005	70.5025	0	0	0	0	0	0	9.52773	4.42254	6.97514	10.7582	110.094	60.4263	3.43258	109.703	56.568	3.95308	60.8709	3.9447	0.0175888	0.00120063	NA
LOC_Os05g08900	61.6845	445.619	253.652	3.12557	9.68477	6.40517	7.50076	54.0452	30.773	194.366	297.047	245.706	345.24	265.174	305.207	54.9212	480.1	267.51	111.14	258.612	1.21841	0.0191112	0.000192901	NA
LOC_Os05g10330	986.952	422.477	704.715	3056.81	1407.2	2232	31.6699	1.54415	16.607	20.961	2.94836	11.9547	749.16	202.432	475.796	490.858	494.255	492.557	889.402	421.809	-1.07625	0.00379123	6.77236e-15	NA
LOC_Os05g10650	20.5615	932.14	476.351	9.37671	30.0228	19.6997	6.66735	335.08	170.874	53.3553	989.912	521.633	85.0874	1325.87	705.477	17.1629	500.153	258.658	32.0352	685.529	4.41949	5.13919e-10	0.0054572	NA
LOC_Os05g10670	556.629	343.363	449.996	795.458	420.319	607.888	662.568	140.518	401.543	637.405	167.319	402.362	4435.3	736.922	2586.11	4575.62	364.498	2470.06	1943.83	362.157	-2.42422	0.000113725	0.00365464	NA
LOC_Os05g11130	421.511	350.36	385.935	12.5023	127.839	70.1706	33.3367	798.325	415.831	63.8358	296.31	180.073	1.95603	98.8482	50.4021	8.00935	238.28	123.145	90.1919	318.327	1.81944	2.65331e-05	0.000607518	NA
LOC_Os05g12094	0	0.538187	0.269093	0	0.968477	0.484238	0	40.1479	20.0739	0	0	0	7.82413	33.7386	20.7814	0	1.17961	0.589803	1.30402	12.7621	3.29083	0.0288846	0.00369759	NA
LOC_Os05g12481	446.478	693.723	570.101	31.2557	58.1086	44.6822	218.356	955.828	587.092	141.01	322.845	231.928	161.373	318.445	239.909	112.131	1035.69	573.913	185.101	564.107	1.60766	0.014394	0.0213031	NA
LOC_Os05g12630	3188.5	32.2912	1610.4	42.1952	4.84238	23.5188	5267.2	197.651	2732.43	311.557	2.21127	156.884	44.0107	2.36762	23.1892	133.87	16.5145	75.1925	1497.89	42.6463	-5.13437	9.29257e-14	1.22125e-15	NA
LOC_Os05g13970	4.40604	314.839	159.623	0	16.4641	8.23205	0.833418	495.672	248.253	10.4805	524.808	267.644	4.89008	469.973	237.431	2.28838	179.3	90.7943	3.8164	333.509	6.44937	1.9641e-12	0.0406854	NA
LOC_Os05g18294	671.186	70.5025	370.844	153.153	211.128	182.14	59.1727	3.0883	31.1305	551.656	13.2676	282.462	26.4064	2.36762	14.387	33.1816	49.5435	41.3625	249.126	58.3162	-2.09491	0.00412012	0.00107178	NA
LOC_Os05g18800	8.81208	0	4.40604	23.4418	27.1174	25.2796	18.3352	1.54415	9.93968	0	0.73709	0.368545	153.548	1.18381	77.3661	24.028	0	12.014	38.0276	5.09707	-2.89931	0.0130286	0.0239027	NA
LOC_Os05g22840	48.4664	10.7637	29.6151	53.1347	3.87391	28.5043	178.352	4.63245	91.492	1932.22	217.441	1074.83	9.78016	7.69477	8.73746	11.4419	16.5145	13.9782	372.233	43.4868	-3.09756	0.00312297	4.32783e-09	NA
LOC_Os05g24640	0	0	0	6.25114	5.81086	6.031	15.8349	0	7.91747	35.2526	0	17.6263	0	0	0	1.14419	0	0.572096	9.74715	0.968477	-3.33119	0.0381385	0.0174681	NA
LOC_Os05g25920	24.9675	1096.29	560.627	4.68836	18.4011	11.5447	4.16709	54.0452	29.1062	55.2608	127.517	91.3887	159.417	1355.46	757.44	62.9306	627.55	345.241	51.9052	546.544	3.39639	1.03209e-05	7.75647e-06	NA
LOC_Os05g27304	979.609	76.9607	528.285	168.781	105.564	137.172	95.8431	40.1479	67.9955	669.8	72.2348	371.017	39.1206	5.91905	22.5198	37.7583	54.2619	46.0101	331.819	59.1814	-2.48718	0.0142559	0.0116222	NA
LOC_Os05g28740	497.882	2101.62	1299.75	81.2648	276.016	178.64	176.685	296.477	236.581	1257.66	2484.73	1871.2	786.325	388.882	587.603	881.028	3140.11	2010.57	613.474	1447.97	1.23896	0.0331734	0.000122405	NA
LOC_Os05g29810	165.961	4055.24	2110.6	217.227	521.041	369.134	123.346	1417.53	770.437	67.6469	1786.71	927.176	623.974	3192.74	1908.36	863.865	4803.36	2833.61	343.67	2629.43	2.93566	3.01199e-09	0.00450939	NA
LOC_Os05g30010	8221.67	938.06	4579.86	10109.7	5012.84	7561.25	6003.95	1897.76	3950.85	12472.8	1417.42	6945.09	2284.64	1173.16	1728.9	1835.28	1240.95	1538.11	6821.33	1946.7	-1.80902	0.000162766	0.02303	NA
LOC_Os05g30300	4.40604	1.07637	2.74121	9.37671	0.968477	5.1726	0.833418	0	0.416709	68.5997	3.68545	36.1426	0	0	0	3.43258	0	1.71629	14.4414	0.95505	-3.91849	0.0293111	0.022473	NA
LOC_Os05g31140	803.368	2366.41	1584.89	159.404	925.864	542.634	150.849	1970.33	1060.59	307.746	424.564	366.155	145.724	59.7824	102.753	120.14	1143.04	631.589	281.205	1148.33	2.02984	0.0026514	0.0172125	NA
LOC_Os05g32820	2276.45	334.214	1305.33	2403.56	759.286	1581.43	1425.98	540.452	983.215	2572.49	330.216	1451.35	261.13	81.6829	171.407	225.406	268.95	247.178	1527.5	385.8	-1.98525	0.0010997	0.00583764	NA
LOC_Os05g33090	1.46868	0.538187	1.00343	301.618	179.168	240.393	1.66684	0	0.833418	700.288	88.4508	394.37	248.416	32.5548	140.485	2.28838	0	1.14419	209.291	50.1187	-2.06209	0.0118879	1.95217e-11	NA
LOC_Os05g33400	44.0604	1008.56	526.311	17.1906	69.7303	43.4605	105.844	270.226	188.035	451.615	528.493	490.054	615.172	1516.46	1065.82	163.619	771.462	467.541	232.917	694.156	1.57544	0.00200774	0.000469194	NA
LOC_Os05g33410	0	102.794	51.3969	0	0.968477	0.484238	3.33367	118.899	61.1166	2.85832	23.5869	13.2226	31.2965	250.376	140.836	6.86515	83.752	45.3086	7.39228	96.7294	3.70986	0.000156299	0.00694714	NA
LOC_Os05g33430	5.87472	142.62	74.2471	0	5.81086	2.90543	7.50076	319.639	163.57	18.1027	70.7606	44.4317	51.8348	770.069	410.952	16.0187	209.97	112.994	16.5553	253.145	3.9346	6.71867e-06	0.00158116	NA
LOC_Os05g34270	334.859	1301.34	818.098	134.4	389.328	261.864	107.511	554.349	330.93	834.629	1174.92	1004.78	981.928	2169.33	1575.63	169.34	1337.67	753.507	427.111	1154.49	1.43457	0.00105839	0.0123257	NA
LOC_Os05g34380	0	0	0	0	0	0	0	0	0	24.7721	0	12.3861	0.978016	0	0.489008	0	0	0	4.29169	0	#NUM!	0.0260006	0.0390754	NA
LOC_Os05g35444	820.992	1906.8	1363.89	0	2.90543	1.45272	1230.13	2013.57	1621.85	373.487	1004.65	689.07	3.91206	10.0624	6.98723	2.28838	7.07764	4.68301	405.134	824.178	1.02456	0.026127	0	NA
LOC_Os05g35570	941.423	341.211	641.317	1961.3	1465.31	1713.3	1846.02	211.548	1028.78	804.141	204.174	504.157	916.401	63.9258	490.163	779.195	153.349	466.272	1208.08	406.585	-1.57108	6.59206e-05	0.0108776	NA
LOC_Os05g37050	0	83.419	41.7095	0	4.84238	2.42119	0	37.0596	18.5298	0	16.9531	8.47653	58.6809	138.506	98.5934	38.9025	66.0579	52.4802	16.2639	57.8063	1.82955	0.00108691	0.00332633	NA
LOC_Os05g37250	155.68	1093.6	624.638	43.758	232.434	138.096	68.3403	236.255	152.298	79.0802	238.08	158.58	1057.24	1245.37	1151.3	419.919	3337.11	1878.51	304.002	1063.81	1.80708	0.000344159	2.24734e-06	NA
LOC_Os05g37970	252.613	1217.92	735.265	190.66	230.497	210.579	185.019	497.216	341.117	361.101	681.808	521.455	814.687	2447.53	1631.11	561.798	1454.45	1008.13	394.313	1088.24	1.46458	0.0125016	0.0312122	NA
LOC_Os05g38010	20.5615	2.15275	11.3571	0	0	0	12.5013	0	6.25064	3.81109	0	1.90555	0.978016	0	0.489008	0	0	0	6.30865	0.358791	-4.13611	0.0155661	0.047998	NA
LOC_Os05g39310	133.65	4059.54	2096.6	56.2603	359.305	207.783	255.859	3344.63	1800.24	301.076	23693.7	11997.4	480.206	9204.72	4842.46	259.732	8316.22	4287.98	247.797	8163.03	5.04187	0	2.22667e-05	NA
LOC_Os05g39320	51.4038	275.014	163.209	0	18.4011	9.20053	2.50025	231.622	117.061	8.57496	498.273	253.424	10.7582	798.48	404.619	0	150.99	75.4948	12.2062	328.797	4.75151	4.49727e-10	0.000868378	NA
LOC_Os05g39350	1393.78	1262.59	1328.18	134.4	444.531	289.465	411.709	2337.84	1374.78	793.66	1394.57	1094.12	200.493	661.75	431.122	53.777	1213.81	633.796	497.969	1219.18	1.29179	0.00114467	0.012765	NA
LOC_Os05g39990	1969.5	5391.56	3680.53	909.541	3515.57	2212.56	1703.51	18381.5	10042.5	777.463	2742.71	1760.09	4343.37	5791.79	5067.58	3922.29	4790.38	4356.34	2270.94	6768.93	1.57563	0.000710291	0.0188558	NA
LOC_Os05g40770	212.958	1612.95	912.952	156.279	370.927	263.603	55.839	506.481	281.16	485.914	952.32	719.117	671.897	1795.25	1233.57	227.694	2136.27	1181.98	301.764	1229.03	2.02603	8.28991e-05	0.03637	NA
LOC_Os05g41370	5.87472	185.136	95.5055	1.56279	35.8336	18.6982	4.16709	58.6777	31.4224	9.52773	81.817	45.6723	130.076	239.13	184.603	10.2977	233.562	121.93	26.9177	139.026	2.36873	0.00014993	0.015829	NA
LOC_Os05g41550	5641.2	2602.67	4121.93	804.835	1924.36	1364.6	959.264	4232.51	2595.89	5335.53	5797.95	5566.74	1239.15	5533.72	3386.43	588.115	3900.96	2244.54	2428.01	3998.7	0.719752	0.00831094	0.0252496	NA
LOC_Os05g43760	1442.24	249.181	845.712	2326.99	1732.61	2029.8	2019.37	152.871	1086.12	1132.85	276.409	704.628	1880.72	104.175	992.45	2431.41	115.601	1273.5	1872.26	438.474	-2.09422	1.24533e-07	0.0125915	NA
LOC_Os05g43930	176.242	27.9857	102.114	3.12557	0	1.56279	74.1742	21.6181	47.8962	51.4498	3.68545	27.5676	0.978016	0	0.489008	1.14419	0	0.572096	51.1855	8.88154	-2.52685	0.0100882	8.29808e-05	NA
LOC_Os05g44550	2.93736	0.538187	1.73777	0	0	0	7.50076	0	3.75038	49.5442	0.73709	25.1406	0.978016	0	0.489008	0	0	0	10.1601	0.212546	-5.57899	0.0175794	0.0436486	NA
LOC_Os05g44770	107.214	3150.01	1628.61	51.5719	115.249	83.4103	41.6709	883.253	462.462	339.187	672.963	506.075	1060.17	2406.09	1733.13	361.565	2619.91	1490.73	326.896	1641.25	2.32789	8.21924e-06	5.27538e-05	NA
LOC_Os05g45180	2041.46	50.5896	1046.03	162.53	75.5412	119.035	152.516	3.0883	77.8019	351.573	5.89672	178.735	13.6922	1.77572	7.73397	1.14419	1.17961	1.1619	453.82	23.0119	-4.30167	8.05665e-06	9.11638e-09	NA
LOC_Os05g46350	82.246	1385.29	733.77	167.218	237.277	202.247	157.516	169.856	163.686	67.6469	259.456	163.551	634.732	1457.86	1046.3	835.26	1643.19	1239.23	324.103	858.823	1.40591	0.0147184	0.00104661	NA
LOC_Os05g47650	32.3109	264.25	148.28	6.25114	87.1629	46.707	15.8349	285.668	150.751	14.2916	193.855	104.073	343.284	794.337	568.81	138.447	396.348	267.397	91.7366	336.937	1.87691	8.8363e-05	0.00178369	NA
LOC_Os05g48010	239.395	1490.24	864.817	57.8231	112.343	85.0832	100.844	393.758	247.301	113.38	560.188	336.784	371.646	955.927	663.786	28.6048	1008.56	518.584	151.949	753.503	2.31003	0.000155694	0.0483254	NA
LOC_Os05g48040	837.147	3967.51	2402.33	401.636	2399.89	1400.76	697.571	25435.2	13066.4	4613.33	17659.2	11136.3	449.887	13812.7	7131.29	418.774	8337.46	4378.12	1236.39	11935.3	3.27103	5.39679e-13	5.13108e-05	NA
LOC_Os05g48850	1105.92	122.707	614.311	225.041	239.214	232.127	270.028	38.6037	154.316	612.633	70.0235	341.328	105.626	8.28667	56.9562	50.3445	94.3685	72.3565	394.931	95.5338	-2.04752	0.00571996	0.0423797	NA
LOC_Os05g48890	199.74	215.275	207.508	81.2648	258.583	169.924	329.2	2557.11	1443.16	50.497	570.507	310.502	141.812	741.657	441.735	46.9119	323.212	185.062	141.571	777.724	2.45773	0.000187709	0.0138847	NA
LOC_Os05g49100	4.40604	110.328	57.3672	1.56279	4.84238	3.20258	0.833418	4.63245	2.73293	1.90555	2.94836	2.42695	27.3844	116.605	71.9949	6.86515	46.0046	26.4349	7.15956	47.5602	2.73181	0.0361746	0.031447	NA
LOC_Os05g49420	678.53	3315.77	1997.15	367.255	553.969	460.612	549.223	1738.71	1143.97	1213.83	1998.25	1606.04	2755.07	3191.55	2973.31	1792.95	2927.78	2360.37	1226.14	2287.67	0.899753	0.0305549	0.0233778	NA
LOC_Os05g50500	471.446	16.6838	244.065	284.427	92.9738	188.7	295.03	94.1931	194.612	202.941	22.8498	112.895	10.7582	4.73524	7.74671	10.2977	5.89803	8.09788	212.483	39.5556	-2.42539	0.00868981	0.00288567	NA
LOC_Os05g50610	0	417.095	208.547	1.56279	15.4956	8.52921	0.833418	27.7947	14.314	9.52773	35.3803	22.454	145.724	406.639	276.182	68.6515	297.261	182.956	37.7166	199.944	2.40632	0.00038521	9.18063e-05	NA
LOC_Os05g51130	124.838	952.591	538.714	168.781	202.412	185.596	138.347	197.651	167.999	201.035	280.094	240.565	721.776	4138.6	2430.19	418.774	4738.48	2578.63	295.592	1751.64	2.56703	0.00174214	1.52258e-05	NA
LOC_Os05g51390	13.2181	450.463	231.84	0	8.71629	4.35815	4.16709	21.6181	12.8926	10.4805	36.8545	23.6675	37.1646	460.502	248.833	14.8745	325.571	170.223	13.3175	217.287	4.02821	5.78717e-05	0.00206343	NA
LOC_Os05g51620	3527.77	629.141	2078.45	5752.61	3703.46	4728.03	2443.58	359.787	1401.68	3446.18	1093.1	2269.64	814.687	152.712	483.699	1136.18	510.769	823.476	2853.5	1074.83	-1.40863	0.000104569	6.8878e-05	NA
LOC_Os06g01790	619.783	22.0657	320.924	376.631	123.965	250.298	315.866	29.3388	172.602	596.436	87.7137	342.075	58.6809	2.95953	30.8202	83.526	15.3349	49.4305	341.82	46.8963	-2.86569	2.31051e-05	0.0134129	NA
LOC_Os06g01950	643.282	64.5824	353.932	182.846	106.532	144.689	260.027	35.5154	147.771	411.598	70.7606	241.179	17.6043	2.36762	9.98595	29.749	23.5921	26.6706	257.518	50.5584	-2.34865	0.00612774	0.00696068	NA
LOC_Os06g02780	3266.34	2698.47	2982.41	1644.05	610.14	1127.1	2882.79	310.374	1596.58	2579.16	316.949	1448.05	485.096	54.4553	269.776	192.224	330.29	261.257	1841.61	720.113	-1.35467	0.00109339	2.53068e-05	NA
LOC_Os06g02930	98.4015	44.6695	71.5355	0	0	0	107.511	7.72074	57.6159	146.727	16.216	81.4715	0.978016	0	0.489008	0	0	0	58.9363	11.4344	-2.36578	0.0373533	1.77911e-06	NA
LOC_Os06g02940	55.8098	11.3019	33.5559	1.56279	0	0.781393	71.674	0	35.837	118.144	2.21127	60.1776	0	0	0	0	0	0	41.1984	2.2522	-4.19318	0.00381819	0.000211405	NA
LOC_Os06g02960	227.645	11.8401	119.743	640.742	174.326	407.534	145.015	3.0883	74.0515	282.021	0.73709	141.379	96.8236	10.0624	53.443	106.41	80.2132	93.3115	249.776	46.7112	-2.4188	4.10284e-05	0.0144567	NA
LOC_Os06g03099	151.274	28.5239	89.8989	279.739	232.434	256.087	281.695	21.6181	151.657	0	0	0	725.688	54.4553	390.071	204.81	22.4125	113.611	273.868	59.9074	-2.19267	0.0015845	1.74713e-06	NA
LOC_Os06g04930	0	6.45824	3.22912	0	0.968477	0.484238	57.5059	948.107	502.807	0.952773	16.9531	8.95292	0	5.91905	2.95953	0	2.35921	1.17961	9.74311	163.461	4.06842	0.000145015	4.40126e-12	NA
LOC_Os06g04940	2.93736	1241.06	621.998	0	145.272	72.6358	0.833418	270.226	135.53	2.85832	1817.66	910.261	10.7582	2070.48	1040.62	9.15354	2149.24	1079.2	4.42347	1282.32	8.17937	0	0.000835736	NA
LOC_Os06g05690	14.6868	300.308	157.498	4.68836	248.899	126.793	5.00051	2002.76	1003.88	12.3861	2898.97	1455.68	50.8568	400.128	225.492	9.15354	519.027	264.09	16.1287	1061.68	6.04058	2.22045e-16	0.0401312	NA
LOC_Os06g05930	4878.95	1644.16	3261.56	2859.9	1371.36	2115.63	2451.08	738.103	1594.59	2673.48	360.437	1516.96	676.787	278.195	477.491	254.011	947.224	600.617	2299.04	889.914	-1.36929	0.0172667	0.0205672	NA
LOC_Os06g06360	1.46868	148.54	75.0041	0	2.90543	1.45272	0	4.63245	2.31622	8.57496	12.5305	10.5527	40.0986	102.991	71.5451	1.14419	37.7474	19.4458	8.54775	51.5578	2.59258	0.00627465	0.00630645	NA
LOC_Os06g08720	1853.47	848.183	1350.83	657.933	484.238	571.086	1111.78	591.409	851.595	1292.91	197.54	745.227	616.15	30.7791	323.465	485.138	130.936	308.037	1002.9	380.514	-1.39815	0.00108417	0.0338987	NA
LOC_Os06g10030	2.93736	5.38187	4.15961	0	0	0	0	15.4415	7.72074	0	16.216	8.10799	0	0	0	0	0	0	0.48956	6.17322	3.65647	0.0486341	0.0382908	NA
LOC_Os06g10100	4.40604	67.2734	35.8397	0	0	0	3.33367	63.3101	33.3219	4.76387	14.7418	9.75283	0	0.591905	0.295953	0	1.17961	0.589803	2.08393	24.5161	3.55635	0.0286628	0.00513605	NA
LOC_Os06g10780	8.81208	273.937	141.375	4.68836	6.77934	5.73385	12.5013	140.518	76.5094	9.52773	44.2254	26.8766	89.9775	258.071	174.024	10.2977	304.338	157.318	22.6341	171.311	2.92005	0.00132151	0.0474527	NA
LOC_Os06g10870	0	1.61456	0.80728	0	0	0	0	38.6037	19.3019	0	0	0	0	102.4	51.1998	0	2.35921	1.17961	0	24.1628	#DIV/0!	0.000323701	0.00985831	NA
LOC_Os06g10930	0	69.4261	34.7131	1.56279	1.93695	1.74987	0	3.0883	1.54415	0	0	0	0.978016	10.6543	5.81615	0	0	0	0.423467	14.1843	5.0659	0.0397866	0.0367289	NA
LOC_Os06g11150	27.9049	859.485	443.695	37.5069	44.5499	41.0284	25.0025	63.3101	44.1563	87.6551	50.8592	69.2572	266.998	1057.14	662.07	70.9399	629.91	350.425	86.0013	450.876	2.3903	0.0150243	0.00471626	NA
LOC_Os06g11200	0	254.024	127.012	0	0	0	0.833418	6.1766	3.50501	5.71664	1.47418	3.59541	0.978016	37.8819	19.43	3.43258	75.4948	39.4637	1.82678	62.5086	5.09668	0.00710617	0.0263607	NA
LOC_Os06g11240	80.7774	1414.89	747.835	40.6324	56.1717	48.402	24.1691	217.725	120.947	227.713	183.535	205.624	484.118	775.988	630.053	107.554	975.534	541.544	160.827	603.975	1.90898	0.00487676	0.00411675	NA
LOC_Os06g11400	445.01	22.0657	233.538	650.119	125.902	388.01	414.209	37.0596	225.634	50.497	11.0563	30.7767	177.999	3.55143	90.7752	327.239	11.7961	169.518	344.179	35.2385	-3.28793	1.45776e-06	0.026543	NA
LOC_Os06g11760	22.0302	207.202	114.616	1.56279	12.5902	7.07649	6.66735	100.37	53.5185	342.998	140.784	241.891	96.8236	50.3119	73.5677	33.1816	399.886	216.534	83.8773	151.857	0.856365	0.0349549	0.00498967	NA
LOC_Os06g12455	23.4989	0	11.7494	154.716	80.3836	117.55	13.3347	0	6.66735	23.8193	0	11.9097	100.736	6.51096	53.6233	26.3164	8.25724	17.2868	57.0701	15.8586	-1.84747	0.000933988	0.00403804	NA
LOC_Os06g13180	17.6242	453.153	235.389	0	16.4641	8.23205	8.33418	83.384	45.8591	60.0247	142.995	101.51	134.966	438.01	286.488	11.4419	329.11	170.276	38.7319	243.853	2.65442	8.77657e-05	0.00229452	NA
LOC_Os06g13190	359.826	7562.6	3961.21	4.68836	16.4641	10.5762	254.193	952.74	603.466	1393.91	1889.16	1641.53	99.7576	432.683	266.22	32.0374	345.625	188.831	357.402	1866.55	2.38475	2.01126e-05	5.10703e-15	NA
LOC_Os06g13240	55.8098	0	27.9049	0	0	0	214.189	0	107.094	359.196	0	179.598	0	0	0	0	0	0	104.866	0	#NUM!	1.33822e-07	2.63858e-05	NA
LOC_Os06g17970	3357.4	503.205	1930.3	1.56279	0	0.781393	1459.32	1349.59	1404.45	1681.64	490.902	1086.27	4.89008	3.55143	4.22075	5.72096	1.17961	3.45028	1085.09	391.404	-1.47108	0.016237	0	NA
LOC_Os06g18000	198.272	706.64	452.456	29.6929	201.443	115.568	43.3378	100.37	71.8537	475.434	402.451	438.942	580.941	368.165	474.553	38.9025	481.279	260.091	227.763	376.725	0.725975	0.0386559	0.0234051	NA
LOC_Os06g18010	5392.99	817.506	3105.25	168.781	129.776	149.278	1105.11	254.785	679.949	4047.38	300.733	2174.06	77.2632	15.9814	46.6223	97.2563	82.5724	89.9144	1814.8	266.892	-2.76548	0.000354766	7.15579e-11	NA
LOC_Os06g18020	22.0302	0.538187	11.2842	14.0651	0.968477	7.51677	13.3347	0	6.66735	484.009	398.028	441.019	5.86809	0	2.93405	2.28838	1.17961	1.734	90.2659	66.7858	-0.43464	0.0022573	1.55642e-11	NA
LOC_Os06g18790	10.2808	1.61456	5.94766	265.674	254.709	260.191	73.3408	16.9856	45.1632	1133.8	20.6385	577.219	122.252	24.86	73.556	52.6328	163.965	108.299	276.33	80.4622	-1.78001	0.0329685	0.000104811	NA
LOC_Os06g19070	293.736	1713.05	1003.39	32.8185	373.832	203.325	48.3383	594.497	321.418	279.163	655.273	467.218	721.776	2137.96	1429.87	216.252	1613.7	914.977	265.347	1181.39	2.15453	4.5224e-06	0.00271194	NA
LOC_Os06g19110	26.4362	10.2256	18.3309	0	0	0	34.1702	3.0883	18.6292	273.446	6.63381	140.04	0	0	0	0	0	0	55.6754	3.32461	-4.06578	0.0395083	7.02639e-06	NA
LOC_Os06g19550	715.247	189.98	452.613	643.868	323.471	483.669	371.705	91.1048	231.405	319.179	159.948	239.564	107.582	10.0624	58.8221	171.629	46.0046	108.817	388.201	136.762	-1.50514	0.0049014	0.0266723	NA
LOC_Os06g19740	224.708	4.84368	114.776	20.3162	33.8967	27.1065	193.353	1.54415	97.4486	155.302	4.42254	79.8623	16.6263	0	8.31313	2.28838	0	1.14419	102.099	7.45118	-3.77636	8.24346e-05	0.00455818	NA
LOC_Os06g21410	5.87472	38.7495	22.3121	15.6279	10.6532	13.1406	3.33367	646.998	325.166	5.71664	17.6902	11.7034	68.4611	346.265	207.363	10.2977	97.9073	54.1025	18.2186	193.044	3.40544	0.00472439	0.0159718	NA
LOC_Os06g21550	142.462	193.209	167.836	464.147	331.219	397.683	87.5089	15.4415	51.4752	246.768	34.6432	140.706	1554.07	275.828	914.947	1053.8	675.914	864.858	591.459	254.376	-1.21732	0.021983	0.000165418	NA
LOC_Os06g22010	177.71	44.1313	110.921	89.0788	53.2662	71.1725	435.044	69.4867	252.266	1863.62	260.193	1061.91	48.9008	42.6172	45.759	57.2096	64.8783	61.044	445.261	89.0954	-2.32123	0.0405047	0.000677393	NA
LOC_Os06g22060	3142.97	713.636	1928.3	739.198	947.17	843.184	815.083	486.407	650.745	2678.25	650.113	1664.18	454.777	99.4401	277.109	398.179	561.493	479.836	1371.41	576.376	-1.25058	0.0449196	0.0257852	NA
LOC_Os06g24990	1.46868	0	0.73434	39.0696	52.2977	45.6837	70.0071	3.0883	36.5477	278.21	18.4272	148.319	283.625	31.9629	157.794	139.591	63.6987	101.645	135.329	28.2458	-2.26036	0.00884911	0.00258364	NA
LOC_Os06g28820	596.284	3.22912	299.756	64.0742	9.68477	36.8795	60.8395	6.1766	33.5081	793.66	4.42254	399.041	1.95603	0.591905	1.27397	2.28838	1.17961	1.734	253.184	4.21409	-5.90882	5.3338e-05	0.000633276	NA
LOC_Os06g30950	9514.1	1421.35	5467.73	2562.97	2212.97	2387.97	3211.16	793.693	2002.43	6077.74	1037.09	3557.41	1052.34	228.475	640.41	463.398	614.575	538.986	3813.62	1051.36	-1.85891	0.00104517	0.000935329	NA
LOC_Os06g32600	0	0.538187	0.269093	7.81393	0	3.90696	0	0	0	3.81109	0	1.90555	273.844	0	136.922	2.28838	0	1.14419	47.9596	0.0896978	-9.06253	0.00263301	0.00403623	NA
LOC_Os06g33710	4110.83	1853.52	2982.17	1142.4	1103.1	1122.75	1901.03	738.103	1319.57	5082.09	1857.47	3469.78	428.371	102.991	265.681	679.65	821.006	750.328	2224.06	1079.36	-1.04302	0.0422448	0.000204676	NA
LOC_Os06g33970	1.46868	350.898	176.183	0	7.74781	3.87391	1.66684	23.1622	12.4145	20.961	24.324	22.6425	92.9115	391.841	242.376	18.3071	92.0093	55.1582	22.5525	148.33	2.71745	0.00201313	0.000848706	NA
LOC_Os06g35480	24.9675	513.43	269.199	4.68836	95.8792	50.2838	111.678	1230.69	671.182	13.3388	802.691	408.015	180.933	1316.4	748.665	43.4793	1245.66	644.572	63.1808	867.458	3.77924	5.36005e-11	0.000797006	NA
LOC_Os06g35650	1.46868	97.4118	49.4403	1.56279	5.81086	3.68682	0	15.4415	7.72074	7.62219	19.9014	13.7618	60.637	93.521	77.079	5.72096	66.0579	35.8895	12.8353	49.6908	1.95286	0.010944	0.0488001	NA
LOC_Os06g36390	42.5917	1393.9	718.248	70.3254	267.3	168.812	58.3393	680.97	369.654	165.783	1009.08	587.429	1264.57	1408.14	1336.36	784.916	2780.33	1782.62	397.755	1256.62	1.6596	1.38664e-05	6.92346e-05	NA
LOC_Os06g36560	2677.4	2063.41	2370.41	551.663	1317.13	934.396	514.219	7364.05	3939.13	956.584	1896.53	1426.56	351.108	483.587	417.347	321.518	745.511	533.515	895.416	2311.7	1.36833	0.0195851	0.000901673	NA
LOC_Os06g38660	27.9049	513.969	270.937	0	0	0	26.6694	100.37	63.5195	20.961	67.8123	44.3866	88.0214	384.146	236.084	1.14419	0	0.572096	27.4502	177.716	2.69469	0.0392537	4.03953e-07	NA
LOC_Os06g39240	19.0928	409.022	214.057	1.56279	2.90543	2.23411	9.1676	40.1479	24.6577	101.947	622.104	362.025	14.6702	797.888	406.279	13.7303	175.761	94.7458	26.6951	341.305	3.67641	3.35893e-05	0.000146513	NA
LOC_Os06g39708	73.434	18.8365	46.1353	70.3254	19.3695	44.8474	528.387	47.8686	288.128	1791.21	245.451	1018.33	11.7362	29.0034	20.3698	24.028	34.2086	29.1183	416.521	65.7896	-2.66246	0.0448882	5.82872e-06	NA
LOC_Os06g39716	23.4989	0.538187	12.0185	3.12557	1.93695	2.53126	50.0051	1.54415	25.7746	413.504	52.3334	232.918	2.93405	7.69477	5.31441	10.2977	4.71842	7.50808	83.8941	11.461	-2.87184	0.0450873	0.000964249	NA
LOC_Os06g40170	406.824	3885.17	2146	489.152	688.587	588.869	645.899	1020.68	833.291	1289.1	1250.84	1269.97	3225.5	4144.52	3685.01	1367.31	4956.7	3162.01	1237.3	2657.75	1.10301	0.0296448	0.00677341	NA
LOC_Os06g40940	20294.2	3637.07	11965.6	7987.4	5225.9	6606.65	7666.62	1419.07	4542.84	16676.4	4754.23	10715.3	3149.21	860.63	2004.92	4264.4	3130.67	3697.54	10006.4	3171.26	-1.65779	0.000258739	0.0097228	NA
LOC_Os06g43600	1790.32	10792.8	6291.56	4392.99	12162.1	8277.56	8686.72	31557.8	20122.2	2721.12	24247.3	13484.2	13988.6	43396.7	28692.6	11050.6	36734.1	23892.4	7105.05	26481.8	1.89808	4.76201e-06	0.00935377	NA
LOC_Os06g43620	6519.47	2153.29	4336.38	3478.76	2645.88	3062.32	2472.75	504.937	1488.84	3921.61	455.521	2188.57	1008.33	319.629	663.982	910.777	1237.41	1074.09	3051.95	1219.44	-1.32351	0.00294047	0.00686048	NA
LOC_Os06g43780	2.93736	232.497	117.717	0	0.968477	0.484238	1.66684	4.63245	3.14964	7.62219	11.0563	9.33927	56.7249	85.2343	70.9796	2.28838	127.397	64.8429	11.8733	76.9643	2.69647	0.0261452	0.00247614	NA
LOC_Os06g45380	4657.18	1244.83	2951	1590.92	1519.54	1555.23	1748.51	938.843	1343.68	3298.5	739.301	2018.9	867.5	247.416	557.458	321.518	647.604	484.561	2080.69	889.588	-1.22585	0.0446789	0.0316358	NA
LOC_Os06g46754	1599.39	280.934	940.163	2434.82	1751.01	2092.91	1915.2	160.591	1037.89	1986.53	332.427	1159.48	418.591	56.231	237.411	632.738	370.396	501.567	1497.88	491.931	-1.60639	6.23005e-05	0.00117049	NA
LOC_Os06g47620	489.07	1290.03	889.552	85.9532	214.033	149.993	263.36	503.393	383.376	141.963	604.414	373.188	820.555	1775.72	1298.14	440.514	1579.49	1010	373.569	994.514	1.41262	0.00601908	0.00988484	NA
LOC_Os06g48810	834.21	205.587	519.899	190.66	1391.7	791.181	333.367	2018.2	1175.78	40.0165	78.1315	59.074	160.395	414.334	287.364	88.1028	429.377	258.74	274.458	756.222	1.46222	0.0147269	0.00140125	NA
LOC_Os06g50080	1020.73	1694.21	1357.47	287.553	2544.19	1415.87	318.366	9379.16	4848.76	330.612	5710.97	3020.79	92.9115	1653.19	873.051	51.4887	2619.91	1335.7	350.277	3933.6	3.48928	1.01774e-12	0.00810065	NA
LOC_Os06g50930	69.0279	849.259	459.143	85.9532	276.984	181.469	287.529	1138.04	712.784	86.7024	1275.9	681.302	820.555	1598.14	1209.35	948.535	2157.5	1553.02	383.051	1215.97	1.6665	7.22206e-05	0.00202408	NA
LOC_Os06g50940	0	119.478	59.7388	0	2.90543	1.45272	0.833418	37.0596	18.9465	1.90555	29.4836	15.6946	41.0767	92.9291	67.0029	1.14419	50.7231	25.9336	7.4933	55.4297	2.88699	0.000320208	0.0163536	NA
LOC_Os06g50950	292.267	5992.17	3142.22	100.018	469.711	284.865	157.516	1899.3	1028.41	242.957	639.057	441.007	1545.26	3070.21	2307.74	1199.11	5768.27	3483.69	589.523	2973.12	2.33436	1.3075e-06	1.39494e-05	NA
LOC_Os07g01090	446.478	170.067	308.273	1014.25	424.193	719.22	132.514	23.1622	77.8379	464.001	198.277	331.139	215.163	61.5581	138.361	137.303	159.247	148.275	401.618	172.751	-1.21713	0.0368244	0.031739	NA
LOC_Os07g01480	2285.26	282.01	1283.64	160.967	121.06	141.013	116.679	98.8255	107.752	2056.08	299.258	1177.67	103.67	47.9443	75.807	196.801	149.81	173.306	819.911	166.485	-2.30008	0.026861	0.000135865	NA
LOC_Os07g01560	204.146	7144.97	3674.56	70.3254	229.529	149.927	39.1707	2709.98	1374.58	212.468	2318.15	1265.31	411.745	4852.44	2632.09	156.754	3700.42	1928.59	182.435	3492.58	4.25884	4.86278e-14	0.00422315	NA
LOC_Os07g01760	9991.42	1792.7	5892.06	1611.23	1853.66	1732.45	1905.19	1012.96	1459.08	9304.78	1948.13	5626.46	1243.06	592.497	917.778	1346.71	1108.83	1227.77	4233.73	1384.8	-1.61226	0.0150839	0.00456813	NA
LOC_Os07g03319	2.93736	219.58	111.259	0	0	0	0	0	0	0	2.21127	1.10563	2.93405	15.3895	9.16179	1.14419	146.271	73.7077	1.16927	63.9087	5.77234	0.00139357	0.000212832	NA
LOC_Os07g03600	0	10.2256	5.11278	10.9395	2.90543	6.92246	0	0	0	0	0	0	0	34.3305	17.1652	0	21.2329	10.6165	1.82325	11.4491	2.65065	0.0261385	0.0200934	NA
LOC_Os07g05700	41.123	159.303	100.213	310.994	377.706	344.35	8.33418	177.577	92.9557	6.66941	184.272	95.4709	168.219	380.003	274.111	637.315	436.454	536.885	195.442	285.886	0.548696	0.0126006	0.00793034	NA
LOC_Os07g05830	0	111.943	55.9714	0	0.968477	0.484238	0	10.809	5.40452	0.952773	5.15963	3.0562	33.2525	127.852	80.552	2.28838	254.795	128.542	6.08228	85.2544	3.80909	0.000207077	0.000274182	NA
LOC_Os07g06175	224.708	0.538187	112.623	0	0	0	0.833418	0	0.416709	3.81109	1.47418	2.64264	23.4724	0	11.7362	0	0	0	42.1375	0.335394	-6.9731	0.00448852	0.00136309	NA
LOC_Os07g06570	462.634	57.0478	259.841	851.718	446.468	649.093	501.718	155.959	328.838	450.662	100.244	275.453	90.9555	47.3524	69.1539	92.6796	83.752	88.2158	408.394	148.471	-1.45979	0.0231954	0.0402163	NA
LOC_Os07g07040	854.771	2708.7	1781.73	285.99	218.876	252.433	741.742	2033.64	1387.69	2679.2	2922.56	2800.88	1715.44	6901.02	4308.23	552.645	3195.55	1874.1	1138.3	2996.73	1.39651	0.00913822	0.000784442	NA
LOC_Os07g07540	4104.96	647.977	2376.47	1412.76	1276.45	1344.61	1726.01	1037.67	1381.84	2168.51	913.254	1540.88	430.327	233.803	332.065	726.562	353.882	540.222	1761.52	743.839	-1.24376	0.0249345	0.0270136	NA
LOC_Os07g09270	0	0	0	0	0	0	0	27.7947	13.8973	0	2.21127	1.10563	0.978016	18.941	9.95949	0	1.17961	0.589803	0.163003	8.35442	5.67957	0.00841956	0.0473298	NA
LOC_Os07g09420	69.0279	1883.12	976.072	29.6929	40.676	35.1845	21.6689	194.563	108.116	51.4498	78.1315	64.7906	389.25	902.655	645.953	64.0748	443.532	253.803	104.194	590.446	2.50253	0.00146958	0.000165977	NA
LOC_Os07g11110	6403.44	1342.24	3872.84	2080.07	1465.31	1772.69	2227.73	1480.84	1854.28	6859.01	2205.37	4532.19	1036.7	491.281	763.989	1272.34	1100.57	1186.46	3313.21	1347.6	-1.29784	0.0238203	0.0270787	NA
LOC_Os07g12270	0	31.2148	15.6074	0	7.74781	3.87391	105.844	132.797	119.32	7.62219	25.7981	16.7102	2.93405	17.7572	10.3456	1.14419	40.1066	20.6254	19.5908	42.5702	1.11967	0.00769527	0.00585572	NA
LOC_Os07g12340	151.274	1457.41	804.342	39.0696	75.5412	57.3054	95.0097	461.701	278.355	718.391	1272.22	995.304	1206.87	1249.51	1228.19	146.457	828.084	487.27	392.845	890.744	1.18105	0.0036027	8.06493e-05	NA
LOC_Os07g14150	1628.77	1581.19	1604.98	1192.41	579.149	885.777	987.601	489.495	738.548	3801.57	411.296	2106.43	8348.34	2143.88	5246.11	4723.23	1697.45	3210.34	3446.98	1150.41	-1.58318	0.00227441	0.00536618	NA
LOC_Os07g17210	5.87472	44.1313	25.003	1.56279	0.968477	1.26563	4.16709	111.179	57.6729	40.0165	89.9249	64.9707	11.7362	151.528	81.632	0	2.35921	1.17961	10.5595	66.6817	2.65874	0.0169502	0.00860022	NA
LOC_Os07g18158	1290.97	82.3426	686.656	1.56279	2.90543	2.23411	125.013	21.6181	73.3154	590.719	33.169	311.944	4.89008	2.36762	3.62885	0	2.35921	1.17961	335.526	24.127	-3.7977	0.0265522	1.78731e-09	NA
LOC_Os07g23150	681.467	53.8187	367.643	198.474	98.7846	148.629	65.0066	3.0883	34.0475	73.3635	1.47418	37.4189	35.2086	2.36762	18.7881	12.5861	4.71842	8.65227	177.684	27.3753	-2.69837	0.000367727	0.000260638	NA
LOC_Os07g23660	257.019	15.6074	136.313	1148.65	506.513	827.58	80.8416	4.63245	42.737	822.243	12.5305	417.387	724.71	65.7015	395.206	552.645	240.64	396.642	597.684	140.937	-2.08433	2.22947e-06	4.32806e-05	NA
LOC_Os07g24000	10.2808	46.2841	28.2824	192.223	126.87	159.547	30.8365	331.992	181.414	39.0637	23.5869	31.3253	134.966	1290.95	712.956	97.2563	1040.41	568.834	84.1043	476.682	2.50277	0.0088198	0.00109679	NA
LOC_Os07g26630	8.81208	96.8737	52.8429	14.0651	24.2119	19.1385	9.1676	71.0308	40.0992	6.66941	57.493	32.0812	100.736	904.431	502.583	208.243	73.1356	140.689	57.9488	204.529	1.81946	0.0134419	0.000691985	NA
LOC_Os07g28850	74.9026	410.637	242.77	4.68836	37.7706	21.2295	18.3352	171.401	94.8679	97.1829	131.202	114.192	1805.42	281.747	1043.58	18.3071	136.834	77.5707	336.472	194.932	-0.787518	0.0188484	1.25954e-06	NA
LOC_Os07g30620	801.899	148.54	475.219	146.902	122.997	134.949	176.685	9.26489	92.9748	399.212	48.6479	223.93	58.6809	8.28667	33.4838	20.5955	67.2375	43.9165	267.329	67.4955	-1.98575	0.0170772	0.032896	NA
LOC_Os07g31190	8.81208	65.6588	37.2354	0	2.90543	1.45272	67.5069	95.7372	81.6221	3.81109	8.84508	6.32808	0	13.0219	6.51096	0	8.25724	4.12862	13.355	32.4043	1.2788	0.0201734	0.00348074	NA
LOC_Os07g32020	4698.3	1491.32	3094.81	271.925	165.61	218.767	326.7	94.1931	210.447	1079.49	165.845	622.669	795.127	253.927	524.527	37.7583	88.4705	63.1144	1201.55	376.56	-1.67395	0.019016	2.94984e-08	NA
LOC_Os07g32620	3225.22	730.858	1978.04	781.393	617.888	699.64	557.557	213.093	385.325	2321.91	218.179	1270.04	185.823	22.4924	104.158	120.14	142.732	131.436	1198.67	324.207	-1.88645	0.002761	2.21952e-05	NA
LOC_Os07g32630	4062.37	582.857	2322.61	664.184	802.867	733.526	466.714	128.164	297.439	1769.3	237.343	1003.32	74.3292	7.69477	41.012	76.6609	122.679	99.67	1185.59	313.601	-1.91861	0.003657	3.35154e-08	NA
LOC_Os07g32680	26.4362	355.203	190.82	17.1906	178.2	97.6952	20.8355	5421.51	2721.17	17.1499	1278.11	647.632	175.065	4623.96	2399.51	29.749	1072.26	551.005	47.7377	2154.87	5.49633	0	2.36743e-05	NA
LOC_Os07g32710	108.682	1325.55	717.118	10.9395	257.615	134.277	86.6755	4524.36	2305.52	24.7721	1276.64	650.706	508.568	5314.12	2911.35	34.3258	2445.32	1239.82	128.994	2523.94	4.2903	0	4.98359e-07	NA
LOC_Os07g33480	528.725	51.1278	289.926	82.8276	61.014	71.9208	114.178	15.4415	64.8099	133.388	7.3709	70.3796	12.7142	1.77572	7.24496	1.14419	11.7961	6.47013	145.496	24.7543	-2.55523	0.0324437	0.0116295	NA
LOC_Os07g34690	0	311.072	155.536	0	0	0	0	3.0883	1.54415	1.90555	14.0047	7.95513	11.7362	361.062	186.399	1.14419	90.8297	45.9869	2.46432	130.009	5.72128	1.19493e-05	6.64363e-05	NA
LOC_Os07g35340	55.8098	575.322	315.566	62.5114	430.972	246.742	12.5013	1312.53	662.514	135.294	1858.94	997.117	467.492	1917.77	1192.63	350.123	1974.66	1162.39	180.622	1345.03	2.8966	5.55619e-09	0.00562083	NA
LOC_Os07g35350	0	28.5239	14.262	0	15.4956	7.74781	0	315.006	157.503	10.4805	81.0799	45.7802	5.86809	197.104	101.486	28.6048	82.5724	55.5886	7.49223	119.964	4.00106	2.02958e-05	0.0494323	NA
LOC_Os07g35480	541.943	2453.59	1497.77	59.3859	174.326	116.856	180.018	11718.5	5949.28	501.159	6927.91	3714.53	651.359	4889.14	2770.25	92.6796	928.35	510.515	337.757	4515.31	3.74077	2.19543e-10	2.39815e-06	NA
LOC_Os07g36170	666.78	7601.89	4134.34	304.743	300.228	302.485	426.71	756.633	591.672	2978.37	1623.07	2300.72	1705.66	6709.84	4207.75	480.561	2905.37	1692.97	1093.8	3316.17	1.60016	0.00789804	8.09457e-05	NA
LOC_Os07g37100	1468.68	5314.6	3391.64	523.533	706.988	615.261	526.72	1349.59	938.153	1372.95	1160.18	1266.56	1305.65	5890.64	3598.15	546.924	4806.89	2676.91	957.409	3204.81	1.74303	0.00267033	0.0398225	NA
LOC_Os07g37454	7.3434	648.515	327.929	12.5023	73.6042	43.0533	5.00051	895.606	450.303	16.1971	1366.56	691.381	93.8895	1015.71	554.799	42.3351	1483.94	763.14	29.5447	913.991	4.95121	1.16573e-13	0.0207834	NA
LOC_Os07g38130	580.128	3224.82	1902.47	1081.45	1418.82	1250.13	1042.61	7061.39	4052	440.181	2328.47	1384.32	5497.43	6274.79	5886.11	3913.14	5446.24	4679.69	2092.49	4292.42	1.03657	0.00205774	0.00149439	NA
LOC_Os07g39350	910.581	3310.93	2110.75	118.772	1494.36	806.566	175.851	2385.71	1280.78	1407.25	1443.22	1425.23	1796.61	4629.29	3212.95	1247.17	5450.96	3349.06	942.706	3119.08	1.72624	2.08469e-05	0.0136595	NA
LOC_Os07g39680	3326.56	9810.61	6568.58	1381.5	2346.62	1864.06	2687.77	7058.3	4873.04	4005.46	3794.54	3900	8675.98	12026.3	10351.2	3123.64	15431.6	9277.63	3866.82	8411.33	1.12119	0.0145002	0.0250629	NA
LOC_Os07g40290	8.81208	513.969	261.39	20.3162	70.6988	45.5075	64.1732	762.81	413.491	16.1971	364.859	190.528	510.524	1274.37	892.448	151.033	439.993	295.513	128.509	571.117	2.15191	1.20855e-05	0.000347122	NA
LOC_Os07g41050	1718.35	462.303	1090.33	714.193	350.589	532.391	1373.47	302.653	838.063	1647.34	352.329	999.837	150.614	35.5143	93.0644	136.159	257.154	196.657	956.69	293.424	-1.70507	0.00864244	0.00615764	NA
LOC_Os07g41340	0	383.189	191.595	0	53.2662	26.6331	0	0	0	0	257.244	128.622	0	181.123	90.5615	0	444.712	222.356	0	219.922	#DIV/0!	4.21885e-14	0.011418	NA
LOC_Os07g43240	0	4.3055	2.15275	0	0	0	0	33.9713	16.9856	0.952773	10.3193	5.63601	9.78016	102.4	56.0899	0	17.6941	8.84705	1.78882	28.115	3.97426	0.00134304	0.0110675	NA
LOC_Os07g44140	167.429	5500.81	2834.12	21.879	189.821	105.85	30.0031	2163.35	1096.68	492.584	3134.84	1813.71	936.939	6534.04	3735.49	213.964	5476.91	2845.44	310.466	3833.3	3.62608	3.01981e-14	2.12509e-07	NA
LOC_Os07g44440	0	333.676	166.838	1.56279	1.93695	1.74987	0.833418	30.883	15.8582	0.952773	7.3709	4.16184	34.2306	98.2563	66.2434	32.0374	24.7717	28.4046	11.6028	82.8158	2.83543	0.0259104	0.00816768	NA
LOC_Os07g45260	1.46868	71.0407	36.2547	3.12557	2.90543	3.0155	0.833418	6.1766	3.50501	0	8.84508	4.42254	80.1973	84.6424	82.4199	1.14419	20.0533	10.5987	14.4615	32.2773	1.1583	0.0283072	0.00620017	NA
LOC_Os07g45570	3432.3	1920.79	2676.55	56.2603	93.9423	75.1013	286.696	1338.78	812.736	580.239	761.414	670.826	254.284	391.249	322.767	128.15	2113.85	1121	789.655	1103.34	0.482579	0.041346	6.97767e-07	NA
LOC_Os07g46320	163.023	2.15275	82.5881	51.5719	20.338	35.955	50.8385	0	25.4193	405.881	11.7934	208.837	14.6702	1.77572	8.22298	21.7397	0	10.8698	117.954	6.00999	-4.29472	2.12247e-05	0.02325	NA
LOC_Os07g46460	24126	3718.33	13922.2	6518.38	5625.88	6072.13	8855.9	3736.84	6296.37	21463.1	4602.39	13032.8	3393.71	1219.92	2306.82	4566.47	2563.28	3564.88	11487.3	3577.77	-1.6829	0.00102323	0.0161326	NA
LOC_Os07g46480	4301.76	214.737	2258.25	6938.77	2181.01	4559.89	4646.31	231.622	2438.96	3127	47.9108	1587.46	1848.45	179.939	1014.19	2240.33	327.931	1284.13	3850.44	530.525	-2.85953	1.17883e-12	0.000125006	NA
LOC_Os07g46670	1906.35	9627.09	5766.72	926.732	1409.13	1167.93	1507.65	4383.84	2945.75	6120.62	6367.72	6244.17	7412.38	9268.64	8340.51	2566.42	16380	9473.22	3406.69	7906.07	1.21459	0.00536932	0.00221847	NA
LOC_Os07g46852	688.811	5838.79	3263.8	70.3254	333.156	201.741	260.86	2413.5	1337.18	3931.14	4104.12	4017.63	3631.37	2427.4	3029.39	1203.69	8350.43	4777.06	1631.03	3911.23	1.26184	0.000204082	5.18318e-07	NA
LOC_Os07g47350	1387.9	5060.03	3223.97	1108.01	1413.01	1260.51	956.764	1525.62	1241.19	6490.29	3071.45	4780.87	3144.32	9213.6	6178.96	2349.03	16947.4	9648.21	2572.72	6205.19	1.27018	0.0227943	0.00072501	NA
LOC_Os07g47620	102.808	2574.69	1338.75	54.6975	50.3608	52.5291	35.0036	219.269	127.136	201.988	1508.09	855.037	200.493	331.467	265.98	148.745	1550	849.374	123.956	1038.98	3.06727	9.14488e-05	0.00382117	NA
LOC_Os07g47790	7.3434	3982.05	1994.69	1.56279	169.483	85.5231	6.66735	4444.06	2225.36	12.3861	5664.53	2838.46	51.8348	4437.51	2244.67	26.3164	4624.06	2325.19	17.6851	3886.95	7.77996	0	9.53018e-05	NA
LOC_Os07g48710	52.8725	845.492	449.182	20.3162	36.8021	28.5592	25.0025	350.522	187.762	122.908	429.723	276.316	420.547	1299.82	860.185	184.215	1912.14	1048.18	137.643	812.417	2.56129	2.57486e-05	0.000119004	NA
LOC_Os07g48910	665.312	6791.92	3728.62	450.082	1511.79	980.937	1190.95	10894	6042.46	878.457	5265.77	3072.11	5285.2	19930.6	12607.9	1759.77	18898.5	10329.1	1704.96	10548.8	2.62926	2.60024e-09	2.52387e-05	NA
LOC_Os07g49110	6534.15	234.111	3384.13	3786.63	1584.43	2685.53	3357.84	80.2957	1719.07	9762.11	282.305	5022.21	1723.26	52.6796	887.972	2346.74	161.606	1254.17	4585.12	399.238	-3.52164	7.77156e-16	6.03606e-05	NA
LOC_Os07g49140	2037.06	135.623	1086.34	3227.15	1840.11	2533.63	2043.54	105.002	1074.27	2208.53	251.348	1229.94	653.315	78.1315	365.723	464.542	264.232	364.387	1772.36	445.74	-1.99139	1.02711e-06	0.00020921	NA
LOC_Os08g01810	132.181	170.067	151.124	4.68836	15.4956	10.092	75.8411	145.15	110.496	85.7496	398.028	241.889	10.7582	83.4586	47.1084	4.57677	16.5145	10.5456	52.2992	138.119	1.40105	0.0481903	0.00428776	NA
LOC_Os08g02690	1395.25	10607.1	6001.19	1972.24	2687.52	2329.88	2043.54	3834.12	2938.83	2017.02	13793.2	7905.09	5797.68	9577.62	7687.65	6227.84	16679.6	11453.7	3242.26	9529.86	1.55546	0.00069231	0.0347952	NA
LOC_Os08g02996	436.198	1638.78	1037.49	0	0.968477	0.484238	20.8355	892.518	456.677	1.90555	2.94836	2.42695	18.5823	26.6357	22.609	1.14419	11.7961	6.47013	79.7775	428.941	2.42672	0.00523978	0	NA
LOC_Os08g03020	374.513	485.445	429.979	1.56279	0.968477	1.26563	20.002	1188.99	604.498	76.2219	869.766	472.994	0.978016	0.591905	0.78496	1.14419	1.17961	1.1619	79.0703	424.491	2.42452	0.0359943	3.33067e-16	NA
LOC_Os08g03070	8.81208	91.4918	50.1519	0	0	0	1.66684	29.3388	15.5028	3.81109	49.385	26.5981	0	0	0	0	0	0	2.38167	28.3693	3.57429	0.028364	0.000275405	NA
LOC_Os08g03310	527.256	466.07	496.663	40.6324	772.844	406.738	75.8411	1527.16	801.502	502.111	1941.49	1221.8	84.1094	313.71	198.91	40.0467	765.564	402.806	211.666	964.474	2.18795	7.35224e-06	0.0167284	NA
LOC_Os08g03350	1064.79	5412.55	3238.67	168.781	1715.17	941.977	220.856	2177.25	1199.05	973.734	3403.14	2188.44	1165.79	2909.81	2037.8	227.694	3374.85	1801.27	636.942	3165.46	2.31318	8.04158e-08	0.0439435	NA
LOC_Os08g04210	8.81208	831.499	420.155	3.12557	395.139	199.132	20.002	4377.66	2198.83	8.57496	8225.18	4116.88	44.9887	15017.8	7531.4	11.4419	6360.44	3185.94	16.1575	5867.96	8.50451	0	6.59614e-06	NA
LOC_Os08g04360	1.46868	358.971	180.22	0	1.93695	0.968477	0.833418	0	0.416709	0	0.73709	0.368545	91.9335	160.998	126.466	5.72096	113.242	59.4816	16.6594	105.981	2.66939	0.0139706	2.69607e-07	NA
LOC_Os08g04500	1872.57	0	936.283	1.56279	0	0.781393	230.023	1.54415	115.784	5.71664	0	2.85832	13.6922	0	6.84611	24.028	0	12.014	357.932	0.257358	-10.4417	3.73845e-12	6.82164e-08	NA
LOC_Os08g07390	286.392	566.173	426.283	23.4418	23.2434	23.3426	155.016	843.105	499.061	271.54	675.911	473.726	133.988	352.184	243.086	266.597	1000.31	633.451	189.496	576.82	1.60596	0.0230406	0.00729125	NA
LOC_Os08g08970	298.142	1413.28	855.71	50.0091	380.611	215.31	18.3352	501.848	260.092	164.83	709.817	437.324	42.0547	89.3777	65.7162	42.3351	679.453	360.894	102.618	629.065	2.61593	1.33917e-05	0.0168798	NA
LOC_Os08g09080	2.93736	31.753	17.3452	0	22.275	11.1375	0	0	0	0	0	0	0	1.18381	0.591905	0	25.9513	12.9757	0.48956	13.5272	4.78823	0.00582564	0.0228082	NA
LOC_Os08g14000	2451.23	696.414	1573.82	479.775	337.998	408.887	681.736	152.871	417.303	1613.05	171.005	892.025	107.582	35.5143	71.548	216.252	435.275	325.763	924.936	304.846	-1.60127	0.0137006	0.00109888	NA
LOC_Os08g14109	199.74	988.111	593.926	0	40.676	20.338	63.3398	287.212	175.276	100.994	676.648	388.821	13.6922	30.1872	21.9397	27.4606	383.372	205.416	67.5378	401.034	2.56996	0.00010086	7.62014e-05	NA
LOC_Os08g14190	631.532	17.222	324.377	1.56279	0.968477	1.26563	353.369	41.692	197.531	1731.19	93.6104	912.4	8.80214	2.95953	5.88083	32.0374	28.3105	30.174	459.749	30.7938	-3.90013	0.000744368	1.46102e-08	NA
LOC_Os08g15149	2.93736	0.538187	1.73777	0	0	0	0	0	0	65.7414	0	32.8707	1.95603	0	0.978016	1.14419	0	0.572096	11.9632	0.0896978	-7.05931	0.0149617	0.033341	NA
LOC_Os08g15322	64.6219	29.6003	47.1111	76.5765	28.0858	52.3312	373.371	35.5154	204.443	2666.81	283.042	1474.93	29.3405	43.2091	36.2748	42.3351	46.0046	44.1699	542.176	77.5763	-2.80507	0.0372372	7.46376e-07	NA
LOC_Os08g17390	4886.3	1535.99	3211.14	2228.53	1343.28	1785.9	2511.92	639.278	1575.6	4864.86	1149.86	3007.36	747.204	265.765	506.485	868.442	1304.64	1086.54	2684.54	1039.8	-1.36837	0.00886238	0.0356607	NA
LOC_Os08g17784	104.276	4.84368	54.56	367.255	238.245	302.75	224.19	55.5894	139.889	114.333	55.2817	84.8073	138.878	92.9291	115.904	33.1816	7.07764	20.1296	163.685	75.6611	-1.1133	0.0338394	0.0390396	NA
LOC_Os08g19694	0	13.4547	6.72734	34.3813	95.8792	65.1302	14.1681	407.655	210.912	24.7721	609.573	317.173	29.3405	667.077	348.209	5.72096	46.0046	25.8628	18.0638	306.607	4.08522	3.94392e-06	0.00246306	NA
LOC_Os08g24310	83.7147	1343.31	713.515	26.5674	92.9738	59.7706	10.8344	100.37	55.6021	22.8666	49.385	36.1258	195.603	1982.29	1088.95	41.1909	896.501	468.846	63.4629	744.139	3.55159	3.14476e-06	1.95172e-05	NA
LOC_Os08g26220	91.0581	0.538187	45.7981	51.5719	93.9423	72.7571	222.523	0	111.261	69.5524	0	34.7762	37.1646	0	18.5823	2.28838	0	1.14419	79.0264	15.7467	-2.32728	4.71257e-06	6.01806e-05	NA
LOC_Os08g26230	64.6219	1.61456	33.1182	25.0046	49.3923	37.1984	8.33418	0	4.16709	4.76387	0.73709	2.75048	105.626	1.77572	53.7007	0	0	0	34.725	8.91995	-1.96087	0.014357	0.00165557	NA
LOC_Os08g27840	5741.07	342.287	3041.68	934.546	595.613	765.08	2036.87	152.871	1094.87	4062.63	246.925	2154.78	1023	39.0657	531.035	1295.23	211.149	753.188	2515.56	264.652	-3.24871	6.97576e-10	0.0290877	NA
LOC_Os08g28350	233.52	19.3747	126.447	6.25114	1.93695	4.09405	5.00051	4.63245	4.81648	3.81109	1.47418	2.64264	24.4504	1.18381	12.8171	28.6048	5.89803	17.2514	50.273	5.75003	-3.12814	0.0460492	0.0335799	NA
LOC_Os08g28400	437.666	19.3747	228.521	3.12557	1.93695	2.53126	0	0	0	10.4805	0.73709	5.6088	11.7362	0	5.86809	18.3071	9.43685	13.872	80.2193	5.2476	-3.93422	0.0126044	2.07577e-05	NA
LOC_Os08g28650	1.46868	55.9714	28.7201	0	0	0	0	27.7947	13.8973	2.85832	225.549	114.204	0.978016	49.72	25.349	0	112.063	56.0313	0.884169	78.5164	6.47253	1.4791e-06	0.0267651	NA
LOC_Os08g29170	2129.58	292.774	1211.18	915.792	337.998	626.895	935.929	213.093	574.511	3673.89	334.639	2004.27	170.175	24.86	97.5174	75.5167	169.863	122.69	1316.82	228.871	-2.52445	0.000396694	0.000327897	NA
LOC_Os08g29570	186.522	798.131	492.327	39.0696	178.2	108.635	46.6714	382.949	214.81	366.818	238.817	302.817	688.523	1348.95	1018.74	84.6702	442.352	263.511	235.379	564.9	1.26301	0.00568904	0.0077793	NA
LOC_Os08g30340	967.86	131.856	549.858	532.91	315.723	424.317	245.025	18.5298	131.777	27.6304	4.42254	16.0265	21.5163	2.95953	12.2379	12.5861	107.344	59.9651	301.255	96.8059	-1.63782	0.0179406	5.04311e-06	NA
LOC_Os08g31090	11.7494	248.104	129.927	3.12557	5.81086	4.46822	6.66735	47.8686	27.268	57.1664	155.526	106.346	144.746	511.998	328.372	14.8745	235.921	125.398	39.7216	200.871	2.33828	0.00229711	0.00204279	NA
LOC_Os08g31730	0	5.92006	2.96003	0	0	0	11.6679	40.1479	25.9079	0	0	0	0	4.14334	2.07167	0	2.35921	1.17961	1.94464	8.76175	2.17171	0.0400389	0.00251407	NA
LOC_Os08g31980	70.4966	504.819	287.658	217.227	137.524	177.375	274.195	883.253	578.724	907.993	1020.87	964.431	605.392	2789.06	1697.22	978.284	2155.14	1566.71	508.931	1248.44	1.29459	0.0207828	0.00176519	NA
LOC_Os08g32750	117.494	10.7637	64.129	140.651	0.968477	70.8096	30.8365	0	15.4182	5.71664	1.47418	3.59541	1.95603	0	0.978016	0	5.89803	2.94902	49.4424	3.18407	-3.9568	0.0113231	0.0496261	NA
LOC_Os08g32780	0	0	0	34.3813	0.968477	17.6749	3.33367	0	1.66684	1.90555	0	0.952773	0	0	0	0	0	0	6.60342	0.161413	-5.35439	0.0272745	0.0189988	NA
LOC_Os08g34400	57.2785	6.99643	32.1375	0	0	0	16.6684	0	8.33418	67.6469	0	33.8234	4.89008	0	2.44504	6.86515	7.07764	6.9714	25.5582	2.34568	-3.44571	0.007709	0.0410788	NA
LOC_Os08g34580	93.9955	714.174	404.085	48.4464	51.3293	49.8878	39.1707	55.5894	47.38	201.035	199.751	200.393	425.437	858.262	641.85	254.011	2359.21	1306.61	177.016	706.386	1.99658	0.0399775	6.47197e-05	NA
LOC_Os08g34900	32.3109	475.219	253.765	20.3162	45.5184	32.9173	39.1707	841.561	440.366	15.2444	391.395	203.32	496.832	1334.15	915.493	35.47	1459.17	747.321	106.557	757.837	2.83026	1.54073e-07	4.28289e-05	NA
LOC_Os08g35190	2129.58	1455.8	1792.69	1525.28	753.475	1139.38	1365.97	132.797	749.385	779.369	117.197	448.283	4999.62	452.807	2726.21	2568.71	953.122	1760.92	2228.09	644.199	-1.79023	4.72429e-05	0.00966319	NA
LOC_Os08g36310	387.731	499.976	443.854	12.5023	75.5412	44.0217	37.5038	480.23	258.867	219.138	918.414	568.776	50.8568	265.765	158.311	29.749	471.842	250.796	122.914	451.961	1.87856	0.000217178	0.00524057	NA
LOC_Os08g36630	408.293	653.359	530.826	59.3859	128.807	94.0966	269.194	1480.84	875.016	256.296	560.188	408.242	460.645	804.399	632.522	82.3818	372.756	227.569	256.033	666.725	1.38076	0.0154359	0.0358779	NA
LOC_Os08g37040	873.864	98.4882	486.176	1528.4	649.848	1089.13	832.585	81.8399	457.212	529.742	67.8123	298.777	236.68	36.1062	136.393	189.936	42.4658	116.201	698.535	162.76	-2.10159	1.65358e-05	0.00089124	NA
LOC_Os08g37500	71.9653	32.8294	52.3973	1.56279	12.5902	7.07649	2.50025	189.93	96.2153	30.4887	81.0799	55.7843	0	17.1652	8.58262	1.14419	21.2329	11.1886	17.9435	59.138	1.72062	0.00933826	0.0276818	NA
LOC_Os08g37670	2435.07	18255.3	10345.2	629.803	1043.05	836.426	989.268	3451.17	2220.22	3225.14	2954.99	3090.07	8316.07	17849.5	13082.8	2574.43	19966	11270.2	3028.3	10586.7	1.80567	0.000582804	3.86592e-06	NA
LOC_Os08g38070	1.46868	18.8365	10.1526	73.4509	135.587	104.519	2.50025	35.5154	19.0078	3.81109	82.554	43.1826	2.93405	11.2462	7.09012	0	11.7961	5.89803	14.0275	49.2558	1.81204	0.00447958	0.0119482	NA
LOC_Os08g39240	189.46	94.7209	142.09	4.68836	57.1401	30.9142	58.3393	140.518	99.4284	29.536	532.916	281.226	86.0654	80.4991	83.2822	3.43258	29.4902	16.4614	61.9202	155.881	1.33196	0.0487462	0.0353263	NA
LOC_Os08g39300	15725.1	4550.37	10137.8	3363.11	2890.9	3127.01	7940.81	2198.87	5069.84	16731.7	3874.14	10302.9	1937.45	848.2	1392.82	2429.12	3179.04	2804.08	8021.22	2923.59	-1.45608	0.0100096	0.00361745	NA
LOC_Os08g39330	271.706	1258.28	764.993	225.041	351.557	288.299	2291.07	10779.7	6535.39	407.787	1585.48	996.633	1265.55	1236.49	1251.02	807.8	1995.89	1401.85	878.159	2867.9	1.70744	0.00348392	2.8429e-06	NA
LOC_Os08g40180	500.82	3852.88	2176.85	1776.89	2655.56	2216.23	1115.95	3713.68	2414.81	377.298	3100.2	1738.75	5054.39	8851.94	6953.16	6759.89	6584.56	6672.22	2597.54	4793.14	0.883826	0.00134313	0.000746742	NA
LOC_Os08g40420	9746.16	1294.88	5520.52	3885.08	2411.51	3148.3	5222.2	1290.91	3256.55	8028.07	1015.71	4521.89	838.16	554.023	696.091	636.171	1016.82	826.496	4725.97	1263.97	-1.90264	0.00295165	0.0139617	NA
LOC_Os08g40690	8.81208	1098.98	553.895	6.25114	204.349	105.3	7.50076	4533.62	2270.56	10.4805	4783.71	2397.1	85.0874	17534	8809.55	19.4513	3036.31	1527.88	22.9305	5198.5	7.82468	0	4.85187e-08	NA
LOC_Os08g41860	22.0302	0	11.0151	0	0	0	0	0	0	16.1971	0.73709	8.46712	0	0	0	0	0	0	6.37122	0.122848	-5.69662	0.0273369	0.0178323	NA
LOC_Os08g42690	113.088	17.7602	65.4242	276.613	154.956	215.785	78.3413	18.5298	48.4356	22.8666	4.42254	13.6445	53.7909	5.91905	29.855	89.247	53.0823	71.1646	105.658	42.445	-1.31573	0.0251349	0.0445556	NA
LOC_Os08g42800	0	33.3676	16.6838	0	2.90543	1.45272	0	0	0	0	0	0	4.89008	39.6576	22.2739	0	5.89803	2.94902	0.815013	13.6381	4.06468	0.00977805	0.0100707	NA
LOC_Os08g43020	267.3	19.9129	143.606	21.879	14.5272	18.2031	777.579	214.637	496.108	411.598	31.6949	221.646	15.6483	7.10286	11.3756	9.15354	10.6165	9.885	250.526	49.7485	-2.33224	0.0236486	4.41267e-05	NA
LOC_Os08g43210	10.2808	363.814	187.048	1.56279	28.0858	14.8243	6.66735	243.976	125.321	9.52773	539.55	274.539	62.593	437.418	250.005	54.9212	198.174	126.548	24.2588	301.836	3.63719	1.10178e-06	0.0367334	NA
LOC_Os08g43320	5350.4	1020.94	3185.67	7099.73	3128.18	5113.96	5850.6	1111.79	3481.19	7628.86	1309.07	4468.96	1879.75	580.659	1230.2	1754.05	897.68	1325.86	4927.23	1341.39	-1.87705	4.26594e-05	0.0435561	NA
LOC_Os08g43400	14705.9	2526.25	8616.07	5791.68	5176.51	5484.1	4206.26	1278.56	2742.41	12025.9	2217.9	7121.9	1485.61	777.763	1131.68	1371.89	2080.83	1726.36	6597.87	2342.97	-1.49366	0.00835276	0.00287291	NA
LOC_Os08g43600	210.021	13.9929	112.007	678.249	283.764	481.006	475.882	12.3532	244.118	121.955	3.68545	62.8202	133.988	2.36762	68.1779	303.211	10.6165	156.914	320.551	54.4632	-2.5572	1.1068e-07	0.000134813	NA
LOC_Os08g44040	204.146	2.69093	103.419	6.25114	2.90543	4.57829	14.1681	0	7.08406	11.4333	3.68545	7.55936	0.978016	0	0.489008	1.14419	1.17961	1.1619	39.6869	1.74357	-4.50855	0.0332078	0.02998	NA
LOC_Os08g44340	840.085	4310.34	2575.21	440.706	490.049	465.377	427.544	2382.62	1405.08	481.15	860.921	671.036	2154.57	7220.65	4687.61	1200.26	2255.41	1727.83	924.052	2920	1.65992	0.00298481	0.00172814	NA
LOC_Os08g44950	1.46868	98.4882	49.9784	1.56279	1.93695	1.74987	0	9.26489	4.63245	3.81109	11.0563	7.43372	44.0107	201.84	122.925	1.14419	27.1309	14.1376	8.66624	58.2862	2.74967	0.00641789	0.0044842	NA
LOC_Os09g04624	749.026	61.8915	405.459	7.81393	11.6217	9.71782	11.6679	3.0883	7.37808	86.7024	0.73709	43.7197	11.7362	1.18381	6.46	13.7303	9.43685	11.5836	146.78	14.6599	-3.32371	0.0153998	0.000100579	NA
LOC_Os09g04920	14.6868	0	7.3434	0	0	0	5.00051	0	2.50025	57.1664	2.21127	29.6888	0.978016	0	0.489008	3.43258	0	1.71629	13.544	0.368545	-5.19967	0.00192221	0.0349165	NA
LOC_Os09g06540	27.9049	0	13.9525	0	0	0	0	0	0	0	0	0	0	0	0	0	0	0	4.65082	0	#NUM!	0.0386588	0.013647	NA
LOC_Os09g08920	0	0	0	0	0	0	0	0	0	32.3943	0	16.1971	0	0	0	0	0	0	5.39905	0	#NUM!	0.0410502	0.0107296	NA
LOC_Os09g09230	1.46868	0	0.73434	23.4418	1.93695	12.6894	13.3347	0	6.66735	143.869	0	71.9344	0	0.591905	0.295953	0	0	0	30.3523	0.421476	-6.17021	0.0103664	0.0289337	NA
LOC_Os09g10274	3369.15	3969.67	3669.41	525.096	1291.95	908.522	426.71	1621.36	1024.03	738.399	2160.41	1449.4	400.008	1427.08	913.546	232.271	3746.43	1989.35	948.606	2369.48	1.32069	0.000348165	0.00718965	NA
LOC_Os09g10730	124.838	30.1385	77.4881	396.948	265.363	331.155	201.687	15.4415	108.564	72.4108	13.2676	42.8392	63.571	14.2057	38.8884	49.2003	55.4415	52.3209	151.442	65.6429	-1.20606	0.0318244	0.0430887	NA
LOC_Os09g11480	361.295	307.843	334.569	23.4418	127.839	75.6404	123.346	1534.88	829.115	248.674	565.348	407.011	72.3732	446.888	259.631	9.15354	345.625	177.389	139.714	554.738	1.98933	0.000328701	0.0141876	NA
LOC_Os09g12480	0	26.9093	13.4547	0	0	0	0	0	0	0	0.73709	0.368545	0	0.591905	0.295953	0	0	0	0	4.70639	#DIV/0!	0.0309545	0.0449872	NA
LOC_Os09g14100	27.9049	263.173	145.539	4.68836	142.366	73.5272	0	1.54415	0.772074	0	0	0	0.978016	423.804	212.391	2.28838	311.416	156.852	5.97661	190.384	4.99344	1.83169e-06	2.22899e-06	NA
LOC_Os09g14670	734.34	372.425	553.383	251.608	165.61	208.609	45.0046	6.1766	25.5906	156.255	14.7418	85.4983	314.921	59.7824	187.352	291.769	122.679	207.224	298.983	123.569	-1.27474	0.0081643	0.00348289	NA
LOC_Os09g14700	279.049	16.1456	147.597	84.3904	50.3608	67.3756	60.8395	4.63245	32.736	427.795	11.0563	219.426	8.80214	0	4.40107	6.86515	7.07764	6.9714	144.624	14.8788	-3.28097	0.00169245	0.00644595	NA
LOC_Os09g15950	32.3109	49.5132	40.9121	0	44.5499	22.275	0.833418	0	0.416709	5.71664	292.625	149.171	1.95603	23.6762	12.8161	0	107.344	53.6721	6.80284	86.2847	3.6649	0.00142068	0.0185118	NA
LOC_Os09g16449	226.177	2.15275	114.165	0	0	0	68.3403	0	34.1702	163.877	0	81.9385	107.582	0.591905	54.0868	64.0748	8.25724	36.166	105.008	1.83365	-5.83964	4.81541e-07	0.0179505	NA
LOC_Os09g16510	276.112	2256.08	1266.1	32.8185	166.578	99.6983	86.6755	200.739	143.707	1516.81	1220.62	1368.72	1486.58	1515.28	1500.93	223.117	2325	1274.06	603.687	1280.72	1.08508	0.0035864	1.71779e-06	NA
LOC_Os09g16520	20.5615	401.487	211.025	403.199	945.233	674.216	3.33367	453.98	228.657	7.62219	719.4	363.511	5.86809	428.539	217.204	5.72096	277.207	141.464	74.3842	537.641	2.85358	3.86203e-11	1.37693e-05	NA
LOC_Os09g17146	2.93736	341.211	172.074	3.12557	0.968477	2.04702	10.001	13.8973	11.9492	29.536	75.9202	52.7281	144.746	455.767	300.257	12.5861	351.523	182.054	33.8221	206.548	2.61044	0.0203556	0.00077891	NA
LOC_Os09g17660	276.112	58.6624	167.387	1365.87	552.032	958.953	285.862	58.6777	172.27	256.296	90.662	173.479	126.164	46.1686	86.1663	75.5167	87.2909	81.4038	397.638	148.916	-1.41696	0.0256746	0.00246217	NA
LOC_Os09g18530	0	5.38187	2.69093	101.581	112.343	106.962	0.833418	23.1622	11.9978	0	108.352	54.1761	0	10.6543	5.32715	0	1.17961	0.589803	17.0691	43.5123	1.35004	0.00113567	2.76645e-05	NA
LOC_Os09g18594	1227.82	181.907	704.862	18.7534	27.1174	22.9354	167.517	106.546	137.032	668.847	181.324	425.085	1498.32	58.0067	778.163	90.3912	179.3	134.846	611.941	122.367	-2.32218	0.0455804	0.00734922	NA
LOC_Os09g19820	1288.03	430.55	859.291	15.6279	7.74781	11.6878	660.067	213.093	436.58	1433.92	608.836	1021.38	293.405	155.079	224.242	458.821	364.498	411.66	691.646	296.634	-1.22135	0.0457872	5.99532e-06	NA
LOC_Os09g19970	8.81208	728.167	368.49	3.12557	7.74781	5.43669	2.50025	131.253	66.8765	18.1027	86.2395	52.1711	37.1646	1250.7	643.93	14.8745	644.065	329.47	14.0966	474.695	5.07358	3.17665e-08	0.00171615	NA
LOC_Os09g20684	765.182	213.122	489.152	306.306	76.5097	191.408	112.511	35.5154	74.0134	431.606	12.5305	222.068	21.5163	4.73524	13.1258	16.0187	86.1112	51.065	275.523	71.4207	-1.94776	0.0233491	0.00443225	NA
LOC_Os09g20810	2.93736	0	1.46868	67.1998	15.4956	41.3477	4.16709	0	2.08355	5.71664	0.73709	3.22686	1.95603	0	0.978016	1.14419	0	0.572096	13.8535	2.70545	-2.35631	0.0127786	0.00457971	NA
LOC_Os09g25100	158.617	3.76731	81.1923	529.784	190.79	360.287	435.878	117.355	276.617	526.884	75.9202	301.402	265.042	19.5329	142.288	60.6422	15.3349	37.9885	329.475	70.4501	-2.22549	0.000170729	0.0173235	NA
LOC_Os09g25150	1621.42	114.096	867.759	393.822	463.9	428.861	195.02	32.4271	113.724	1207.16	52.3334	629.749	95.8455	11.2462	53.5459	102.977	47.1842	75.0808	602.708	120.198	-2.32605	0.000190263	0.000178395	NA
LOC_Os09g25760	549.286	3868.49	2208.89	95.3299	225.655	160.493	208.355	398.39	303.372	2443.86	1270.01	1856.93	2428.41	1996.5	2212.45	743.725	4079.08	2411.4	1078.16	1973.02	0.871831	0.0417884	4.29423e-06	NA
LOC_Os09g25910	0	0	0	0	0	0	0	26.2505	13.1253	0	0	0	0	58.0067	29.0034	0	1.17961	0.589803	0	14.2395	#DIV/0!	0.0018502	0.00860821	NA
LOC_Os09g26620	1342.37	337.443	839.908	704.816	337.03	520.923	567.558	399.935	483.746	537.364	66.3381	301.851	205.383	24.86	115.122	105.266	172.222	138.744	577.127	222.971	-1.37203	0.0167466	0.0329784	NA
LOC_Os09g27750	678.53	395.567	537.049	1951.92	1067.26	1509.59	565.891	450.891	508.391	919.426	34.6432	477.035	5658.8	4522.75	5090.77	613.287	312.596	462.941	1731.31	1130.62	-0.614752	0.0221734	9.30123e-08	NA
LOC_Os09g27950	20.5615	254.562	137.562	10.9395	15.4956	13.2176	2.50025	21.6181	12.0592	43.8276	20.6385	32.233	60.637	520.877	290.757	29.749	273.669	151.709	28.0358	184.477	2.7181	0.0153564	0.0236182	NA
LOC_Os09g28440	7.3434	402.564	204.954	0	0.968477	0.484238	0.833418	3.0883	1.96086	1886.49	985.489	1435.99	53.7909	520.877	287.334	132.726	796.234	464.48	346.864	451.537	0.380472	0.00100998	0	NA
LOC_Os09g28520	27.9049	594.158	311.032	53.1347	39.7075	46.4211	142.515	409.199	275.857	12.3861	254.296	133.341	602.458	811.502	706.98	975.996	1271.62	1123.81	302.399	563.413	0.89774	0.0123391	3.16396e-05	NA
LOC_Os09g28630	740.214	19.3747	379.795	348.501	74.5727	211.537	267.527	0	133.764	858.449	3.68545	431.067	162.351	7.69477	85.0227	107.554	7.07764	57.3159	414.099	18.7342	-4.46623	1.06038e-09	0.0366656	NA
LOC_Os09g29710	4.40604	72.1171	38.2615	39.0696	286.669	162.869	4.16709	4.63245	4.39977	7.62219	12.5305	10.0764	34.2306	190.593	112.412	3.43258	40.1066	21.7696	15.488	101.108	2.70668	0.0170589	0.0335679	NA
LOC_Os09g30490	36.717	1648.47	842.592	37.5069	88.1314	62.8191	34.1702	217.725	125.948	400.165	1070.99	735.578	263.086	3992.99	2128.04	131.582	2543.23	1337.41	150.538	1593.59	3.40408	6.40168e-08	2.29734e-05	NA
LOC_Os09g31000	2.93736	696.414	349.676	0	54.2347	27.1174	1.66684	633.101	317.384	3.81109	1368.04	685.925	4.89008	2036.15	1020.52	0	659.4	329.7	2.21756	907.89	8.6774	0	0.00668486	NA
LOC_Os09g31031	29.3736	111.405	70.3891	14.0651	22.275	18.17	42.5043	521.922	282.213	28.5832	370.019	199.301	171.153	878.387	524.77	61.7864	162.786	112.286	57.9109	344.466	2.57245	0.00171726	0.0175756	NA
LOC_Os09g31080	2319.04	12602.2	7460.62	3355.3	6093.66	4724.48	7084.06	30405.8	18744.9	1122.37	7454.19	4288.28	9479.91	18811.3	14145.6	7116.88	18525.7	12821.3	5079.59	15648.8	1.62327	7.40935e-05	0.00900083	NA
LOC_Os09g31200	699.091	2389.01	1544.05	439.143	649.848	544.495	460.047	1178.19	819.116	1365.32	1865.57	1615.45	2464.6	4943	3703.8	795.214	4471.89	2633.55	1037.24	2582.92	1.31626	0.00731271	0.0107312	NA
LOC_Os09g31430	1758.01	161.994	960.002	489.152	209.191	349.171	2138.55	662.44	1400.5	6456.94	1474.18	3965.56	862.61	56.8229	459.716	645.324	129.757	387.541	2058.43	449.064	-2.19655	2.26378e-06	3.47822e-06	NA
LOC_Os09g31502	704.966	45.2077	375.087	646.993	67.7934	357.393	651.733	12.3532	332.043	1668.31	30.2207	849.263	91.9335	4.73524	48.3344	322.662	62.5191	192.591	681.099	37.1382	-4.19689	1.11513e-09	0.0391634	NA
LOC_Os09g33470	418.574	118.401	268.487	1454.95	954.918	1204.94	380.872	245.52	313.196	959.443	293.362	626.402	578.985	146.792	362.889	235.704	199.353	217.529	671.422	326.391	-1.04062	0.0376671	0.0441615	NA
LOC_Os09g33555	0	11.3019	5.65096	0	2.90543	1.45272	1.66684	205.372	103.519	0.952773	8.10799	4.53038	19.5603	53.2715	36.4159	10.2977	37.7474	24.0226	5.41294	53.1177	3.29471	0.00471665	0.0212422	NA
LOC_Os09g33640	0	91.4918	45.7459	1.56279	0.968477	1.26563	0	6.1766	3.0883	32.3943	39.0658	35.73	41.0767	109.502	75.2896	4.57677	141.553	73.0648	13.2684	64.793	2.28784	0.0199016	0.0150194	NA
LOC_Os09g34320	1916.63	178.678	1047.65	345.376	282.795	314.085	348.369	196.107	272.238	462.095	114.249	288.172	133.988	36.6981	85.3431	66.3631	101.446	83.9046	545.47	151.662	-1.84664	0.0428865	0.0208624	NA
LOC_Os09g35030	42.5917	107.637	75.1145	12.5023	5.81086	9.15657	45.838	29.3388	37.5884	1912.22	164.371	1038.29	693.413	88.1939	390.804	483.993	167.504	325.749	531.759	93.8093	-2.50297	0.0338143	6.3151e-06	NA
LOC_Os09g36470	5.87472	402.564	204.219	0	0	0	11.6679	74.1191	42.8935	2.85832	234.395	118.626	6.84611	3.55143	5.19877	6.86515	11.7961	9.33061	5.68536	121.071	4.41246	0.0186601	0.00462261	NA
LOC_Os09g36930	3831.78	53.2805	1942.53	382.882	25.1804	204.031	349.202	0	174.601	1505.38	25.7981	765.59	425.437	7.69477	216.566	360.421	14.1553	187.288	1142.52	21.0182	-5.76444	0	0.000423762	NA
LOC_Os09g37080	326.047	847.106	586.577	20.3162	23.2434	21.7798	40.8375	112.723	76.7802	389.684	563.874	476.779	115.406	1443.66	779.531	32.0374	1403.73	717.884	154.055	732.389	2.24917	0.00209575	0.000171809	NA
LOC_Os09g38239	1092.7	66.197	579.447	81.2648	47.4554	64.3601	181.685	43.2362	112.461	426.842	30.2207	228.532	38.1426	9.47048	23.8065	22.8838	18.8737	20.8788	307.253	35.9089	-3.09701	0.00524482	0.0162476	NA
LOC_Os09g38777	1812.35	343.901	1078.13	251.608	132.681	192.145	1459.32	668.616	1063.97	2508.65	639.794	1574.22	158.439	92.3372	125.388	191.08	88.4705	139.775	1063.57	327.633	-1.69877	0.0091698	4.77935e-05	NA
LOC_Os09g38800	2.93736	70.5025	36.7199	0	10.6532	5.32662	0	29.3388	14.6694	1.90555	92.8733	47.3894	33.2525	139.69	86.4711	2.28838	83.752	43.0202	6.73064	71.1349	3.40174	3.80519e-05	0.0341656	NA
LOC_Os09g38840	22.0302	94.7209	58.3755	1.56279	19.3695	10.4662	2.50025	27.7947	15.1475	51.4498	43.4883	47.469	114.428	472.932	293.68	2.28838	212.329	107.309	32.3765	145.106	2.16408	0.00417506	0.00426062	NA
LOC_Os09g38910	30.8423	482.754	256.798	4.68836	96.8477	50.768	8.33418	537.364	272.849	75.2691	794.583	434.926	77.2632	880.755	479.009	20.5955	502.512	261.554	36.1654	549.136	3.92448	1.94266e-09	0.03705	NA
LOC_Os09g39190	14.6868	235.188	124.937	1.56279	12.5902	7.07649	1.66684	71.0308	36.3488	5.71664	10.3193	8.01795	68.4611	99.4401	83.9506	3.43258	104.985	54.2088	15.9211	88.9255	2.48166	0.00422564	0.0453676	NA
LOC_Os10g02000	48.4664	16.6838	32.5751	1.56279	0	0.781393	10.001	0	5.00051	46.6859	2.21127	24.4486	7.82413	0	3.91206	4.57677	1.17961	2.87819	19.8528	3.34578	-2.56893	0.00852558	0.0439518	NA
LOC_Os10g02260	411.23	21.5275	216.379	890.788	752.506	821.647	880.09	172.945	526.517	1666.4	188.695	927.548	117.362	19.5329	68.4474	82.3818	162.786	122.584	674.709	219.665	-1.61896	0.00217905	0.000331882	NA
LOC_Os10g02880	49.9351	3.76731	26.8512	57.8231	8.71629	33.2697	44.1712	3.0883	23.6297	87.6551	72.9719	80.3135	9.78016	0.591905	5.18603	10.2977	0	5.14887	43.2771	14.8559	-1.54256	0.00541923	0.0238795	NA
LOC_Os10g03390	0	40.364	20.182	0	0	0	0	0	0	0	0	0	0	0.591905	0.295953	0	0	0	0	6.82599	#DIV/0!	0.035717	0.00883543	NA
LOC_Os10g05160	0	0	0	1.56279	32.9282	17.2455	0	1.54415	0.772074	0	0	0	43.0327	192.961	117.997	3.43258	286.644	145.038	8.00468	85.6796	3.42004	0.00360868	4.12565e-08	NA
LOC_Os10g07300	0	12.9165	6.45824	0	2.90543	1.45272	0	0	0	0.952773	81.817	41.3849	0.978016	11.8381	6.40806	0	187.557	93.7787	0.321798	49.5057	7.2653	0.000107889	0.0294522	NA
LOC_Os10g08319	96.9328	4.84368	50.8883	114.083	9.68477	61.8841	26.6694	0	13.3347	943.245	20.6385	481.942	21.5163	2.95953	12.2379	9.15354	3.53882	6.34618	201.933	6.94422	-4.86192	3.3759e-05	0.001164	NA
LOC_Os10g08474	95.4641	0.538187	48.0012	7.81393	0.968477	4.3912	473.382	23.1622	248.272	180.074	2.94836	91.5112	2.93405	0.591905	1.76298	5.72096	1.17961	3.45028	127.565	4.89813	-4.70286	9.11218e-05	0.000364398	NA
LOC_Os10g08780	8.81208	647.977	328.395	54.6975	94.9107	74.8041	26.6694	430.818	228.743	13.3388	215.967	114.653	322.745	609.07	465.908	46.9119	335.008	190.96	78.8625	388.959	2.30221	6.64181e-05	0.0470762	NA
LOC_Os10g09110	70.4966	292.236	181.366	15.6279	22.275	18.9514	21.6689	631.557	326.613	58.1192	49.385	53.7521	1.95603	29.0034	15.4797	3.43258	20.0533	11.7429	28.5502	174.085	2.60822	0.0157233	0.00429938	NA
LOC_Os10g10540	0	3.22912	1.61456	0	80.3836	40.1918	0	0	0	0	0	0	0	0	0	0	8.25724	4.12862	0	15.3117	#DIV/0!	0.0032807	0.00887953	NA
LOC_Os10g11889	3351.53	1230.3	2290.91	20.3162	30.0228	25.1695	825.084	1324.88	1074.98	154.349	29.4836	91.9164	65.5271	2.95953	34.2433	226.55	122.679	174.615	773.892	456.72	-0.760822	0.0413089	3.55271e-15	NA
LOC_Os10g12750	1204.32	198.053	701.185	254.734	184.011	219.372	287.529	33.9713	160.75	457.331	63.3897	260.36	125.186	20.7167	72.9513	42.3351	88.4705	65.4028	395.239	98.1019	-2.01037	0.00994099	0.048327	NA
LOC_Os10g16974	8718.08	1886.35	5302.21	3428.75	2967.41	3198.08	2020.21	671.705	1345.96	5385.07	1913.48	3649.28	2051.88	510.222	1281.05	1053.8	2165.76	1609.78	3776.3	1685.82	-1.16352	0.0176318	0.0416606	NA
LOC_Os10g18340	4466.25	4311.95	4389.1	386.008	1406.23	896.118	761.744	2430.49	1596.12	2089.43	1953.29	2021.36	470.426	540.409	505.417	463.398	2210.58	1336.99	1439.54	2142.16	0.573454	0.0444225	0.000961732	NA
LOC_Os10g18760	1.46868	8.61099	5.03984	0	0	0	0	4.63245	2.31622	0	36.8545	18.4272	0	0	0	0	0	0	0.24478	8.34965	5.09216	0.0237461	0.0264921	NA
LOC_Os10g19960	10.2808	1.61456	5.94766	95.3299	53.2662	74.2981	5.00051	0	2.50025	2.85832	0	1.42916	52.8129	6.51096	29.6619	29.749	7.07764	18.4133	32.6719	11.4116	-1.51755	0.0229115	0.00750128	NA
LOC_Os10g20470	118.963	554.871	336.917	76.5765	185.948	131.262	107.511	225.446	166.478	273.446	569.033	421.24	495.854	1245.37	870.611	639.603	706.584	673.094	285.326	581.208	1.02645	0.0397352	0.0285456	NA
LOC_Os10g20550	160.086	10.7637	85.4249	0	3.87391	1.93695	92.5094	1.54415	47.0268	9.52773	0	4.76387	0	0	0	0	0	0	43.6872	2.69697	-4.0178	0.033615	0.00025977	NA
LOC_Os10g21272	17.6242	3.76731	10.6957	4.68836	0.968477	2.82842	43.3378	4.63245	23.9851	675.516	73.709	374.613	11.7362	13.6138	12.675	21.7397	14.1553	17.9475	129.107	18.4744	-2.80497	0.0468923	8.83065e-05	NA
LOC_Os10g21388	4.40604	1.07637	2.74121	7.81393	0	3.90696	17.5018	0	8.75089	256.296	22.1127	139.204	0.978016	2.36762	1.67282	10.2977	2.35921	6.32847	49.5489	4.65265	-3.41273	0.0221772	0.00293573	NA
LOC_Os10g21418	118.963	21.5275	70.2452	51.5719	22.275	36.9234	223.356	30.883	127.12	2127.54	268.301	1197.92	29.3405	37.29	33.3152	65.219	49.5435	57.3812	435.999	71.6366	-2.60556	0.0199281	6.64807e-06	NA
LOC_Os10g21700	0	6.99643	3.49822	0	0	0	0	0	0	0.952773	20.6385	10.7956	0.978016	257.479	129.228	0	14.1553	7.07764	0.321798	49.8782	7.27611	0.000313097	0.00128359	NA
LOC_Os10g21790	0	5.38187	2.69093	0	30.0228	15.0114	0	1.54415	0.772074	5.71664	978.855	492.286	3.91206	317.261	160.587	1.14419	176.941	89.0426	1.79548	251.668	7.131	1.83826e-09	4.75578e-06	NA
LOC_Os10g23180	1796.19	12.9165	904.556	1129.89	242.119	686.007	537.555	1.54415	269.549	733.635	4.42254	369.029	86.0654	0.591905	43.3286	92.6796	1.17961	46.9296	729.337	43.7956	-4.05773	1.55431e-15	5.39969e-10	NA
LOC_Os10g24004	671.186	1405.74	1038.47	9.37671	34.8652	22.1209	2134.38	2482.99	2308.69	1775.97	2747.87	2261.92	182.889	629.787	406.338	92.6796	763.205	427.942	811.081	1344.08	0.728698	0.00670889	8.05984e-11	NA
LOC_Os10g26940	531.662	3607.47	2069.56	256.297	4214.81	2235.55	88.3423	381.405	234.874	222.949	10448.2	5335.6	497.81	4368.85	2433.33	1383.33	11272.3	6327.82	496.731	5715.52	3.52435	5.11835e-12	4.58792e-05	NA
LOC_Os10g30670	1.46868	48.4368	24.9528	0	3.87391	1.93695	0	0	0	0	3.68545	1.84272	5.86809	8.87858	7.37334	18.3071	60.1599	39.2335	4.27397	20.8391	2.28564	0.0450733	0.0103451	NA
LOC_Os10g30790	594.815	3043.45	1819.13	123.46	336.061	229.761	178.352	643.91	411.131	1300.54	1480.08	1390.31	836.203	1173.16	1004.68	255.155	1437.94	846.547	548.087	1352.43	1.30308	0.00451043	0.00647782	NA
LOC_Os10g31040	4923.01	1400.9	3161.96	1898.78	1204.79	1551.78	1732.68	251.696	992.186	2737.32	336.113	1536.72	331.547	81.6829	206.615	213.964	569.75	391.857	1972.88	640.821	-1.62231	0.00302852	0.000222776	NA
LOC_Os10g31330	788.681	2815.79	1802.24	87.516	130.744	109.13	120.846	3065.14	1592.99	172.452	996.545	584.499	139.856	2509.68	1324.77	64.0748	1027.44	545.756	228.904	1757.56	2.94075	1.31238e-07	0.00160226	NA
LOC_Os10g31420	0	156.074	78.0371	0	29.0543	14.5272	5.00051	551.261	278.131	1.90555	168.056	84.981	1.95603	1137.64	569.799	2.28838	117.961	60.1245	1.85841	360.008	7.59782	7.71605e-14	0.0222217	NA
LOC_Os10g31490	0	140.467	70.2334	0	2.90543	1.45272	0	24.7064	12.3532	0	0.73709	0.368545	1.95603	577.699	289.828	0	23.5921	11.7961	0.326005	128.351	8.62099	3.69635e-08	0.00015986	NA
LOC_Os10g31540	0	375.116	187.558	10.9395	1.93695	6.43823	0.833418	27.7947	14.314	0	5.89672	2.94836	0.978016	9.47048	5.22425	0	0	0	2.12516	70.0359	5.04245	0.00671247	0.00138661	NA
LOC_Os10g31850	445.01	3118.79	1781.9	281.301	443.562	362.432	467.548	1826.73	1147.14	1381.52	5119.09	3250.3	1366.29	2525.66	1945.97	1029.77	4742.02	2885.89	828.574	2962.64	1.83818	0.000270982	0.0129103	NA
LOC_Os10g32110	196.803	187.827	192.315	4.68836	56.1717	30.43	11.6679	71.0308	41.3494	92.419	170.268	131.343	4.89008	28.4114	16.6508	2.28838	62.5191	32.4038	52.1261	96.038	0.881599	0.0146611	0.0139946	NA
LOC_Os10g32980	8317.13	1892.8	5104.97	1381.5	1576.68	1479.09	2304.4	768.986	1536.69	6006.28	2123.56	4064.92	1265.55	291.217	778.385	443.947	1166.63	805.289	3286.47	1303.31	-1.33436	0.0361579	0.0027227	NA
LOC_Os10g35460	91.0581	1758.8	924.927	4.68836	77.4781	41.0833	53.3388	205.372	129.355	212.468	338.324	275.396	2809.84	3418.84	3114.34	757.455	2284.9	1521.18	654.808	1347.29	1.04091	0.000298597	3.14748e-13	NA
LOC_Os10g36848	2877.14	84.4954	1480.82	932.983	100.722	516.852	654.233	27.7947	341.014	892.749	67.8123	480.28	72.3732	11.2462	41.8097	97.2563	47.1842	72.2203	921.123	56.5424	-4.02599	7.68376e-08	0.00143438	NA
LOC_Os10g37760	104.276	2225.4	1164.84	23.4418	88.1314	55.7866	63.3398	111.179	87.2593	520.214	708.343	614.279	1547.22	2085.87	1816.55	276.895	2664.73	1470.81	422.565	1313.94	1.63666	0.00131596	3.66551e-08	NA
LOC_Os10g38580	8245.17	954.744	4599.95	3189.65	1511.79	2350.72	2912.8	148.238	1530.52	8641.65	404.662	4523.16	1421.06	146.201	783.629	1578.99	585.085	1082.03	4331.55	625.12	-2.79268	5.45455e-09	0.00377415	NA
LOC_Os10g38700	630.063	121.63	375.847	100.018	91.0368	95.5275	194.186	30.883	112.535	964.207	19.9014	492.054	83.1313	0.591905	41.8616	138.447	46.0046	92.2259	351.676	51.6747	-2.76672	0.000246216	0.0361827	NA
LOC_Os10g38710	1893.13	54.3569	973.742	371.943	162.704	267.324	853.42	72.575	462.998	1408.2	98.0329	753.116	191.691	10.6543	101.173	218.541	37.7474	128.144	822.82	72.6784	-3.50098	9.66332e-08	0.0239431	NA
LOC_Os10g38720	1.46868	27.9857	14.7272	0	0	0	0	7.72074	3.86037	2.85832	8.84508	5.8517	20.5383	34.9224	27.7304	1.14419	60.1599	30.6521	4.33492	23.2723	2.42454	0.0226619	0.0370897	NA
LOC_Os10g39150	4596.97	434.855	2515.91	776.704	766.065	771.385	1878.52	208.46	1043.49	4338.93	391.395	2365.16	871.412	61.5581	466.485	1088.13	220.586	654.357	2258.44	347.153	-2.70168	2.29121e-07	0.0250136	NA
LOC_Os10g39640	77.84	810.51	444.175	71.8881	98.7846	85.3364	66.6735	219.269	142.971	132.435	409.085	270.76	645.49	911.534	778.512	546.924	1650.27	1098.6	256.875	683.242	1.41133	0.00899813	0.00106655	NA
LOC_Os10g39840	417.105	326.68	371.892	40.6324	145.272	92.952	24.1691	1286.28	655.223	95.2773	995.808	545.543	39.1206	67.4772	53.2989	40.0467	175.761	107.904	109.392	499.546	2.19111	0.00233405	0.00793794	NA
LOC_Os10g40290	828.335	94.1827	461.259	1339.31	476.491	907.899	790.081	401.479	595.78	1183.34	277.146	730.245	209.295	32.5548	120.925	61.7864	114.422	88.1041	735.358	232.712	-1.6599	0.00658666	0.00615021	NA
LOC_Os10g40430	95.4641	382.113	238.788	309.432	332.188	320.81	284.196	5356.65	2820.42	128.624	783.526	456.075	429.349	3150.71	1790.03	100.689	1098.21	599.451	224.626	1850.57	3.04237	2.38258e-06	0.0033552	NA
LOC_Os10g40470	0	2.15275	1.07637	0	0	0	0.833418	30.883	15.8582	0	1.47418	0.73709	11.7362	102.4	57.0679	0	10.6165	5.30823	2.09493	24.5877	3.55296	0.00451728	0.00151198	NA
LOC_Os10g40510	193.866	34141.5	17167.7	31.2557	3167.89	1599.57	115.845	40864.4	20490.1	90.5135	26458.6	13274.5	343.284	62014.5	31178.9	113.275	47285.7	23699.5	148.006	35655.4	7.91232	0	0.000686157	NA
LOC_Os10g40520	1132.35	2365.87	1749.11	3.12557	4.84238	3.98398	470.048	9130.55	4800.3	769.841	3985.44	2377.64	271.888	4106.05	2188.97	109.842	3588.36	1849.1	459.516	3863.52	3.07173	1.58112e-08	6.67133e-13	NA
LOC_Os10g40530	439.135	7171.88	3805.51	106.269	1401.39	753.828	420.876	15427.6	7924.23	151.491	6180.5	3165.99	951.609	16279.8	8615.68	136.159	12785.8	6460.95	367.59	9874.48	4.74754	0	0.000739295	NA
LOC_Os10g40614	315.766	1263.66	789.715	3269.35	3594.99	3432.17	1056.77	5983.58	3520.18	262.013	2167.78	1214.9	2686.61	5958.12	4322.36	2585.87	3833.72	3209.8	1696.06	3800.31	1.16393	0.000912441	0.00248745	NA
LOC_Os10g40640	124.838	1736.19	930.514	28.1301	30.9913	29.5607	135.847	494.128	314.987	251.532	487.953	369.743	533.019	2330.33	1431.67	147.601	1857.88	1002.74	203.494	1156.25	2.50639	0.000258156	0.000216044	NA
LOC_Os10g40720	7798.69	7058.86	7428.77	5136.88	13195.5	9166.19	7992.48	31228.9	19610.7	5554.67	24126.4	14840.5	7415.32	6080.64	6747.98	1982.89	3830.18	2906.53	5980.15	14253.4	1.25305	0.0237238	0.0284203	NA
LOC_Os10g41330	154.211	540.878	347.545	31.2557	126.87	79.0631	38.3372	80.2957	59.3165	0.952773	2.21127	1.58202	138.878	191.185	165.032	85.8144	806.851	446.333	74.9083	291.382	1.95971	0.0266411	4.21784e-05	NA
LOC_Os10g41550	1130.88	1281.96	1206.42	636.054	309.913	472.983	461.714	239.343	350.528	591.672	67.8123	329.742	3215.72	578.883	1897.3	1918.81	305.518	1112.16	1325.81	463.905	-1.51497	0.00178679	0.00793832	NA
LOC_Os10g42410	650.625	6564.8	3607.71	537.598	683.745	610.671	490.883	778.251	634.567	1653.06	1513.98	1583.52	3324.28	4958.39	4141.33	1051.51	7995.37	4523.44	1284.66	3749.09	1.54515	0.0110818	0.000944961	NA
LOC_Os10g42970	2.93736	27.4475	15.1924	479.775	505.545	492.66	12.5013	37.0596	24.7804	15.2444	44.2254	29.7349	10.7582	27.2276	18.9929	6.86515	42.4658	24.6655	88.0136	113.995	0.373174	0.0451169	5.5993e-06	NA
LOC_Os11g07225	4.40604	0	2.20302	1.56279	17.4326	9.49768	0.833418	0	0.416709	16.1971	0.73709	8.46712	143.768	0	71.8842	1.14419	0	0.572096	27.9853	3.02828	-3.2081	0.0144334	0.004634	NA
LOC_Os11g02290	20.5615	273.399	146.98	6.25114	10.6532	8.45219	5.83393	41.692	23.763	88.6079	231.446	160.027	180.933	321.996	251.465	29.749	587.444	308.596	55.3227	244.438	2.14353	0.00440543	0.00244293	NA
LOC_Os11g02540	27.9049	0.538187	14.2215	15.6279	0	7.81393	6.66735	0	3.33367	48.5914	0.73709	24.6643	480.206	0.591905	240.399	3.43258	1.17961	2.30609	97.0716	0.507798	-7.57865	5.44285e-06	0.0406921	NA
LOC_Os11g03290	138.056	1.07637	69.5661	309.432	24.2119	166.822	17.5018	0	8.75089	165.783	0.73709	83.2598	13.6922	0	6.84611	14.8745	0	7.43725	109.89	4.33756	-4.66303	1.67442e-07	0.000444746	NA
LOC_Os11g04070	91.0581	515.045	303.052	778.267	1083.73	930.996	267.527	892.518	580.023	54.3081	490.165	272.236	1247.95	1370.26	1309.1	447.379	225.305	336.342	481.081	762.836	0.665093	0.044269	0.0187454	NA
LOC_Os11g04150	165.961	2.15275	84.0568	37.5069	40.676	39.0914	24.1691	1.54415	12.8566	224.854	2.21127	113.533	0	0	0	3.43258	1.17961	2.30609	75.9873	7.96063	-3.2548	0.00677283	0.000464378	NA
LOC_Os11g04409	2643.62	28821.5	15732.6	559.477	4529.57	2544.52	872.589	22712.9	11792.7	5768.09	50349.9	28059	8268.15	37129.6	22698.9	3861.65	48881.7	26371.7	3662.26	32070.9	3.13046	3.0117e-12	0.000152878	NA
LOC_Os11g04470	0	45.2077	22.6039	0	1.93695	0.968477	0	0	0	2.85832	5.15963	4.00897	10.7582	20.7167	15.7374	2.28838	94.3685	48.3284	2.65081	27.8982	3.39567	0.0338654	0.0304605	NA
LOC_Os11g04770	0	0	0	0	0	0	0	0	0	0	0	0	33.2525	0	16.6263	0	0	0	5.54209	0	#NUM!	0.0353374	0.00999418	NA
LOC_Os11g05614	14.6868	116.248	65.4676	7.81393	30.9913	19.4026	3.33367	37.0596	20.1966	27.6304	42.0141	34.8223	569.205	306.607	437.906	4.57677	260.693	132.635	104.541	132.269	0.339403	0.0136903	9.41058e-05	NA
LOC_Os11g06900	1421.68	144.234	782.958	1606.54	830.953	1218.75	917.594	55.5894	486.591	860.354	107.615	483.985	612.238	59.1905	335.714	455.389	67.2375	261.313	978.967	210.803	-2.21536	5.53875e-07	0.00472894	NA
LOC_Os11g06980	3012.26	245.413	1628.84	3.12557	0.968477	2.04702	125.013	71.0308	98.0218	4743.86	1411.53	3077.69	89.9775	23.0843	56.5309	387.881	424.658	406.27	1393.69	362.78	-1.94174	0.00550341	0	NA
LOC_Os11g07830	511.1	57.586	284.343	725.133	508.45	616.791	330.867	41.692	186.28	282.021	50.1221	166.071	232.768	36.1062	134.437	305.499	37.7474	171.623	397.898	121.951	-1.7061	0.000234219	0.0245041	NA
LOC_Os11g07922	1054.51	85.5717	570.042	1970.67	815.457	1393.07	695.904	30.883	363.394	1351.03	185.01	768.021	614.194	268.133	441.163	409.621	110.883	260.252	1015.99	249.323	-2.0268	1.35997e-05	0.0138842	NA
LOC_Os11g07960	1252.78	2167.82	1710.3	168.781	476.491	322.636	1296.8	4857.89	3077.35	1244.32	4625.24	2934.78	1198.07	2399.58	1798.83	1746.04	2334.44	2040.24	1151.13	2810.24	1.28764	0.00704479	0.00782244	NA
LOC_Os11g08100	563.973	1566.12	1065.05	59.3859	221.781	140.584	335.868	1808.2	1072.03	624.066	591.146	607.606	1635.24	2367.62	2001.43	578.961	2696.58	1637.77	632.916	1541.91	1.28463	0.00545664	0.00101303	NA
LOC_Os11g10310	295.205	4.3055	149.755	32.8185	15.4956	24.1571	0	0	0	233.429	0.73709	117.083	5.86809	2.36762	4.11786	6.86515	8.25724	7.5612	95.6976	5.19385	-4.20361	0.0307729	0.0050437	NA
LOC_Os11g10320	255.55	0	127.775	6.25114	2.90543	4.57829	0	0	0	281.068	0	140.534	26.4064	0	13.2032	40.0467	1.17961	20.6132	101.554	0.680839	-7.22071	4.25808e-06	0.0222796	NA
LOC_Os11g10510	17.6242	5889.92	2953.77	50.0091	522.977	286.493	37.5038	2447.48	1242.49	41.922	2503.89	1272.91	182.889	7165.01	3673.95	41.1909	2939.58	1490.38	61.8565	3578.14	5.85414	0	0.02316	NA
LOC_Os11g11940	80.7774	111.405	96.091	831.402	976.225	903.813	15.8349	398.39	207.113	102.9	312.526	207.713	781.435	938.17	859.802	8.00935	169.863	88.9363	303.393	484.43	0.6751	0.0080391	3.86898e-05	NA
LOC_Os11g11960	334.859	1074.76	704.809	220.353	281.827	251.09	54.1722	764.354	409.263	835.582	2001.2	1418.39	253.306	465.829	359.568	161.331	2322.64	1241.99	309.934	1151.77	1.89382	0.000681121	0.0429997	NA
LOC_Os11g12050	165.961	812.662	489.312	275.05	496.829	385.939	25.0025	132.797	78.8997	2.85832	2.21127	2.53479	214.185	242.681	228.433	232.271	1174.89	703.579	152.555	477.011	1.6447	0.0344534	1.34114e-06	NA
LOC_Os11g12320	195.334	403.102	299.218	39.0696	133.65	86.3597	5.83393	138.973	72.4037	57.1664	304.418	180.792	206.361	154.487	180.424	60.6422	1308.18	684.413	94.068	407.136	2.11373	0.0021261	0.0415123	NA
LOC_Os11g12530	1076.54	635.599	856.07	140.651	454.216	297.433	169.184	1289.36	729.274	571.664	962.639	767.152	78.2413	278.787	178.514	68.6515	828.084	448.368	350.822	741.448	1.07961	0.00446223	0.0304152	NA
LOC_Os11g13420	1470.15	551.642	1010.89	1403.38	964.603	1183.99	1480.15	835.385	1157.77	231.524	100.244	165.884	958.455	442.153	700.304	1578.99	616.934	1097.96	1187.11	585.16	-1.02055	0.0317909	0.0362298	NA
LOC_Os11g13870	637.407	51.666	344.536	160.967	106.532	133.75	154.182	9.26489	81.7236	150.538	8.10799	79.3231	66.5051	1.77572	34.1404	14.8745	15.3349	15.1047	197.412	32.1136	-2.61995	0.00114419	0.0229835	NA
LOC_Os11g15040	414.168	346.054	380.111	70.3254	436.783	253.554	50.8385	250.152	150.495	45.7331	780.578	413.156	10.7582	167.509	89.1337	10.2977	620.473	315.385	100.353	433.592	2.11125	2.97925e-05	0.0323581	NA
LOC_Os11g15230	205.615	850.874	528.244	3.12557	0	1.56279	395.04	4544.43	2469.74	228.666	1599.48	914.075	317.855	1860.95	1089.4	260.876	1112.37	686.622	235.196	1661.35	2.82042	5.24872e-05	3.98486e-10	NA
LOC_Os11g15340	57.2785	69.4261	63.3523	17.1906	167.546	92.3686	2.50025	98.8255	50.6629	124.813	455.521	290.167	3.91206	27.8195	15.8658	10.2977	81.3928	45.8453	35.9987	150.089	2.0598	0.00267437	0.020976	NA
LOC_Os11g15370	1.46868	0	0.73434	289.115	53.2662	171.191	23.3357	0	11.6679	0.952773	0	0.476387	0	0	0	0	0	0	52.4787	8.8777	-2.56347	0.0131754	1.99064e-09	NA
LOC_Os11g17540	1054.51	298.694	676.603	339.124	166.578	252.851	395.04	112.723	253.882	3217.52	423.827	1820.67	57.7029	15.9814	36.8422	61.7864	191.096	126.441	854.28	201.483	-2.08405	0.0185111	9.35456e-06	NA
LOC_Os11g17720	163.023	49.5132	106.268	0	0	0	28.3362	356.698	192.517	125.766	354.54	240.153	6.84611	65.1096	35.9778	5.72096	99.0869	52.4039	54.9488	154.158	1.48825	0.0224201	2.85539e-05	NA
LOC_Os11g17970	1299.78	120.554	710.167	436.017	156.893	296.455	339.201	63.3101	201.256	723.155	42.0141	382.584	41.0767	7.10286	24.0898	30.8932	21.2329	26.0631	478.354	68.5179	-2.80353	0.000408674	0.000656742	NA
LOC_Os11g18044	2841.89	476.834	1659.36	561.04	282.795	421.918	505.885	186.842	346.363	2175.18	372.23	1273.71	265.042	43.2091	154.126	109.842	225.305	167.574	1076.48	264.536	-2.02479	0.00511777	0.00189931	NA
LOC_Os11g19210	295.205	83.9572	189.581	1654.99	533.631	1094.31	352.536	63.3101	207.923	363.959	33.9061	198.933	140.834	22.4924	81.6633	74.3725	53.0823	63.7274	480.316	131.73	-1.8664	0.00127558	0.000231968	NA
LOC_Os11g19340	0	178.678	89.339	0	0	0	0	0	0	65.7414	51.5963	58.6688	14.6702	97.0724	55.8713	10.2977	106.165	58.2311	15.1182	72.2519	2.25675	0.0283944	5.26469e-05	NA
LOC_Os11g24060	2.93736	277.704	140.321	6.25114	5.81086	6.031	20.002	49.4128	34.7074	0	36.8545	18.4272	105.626	311.934	208.78	78.9493	166.324	122.637	35.6276	141.34	1.98811	0.0146885	0.0079041	NA
LOC_Os11g24450	2255.89	294.926	1275.41	1811.27	843.543	1327.41	1196.79	160.591	678.69	2176.13	227.761	1201.95	341.328	57.4148	199.371	773.474	162.786	468.13	1425.81	291.17	-2.29185	2.74892e-06	0.00904231	NA
LOC_Os11g25260	3831.78	654.974	2243.38	8543.75	4505.35	6524.55	13.3347	0	6.66735	4665.73	1533.88	3099.81	1971.68	233.803	1102.74	1049.22	703.045	876.135	3345.92	1271.84	-1.39548	9.79319e-05	0	NA
LOC_Os11g26340	1276.28	3.76731	640.025	711.067	72.6358	391.852	0.833418	0	0.416709	840.346	0.73709	420.542	14.6702	0.591905	7.63107	27.4606	2.35921	14.9099	478.443	13.3485	-5.16359	2.6529e-09	1.14351e-10	NA
LOC_Os11g26920	685.873	20.9893	353.431	157.841	18.4011	88.1212	120.012	0	60.0061	702.194	10.3193	356.257	3.91206	0.591905	2.25198	5.72096	9.43685	7.57891	279.259	9.95639	-4.80984	2.71146e-05	0.000949787	NA
LOC_Os11g27730	2123.71	230.882	1177.3	6.25114	0	3.12557	294.197	64.8543	179.525	1404.39	89.9249	747.156	32.2745	10.0624	21.1685	46.9119	71.956	59.4339	651.289	77.9466	-3.06274	0.000659408	1.90205e-10	NA
LOC_Os11g28184	242.332	82.3426	162.337	4.68836	18.4011	11.5447	43.3378	247.064	145.201	41.922	227.761	134.841	16.6263	55.0472	35.8367	9.15354	253.615	131.384	59.6767	147.372	1.30422	0.0225374	0.0414238	NA
LOC_Os11g28530	23.4989	73.7316	48.6152	0	21.3065	10.6532	0	1.54415	0.772074	20.0082	110.563	65.2858	0	3.55143	1.77572	2.28838	43.6454	22.9669	7.63258	42.3904	2.4735	0.00402806	0.00430291	NA
LOC_Os11g29290	52.8725	904.692	478.782	1.56279	13.5587	7.56073	9.1676	38.6037	23.8857	89.5607	56.0188	72.7898	157.461	188.226	172.843	53.777	1073.44	563.609	60.7335	379.09	2.64198	0.00670776	6.8975e-05	NA
LOC_Os11g30290	0	25.2948	12.6474	0	0	0	0	1.54415	0.772074	0	0.73709	0.368545	4.89008	17.7572	11.3236	0	2.35921	1.17961	0.815013	7.94873	3.28583	0.0228877	0.0337134	NA
LOC_Os11g30760	49.9351	428.397	239.166	17.1906	204.349	110.77	27.5028	305.741	166.622	55.2608	95.0846	75.1727	1608.84	954.743	1281.79	110.987	290.183	200.585	311.619	379.75	0.285267	0.00382985	4.36218e-06	NA
LOC_Os11g31430	374.513	233.573	304.043	1.56279	5.81086	3.68682	10.001	126.62	68.3106	131.483	327.268	229.375	64.549	242.681	153.615	12.5861	87.2909	49.9385	99.1158	170.541	0.782929	0.0279403	0.000329372	NA
LOC_Os11g31470	616.845	1317.48	967.164	0	3.87391	1.93695	2.50025	15.4415	8.97087	178.169	1120.38	649.272	539.865	1078.45	809.158	20.5955	240.64	130.618	226.329	629.377	1.4755	0.000627635	4.88498e-15	NA
LOC_Os11g31680	93.9955	81.2662	87.6309	0	8.71629	4.35815	0.833418	67.9426	34.388	43.8276	151.103	97.4655	59.659	181.123	120.391	19.4513	100.267	59.8589	36.2944	98.403	1.43895	0.0155059	0.0363653	NA
LOC_Os11g31690	4.40604	64.5824	34.4942	0	0.968477	0.484238	5.00051	55.5894	30.2949	6.66941	102.455	54.5624	145.724	247.416	196.57	16.0187	53.0823	34.5505	29.6365	87.3491	1.55942	0.00738999	0.000568282	NA
LOC_Os11g31740	0	33.9058	16.9529	0	0	0	0	1.54415	0.772074	31.4415	44.2254	37.8335	22.4944	124.892	73.6932	3.43258	17.6941	10.5633	9.56141	37.0436	1.95393	0.0394895	0.00110557	NA
LOC_Os11g32100	1296.84	462.303	879.573	5710.42	3696.68	4703.55	3629.54	591.409	2110.47	1253.85	698.024	975.937	2497.85	474.708	1486.28	4219.78	543.798	2381.79	3101.38	1077.82	-1.52479	0.00014285	0.00374404	NA
LOC_Os11g33120	815.117	3810.36	2312.74	246.92	436.783	341.852	155.849	866.268	511.058	1464.41	1556	1510.2	798.061	3641.99	2220.03	248.29	3238.02	1743.15	621.442	2258.24	1.86151	0.00016756	0.00635608	NA
LOC_Os11g33270	179.179	1261.51	720.345	135.962	160.767	148.365	265.86	3128.45	1697.15	85.7496	607.362	346.556	615.172	1670.95	1143.06	228.838	1259.82	744.329	251.794	1348.14	2.42066	4.52504e-05	0.0219516	NA
LOC_Os11g34110	304.017	37.1349	170.576	60.9486	9.68477	35.3167	44.1712	9.26489	26.718	84.7968	8.84508	46.8209	6.84611	2.36762	4.60687	10.2977	0	5.14887	85.1795	11.2162	-2.92492	0.00410356	0.0171663	NA
LOC_Os11g34940	4316.45	1791.62	3054.04	1258.04	523.946	890.994	3296.17	2106.22	2701.19	2863.08	1143.23	2003.15	2018.62	668.853	1343.74	371.862	509.59	440.726	2354.04	1123.91	-1.06661	0.0425578	0.0144642	NA
LOC_Os11g35490	0	0	0	6.25114	36.8021	21.5266	0	0	0	0	0.73709	0.368545	9.78016	18.941	14.3606	6.86515	406.964	206.915	3.81608	77.2407	4.3392	0.0377044	1.56787e-06	NA
LOC_Os11g35500	622.72	226.039	424.379	73.4509	351.557	212.504	65.84	472.51	269.175	234.382	639.057	436.72	9.78016	169.285	89.5325	13.7303	303.159	158.445	169.984	360.268	1.08367	0.00132665	0.0201671	NA
LOC_Os11g35730	0	0	0	3.12557	94.9107	49.0181	0.833418	0	0.416709	1.90555	1.47418	1.68986	1.95603	67.4772	34.7166	5.72096	115.601	60.6612	2.25692	46.5772	4.3672	0.04494	0.0100475	NA
LOC_Os11g36090	1.46868	6.99643	4.23256	1.56279	10.6532	6.10802	22.5023	177.577	100.04	28.5832	271.986	150.285	10.7582	129.035	69.8967	3.43258	48.3639	25.8982	11.3846	107.435	3.23831	0.00121662	0.0166491	NA
LOC_Os11g36160	138.056	89.8772	113.967	6.25114	74.5727	40.4119	39.1707	660.896	350.033	78.1274	442.991	260.559	14.6702	229.067	121.869	1.14419	40.1066	20.6254	46.2366	256.252	2.47046	0.000240511	0.00700743	NA
LOC_Os11g36190	992.827	678.654	835.74	9.37671	43.5815	26.4791	410.875	3156.24	1783.56	533.553	2063.11	1298.33	205.383	1527.71	866.545	3.43258	36.5678	20.0002	359.241	1250.98	1.80003	0.000168659	1.59484e-12	NA
LOC_Os11g36200	105.745	843.339	474.542	4.68836	8.71629	6.70232	48.3383	220.813	134.576	172.452	458.47	315.461	452.821	1037.02	744.92	9.15354	79.0336	44.0936	132.2	441.232	1.73882	0.0028153	7.43081e-07	NA
LOC_Os11g36940	652.094	55.4333	353.763	484.464	214.033	349.248	317.532	13.8973	165.715	402.07	28.7465	215.408	110.516	1.18381	55.8498	40.0467	9.43685	24.7418	334.454	53.7885	-2.63644	9.67295e-06	0.00174926	NA
LOC_Os11g37630	0	0	0	0	1.93695	0.968477	0	4.63245	2.31622	0	0	0	0.978016	26.6357	13.8069	0	0	0	0.163003	5.53419	5.0854	0.0297159	0.0229291	NA
LOC_Os11g39420	7.3434	16.6838	12.0136	1.56279	0.968477	1.26563	5.00051	71.0308	38.0157	4.76387	476.897	240.83	7.82413	13.6138	10.719	5.72096	15.3349	10.5279	5.36927	99.0881	4.20591	0.0483874	0.0398165	NA
LOC_Os11g39490	0	0	0	0	3.87391	1.93695	0	6.1766	3.0883	3.81109	45.6996	24.7553	0	0	0	0	0	0	0.635182	9.29168	3.8707	0.0316915	0.00239806	NA
LOC_Os11g41034	69.0279	3.22912	36.1285	1.56279	0	0.781393	0	0	0	0	0	0	27.3844	0	13.6922	0	0	0	16.3292	0.538187	-4.9232	0.0108959	0.00100534	NA
LOC_Os11g41650	199.74	30.6767	115.209	118.772	32.9282	75.85	1023.44	78.7516	551.095	1782.64	239.554	1011.1	44.9887	7.10286	26.0458	32.0374	27.1309	29.5842	533.602	69.3574	-2.94364	0.000365676	4.40088e-06	NA
LOC_Os11g41680	0	0.538187	0.269093	29.6929	72.6358	51.1643	4.16709	213.093	108.63	23.8193	95.0846	59.452	0	15.3895	7.69477	0	14.1553	7.07764	9.61322	68.4826	2.83265	0.00190555	0.00109317	NA
LOC_Os11g42230	214.427	2.69093	108.559	43.758	22.275	33.0165	16.6684	1.54415	9.10626	4.76387	0	2.38193	0	0	0	2.28838	1.17961	1.734	46.9843	4.61494	-3.34779	0.0213239	0.000487779	NA
LOC_Os11g42480	71.9653	0.538187	36.2517	6.25114	1.93695	4.09405	0	0	0	0.952773	0	0.476387	0.978016	0	0.489008	0	0	0	13.3579	0.412523	-5.01707	0.0344903	0.00737271	NA
LOC_Os11g42490	1114.73	85.0335	599.881	139.088	62.951	101.019	220.022	9.26489	114.644	440.181	12.5305	226.356	71.3952	37.8819	54.6385	33.1816	3.53882	18.3602	336.433	35.2001	-3.25667	0.000112534	0.00944508	NA
LOC_Os11g42500	16835.5	375.655	8605.56	14543.3	809.647	7676.46	13862.2	205.372	7033.81	30671.7	260.193	15465.9	3927.71	61.5581	1994.63	3498.94	322.032	1910.49	13889.9	339.076	-5.35628	0	0.0036176	NA
LOC_Os11g43250	321.641	30.1385	175.89	932.983	339.935	636.459	229.19	21.6181	125.404	109.569	20.6385	65.1037	89.9775	16.5733	53.2754	82.3818	63.6987	73.0403	294.29	82.1004	-1.84178	0.00218328	0.00298523	NA
LOC_Os11g43520	7.3434	58.6624	33.0029	0	2.90543	1.45272	1.66684	247.064	124.365	26.6777	45.6996	36.1886	268.954	198.288	233.621	137.303	196.994	167.149	73.6575	124.936	0.762279	0.0496339	0.00028979	NA
LOC_Os11g43860	1636.11	89.8772	862.993	565.728	362.21	463.969	568.391	37.0596	302.725	524.978	23.5869	274.282	106.604	5.91905	56.2614	151.033	1.17961	76.1065	592.141	86.6388	-2.77285	2.91117e-08	1.2677e-05	NA
LOC_Os11g44680	85.1834	253.486	169.335	1.56279	59.0771	30.3199	2.50025	18.5298	10.515	36.2054	211.545	123.875	649.402	139.098	394.25	18.3071	714.841	366.574	132.194	232.763	0.816209	0.00253936	1.71358e-05	NA
LOC_Os11g46210	26.4362	58.1242	42.2802	264.111	368.99	316.55	376.705	755.089	565.897	717.438	762.151	739.795	6.84611	138.506	72.676	8.00935	44.825	26.4172	233.258	354.614	0.604325	0.0294963	1.70658e-06	NA
LOC_Os11g46860	0	0.538187	0.269093	184.409	1473.05	828.731	0	0	0	16.1971	873.451	444.824	1.95603	0.591905	1.27397	0	1.17961	0.589803	33.7603	391.469	3.5355	0.00747646	0	NA
LOC_Os11g46880	1.46868	17.222	9.34533	3.12557	16.4641	9.79484	0	0	0	20.961	224.812	122.887	9.78016	27.8195	18.7998	12.5861	56.6211	34.6036	7.98692	57.1565	2.83921	0.0254679	0.00486695	NA
LOC_Os11g47110	4.40604	41.4404	22.9232	0	0	0	0	0	0	0	0	0	0	2.95953	1.47976	0	7.07764	3.53882	0.73434	8.57959	3.54639	0.0378043	0.00372918	NA
LOC_Os11g47140	0	71.5789	35.7894	10.9395	34.8652	22.9023	0	0	0	91.4662	117.197	104.332	17.6043	296.544	157.074	10.2977	44.825	27.5614	21.718	94.1685	2.11636	0.014827	0.000576417	NA
LOC_Os11g47520	2.93736	381.575	192.256	3.12557	13.5587	8.34212	2.50025	319.639	161.07	0.952773	90.662	45.8074	97.8016	839.322	468.562	2.28838	205.251	103.77	18.2677	308.335	4.07713	7.749e-09	7.15881e-05	NA
LOC_Os11g47530	0	85.0335	42.5168	0	0	0	0	15.4415	7.72074	0	15.4789	7.73944	18.5823	139.098	78.84	2.28838	4.71842	3.5034	3.47845	43.295	3.63769	0.00170596	0.00280774	NA
LOC_Os11g47550	0	140.467	70.2334	0	0	0	0.833418	257.873	129.353	0.952773	56.0188	28.4858	0.978016	1386.83	693.906	1.14419	148.63	74.8873	0.6514	331.637	8.99185	8.23008e-13	0.000151286	NA
LOC_Os11g47560	0	99.0264	49.5132	3.12557	57.1401	30.1329	0	61.766	30.883	0	22.1127	11.0563	15.6483	934.618	475.133	3.43258	517.847	260.64	3.70107	282.085	6.25205	3.70686e-11	0.000215022	NA
LOC_Os11g47570	27.9049	1126.43	577.165	6.25114	99.7531	53.0021	6.66735	2195.78	1101.22	5.71664	499.01	252.363	94.8675	6624.6	3359.73	9.15354	1886.19	947.672	25.0935	2071.96	6.36754	0	9.25787e-07	NA
LOC_Os11g47580	26.4362	82.8808	54.6585	3.12557	0	1.56279	0.833418	166.768	83.8007	5.71664	30.9578	18.3372	146.702	591.313	369.008	26.3164	266.591	146.454	34.8551	189.752	2.44467	0.00905838	0.000235819	NA
LOC_Os11g47590	1.46868	95.2591	48.3639	0	24.2119	12.106	0.833418	140.518	70.6755	0.952773	212.282	106.617	9.78016	742.841	376.311	0	114.422	57.2109	2.1725	221.589	6.67238	2.57919e-11	0.0126208	NA
LOC_Os11g47600	1.46868	431.088	216.278	3.12557	116.217	59.6714	1.66684	613.027	307.347	1.90555	178.376	90.1406	62.593	1960.98	1011.79	1.14419	547.337	274.241	11.984	641.171	5.74153	0	1.87819e-05	NA
LOC_Os11g47610	1.46868	10.2256	5.84712	1.56279	6.77934	4.17106	0	236.255	118.127	0	20.6385	10.3193	5.86809	835.77	420.819	3.43258	93.1889	48.3107	2.05536	200.476	6.6079	4.69949e-07	0.00403533	NA
LOC_Os11g47809	3692.26	9354.23	6523.24	500.091	3257.96	1879.02	606.729	2668.29	1637.51	1863.62	2601.19	2232.41	421.525	1138.23	779.879	568.664	7167.29	3867.98	1275.48	4364.53	1.77478	3.85204e-05	0.00100426	NA
LOC_Os12g01140	2258.83	1619.94	1939.39	234.418	1098.25	666.335	348.369	4221.7	2285.04	1388.19	2472.2	1930.19	94.8675	926.332	510.6	165.908	1473.33	819.618	748.43	1968.63	1.39525	5.61385e-05	0.00128305	NA
LOC_Os12g01900	284.924	44.1313	164.528	164.092	71.6673	117.88	126.68	10.809	68.7443	149.585	5.89672	77.7411	15.6483	0.591905	8.12008	17.1629	11.7961	14.4795	126.349	24.1487	-2.38739	0.00309555	0.0313868	NA
LOC_Os12g02040	364.232	6340.38	3352.31	90.6416	178.2	134.421	66.6735	844.649	455.661	166.735	3105.36	1636.05	117.362	606.703	362.032	57.2096	2034.82	1046.02	143.809	2185.02	3.92542	6.80408e-10	0.000854096	NA
LOC_Os12g02240	4.40604	73.1934	38.7997	4.68836	3.87391	4.28113	2.50025	24.7064	13.6033	0	0	0	68.4611	171.652	120.057	8.00935	204.072	106.041	14.6775	79.583	2.43885	0.02251	0.000201827	NA
LOC_Os12g02300	20792.1	14506.8	17649.5	15810.7	7980.25	11895.5	13268.9	3185.58	8227.22	43690.4	12874.7	28282.6	7811.41	3069.62	5440.52	92.6796	103.805	98.2425	16911	6953.47	-1.28216	0.0124096	6.71685e-14	NA
LOC_Os12g02370	10348.3	1796.47	6072.39	1476.83	1907.9	1692.37	1677.67	492.583	1085.13	5970.08	839.545	3404.81	529.107	76.9477	303.027	339.825	465.944	402.885	3390.3	929.898	-1.86627	0.00189184	8.23627e-07	NA
LOC_Os12g02470	10.2808	1.61456	5.94766	1.56279	1.93695	1.74987	3.33367	0	1.66684	20.961	0	10.4805	310.031	0	155.016	0	0	0	57.6949	0.591919	-6.6069	0.00447722	0.00987203	NA
LOC_Os12g03070	3571.83	633.984	2102.91	1120.52	1183.48	1152	1141.78	634.645	888.214	2645.85	756.991	1701.42	358.932	165.142	262.037	410.765	432.915	421.84	1541.61	634.526	-1.28069	0.0460066	0.0151891	NA
LOC_Os12g04200	4.40604	115.71	60.0581	1.56279	2.90543	2.23411	45.838	759.721	402.78	10.4805	145.207	77.8436	8.80214	62.15	35.4761	0	27.1309	13.5655	11.8482	185.471	3.96845	6.17522e-05	0.000321026	NA
LOC_Os12g04204	3828.85	30972.7	17400.8	653.244	1630.91	1142.08	1271.8	5602.17	3436.98	9550.6	43214.8	26382.7	4756.09	24233.8	14494.9	1549.24	24645.5	13097.4	3601.64	21716.6	2.59208	5.19938e-08	1.59322e-06	NA
LOC_Os12g05260	655.031	5288.76	2971.9	1486.21	1864.32	1675.26	1091.78	2382.62	1737.2	595.483	1767.54	1181.51	4404.01	10595.7	7499.85	3422.28	6576.3	4999.29	1942.46	4745.87	1.28879	0.00274465	0.00143976	NA
LOC_Os12g06030	0	58.1242	29.0621	0	3.87391	1.93695	0	29.3388	14.6694	3.81109	241.028	122.42	0	7.69477	3.84738	0	102.626	51.3129	0.635182	73.781	6.85993	2.54523e-07	0.0206861	NA
LOC_Os12g06660	403.887	459.074	431.48	73.4509	296.354	184.902	945.93	3221.09	2083.51	256.296	1969.5	1112.9	508.568	968.357	738.463	353.555	854.035	603.795	423.615	1294.74	1.61183	0.00400837	0.00657518	NA
LOC_Os12g06920	0	27.9857	13.9929	21.879	52.2977	37.0884	0	1.54415	0.772074	0	1.47418	0.73709	0	6.51096	3.25548	0	0	0	3.6465	14.9688	2.03737	0.0137187	0.00129741	NA
LOC_Os12g07580	1013.39	102.256	557.822	421.952	337.998	379.975	277.528	33.9713	155.75	442.087	30.9578	236.522	63.571	14.2057	38.8884	44.6235	36.5678	40.5956	377.192	92.6594	-2.02529	0.00257833	0.00352591	NA
LOC_Os12g09540	80.7774	1376.14	728.461	28.1301	258.583	143.357	25.0025	545.085	285.044	48.5914	3817.39	1932.99	50.8568	808.542	429.7	86.9586	1435.58	761.27	53.3862	1373.55	4.6853	5.19584e-13	0.0496026	NA
LOC_Os12g10580	199.74	42.5168	121.129	78.1393	51.3293	64.7343	1961.87	94.1931	1028.03	4199.82	571.982	2385.9	27.3844	32.5548	29.9696	58.3538	66.0579	62.2059	1087.55	143.106	-2.92593	0.00910039	1.93343e-10	NA
LOC_Os12g10740	2445.35	2396.55	2420.95	157.841	1013.03	585.434	295.03	2367.18	1331.11	2190.43	4638.51	3414.47	800.017	900.288	850.152	177.35	3204.99	1691.17	1011	2420.09	1.25927	0.000480088	0.00258633	NA
LOC_Os12g10880	2.93736	37.1349	20.0361	0	103.627	51.8135	0	0	0	0	0	0	0.978016	126.076	63.5269	1.14419	28.3105	14.7274	0.843261	49.1914	5.86628	0.000384048	0.00739838	NA
LOC_Os12g12720	1.46868	398.258	199.864	0	0	0	0	0	0	0	1.47418	0.73709	0	75.172	37.586	0	1.17961	0.589803	0.24478	79.3474	8.34055	7.38406e-05	7.10755e-06	NA
LOC_Os12g13270	120.432	32.8294	76.6306	143.776	28.0858	85.931	137.514	24.7064	81.1102	3228	1578.85	2403.42	57.7029	17.7572	37.73	14.8745	34.2086	24.5415	617.049	286.072	-1.10901	0.016863	2.22045e-16	NA
LOC_Os12g13340	19921.2	2288.91	11105	1628.42	1205.75	1417.09	6248.97	3903.61	5076.29	1484.42	943.475	1213.95	1936.47	826.3	1381.39	3497.8	1927.48	2712.64	5786.21	1849.25	-1.64567	0.0122231	0.000154857	NA
LOC_Os12g13860	1.46868	7.53462	4.50165	0	0	0	0	0	0	3.81109	13.2676	8.53935	9.78016	265.174	137.477	3.43258	20.0533	11.7429	3.08208	51.0048	4.04866	0.0393095	0.000207038	NA
LOC_Os12g13890	1.46868	144.772	73.1205	0	0.968477	0.484238	2.50025	9.26489	5.88257	2.85832	11.0563	6.95733	403.921	2706.78	1555.35	151.033	260.693	205.863	93.6302	522.256	2.47971	0.00101635	0	NA
LOC_Os12g14699	23.4989	141.543	82.521	0	0	0	8.33418	511.113	259.724	27.6304	215.23	121.43	90.9555	747.576	419.266	8.00935	378.654	193.331	26.4047	332.353	3.65385	7.41898e-06	1.47246e-05	NA
LOC_Os12g16200	4530.88	700.719	2615.8	368.817	541.379	455.098	1457.65	514.202	985.925	3207.03	1193.35	2200.19	779.479	44.3929	411.936	383.304	304.338	343.821	1787.86	549.73	-1.70144	0.00374043	0.00120545	NA
LOC_Os12g16220	737.277	107.099	422.188	62.5114	113.312	87.9116	16.6684	0	8.33418	399.212	78.8686	239.04	27.3844	10.0624	18.7234	57.2096	40.1066	48.6581	216.71	58.2414	-1.89565	0.0403208	0.000497902	NA
LOC_Os12g16240	180.648	23.6802	102.164	440.706	528.788	484.747	143.348	18.5298	80.9389	175.31	3.68545	89.4979	7.82413	1.77572	4.79992	8.00935	9.43685	8.7231	159.307	97.6494	-0.706131	0.0161365	2.11174e-06	NA
LOC_Os12g17430	152.743	696.952	424.847	3.12557	2.90543	3.0155	4.16709	109.635	56.9008	169.594	282.305	225.949	283.625	1046.49	665.056	62.9306	1159.55	611.242	112.697	549.64	2.28603	0.000765202	4.44273e-07	NA
LOC_Os12g17950	30.8423	36.5967	33.7195	0	0	0	3.33367	10.809	7.07136	21.9138	30.2207	26.0672	2.93405	783.682	393.308	1.14419	28.3105	14.7274	10.028	148.27	3.88612	0.0306428	4.23929e-05	NA
LOC_Os12g18560	0	69.9643	34.9822	0	1.93695	0.968477	0	1.54415	0.772074	4.76387	7.3709	6.06738	17.6043	121.341	69.4724	1.14419	56.6211	28.8826	3.91872	43.1297	3.46022	0.00452509	0.0128498	NA
LOC_Os12g19381	179254	18162.2	98708	35208	23778	29493	56277.4	6496.23	31386.8	167276	13769.6	90522.6	10708.3	1258.98	5983.64	12485.4	11789	12137.2	76868.1	12542.3	-2.61558	1.49102e-05	0.00024717	NA
LOC_Os12g21784	1051.57	40.364	545.969	1.56279	4.84238	3.20258	401.708	75.6633	238.685	847.968	456.259	652.113	22.4944	8.28667	15.3905	17.1629	9.43685	13.2999	390.412	99.142	-1.97743	0.0324154	8.59174e-10	NA
LOC_Os12g23180	10636.2	2646.27	6641.22	2395.75	2665.25	2530.5	3842.06	1607.46	2724.76	9710.66	2699.96	6205.31	1448.44	797.888	1123.16	1720.87	2335.62	2028.24	4958.99	2125.41	-1.22231	0.0461167	0.02424	NA
LOC_Os12g24020	130.712	11.8401	71.2763	6.25114	0.968477	3.60981	68.3403	10.809	39.5747	279.163	2.94836	141.055	319.811	37.29	178.551	283.76	11.7961	147.778	181.34	12.6087	-3.8462	3.94207e-05	0.0469428	NA
LOC_Os12g24800	180.648	5.38187	93.0147	29.6929	38.7391	34.216	30.0031	0	15.0015	3.81109	0	1.90555	20.5383	0	10.2692	13.7303	8.25724	10.9938	46.4039	8.7297	-2.41024	0.00522944	0.0227751	NA
LOC_Os12g25490	527.256	39.8258	283.541	20.3162	31.9597	26.138	70.0071	4.63245	37.3198	57.1664	2.21127	29.6888	15.6483	7.10286	11.3756	38.9025	9.43685	24.1697	121.549	15.8615	-2.93794	0.011733	0.048968	NA
LOC_Os12g27220	10.2808	0	5.14038	0	0	0	0.833418	0	0.416709	144.822	0	72.4108	155.505	0	77.7523	0	1.17961	0.589803	51.9067	0.196601	-8.04451	0.000487198	0.0194366	NA
LOC_Os12g27254	2.93736	0	1.46868	0	0	0	3.33367	0	1.66684	201.988	0	100.994	0	0	0	0	0	0	34.7098	0	#NUM!	0.000751742	0.000413326	NA
LOC_Os12g31620	4.40604	21.5275	12.9668	0	0	0	38.3372	415.376	226.857	5.71664	11.0563	8.38649	1.95603	9.47048	5.71326	0	12.9757	6.48783	8.40266	78.401	3.22195	0.0179298	2.38074e-05	NA
LOC_Os12g32940	1453.99	177.602	815.797	295.366	156.893	226.13	192.52	61.766	127.143	364.912	35.3803	200.146	81.1753	24.86	53.0177	54.9212	81.3928	68.157	407.148	89.649	-2.18319	0.0143553	0.0196302	NA
LOC_Os12g33130	0	0	0	151.59	10.6532	81.1217	0.833418	0	0.416709	0	0	0	7.82413	0	3.91206	4.57677	0	2.28838	27.4708	1.77554	-3.95157	0.00894273	2.60907e-05	NA
LOC_Os12g33300	20.5615	1386.37	703.466	0	0	0	1.66684	1.54415	1.60549	0.952773	5.15963	3.0562	189.735	804.991	497.363	46.9119	299.62	173.266	43.3047	416.281	3.26496	0.00176691	7.77156e-15	NA
LOC_Os12g34802	295.205	64.0443	179.624	1.56279	0	0.781393	185.019	30.883	107.951	269.635	111.301	190.468	5.86809	1.18381	3.52595	27.4606	21.2329	24.3468	130.792	38.1074	-1.77913	0.0399589	2.01748e-05	NA
LOC_Os12g35330	0	0.538187	0.269093	0	0.968477	0.484238	0	182.21	91.1048	0.952773	2.94836	1.95057	2.93405	204.207	103.571	0	9.43685	4.71842	0.647803	66.7181	6.68638	0.000287785	0.0022477	NA
LOC_Os12g35340	7.3434	143.158	75.2506	7.81393	7.74781	7.78087	3.33367	239.343	121.338	16.1971	40.5399	28.3685	244.504	232.619	238.561	101.833	339.727	220.78	63.5042	167.189	1.39656	0.0255407	0.00485475	NA
LOC_Os12g35590	840.085	2357.8	1598.94	3.12557	4.84238	3.98398	1534.32	3094.47	2314.4	625.972	1836.09	1231.03	275.8	496.608	386.204	1140.76	2368.65	1754.7	736.678	1693.08	1.20054	0.0235396	2.71672e-12	NA
LOC_Os12g36110	232.051	1991.29	1111.67	68.7626	277.953	173.358	166.684	379.861	273.272	720.297	775.418	747.857	3136.5	1491.01	2313.75	482.849	1537.03	1009.94	801.19	1075.43	0.424693	0.0286447	5.20685e-05	NA
LOC_Os12g36910	666.78	5164.44	2915.61	278.176	254.709	266.443	348.369	815.311	581.84	1010.89	2935.83	1973.36	894.884	2323.82	1609.35	479.417	5691.6	3085.51	613.086	2864.28	2.22401	0.000460553	0.0106387	NA
LOC_Os12g38150	274.643	836.881	555.762	318.808	213.065	265.937	173.351	1130.32	651.834	221.996	684.756	453.376	1185.36	2742.3	1963.83	1442.83	1466.25	1454.54	602.83	1178.93	0.967652	0.0365723	0.00568162	NA
LOC_Os12g38270	330.453	1584.96	957.707	321.934	1989.25	1155.59	64.1732	331.992	198.083	2300.95	863.869	1582.41	97.8016	53.2715	75.5365	151.033	818.647	484.84	544.39	940.332	0.788529	0.0217598	1.01231e-05	NA
LOC_Os12g39440	608.033	330.447	469.24	6.25114	0.968477	3.60981	554.223	358.243	456.233	596.436	253.559	424.997	258.196	167.509	212.853	901.623	218.227	559.925	487.461	221.492	-1.13803	0.0482722	1.06474e-05	NA
LOC_Os12g40180	19.0928	543.031	281.062	9.37671	42.613	25.9948	23.3357	216.181	119.758	230.571	1645.18	937.878	117.362	207.759	162.56	45.7677	686.531	366.149	74.251	556.883	2.90689	1.40855e-05	0.000609885	NA
LOC_Os12g40630	0	0	0	0	0	0	0	0	0	0.952773	0	0.476387	246.46	0.591905	123.526	0	0	0	41.2355	0.0986509	-8.70734	0.00772335	7.18746e-06	NA
LOC_Os12g40730	0	0	0	0	0	0	0	4.63245	2.31622	0	1.47418	0.73709	0	56.231	28.1155	0	3.53882	1.76941	0	10.9794	#DIV/0!	0.0018052	0.0383323	NA
LOC_Os12g40900	944.361	1386.37	1165.37	1111.14	1209.63	1160.38	1655.17	9431.66	5543.42	1504.43	2224.54	1864.48	1112	2016.62	1564.31	448.523	1698.63	1073.58	1129.27	2994.57	1.40696	0.0221626	0.0327928	NA
LOC_Os12g41710	707.903	360.585	534.244	123.46	544.284	333.872	196.687	2257.55	1227.12	1031.85	1908.33	1470.09	155.505	741.065	448.285	58.3538	635.808	347.081	378.96	1074.6	1.50368	0.000821297	0.0131415	NA
LOC_Os12g41720	1523.02	526.347	1024.68	697.002	420.319	558.661	306.698	64.8543	185.776	566.9	84.0282	325.464	148.658	45.5767	97.1175	78.9493	372.756	225.852	553.538	252.313	-1.13347	0.0458314	0.00967299	NA
LOC_Os12g42190	684.405	118.939	401.672	1439.33	795.119	1117.22	1038.44	44.7803	541.61	694.572	86.9766	390.774	1975.59	61.5581	1018.58	1240.3	96.7277	668.516	1178.77	200.684	-2.55429	3.60594e-08	0.0190471	NA
LOC_Os12g43450	118.963	0.538187	59.7506	664.184	21.3065	342.745	23.3357	0	11.6679	316.321	2.94836	159.635	290.471	0.591905	145.531	41.1909	0	20.5955	242.411	4.23082	-5.84037	1.92018e-11	0.000505827	NA
LOC_Os01g01840	82.246	0	41.123	1.56279	2.90543	2.23411	36.6704	0	18.3352	233.429	0	116.715	233.746	0	116.873	2.28838	1.17961	1.734	98.3238	0.680839	-7.17408	1.77054e-05	NA	0.00586373
LOC_Os01g67410	2.93736	60.2769	31.6072	17.1906	0	8.59532	1.66684	63.3101	32.4885	0	11.0563	5.52817	0	61.5581	30.7791	3.43258	2.35921	2.89589	4.20457	33.0935	2.97652	0.0253559	NA	0.0238189
LOC_Os01g71670	674.124	71.5789	372.851	637.617	51.3293	344.473	535.055	4.63245	269.844	1698.79	11.0563	854.926	703.193	1.77572	352.485	266.597	34.2086	150.403	752.563	29.0969	-4.69288	2.36244e-12	NA	0.0274379
LOC_Os01g72290	2554.03	1055.38	1804.71	2853.65	1034.33	1943.99	2783.62	92.6489	1438.13	2103.72	1247.16	1675.44	4272.95	96.4805	2184.72	1919.95	1237.41	1578.68	2747.99	793.902	-1.79134	3.6491e-05	NA	0.00457567
LOC_Os02g40070	4.40604	325.603	165.005	18.7534	1.93695	10.3452	3.33367	58.6777	31.0057	0	30.2207	15.1103	0.978016	91.7453	46.3617	18.3071	1.17961	9.74334	7.6297	84.8939	3.47596	0.0148476	NA	0.00551453
LOC_Os03g07170	7.3434	435.393	221.368	39.0696	67.7934	53.4315	17.5018	38.6037	28.0528	32.3943	2196.53	1114.46	30.3185	153.895	92.1069	10.2977	1212.64	611.466	22.8209	684.141	4.90587	9.6093e-07	NA	0.00842107
LOC_Os03g51690	39.6543	400.949	220.302	37.5069	1.93695	19.7219	48.3383	416.92	232.629	1.90555	117.934	59.92	15.6483	417.293	216.471	60.6422	109.703	85.1728	33.9492	244.123	2.84616	0.00353069	NA	0.0185663
LOC_Os03g60620	1979.78	806.204	1392.99	2770.82	1294.85	2032.84	2554.43	185.298	1369.86	2396.22	165.845	1281.03	3584.43	74.58	1829.5	3982.93	70.7764	2026.85	2878.1	432.926	-2.73292	2.22779e-10	NA	0.011288
LOC_Os03g62070	83.7147	73.7316	78.7232	0	4.84238	2.42119	61.673	1.54415	31.6086	197.224	11.7934	104.509	135.944	0.591905	68.268	30.8932	16.5145	23.7038	84.9082	18.1697	-2.22437	0.0443013	NA	0.0360971
LOC_Os04g51340	1007.51	2665.64	1836.58	2361.37	1157.33	1759.35	1359.31	2716.16	2037.73	1863.62	2867.28	2365.45	666.029	11635.7	6150.85	521.752	4829.31	2675.53	1296.6	4311.9	1.73359	0.00233722	NA	0.017875
LOC_Os05g02300	1608.2	2154.36	1881.28	4727.43	5116.46	4921.94	6112.29	1771.14	3941.71	717.438	1820.61	1269.02	10480.4	1190.32	5835.37	11646.7	1479.23	6562.98	5882.08	2255.35	-1.38297	0.0453716	NA	0.00929952
LOC_Os05g09740	9044.13	1912.72	5478.42	3656.92	2437.66	3047.29	5633.07	92.6489	2862.86	5008.73	610.31	2809.52	8695.54	62.7419	4379.14	3132.8	1728.12	2430.46	5861.86	1140.7	-2.36144	1.49389e-08	NA	4.7425e-05
LOC_Os05g10370	514.038	1255.05	884.545	1026.75	399.012	712.881	2859.46	13.8973	1436.68	1396.77	6.63381	701.7	1663.6	320.221	991.913	717.409	1573.59	1145.5	1363	594.735	-1.19647	0.00141155	NA	7.23276e-08
LOC_Os05g37130	1160.26	182.445	671.351	809.523	352.526	581.024	656.734	37.0596	346.897	1990.34	83.2911	1036.82	102.692	86.4182	94.5549	60.6422	242.999	151.821	796.698	164.123	-2.27926	0.00545668	NA	0.0109458
LOC_Os05g45460	10.2808	147.463	78.872	46.8836	6.77934	26.8315	5.83393	225.446	115.64	1.90555	90.662	46.2838	1.95603	155.079	78.5176	8.00935	0	4.00467	12.4782	104.238	3.0624	0.0162954	NA	0.00619555
LOC_Os06g04950	22.0302	434.317	228.174	14.0651	0.968477	7.51677	27.5028	223.902	125.702	12.3861	478.371	245.379	13.6922	449.848	231.77	10.2977	201.713	106.005	16.6623	298.186	4.16155	4.57002e-05	NA	0.046343
LOC_Os06g33940	0	22.6039	11.3019	14.0651	0	7.03254	2.50025	52.5011	27.5007	0	9.58217	4.79108	0	79.9072	39.9536	3.43258	0	1.71629	3.33298	27.4324	3.04099	0.0480884	NA	0.00694329
LOC_Os06g44750	5.87472	261.021	133.448	32.8185	6.77934	19.7989	12.5013	115.811	64.1562	0	44.2254	22.1127	3.91206	456.359	230.135	26.3164	8.25724	17.2868	13.5705	148.742	3.45427	0.00667783	NA	0.00540469
LOC_Os06g49340	0	410.637	205.318	4.68836	17.4326	11.0605	1.66684	69.4867	35.5768	0.952773	907.357	454.155	11.7362	363.43	187.583	4.57677	403.425	204.001	3.93682	361.961	6.52266	9.90805e-11	NA	0.043299
LOC_Os07g35560	60.2158	112.481	86.3485	9.37671	1423.66	716.519	12.5013	160.591	86.5464	48.5914	294.099	171.345	19.5603	494.241	256.901	16.0187	1771.77	893.894	27.7107	709.474	4.67823	9.74848e-09	NA	0.0283129
LOC_Os07g41180	124.838	970.889	547.864	378.194	729.263	553.729	579.226	1344.95	962.09	52.4025	774.681	413.542	1108.09	1434.19	1271.14	1739.17	515.488	1127.33	663.654	961.577	0.534971	0.0270868	NA	0.0398621
LOC_Os07g41410	923.799	782.524	853.162	123.46	302.165	212.812	785.08	86.4723	435.776	735.541	173.953	454.747	2014.71	46.7605	1030.74	290.625	438.813	364.719	812.203	305.115	-1.41249	0.0378785	NA	0.00595981
LOC_Os07g48020	317.235	231.959	274.597	73.4509	53.2662	63.3586	14.1681	855.458	434.813	196.271	78.8686	137.57	30.3185	938.17	484.244	33.1816	290.183	161.682	110.771	407.984	1.88093	0.037089	NA	0.00365661
LOC_Os07g48390	741.683	535.496	638.59	217.227	1745.2	981.211	125.846	571.335	348.591	84.7968	1279.59	682.192	276.778	214.27	245.524	26.3164	658.22	342.268	245.441	834.017	1.7647	0.000728753	NA	0.031688
LOC_Os08g03420	61.6845	6526.59	3294.14	153.153	251.804	202.478	120.846	1329.51	725.179	87.6551	6762.8	3425.23	212.229	934.026	573.128	294.057	4270.17	2282.12	154.938	3345.82	4.4326	2.92468e-11	NA	0.00207763
LOC_Os08g28790	762.245	51.1278	406.686	204.725	86.1944	145.46	176.685	3.0883	89.8865	418.267	0.73709	209.502	95.8455	5.32715	50.5863	21.7397	38.927	30.3333	279.918	30.9003	-3.17931	9.73849e-05	NA	0.0157238
LOC_Os09g08990	86.6521	8.0728	47.3624	1.56279	0	0.781393	21.6689	0	10.8344	182.932	0	91.4662	0.978016	2.36762	1.67282	1.14419	4.71842	2.93131	49.1564	2.52647	-4.28218	0.0456337	NA	0.0411854
LOC_Os09g23660	649.156	1970.3	1309.73	292.241	312.818	302.529	180.018	290.3	235.159	871.788	451.836	661.812	377.514	1583.35	980.43	40.0467	2498.41	1269.23	401.794	1184.5	1.55975	0.0224738	NA	0.0095772
LOC_Os09g31040	14.6868	875.63	445.159	35.9441	162.704	99.3241	17.5018	4417.81	2217.66	18.1027	5354.22	2686.16	45.9667	4805.68	2425.82	29.749	1816.59	923.171	26.9918	2905.44	6.75009	0	NA	0.0123041
LOC_Os10g05980	16804.6	13949.3	15376.9	12464.8	5960.97	9212.88	12758.8	2546.3	7652.55	21331.6	7628.14	14479.9	12965.6	1900.61	7433.08	4420.01	14428.9	9424.48	13457.6	7735.71	-0.798813	0.0182052	NA	0.0468266
LOC_Os10g13700	95.4641	425.706	260.585	6.25114	529.757	268.004	76.6745	152.871	114.773	4.76387	793.846	399.305	3.91206	2899.15	1451.53	4.57677	2949.02	1476.8	31.9404	1291.72	5.33777	2.36478e-14	NA	1.50939e-05
LOC_Os10g20650	60.2158	601.155	330.685	329.748	665.344	497.546	620.897	603.762	612.329	15.2444	966.325	490.785	559.425	725.676	642.55	1129.32	682.992	906.155	452.475	707.542	0.644979	0.0312916	NA	0.0080539
LOC_Os10g28350	35.2483	1539.75	787.501	131.274	801.899	466.586	46.6714	2835.06	1440.86	32.3943	3095.78	1564.09	354.042	1862.73	1108.38	320.374	2556.21	1438.29	153.334	2115.24	3.78607	4.23439e-13	NA	0.0397239
LOC_Os10g31440	0	182.984	91.4918	1.56279	0	0.781393	0.833418	20.0739	10.4537	0	157.737	78.8686	0	287.074	143.537	0	18.8737	9.43685	0.399367	111.124	8.12024	1.19652e-06	NA	0.0176388
LOC_Os10g31630	0	69.9643	34.9822	14.0651	0.968477	7.51677	0	24.7064	12.3532	0	3.68545	1.84272	0	10.0624	5.03119	1.14419	0	0.572096	2.53488	18.2312	2.84642	0.0377677	NA	0.0379111
LOC_Os10g36100	411.23	135.623	273.427	29.6929	97.8162	63.7545	205.854	1.54415	103.699	247.721	2.21127	124.966	45.9667	2.95953	24.4631	33.1816	57.8007	45.4911	162.274	49.6592	-1.7083	0.0176616	NA	0.0113036
LOC_Os11g02080	193.866	6971.14	3582.5	303.18	620.794	461.987	273.361	4054.93	2164.15	317.273	13026.6	6671.93	659.183	3103.36	1881.27	459.965	8604.05	4532.01	367.805	6063.48	4.04313	1.22546e-12	NA	0.0370459
LOC_Os11g18730	4032.99	506.434	2269.71	5247.83	900.683	3074.26	4202.1	182.21	2192.15	4503.76	233.657	2368.71	1970.7	34.3305	1002.52	934.805	588.623	761.714	3482.03	407.656	-3.0945	1.05362e-10	NA	0.0345263
LOC_Os11g29840	522.85	118.939	320.895	281.301	251.804	266.553	276.695	3268.96	1772.83	405.881	939.052	672.467	109.538	1276.15	692.843	99.5447	284.285	191.915	282.635	1023.2	1.85607	0.0315006	NA	0.0213248
LOC_Os12g12580	1759.48	369.196	1064.34	151.59	199.506	175.548	1061.77	18.5298	540.152	1478.7	24.324	751.514	503.678	15.9814	259.83	281.471	150.99	216.23	872.783	129.755	-2.74984	4.86245e-06	NA	0.00309705
LOC_Os12g25090	4.40604	174.373	89.3893	6.25114	17.4326	11.8419	0	415.376	207.688	20.0082	79.6057	49.807	57.7029	552.248	304.975	20.5955	38.927	29.7612	18.1606	212.994	3.55192	0.000524927	NA	0.0313058
LOC_Os01g01302	3216.41	797.055	2006.73	2553.59	1628.98	2091.28	2613.6	1848.35	2230.97	3954.96	1508.82	2731.89	974.104	595.457	784.78	1386.76	823.365	1105.06	2449.9	1200.34	-1.02929	0.031795	NA	NA
LOC_Os01g01340	6268.32	1638.24	3953.28	1665.93	1546.66	1606.29	3071.15	840.017	1955.58	6345.47	1401.94	3873.71	2908.62	669.445	1789.03	2989.77	1531.13	2260.45	3874.88	1271.24	-1.60792	0.000845661	NA	NA
LOC_Os01g01920	759.307	441.313	600.31	781.393	487.144	634.268	569.225	208.46	388.842	737.446	168.056	452.751	533.019	249.784	391.401	588.115	180.48	384.297	661.417	289.206	-1.19346	0.0200906	NA	NA
LOC_Os01g02010	1223.41	803.513	1013.46	553.226	629.51	591.368	1007.6	169.856	588.73	746.021	243.24	494.631	880.214	91.1534	485.684	319.23	515.488	417.359	788.284	408.793	-0.947344	0.0429497	NA	NA
LOC_Os01g02020	633.001	1247.52	940.259	515.719	664.375	590.047	380.039	813.766	596.903	690.761	1247.16	968.958	898.796	2026.68	1462.74	772.33	2553.85	1663.09	648.441	1425.56	1.13648	0.0360846	NA	NA
LOC_Os01g02290	22.0302	151.769	86.8995	43.758	83.289	63.5235	40.8375	301.109	170.973	69.5524	218.916	144.234	118.34	883.122	500.731	72.0841	257.154	164.619	61.1004	315.893	2.37018	0.00249289	NA	NA
LOC_Os01g02300	30.8423	327.218	179.03	150.027	227.592	188.81	97.5099	307.286	202.398	101.947	505.644	303.795	201.471	1153.62	677.547	184.215	481.279	332.747	127.669	500.44	1.97079	0.0020183	NA	NA
LOC_Os01g02900	1542.11	1375.61	1458.86	378.194	1252.24	815.217	595.894	3373.97	1984.93	751.738	3027.96	1889.85	420.547	1242.41	831.478	152.178	1565.34	858.757	640.111	1972.92	1.62394	0.000287016	NA	NA
LOC_Os01g02910	321.641	296.003	308.822	254.734	456.153	355.443	289.196	1011.42	650.307	157.208	998.019	577.614	176.043	258.663	217.353	83.526	430.556	257.041	213.725	575.135	1.42815	0.0255321	NA	NA
LOC_Os01g02920	599.221	758.844	679.032	120.334	495.86	308.097	129.18	1565.77	847.473	449.709	1589.17	1019.44	197.559	657.015	427.287	51.4887	760.846	406.167	257.915	971.249	1.91294	0.000115564	NA	NA
LOC_Os01g02930	74.9026	168.991	121.947	31.2557	122.997	77.1261	39.1707	1077.82	558.493	16.1971	426.775	221.486	49.8788	510.814	280.346	21.7397	253.615	137.677	38.8574	426.835	3.45741	1.01534e-05	NA	NA
LOC_Os01g03030	309.891	178.678	244.285	507.905	245.025	376.465	493.384	89.5606	291.472	235.335	59.7043	147.52	486.074	33.1467	259.61	573.24	54.2619	313.751	434.305	110.063	-1.98038	0.000905891	NA	NA
LOC_Os01g03130	60.2158	177.602	118.909	9.37671	25.1804	17.2786	25.836	88.0165	56.9262	110.522	211.545	161.033	172.131	199.472	185.801	9.15354	434.095	221.624	64.5391	189.318	1.55257	0.0351813	NA	NA
LOC_Os01g03290	5.87472	0	2.93736	0	0	0	2.50025	0	1.25013	8.57496	0	4.28748	3.91206	0	1.95603	0	0	0	3.477	0	#NUM!	0.00299989	NA	NA
LOC_Os01g03300	1.46868	0	0.73434	0	0	0	0	0	0	2.85832	0	1.42916	1.95603	0	0.978016	0	0	0	1.04717	0	#NUM!	0.0296626	NA	NA
LOC_Os01g03620	60.2158	127.55	93.8831	4.68836	16.4641	10.5762	2.50025	94.1931	48.3467	2.85832	199.014	100.936	46.9448	104.767	75.856	2.28838	58.9803	30.6343	19.916	100.162	2.33033	0.00230264	NA	NA
LOC_Os01g03630	0	131.856	65.9279	0	4.84238	2.42119	0.833418	1.54415	1.18878	0	1.47418	0.73709	0.978016	56.8229	28.9005	2.28838	37.7474	20.0179	0.683303	39.0478	5.83657	0.00101046	NA	NA
LOC_Os01g03640	0	100.641	50.3205	7.81393	46.4869	27.1504	0.833418	1.54415	1.18878	1.90555	28.7465	15.326	2.93405	23.6762	13.3051	3.43258	94.3685	48.9005	2.81992	49.2439	4.12622	0.00226103	NA	NA
LOC_Os01g03720	7.3434	225.5	116.422	6.25114	49.3923	27.8217	9.1676	237.799	123.483	4.76387	25.0611	14.9125	18.5823	571.188	294.885	8.00935	106.165	57.0869	9.01961	202.518	4.48884	9.34842e-06	NA	NA
LOC_Os01g03890	16.1555	140.467	78.3111	0	98.7846	49.3923	5.83393	504.937	255.385	0.952773	201.963	101.458	7.82413	170.469	89.1464	3.43258	82.5724	43.0025	5.69981	199.865	5.13197	3.22934e-08	NA	NA
LOC_Os01g04200	1174.94	532.805	853.874	1148.65	754.443	951.545	1215.12	619.204	917.164	2213.29	762.888	1488.09	677.765	325.548	501.656	773.474	497.794	635.634	1200.54	582.114	-1.04431	0.0474565	NA	NA
LOC_Os01g04390	142.462	7.53462	74.9983	140.651	61.014	100.832	109.178	12.3532	60.7655	91.4662	7.3709	49.4186	14.6702	12.43	13.5501	30.8932	14.1553	22.5242	88.22	19.143	-2.20429	0.0229472	NA	NA
LOC_Os01g04580	29.3736	284.701	157.037	1.56279	36.8021	19.1825	5.83393	4.63245	5.23319	21.9138	38.3287	30.1212	22.4944	42.6172	32.5558	12.5861	113.242	62.9142	15.6274	86.7206	2.47229	0.0470054	NA	NA
LOC_Os01g04590	472.915	186.751	329.833	578.231	209.191	393.711	306.698	26.2505	166.474	388.731	32.4319	210.582	111.494	95.2967	103.395	243.713	79.0336	161.373	350.297	104.826	-1.74058	0.00599699	NA	NA
LOC_Os01g04630	3126.82	462.841	1794.83	1314.3	892.936	1103.62	1323.47	262.505	792.987	2528.66	165.845	1347.25	755.028	205.391	480.21	721.985	121.499	421.742	1628.38	351.836	-2.21046	1.09315e-05	NA	NA
LOC_Os01g04660	0	20.4511	10.2256	3.12557	2.90543	3.0155	13.3347	37.0596	25.1971	0	22.1127	11.0563	1.95603	92.3372	47.1466	10.2977	17.6941	13.9959	4.78567	32.0933	2.74548	0.0231442	NA	NA
LOC_Os01g04710	3953.68	1138.8	2546.24	4733.68	3097.19	3915.43	3697.04	1883.86	2790.45	1962.71	686.968	1324.84	1513.97	1082	1297.99	1133.89	1022.72	1078.31	2832.5	1485.26	-0.931362	0.0446163	NA	NA
LOC_Os01g04750	143.931	184.06	163.995	31.2557	296.354	163.805	1.66684	118.899	60.2831	8.57496	75.1832	41.8791	27.3844	112.462	69.9232	21.7397	148.63	85.185	39.092	155.931	1.99597	0.0015606	NA	NA
LOC_Os01g04800	1070.67	2490.19	1780.43	364.129	1265.8	814.964	130.013	2855.13	1492.57	158.16	1731.42	944.792	864.566	2903.29	1883.93	694.525	2336.8	1515.66	547.01	2263.77	2.04909	4.41711e-06	NA	NA
LOC_Os01g04900	3386.77	737.316	2062.05	3375.62	2146.14	2760.88	2680.27	1477.75	2079.01	4419.92	1795.55	3107.73	1565.8	648.136	1106.97	1980.6	1045.13	1512.86	2901.5	1308.34	-1.14906	0.00914731	NA	NA
LOC_Os01g04920	591.878	303.537	447.708	1464.33	1000.44	1232.38	1361.81	372.14	866.973	1045.19	303.681	674.437	905.643	181.123	543.383	1149.91	317.314	733.614	1086.46	413.039	-1.39529	0.00301611	NA	NA
LOC_Os01g05060	4077.05	1166.25	2621.65	3447.5	2096.75	2772.13	3154.49	1471.57	2313.03	3423.31	1623.07	2523.19	1996.13	923.964	1460.05	2833.02	1183.14	2008.08	3155.25	1410.79	-1.16125	0.00920564	NA	NA
LOC_Os01g05520	0	0	0	4.68836	0.968477	2.82842	0	0	0	0	0	0	3.91206	0	1.95603	10.2977	0	5.14887	3.14969	0.161413	-4.28638	0.0496605	NA	NA
LOC_Os01g05650	1449.59	2761.44	2105.51	526.659	1028.52	777.591	453.38	1159.66	806.518	924.19	1174.92	1049.56	1453.33	1772.76	1613.04	577.817	2461.84	1519.83	897.494	1726.52	0.943895	0.0404766	NA	NA
LOC_Os01g05820	820.992	75.3462	448.169	250.046	149.145	199.596	152.516	21.6181	87.0668	1083.3	82.554	582.929	143.768	13.6138	78.6911	92.6796	68.4172	80.5484	423.884	68.4491	-2.63057	0.000596029	NA	NA
LOC_Os01g05840	2414.51	1248.06	1831.28	3219.34	2996.47	3107.9	2468.59	787.516	1628.05	4291.29	1504.4	2897.85	1861.16	487.73	1174.45	2488.62	833.982	1661.3	2790.58	1309.69	-1.09134	0.0052739	NA	NA
LOC_Os01g06130	1.46868	40.9022	21.1854	0	13.5587	6.77934	2.50025	15.4415	8.97087	0	24.324	12.162	11.7362	25.4519	18.5941	16.0187	3.53882	9.77875	5.2873	20.5362	1.95756	0.0377631	NA	NA
LOC_Os01g06140	0	11.8401	5.92006	0	0.968477	0.484238	0	0	0	0	1.47418	0.73709	0	0.591905	0.295953	0	0	0	0	2.47911	#DIV/0!	0.0298041	NA	NA
LOC_Os01g06230	2.93736	2.69093	2.81415	0	9.68477	4.84238	0.833418	3.0883	1.96086	0	0.73709	0.368545	0	13.6138	6.80691	0	1.17961	0.589803	0.628463	5.16575	3.03908	0.0480392	NA	NA
LOC_Os01g06370	1.46868	1.07637	1.27253	4.68836	0	2.34418	3.33367	0	1.66684	1.90555	0	0.952773	0.978016	0	0.489008	1.14419	0	0.572096	2.25308	0.179396	-3.65068	0.0325994	NA	NA
LOC_Os01g06630	0	8.0728	4.0364	0	0	0	0	1.54415	0.772074	0	0	0	0	6.51096	3.25548	1.14419	5.89803	3.52111	0.190699	3.67099	4.2668	0.0277969	NA	NA
LOC_Os01g06660	70.4966	218.504	144.5	81.2648	98.7846	90.0247	41.6709	194.563	118.117	140.058	407.611	273.834	160.395	519.693	340.044	154.466	462.406	308.436	108.058	316.927	1.55234	0.0263881	NA	NA
LOC_Os01g06960	0	0	0	0	0	0	0	0	0	3.81109	0.73709	2.27409	8.80214	0	4.40107	4.57677	0	2.28838	2.865	0.122848	-4.54359	0.0496622	NA	NA
LOC_Os01g06980	0	0	0	0	0	0	0	0	0	1.90555	0	0.952773	1.95603	0	0.978016	1.14419	0	0.572096	0.834295	0	#NUM!	0.0471365	NA	NA
LOC_Os01g07010	0	0	0	0	0	0	0	0	0	0.952773	0	0.476387	2.93405	0	1.46702	5.72096	0	2.86048	1.6013	0	#NUM!	0.0294662	NA	NA
LOC_Os01g07020	0	0	0	0	0	0	1.66684	0	0.833418	5.71664	0	2.85832	4.89008	1.18381	3.03694	4.57677	0	2.28838	2.80839	0.197302	-3.83127	0.0430339	NA	NA
LOC_Os01g07030	0	0	0	3.12557	0	1.56279	0	0	0	0	0	0	5.86809	0	2.93405	2.28838	0	1.14419	1.88034	0	#NUM!	0.0217176	NA	NA
LOC_Os01g07040	0	0	0	0	0	0	0.833418	0	0.416709	1.90555	0	0.952773	5.86809	0	2.93405	3.43258	0	1.71629	2.00661	0	#NUM!	0.0144061	NA	NA
LOC_Os01g07050	0	0	0	4.68836	0	2.34418	0	0	0	1.90555	0	0.952773	2.93405	0	1.46702	3.43258	0	1.71629	2.16009	0	#NUM!	0.00938804	NA	NA
LOC_Os01g07480	36.717	75.8844	56.3007	6.25114	29.0543	17.6527	56.6724	94.1931	75.4328	5.71664	32.4319	19.0743	2.93405	100.032	51.483	1.14419	47.1842	24.1642	18.2392	63.13	1.79128	0.0134576	NA	NA
LOC_Os01g07730	568.379	50.0514	309.215	146.902	102.659	124.78	197.52	125.076	161.298	370.629	43.4883	207.059	63.571	12.43	38.0005	65.219	71.956	68.5875	235.37	67.61	-1.79962	0.0356863	NA	NA
LOC_Os01g07770	41.123	47.3605	44.2417	3.12557	24.2119	13.6687	19.1686	60.2218	39.6952	31.4415	85.5024	58.472	7.82413	34.3305	21.0773	6.86515	100.267	53.5658	18.258	58.6489	1.68358	0.0483293	NA	NA
LOC_Os01g07890	80.7774	173.834	127.306	54.6975	100.722	77.7095	41.6709	271.77	156.721	58.1192	350.118	204.118	28.3625	115.422	71.892	41.1909	178.121	109.656	50.8031	198.331	1.96492	0.0139169	NA	NA
LOC_Os01g07910	917.925	995.108	956.516	1340.87	927.801	1134.34	1449.31	162.136	805.725	1341.5	646.428	993.966	1740.87	268.133	1004.5	1833	497.794	1165.39	1437.25	582.9	-1.30199	0.00382796	NA	NA
LOC_Os01g08100	32.3109	16.6838	24.4974	4.68836	18.4011	11.5447	8.33418	49.4128	28.8735	10.4805	70.7606	40.6206	3.91206	39.0657	21.4889	2.28838	24.7717	13.5301	10.3357	36.516	1.82089	0.0486403	NA	NA
LOC_Os01g08130	229.114	68.3497	148.732	543.849	302.165	423.007	114.178	37.0596	75.6189	369.676	29.4836	199.58	166.263	43.2091	104.736	131.582	142.732	137.157	259.11	103.833	-1.3193	0.0288726	NA	NA
LOC_Os01g08140	299.611	135.085	217.348	1484.65	568.496	1026.57	535.888	75.6633	305.776	364.912	45.6996	205.306	629.842	113.054	371.448	438.226	363.319	400.772	625.521	216.886	-1.52812	0.00213515	NA	NA
LOC_Os01g08190	165.961	612.457	389.209	654.807	813.521	734.164	365.871	832.296	599.083	86.7024	673.7	380.201	593.656	1440.7	1017.18	855.856	747.87	801.863	453.809	853.423	0.911178	0.026004	NA	NA
LOC_Os01g08510	4469.19	843.877	2656.53	3510.02	2184.88	2847.45	3610.37	1334.14	2472.26	5801.44	1395.31	3598.37	1402.47	1112.78	1257.63	2101.88	1191.4	1646.64	3482.56	1343.73	-1.3739	0.0053992	NA	NA
LOC_Os01g09030	431.792	7845.69	4138.74	443.831	2578.09	1510.96	368.371	5426.14	2897.26	213.421	10525.6	5369.53	469.448	2581.89	1525.67	521.752	6906.59	3714.17	408.102	5977.34	3.8725	8.28226e-14	NA	NA
LOC_Os01g09120	389.2	1356.23	872.716	318.808	403.855	361.332	273.361	843.105	558.233	664.083	1578.85	1121.46	533.019	760.598	646.808	623.585	1334.13	978.86	467.009	1046.13	1.16354	0.0328807	NA	NA
LOC_Os01g09130	0	2.69093	1.34547	0	0	0	0	1.54415	0.772074	0	0	0	0	2.95953	1.47976	0	3.53882	1.76941	0	1.7889	#DIV/0!	0.0191262	NA	NA
LOC_Os01g09230	4.40604	17.7602	11.0831	1.56279	12.5902	7.07649	3.33367	26.2505	14.7921	10.4805	26.5352	18.5079	2.93405	39.6576	21.2958	3.43258	21.2329	12.3327	4.35827	24.0044	2.46147	0.029573	NA	NA
LOC_Os01g09430	970.797	344.44	657.618	922.043	444.531	683.287	780.08	390.67	585.375	1071.87	561.662	816.766	411.745	115.422	263.583	594.98	403.425	499.203	791.919	376.692	-1.07197	0.0328822	NA	NA
LOC_Os01g09830	105.745	583.395	344.57	114.083	115.249	114.666	98.3434	233.166	165.755	42.8748	812.273	427.574	148.658	433.866	291.262	43.4793	540.26	291.869	92.1974	453.035	2.29682	0.00173732	NA	NA
LOC_Os01g10040	420.042	1031.17	725.604	126.586	250.835	188.711	199.187	1425.25	812.218	323.943	1451.33	887.636	210.273	878.979	544.626	149.889	501.333	325.611	238.32	923.149	1.95366	0.000817873	NA	NA
LOC_Os01g10210	519.912	1241.6	880.755	209.413	459.058	334.236	335.868	253.24	294.554	404.929	911.043	657.986	164.307	368.165	266.236	377.583	1995.89	1186.74	335.335	871.5	1.3779	0.0389915	NA	NA
LOC_Os01g10370	0	21.5275	10.7637	0	0	0	4.16709	4.63245	4.39977	9.52773	56.0188	32.7733	1.95603	26.0438	13.9999	1.14419	16.5145	8.82934	2.79917	20.7895	2.89278	0.0305162	NA	NA
LOC_Os01g10580	281.986	650.13	466.058	126.586	683.745	405.165	157.516	1903.94	1030.73	204.846	1295.07	749.956	310.031	655.831	482.931	250.578	1394.29	822.436	221.924	1097.17	2.30565	5.69534e-05	NA	NA
LOC_Os01g10590	0	4.84368	2.42184	0	0.968477	0.484238	0	10.809	5.40452	1.90555	8.84508	5.37531	0	4.73524	2.36762	0	11.7961	5.89803	0.317591	6.9996	4.46203	0.00313544	NA	NA
LOC_Os01g10990	96.9328	26.9093	61.9211	37.5069	22.275	29.8909	1.66684	0	0.833418	77.1746	2.21127	39.693	39.1206	1.18381	20.1522	19.4513	20.0533	19.7523	45.3088	12.1054	-1.90414	0.0407755	NA	NA
LOC_Os01g11160	108.682	403.102	255.892	26.5674	83.289	54.9282	43.3378	353.61	198.474	80.9857	192.38	136.683	132.032	314.302	223.167	36.6142	496.614	266.614	71.3699	307.216	2.10587	0.00338776	NA	NA
LOC_Os01g11240	1806.48	2067.71	1937.09	875.16	1394.61	1134.88	629.231	2201.96	1415.59	1197.64	1594.33	1395.98	865.544	2596.1	1730.82	583.538	1857.88	1220.71	992.931	1952.1	0.975259	0.0273459	NA	NA
LOC_Os01g11650	1583.24	1358.92	1471.08	450.082	1167.01	808.548	354.203	4232.51	2293.36	1232.89	2908.56	2070.72	252.328	1450.76	851.544	124.717	1692.73	908.726	666.242	2135.08	1.68017	9.76089e-05	NA	NA
LOC_Os01g11810	1069.2	205.587	637.393	1314.3	581.086	947.694	1900.19	372.14	1136.17	1138.56	125.305	631.935	221.032	91.1534	156.092	183.071	285.465	234.268	971.06	276.789	-1.81077	0.00365044	NA	NA
LOC_Os01g11910	58.7472	173.296	116.022	29.6929	122.997	76.3447	15.8349	49.4128	32.6239	57.1664	120.146	88.656	12.7142	37.8819	25.2981	14.8745	97.9073	56.3909	31.505	100.273	1.67029	0.0425882	NA	NA
LOC_Os01g12000	149.805	374.578	262.192	25.0046	153.988	89.4962	35.0036	264.049	149.527	11.4333	44.2254	27.8293	270.91	351	310.955	89.247	215.868	152.557	96.9007	233.951	1.27163	0.0184897	NA	NA
LOC_Os01g12110	1.46868	138.314	69.8914	1.56279	0.968477	1.26563	10.8344	61.766	36.3002	0	31.6949	15.8474	41.0767	105.359	73.2179	6.86515	10.6165	8.7408	10.3013	58.1198	2.49621	0.0300194	NA	NA
LOC_Os01g12210	155.68	17.222	86.451	207.85	13.5587	110.705	130.847	46.3245	88.5856	175.31	15.4789	95.3946	97.8016	16.5733	57.1875	176.206	16.5145	96.36	157.282	20.9453	-2.90866	0.000507363	NA	NA
LOC_Os01g12440	70.4966	671.657	371.077	260.985	495.86	378.423	350.869	389.126	369.997	177.216	581.564	379.39	508.568	1093.25	800.909	373.007	491.896	432.451	290.19	620.559	1.09657	0.0367411	NA	NA
LOC_Os01g12464	30.8423	398.258	214.55	151.59	165.61	158.6	90.0092	166.768	128.389	76.2219	760.677	418.449	323.723	870.101	596.912	415.342	817.467	616.404	181.288	529.813	1.5472	0.00817439	NA	NA
LOC_Os01g12520	35.2483	6.99643	21.1224	76.5765	32.9282	54.7524	115.012	1.54415	58.2779	74.3163	8.84508	41.5807	49.8788	5.32715	27.603	93.8238	4.71842	49.2711	74.1426	10.0599	-2.88169	0.00191654	NA	NA
LOC_Os01g12560	455.291	157.689	306.49	350.064	263.426	306.745	409.208	120.444	264.826	344.904	281.568	313.236	440.107	207.167	323.637	765.465	178.121	471.793	460.84	201.402	-1.19419	0.0493866	NA	NA
LOC_Os01g12570	26.4362	0.538187	13.4872	98.4555	0	49.2277	25.0025	0	12.5013	256.296	0.73709	128.517	19.5603	0.591905	10.0761	9.15354	0	4.57677	72.484	0.311197	-7.86369	2.90058e-07	NA	NA
LOC_Os01g12660	54.3411	421.939	238.14	70.3254	71.6673	70.9963	101.677	420.008	260.843	73.3635	378.127	225.745	90.9555	1248.92	669.938	176.206	415.221	295.713	94.478	492.647	2.3825	0.00180813	NA	NA
LOC_Os01g12710	2687.68	659.817	1673.75	1189.28	891.967	1040.62	1784.35	575.968	1180.16	1403.43	387.709	895.572	1324.23	325.548	824.891	1326.12	439.993	883.056	1619.18	546.834	-1.56609	0.00138204	NA	NA
LOC_Os01g12740	107.214	4.3055	55.7595	15.6279	6.77934	11.2036	16.6684	0	8.33418	94.3245	0.73709	47.5308	2.93405	0	1.46702	9.15354	0	4.57677	40.987	1.97032	-4.37866	0.000379628	NA	NA
LOC_Os01g12750	36.717	12.3783	24.5476	45.3208	16.4641	30.8924	10.001	0	5.00051	100.041	2.21127	51.1262	46.9448	7.10286	27.0238	28.6048	24.7717	26.6883	44.6049	10.488	-2.08846	0.0295042	NA	NA
LOC_Os01g12790	44.0604	43.5931	43.8268	1.56279	68.7619	35.1623	13.3347	44.7803	29.0575	26.6777	84.0282	55.3529	12.7142	58.5986	35.6564	4.57677	108.524	56.5503	17.1544	68.0477	1.98797	0.0204203	NA	NA
LOC_Os01g12940	1.46868	0	0.73434	1.56279	0	0.781393	0.833418	0	0.416709	35.2526	0	17.6263	1.95603	0	0.978016	0	0	0	6.84559	0	#NUM!	0.00234347	NA	NA
LOC_Os01g13040	0	21.5275	10.7637	0	0.968477	0.484238	0	20.0739	10.037	0	2.21127	1.10563	0.978016	1.18381	1.08091	0	3.53882	1.76941	0.163003	8.25063	5.66154	0.0068117	NA	NA
LOC_Os01g13180	0	8.0728	4.0364	0	5.81086	2.90543	0	1.54415	0.772074	0	4.42254	2.21127	2.93405	5.32715	4.1306	2.28838	3.53882	2.9136	0.870405	4.78605	2.45908	0.0418613	NA	NA
LOC_Os01g13570	561.035	109.79	335.413	382.882	241.151	312.017	298.364	199.195	248.779	696.477	182.061	439.269	203.427	80.4991	141.963	291.769	115.601	203.685	405.659	154.716	-1.39064	0.0309068	NA	NA
LOC_Os01g13690	3072.48	92.5682	1582.52	832.965	204.349	518.657	1639.33	138.973	889.154	4153.14	113.512	2133.33	1386.83	51.4957	719.161	1203.69	96.7277	650.209	2048.07	116.271	-4.1387	7.45182e-13	NA	NA
LOC_Os01g14100	387.731	327.218	357.475	945.485	741.853	843.669	475.048	100.37	287.709	335.376	110.563	222.97	898.796	494.833	696.815	842.125	312.596	577.361	647.427	347.905	-0.896023	0.0468801	NA	NA
LOC_Os01g14410	77.84	730.858	404.349	56.2603	400.949	228.605	20.8355	677.881	349.358	40.0165	611.784	325.9	18.5823	568.229	293.406	10.2977	246.538	128.418	37.3054	539.373	3.85383	6.86121e-09	NA	NA
LOC_Os01g14590	66.0906	26.3712	46.2309	42.1952	15.4956	28.8454	37.5038	7.72074	22.6123	115.286	5.89672	60.5911	83.1313	13.0219	48.0766	43.4793	25.9513	34.7153	64.6143	15.7429	-2.03715	0.0372668	NA	NA
LOC_Os01g14990	5.87472	0	2.93736	0	0	0	0.833418	0	0.416709	4.76387	0	2.38193	8.80214	0	4.40107	5.72096	1.17961	3.45028	4.33252	0.196601	-4.46186	0.00724495	NA	NA
LOC_Os01g15000	234.989	79.6517	157.32	95.3299	66.8249	81.0774	135.014	40.1479	87.5808	517.356	30.2207	273.788	262.108	52.0877	157.098	175.061	40.1066	107.584	236.643	51.5066	-2.19988	0.00822507	NA	NA
LOC_Os01g15120	1013.39	390.724	702.056	806.397	433.878	620.137	896.758	126.62	511.689	1089.02	145.944	617.482	772.632	74.58	423.606	969.131	156.888	563.009	924.555	221.439	-2.06185	4.38662e-05	NA	NA
LOC_Os01g15240	63.1532	50.5896	56.8714	1.56279	87.1629	44.3628	6.66735	72.575	39.6212	16.1971	266.826	141.512	5.86809	15.9814	10.9248	0	64.8783	32.4392	15.5748	93.0023	2.57806	0.00190918	NA	NA
LOC_Os01g15770	1708.07	598.464	1153.27	1515.9	768.971	1142.44	998.435	185.298	591.867	1753.1	298.521	1025.81	268.954	259.846	264.4	400.467	526.104	463.286	1107.49	439.534	-1.33325	0.0278495	NA	NA
LOC_Os01g15979	402.418	1459.56	930.991	490.715	753.475	622.095	545.889	2059.89	1302.89	210.563	1801.45	1006.01	711.995	2535.13	1623.56	640.748	1864.96	1252.85	500.388	1745.74	1.80272	0.000345892	NA	NA
LOC_Os01g15990	14.6868	42.5168	28.6018	21.879	21.3065	21.5927	15.8349	273.314	144.575	17.1499	73.709	45.4294	2.93405	36.6981	19.8161	6.86515	71.956	39.4106	13.225	86.5834	2.71083	0.0140017	NA	NA
LOC_Os01g16030	3212	1753.41	2482.71	2633.29	1814.93	2224.11	2595.26	565.158	1580.21	3235.62	878.611	2057.11	3129.65	235.578	1682.61	1748.33	962.559	1355.44	2759.03	1035.04	-1.41447	0.000733474	NA	NA
LOC_Os01g16120	566.91	158.227	362.569	356.315	184.011	270.163	362.537	37.0596	199.798	337.282	67.0752	202.178	195.603	12.43	104.017	67.5073	97.9073	82.7073	314.359	92.7849	-1.76045	0.00741226	NA	NA
LOC_Os01g16140	70.4966	282.01	176.253	59.3859	49.3923	54.3891	59.1727	489.495	274.334	40.9692	371.493	206.231	29.3405	31.371	30.3557	14.8745	145.092	79.983	45.7066	228.142	2.31946	0.0179697	NA	NA
LOC_Os01g16152	2263.23	1093.06	1678.15	2345.74	1276.45	1811.1	1891.03	548.173	1219.6	2569.63	916.94	1743.28	1925.71	371.716	1148.71	2260.92	1165.45	1713.19	2209.38	895.298	-1.3032	0.00291695	NA	NA
LOC_Os01g16390	1.46868	0	0.73434	1.56279	0	0.781393	0	0	0	0	0	0	1.95603	0	0.978016	1.14419	0	0.572096	1.02195	0	#NUM!	0.026739	NA	NA
LOC_Os01g16450	469.977	1718.43	1094.2	681.375	857.102	769.238	740.909	4217.07	2478.99	431.606	2235.59	1333.6	924.225	3031.74	1977.98	485.138	3033.95	1759.54	622.205	2515.65	2.01547	8.70178e-05	NA	NA
LOC_Os01g16714	402.418	138.314	270.366	665.747	140.429	403.088	116.679	43.2362	79.9574	342.046	48.6479	195.347	160.395	92.3372	126.366	171.629	117.961	144.795	309.819	96.8209	-1.67803	0.0245375	NA	NA
LOC_Os01g16810	10.2808	277.704	143.993	17.1906	33.8967	25.5437	40.8375	146.694	93.7658	2.85832	44.9625	23.9104	30.3185	622.684	326.501	35.47	31.8494	33.6597	22.8259	192.965	3.07959	0.00417616	NA	NA
LOC_Os01g16960	998.702	4944.86	2971.78	814.211	980.099	897.155	983.434	4323.62	2653.53	896.56	4812.46	2854.51	1156.99	4677.83	2917.41	1133.89	4767.97	2950.93	997.299	4084.47	2.03405	4.99411e-05	NA	NA
LOC_Os01g17214	396.543	120.554	258.549	143.776	150.114	146.945	396.707	157.503	277.105	363.007	213.019	288.013	961.39	133.179	547.284	497.724	62.5191	280.121	459.858	139.481	-1.72112	0.0138131	NA	NA
LOC_Os01g18210	2078.18	694.799	1386.49	3220.9	1680.31	2450.6	2030.21	1074.73	1552.47	2070.38	852.813	1461.59	1774.12	858.262	1316.19	2448.57	1138.32	1793.45	2270.39	1049.87	-1.11273	0.0137402	NA	NA
LOC_Os01g19120	0	2.15275	1.07637	0	2.90543	1.45272	0	0	0	0	0	0	0	1.77572	0.887858	0	5.89803	2.94902	0	2.12199	#DIV/0!	0.0190667	NA	NA
LOC_Os01g19440	55.8098	3.22912	29.5195	60.9486	6.77934	33.864	25.836	0	12.918	26.6777	1.47418	14.0759	3.91206	0	1.95603	0	3.53882	1.76941	28.864	2.50358	-3.52721	0.00961121	NA	NA
LOC_Os01g19610	129.244	61.3533	95.2985	117.209	57.1401	87.1745	125.013	0	62.5064	139.105	7.3709	73.2379	45.9667	0	22.9834	57.2096	4.71842	30.964	102.291	21.7638	-2.23268	0.00043351	NA	NA
LOC_Os01g19630	218.833	138.852	178.843	443.831	183.042	313.437	416.709	27.7947	222.252	232.477	28.0094	130.243	302.207	10.0624	156.135	347.834	10.6165	179.225	326.982	66.3962	-2.30004	7.48509e-05	NA	NA
LOC_Os01g19694	14.6868	326.68	170.683	15.6279	11.6217	13.6248	17.5018	389.126	203.314	4.76387	121.62	63.1918	20.5383	292.401	156.47	24.028	87.2909	55.6594	16.1911	204.79	3.66087	0.000358995	NA	NA
LOC_Os01g19740	8427.28	3439.01	5933.15	2709.87	2772.75	2741.31	5083.02	2387.25	3735.14	4712.42	1298.75	3005.58	1705.66	713.246	1209.45	1741.46	1690.38	1715.92	4063.28	2050.23	-0.986859	0.0398242	NA	NA
LOC_Os01g19850	46.9977	6.45824	26.728	68.7626	8.71629	38.7394	51.6719	6.1766	28.9243	80.9857	3.68545	42.3356	18.5823	2.95953	10.7709	36.6142	3.53882	20.0765	50.6024	5.25582	-3.26722	0.00290224	NA	NA
LOC_Os01g20030	0	2.69093	1.34547	0	0	0	0	0	0	0	1.47418	0.73709	0	7.69477	3.84738	0	3.53882	1.76941	0	2.56645	#DIV/0!	0.0122012	NA	NA
LOC_Os01g21310	696.154	171.682	433.918	631.365	406.76	519.063	268.361	54.0452	161.203	549.75	134.887	342.319	415.657	42.6172	229.137	237.992	156.888	197.44	466.546	161.147	-1.53365	0.00461871	NA	NA
LOC_Os01g21590	76.3713	1389.06	732.716	31.2557	172.389	101.822	25.836	784.428	405.132	79.0802	1589.9	834.491	103.67	318.445	211.057	51.4887	816.287	433.888	61.2836	845.085	3.78552	1.78818e-08	NA	NA
LOC_Os01g22590	0	11.8401	5.92006	0	6.77934	3.38967	0	15.4415	7.72074	0.952773	19.1643	10.0586	5.86809	15.9814	10.9248	17.1629	21.2329	19.1979	3.99729	15.0733	1.9149	0.0139048	NA	NA
LOC_Os01g22710	26.4362	32.2912	29.3637	9.37671	18.4011	13.8889	6.66735	94.1931	50.4302	7.62219	97.2958	52.459	7.82413	43.801	25.8126	9.15354	75.4948	42.3242	11.18	60.2462	2.42995	0.0230732	NA	NA
LOC_Os01g23940	4.40604	7.53462	5.97033	12.5023	19.3695	15.9359	0	9.26489	4.63245	0.952773	34.6432	17.798	0.978016	5.32715	3.15258	0	17.6941	8.84705	3.13985	15.6389	2.31637	0.0236959	NA	NA
LOC_Os01g24060	514.038	162.532	338.285	275.05	245.993	260.522	336.701	193.019	264.86	415.409	75.9202	245.665	199.515	36.6981	118.107	360.421	66.0579	213.239	350.189	130.037	-1.42921	0.0131847	NA	NA
LOC_Os01g24550	0	23.142	11.571	0	1.93695	0.968477	0	217.725	108.862	0.952773	102.455	51.7041	0	72.8043	36.4022	0	36.5678	18.2839	0.158796	75.7719	8.89835	3.84021e-08	NA	NA
LOC_Os01g24570	0	0	0	1.56279	0	0.781393	0	203.828	101.914	0.952773	8.84508	4.89892	0	54.4553	27.2276	0	23.5921	11.7961	0.41926	48.4534	6.85261	0.00164177	NA	NA
LOC_Os01g24680	4736.49	2308.28	3522.39	3824.14	2741.76	3282.95	3247	2235.93	2741.46	4785.78	2030.68	3408.23	3835.78	1233.53	2534.65	2821.58	1429.68	2125.63	3875.13	1996.64	-0.956666	0.0261489	NA	NA
LOC_Os01g25450	0	0	0	0	4.84238	2.42119	0	3.0883	1.54415	0	0	0	0	4.14334	2.07167	1.14419	4.71842	2.93131	0.190699	2.79874	3.87541	0.0381404	NA	NA
LOC_Os01g25460	2.93736	1.61456	2.27596	0	0	0	0	7.72074	3.86037	0.952773	14.0047	7.47874	0	7.10286	3.55143	0	3.53882	1.76941	0.648355	5.66362	3.12687	0.0298793	NA	NA
LOC_Os01g26120	418.574	162.532	290.553	328.185	127.839	228.012	215.855	67.9426	141.899	270.588	42.0141	156.301	193.647	44.9848	119.316	124.717	132.116	128.416	258.594	96.2381	-1.42601	0.0330318	NA	NA
LOC_Os01g27050	305.485	13.9929	159.739	159.404	94.9107	127.157	8.33418	7.72074	8.02746	345.857	8.84508	177.351	60.637	2.95953	31.7983	20.5955	22.4125	21.504	150.052	25.1402	-2.57739	0.0149095	NA	NA
LOC_Os01g27070	8.81208	0.538187	4.67513	28.1301	3.87391	16.002	8.33418	0	4.16709	3.81109	0	1.90555	0	0	0	2.28838	0	1.14419	8.56265	0.735349	-3.54156	0.0090793	NA	NA
LOC_Os01g27200	0	58.6624	29.3312	0	0.968477	0.484238	0	1.54415	0.772074	0.952773	9.58217	5.26747	2.93405	18.3491	10.6416	9.15354	16.5145	12.834	2.17339	17.6035	3.01784	0.0232027	NA	NA
LOC_Os01g28500	355.42	61.3533	208.387	254.734	18.4011	136.568	133.347	1.54415	67.4455	670.752	16.9531	343.853	290.471	2.36762	146.419	50.3445	16.5145	33.4295	292.511	19.5223	-3.9053	9.72777e-07	NA	NA
LOC_Os01g28970	0	21.5275	10.7637	0	2.90543	1.45272	0	0	0	0.952773	33.9061	17.4295	1.95603	26.6357	14.2959	2.28838	33.029	17.6587	0.866198	19.6673	4.50496	0.00265373	NA	NA
LOC_Os01g31420	0	9.68737	4.84368	0	0.968477	0.484238	0	1.54415	0.772074	0	55.2817	27.6409	0	9.47048	4.73524	0	33.029	16.5145	0	18.3302	#DIV/0!	5.6971e-05	NA	NA
LOC_Os01g31980	183.585	628.064	405.825	157.841	261.489	209.665	134.18	478.686	306.433	267.729	363.385	315.557	360.888	1347.18	854.032	160.187	606.318	383.252	210.735	614.186	1.54325	0.0136025	NA	NA
LOC_Os01g33110	1.46868	0.538187	1.00343	9.37671	1.93695	5.65683	2.50025	0	1.25013	3.81109	0.73709	2.27409	5.86809	0	2.93405	3.43258	0	1.71629	4.40957	0.535372	-3.04202	0.0314823	NA	NA
LOC_Os01g33360	0	1.07637	0.538187	0	0	0	0	1.54415	0.772074	0	2.21127	1.10563	2.93405	13.6138	8.27393	0	3.53882	1.76941	0.489008	3.66407	2.90552	0.035815	NA	NA
LOC_Os01g33810	0	14.531	7.26552	0	1.93695	0.968477	0	64.8543	32.4271	0	3.68545	1.84272	1.95603	78.1315	40.0438	0	31.8494	15.9247	0.326005	32.4981	6.63932	2.54094e-05	NA	NA
LOC_Os01g36070	994.296	884.779	939.538	234.418	551.063	392.741	400.874	1358.85	879.863	702.194	997.282	849.738	303.185	857.079	580.132	227.694	1111.19	669.442	477.11	960.041	1.00877	0.0253001	NA	NA
LOC_Os01g36460	935.549	284.701	610.125	465.71	264.394	365.052	461.714	49.4128	255.563	634.547	193.118	413.832	547.689	33.1467	290.418	146.457	198.174	172.315	531.944	170.491	-1.64158	0.00506949	NA	NA
LOC_Os01g36580	22.0302	76.4226	49.2264	15.6279	14.5272	15.0775	27.5028	208.46	117.981	12.3861	128.991	70.6884	11.7362	421.436	216.586	22.8838	53.0823	37.9831	18.6945	150.487	3.00895	0.00994403	NA	NA
LOC_Os01g36720	24.9675	17.7602	21.3639	3.12557	9.68477	6.40517	3.33367	44.7803	24.057	2.85832	25.7981	14.3282	0.978016	26.6357	13.8069	0	7.07764	3.53882	5.87719	21.9561	1.90143	0.0272691	NA	NA
LOC_Os01g36970	26.4362	150.154	88.2952	37.5069	40.676	39.0914	30.0031	106.546	68.2747	20.961	109.826	65.3937	57.7029	150.936	104.319	43.4793	184.019	113.749	36.0149	123.693	1.7801	0.0413919	NA	NA
LOC_Os01g37050	93.9955	122.707	108.351	18.7534	123.965	71.3592	26.6694	33.9713	30.3203	80.033	232.92	156.477	32.2745	156.855	94.5647	35.47	258.334	146.902	47.866	154.792	1.69326	0.0404779	NA	NA
LOC_Os01g37140	0	3.22912	1.61456	0	0.968477	0.484238	0	0	0	0	0	0	0	3.55143	1.77572	0	1.17961	0.589803	0	1.48811	#DIV/0!	0.0340127	NA	NA
LOC_Os01g37460	127.775	23.142	75.4586	95.3299	10.6532	52.9916	80.0082	6.1766	43.0924	316.321	1.47418	158.897	183.867	0.591905	92.2294	351.267	1.17961	176.223	192.428	7.20293	-4.73959	3.06734e-07	NA	NA
LOC_Os01g37590	168.898	1.61456	85.2563	59.3859	0.968477	30.1772	67.5069	0	33.7534	47.6387	0.73709	24.1879	18.5823	0	9.29115	6.86515	0	3.43258	61.4795	0.553355	-6.79576	5.15208e-07	NA	NA
LOC_Os01g37690	2317.58	299.77	1308.67	1247.1	689.555	968.329	1086.78	146.694	616.736	2556.29	456.259	1506.27	653.315	170.469	411.892	726.562	323.212	524.887	1431.27	347.66	-2.04155	0.000103521	NA	NA
LOC_Os01g37960	1797.66	4205.93	3001.8	1906.6	2099.66	2003.13	1856.86	3108.37	2482.61	1737.86	5129.41	3433.63	2587.83	3897.7	3242.76	1984.03	6866.49	4425.26	1978.47	4217.93	1.09215	0.0234198	NA	NA
LOC_Os01g38500	5.87472	22.6039	14.2393	3.12557	12.5902	7.85788	2.50025	95.7372	49.1187	5.71664	53.0705	29.3935	2.93405	33.1467	18.0404	5.72096	21.2329	13.4769	4.31203	39.7302	3.2038	0.0110874	NA	NA
LOC_Os01g38660	233.52	490.827	362.173	70.3254	181.105	125.715	85.8421	188.386	137.114	172.452	371.493	271.973	165.285	312.526	238.905	67.5073	395.168	231.338	132.489	323.251	1.28679	0.0413142	NA	NA
LOC_Os01g39330	79.3087	427.859	253.584	81.2648	99.7531	90.509	64.1732	234.711	149.442	78.1274	108.352	93.2398	368.712	504.303	436.508	49.2003	378.654	213.927	120.131	292.272	1.2827	0.0471268	NA	NA
LOC_Os01g39590	13.2181	0	6.60906	0	0	0	6.66735	0	3.33367	4.76387	0.73709	2.75048	0	0	0	0	0	0	4.10822	0.122848	-5.06356	0.0316632	NA	NA
LOC_Os01g39860	503.757	2569.84	1536.8	103.144	2497.7	1300.42	179.185	4166.11	2172.65	219.138	4094.53	2156.84	633.754	6124.44	3379.1	165.908	5330.64	2748.27	300.814	4130.55	3.77939	8.32667e-15	NA	NA
LOC_Os01g39890	496.414	1396.06	946.235	237.543	318.629	278.086	493.384	1403.63	948.507	593.578	1447.64	1020.61	309.053	330.283	319.668	224.262	1634.93	929.598	392.372	1088.53	1.47209	0.0174462	NA	NA
LOC_Os01g40020	13.2181	31.2148	22.2165	3.12557	15.4956	9.3106	1.66684	15.4415	8.55416	5.71664	8.10799	6.91231	0.978016	15.9814	8.47973	0	8.25724	4.12862	4.11753	15.7498	1.93548	0.0479377	NA	NA
LOC_Os01g40170	0	0	0	0	0.968477	0.484238	0	1.54415	0.772074	0	0.73709	0.368545	0	10.6543	5.32715	1.14419	3.53882	2.34151	0.190699	2.90714	3.93023	0.0467981	NA	NA
LOC_Os01g40200	712.309	763.149	737.729	467.273	698.272	582.772	576.725	1891.58	1234.15	899.418	1451.33	1175.37	528.129	1750.26	1139.2	247.146	1328.24	787.691	571.833	1313.81	1.20009	0.0189994	NA	NA
LOC_Os01g40280	161.555	546.26	353.907	532.91	347.683	440.297	270.028	738.103	504.065	303.935	497.536	400.735	361.866	1595.78	978.821	271.174	773.822	522.498	316.911	749.863	1.24255	0.0355451	NA	NA
LOC_Os01g40580	14.6868	44.6695	29.6782	4.68836	25.1804	14.9344	4.16709	32.4271	18.2971	17.1499	64.1268	40.6384	33.2525	52.0877	42.6701	8.00935	64.8783	36.4438	13.659	47.2283	1.7898	0.0443276	NA	NA
LOC_Os01g40870	161.555	397.72	279.637	62.5114	252.772	157.642	60.0061	517.29	288.648	154.349	407.611	280.98	20.5383	213.086	116.812	20.5955	166.324	93.46	79.9259	325.801	2.02725	0.000922918	NA	NA
LOC_Os01g41010	1480.43	401.487	940.958	1703.44	753.475	1228.46	1075.94	606.851	841.397	1461.55	571.982	1016.77	523.238	250.968	387.103	617.864	292.542	455.203	1143.74	479.551	-1.25401	0.0158819	NA	NA
LOC_Os01g41120	126.306	230.344	178.325	42.1952	59.0771	50.6361	75.0076	894.062	484.535	63.8358	371.493	217.665	216.141	793.153	504.647	22.8838	544.978	283.931	91.0617	482.185	2.40467	0.000876487	NA	NA
LOC_Os01g41770	20.5615	172.758	96.6598	43.758	111.375	77.5664	29.1696	846.194	437.682	19.0555	288.939	153.997	59.659	695.489	377.574	40.0467	443.532	241.789	35.3751	426.381	3.59134	3.48544e-06	NA	NA
LOC_Os01g42410	345.14	1865.89	1105.52	135.962	273.11	204.536	196.687	926.489	561.588	368.723	339.798	354.261	566.271	1057.14	811.707	259.732	483.639	371.685	312.086	824.346	1.40131	0.0278881	NA	NA
LOC_Os01g42460	1088.29	467.146	777.719	848.593	707.957	778.275	1147.62	355.154	751.386	1036.62	365.597	701.107	848.918	256.295	552.606	1149.91	184.019	666.966	1019.99	389.361	-1.38938	0.00465933	NA	NA
LOC_Os01g42550	8.81208	0	4.40604	0	0	0	5.00051	0	2.50025	11.4333	2.21127	6.82227	0	0	0	1.14419	0	0.572096	4.39834	0.368545	-3.57705	0.0291143	NA	NA
LOC_Os01g42690	30.8423	284.163	157.502	34.3813	50.3608	42.371	47.5048	123.532	85.5184	29.536	56.0188	42.7774	77.2632	248.008	162.636	57.2096	263.052	160.131	46.1229	170.856	1.88922	0.0400164	NA	NA
LOC_Os01g42800	966.391	248.104	607.248	662.621	455.184	558.903	745.076	296.477	520.776	666.941	109.089	388.015	401.964	74.58	238.272	652.19	100.267	376.228	682.531	213.95	-1.67362	0.000968946	NA	NA
LOC_Os01g43120	4592.56	1218.99	2905.78	4375.8	2919.96	3647.88	3927.9	2127.84	3027.87	4829.61	2130.19	3479.9	1925.71	1275.56	1600.63	3020.67	1395.47	2208.07	3778.71	1844.67	-1.03453	0.0193263	NA	NA
LOC_Os01g43280	26.4362	244.337	135.387	9.37671	20.338	14.8574	60.0061	296.477	178.241	19.0555	95.8217	57.4386	58.6809	149.16	103.921	26.3164	261.873	144.094	33.312	178.001	2.41777	0.00565194	NA	NA
LOC_Os01g44069	779.869	148.001	463.935	1022.06	485.207	753.634	298.364	32.4271	165.395	731.73	93.6104	412.67	424.459	26.6357	225.547	217.397	331.469	274.433	578.98	186.225	-1.63647	0.000672274	NA	NA
LOC_Os01g44120	7.3434	169.529	88.4361	1.56279	6.77934	4.17106	2.50025	9.26489	5.88257	20.0082	7.3709	13.6896	30.3185	115.422	72.87	4.57677	113.242	58.9095	11.0517	70.268	2.6686	0.0373497	NA	NA
LOC_Os01g44220	1293.91	275.014	784.46	850.155	510.387	680.271	905.092	441.627	673.359	1356.75	569.77	963.26	255.262	63.9258	159.594	351.267	204.072	277.669	835.405	344.133	-1.27951	0.0138358	NA	NA
LOC_Os01g44960	898.832	218.504	558.668	503.217	283.764	393.49	612.562	321.183	466.873	787.943	116.46	452.202	395.118	49.72	222.419	405.044	152.169	278.607	600.453	190.3	-1.65778	0.00252039	NA	NA
LOC_Os01g45274	26552.3	2872.84	14712.5	3922.59	1913.71	2918.15	15126.5	2504.61	8815.58	41208.4	1740.27	21474.3	6719.95	990.257	3855.1	9454.46	1853.16	5653.81	17164	1979.14	-3.11644	3.27424e-09	NA	NA
LOC_Os01g45320	4.40604	0	2.20302	1.56279	0	0.781393	0.833418	0	0.416709	4.76387	0	2.38193	0	0	0	0	0	0	1.92768	0	#NUM!	0.0138064	NA	NA
LOC_Os01g45380	362.764	98.4882	230.626	195.348	60.0456	127.697	214.189	16.9856	115.587	375.393	26.5352	200.964	266.02	19.5329	142.777	73.2283	60.1599	66.6941	247.824	46.9579	-2.39987	0.00158456	NA	NA
LOC_Os01g45420	0	6.99643	3.49822	0	4.84238	2.42119	0	0	0	0	0	0	0	0	0	0	1.17961	0.589803	0	2.16974	#DIV/0!	0.0369584	NA	NA
LOC_Os01g45430	0	0.538187	0.269093	0	0	0	0	3.0883	1.54415	0	2.94836	1.47418	0	1.77572	0.887858	0	0	0	0	1.39176	#DIV/0!	0.0274089	NA	NA
LOC_Os01g45450	83.7147	24.2184	53.9666	93.7671	29.0543	61.4107	45.0046	6.1766	25.5906	99.0884	10.3193	54.7038	130.076	15.9814	73.0288	9.15354	24.7717	16.9626	76.8007	18.4203	-2.05982	0.0481296	NA	NA
LOC_Os01g45470	3010.79	3137.63	3074.21	4468	1580.55	3024.28	5375.55	1425.25	3400.4	6695.14	874.926	3785.03	5410.38	2319.68	3865.03	5794.19	2536.15	4165.17	5125.68	1979.03	-1.37295	0.00143067	NA	NA
LOC_Os01g45640	619.783	845.492	732.637	185.971	425.161	305.566	180.852	1012.96	596.907	248.674	1187.45	718.063	462.601	1094.43	778.517	675.073	1025.08	850.076	395.492	931.763	1.23631	0.0113544	NA	NA
LOC_Os01g45670	71.9653	127.012	99.4887	46.8836	93.9423	70.4129	67.5069	236.255	151.881	130.53	486.479	308.505	43.0327	180.531	111.782	17.1629	252.436	134.799	62.8469	229.443	1.86822	0.0134666	NA	NA
LOC_Os01g45830	52.8725	126.474	89.6732	15.6279	59.0771	37.3525	16.6684	234.711	125.689	29.536	182.061	105.799	38.1426	156.855	97.4987	19.4513	171.043	95.2471	28.7164	155.037	2.43266	0.00377575	NA	NA
LOC_Os01g46340	2586.34	1454.18	2020.26	8379.66	4108.28	6243.97	4249.6	739.647	2494.62	5506.08	1801.45	3653.76	2954.59	1430.63	2192.61	2958.88	2505.48	2732.18	4439.19	2006.61	-1.14553	0.00731434	NA	NA
LOC_Os01g46350	2374.85	885.318	1630.09	2205.09	1272.58	1738.83	2788.62	1019.14	1903.88	2277.13	613.259	1445.19	1235.23	702.591	968.913	919.931	881.166	900.548	1966.81	895.675	-1.13481	0.0247278	NA	NA
LOC_Os01g46460	0	0	0	6.25114	0	3.12557	1.66684	0	0.833418	0.952773	0	0.476387	0.978016	0	0.489008	3.43258	0	1.71629	2.21356	0	#NUM!	0.0100905	NA	NA
LOC_Os01g47190	164.492	15.0692	89.7807	39.0696	28.0858	33.5777	60.8395	12.3532	36.5964	154.349	19.9014	87.1253	36.1866	4.14334	20.165	46.9119	4.71842	25.8152	83.6415	14.0452	-2.57414	0.007297	NA	NA
LOC_Os01g47690	1141.16	2689.32	1915.24	540.724	736.042	638.383	557.557	1349.59	953.571	1292.91	2125.03	1708.97	1063.1	2271.14	1667.12	1116.73	3011.53	2064.13	952.032	2030.44	1.09271	0.0279439	NA	NA
LOC_Os01g47710	0	8.61099	4.3055	3.12557	0.968477	2.04702	1.66684	12.3532	7.01001	0	2.94836	1.47418	0	26.0438	13.0219	1.14419	5.89803	3.52111	0.989433	9.47048	3.25876	0.0307954	NA	NA
LOC_Os01g48000	36.717	172.758	104.738	28.1301	47.4554	37.7928	13.3347	230.078	121.706	44.7803	171.005	107.893	18.5823	375.268	196.925	13.7303	213.509	113.62	25.8791	201.679	2.9622	0.00073926	NA	NA
LOC_Os01g48040	2.93736	127.55	65.2438	4.68836	23.2434	13.9659	7.50076	157.503	82.502	14.2916	134.15	74.221	25.4284	642.809	334.119	9.15354	166.324	87.739	10.6667	208.597	4.28954	5.79474e-06	NA	NA
LOC_Os01g48060	2407.17	946.671	1676.92	2970.86	2514.17	2742.51	3121.99	1108.7	2115.34	2116.11	750.357	1433.23	1443.55	1227.61	1335.58	2033.23	984.971	1509.1	2348.82	1255.41	-0.903772	0.0354757	NA	NA
LOC_Os01g48420	6776.49	4197.86	5487.17	8001.46	5572.62	6787.04	6949.88	2382.62	4666.25	5728.07	2879.07	4303.57	8853	2443.38	5648.19	10375.5	3554.15	6964.84	7780.74	3504.95	-1.15051	0.0056067	NA	NA
LOC_Os01g48530	8.81208	81.8044	45.3082	1.56279	20.338	10.9504	2.50025	168.312	85.4062	1.90555	45.6996	23.8026	23.4724	100.032	61.7522	5.72096	36.5678	21.1444	7.329	75.459	3.364	0.000710908	NA	NA
LOC_Os01g48710	54.3411	108.176	81.2584	82.8276	173.357	128.092	47.5048	268.682	158.093	40.0165	323.582	181.799	33.2525	145.017	89.1346	6.86515	49.5435	28.2043	44.1346	178.06	2.01238	0.00974689	NA	NA
LOC_Os01g48740	22.0302	95.2591	58.6446	45.3208	51.3293	48.325	61.673	157.503	109.588	17.1499	199.751	108.451	44.0107	182.899	113.455	51.4887	241.819	146.654	40.2789	154.76	1.94194	0.0217273	NA	NA
LOC_Os01g48750	54.3411	436.47	245.405	179.72	194.664	187.192	184.185	396.846	290.516	40.0165	386.235	213.126	411.745	1103.9	757.824	386.737	1311.72	849.229	209.458	638.307	1.60759	0.0034693	NA	NA
LOC_Os01g48910	2261.77	805.128	1533.45	1981.61	1729.7	1855.66	1065.11	401.479	733.294	1654.97	846.916	1250.94	1316.41	497.2	906.805	1433.67	583.905	1008.79	1618.92	810.721	-0.997756	0.0197012	NA	NA
LOC_Os01g49120	662.374	323.989	493.181	267.236	164.641	215.939	304.198	123.532	213.865	395.401	62.6526	229.027	138.878	114.83	126.854	292.913	62.5191	177.716	343.5	142.027	-1.27414	0.041064	NA	NA
LOC_Os01g49160	160.086	702.334	431.21	104.707	153.988	129.347	125.013	149.782	137.398	83.844	260.193	172.018	381.426	618.541	499.984	66.3631	515.488	290.926	153.573	400.054	1.38127	0.0368117	NA	NA
LOC_Os01g49310	1189.63	2714.08	1951.85	1942.54	1844.95	1893.75	1234.29	3014.18	2124.24	1381.52	3297	2339.26	1947.23	3523.61	2735.42	1590.43	3355.98	2473.2	1547.61	2958.3	0.934729	0.0387062	NA	NA
LOC_Os01g49529	3059.26	2463.82	2761.54	640.742	1259.02	949.881	978.433	1530.25	1254.34	1703.56	1917.91	1810.73	703.193	1943.22	1323.21	284.904	3850.23	2067.57	1228.35	2160.74	0.814808	0.0357381	NA	NA
LOC_Os01g49614	73.434	340.134	206.784	70.3254	155.925	113.125	24.1691	251.696	137.933	223.902	1141.75	682.827	89.9775	185.858	137.918	40.0467	632.269	336.158	86.9757	451.272	2.37531	0.000563472	NA	NA
LOC_Os01g50050	450.885	95.2591	273.072	340.687	104.595	222.641	336.701	83.384	210.043	584.05	64.1268	324.088	136.922	91.1534	114.038	229.983	127.397	178.69	346.538	94.3194	-1.87739	0.0103578	NA	NA
LOC_Os01g50160	414.168	1278.19	846.181	179.72	365.116	272.418	200.02	2764.03	1482.02	697.43	1239.05	968.239	283.625	918.637	601.131	302.067	900.039	601.053	346.172	1244.18	1.84563	0.00130396	NA	NA
LOC_Os01g50170	55.8098	2.69093	29.2504	1.56279	9.68477	5.62378	6.66735	0	3.33367	41.922	10.3193	26.1206	75.3072	0	37.6536	22.8838	5.89803	14.3909	34.0255	4.7655	-2.83592	0.0272706	NA	NA
LOC_Os01g50610	24.9675	243.799	134.383	25.0046	85.226	55.1153	48.3383	142.062	95.2	15.2444	128.254	71.749	41.0767	133.179	87.1277	35.47	184.019	109.744	31.6836	152.756	2.26942	0.00618944	NA	NA
LOC_Os01g50680	41.123	12.3783	26.7507	12.5023	2.90543	7.70386	33.3367	0	16.6684	25.7249	0	12.8624	16.6263	0.591905	8.60909	13.7303	7.07764	10.404	23.8406	3.82555	-2.63968	0.00957186	NA	NA
LOC_Os01g50750	349.546	63.5061	206.526	164.092	134.618	149.355	212.522	54.0452	133.283	266.777	40.5399	153.658	85.0874	15.3895	50.2385	54.9212	33.029	43.9751	188.824	56.8547	-1.73169	0.0235306	NA	NA
LOC_Os01g50820	5.87472	257.792	131.833	4.68836	57.1401	30.9142	0.833418	43.2362	22.0348	21.9138	106.878	64.3959	9.78016	77.5396	43.6599	4.57677	132.116	68.3463	7.94453	112.45	3.82318	6.03826e-05	NA	NA
LOC_Os01g51260	57.2785	24.2184	40.7485	157.841	42.613	100.227	110.011	4.63245	57.3218	53.3553	12.5305	32.9429	81.1753	2.36762	41.7715	18.3071	11.7961	15.0516	79.6615	16.3597	-2.28374	0.0152385	NA	NA
LOC_Os01g51380	734.34	715.789	725.064	811.086	248.899	529.992	1095.11	654.719	874.915	1341.5	355.277	848.391	1145.26	230.843	688.05	1176.23	554.415	865.322	1050.59	459.99	-1.19152	0.0136157	NA	NA
LOC_Os01g51490	2.93736	4.3055	3.62143	0	3.87391	1.93695	0	1.54415	0.772074	0	30.9578	15.4789	0	25.4519	12.726	0	2.35921	1.17961	0.48956	11.4154	4.54335	0.00402041	NA	NA
LOC_Os01g51890	678.53	1826.07	1252.3	598.547	643.069	620.808	645.066	1065.46	855.264	942.293	1543.47	1242.88	928.137	2303.1	1615.62	630.45	5014.51	2822.48	737.17	2065.95	1.48673	0.0154487	NA	NA
LOC_Os01g52010	3239.91	705.563	1972.73	1520.59	661.47	1091.03	2029.37	614.571	1321.97	2511.51	249.873	1380.69	542.799	140.282	341.54	743.725	428.197	585.961	1764.65	466.659	-1.91894	0.000261505	NA	NA
LOC_Os01g52260	174.773	2039.19	1106.98	145.339	340.904	243.121	106.678	630.013	368.345	211.516	1263.37	737.444	585.831	1561.45	1073.64	398.179	2199.97	1299.07	270.386	1339.15	2.30822	1.98523e-05	NA	NA
LOC_Os01g52750	820.992	111.943	466.467	400.073	184.979	292.526	349.202	38.6037	193.903	577.381	55.2817	316.331	140.834	12.43	76.6321	141.88	49.5435	95.7116	405.06	75.4635	-2.42429	0.000186084	NA	NA
LOC_Os01g52880	14.6868	118.401	66.544	17.1906	19.3695	18.2801	85.8421	174.489	130.165	1.90555	128.991	65.4481	26.4064	160.406	93.4064	43.4793	82.5724	63.0259	31.5851	114.038	1.8522	0.0255778	NA	NA
LOC_Os01g52900	1.46868	99.5646	50.5166	0	1.93695	0.968477	2.50025	38.6037	20.552	1.90555	92.1362	47.0209	6.84611	224.332	115.589	9.15354	110.883	60.0183	3.64569	94.5761	4.69721	2.33722e-05	NA	NA
LOC_Os01g52930	0	9.14918	4.57459	0	0	0	0	0	0	0	0	0	0	3.55143	1.77572	0	2.35921	1.17961	0	2.50997	#DIV/0!	0.0231682	NA	NA
LOC_Os01g53010	0	2.15275	1.07637	0	0	0	0	4.63245	2.31622	0	6.63381	3.3169	0	11.8381	5.91905	0	1.17961	0.589803	0	4.40612	#DIV/0!	0.00223113	NA	NA
LOC_Os01g53040	24.9675	434.855	229.911	7.81393	61.014	34.414	14.1681	214.637	114.402	9.52773	104.667	57.0972	47.9228	243.273	145.598	14.8745	406.964	210.919	19.8791	244.235	3.61895	1.31073e-05	NA	NA
LOC_Os01g53060	1575.89	799.208	1187.55	1845.65	1177.67	1511.66	1915.2	940.387	1427.79	1425.35	748.146	1086.75	1304.67	585.394	945.034	1849.01	679.453	1264.23	1652.63	821.709	-1.00806	0.0314367	NA	NA
LOC_Os01g53090	230.583	11.8401	121.211	67.1998	17.4326	42.3162	85.0087	0	42.5043	76.2219	0.73709	38.4795	47.9228	0.591905	24.2573	60.6422	1.17961	30.9109	94.5963	5.29688	-4.15857	4.55491e-06	NA	NA
LOC_Os01g53240	5525.17	2319.59	3922.38	3127.13	1715.17	2421.15	2033.54	1900.85	1967.19	5569.91	835.123	3202.52	1819.11	885.49	1352.3	1399.35	1659.71	1529.53	3245.7	1552.65	-1.06379	0.0439503	NA	NA
LOC_Os01g53430	8.81208	143.696	76.254	14.0651	40.676	27.3705	7.50076	265.594	136.547	2.85832	358.963	180.911	16.6263	301.872	159.249	40.0467	264.232	152.139	14.9849	229.172	3.93485	7.18059e-06	NA	NA
LOC_Os01g53670	255.55	322.374	288.962	62.5114	141.398	101.955	59.1727	315.006	187.09	246.768	273.46	260.114	99.7576	508.447	304.102	33.1816	225.305	129.243	126.157	297.665	1.23847	0.0290087	NA	NA
LOC_Os01g53750	80.7774	719.556	400.167	439.143	938.454	688.798	906.759	1329.51	1118.14	81.9385	1397.52	739.73	770.676	1776.31	1273.49	1273.49	894.141	1083.81	592.13	1175.92	0.989799	0.00587872	NA	NA
LOC_Os01g53800	644.75	712.021	678.386	184.409	695.366	439.888	204.187	1717.09	960.641	384.92	922.099	653.51	139.856	761.19	450.523	123.573	678.274	400.923	280.283	914.341	1.70585	0.000774983	NA	NA
LOC_Os01g53880	610.971	1135.57	873.273	260.985	435.815	348.4	503.385	992.888	748.136	708.863	797.531	753.197	648.424	1810.05	1229.24	560.654	2163.4	1362.03	548.88	1222.54	1.15532	0.0412807	NA	NA
LOC_Os01g53930	3717.23	1704.98	2711.1	2744.25	1919.52	2331.89	2966.14	1499.37	2232.75	3673.89	1317.92	2495.91	2261.17	760.598	1510.89	2511.5	1314.08	1912.79	2979.03	1419.41	-1.06955	0.0150959	NA	NA
LOC_Os01g54170	10.2808	0	5.14038	0	0	0	0	0	0	0	0	0	1.95603	0	0.978016	0	0	0	2.03946	0	#NUM!	0.0315635	NA	NA
LOC_Os01g54370	414.168	275.014	344.591	514.156	404.823	459.49	425.043	257.873	341.458	449.709	208.596	329.153	998.554	136.138	567.346	565.231	140.373	352.802	561.144	237.136	-1.24265	0.0349568	NA	NA
LOC_Os01g54450	0	98.4882	49.2441	0	30.0228	15.0114	0.833418	21.6181	11.2258	30.4887	54.5446	42.5167	1.95603	7.10286	4.52945	2.28838	53.0823	27.6853	5.92776	44.1431	2.89663	0.00148247	NA	NA
LOC_Os01g54600	656.5	2281.37	1468.94	314.12	427.098	370.609	342.535	972.814	657.674	1160.48	1236.1	1198.29	948.675	1657.93	1303.3	624.729	4092.05	2358.39	674.506	1777.89	1.39827	0.0148202	NA	NA
LOC_Os01g54700	120.432	521.503	320.967	53.1347	71.6673	62.401	39.1707	307.286	173.228	146.727	403.188	274.958	163.329	410.782	287.055	69.7957	797.414	433.605	98.7648	418.64	2.08364	0.00359075	NA	NA
LOC_Os01g54890	14.6868	71.0407	42.8637	4.68836	19.3695	12.0289	3.33367	40.1479	21.7408	9.52773	31.6949	20.6113	26.4064	95.2967	60.8516	25.1722	49.5435	37.3578	13.9692	51.1822	1.87339	0.0434923	NA	NA
LOC_Os01g55000	3270.75	568.864	1919.81	2873.96	1086.63	1980.3	2476.09	1090.17	1783.13	3507.16	496.061	2001.61	951.609	302.464	627.036	485.138	451.789	468.463	2260.78	665.996	-1.76324	0.00103893	NA	NA
LOC_Os01g55120	0	17.7602	8.88009	4.68836	5.81086	5.24961	3.33367	20.0739	11.7038	3.81109	70.0235	36.9173	0.978016	27.8195	14.3988	1.14419	28.3105	14.7274	2.32589	28.2998	3.60494	0.0051426	NA	NA
LOC_Os01g55540	3614.42	10845	7229.71	2427.01	4027.9	3227.45	2389.41	6343.36	4366.39	3904.46	15329.3	9616.86	3363.4	13409	8386.21	2781.53	14174.1	8477.84	3080.04	10688.1	1.79499	0.000113344	NA	NA
LOC_Os01g55750	1665.48	820.735	1243.11	1268.98	2406.66	1837.82	2124.38	455.524	1289.95	1099.5	728.982	914.241	2026.45	664.118	1345.28	3442.87	1051.03	2246.95	1937.95	1021.18	-0.924297	0.0301685	NA	NA
LOC_Os01g55870	1875.5	646.363	1260.93	823.588	679.871	751.729	1005.1	602.218	803.66	1271.95	298.521	785.237	932.049	524.428	728.238	850.135	286.644	568.39	1126.39	506.341	-1.15352	0.0228784	NA	NA
LOC_Os01g55940	5.87472	221.195	113.535	10.9395	12.5902	11.7648	13.3347	305.741	159.538	16.1971	215.967	116.082	27.3844	1111.01	569.195	22.8838	141.553	82.2183	16.1024	334.675	4.37742	9.06009e-06	NA	NA
LOC_Os01g56420	22.0302	135.085	78.5576	3.12557	49.3923	26.2589	21.6689	370.596	196.132	113.38	154.052	133.716	39.1206	195.921	117.521	5.72096	228.844	117.282	34.1744	188.981	2.46726	0.000479865	NA	NA
LOC_Os01g56450	32.3109	122.168	77.2397	15.6279	62.951	39.2894	7.50076	225.446	116.473	51.4498	78.1315	64.7906	45.9667	53.2715	49.6191	17.1629	69.5968	43.3798	28.3365	101.927	1.84681	0.046918	NA	NA
LOC_Os01g56570	16.1555	65.1206	40.638	3.12557	14.5272	8.82636	5.00051	254.785	129.893	8.57496	162.16	85.3673	39.1206	20.1248	29.6227	9.15354	37.7474	23.4505	13.5218	92.4107	2.77277	0.0168897	NA	NA
LOC_Os01g56880	561.035	850.335	705.685	215.664	572.37	394.017	363.37	1006.79	685.078	508.781	1143.96	826.372	595.612	688.386	641.999	461.109	1159.55	810.331	450.929	903.565	1.00273	0.0486559	NA	NA
LOC_Os01g57004	149.805	568.325	359.065	195.348	175.294	185.321	230.023	844.649	537.336	145.774	254.296	200.035	92.9115	1079.63	586.273	107.554	593.342	350.448	153.569	585.924	1.93182	0.00537004	NA	NA
LOC_Os01g57050	114.557	66.197	90.377	45.3208	30.0228	37.6718	23.3357	1.54415	12.4399	63.8358	5.89672	34.8663	44.0107	8.87858	26.4446	51.4887	17.6941	34.5914	57.0914	21.7056	-1.39521	0.0475053	NA	NA
LOC_Os01g57610	74.9026	297.617	186.26	26.5674	97.8162	62.1918	58.3393	189.93	124.135	46.6859	265.352	156.019	164.307	342.713	253.51	21.7397	346.804	184.272	65.4236	256.706	1.97223	0.00381454	NA	NA
LOC_Os01g57760	0	1.61456	0.80728	0	0	0	0	13.8973	6.94867	0	3.68545	1.84272	0.978016	1.18381	1.08091	0	4.71842	2.35921	0.163003	4.18326	4.68166	0.0235736	NA	NA
LOC_Os01g57770	273.174	993.493	633.334	150.027	291.512	220.769	226.69	379.861	303.275	165.783	855.024	510.403	497.81	462.278	480.044	265.453	1058.11	661.78	263.156	673.379	1.3555	0.0231384	NA	NA
LOC_Os01g58049	395.075	57.586	226.33	73.4509	78.4466	75.9488	292.53	32.4271	162.478	1126.18	92.1362	609.157	48.9008	40.8415	44.8711	77.8051	55.4415	66.6233	335.657	59.4798	-2.49651	0.0247863	NA	NA
LOC_Os01g58150	286.392	445.081	365.737	76.5765	104.595	90.586	46.6714	154.415	100.543	194.366	181.324	187.845	108.56	939.353	523.957	104.121	511.949	308.035	136.115	389.453	1.51663	0.0454014	NA	NA
LOC_Os01g58290	226.177	2270.07	1248.12	82.8276	1683.21	883.02	78.3413	2618.88	1348.61	133.388	7903.81	4018.6	120.296	1222.88	671.586	113.275	3309.97	1711.62	125.717	3168.14	4.65538	1.11022e-16	NA	NA
LOC_Os01g58300	2.93736	26.9093	14.9234	0	0	0	1.66684	9.26489	5.46586	0	19.9014	9.95071	6.84611	29.5953	18.2207	0	37.7474	18.8737	1.90838	20.5697	3.4301	0.00827932	NA	NA
LOC_Os01g58335	19.0928	187.289	103.191	0	8.71629	4.35815	10.001	30.883	20.442	33.3471	88.4508	60.8989	23.4724	269.909	146.691	9.15354	132.116	70.6347	15.8445	119.561	2.91569	0.00194393	NA	NA
LOC_Os01g58860	2.93736	13.9929	8.46511	0	4.84238	2.42119	0.833418	6.1766	3.50501	0	11.0563	5.52817	0.978016	18.941	9.95949	0	9.43685	4.71842	0.791465	10.741	3.76246	0.00431152	NA	NA
LOC_Os01g58910	301.079	9.68737	155.383	145.339	117.186	131.262	229.19	10.809	120	261.06	10.3193	135.69	34.2306	1.77572	18.0031	19.4513	56.6211	38.0362	165.058	34.3997	-2.26251	0.00253993	NA	NA
LOC_Os01g59060	5708.76	2325.51	4017.13	5474.44	2549.03	4011.73	4885.5	2550.93	3718.22	5978.65	3258.67	4618.66	3716.46	1339.48	2527.97	3645.4	2274.28	2959.84	4901.53	2382.98	-1.04046	0.0146976	NA	NA
LOC_Os01g59350	558.098	1050.54	804.32	210.976	257.615	234.295	153.349	529.643	341.496	71.458	429.723	250.591	320.789	876.612	598.7	466.83	474.202	470.516	296.917	603.056	1.02223	0.0441789	NA	NA
LOC_Os01g59360	1.46868	0	0.73434	1.56279	0	0.781393	0	0	0	0.952773	0	0.476387	0.978016	0	0.489008	0	0	0	0.827042	0	#NUM!	0.0311417	NA	NA
LOC_Os01g59510	2034.12	595.235	1314.68	2208.22	1269.67	1738.94	2349.41	1226.05	1787.73	2071.33	988.437	1529.88	1023	584.21	803.607	1649.93	500.153	1075.04	1889.33	860.627	-1.13442	0.0132295	NA	NA
LOC_Os01g59670	713.778	1141.49	927.636	937.671	1166.05	1051.86	1105.11	1991.95	1548.53	1116.65	1966.56	1541.6	644.512	1965.72	1305.11	672.785	2598.67	1635.73	865.085	1805.07	1.06114	0.0319141	NA	NA
LOC_Os01g59720	0	1.07637	0.538187	0	0	0	0	0	0	0	0.73709	0.368545	0	12.43	6.215	0	0	0	0	2.37391	#DIV/0!	0.0409545	NA	NA
LOC_Os01g59840	1982.72	1300.8	1641.76	631.365	1315.19	973.278	304.198	1033.04	668.617	1237.65	2319.62	1778.64	105.626	1343.03	724.329	106.41	1817.77	962.091	727.995	1521.58	1.06357	0.00117291	NA	NA
LOC_Os01g59870	4444.22	2482.66	3463.44	6723.1	4419.16	5571.13	5302.21	2388.8	3845.5	4801.98	2220.11	3511.05	4969.3	1422.94	3196.12	3343.33	3524.66	3434	4930.69	2743.06	-0.846006	0.0383773	NA	NA
LOC_Os01g59930	2987.29	5594.45	4290.87	1964.42	4125.71	3045.07	1899.36	6406.67	4153.02	2674.43	7950.25	5312.34	2276.82	2810.37	2543.59	2427.98	6028.97	4228.47	2371.72	5486.07	1.20984	0.0082626	NA	NA
LOC_Os01g60270	428.854	1297.03	862.942	387.571	497.797	442.684	369.204	654.719	511.962	524.025	932.419	728.222	599.524	1694.03	1146.78	417.63	1934.55	1176.09	454.468	1168.43	1.36231	0.0182212	NA	NA
LOC_Os01g60710	0	4.84368	2.42184	0	7.74781	3.87391	0	1.54415	0.772074	0	54.5446	27.2723	0	1.18381	0.591905	0	3.53882	1.76941	0	12.2338	#DIV/0!	0.00037982	NA	NA
LOC_Os01g60960	51.4038	128.089	89.7461	7.81393	48.4238	28.1189	12.5013	146.694	79.5977	45.7331	95.8217	70.7774	44.0107	324.956	184.483	8.00935	92.0093	50.0093	28.2454	139.332	2.30244	0.00460487	NA	NA
LOC_Os01g61210	1.46868	8.0728	4.77074	0	0	0	0	46.3245	23.1622	0	4.42254	2.21127	0	4.14334	2.07167	0	4.71842	2.35921	0.24478	11.2803	5.52617	0.00283571	NA	NA
LOC_Os01g61410	1296.84	447.233	872.039	310.994	285.701	298.347	587.56	294.932	441.246	675.516	400.24	537.878	430.327	78.1315	254.229	514.887	133.295	324.091	636.021	273.256	-1.21882	0.0238354	NA	NA
LOC_Os01g61510	17.6242	129.165	73.3945	4.68836	28.0858	16.3871	8.33418	52.5011	30.4176	22.8666	120.883	71.8746	33.2525	58.5986	45.9256	9.15354	106.165	57.659	15.9866	82.5663	2.36869	0.0099605	NA	NA
LOC_Os01g61570	63.1532	127.55	95.3518	35.9441	219.844	127.894	82.5084	697.955	390.232	34.2998	349.381	191.84	124.208	348.632	236.42	27.4606	280.746	154.103	61.2624	337.351	2.46118	0.000575192	NA	NA
LOC_Os01g61700	17.6242	0.538187	9.08117	28.1301	11.6217	19.8759	9.1676	3.0883	6.12795	12.3861	0	6.19303	9.78016	0.591905	5.18603	9.15354	0	4.57677	14.3736	2.64002	-2.4448	0.00811108	NA	NA
LOC_Os01g62060	146.868	44.1313	95.4996	109.395	18.4011	63.898	35.0036	1.54415	18.2739	80.033	7.3709	43.7019	49.8788	7.69477	28.7868	97.2563	37.7474	67.5019	86.4058	19.4816	-2.14902	0.00601438	NA	NA
LOC_Os01g62420	1232.22	5724.16	3478.19	1897.22	1631.88	1764.55	1403.48	1690.84	1547.16	1325.31	4330.4	2827.85	2466.56	6207.31	4336.93	2498.92	9156.1	5827.51	1803.95	4790.12	1.4089	0.00794345	NA	NA
LOC_Os01g62500	67.5592	54.3569	60.9581	132.837	43.5815	88.2091	237.524	57.1335	147.329	117.191	57.493	87.3421	221.032	40.8415	130.937	251.722	18.8737	135.298	171.311	45.38	-1.91649	0.0241367	NA	NA
LOC_Os01g62830	5.87472	76.9607	41.4177	6.25114	16.4641	11.3576	0.833418	15.4415	8.13745	5.71664	53.0705	29.3935	0.978016	41.4334	21.2057	0	38.927	19.4635	3.27566	40.3829	3.62389	0.00127833	NA	NA
LOC_Os01g62900	138.056	125.936	131.996	1108.01	109.438	608.726	303.364	55.5894	179.477	339.187	47.1737	193.181	379.47	87.602	233.536	559.51	35.3882	297.449	471.267	76.8545	-2.61634	0.000257076	NA	NA
LOC_Os01g62980	324.578	65.6588	195.118	101.581	34.8652	68.2231	85.0087	4.63245	44.8206	363.007	8.84508	185.926	152.57	47.9443	100.257	231.127	41.2862	136.207	209.645	33.872	-2.62979	0.000742696	NA	NA
LOC_Os01g63210	572.785	567.787	570.286	43.758	235.34	139.549	108.344	284.123	196.234	146.727	268.301	207.514	68.4611	221.964	145.213	43.4793	233.562	138.521	163.926	301.846	0.880771	0.0295358	NA	NA
LOC_Os01g63510	0	12.9165	6.45824	3.12557	2.90543	3.0155	1.66684	24.7064	13.1866	0	15.4789	7.73944	5.86809	105.359	55.6136	2.28838	2.35921	2.3238	2.15815	27.2876	3.66038	0.0197705	NA	NA
LOC_Os01g63620	737.277	139.929	438.603	542.287	270.205	406.246	309.198	145.15	227.174	423.031	105.404	264.218	530.085	113.646	321.865	286.048	107.344	196.696	471.321	146.946	-1.68142	0.00657644	NA	NA
LOC_Os01g64160	0	2.69093	1.34547	0	1.93695	0.968477	0	0	0	0	0	0	0	4.73524	2.36762	0	1.17961	0.589803	0	1.75712	#DIV/0!	0.0260766	NA	NA
LOC_Os01g64630	3868.5	5368.95	4618.73	1619.05	3566.9	2592.97	1320.97	5089.51	3205.24	5564.2	5898.19	5731.19	1872.9	4700.91	3286.91	1485.16	8746.78	5115.97	2621.8	5561.88	1.08502	0.00517912	NA	NA
LOC_Os01g64910	2.93736	6.45824	4.6978	0	1.93695	0.968477	0	20.0739	10.037	0	8.10799	4.05399	0	5.32715	2.66357	5.72096	2.35921	4.04009	1.44305	7.37725	2.35396	0.0373995	NA	NA
LOC_Os01g65070	1252.78	478.448	865.616	736.072	632.415	684.244	628.397	373.684	501.041	1053.77	475.423	764.595	563.337	204.799	384.068	625.873	257.154	441.514	810.038	403.654	-1.00487	0.0498715	NA	NA
LOC_Os01g65380	3072.48	4498.17	3785.32	2489.52	2816.33	2652.92	3062.81	10515.7	6789.23	3096.51	5451.52	4274.01	2054.81	9079.23	5567.02	2133.92	7518.81	4826.36	2651.67	6646.62	1.32572	0.00586197	NA	NA
LOC_Os01g65460	859.177	1851.9	1355.54	1536.22	1691.93	1614.07	1595.16	2561.74	2078.45	1010.89	2601.93	1806.41	2313.99	7688.85	5001.42	2439.42	3693.35	3066.38	1625.81	3348.28	1.04226	0.0376944	NA	NA
LOC_Os01g65480	935.549	1330.94	1133.24	393.822	511.356	452.589	469.215	997.52	733.367	996.601	1597.27	1296.94	391.206	1112.78	751.994	180.782	1660.89	920.834	561.196	1201.79	1.09861	0.0225526	NA	NA
LOC_Os01g65550	2797.83	4832.38	3815.11	4188.27	6577.89	5383.08	6278.97	15242.3	10760.6	3225.14	10925.9	7075.51	4530.17	8930.66	6730.42	3881.1	7781.86	5831.48	4150.25	9048.5	1.12448	0.0114146	NA	NA
LOC_Os01g66010	67.5592	452.615	260.087	31.2557	77.4781	54.3669	59.1727	125.076	92.1244	60.9775	104.667	82.8221	129.098	282.931	206.014	26.3164	140.373	83.3448	62.3966	197.19	1.66005	0.0403269	NA	NA
LOC_Os01g66170	1734.51	800.284	1267.4	1759.7	1229	1494.35	1399.31	744.28	1071.79	1704.51	686.231	1195.37	1037.67	474.116	755.895	1573.26	956.661	1264.96	1534.83	815.095	-0.913037	0.0483264	NA	NA
LOC_Os01g66610	568.379	178.678	373.528	140.651	257.615	199.133	152.516	9.26489	80.8902	352.526	39.8028	196.164	312.965	39.0657	176.015	187.648	357.421	272.534	285.781	146.975	-0.959342	0.0275162	NA	NA
LOC_Os01g66670	0	8.0728	4.0364	0	0	0	0	3.0883	1.54415	0	2.94836	1.47418	0	8.28667	4.14334	1.14419	0	0.572096	0.190699	3.73269	4.29085	0.0352423	NA	NA
LOC_Os01g67054	2960.86	7418.91	5189.88	2028.5	3386.76	2707.63	2766.95	7736.19	5251.57	6309.26	11397.6	8853.44	8469.62	8434.65	8452.13	4452.05	7568.35	6010.2	4497.87	7657.08	0.767551	0.043398	NA	NA
LOC_Os01g67360	1246.91	171.682	709.295	354.752	296.354	325.553	440.045	121.988	281.016	676.469	64.1268	370.298	95.8455	73.9881	84.9168	181.927	135.655	158.791	499.324	143.965	-1.79425	0.020885	NA	NA
LOC_Os01g67550	135.118	656.05	395.584	348.501	519.104	433.802	334.201	1031.49	682.846	86.7024	1285.48	686.093	348.174	990.849	669.511	688.804	797.414	743.109	323.583	880.065	1.44347	0.00386696	NA	NA
LOC_Os01g67830	0	5.92006	2.96003	1.56279	2.90543	2.23411	1.66684	6.1766	3.92172	0	12.5305	6.26526	0	4.14334	2.07167	1.14419	3.53882	2.34151	0.728969	5.86913	3.00922	0.0346516	NA	NA
LOC_Os01g67860	12686.5	49744.6	31215.5	12422.6	13426	12924.3	13367.2	29274	21320.6	12979.6	63379.4	38179.5	19095.8	78024.9	48560.3	14058.7	69911.7	41985.2	14101.7	50626.8	1.84403	0.000565796	NA	NA
LOC_Os01g68020	467.04	235.188	351.114	259.422	144.303	201.863	259.193	100.37	179.781	1015.66	31.6949	523.676	672.875	58.5986	365.737	637.315	130.936	384.126	551.917	116.848	-2.23981	0.000672746	NA	NA
LOC_Os01g68130	42.5917	4.84368	23.7177	40.6324	19.3695	30.001	26.6694	1.54415	14.1068	18.1027	4.42254	11.2626	18.5823	2.95953	10.7709	24.028	9.43685	16.7324	28.4344	7.09605	-2.00255	0.0422361	NA	NA
LOC_Os01g68260	73.434	32.2912	52.8626	85.9532	35.8336	60.8934	49.1717	1.54415	25.3579	74.3163	20.6385	47.4774	31.2965	10.6543	20.9754	25.1722	2.35921	13.7657	56.5573	17.2202	-1.71561	0.0315069	NA	NA
LOC_Os01g68370	4.40604	23.142	13.774	4.68836	5.81086	5.24961	2.50025	166.768	84.6342	7.62219	100.981	54.3017	21.5163	191.185	106.351	11.4419	29.4902	20.466	8.69585	86.2296	3.30978	0.00804595	NA	NA
LOC_Os01g68480	3997.74	924.605	2461.18	1398.69	1252.24	1325.47	1492.65	989.799	1241.23	1473.94	572.719	1023.33	1059.19	526.796	792.993	1210.56	544.978	877.767	1772.13	801.856	-1.14407	0.0284979	NA	NA
LOC_Os01g68598	539.005	71.5789	305.292	1681.56	1097.28	1389.42	1226.79	386.037	806.414	499.253	375.916	437.584	1131.56	188.818	660.191	1676.24	201.713	938.977	1125.74	386.891	-1.54087	0.000621106	NA	NA
LOC_Os01g68650	83.7147	475.757	279.736	103.144	98.7846	100.964	71.674	512.657	292.166	47.6387	230.709	139.174	288.515	173.428	230.971	144.168	670.016	407.092	123.142	360.225	1.54857	0.0268778	NA	NA
LOC_Os01g68670	8.81208	65.6588	37.2354	6.25114	0.968477	3.60981	4.16709	55.5894	29.8782	8.57496	95.0846	51.8298	4.89008	59.7824	32.3362	0	60.1599	30.08	5.44922	56.2073	3.36663	0.00689872	NA	NA
LOC_Os01g68680	878.27	572.631	725.451	384.445	546.221	465.333	246.692	1235.32	741.005	1305.3	2660.89	1983.1	231.79	1683.97	957.88	156.754	1098.21	627.484	533.875	1299.54	1.28343	0.00555247	NA	NA
LOC_Os01g68740	118.963	371.349	245.156	20.3162	456.153	238.234	36.6704	94.1931	65.4317	103.852	505.644	304.748	9.78016	76.3558	43.068	3.43258	333.829	168.631	48.8358	306.254	2.64872	0.000131592	NA	NA
LOC_Os01g68940	279.049	265.326	272.188	139.088	125.902	132.495	202.521	30.883	116.702	284.879	172.479	228.679	621.04	82.2748	351.657	578.961	167.504	373.233	350.923	140.728	-1.31824	0.0436851	NA	NA
LOC_Os01g69070	77.84	4.84368	41.3418	273.487	15.4956	144.492	63.3398	0	31.6699	116.238	0	58.1192	68.4611	1.77572	35.1184	32.0374	1.17961	16.6085	105.234	3.88244	-4.76049	9.31435e-07	NA	NA
LOC_Os01g69100	1125.01	1025.78	1075.4	275.05	508.45	391.75	299.197	1014.51	656.851	896.56	1952.55	1424.56	317.855	1073.72	695.786	374.151	1174.89	774.519	547.97	1124.98	1.03773	0.0218314	NA	NA
LOC_Os01g69120	5948.15	1319.63	3633.89	1920.66	1321	1620.83	4046.25	2700.72	3373.48	6958.1	2410.28	4684.19	2067.53	1386.24	1726.88	2542.4	1465.07	2003.73	3913.85	1767.16	-1.14716	0.0224541	NA	NA
LOC_Os01g69140	58.7472	54.3569	56.552	23.4418	48.4238	35.9328	15.8349	185.298	100.566	32.3943	167.319	99.8568	1.95603	26.0438	13.9999	4.57677	93.1889	48.8828	22.8252	95.7718	2.06898	0.0123837	NA	NA
LOC_Os01g69830	1164.66	738.393	951.528	1267.42	661.47	964.444	1010.1	151.327	580.715	2172.32	205.648	1188.99	1758.47	557.575	1158.02	1020.62	877.627	949.123	1398.93	532.006	-1.39481	0.00291544	NA	NA
LOC_Os01g69950	10291	3086.5	6688.77	7704.53	4362.02	6033.28	6253.14	4136.77	5194.96	11152.2	5018.84	8085.53	4621.12	2189.46	3405.29	5214.08	3751.15	4482.62	7539.35	3757.46	-1.00468	0.02243	NA	NA
LOC_Os01g70080	69.0279	467.146	268.087	107.832	174.326	141.079	169.184	339.713	254.448	349.668	618.418	484.043	195.603	542.185	368.894	52.6328	417.581	235.107	157.325	426.561	1.43901	0.0127698	NA	NA
LOC_Os01g70210	679.998	125.936	402.967	95.3299	40.676	68.003	297.53	7.72074	152.626	717.438	70.7606	394.099	251.35	21.9005	136.625	187.648	75.4948	131.571	371.549	57.0814	-2.70246	0.000159411	NA	NA
LOC_Os01g70280	0	2.69093	1.34547	0	0.968477	0.484238	0	6.1766	3.0883	0	3.68545	1.84272	2.93405	5.32715	4.1306	0	4.71842	2.35921	0.489008	3.92784	3.00581	0.016478	NA	NA
LOC_Os01g70310	785.743	312.687	549.215	704.816	764.128	734.472	1059.27	276.403	667.839	590.719	361.174	475.947	949.653	268.725	609.189	1584.71	319.673	952.19	945.819	383.798	-1.30122	0.0131175	NA	NA
LOC_Os01g70370	0	1.61456	0.80728	0	0	0	0	0	0	0	2.94836	1.47418	0	15.9814	7.99072	0	2.35921	1.17961	0	3.81726	#DIV/0!	0.00807808	NA	NA
LOC_Os01g70400	5529.58	801.36	3165.47	2717.68	1522.45	2120.06	2461.92	543.54	1502.73	4546.63	845.442	2696.04	480.206	436.234	458.22	717.409	719.56	718.484	2742.24	811.43	-1.75681	0.00461586	NA	NA
LOC_Os01g70410	1780.04	1499.93	1639.98	790.769	1202.85	996.809	2178.56	3903.61	3041.08	1351.99	3047.13	2199.56	487.052	1550.2	1018.63	350.123	2560.92	1455.52	1156.42	2294.11	0.988266	0.0183998	NA	NA
LOC_Os01g70950	1202.85	198.053	700.451	687.626	457.121	572.373	626.731	26.2505	326.491	1269.09	173.953	721.524	416.635	81.6829	249.159	613.287	182.839	398.063	802.703	186.65	-2.10453	5.32995e-05	NA	NA
LOC_Os01g71090	89.5894	1024.71	557.149	62.5114	151.082	106.797	125.846	716.485	421.166	94.3245	575.667	334.996	279.713	1932.57	1106.14	168.196	1165.45	666.824	136.697	927.661	2.76262	7.33834e-06	NA	NA
LOC_Os01g71130	0	61.8915	30.9458	0	0	0	0	4.63245	2.31622	0	2.94836	1.47418	0	18.941	9.47048	0	3.53882	1.76941	0	15.3253	#DIV/0!	0.000214686	NA	NA
LOC_Os01g71170	787.212	423.553	605.383	2455.14	1177.67	1816.4	2360.24	457.068	1408.65	1105.22	456.259	780.738	997.576	291.809	644.693	1059.52	698.327	878.924	1460.82	584.114	-1.32245	0.00819749	NA	NA
LOC_Os01g71624	23.4989	186.751	105.125	4.68836	1.93695	3.31266	2.50025	1.54415	2.0222	4.76387	86.2395	45.5017	5.86809	41.4334	23.6507	0	96.7277	48.3639	6.88657	69.1054	3.32694	0.0289544	NA	NA
LOC_Os01g71720	35.2483	0	17.6242	14.0651	1.93695	8.00101	15.0015	0	7.50076	10.4805	0	5.24025	1.95603	0	0.978016	0	0	0	12.7919	0.322826	-5.30833	0.000993211	NA	NA
LOC_Os01g72009	1075.07	6239.74	3657.41	1495.59	1643.51	1569.55	1364.31	7218.9	4291.6	1484.42	3476.85	2480.64	2180	5884.72	4032.36	1537.79	7439.78	4488.79	1522.86	5317.25	1.80389	0.000237318	NA	NA
LOC_Os01g72020	497.882	1356.77	927.326	273.487	514.261	393.874	395.874	1263.11	829.494	284.879	863.132	574.006	452.821	1458.45	955.638	171.629	1988.82	1080.22	346.095	1240.76	1.84198	0.000764474	NA	NA
LOC_Os01g72280	4.40604	0	2.20302	9.37671	5.81086	7.59379	5.00051	0	2.50025	0.952773	0	0.476387	13.6922	0	6.84611	8.00935	1.17961	4.59448	6.90627	1.16508	-2.56748	0.012553	NA	NA
LOC_Os01g72300	60.2158	0	30.1079	1.56279	0	0.781393	1.66684	0	0.833418	46.6859	1.47418	24.08	2.93405	0	1.46702	4.57677	0	2.28838	19.607	0.245697	-6.31835	0.000360579	NA	NA
LOC_Os01g72430	2302.89	489.212	1396.05	1061.13	829.985	945.558	1287.63	372.14	829.886	2584.87	404.662	1494.77	820.555	156.263	488.409	615.575	233.562	424.569	1445.44	414.304	-1.80275	0.000470235	NA	NA
LOC_Os01g72490	267.3	895.005	581.152	207.85	630.478	419.164	313.365	674.793	494.079	229.618	517.437	373.528	701.237	1533.03	1117.14	541.203	1126.52	833.863	376.762	896.212	1.25019	0.0138015	NA	NA
LOC_Os01g72590	0	6.45824	3.22912	0	14.5272	7.26358	0	7.72074	3.86037	0	26.5352	13.2676	0	4.14334	2.07167	0	2.35921	1.17961	0	10.2907	#DIV/0!	0.000123844	NA	NA
LOC_Os01g72730	7.3434	0	3.6717	3.12557	0	1.56279	3.33367	0	1.66684	0	0	0	0.978016	0	0.489008	0	0	0	2.46344	0	#NUM!	0.00911102	NA	NA
LOC_Os01g72740	79.3087	4.3055	41.8071	67.1998	2.90543	35.0526	20.002	49.4128	34.7074	108.616	1.47418	55.0452	10.7582	0.591905	5.67504	8.00935	3.53882	5.77408	48.9824	10.3714	-2.23965	0.00925046	NA	NA
LOC_Os01g72810	17.6242	252.41	135.017	4.68836	6.77934	5.73385	10.001	196.107	103.054	15.2444	106.878	61.0612	21.5163	394.209	207.863	8.00935	234.742	121.375	12.8473	198.521	3.94976	8.66964e-05	NA	NA
LOC_Os01g72834	760.776	1092.52	926.648	642.305	712.799	677.552	1019.27	2214.31	1616.79	266.777	633.897	450.337	749.16	1791.7	1270.43	506.877	2060.77	1283.82	657.528	1417.67	1.10839	0.0342851	NA	NA
LOC_Os01g73234	2295.55	481.139	1388.34	3020.86	1302.6	2161.73	2352.74	565.158	1458.95	1876.01	384.024	1130.02	1262.62	274.052	768.335	2025.22	313.775	1169.5	2138.83	553.458	-1.95028	1.6543e-05	NA	NA
LOC_Os01g73500	227.645	468.223	347.934	57.8231	231.466	144.645	56.6724	688.69	372.681	186.744	869.766	528.255	40.0986	417.293	228.696	52.6328	379.833	216.233	103.603	509.212	2.29721	0.000116291	NA	NA
LOC_Os01g73940	91.0581	19.9129	55.4855	29.6929	2.90543	16.2992	17.5018	10.809	14.1554	143.869	5.15963	74.5142	22.4944	5.32715	13.9108	29.749	27.1309	28.44	55.7275	11.8742	-2.23056	0.0453236	NA	NA
LOC_Os01g74190	4569.06	1081.22	2825.14	3469.38	2034.77	2752.08	3098.65	1666.14	2382.39	3234.67	1424.06	2329.36	1376.07	1057.14	1216.61	2112.18	1252.74	1682.46	2976.67	1419.34	-1.06847	0.0276773	NA	NA
LOC_Os01g74300	8826.76	22384.3	15605.5	15298.1	5106.78	10202.4	7121.56	2592.63	4857.09	14348.8	2195.79	8272.28	15432.1	3708.29	9570.2	8550.55	7545.94	8048.24	11596.3	7255.62	-0.676496	0.0114986	NA	NA
LOC_Os01g74490	71.9653	302.461	187.213	20.3162	23.2434	21.7798	22.5023	277.947	150.225	54.3081	384.024	219.166	74.3292	172.836	123.583	22.8838	162.786	92.8347	44.3842	220.55	2.31299	0.00703669	NA	NA
LOC_Os02g01210	148.337	4.84368	76.5901	26.5674	7.74781	17.1576	51.6719	0	25.836	82.8913	2.21127	42.5513	12.7142	0	6.3571	3.43258	1.17961	2.30609	54.269	2.66373	-4.34861	0.000443476	NA	NA
LOC_Os02g01220	221.771	25.833	123.802	67.1998	34.8652	51.0325	57.5059	74.1191	65.8125	147.68	36.8545	92.2672	79.2193	3.55143	41.3854	88.1028	21.2329	54.6679	110.246	32.7427	-1.75149	0.0299886	NA	NA
LOC_Os02g01410	4.40604	0	2.20302	7.81393	6.77934	7.29663	5.00051	0	2.50025	4.76387	0	2.38193	2.93405	0	1.46702	9.15354	0	4.57677	5.67865	1.12989	-2.32937	0.0053674	NA	NA
LOC_Os02g01520	508.163	1802.93	1155.54	1093.95	1163.14	1128.55	1140.95	1480.84	1310.89	457.331	2792.83	1625.08	1701.75	4932.94	3317.34	1305.52	2359.21	1832.37	1034.61	2421.98	1.2271	0.0118024	NA	NA
LOC_Os02g01800	49.9351	104.408	77.1717	64.0742	75.5412	69.8077	62.5064	160.591	111.549	12.3861	95.0846	53.7353	27.3844	248.008	137.696	82.3818	191.096	136.739	49.778	145.788	1.5503	0.0476507	NA	NA
LOC_Os02g01810	4.40604	8.61099	6.50851	1.56279	1.93695	1.74987	0	30.883	15.4415	0.952773	9.58217	5.26747	2.93405	86.4182	44.6761	0	16.5145	8.25724	1.64261	25.6576	3.96533	0.00948629	NA	NA
LOC_Os02g01940	183.585	479.525	331.555	312.557	560.748	436.653	265.86	784.428	525.144	145.774	970.747	558.261	301.229	509.63	405.43	345.546	554.415	449.98	259.092	643.249	1.31191	0.0219124	NA	NA
LOC_Os02g02000	828.335	20.9893	424.662	90.6416	40.676	65.6588	311.698	10.809	161.254	639.311	12.5305	325.921	71.3952	1.18381	36.2895	76.6609	10.6165	43.6387	336.34	16.1342	-4.38173	3.98716e-07	NA	NA
LOC_Os02g02100	0	5.38187	2.69093	0	0	0	0	0	0	0	0.73709	0.368545	0	0	0	0	5.89803	2.94902	0	2.00283	#DIV/0!	0.0363282	NA	NA
LOC_Os02g02310	49.9351	5.38187	27.6585	17.1906	7.74781	12.4692	63.3398	1.54415	32.442	23.8193	0.73709	12.2782	37.1646	2.36762	19.7661	1.14419	14.1553	7.64973	32.0989	5.3223	-2.5924	0.032337	NA	NA
LOC_Os02g02390	4947.98	1546.75	3247.36	3764.75	2443.47	3104.11	3352.01	2472.18	2912.1	6160.63	2955.73	4558.18	2455.8	1417.02	1936.41	3732.36	1959.33	2845.84	4068.92	2132.41	-0.93216	0.0369199	NA	NA
LOC_Os02g02524	229.114	410.098	319.606	676.686	556.874	616.78	421.71	129.709	275.709	922.284	367.071	644.678	1612.75	356.919	984.833	1151.06	296.081	723.569	835.6	352.792	-1.24399	0.0433852	NA	NA
LOC_Os02g02600	252.613	550.565	401.589	67.1998	184.979	126.089	75.8411	330.448	203.144	300.124	397.291	348.707	189.735	601.968	395.851	211.676	490.716	351.196	182.865	425.995	1.22006	0.0311906	NA	NA
LOC_Os02g02890	17133.6	18892	18012.8	28097.3	21614.5	24855.9	27851.2	8818.63	18334.9	15606.4	11412.4	13509.4	36305.9	9212.41	22759.2	35962	13101.9	24531.9	26826.1	13842	-0.954588	0.0329395	NA	NA
LOC_Os02g03230	6421.07	5074.03	5747.55	2198.84	4642.88	3420.86	2337.74	5074.07	3705.91	5505.12	10383.4	7944.25	1808.35	2817.47	2312.91	2197.99	8994.5	5596.25	3411.52	6164.39	0.853544	0.037103	NA	NA
LOC_Os02g03570	176.242	117.325	146.783	337.562	139.461	238.511	205.854	27.7947	116.825	102.9	15.4789	59.1892	123.23	14.7976	69.0138	113.275	79.0336	96.1543	176.51	65.6484	-1.42692	0.0223513	NA	NA
LOC_Os02g04540	185.054	284.701	234.877	234.418	274.079	254.248	326.7	867.812	597.256	80.033	432.672	256.352	582.897	801.44	692.168	152.178	708.943	430.56	260.213	561.608	1.10987	0.0390351	NA	NA
LOC_Os02g04640	55.8098	22.6039	39.2068	101.581	43.5815	72.5813	99.1768	1.54415	50.3605	107.663	8.84508	58.2542	85.0874	16.5733	50.8304	83.526	28.3105	55.9183	88.8074	20.2431	-2.13325	0.011244	NA	NA
LOC_Os02g05890	2041.46	662.508	1351.99	2017.56	1228.03	1622.79	1781.85	1155.02	1468.44	2187.57	935.367	1561.47	1154.06	543.961	849.01	1479.44	829.263	1154.35	1776.99	892.358	-0.99374	0.0325557	NA	NA
LOC_Os02g06460	20.5615	7.53462	14.0481	76.5765	69.7303	73.1534	100.844	15.4415	58.1426	59.0719	5.15963	32.1158	67.4831	6.51096	36.997	13.7303	1.17961	7.45496	56.3778	17.5928	-1.68015	0.0204752	NA	NA
LOC_Os02g06560	27.9049	118.401	73.153	4.68836	22.275	13.4817	2.50025	32.4271	17.4637	20.0082	24.324	22.1661	4.89008	4.73524	4.81266	1.14419	116.781	58.9626	10.1893	53.1572	2.38321	0.0481402	NA	NA
LOC_Os02g06640	18083.8	34052.7	26068.3	9272.01	19304.6	14288.3	9367.62	18268.8	13818.2	22043.4	32315.5	27179.4	12982.2	39705	26343.6	8502.49	45107	26804.7	13375.3	31458.9	1.2339	0.00595609	NA	NA
LOC_Os02g06950	5.87472	5.38187	5.62829	0	2.90543	1.45272	0	6.1766	3.0883	0.952773	12.5305	6.74165	0.978016	6.51096	3.74449	0	4.71842	2.35921	1.30092	6.37063	2.29191	0.0277668	NA	NA
LOC_Os02g07030	38.1857	148.001	93.0935	46.8836	56.1717	51.5276	88.3423	251.696	170.019	9.52773	113.512	61.5198	29.3405	308.974	169.157	37.7583	82.5724	60.1654	41.673	160.155	1.94228	0.0204399	NA	NA
LOC_Os02g07044	687.342	537.111	612.226	215.664	442.594	329.129	298.364	1400.54	849.453	623.114	1087.21	855.161	187.779	866.549	527.164	248.29	461.226	354.758	376.759	799.205	1.08492	0.0393863	NA	NA
LOC_Os02g07230	10132.4	3658.06	6895.24	8637.52	5733.38	7185.45	8315.01	5078.71	6696.86	9537.26	4867	7202.13	5238.25	3287.44	4262.85	7089.42	4690.11	5889.76	8158.31	4552.45	-0.841627	0.0486468	NA	NA
LOC_Os02g07260	3864.1	12781.4	8322.75	4546.14	4526.66	4536.4	4154.59	5926.44	5040.52	9497.24	18022.6	13759.9	7840.75	25672.7	16756.7	9481.92	18918.5	14200.2	6564.12	14308.1	1.12415	0.0232339	NA	NA
LOC_Os02g07270	0	4.84368	2.42184	0	1.93695	0.968477	0	0	0	2.85832	7.3709	5.11461	0	2.36762	1.18381	0	2.35921	1.17961	0.476387	3.14639	2.72349	0.0421398	NA	NA
LOC_Os02g07490	1135.29	1123.73	1129.51	2367.62	2060.92	2214.27	2063.54	713.397	1388.47	1194.78	673.7	934.239	2693.46	418.477	1555.97	3643.11	365.678	2004.39	2182.97	892.651	-1.29012	0.0053697	NA	NA
LOC_Os02g07680	2756.71	3648.91	3202.81	1465.89	1527.29	1496.59	1239.29	4306.63	2772.96	2477.21	5135.3	3806.26	870.434	2645.82	1758.13	1153.35	7036.35	4094.85	1660.48	4050.05	1.28634	0.00642932	NA	NA
LOC_Os02g07690	133.65	888.009	510.829	73.4509	200.475	136.963	43.3378	382.949	213.143	183.885	446.676	315.281	283.625	1277.33	780.478	74.3725	402.246	238.309	132.053	599.614	2.18291	0.000334439	NA	NA
LOC_Os02g07730	69.0279	308.919	188.974	196.911	245.993	221.452	106.678	492.583	299.631	139.105	642.742	390.924	42.0547	160.406	101.23	49.2003	283.105	166.153	100.496	355.625	1.82322	0.00489428	NA	NA
LOC_Os02g08110	264.362	24.7566	144.559	115.646	32.9282	74.2872	55.839	20.0739	37.9565	401.118	11.7934	206.455	10.7582	1.18381	5.97099	19.4513	16.5145	17.9829	144.529	17.8751	-3.01534	0.00740752	NA	NA
LOC_Os02g08260	2116.37	843.339	1479.85	2581.72	1484.67	2033.2	2532.76	945.019	1738.89	1826.47	767.31	1296.89	1557.98	409.598	983.789	2715.17	529.643	1622.41	2221.74	829.931	-1.42063	0.00154792	NA	NA
LOC_Os02g08364	2791.96	4706.98	3749.47	1814.39	2463.8	2139.1	1942.7	5015.4	3479.05	2723.98	6897.69	4810.83	1480.72	4929.98	3205.35	1038.93	5945.21	3492.07	1965.45	4993.18	1.3451	0.00244379	NA	NA
LOC_Os02g09240	102.808	269.632	186.22	134.4	369.958	252.179	39.1707	308.83	174	257.249	398.028	327.639	88.9994	236.17	162.585	25.1722	150.99	88.0809	107.966	288.935	1.42016	0.013435	NA	NA
LOC_Os02g09310	0	2.15275	1.07637	4.68836	9.68477	7.18656	0	26.2505	13.1253	20.961	13.2676	17.1143	0	1.77572	0.887858	0	43.6454	21.8227	4.27489	16.1295	1.91574	0.0284314	NA	NA
LOC_Os02g09390	20.5615	2.69093	11.6262	12.5023	0	6.25114	9.1676	0	4.5838	17.1499	0	8.57496	12.7142	2.36762	7.54091	1.14419	1.17961	1.1619	12.2066	1.03969	-3.55343	0.0108087	NA	NA
LOC_Os02g09930	2333.73	5579.92	3956.83	2814.58	3121.4	2967.99	2190.22	10171.3	6180.77	1990.34	8901.1	5445.72	2535.02	4192.46	3363.74	1575.55	2017.13	1796.34	2239.91	5663.89	1.33835	0.0108085	NA	NA
LOC_Os02g09940	5539.86	677.577	3108.72	3922.59	1504.04	2713.32	3226.16	1178.19	2202.17	3924.47	1166.81	2545.64	1153.08	433.275	793.178	1736.88	762.026	1249.45	3250.51	953.653	-1.76913	0.000293251	NA	NA
LOC_Os02g10030	14.6868	25.2948	19.9908	1.56279	16.4641	9.01345	0.833418	16.9856	8.90953	1.90555	16.216	9.06076	0	25.4519	12.726	0	42.4658	21.2329	3.16476	23.813	2.91159	0.00348067	NA	NA
LOC_Os02g10120	121.9	0.538187	61.2193	81.2648	6.77934	44.0221	177.518	0	88.7591	553.561	5.89672	279.729	26.4064	2.36762	14.387	33.1816	0	16.5908	165.639	2.59698	-5.99506	3.49289e-08	NA	NA
LOC_Os02g10310	3918.44	1483.24	2700.84	3189.65	2173.26	2681.45	1861.86	1090.17	1476.01	3980.69	1643.71	2812.2	2135.99	1108.05	1622.02	3063	1903.88	2483.44	3024.94	1567.05	-0.948851	0.0367406	NA	NA
LOC_Os02g10760	929.674	343.901	636.788	1348.68	599.487	974.086	485.049	64.8543	274.952	941.34	141.521	541.431	328.613	149.16	238.887	123.573	326.751	225.162	692.822	270.946	-1.35448	0.0209648	NA	NA
LOC_Os02g11130	38.1857	128.089	83.1371	9.37671	18.4011	13.8889	5.00051	54.0452	29.5229	18.1027	181.324	99.7134	6.84611	18.941	12.8935	4.57677	66.0579	35.3174	13.6814	77.8096	2.50773	0.0134245	NA	NA
LOC_Os02g11680	16.1555	2.15275	9.15411	17.1906	0.968477	9.07956	0	0	0	23.8193	0	11.9097	1.95603	0.591905	1.27397	0	0	0	9.85358	0.618855	-3.99297	0.0309605	NA	NA
LOC_Os02g11760	489.07	819.121	654.095	645.43	677.934	661.682	542.555	1636.8	1089.68	645.027	1227.25	936.141	432.283	1913.04	1172.66	485.138	793.875	639.506	539.917	1178	1.12553	0.0446828	NA	NA
LOC_Os02g11790	2.93736	118.401	60.6692	0	1.93695	0.968477	0.833418	44.7803	22.8069	6.66941	110.563	58.6164	4.89008	34.3305	19.6103	3.43258	44.825	24.1288	3.12714	59.1396	4.24121	0.000349	NA	NA
LOC_Os02g11870	1.46868	71.0407	36.2547	0	1.93695	0.968477	0	10.809	5.40452	7.62219	33.169	20.3956	10.7582	24.86	17.8091	1.14419	42.4658	21.805	3.49887	30.7136	3.13392	0.00467036	NA	NA
LOC_Os02g12090	7.3434	0.538187	3.94079	7.81393	1.93695	4.87544	0	0	0	7.62219	0	3.81109	1.95603	0	0.978016	0	0	0	4.12259	0.412523	-3.321	0.0326744	NA	NA
LOC_Os02g12550	0	0	0	0	0	0	0	0	0	0	11.0563	5.52817	0	2.95953	1.47976	0	3.53882	1.76941	0	2.92578	#DIV/0!	0.015172	NA	NA
LOC_Os02g12670	286.392	23.142	154.767	185.971	97.8162	141.894	75.8411	7.72074	41.7809	151.491	3.68545	77.5882	24.4504	11.2462	17.8483	34.3258	10.6165	22.4711	126.412	25.7045	-2.29804	0.00561105	NA	NA
LOC_Os02g12730	4251.83	894.467	2573.15	3203.71	2015.4	2609.56	3598.7	886.341	2242.52	4225.55	1205.88	2715.71	955.521	861.222	908.372	925.652	1199.66	1062.66	2860.16	1177.16	-1.28078	0.0221376	NA	NA
LOC_Os02g13710	76.3713	197.515	136.943	114.083	106.532	110.308	41.6709	114.267	77.969	87.6551	145.944	116.799	131.054	778.355	454.705	32.0374	297.261	164.649	80.4787	273.312	1.76387	0.0365698	NA	NA
LOC_Os02g13980	204.146	35.5203	119.833	135.962	92.0053	113.984	180.852	16.9856	98.9187	83.844	9.58217	46.7131	79.2193	3.55143	41.3854	36.6142	42.4658	39.54	120.106	33.3518	-1.84848	0.0132784	NA	NA
LOC_Os02g14110	1183.76	3278.64	2231.2	1990.99	2986.78	2488.89	1632.67	3323.01	2477.84	1277.67	4049.57	2663.62	2454.82	4118.48	3286.65	2722.03	5686.88	4204.46	1876.99	3907.23	1.05772	0.013875	NA	NA
LOC_Os02g14190	11.7494	57.586	34.6677	90.6416	72.6358	81.6387	29.1696	248.608	138.889	27.6304	218.179	122.904	47.9228	266.357	157.14	102.977	163.965	133.471	51.6819	171.222	1.72814	0.0229625	NA	NA
LOC_Os02g14440	328.984	80.1899	204.587	67.1998	98.7846	82.9922	273.361	3.0883	138.225	83.844	17.6902	50.7671	156.483	6.51096	81.4967	225.406	48.3639	136.885	189.213	42.438	-2.15658	0.00270073	NA	NA
LOC_Os02g14460	0	0	0	1.56279	0	0.781393	0	0	0	0	0	0	2.93405	0	1.46702	2.28838	0	1.14419	1.13087	0	#NUM!	0.039898	NA	NA
LOC_Os02g14480	302.548	437.008	369.778	78.1393	170.452	124.296	76.6745	645.454	361.064	196.271	455.521	325.896	220.054	564.086	392.07	29.749	474.202	251.975	150.573	457.787	1.60422	0.00527134	NA	NA
LOC_Os02g14630	13.2181	22.6039	17.911	3.12557	26.1489	14.6372	0	23.1622	11.5811	1.90555	20.6385	11.272	0	10.6543	5.32715	0	40.1066	20.0533	3.04154	23.8857	2.97328	0.00233201	NA	NA
LOC_Os02g15020	0	22.6039	11.3019	0	1.93695	0.968477	0	24.7064	12.3532	0	22.8498	11.4249	0	0	0	0	2.35921	1.17961	0	12.4094	#DIV/0!	0.000251824	NA	NA
LOC_Os02g15340	0	1.61456	0.80728	1.56279	0.968477	1.26563	2.50025	52.5011	27.5007	0	0.73709	0.368545	0	22.4924	11.2462	0	1.17961	0.589803	0.677173	13.2489	4.2902	0.0240639	NA	NA
LOC_Os02g15380	11.7494	6.99643	9.37293	3.12557	18.4011	10.7633	0	18.5298	9.26489	2.85832	47.9108	25.3846	0	2.36762	1.18381	0	7.07764	3.53882	2.95555	16.8806	2.51386	0.0151717	NA	NA
LOC_Os02g15430	0	1.07637	0.538187	4.68836	4.84238	4.76537	0	9.26489	4.63245	0	0.73709	0.368545	0	2.36762	1.18381	0	4.71842	2.35921	0.781393	3.83446	2.29491	0.0287921	NA	NA
LOC_Os02g15560	19.0928	143.158	81.1253	1.56279	8.71629	5.13954	6.66735	30.883	18.7752	68.5997	184.272	126.436	24.4504	64.5177	44.484	10.2977	130.936	70.617	21.7785	93.7472	2.10587	0.0135923	NA	NA
LOC_Os02g15640	1993	820.735	1406.87	1762.82	888.093	1325.46	1330.14	736.559	1033.35	2745.89	850.602	1798.25	626.908	465.829	546.369	1346.71	731.356	1039.04	1634.25	748.862	-1.12585	0.0349445	NA	NA
LOC_Os02g15780	2.93736	0	1.46868	1.56279	0	0.781393	1.66684	0	0.833418	0	0	0	0	0	0	1.14419	0	0.572096	1.21853	0	#NUM!	0.0294805	NA	NA
LOC_Os02g16070	5.87472	0	2.93736	0	0	0	0	0	0	8.57496	0	4.28748	0	0	0	0	0	0	2.40828	0	#NUM!	0.0222848	NA	NA
LOC_Os02g16709	1389.37	473.605	931.488	1926.91	1252.24	1589.58	1789.35	1093.26	1441.3	1176.67	555.029	865.852	778.501	495.425	636.963	1368.45	393.988	881.221	1404.88	710.591	-0.983353	0.0302856	NA	NA
LOC_Os02g17150	0	8.61099	4.3055	0	0	0	0	0	0	0	0	0	0	1.77572	0.887858	0	2.35921	1.17961	0	2.12432	#DIV/0!	0.0325366	NA	NA
LOC_Os02g17534	182.116	613.533	397.825	15.6279	177.231	96.4296	32.5033	582.144	307.324	66.6941	442.254	254.474	32.2745	474.708	253.491	22.8838	677.094	349.989	58.6833	494.494	3.07493	6.67304e-07	NA	NA
LOC_Os02g18410	1503.93	1850.83	1677.38	1298.67	1773.28	1535.98	2389.41	6097.84	4243.63	1389.14	6126.69	3757.92	1291.96	4729.32	3010.64	900.479	6247.19	3573.84	1462.27	4470.86	1.61235	0.00129621	NA	NA
LOC_Os02g18430	0	3.76731	1.88365	1.56279	6.77934	4.17106	2.50025	24.7064	13.6033	1.90555	7.3709	4.63822	0.978016	13.0219	6.99996	1.14419	14.1553	7.64973	1.34847	11.6335	3.1089	0.0209307	NA	NA
LOC_Os02g18450	7656.22	1166.79	4411.51	4124.19	2775.65	3449.92	2969.47	2134.01	2551.74	4617.14	2237.8	3427.47	1271.42	868.325	1069.87	1678.53	984.971	1331.75	3719.5	1694.59	-1.13417	0.0286249	NA	NA
LOC_Os02g18520	5.87472	12.9165	9.3956	1.56279	12.5902	7.07649	0.833418	57.1335	28.9835	0.952773	35.3803	18.1665	0	68.0691	34.0345	0	8.25724	4.12862	1.53728	32.3911	4.39715	0.000787669	NA	NA
LOC_Os02g18530	0	2.69093	1.34547	0	0.968477	0.484238	0.833418	16.9856	8.90953	0	14.0047	7.00235	0.978016	7.10286	4.04044	2.28838	7.07764	4.68301	0.683303	8.13838	3.57414	0.0147682	NA	NA
LOC_Os02g18630	5.87472	39.8258	22.8503	1.56279	31.9597	16.7613	4.16709	98.8255	51.4963	12.3861	151.84	82.1133	0.978016	37.29	19.134	4.57677	28.3105	16.4437	4.92424	64.6754	3.71524	0.000520309	NA	NA
LOC_Os02g18880	202.678	14.531	108.604	62.5114	11.6217	37.0666	74.1742	3.0883	38.6313	206.752	14.7418	110.747	11.7362	11.2462	11.4912	8.00935	4.71842	6.36389	94.3101	9.99125	-3.23868	0.0113095	NA	NA
LOC_Os02g18990	30.8423	0.538187	15.6902	53.1347	5.81086	29.4728	79.1747	1.54415	40.3594	298.218	0	149.109	7.82413	0.591905	4.20802	1.14419	1.17961	1.1619	78.3897	1.61078	-5.60483	0.000215259	NA	NA
LOC_Os02g19000	2.93736	0	1.46868	0	0	0	0.833418	0	0.416709	5.71664	0	2.85832	0	0	0	0	0	0	1.58124	0	#NUM!	0.0289588	NA	NA
LOC_Os02g19360	0	3.22912	1.61456	0	0.968477	0.484238	0	6.1766	3.0883	0	5.89672	2.94836	4.89008	8.28667	6.58838	0	0	0	0.815013	4.09293	2.32824	0.0348234	NA	NA
LOC_Os02g19640	575.722	162.532	369.127	384.445	197.569	291.007	262.527	55.5894	159.058	433.512	72.2348	252.873	112.472	43.801	78.1364	220.829	186.378	203.603	331.585	119.684	-1.47014	0.0228638	NA	NA
LOC_Os02g19924	944.361	321.836	633.098	804.835	399.981	602.408	640.065	211.548	425.807	1010.89	391.395	701.144	336.437	194.145	265.291	492.003	332.649	412.326	704.766	308.592	-1.19144	0.0367389	NA	NA
LOC_Os02g19970	1051.57	228.729	640.152	940.797	381.58	661.188	796.748	179.121	487.935	1483.47	273.46	878.464	519.326	81.6829	300.505	652.19	130.936	391.563	907.351	212.585	-2.09362	8.9419e-05	NA	NA
LOC_Os02g20260	1.46868	0	0.73434	0	0	0	0.833418	0	0.416709	1.90555	0	0.952773	0.978016	0	0.489008	0	0	0	0.864277	0	#NUM!	0.0323625	NA	NA
LOC_Os02g21320	0	0.538187	0.269093	0	0	0	0	6.1766	3.0883	0	0.73709	0.368545	0	6.51096	3.25548	0	2.35921	1.17961	0	2.72034	#DIV/0!	0.00838753	NA	NA
LOC_Os02g21340	493.476	6.45824	249.967	121.897	19.3695	70.6334	88.3423	3.0883	45.7153	479.245	1.47418	240.36	80.1973	1.77572	40.9865	113.275	0	56.6375	229.406	5.361	-5.41926	4.59115e-09	NA	NA
LOC_Os02g21350	16.1555	3.22912	9.6923	4.68836	1.93695	3.31266	2.50025	0	1.25013	10.4805	0	5.24025	9.78016	0.591905	5.18603	2.28838	1.17961	1.734	7.64886	1.15626	-2.72577	0.0410343	NA	NA
LOC_Os02g21810	104.276	2.15275	53.2145	14.0651	13.5587	13.8119	12.5013	0	6.25064	9.52773	0	4.76387	37.1646	0.591905	18.8783	8.00935	8.25724	8.13329	30.924	4.09343	-2.91735	0.00902523	NA	NA
LOC_Os02g21920	766.651	3476.69	2121.67	1597.17	1231.9	1414.53	1112.61	1670.77	1391.69	1234.79	1327.5	1281.15	1599.06	4679.6	3139.33	1033.21	7230.99	4132.1	1223.91	3269.57	1.4176	0.0180742	NA	NA
LOC_Os02g22070	1011.92	357.894	684.907	1017.37	713.767	865.57	1079.28	538.908	809.092	988.979	411.296	700.137	753.072	354.551	553.812	867.298	227.664	547.481	952.986	434.013	-1.13472	0.020185	NA	NA
LOC_Os02g22160	80.7774	1621.02	850.898	60.9486	106.532	83.7405	81.675	486.407	284.041	184.838	882.296	533.567	217.12	1398.08	807.6	73.2283	1250.38	661.805	116.431	957.453	3.03972	3.2418e-06	NA	NA
LOC_Os02g22260	4370.79	1611.33	2991.06	4961.84	2281.73	3621.79	4037.08	1460.76	2748.92	4186.49	1985.72	3086.1	3189.31	628.011	1908.66	4093.92	1567.7	2830.81	4139.9	1589.21	-1.38129	0.00105672	NA	NA
LOC_Os02g22680	0	9.14918	4.57459	0	0.968477	0.484238	0	7.72074	3.86037	0	42.0141	21.0071	1.95603	1.18381	1.56992	0	4.71842	2.35921	0.326005	10.9591	5.07109	0.00597469	NA	NA
LOC_Os02g22820	105.745	206.664	156.204	128.148	119.123	123.636	61.673	291.844	176.759	91.4662	374.442	232.954	109.538	377.635	243.587	123.573	319.673	221.623	103.357	281.563	1.44582	0.0456316	NA	NA
LOC_Os02g24740	66.0906	26.9093	46.5	56.2603	25.1804	40.7203	64.1732	16.9856	40.5794	24.7721	10.3193	17.5457	23.4724	0	11.7362	13.7303	1.17961	7.45496	41.4165	13.429	-1.62485	0.0382831	NA	NA
LOC_Os02g25680	1.46868	9.68737	5.57802	7.81393	5.81086	6.81239	0	24.7064	12.3532	1.90555	18.4272	10.1664	1.95603	42.6172	22.2866	3.43258	15.3349	9.38373	2.76279	19.4307	2.81413	0.0255743	NA	NA
LOC_Os02g25900	1113.26	687.803	900.531	703.254	1006.25	854.75	703.405	2635.86	1669.63	1250.99	2429.45	1840.22	337.415	1381.51	859.461	361.565	1685.66	1023.61	744.981	1637.75	1.13644	0.0201434	NA	NA
LOC_Os02g26580	2.93736	4.3055	3.62143	0	5.81086	2.90543	0.833418	7.72074	4.27708	0	4.42254	2.21127	1.95603	4.73524	3.34564	1.14419	11.7961	6.47013	1.14517	6.46516	2.49713	0.0480149	NA	NA
LOC_Os02g26600	16.1555	286.315	151.235	96.8927	197.569	147.231	193.353	202.284	197.818	8.57496	252.822	130.698	319.811	432.683	376.247	411.909	340.906	376.408	174.449	285.43	0.710327	0.0473166	NA	NA
LOC_Os02g27000	192.397	440.775	316.586	298.492	502.639	400.566	216.689	878.621	547.655	143.869	460.681	302.275	209.295	880.163	544.729	434.793	816.287	625.54	249.256	663.194	1.4118	0.0113813	NA	NA
LOC_Os02g27350	0	25.2948	12.6474	0	0	0	2.50025	32.4271	17.4637	1.90555	16.9531	9.42931	5.86809	121.932	63.9003	6.86515	49.5435	28.2043	2.85651	41.0251	3.84418	0.00258278	NA	NA
LOC_Os02g27360	286.392	700.719	493.556	193.785	188.853	191.319	229.19	900.239	564.714	304.887	818.907	561.897	438.151	2228.52	1333.34	346.69	854.035	600.363	299.849	948.546	1.66148	0.0103257	NA	NA
LOC_Os02g27370	0	0.538187	0.269093	1.56279	0.968477	1.26563	0.833418	12.3532	6.5933	0	5.89672	2.94836	0	17.1652	8.58262	0	1.17961	0.589803	0.399367	6.35024	3.99102	0.0242097	NA	NA
LOC_Os02g27680	0	0	0	0	3.87391	1.93695	0	0	0	0	2.21127	1.10563	0	4.14334	2.07167	0	1.17961	0.589803	0	1.90135	#DIV/0!	0.019716	NA	NA
LOC_Os02g27690	0	0	0	0	11.6217	5.81086	0.833418	0	0.416709	0	5.15963	2.57981	0	15.9814	7.99072	0	20.0533	10.0267	0.138903	8.80268	5.98579	0.00762703	NA	NA
LOC_Os02g27920	1.46868	0	0.73434	1.56279	0	0.781393	1.66684	0	0.833418	8.57496	0	4.28748	1.95603	0.591905	1.27397	0	0	0	2.53822	0.0986509	-4.68534	0.0290933	NA	NA
LOC_Os02g28180	0	1.61456	0.80728	0	0	0	0	12.3532	6.1766	0	0.73709	0.368545	0	1.77572	0.887858	0	7.07764	3.53882	0	3.92637	#DIV/0!	0.0042697	NA	NA
LOC_Os02g29960	458.228	59.2006	258.714	568.854	116.217	342.536	311.698	29.3388	170.519	637.405	36.1174	336.761	62.593	17.7572	40.1751	91.5354	30.6698	61.1026	355.052	48.2168	-2.88042	0.000202665	NA	NA
LOC_Os02g30090	0	1.61456	0.80728	0	0	0	0	0	0	0	0	0	0	6.51096	3.25548	0	2.35921	1.17961	0	1.74745	#DIV/0!	0.037032	NA	NA
LOC_Os02g30190	16.1555	27.4475	21.8015	0	9.68477	4.84238	0.833418	46.3245	23.5789	68.5997	42.7512	55.6754	4.89008	9.47048	7.18028	0	28.3105	14.1553	15.0798	27.3315	0.85795	0.0486515	NA	NA
LOC_Os02g30270	0	1.07637	0.538187	0	1.93695	0.968477	2.50025	7.72074	5.1105	6.66941	34.6432	20.6563	0.978016	12.43	6.70401	1.14419	7.07764	4.11091	1.88198	10.8142	2.5226	0.047023	NA	NA
LOC_Os02g30280	45.5291	86.1099	65.8195	12.5023	49.3923	30.9473	113.345	293.388	203.367	32.3943	291.888	162.141	41.0767	197.104	119.091	22.8838	271.309	147.097	44.6218	198.199	2.15113	0.00595855	NA	NA
LOC_Os02g30740	0	2.15275	1.07637	0	0.968477	0.484238	0	0	0	0	0	0	0	7.69477	3.84738	0	2.35921	1.17961	0	2.19587	#DIV/0!	0.0211259	NA	NA
LOC_Os02g30810	33.7796	141.005	87.3923	7.81393	73.6042	40.7091	6.66735	9.26489	7.96612	21.9138	83.2911	52.6025	21.5163	78.7234	50.1199	8.00935	119.14	63.5748	16.6167	84.1715	2.3407	0.0200275	NA	NA
LOC_Os02g31140	64.6219	393.953	229.287	117.209	170.452	143.83	145.015	177.577	161.296	50.497	214.493	132.495	212.229	539.817	376.023	127.005	910.656	518.831	119.43	401.158	1.74801	0.0149662	NA	NA
LOC_Os02g31840	0	7.53462	3.76731	0	0	0	0.833418	86.4723	43.6529	0	5.89672	2.94836	0.978016	17.1652	9.07163	1.14419	1.17961	1.1619	0.492604	19.7081	5.32221	0.00802646	NA	NA
LOC_Os02g32009	58.7472	238.417	148.582	89.0788	260.52	174.8	122.512	421.553	272.033	206.752	305.892	256.322	126.164	399.536	262.85	96.1121	357.421	226.766	116.561	330.556	1.50381	0.0174125	NA	NA
LOC_Os02g32280	284.924	379.96	332.442	106.269	225.655	165.962	235.857	677.881	456.869	469.717	785.001	627.359	148.658	521.468	335.063	80.0935	468.304	274.199	220.92	509.712	1.20616	0.0247262	NA	NA
LOC_Os02g32504	1296.84	312.687	804.765	426.64	448.405	437.523	399.207	118.899	259.053	666.941	112.038	389.489	210.273	62.15	136.212	156.754	238.28	197.517	526.11	215.41	-1.28828	0.0411333	NA	NA
LOC_Os02g32620	30.8423	103.332	67.0871	10.9395	22.275	16.6072	5.83393	72.575	39.2045	20.961	112.775	66.8679	30.3185	147.384	88.8514	10.2977	104.985	57.6413	18.1988	93.8877	2.36709	0.0101124	NA	NA
LOC_Os02g32680	0	1.61456	0.80728	0	0	0	0	3.0883	1.54415	0	0	0	0	0.591905	0.295953	0	1.17961	0.589803	0	1.07906	#DIV/0!	0.0436906	NA	NA
LOC_Os02g33060	130.712	314.301	222.507	56.2603	189.821	123.041	35.837	401.479	218.658	44.7803	579.353	312.066	32.2745	76.9477	54.6111	25.1722	175.761	100.467	54.1728	289.61	2.41847	0.00157548	NA	NA
LOC_Os02g33110	844.491	928.911	886.701	229.729	367.053	298.391	184.185	951.196	567.691	1450.12	1025.29	1237.71	401.964	1610.57	1006.27	271.174	871.729	571.451	563.611	959.126	0.767021	0.0476373	NA	NA
LOC_Os02g33149	2448.29	759.382	1603.84	2097.26	1694.83	1896.05	2022.71	1130.32	1576.51	2542	1281.8	1911.9	1122.76	556.983	839.872	1584.71	962.559	1273.63	1969.62	1064.31	-0.887996	0.0491861	NA	NA
LOC_Os02g33330	280.518	533.881	407.2	50.0091	96.8477	73.4284	81.675	166.768	124.222	96.2301	97.2958	96.763	186.801	927.515	557.158	20.5955	611.036	315.816	119.305	405.557	1.76525	0.0238505	NA	NA
LOC_Os02g33450	19317.5	7196.1	13256.8	17840.8	8912.89	13376.8	14791.5	5466.29	10128.9	21646.1	8609.95	15128	10125.4	3665.67	6895.53	8987.63	8256.06	8621.85	15451.5	7017.83	-1.13865	0.00824405	NA	NA
LOC_Os02g33580	2060.56	935.907	1498.23	1378.38	964.603	1171.49	889.257	492.583	690.92	1539.68	498.273	1018.98	1210.78	703.183	956.983	1445.11	458.867	951.991	1420.63	675.569	-1.07235	0.0263425	NA	NA
LOC_Os02g34250	0	4.84368	2.42184	0	0	0	0	0	0	0	0	0	0	20.1248	10.0624	0	4.71842	2.35921	0	4.94781	#DIV/0!	0.00793257	NA	NA
LOC_Os02g34580	66.0906	123.783	94.9368	9.37671	60.0456	34.7111	5.83393	20.0739	12.9539	24.7721	242.503	133.637	18.5823	44.9848	31.7835	9.15354	126.218	67.6857	22.3015	102.935	2.20651	0.0143619	NA	NA
LOC_Os02g34930	834.21	146.387	490.298	586.045	261.489	423.767	445.045	112.723	278.884	324.896	59.7043	192.3	103.67	18.3491	61.0094	97.2563	130.936	114.096	398.52	121.598	-1.71253	0.00989064	NA	NA
LOC_Os02g35090	1533.3	580.166	1056.73	431.329	220.813	326.071	330.034	196.107	263.07	757.455	173.953	465.704	501.722	100.624	301.173	383.304	237.101	310.203	656.191	251.461	-1.38378	0.0164391	NA	NA
LOC_Os02g35500	2023.84	1174.32	1599.08	1894.1	1553.44	1723.77	1768.51	739.647	1254.08	2122.78	913.991	1518.39	2084.15	508.447	1296.3	2334.15	634.628	1484.39	2037.92	920.746	-1.14622	0.00940722	NA	NA
LOC_Os02g35910	365.701	1521.45	943.578	426.64	541.379	484.009	429.21	586.777	507.994	716.485	988.437	852.461	1315.43	2324.41	1819.92	669.352	3766.48	2217.92	653.804	1621.49	1.31039	0.0298182	NA	NA
LOC_Os02g36150	46.9977	1.07637	24.0371	20.3162	2.90543	11.6108	0.833418	0	0.416709	57.1664	0.73709	28.9517	91.9335	0.591905	46.2627	59.498	5.89803	32.698	46.1242	1.86814	-4.62585	0.000271055	NA	NA
LOC_Os02g36350	0	52.7423	26.3712	4.68836	8.71629	6.70232	5.00051	27.7947	16.3976	2.85832	7.3709	5.11461	8.80214	38.4738	23.638	4.57677	31.8494	18.2131	4.32102	27.8246	2.68692	0.0389977	NA	NA
LOC_Os02g36414	45.5291	184.598	115.064	7.81393	20.338	14.076	10.8344	92.6489	51.7417	39.0637	134.887	86.9756	16.6263	40.8415	28.7339	6.86515	122.679	64.7721	21.1221	99.3322	2.23351	0.0147722	NA	NA
LOC_Os02g36440	1.46868	69.9643	35.7165	4.68836	21.3065	12.9974	0	4.63245	2.31622	1.90555	50.8592	26.3824	2.93405	9.47048	6.20226	0	34.2086	17.1043	1.83277	31.7402	4.11421	0.00167516	NA	NA
LOC_Os02g36680	2.93736	0	1.46868	0	0	0	2.50025	0	1.25013	0	0	0	2.93405	0	1.46702	1.14419	0	0.572096	1.58598	0	#NUM!	0.0162265	NA	NA
LOC_Os02g36810	5.87472	8.61099	7.24285	0	0	0	4.16709	24.7064	14.4367	0	3.68545	1.84272	0	2.95953	1.47976	0	5.89803	2.94902	1.67363	7.6434	2.19123	0.0426734	NA	NA
LOC_Os02g36830	46.9977	0	23.4989	43.758	2.90543	23.3317	83.3418	0	41.6709	89.5607	2.94836	46.2545	33.2525	0.591905	16.9222	6.86515	1.17961	4.02238	50.6293	1.27088	-5.31607	3.21458e-05	NA	NA
LOC_Os02g36850	1138.23	345.516	741.871	909.541	471.648	690.595	830.085	233.166	531.626	1202.4	247.662	725.031	469.448	109.502	289.475	524.04	232.382	378.211	845.623	273.313	-1.62946	0.00227269	NA	NA
LOC_Os02g36880	251.144	893.39	572.267	98.4555	522.977	310.716	153.349	833.84	493.595	382.062	856.498	619.28	131.054	894.961	513.007	81.2376	1189.04	635.14	182.884	865.118	2.24197	3.3149e-05	NA	NA
LOC_Os02g37000	61.6845	23.142	42.4133	93.7671	29.0543	61.4107	57.5059	12.3532	34.9295	57.1664	25.0611	41.1137	93.8895	24.2681	59.0788	89.247	14.1553	51.7011	75.5434	21.339	-1.82381	0.0448986	NA	NA
LOC_Os02g37010	7.3434	1.07637	4.20989	0	0	0	0	0	0	6.66941	0	3.33471	0.978016	0	0.489008	1.14419	0	0.572096	2.68917	0.179396	-3.90594	0.0426322	NA	NA
LOC_Os02g37100	0	53.2805	26.6403	1.56279	1.93695	1.74987	0.833418	16.9856	8.90953	0.952773	7.3709	4.16184	0.978016	54.4553	27.7166	2.28838	3.53882	2.9136	1.10256	22.928	4.37818	0.0165826	NA	NA
LOC_Os02g37160	39.6543	118.939	79.2968	9.37671	70.6988	40.0378	3.33367	149.782	76.5581	40.0165	242.503	141.259	106.604	66.2934	86.4485	2.28838	162.786	82.537	33.5456	135.167	2.01055	0.003211	NA	NA
LOC_Os02g37590	1634.64	5095.55	3365.1	4052.3	3605.64	3828.97	3609.53	6936.32	5272.93	2752.56	7564.01	5158.29	5398.65	13057.4	9228.04	3862.79	9279.96	6571.38	3551.75	7589.82	1.09554	0.0125915	NA	NA
LOC_Os02g38140	493.476	2079.55	1286.52	509.468	513.293	511.38	522.553	988.255	755.404	1714.99	2032.89	1873.94	1523.75	2123.76	1823.75	908.489	4376.34	2642.41	945.454	2019.02	1.09457	0.042308	NA	NA
LOC_Os02g38230	1.46868	56.5096	28.9892	9.37671	19.3695	14.3731	0.833418	20.0739	10.4537	0	16.216	8.10799	19.5603	37.29	28.4252	1.14419	30.6698	15.907	5.39722	30.0215	2.47571	0.00595927	NA	NA
LOC_Os02g38840	449.416	1689.91	1069.66	148.465	273.11	210.788	128.346	1031.49	579.919	207.705	714.24	460.972	674.831	2382.42	1528.62	283.76	914.195	598.977	315.42	1167.56	1.88815	0.000520992	NA	NA
LOC_Os02g38920	1797.66	14827.6	8312.63	1473.71	4456.93	2965.32	589.227	18656.4	9622.82	1848.38	37627	19737.7	2321.81	47214.5	24768.2	1620.18	29126.8	15373.5	1608.49	25318.2	3.97639	1.62093e-14	NA	NA
LOC_Os02g38930	0	110.328	55.1642	0	0	0	0.833418	10.809	5.82123	0.952773	103.93	52.4412	3.91206	69.2529	36.5825	8.00935	40.1066	24.058	2.2846	55.7378	4.60864	0.000471126	NA	NA
LOC_Os02g39155	1.46868	102.794	52.1312	3.12557	5.81086	4.46822	0.833418	20.0739	10.4537	15.2444	25.7981	20.5213	25.4284	14.7976	20.113	3.43258	89.6501	46.5413	8.2555	43.1541	2.38607	0.0461789	NA	NA
LOC_Os02g39360	4661.59	5537.94	5099.77	1233.04	2140.33	1686.69	1454.31	2614.24	2034.28	1803.6	3220.35	2511.97	1663.6	4056.92	2860.26	1148.77	4721.96	2935.37	1994.15	3715.29	0.8977	0.0246719	NA	NA
LOC_Os02g39400	502.288	1239.44	870.866	231.292	495.86	363.576	216.689	718.029	467.359	403.023	751.832	577.427	574.095	1650.82	1112.46	338.681	1026.26	682.469	377.678	980.374	1.37618	0.00946599	NA	NA
LOC_Os02g39620	2.93736	434.855	218.896	0	591.739	295.87	0.833418	809.134	404.984	0	1000.97	500.484	5.86809	545.737	275.802	1.14419	562.672	281.908	1.79718	657.517	8.51515	0	NA	NA
LOC_Os02g40190	5.87472	0	2.93736	0	0	0	1.66684	0	0.833418	0.952773	0	0.476387	0	0	0	2.28838	0	1.14419	1.79712	0	#NUM!	0.0177559	NA	NA
LOC_Os02g40410	452.353	196.976	324.665	1331.49	1049.83	1190.66	766.745	219.269	493.007	641.216	294.836	468.026	422.503	316.077	369.29	789.493	209.97	499.731	733.967	381.16	-0.94532	0.0382602	NA	NA
LOC_Os02g40500	201.209	330.447	265.828	37.5069	62.951	50.2289	28.3362	159.047	93.6918	41.922	117.934	79.9282	44.9887	229.067	137.028	68.6515	285.465	177.058	70.4357	197.485	1.48737	0.0304564	NA	NA
LOC_Os02g40710	0	50.5896	25.2948	0	0.968477	0.484238	0	0	0	0	1.47418	0.73709	1.95603	5.32715	3.64159	1.14419	10.6165	5.88032	0.516704	11.496	4.47565	0.0302439	NA	NA
LOC_Os02g40784	1561.21	4384.07	2972.64	4088.25	6738.66	5413.45	5408.05	5285.62	5346.84	827.96	9649.24	5238.6	4697.41	9930.39	7313.9	8766.8	8015.42	8391.11	4224.95	7333.9	0.795648	0.0199107	NA	NA
LOC_Os02g41650	32059.8	29039.5	30549.6	7749.85	16469.9	12109.9	6031.45	19550.5	12791	21315.4	32455.5	26885.5	7998.21	13084.7	10541.4	2998.93	35707.9	19353.4	13025.6	24384.7	0.904622	0.00943519	NA	NA
LOC_Os02g41860	2132.52	741.083	1436.8	1623.73	586.897	1105.32	1577.66	1332.6	1455.13	2631.56	308.841	1470.2	807.841	158.039	482.94	612.143	1321.16	966.651	1564.24	741.437	-1.07707	0.0141955	NA	NA
LOC_Os02g42330	1527.43	439.161	983.293	923.606	751.538	837.572	1120.95	535.82	828.384	1304.35	322.108	813.227	657.227	321.404	489.316	922.219	431.736	676.977	1075.96	466.961	-1.20425	0.0188236	NA	NA
LOC_Os02g42450	478.789	172.758	325.774	50.0091	16.4641	33.2366	120.846	15.4415	68.1436	314.415	13.2676	163.841	115.406	23.0843	69.2451	88.1028	53.0823	70.5925	194.595	49.0163	-1.98914	0.00638262	NA	NA
LOC_Os02g42620	41.123	0	20.5615	3.12557	0.968477	2.04702	2.50025	0	1.25013	7.62219	0	3.81109	1.95603	0	0.978016	2.28838	1.17961	1.734	9.76924	0.358014	-4.77016	0.0103415	NA	NA
LOC_Os02g42650	797.493	443.466	620.479	1809.71	1075.01	1442.36	1190.95	191.474	691.215	727.919	146.681	437.3	837.182	142.057	489.619	493.147	340.906	417.027	976.067	389.932	-1.32376	0.00333933	NA	NA
LOC_Os02g42800	11.7494	0	5.87472	0	0	0	2.50025	0	1.25013	2.85832	0	1.42916	0	0	0	0	0	0	2.85133	0	#NUM!	0.0130599	NA	NA
LOC_Os02g43030	5.87472	0	2.93736	0	0	0	0.833418	0	0.416709	3.81109	0	1.90555	1.95603	0	0.978016	8.00935	0	4.00467	3.4141	0	#NUM!	0.00246666	NA	NA
LOC_Os02g43290	264.362	508.049	386.205	237.543	309.913	273.728	116.679	430.818	273.748	179.121	343.484	261.303	122.252	346.856	234.554	25.1722	515.488	270.33	157.522	409.101	1.37691	0.0167927	NA	NA
LOC_Os02g43330	8.81208	3.76731	6.28969	14.0651	10.6532	12.3592	4.16709	0	2.08355	3.81109	0	1.90555	45.9667	1.18381	23.5753	201.378	1.17961	101.279	46.3667	2.79733	-4.05097	0.00578455	NA	NA
LOC_Os02g43600	8145.29	2221.1	5183.2	5404.11	2892.84	4148.48	5278.04	3597.87	4437.95	9553.46	4084.95	6819.2	3120.85	1820.11	2470.48	4143.12	2484.25	3313.69	5940.81	2850.19	-1.0596	0.0196538	NA	NA
LOC_Os02g43870	2693.56	872.939	1783.25	3111.51	1672.56	2392.03	2275.23	779.795	1527.51	2748.75	936.104	1842.43	900.753	597.824	749.288	967.987	799.773	883.88	2116.3	943.166	-1.16596	0.0222706	NA	NA
LOC_Os02g43940	330.453	847.645	589.049	187.534	594.645	391.09	110.011	637.733	373.872	165.783	1180.82	673.3	100.736	481.811	291.273	38.9025	894.141	466.522	155.57	772.799	2.31253	3.24741e-05	NA	NA
LOC_Os02g44090	20.5615	45.2077	32.8846	20.3162	9.68477	15.0005	69.1737	1.54415	35.3589	91.4662	19.1643	55.3153	116.384	8.28667	62.3353	123.573	28.3105	75.9417	73.5791	18.6997	-1.97628	0.0368813	NA	NA
LOC_Os02g44120	0	1.07637	0.538187	0	0	0	0	0	0	0	3.68545	1.84272	0	6.51096	3.25548	0	2.35921	1.17961	0	2.272	#DIV/0!	0.0148399	NA	NA
LOC_Os02g45030	0	3.22912	1.61456	0	0	0	0	0	0	0	7.3709	3.68545	0	0	0	0	1.17961	0.589803	0	1.96327	#DIV/0!	0.0342716	NA	NA
LOC_Os02g46180	0	15.6074	7.80371	0	3.87391	1.93695	0	10.809	5.40452	0	25.7981	12.8991	0	42.0253	21.0126	1.14419	20.0533	10.5987	0.190699	19.6945	6.69035	6.21051e-05	NA	NA
LOC_Os02g46500	0	19.9129	9.95646	0	1.93695	0.968477	0	1.54415	0.772074	0	0	0	3.91206	5.32715	4.6196	0	2.35921	1.17961	0.652011	5.18006	2.99	0.0433196	NA	NA
LOC_Os02g46690	57.2785	738.393	397.836	34.3813	74.5727	54.477	36.6704	230.078	133.374	54.3081	1043.72	549.014	67.4831	479.443	273.463	58.3538	629.91	344.132	51.4125	532.686	3.37309	8.72115e-06	NA	NA
LOC_Os02g46750	1746.26	455.844	1101.05	2211.34	1319.07	1765.2	1612.66	869.356	1241.01	1655.92	649.376	1152.65	611.26	397.168	504.214	738.004	588.623	663.314	1429.24	713.239	-1.00279	0.0477863	NA	NA
LOC_Os02g46850	1219	3160.77	2189.89	1001.75	1253.21	1127.48	955.931	4672.59	2814.26	937.529	3248.35	2092.94	2033.29	4131.5	3082.4	1361.59	3550.61	2456.1	1251.52	3336.17	1.41452	0.00300118	NA	NA
LOC_Os02g47090	7.3434	110.328	58.8359	3.12557	21.3065	12.216	2.50025	49.4128	25.9565	40.0165	86.9766	63.4965	4.89008	60.3743	32.6322	3.43258	55.4415	29.437	10.2181	63.9733	2.64635	0.00209208	NA	NA
LOC_Os02g47110	237.926	952.591	595.259	101.581	177.231	139.406	96.6765	362.875	229.776	350.621	813.01	581.815	195.603	879.571	537.587	112.131	1348.29	730.21	182.423	755.595	2.05032	0.000944442	NA	NA
LOC_Os02g47310	1440.77	439.161	939.967	1162.71	873.566	1018.14	1612.66	225.446	919.055	1522.53	404.662	963.597	1066.04	147.976	607.007	1418.8	279.567	849.183	1370.59	395.063	-1.79464	0.000129839	NA	NA
LOC_Os02g47510	798.961	28.5239	413.743	82.8276	117.186	100.007	204.187	40.1479	122.168	242.004	6.63381	124.319	37.1646	12.43	24.7973	36.6142	11.7961	24.2051	233.627	36.1196	-2.69335	0.00449451	NA	NA
LOC_Os02g47610	1355.59	196.976	776.284	681.375	360.273	520.824	895.091	294.932	595.012	1210.97	306.629	758.802	577.029	198.288	387.659	425.64	172.222	298.931	857.617	254.887	-1.75047	0.00230172	NA	NA
LOC_Os02g48060	0	24.7566	12.3783	9.37671	1.93695	5.65683	0	3.0883	1.54415	0	3.68545	1.84272	2.93405	20.1248	11.5294	1.14419	7.07764	4.11091	2.24249	10.1116	2.17284	0.0404341	NA	NA
LOC_Os02g48080	60.2158	507.51	283.863	32.8185	48.4238	40.6212	16.6684	91.1048	53.8866	40.0165	65.601	52.8087	90.9555	291.809	191.382	40.0467	305.518	172.782	46.7869	218.328	2.22232	0.0149878	NA	NA
LOC_Os02g48200	71.9653	160.918	116.442	14.0651	20.338	17.2015	20.002	123.532	71.767	54.3081	210.071	132.189	12.7142	124.892	68.8031	11.4419	242.999	127.22	30.7494	147.125	2.25841	0.00861119	NA	NA
LOC_Os02g48210	252.613	1683.99	968.3	87.516	127.839	107.677	118.345	711.853	415.099	461.142	1076.89	769.015	306.119	1315.21	810.666	154.466	1676.22	915.343	230.034	1098.67	2.25584	0.000152033	NA	NA
LOC_Os02g48340	923.799	2136.06	1529.93	779.83	875.503	827.667	755.91	1920.92	1338.42	1190.97	2011.52	1601.24	746.226	3123.48	1934.85	716.264	4292.59	2504.43	852.166	2393.35	1.48982	0.00500532	NA	NA
LOC_Os02g48360	2398.35	1997.75	2198.05	4261.72	3939.76	4100.74	4062.08	838.473	2450.28	2692.54	1457.96	2075.25	4266.1	470.565	2368.33	4929.18	1043.95	2986.57	3768.33	1624.74	-1.21371	0.00181225	NA	NA
LOC_Os02g48640	149.805	616.762	383.284	28.1301	93.9423	61.0362	82.5084	228.534	155.521	303.935	473.212	388.573	426.415	328.507	377.461	171.629	640.526	406.077	193.737	396.914	1.03473	0.0498878	NA	NA
LOC_Os02g48870	818.054	2049.42	1433.74	71.8881	730.232	401.06	143.348	1596.65	869.999	416.362	894.827	655.594	479.228	893.185	686.206	58.3538	1240.95	649.65	331.206	1234.21	1.89779	2.5476e-05	NA	NA
LOC_Os02g49060	327.515	21.5275	174.521	96.8927	50.3608	73.6267	29.1696	7.72074	18.4452	113.38	5.89672	59.6384	26.4064	3.55143	14.9789	6.86515	47.1842	27.0247	100.038	22.7069	-2.13935	0.042879	NA	NA
LOC_Os02g49680	4787.89	4056.85	4422.37	1633.11	2520.95	2077.03	1901.86	4851.72	3376.79	3177.5	6680.98	4929.24	889.016	2287.12	1588.07	966.842	4013.02	2489.93	2226.04	4068.44	0.869998	0.0201385	NA	NA
LOC_Os02g49710	5.87472	20.9893	13.432	0	10.6532	5.32662	2.50025	16.9856	9.74295	7.62219	22.8498	15.236	2.93405	4.73524	3.83464	0	17.6941	8.84705	3.1552	15.6512	2.31047	0.0399529	NA	NA
LOC_Os02g49730	1.46868	16.1456	8.80714	14.0651	29.0543	21.5597	4.16709	89.5606	46.8639	1.90555	28.0094	14.9575	7.82413	20.1248	13.9745	3.43258	55.4415	29.437	5.47718	39.7227	2.85846	0.0105483	NA	NA
LOC_Os02g49840	330.453	67.8116	199.132	200.037	158.83	179.433	180.018	12.3532	96.1858	205.799	38.3287	122.064	33.2525	30.7791	32.0158	72.0841	34.2086	53.1463	170.274	57.0519	-1.57751	0.0458299	NA	NA
LOC_Os02g49860	64.6219	221.733	143.177	23.4418	50.3608	36.9013	24.1691	69.4867	46.8279	23.8193	406.874	215.346	11.7362	108.911	60.3234	6.86515	143.912	75.3886	25.7756	166.879	2.69473	0.00243168	NA	NA
LOC_Os02g50040	931.143	456.921	694.032	1986.3	1244.49	1615.4	1147.62	285.668	716.642	887.032	389.183	638.108	784.369	262.806	523.587	811.232	606.318	708.775	1091.28	540.898	-1.0126	0.025316	NA	NA
LOC_Os02g50174	562.504	1858.36	1210.43	218.79	346.715	282.752	365.037	2208.13	1286.59	418.267	909.569	663.918	507.59	2570.64	1539.12	217.397	1608.98	913.19	381.598	1583.73	2.05321	0.000260815	NA	NA
LOC_Os02g50240	14410.7	16869.5	15640.1	5096.24	9262.51	7179.38	6989.05	16068.4	11528.7	6758.02	13330.3	10044.1	13667.8	15003	14335.4	5635.15	18584.7	12109.9	8759.48	14853.1	0.761843	0.0471339	NA	NA
LOC_Os02g50420	0	0	0	0	1.93695	0.968477	0	1.54415	0.772074	0	0	0	0	1.77572	0.887858	0	5.89803	2.94902	0	1.85914	#DIV/0!	0.0215267	NA	NA
LOC_Os02g50460	1.46868	45.2077	23.3382	0	1.93695	0.968477	0.833418	0	0.416709	0	1.47418	0.73709	8.80214	38.4738	23.638	0	11.7961	5.89803	1.85071	16.4815	3.1547	0.032836	NA	NA
LOC_Os02g50900	118.963	144.772	131.868	115.646	195.632	155.639	130.847	772.074	451.461	60.9775	315.474	188.226	127.142	312.526	219.834	92.6796	305.518	199.099	107.709	341	1.66263	0.0268247	NA	NA
LOC_Os02g50940	155.68	793.288	474.484	57.8231	142.366	100.095	111.678	429.273	270.476	288.69	505.644	397.167	321.767	495.425	408.596	120.14	878.807	499.473	175.963	540.8	1.61982	0.00723494	NA	NA
LOC_Os02g51020	4461.85	1003.72	2732.78	2395.75	1594.11	1994.93	3253.67	1412.9	2333.28	3831.1	1487.45	2659.27	921.291	513.182	717.236	1425.66	1168.99	1297.33	2714.89	1196.72	-1.1818	0.0211402	NA	NA
LOC_Os02g51340	0	3.76731	1.88365	0	0	0	0	0	0	2.85832	7.3709	5.11461	0	7.69477	3.84738	0	5.89803	2.94902	0.476387	4.12183	3.11308	0.0364411	NA	NA
LOC_Os02g51350	738.746	2319.59	1529.17	823.588	908.431	866.01	602.561	1392.82	997.692	2164.7	2181.05	2172.87	1350.64	2668.31	2009.47	923.363	5636.16	3279.76	1100.6	2517.73	1.19383	0.0222024	NA	NA
LOC_Os02g51510	0	0	0	0	0	0	3.33367	0	1.66684	4.76387	0	2.38193	0.978016	0	0.489008	0	0	0	1.51259	0	#NUM!	0.0334864	NA	NA
LOC_Os02g51570	2765.52	560.791	1663.16	1486.21	1096.32	1291.26	1790.18	752.001	1271.09	2433.38	613.996	1523.69	579.963	284.114	432.039	622.441	500.153	561.297	1612.95	634.562	-1.34587	0.0146421	NA	NA
LOC_Os02g51590	351.014	220.657	285.836	571.98	405.792	488.886	457.547	118.899	288.223	299.171	83.2911	191.231	448.909	80.4991	264.704	598.413	67.2375	332.825	454.506	162.729	-1.48182	0.00591334	NA	NA
LOC_Os02g51620	2103.15	440.237	1271.69	3036.49	1517.6	2277.05	2056.88	558.982	1307.93	2790.67	458.47	1624.57	871.412	541.593	706.503	750.59	528.464	639.527	1934.87	674.225	-1.52093	0.00269477	NA	NA
LOC_Os02g51660	16.1555	33.9058	25.0306	7.81393	50.3608	29.0874	35.837	126.62	81.2286	2.85832	102.455	52.6569	14.6702	332.651	173.66	26.3164	193.455	109.886	17.2752	139.908	3.0177	0.00141169	NA	NA
LOC_Os02g51750	1492.18	376.193	934.185	609.486	226.624	418.055	620.063	486.407	553.235	2088.48	538.075	1313.28	1035.72	906.207	970.963	621.296	488.357	554.827	1077.87	503.644	-1.09771	0.0464754	NA	NA
LOC_Os02g51790	8985.38	2665.64	5825.51	9112.6	4471.46	6792.03	6734.02	3664.27	5199.14	7680.31	3437.05	5558.68	3702.77	1968.68	2835.72	4698.05	3004.46	3851.26	6818.85	3201.92	-1.09059	0.0132693	NA	NA
LOC_Os02g51890	210.021	1148.49	679.256	284.427	545.252	414.84	598.394	1178.19	888.29	280.115	2151.56	1215.84	781.435	2419.71	1600.57	552.645	4522.61	2537.63	451.173	1994.3	2.14413	8.75233e-05	NA	NA
LOC_Os02g51930	30.8423	14.531	22.6867	21.879	9.68477	15.7819	25.0025	4.63245	14.8175	74.3163	2.94836	38.6323	96.8236	47.3524	72.088	61.7864	2.35921	32.0728	51.775	13.5847	-1.93027	0.0282899	NA	NA
LOC_Os02g52040	530.193	2609.67	1569.93	1026.75	827.079	926.915	1738.51	1354.22	1546.36	2171.37	4286.18	3228.77	1850.41	2822.2	2336.3	883.316	5499.32	3191.32	1366.76	2899.78	1.08519	0.0466386	NA	NA
LOC_Os02g52190	111.62	96.8737	104.247	15.6279	52.2977	33.9628	25.0025	165.224	95.1132	25.7249	149.629	87.677	12.7142	108.319	60.5164	10.2977	90.8297	50.5637	33.4978	110.529	1.72228	0.0146035	NA	NA
LOC_Os02g52380	4.40604	61.8915	33.1488	0	0.968477	0.484238	0.833418	21.6181	11.2258	2.85832	21.3756	12.117	11.7362	70.4367	41.0865	16.0187	48.3639	32.1913	5.97544	37.4424	2.64755	0.0110524	NA	NA
LOC_Os02g52480	1364.4	638.828	1001.62	2569.22	1335.53	1952.37	1689.34	520.378	1104.86	1884.59	480.583	1182.58	1296.85	504.895	900.872	702.534	659.4	680.967	1584.49	689.936	-1.19948	0.0152134	NA	NA
LOC_Os02g52540	0	82.3426	41.1713	7.81393	3.87391	5.84392	1.66684	15.4415	8.55416	0	22.1127	11.0563	2.93405	100.624	51.779	1.14419	66.0579	33.6011	2.25983	48.4088	4.42098	0.000631043	NA	NA
LOC_Os02g52550	556.629	1516.07	1036.35	345.376	443.562	394.469	726.741	2845.87	1786.3	426.842	1475.65	951.248	1241.1	1357.24	1299.17	312.364	1441.48	876.922	601.509	1513.31	1.33105	0.00891537	NA	NA
LOC_Os02g52560	660.906	939.136	800.021	214.102	583.023	398.562	253.359	1514.81	884.085	550.703	1561.89	1056.3	288.515	798.48	543.497	123.573	993.228	558.401	348.526	1065.1	1.61164	0.00124405	NA	NA
LOC_Os02g52744	1993	1088.21	1540.61	1964.42	1249.34	1606.88	1846.86	898.695	1372.77	1561.6	862.395	1212	1702.73	670.037	1186.38	2003.48	1067.54	1535.51	1845.35	972.703	-0.92382	0.0445582	NA	NA
LOC_Os02g52850	27.9049	182.445	105.175	31.2557	46.4869	38.8713	14.1681	128.164	71.1662	17.1499	84.7653	50.9576	81.1753	122.524	101.85	28.6048	130.936	79.7705	33.3765	115.887	1.79582	0.0283625	NA	NA
LOC_Os02g52930	82.246	16.1456	49.1958	90.6416	35.8336	63.2376	46.6714	1.54415	24.1078	64.7886	0.73709	32.7628	27.3844	11.8381	19.6113	27.4606	11.7961	19.6283	56.5321	12.9824	-2.12251	0.0175242	NA	NA
LOC_Os02g52940	8273.07	3769.46	6021.27	5997.97	3933.95	4965.96	6770.69	4238.69	5504.69	10822.6	5851.76	8337.15	5140.45	2458.18	3799.32	5857.12	3049.28	4453.2	7143.64	3883.55	-0.879282	0.036581	NA	NA
LOC_Os02g53240	0	7.53462	3.76731	4.68836	65.8564	35.2724	0	66.3984	33.1992	0	11.0563	5.52817	8.80214	32.5548	20.6785	6.86515	112.063	59.4639	3.39261	49.2439	3.85948	0.000323128	NA	NA
LOC_Os02g53570	2.93736	0	1.46868	0	0	0	0	0	0	2.85832	0	1.42916	4.89008	0	2.44504	0	0	0	1.78096	0	#NUM!	0.0145635	NA	NA
LOC_Os02g53580	44.0604	1.61456	22.8375	12.5023	8.71629	10.6093	29.1696	9.26489	19.2173	24.7721	2.21127	13.4917	18.5823	2.95953	10.7709	11.4419	2.35921	6.90057	23.4214	4.52096	-2.37313	0.0395992	NA	NA
LOC_Os02g53994	892.957	392.338	642.648	1101.76	537.505	819.634	726.741	151.327	439.034	827.96	384.761	606.36	507.59	271.684	389.637	653.334	602.779	628.056	785.058	390.066	-1.00908	0.0427847	NA	NA
LOC_Os02g54060	3787.72	1201.77	2494.75	2226.97	1563.12	1895.05	3158.66	1919.38	2539.02	4637.15	1881.05	3259.1	2576.09	964.213	1770.15	3025.24	946.044	1985.64	3235.31	1412.6	-1.19555	0.00746092	NA	NA
LOC_Os02g54190	182.116	20.4511	101.284	271.925	113.312	192.618	244.192	33.9713	139.081	107.663	21.3756	64.5195	46.9448	11.2462	29.0955	45.7677	40.1066	42.9371	149.768	40.0771	-1.90188	0.0180261	NA	NA
LOC_Os02g54240	0	1.07637	0.538187	0	13.5587	6.77934	0	0	0	0	0	0	0	0.591905	0.295953	0	9.43685	4.71842	0	4.11063	#DIV/0!	0.0114562	NA	NA
LOC_Os02g54420	11.7494	0	5.87472	1.56279	0.968477	1.26563	4.16709	0	2.08355	2.85832	0	1.42916	4.89008	0	2.44504	1.14419	0	0.572096	4.39532	0.161413	-4.76714	0.00645779	NA	NA
LOC_Os02g54880	0	13.4547	6.72734	0	2.90543	1.45272	0.833418	26.2505	13.542	2.85832	40.5399	21.6991	0	8.87858	4.43929	0	16.5145	8.25724	0.61529	18.0906	4.87783	0.000404031	NA	NA
LOC_Os02g56030	1161.73	521.503	841.614	1376.81	686.65	1031.73	1596.83	444.715	1020.77	908.946	409.822	659.384	629.842	247.416	438.629	772.33	540.26	656.295	1074.41	475.061	-1.17737	0.0227706	NA	NA
LOC_Os02g56050	54.3411	20.4511	37.3961	73.4509	31.9597	52.7053	12.5013	4.63245	8.56686	11.4333	0.73709	6.08518	29.3405	1.77572	15.5581	48.0561	2.35921	25.2076	38.1872	10.3192	-1.88776	0.0214316	NA	NA
LOC_Os02g56120	41.123	199.129	120.126	15.6279	25.1804	20.4041	7.50076	101.914	54.7073	13.3388	81.817	47.5779	104.648	245.641	175.144	45.7677	135.655	90.7112	38.001	131.556	1.79157	0.0197071	NA	NA
LOC_Os02g56170	459.697	177.064	318.38	379.757	240.182	309.97	314.199	118.899	216.549	493.537	79.6057	286.571	289.493	88.1939	188.843	302.067	167.504	234.785	373.125	145.241	-1.3612	0.0264027	NA	NA
LOC_Os02g56370	22.0302	155.536	88.7831	15.6279	31.9597	23.7938	2.50025	78.7516	40.6259	20.0082	107.615	63.8117	102.692	127.852	115.272	9.15354	74.3152	41.7344	28.6686	96.0049	1.74363	0.0131109	NA	NA
LOC_Os02g56420	0	2.15275	1.07637	0	4.84238	2.42119	0	1.54415	0.772074	0	2.94836	1.47418	2.93405	2.36762	2.65083	0	18.8737	9.43685	0.489008	5.45483	3.4796	0.0179806	NA	NA
LOC_Os02g56610	38.1857	105.485	71.8352	25.0046	88.1314	56.568	142.515	248.608	195.561	19.0555	128.991	74.0231	48.9008	268.725	158.813	26.3164	136.834	81.5754	49.9962	162.796	1.70317	0.0153035	NA	NA
LOC_Os02g56820	39.6543	398.797	219.225	103.144	216.939	160.041	145.848	135.885	140.867	40.0165	454.047	247.032	189.735	217.229	203.482	223.117	737.254	480.186	123.586	360.025	1.54258	0.0241471	NA	NA
LOC_Os02g56920	7265.56	4492.25	5878.9	2763	4695.18	3729.09	1864.36	6812.78	4338.57	4483.75	13019.2	8751.48	2674.87	5619.55	4147.21	1560.68	7693.39	4627.03	3435.37	7055.39	1.03826	0.00899472	NA	NA
LOC_Os02g57010	1797.66	450.463	1124.06	2542.65	1142.8	1842.73	1727.68	679.426	1203.55	2275.22	808.587	1541.9	715.908	366.389	541.148	1042.36	603.958	823.159	1683.58	675.271	-1.31799	0.00809295	NA	NA
LOC_Os02g57250	3880.25	1683.45	2781.85	3313.11	2676.87	2994.99	4247.1	1554.96	2901.03	3455.71	1615.7	2535.7	2524.26	1150.66	1837.46	3331.89	1844.9	2588.4	3458.72	1754.42	-0.97924	0.0237599	NA	NA
LOC_Os02g57670	7760.5	2505.8	5133.15	8195.25	4076.32	6135.78	6900.7	4093.54	5497.12	7401.14	2884.23	5142.69	3637.24	1946.18	2791.71	4320.47	3147.19	3733.83	6369.22	3108.88	-1.03472	0.0178802	NA	NA
LOC_Os02g57700	32.3109	138.314	85.3125	12.5023	69.7303	41.1163	21.6689	182.21	101.939	22.8666	41.277	32.0718	145.724	290.625	218.175	42.3351	226.484	134.41	46.2347	158.107	1.77385	0.0154427	NA	NA
LOC_Os02g58040	0	1.61456	0.80728	0	0.968477	0.484238	0	3.0883	1.54415	0	8.84508	4.42254	0	0.591905	0.295953	0	2.35921	1.17961	0	2.91125	#DIV/0!	0.00551279	NA	NA
LOC_Os02g58070	816.586	2313.67	1565.13	1262.73	1953.42	1608.07	935.095	2867.48	1901.29	658.366	3076.61	1867.49	1376.07	1730.73	1553.4	1553.81	2662.37	2108.09	1100.44	2434.05	1.14527	0.0124656	NA	NA
LOC_Os02g58100	186.522	17.222	101.872	37.5069	23.2434	30.3751	92.5094	0	46.2547	38.1109	3.68545	20.8982	12.7142	4.14334	8.42877	17.1629	9.43685	13.2999	64.0878	9.62184	-2.73566	0.0183162	NA	NA
LOC_Os02g58120	1304.19	491.365	897.776	2158.21	1434.31	1796.26	1462.65	747.368	1105.01	1170.96	628.738	899.848	1098.31	507.263	802.787	1886.77	725.458	1306.12	1513.51	755.751	-1.00192	0.0288893	NA	NA
LOC_Os02g58210	503.757	2278.15	1390.95	461.022	584.96	522.991	555.057	3719.85	2137.46	414.456	4056.2	2235.33	352.086	1982.29	1167.19	280.327	1018	649.164	427.784	2273.24	2.4098	1.85268e-05	NA	NA
LOC_Os02g58450	2324.92	628.602	1476.76	953.299	541.379	747.339	1390.14	693.323	1041.73	2009.4	1052.56	1530.98	1130.59	419.661	775.123	516.031	415.221	465.626	1387.4	625.125	-1.15016	0.0323054	NA	NA
LOC_Os02g58480	1794.73	488.674	1141.7	2944.29	1385.89	2165.09	1155.12	690.235	922.676	1897.92	761.414	1329.67	599.524	411.374	505.449	1323.83	959.02	1141.43	1619.24	782.768	-1.04866	0.038705	NA	NA
LOC_Os02g58650	1856.41	468.223	1162.32	2541.09	1531.16	2036.13	1841.85	1065.46	1453.66	1973.19	510.803	1242	1227.41	469.381	848.395	1938.26	474.202	1206.23	1896.37	753.205	-1.33212	0.00233199	NA	NA
LOC_Os02g58790	2354.29	399.873	1377.08	901.727	507.482	704.605	977.6	433.906	705.753	2460.06	651.587	1555.82	343.284	157.447	250.365	283.76	352.702	318.231	1220.12	417.166	-1.54833	0.0204957	NA	NA
LOC_Os03g01020	3473.43	696.952	2085.19	1705	761.223	1233.11	2413.58	741.191	1577.39	7741.28	1286.22	4513.75	1271.42	443.929	857.675	1359.3	587.444	973.372	2994	752.827	-1.99169	0.000209843	NA	NA
LOC_Os03g01320	1163.19	6618.09	3890.64	1272.11	6299.94	3786.02	1221.79	61969.8	31595.8	1722.61	19702.4	10712.5	1776.08	30099.6	15937.8	533.194	22424.3	11478.8	1281.5	24519	4.258	4.55191e-15	NA	NA
LOC_Os03g02300	66.0906	96.3355	81.213	17.1906	138.492	77.8414	10.001	298.021	154.011	34.2998	211.545	122.922	25.4284	77.5396	51.484	17.1629	120.32	68.7414	28.3622	157.042	2.46911	0.00368044	NA	NA
LOC_Os03g02340	0	0.538187	0.269093	0	3.87391	1.93695	0	0	0	0	0	0	0	2.95953	1.47976	0	2.35921	1.17961	0	1.62181	#DIV/0!	0.0306302	NA	NA
LOC_Os03g02530	433.26	1423.5	928.382	295.366	504.576	399.971	351.703	1419.07	885.388	283.926	1921.59	1102.76	951.609	2312.57	1632.09	227.694	2330.9	1279.3	423.927	1652.04	1.96236	0.000136073	NA	NA
LOC_Os03g02670	586.003	41.4404	313.722	143.776	75.5412	109.659	237.524	26.2505	131.887	1026.14	30.9578	528.547	132.032	14.2057	73.1189	106.41	53.0823	79.7461	371.98	40.2463	-3.2083	0.000165413	NA	NA
LOC_Os03g02690	2766.99	412.789	1589.89	3688.17	1905.96	2797.07	2370.24	1139.58	1754.91	2659.19	590.409	1624.8	711.017	413.15	562.084	734.571	589.803	662.187	2155.03	841.949	-1.3559	0.0065174	NA	NA
LOC_Os03g02740	69.0279	15.6074	42.3177	192.223	107.501	149.862	99.1768	3.0883	51.1325	66.6941	6.63381	36.664	60.637	13.0219	36.8294	94.968	21.2329	58.1004	97.1211	27.8475	-1.80223	0.00697428	NA	NA
LOC_Os03g02820	771.057	74.808	422.932	1192.41	664.375	928.39	700.905	355.154	528.03	1070.92	201.225	636.071	145.724	135.546	140.635	242.569	155.708	199.138	687.263	264.47	-1.37776	0.0209818	NA	NA
LOC_Os03g02920	1490.71	3114.49	2302.6	1431.51	1269.67	1350.59	1609.33	3814.05	2711.69	1342.46	3307.32	2324.89	1911.04	4109.6	3010.32	649.901	7675.7	4162.8	1405.83	3881.8	1.46531	0.00520087	NA	NA
LOC_Os03g03010	52.8725	13.4547	33.1636	295.366	117.186	206.276	158.349	3.0883	80.7189	44.7803	11.0563	27.9183	212.229	7.69477	109.962	154.466	15.3349	84.9004	153.011	27.9691	-2.45173	0.000749225	NA	NA
LOC_Os03g03200	101.339	365.967	233.653	28.1301	47.4554	37.7928	18.3352	108.09	63.2128	184.838	157	170.919	67.4831	220.781	144.132	50.3445	346.804	198.574	75.0783	207.683	1.46792	0.0392143	NA	NA
LOC_Os03g03280	168.898	236.802	202.85	26.5674	71.6673	49.1173	35.0036	379.861	207.432	167.688	436.357	302.023	38.1426	284.706	161.424	18.3071	455.328	236.818	75.7678	310.787	2.03627	0.00186516	NA	NA
LOC_Os03g03320	246.738	82.8808	164.809	187.534	65.8564	126.695	212.522	30.883	121.702	115.286	16.9531	66.1193	56.7249	30.7791	43.752	86.9586	43.6454	65.302	150.961	45.1663	-1.74085	0.0324192	NA	NA
LOC_Os03g03334	0	66.197	33.0985	1.56279	0.968477	1.26563	1.66684	123.532	62.5994	0	63.3897	31.6949	44.9887	55.6391	50.3139	3.43258	16.5145	9.97353	8.60849	54.3734	2.65907	0.00607968	NA	NA
LOC_Os03g03340	0	3.22912	1.61456	0	0	0	0	3.0883	1.54415	0	1.47418	0.73709	0	0.591905	0.295953	0	0	0	0	1.39725	#DIV/0!	0.0300328	NA	NA
LOC_Os03g03590	1531.83	645.824	1088.83	1137.71	803.836	970.772	1070.11	426.185	748.147	1452.03	336.85	894.438	792.193	346.265	569.229	483.993	477.74	480.867	1077.98	506.117	-1.09078	0.0394729	NA	NA
LOC_Os03g03640	832.741	479.525	656.133	1631.55	829.016	1230.28	995.101	600.674	797.888	786.038	524.071	655.054	746.226	232.619	489.422	1327.26	449.43	888.346	1053.15	519.222	-1.02029	0.0394931	NA	NA
LOC_Os03g03680	4.40604	14.531	9.46854	3.12557	44.5499	23.8378	1.66684	33.9713	17.8191	5.71664	22.1127	13.9147	0	116.605	58.3027	0	15.3349	7.66744	2.48585	41.1842	4.05028	0.00152518	NA	NA
LOC_Os03g03990	1164.66	159.303	661.983	632.928	389.328	511.128	550.056	336.624	443.34	977.545	297.047	637.296	219.076	81.6829	150.379	256.299	150.99	203.644	633.428	235.829	-1.42544	0.0202173	NA	NA
LOC_Os03g04310	223.239	489.212	356.226	134.4	383.517	258.958	247.525	535.82	391.672	175.31	703.184	439.247	212.229	766.517	489.373	125.861	1126.52	626.193	186.427	667.462	1.84007	0.00232247	NA	NA
LOC_Os03g04620	2.93736	17.222	10.0797	0	0.968477	0.484238	0	6.1766	3.0883	0	3.68545	1.84272	2.93405	5.91905	4.42655	1.14419	5.89803	3.52111	1.16927	6.64493	2.50665	0.0399407	NA	NA
LOC_Os03g04780	0	9.68737	4.84368	0	0	0	0	0	0	5.71664	11.7934	8.75504	0	7.10286	3.55143	0	9.43685	4.71842	0.952773	6.33675	2.73354	0.0247337	NA	NA
LOC_Os03g04950	80.7774	17.222	48.9997	315.683	169.483	242.583	122.512	33.9713	78.2419	21.9138	21.3756	21.6447	198.537	39.0657	118.801	116.708	11.7961	64.2518	142.689	48.819	-1.54735	0.0336843	NA	NA
LOC_Os03g05060	2.93736	44.1313	23.5343	7.81393	0	3.90696	0	4.63245	2.31622	0.952773	3.68545	2.31911	0	9.47048	4.73524	0	3.53882	1.76941	1.95068	10.9098	2.48357	0.045795	NA	NA
LOC_Os03g05140	4.40604	11.3019	7.85398	0	2.90543	1.45272	5.83393	146.694	76.264	3.81109	95.8217	49.8164	25.4284	56.8229	41.1257	0	68.4172	34.2086	6.57991	63.6605	3.27426	0.00218376	NA	NA
LOC_Os03g05210	0	6.45824	3.22912	0	2.90543	1.45272	0.833418	10.809	5.82123	7.62219	8.10799	7.86509	1.95603	5.32715	3.64159	0	9.43685	4.71842	1.73527	7.17412	2.04764	0.0393317	NA	NA
LOC_Os03g05334	290.798	29.6003	160.199	229.729	86.1944	157.962	412.542	3.0883	207.815	403.023	2.21127	202.617	62.593	8.87858	35.7358	59.498	49.5435	54.5207	243.031	29.9194	-3.02199	0.000216946	NA	NA
LOC_Os03g05620	941.423	3392.19	2166.81	304.743	1135.05	719.899	431.711	2518.51	1475.11	1230.03	3606.58	2418.31	2153.59	2855.94	2504.77	290.625	4882.39	2586.51	892.021	3065.11	1.78079	3.44838e-05	NA	NA
LOC_Os03g05806	1324.75	433.779	879.264	1603.42	1019.81	1311.61	1525.99	719.573	1122.78	1316.73	462.155	889.444	945.741	412.558	679.15	1384.47	457.687	921.08	1350.18	584.26	-1.20847	0.010416	NA	NA
LOC_Os03g05880	48.4664	3.76731	26.1169	6.25114	6.77934	6.51524	5.83393	0	2.91696	7.62219	0	3.81109	1.95603	0.591905	1.27397	1.14419	0	0.572096	11.879	1.85643	-2.67781	0.0391192	NA	NA
LOC_Os03g06230	2241.2	784.138	1512.67	1095.51	711.83	903.672	1128.45	467.877	798.163	1769.3	539.55	1154.42	784.369	304.239	544.304	763.176	580.366	671.771	1297	564.667	-1.19971	0.0221703	NA	NA
LOC_Os03g06350	804.836	368.658	586.747	968.927	405.792	687.359	866.755	131.253	499.004	751.738	167.319	459.529	262.108	130.811	196.46	394.746	572.109	483.428	674.852	295.99	-1.18902	0.0249174	NA	NA
LOC_Os03g06360	249.675	41.9786	145.827	254.734	93.9423	174.338	278.362	7.72074	143.041	362.054	19.9014	190.978	71.3952	24.86	48.1276	241.425	68.4172	154.921	242.941	42.8034	-2.50481	0.000821419	NA	NA
LOC_Os03g06620	2313.17	1723.81	2018.49	2175.4	1948.58	2061.99	1839.35	577.512	1208.43	7119.12	1196.3	4157.71	2289.53	509.63	1399.58	1908.51	1223.25	1565.88	2940.85	1196.51	-1.2974	0.00758308	NA	NA
LOC_Os03g06700	67.5592	38.2113	52.8853	4.68836	169.483	87.0859	9.1676	86.4723	47.82	0.952773	179.85	90.4013	18.5823	62.15	40.3662	12.5861	155.708	84.1471	18.9227	115.312	2.60736	0.00183118	NA	NA
LOC_Os03g06705	105.745	305.69	205.718	34.3813	620.794	327.587	95.0097	582.144	338.577	9.52773	626.526	318.027	137.9	565.861	351.881	51.4887	1459.17	755.331	72.3421	693.365	3.26071	2.87488e-07	NA	NA
LOC_Os03g07100	668.249	3351.83	2010.04	1545.59	3273.45	2409.52	2487.75	1911.66	2199.71	282.974	3383.98	1833.48	2393.2	2853.57	2623.39	3861.65	4199.4	4030.52	1873.24	3162.31	0.755447	0.0230102	NA	NA
LOC_Os03g07990	1480.43	2784.58	2132.5	778.267	915.211	846.739	661.734	1615.18	1138.46	1928.41	3756.95	2842.68	978.994	1757.96	1368.48	923.363	4888.29	2905.83	1125.2	2619.69	1.21922	0.018759	NA	NA
LOC_Os03g08470	3413.21	6770.39	5091.8	520.408	2919.96	1720.18	1616.83	2680.64	2148.74	1432.97	3235.09	2334.03	2031.34	1249.51	1640.43	617.864	5467.47	3042.67	1605.44	3720.51	1.21253	0.00651225	NA	NA
LOC_Os03g08570	4190.14	1294.34	2742.24	2934.91	2039.61	2487.26	2629.43	2121.66	2375.55	4096.92	1875.89	2986.41	1320.32	730.411	1025.37	1850.16	1029.8	1439.98	2836.98	1515.29	-0.904767	0.0496518	NA	NA
LOC_Os03g08624	5.87472	3.22912	4.55192	0	0	0	1.66684	0	0.833418	11.4333	1.47418	6.45373	42.0547	5.32715	23.6909	50.3445	1.17961	25.762	18.5623	1.86834	-3.31255	0.0396041	NA	NA
LOC_Os03g08670	0	2.15275	1.07637	0	1.93695	0.968477	0	1.54415	0.772074	0	0.73709	0.368545	0	1.77572	0.887858	0	2.35921	1.17961	0	1.75098	#DIV/0!	0.0114027	NA	NA
LOC_Os03g08930	88.1208	381.036	234.579	37.5069	249.867	143.687	41.6709	412.288	226.979	220.091	659.695	439.893	133.988	245.641	189.814	45.7677	653.502	349.635	94.5242	433.671	2.19785	0.000407115	NA	NA
LOC_Os03g08980	1.46868	18.2984	9.88352	0	1.93695	0.968477	0	3.0883	1.54415	0	20.6385	10.3193	1.95603	13.6138	7.78493	1.14419	12.9757	7.05993	0.761484	11.7586	3.94876	0.00492915	NA	NA
LOC_Os03g08999	93.9955	252.41	173.203	7.81393	30.9913	19.4026	1.66684	26.2505	13.9587	33.3471	80.3428	56.8449	9.78016	21.9005	15.8403	11.4419	127.397	69.4197	26.3409	89.882	1.77073	0.0222927	NA	NA
LOC_Os03g09070	79.3087	302.461	190.885	12.5023	128.807	70.6548	86.6755	149.782	118.229	82.8913	305.155	194.023	166.263	474.116	320.189	254.011	881.166	567.588	113.609	373.581	1.71735	0.00554872	NA	NA
LOC_Os03g10800	320.172	1120.51	720.339	618.863	1244.49	931.678	1125.95	2222.03	1673.99	404.929	2139.03	1271.98	1087.55	3257.25	2172.4	1675.1	1434.4	1554.75	872.094	1902.95	1.12568	0.00974489	NA	NA
LOC_Os03g11560	741.683	231.42	486.552	928.295	417.414	672.854	500.051	203.828	351.939	653.602	179.85	416.726	288.515	88.1939	188.354	346.69	219.407	283.048	576.473	223.352	-1.36793	0.0161374	NA	NA
LOC_Os03g11960	2783.15	4362.54	3572.85	1284.61	2682.68	1983.65	1784.35	3460.44	2622.39	2911.67	5046.12	3978.9	1223.5	3244.82	2234.16	1361.59	6003.02	3682.3	1891.48	4133.27	1.12777	0.00898914	NA	NA
LOC_Os03g12020	6910.14	2326.04	4618.09	4875.89	2938.36	3907.12	3812.89	2903	3357.94	7799.4	3800.43	5799.92	3451.42	1842.01	2646.71	3700.32	2566.82	3133.57	5091.68	2729.44	-0.899533	0.047174	NA	NA
LOC_Os03g12110	769.588	259.944	514.766	546.975	264.394	405.685	399.207	146.694	272.951	426.842	146.681	286.762	308.075	153.303	230.689	588.115	204.072	396.093	506.467	195.848	-1.37073	0.0219639	NA	NA
LOC_Os03g12260	418.574	86.6481	252.611	220.353	106.532	163.443	256.693	97.2814	176.987	375.393	20.6385	198.016	49.8788	13.0219	31.4504	33.1816	42.4658	37.8237	225.679	61.098	-1.88507	0.0284817	NA	NA
LOC_Os03g12470	202.678	316.992	259.835	150.027	152.051	151.039	105.011	370.596	237.803	161.019	532.916	346.967	161.373	583.618	372.496	108.698	411.683	260.19	148.134	394.643	1.41364	0.0365118	NA	NA
LOC_Os03g12810	1392.31	1003.72	1198.01	1148.65	851.291	999.969	1399.31	798.325	1098.82	1370.09	882.296	1126.19	1549.18	346.265	947.721	1985.17	772.642	1378.91	1474.12	775.756	-0.926176	0.0486422	NA	NA
LOC_Os03g12820	93.9955	839.572	466.784	79.7021	103.627	91.6645	90.8426	228.534	159.688	73.3635	199.014	136.189	286.559	574.148	430.353	152.178	700.686	426.432	129.44	440.93	1.76827	0.0147146	NA	NA
LOC_Os03g12890	762.245	925.682	843.963	160.967	623.699	392.333	109.178	1213.7	661.439	308.699	1093.84	701.27	182.889	430.907	306.898	73.2283	1087.6	580.413	266.201	895.904	1.75083	0.000329711	NA	NA
LOC_Os03g12900	537.537	1613.48	1075.51	698.565	1541.82	1120.19	602.561	2345.56	1474.06	345.857	5039.48	2692.67	458.689	2265.81	1362.25	360.421	2177.55	1268.99	500.605	2497.29	2.31862	7.92257e-06	NA	NA
LOC_Os03g12910	4259.17	1334.17	2796.67	2106.63	1874	1990.32	1837.69	543.54	1190.61	3090.8	644.954	1867.87	1297.83	197.104	747.466	1327.26	514.308	920.786	2319.9	851.346	-1.44624	0.00061149	NA	NA
LOC_Os03g12940	591.878	157.689	374.783	512.594	215.002	363.798	451.713	228.534	340.123	588.814	127.517	358.165	283.625	89.9696	186.797	311.22	80.2132	195.717	456.64	149.821	-1.60782	0.00739693	NA	NA
LOC_Os03g12950	38.1857	257.253	147.72	104.707	216.939	160.823	245.858	338.169	292.014	18.1027	266.089	142.096	263.086	617.357	440.222	490.858	370.396	430.627	193.466	344.367	0.831865	0.0358608	NA	NA
LOC_Os03g13140	2.93736	275.014	138.975	1.56279	4.84238	3.20258	1.66684	4.63245	3.14964	1.90555	68.5493	35.2274	14.6702	20.1248	17.3975	1.14419	90.8297	45.9869	3.98116	77.332	4.27981	0.00377166	NA	NA
LOC_Os03g13160	0	30.6767	15.3383	0	0	0	0	0	0	0	2.94836	1.47418	0	0.591905	0.295953	0	28.3105	14.1553	0	10.4212	#DIV/0!	0.00188079	NA	NA
LOC_Os03g13540	2608.37	2465.97	2537.17	1992.55	1915.65	1954.1	2389.41	7767.07	5078.24	2230.44	3739.99	2985.22	1990.26	4869.01	3429.64	778.051	3955.22	2366.64	1998.18	4118.82	1.04354	0.0304281	NA	NA
LOC_Os03g13570	787.212	117.325	452.268	1072.07	444.531	758.301	622.563	254.785	438.674	670.752	176.902	423.827	181.911	143.241	162.576	264.308	166.324	215.316	599.803	217.185	-1.46557	0.020468	NA	NA
LOC_Os03g13984	26.4362	5.38187	15.909	3.12557	3.87391	3.49974	23.3357	3.0883	13.212	17.1499	1.47418	9.31205	12.7142	1.18381	6.94901	21.7397	1.17961	11.4596	17.4169	2.69695	-2.69109	0.0359729	NA	NA
LOC_Os03g14180	0	19.3747	9.68737	1.56279	0.968477	1.26563	0	13.8973	6.94867	0	6.63381	3.3169	0	5.91905	2.95953	1.14419	5.89803	3.52111	0.451163	8.78191	4.28281	0.0077643	NA	NA
LOC_Os03g14210	64.6219	15.6074	40.1147	275.05	216.939	245.995	140.848	16.9856	78.9167	110.522	41.277	75.8994	82.1533	21.9005	52.0269	156.754	23.5921	90.1732	138.325	56.0503	-1.30327	0.020734	NA	NA
LOC_Os03g14270	19.0928	19.9129	19.5029	4.68836	16.4641	10.5762	5.83393	61.766	33.7999	28.5832	56.0188	42.301	0.978016	28.4114	14.6947	1.14419	30.6698	15.907	10.0534	35.5405	1.82178	0.0355264	NA	NA
LOC_Os03g14280	2574.59	891.238	1732.92	5152.5	2828.92	3990.71	4209.6	2831.97	3520.78	3219.42	1658.45	2438.94	2180	1076.68	1628.34	2944.01	1074.62	2009.31	3380.02	1726.98	-0.968781	0.0171364	NA	NA
LOC_Os03g14334	377.451	127.55	252.5	618.863	298.291	458.577	488.383	157.503	322.943	529.742	329.479	429.611	484.118	240.313	362.216	340.969	147.451	244.21	473.254	216.765	-1.12649	0.0446025	NA	NA
LOC_Os03g14610	2440.94	1750.72	2095.83	3778.82	1919.52	2849.17	2970.3	1256.94	2113.62	5203.09	2362.37	3782.73	1905.17	831.627	1368.4	2786.11	1310.54	2048.33	3180.74	1571.95	-1.0168	0.0227563	NA	NA
LOC_Os03g14630	10.2808	0	5.14038	51.5719	2.90543	27.2387	7.50076	0	3.75038	3.81109	0	1.90555	50.8568	0.591905	25.7244	30.8932	1.17961	16.0364	25.8191	0.77949	-5.04976	0.000143132	NA	NA
LOC_Os03g14840	91.0581	329.909	210.483	140.651	230.497	185.574	148.348	208.46	178.404	36.2054	194.592	115.399	446.953	628.011	537.482	263.164	802.132	532.648	187.73	398.934	1.08749	0.0465034	NA	NA
LOC_Os03g15020	2960.86	847.106	1903.98	2923.97	1887.56	2405.77	1841.85	591.409	1216.63	6652.26	882.296	3767.28	2002.98	950.6	1476.79	1757.48	586.264	1171.87	3023.23	957.539	-1.65869	0.000679725	NA	NA
LOC_Os03g15080	79.3087	119.478	99.3931	10.9395	64.8879	37.9137	18.3352	172.945	95.6399	91.4662	369.282	230.374	38.1426	134.362	86.2525	11.4419	194.635	103.038	41.6057	175.932	2.08016	0.00453512	NA	NA
LOC_Os03g15360	5.87472	1.07637	3.47555	3.12557	0.968477	2.04702	7.50076	0	3.75038	9.52773	0	4.76387	1.95603	0	0.978016	2.28838	0	1.14419	5.04553	0.340808	-3.88797	0.0110726	NA	NA
LOC_Os03g15620	4.40604	0	2.20302	0	0	0	0	0	0	4.76387	0	2.38193	0	0	0	0	0	0	1.52832	0	#NUM!	0.0361356	NA	NA
LOC_Os03g16150	1120.6	4371.15	2745.88	1137.71	1507.92	1322.81	1716.01	4476.49	3096.25	1212.88	5351.27	3282.08	2191.73	4335.11	3263.42	995.447	5127.75	3061.6	1395.73	4194.95	1.58763	0.000729698	NA	NA
LOC_Os03g16260	1.46868	279.857	140.663	0	2.90543	1.45272	0.833418	46.3245	23.5789	1.90555	143.732	72.819	0.978016	307.791	154.384	0	86.1112	43.0556	0.864277	144.454	7.3849	3.36426e-09	NA	NA
LOC_Os03g16290	290.798	25.2948	158.047	239.106	105.564	172.335	262.527	29.3388	145.933	381.109	49.385	215.247	21.5163	9.47048	15.4934	21.7397	22.4125	22.0761	202.799	40.2443	-2.3332	0.0145613	NA	NA
LOC_Os03g16334	756.37	296.541	526.455	1656.55	854.197	1255.37	480.882	162.136	321.509	533.553	113.512	323.532	527.151	105.359	316.255	422.207	340.906	381.557	729.453	312.108	-1.22477	0.00929907	NA	NA
LOC_Os03g16390	46.9977	244.875	145.936	4.68836	45.5184	25.1034	30.8365	148.238	89.5374	124.813	233.657	179.235	230.812	262.806	246.809	28.6048	296.081	162.343	77.7921	205.196	1.39931	0.00969686	NA	NA
LOC_Os03g16950	17.6242	35.5203	26.5722	10.9395	89.0999	50.0197	1.66684	46.3245	23.9957	35.2526	74.4461	54.8493	14.6702	623.868	319.269	1.14419	33.029	17.0866	13.5496	150.381	3.4723	0.000840343	NA	NA
LOC_Os03g16960	0	14.531	7.26552	0	31.9597	15.9799	0	37.0596	18.5298	3.81109	43.4883	23.6497	9.78016	102.991	56.3858	1.14419	10.6165	5.88032	2.45591	40.1078	4.02955	0.000237706	NA	NA
LOC_Os03g17250	33.7796	233.035	133.407	25.0046	66.8249	45.9147	60.8395	299.565	180.202	40.9692	642.742	341.856	111.494	340.345	225.92	18.3071	421.119	219.713	48.399	333.939	2.78653	0.000238508	NA	NA
LOC_Os03g17470	972.266	252.948	612.607	179.72	109.438	144.579	235.857	230.078	232.968	1079.49	191.643	635.568	164.307	34.9224	99.6145	179.638	125.038	152.338	468.547	157.345	-1.57426	0.0362945	NA	NA
LOC_Os03g17580	4458.91	1663	3060.95	3274.04	1686.12	2480.08	2962.8	2072.25	2517.52	3983.54	1928.96	2956.25	2136.96	773.62	1455.29	1820.41	1620.78	1720.59	3106.11	1624.12	-0.93545	0.0392212	NA	NA
LOC_Os03g17680	165.961	404.717	285.339	6.25114	42.613	24.4321	46.6714	97.2814	71.9764	58.1192	403.925	231.022	94.8675	156.263	125.565	62.9306	179.3	121.115	72.4668	214.017	1.56233	0.0280549	NA	NA
LOC_Os03g18120	143.931	12.9165	78.4235	151.59	18.4011	84.9956	229.19	1.54415	115.367	56.2136	9.58217	32.8979	58.6809	0.591905	29.6364	32.0374	15.3349	23.6861	111.94	9.72844	-3.52438	0.000343584	NA	NA
LOC_Os03g18220	2990.23	23038.7	13014.5	1803.45	2659.44	2231.45	3327.01	6801.98	5064.49	4083.59	22768	13425.8	3061.19	13364.6	8212.91	3247.22	17209.3	10228.2	3085.45	14307	2.21317	1.49024e-05	NA	NA
LOC_Os03g18370	4369.32	1246.44	2807.88	3300.6	2109.34	2704.97	2115.22	642.366	1378.79	3742.49	722.348	2232.42	618.106	512.59	565.348	712.832	1642.01	1177.42	2476.43	1145.85	-1.11184	0.0485811	NA	NA
LOC_Os03g18600	890.02	1290.57	1090.3	203.162	994.626	598.894	434.211	2977.12	1705.66	869.882	1480.81	1175.35	987.796	1076.08	1031.94	432.505	2123.29	1277.9	636.263	1657.08	1.38095	0.00436264	NA	NA
LOC_Os03g18710	324.578	60.2769	192.428	520.408	156.893	338.65	156.683	77.2074	116.945	357.29	58.9672	208.129	133.988	54.4553	94.2217	163.619	46.0046	104.812	276.094	75.6341	-1.86805	0.0105236	NA	NA
LOC_Os03g18820	1111.79	2918.59	2015.19	1348.68	1598.96	1473.82	1280.13	2518.51	1899.32	1297.68	2931.41	2114.54	1840.63	3889.41	2865.02	1361.59	4325.62	2843.6	1373.42	3030.41	1.14175	0.0164168	NA	NA
LOC_Os03g18910	214.427	2306.67	1260.55	478.212	510.387	494.3	669.235	855.458	762.347	1696.89	3101.67	2399.28	1517.88	2308.43	1913.16	814.665	3015.07	1914.87	898.551	2016.28	1.16602	0.0203918	NA	NA
LOC_Os03g19260	49.9351	128.089	89.0118	25.0046	29.0543	27.0294	15.0015	214.637	114.819	43.8276	440.78	242.304	44.9887	159.222	102.106	11.4419	244.178	127.81	31.6999	202.66	2.67651	0.00339042	NA	NA
LOC_Os03g19310	459.697	1032.78	746.239	95.3299	371.895	233.613	150.015	509.569	329.792	426.842	504.169	465.506	181.911	203.023	192.467	38.9025	741.972	390.437	225.45	560.568	1.31409	0.0148336	NA	NA
LOC_Os03g19390	139.525	67.2734	103.399	242.232	45.5184	143.875	240.858	7.72074	124.289	326.801	19.9014	173.351	333.503	15.3895	174.446	298.634	44.825	171.73	263.592	33.4381	-2.97874	6.63956e-05	NA	NA
LOC_Os03g19610	0	5.38187	2.69093	0	0	0	0	3.0883	1.54415	2.85832	4.42254	3.64043	0	16.5733	8.28667	1.14419	81.3928	41.2685	0.667085	18.4765	4.79167	0.00648666	NA	NA
LOC_Os03g19670	450.885	135.085	292.985	1048.63	754.443	901.536	283.362	129.709	206.535	297.265	199.014	248.14	411.745	78.1315	244.938	533.194	154.528	343.861	504.18	241.818	-1.06001	0.0239052	NA	NA
LOC_Os03g19709	23.4989	9.68737	16.5931	20.3162	10.6532	15.4847	21.6689	1.54415	11.6065	35.2526	0.73709	17.9948	3.91206	0	1.95603	4.57677	1.17961	2.87819	18.2042	3.96691	-2.19819	0.0308503	NA	NA
LOC_Os03g19840	0	10.7637	5.38187	1.56279	0	0.781393	0.833418	15.4415	8.13745	1.90555	5.89672	3.90113	0.978016	112.462	56.72	1.14419	11.7961	6.47013	1.07066	26.06	4.60527	0.0224359	NA	NA
LOC_Os03g20070	11.7494	128.627	70.1881	4.68836	33.8967	19.2925	9.1676	111.179	60.1732	30.4887	44.2254	37.3571	69.4391	114.83	92.1344	36.6142	204.072	120.343	27.0246	106.138	1.9736	0.0150771	NA	NA
LOC_Os03g20100	10815.4	2369.1	6592.23	6360.54	4221.59	5291.06	5807.26	4065.74	4936.5	14320.2	5542.18	9931.18	3092.49	1978.15	2535.32	3926.87	3013.89	3470.38	7387.11	3531.78	-1.06462	0.0299356	NA	NA
LOC_Os03g20260	0	1.07637	0.538187	0	0	0	0	0	0	0	1.47418	0.73709	0	1.77572	0.887858	0	3.53882	1.76941	0	1.31085	#DIV/0!	0.0324674	NA	NA
LOC_Os03g20370	3285.44	11715.3	7500.34	3220.9	6175.98	4698.44	6421.49	9953.58	8187.54	4151.23	7630.35	5890.79	12883.4	23067.7	17975.6	9044.84	17455.8	13250.3	6501.22	12666.5	0.962231	0.0176092	NA	NA
LOC_Os03g20380	4552.91	1634.47	3093.69	5404.11	4389.14	4896.62	4808.82	1771.14	3289.98	4003.55	2082.28	3042.92	4423.57	2525.07	3474.32	3180.85	2772.07	2976.46	4395.64	2529.03	-0.797489	0.049604	NA	NA
LOC_Os03g20420	790.149	1277.12	1033.63	403.199	776.718	589.959	476.715	1730.99	1103.85	840.346	2304.88	1572.61	415.657	1220.51	818.083	367.286	2072.57	1219.93	548.892	1563.8	1.51046	0.00278053	NA	NA
LOC_Os03g20550	304.017	1300.26	802.138	198.474	552.032	375.253	81.675	1664.59	873.134	236.288	1105.63	670.961	672.875	1334.75	1003.81	133.87	1058.11	595.989	271.2	1169.23	2.10813	3.08055e-05	NA	NA
LOC_Os03g20870	83.7147	180.293	132.004	26.5674	56.1717	41.3695	28.3362	290.3	159.318	181.98	437.094	309.537	16.6263	71.6205	44.1234	21.7397	188.737	105.238	59.8273	204.036	1.76995	0.0109591	NA	NA
LOC_Os03g20910	1.46868	95.2591	48.3639	0	2.90543	1.45272	3.33367	18.5298	10.9317	0.952773	10.3193	5.63601	20.5383	120.749	70.6435	5.72096	14.1553	9.93812	5.33574	43.6529	3.03232	0.00953276	NA	NA
LOC_Os03g21060	142.462	328.832	235.647	51.5719	65.8564	58.7142	16.6684	95.7372	56.2028	64.7886	61.1784	62.9835	38.1426	227.883	133.013	32.0374	327.931	179.984	57.6118	184.57	1.67973	0.0419832	NA	NA
LOC_Os03g21210	572.785	2426.69	1499.74	693.877	911.337	802.607	936.762	995.976	966.369	1584.46	1982.77	1783.62	2150.66	3758.01	2954.33	1246.03	6339.2	3792.61	1197.43	2735.66	1.19195	0.0360407	NA	NA
LOC_Os03g21400	274.643	83.9572	179.3	203.162	217.907	210.535	234.191	33.9713	134.081	105.758	36.8545	71.3062	154.526	10.0624	82.2944	181.927	71.956	126.941	192.368	75.7848	-1.34389	0.0201431	NA	NA
LOC_Os03g21419	196.803	25.833	111.318	56.2603	43.5815	49.9209	90.8426	10.809	50.8258	71.458	10.3193	40.8886	19.5603	2.36762	10.964	25.1722	17.6941	21.4332	76.6827	18.4341	-2.05653	0.0303774	NA	NA
LOC_Os03g21790	0	6.45824	3.22912	7.81393	15.4956	11.6548	2.50025	74.1191	38.3097	0	5.89672	2.94836	0.978016	55.6391	28.3085	2.28838	37.7474	20.0179	2.26343	32.5594	3.84649	0.00141366	NA	NA
LOC_Os03g21800	471.446	2313.67	1392.56	1050.19	1152.49	1101.34	1111.78	1067.01	1089.39	644.075	2464.09	1554.08	1982.44	2455.81	2219.13	2131.63	4527.33	3329.48	1231.93	2330.07	0.919454	0.0494976	NA	NA
LOC_Os03g22080	0	0	0	0	0	0	0	3.0883	1.54415	0	3.68545	1.84272	0	0	0	0	1.17961	0.589803	0	1.32556	#DIV/0!	0.0397152	NA	NA
LOC_Os03g22120	1031.01	1272.27	1151.64	218.79	426.13	322.46	405.041	789.06	597.051	1332.93	992.86	1162.89	222.988	767.701	495.344	231.127	1598.37	914.747	573.648	974.399	0.764346	0.0498063	NA	NA
LOC_Os03g22170	36.717	367.582	202.149	7.81393	125.902	66.858	3.33367	60.2218	31.7777	15.2444	122.357	68.8006	1.95603	314.894	158.425	2.28838	297.261	149.775	11.2256	214.703	4.25748	6.00991e-07	NA	NA
LOC_Os03g22440	0	11.8401	5.92006	0	0	0	0	1.54415	0.772074	0	0	0	0	0.591905	0.295953	0	0	0	0	2.32936	#DIV/0!	0.0420903	NA	NA
LOC_Os03g22634	198.272	0	99.1358	214.102	0	107.051	20.002	0	10.001	203.893	0	101.947	9.78016	0	4.89008	27.4606	1.17961	14.3201	112.252	0.196601	-9.15725	6.92569e-10	NA	NA
LOC_Os03g22680	208.552	693.723	451.138	196.911	276.984	236.948	131.68	768.986	450.333	347.762	817.433	582.597	266.998	520.877	393.937	187.648	607.497	397.572	223.259	614.25	1.46011	0.0132844	NA	NA
LOC_Os03g22820	13.2181	231.42	122.319	12.5023	18.4011	15.4517	2.50025	16.9856	9.74295	20.961	145.944	83.4524	62.593	108.319	85.4558	36.6142	175.761	106.188	24.7315	116.138	2.23143	0.0168901	NA	NA
LOC_Os03g24020	8834.11	1901.41	5367.76	5655.72	3378.05	4516.88	5958.94	3973.1	4966.02	10719.7	4487.4	7603.53	2358.97	1850.3	2104.63	3601.92	1982.92	2792.42	6188.22	2928.86	-1.07918	0.0224996	NA	NA
LOC_Os03g24070	1.46868	0.538187	1.00343	1.56279	0.968477	1.26563	10.001	1.54415	5.77258	22.8666	0	11.4333	12.7142	0.591905	6.65306	9.15354	0	4.57677	9.6278	0.60712	-3.98715	0.0181995	NA	NA
LOC_Os03g24100	2.93736	131.318	67.1275	7.81393	2.90543	5.35968	3.33367	16.9856	10.1597	10.4805	10.3193	10.3999	28.3625	246.233	137.298	4.57677	106.165	55.3707	9.58412	85.6542	3.15981	0.0323142	NA	NA
LOC_Os03g24470	0	0	0	0	0	0	0	4.63245	2.31622	0	0	0	0	2.95953	1.47976	0	1.17961	0.589803	0	1.46193	#DIV/0!	0.0365267	NA	NA
LOC_Os03g24730	412.699	29.6003	221.15	60.9486	32.9282	46.9384	277.528	32.4271	154.978	232.477	47.1737	139.825	49.8788	11.8381	30.8585	78.9493	30.6698	54.8095	185.413	30.7729	-2.59101	0.0063437	NA	NA
LOC_Os03g24910	321.641	53.8187	187.73	276.613	174.326	225.469	215.022	100.37	157.696	318.226	65.601	191.914	169.197	52.0877	110.642	137.303	41.2862	89.2946	239.667	81.2482	-1.56062	0.0209421	NA	NA
LOC_Os03g24950	597.752	1348.16	972.955	335.999	694.398	515.198	390.04	1312.53	851.283	782.227	1668.03	1225.13	733.512	1530.07	1131.79	601.845	1363.62	982.735	573.562	1319.47	1.20194	0.0144729	NA	NA
LOC_Os03g25320	0	0	0	0	0	0	0.833418	21.6181	11.2258	0	5.89672	2.94836	0	9.47048	4.73524	0	2.35921	1.17961	0.138903	6.55742	5.56098	0.00588049	NA	NA
LOC_Os03g25340	0	36.0585	18.0293	1.56279	0	0.781393	0	120.444	60.2218	0	19.9014	9.95071	0.978016	149.752	75.365	0	18.8737	9.43685	0.423467	57.5049	7.08529	1.96971e-05	NA	NA
LOC_Os03g25360	0	6.99643	3.49822	0	0	0	0	1.54415	0.772074	0	0	0	0	7.10286	3.55143	0	2.35921	1.17961	0	3.00044	#DIV/0!	0.00938603	NA	NA
LOC_Os03g25960	9415.7	1962.23	5688.97	9622.07	5460.27	7541.17	7146.56	4451.78	5799.17	8271.98	3443.68	5857.83	4336.52	1937.31	3136.91	5700.37	1603.08	3651.73	7415.53	3143.06	-1.23838	0.00213025	NA	NA
LOC_Os03g25990	82.246	26.9093	54.5777	50.0091	40.676	45.3426	61.673	1.54415	31.6086	50.497	2.94836	26.7227	26.4064	0	13.2032	6.86515	15.3349	11.1	46.2828	14.5688	-1.66759	0.0364341	NA	NA
LOC_Os03g26910	295.205	918.685	606.945	168.781	609.172	388.976	233.357	514.202	373.779	366.818	448.888	407.853	359.91	939.945	649.928	173.917	2379.27	1276.59	266.331	968.36	1.86232	0.00324089	NA	NA
LOC_Os03g27120	812.18	1274.43	1043.3	840.779	694.398	767.588	1643.5	392.214	1017.86	895.607	209.333	552.47	2336.48	543.369	1439.92	1431.38	1131.24	1281.31	1326.66	707.497	-0.906997	0.0442354	NA	NA
LOC_Os03g27250	1730.1	2432.61	2081.35	1004.87	1281.29	1143.08	970.932	2289.97	1630.45	1652.11	2665.32	2158.71	860.654	1698.18	1279.41	838.693	2932.5	1885.6	1176.23	2216.64	0.914211	0.0476692	NA	NA
LOC_Os03g27540	1.46868	0	0.73434	1.56279	0	0.781393	2.50025	0	1.25013	0.952773	0	0.476387	0	0	0	14.8745	2.35921	8.61686	3.55983	0.393202	-3.17847	0.033266	NA	NA
LOC_Os03g28330	75736.9	38992.2	57364.5	115304	67340.1	91322	106750	41843.3	74296.7	92759.1	36948.8	64854	78611.9	44793.6	61702.8	91443.8	43238.5	67341.2	93434.3	45526.1	-1.03726	0.0404384	NA	NA
LOC_Os03g29190	577.191	772.837	675.014	181.283	798.993	490.138	205.021	5768.94	2986.98	457.331	1593.59	1025.46	1159.93	1625.37	1392.65	141.88	1355.37	748.624	453.772	1985.85	2.12972	0.000101381	NA	NA
LOC_Os03g29410	38.1857	482.216	260.201	9.37671	50.3608	29.8688	7.50076	185.298	96.3993	100.994	257.244	179.119	56.7249	532.123	294.424	8.00935	465.944	236.977	36.7986	328.864	3.15977	1.13547e-05	NA	NA
LOC_Os03g29480	1.46868	0	0.73434	1.56279	0	0.781393	0.833418	0	0.416709	0.952773	0	0.476387	0.978016	0	0.489008	0	0	0	0.965945	0	#NUM!	0.0232918	NA	NA
LOC_Os03g29540	787.212	2434.22	1610.72	492.277	1157.33	824.804	507.552	3214.92	1861.23	1007.08	6397.2	3702.14	637.666	1227.61	932.639	416.486	2773.25	1594.87	641.379	2867.42	2.16051	4.27833e-05	NA	NA
LOC_Os03g29760	3452.86	1312.1	2382.48	3145.89	1300.66	2223.28	2015.21	353.61	1184.41	2546.76	493.85	1520.31	1780.97	635.114	1208.04	1502.32	1533.49	1517.91	2407.34	938.138	-1.35957	0.00178517	NA	NA
LOC_Os03g29770	994.296	3090.81	2042.55	403.199	618.857	511.028	783.413	2983.3	1883.35	662.177	1872.21	1267.19	492.92	1607.61	1050.27	203.666	4294.95	2249.31	589.945	2411.29	2.03115	0.000147479	NA	NA
LOC_Os03g29810	2692.09	1010.18	1851.13	3270.91	2062.86	2666.88	2887.79	1613.64	2250.72	2698.25	1511.77	2105.01	1759.45	987.298	1373.37	2835.31	1078.16	1956.73	2690.63	1377.32	-0.966087	0.0284332	NA	NA
LOC_Os03g29950	1058.92	410.637	734.777	750.137	345.746	547.942	560.891	165.224	363.057	1331.98	260.193	796.085	545.733	75.172	310.452	294.057	442.352	368.205	756.952	283.221	-1.41828	0.00925716	NA	NA
LOC_Os03g30084	2.93736	0	1.46868	1.56279	0	0.781393	0	0	0	0	0	0	0	0	0	1.14419	0	0.572096	0.940723	0	#NUM!	0.0481021	NA	NA
LOC_Os03g30250	2251.49	400.411	1325.95	339.124	404.823	371.974	1130.95	225.446	678.197	1554.93	423.09	989.008	758.94	24.86	391.9	240.28	172.222	206.251	1045.95	275.142	-1.92657	0.00109387	NA	NA
LOC_Os03g31260	0	2.69093	1.34547	0	4.84238	2.42119	0	0	0	0	0	0	0	7.69477	3.84738	0	5.89803	2.94902	0	3.52102	#DIV/0!	0.0066757	NA	NA
LOC_Os03g31280	0	1.07637	0.538187	1.56279	2.90543	2.23411	0	3.0883	1.54415	0	2.94836	1.47418	0	2.36762	1.18381	0	3.53882	1.76941	0.260464	2.65415	3.34909	0.0221607	NA	NA
LOC_Os03g31510	368.638	2194.19	1281.41	384.445	592.708	488.577	527.554	1561.13	1044.34	373.487	1333.4	853.441	1073.86	6173.57	3623.72	271.174	3969.37	2120.27	499.86	2637.4	2.39952	1.64053e-05	NA	NA
LOC_Os03g31550	1652.26	1202.31	1427.29	1293.99	737.979	1015.98	1233.46	549.717	891.588	2763.04	741.512	1752.28	1722.29	798.48	1260.38	1606.45	672.375	1139.41	1711.91	783.729	-1.12718	0.0209033	NA	NA
LOC_Os03g32050	33.7796	120.016	76.8977	14.0651	194.664	104.364	19.1686	592.953	306.061	16.1971	692.127	354.162	43.0327	137.322	90.1773	12.5861	107.344	59.9651	23.1382	307.404	3.73179	2.28713e-05	NA	NA
LOC_Os03g32450	26.4362	0	13.2181	3.12557	1.93695	2.53126	0	0	0	28.5832	0	14.2916	1.95603	0	0.978016	0	0	0	10.0168	0.322826	-4.95553	0.0104846	NA	NA
LOC_Os03g32580	1777.1	3151.62	2464.36	867.346	1772.31	1319.83	750.076	3012.63	1881.36	1989.39	2447.87	2218.63	2129.14	3660.93	2895.04	1441.68	2811	2126.34	1492.46	2809.4	0.912572	0.0318409	NA	NA
LOC_Os03g33650	35.2483	240.57	137.909	87.516	126.87	107.193	118.345	129.709	124.027	23.8193	423.09	223.454	122.252	477.667	299.96	215.108	266.591	240.85	100.382	277.416	1.46656	0.0344909	NA	NA
LOC_Os03g34040	10997.5	3182.84	7090.15	9683.02	5659.78	7671.4	5598.07	4252.59	4925.33	11687.7	5071.18	8379.42	4316.96	2134.41	3225.69	4152.27	3767.66	3959.97	7739.24	4011.41	-0.948084	0.0388367	NA	NA
LOC_Os03g36520	0	0	0	1.56279	0	0.781393	0.833418	0	0.416709	8.57496	0	4.28748	0.978016	0	0.489008	2.28838	0	1.14419	2.37293	0	#NUM!	0.00992088	NA	NA
LOC_Os03g36750	3201.72	607.613	1904.67	845.467	922.958	884.213	2906.13	2126.29	2516.21	2615.36	961.902	1788.63	904.665	453.991	679.328	1124.74	677.094	900.917	1933.01	958.309	-1.01229	0.0442639	NA	NA
LOC_Os03g37120	1.46868	0	0.73434	0	0	0	1.66684	0	0.833418	2.85832	0	1.42916	19.5603	0	9.78016	0	0	0	4.25903	0	#NUM!	0.00465528	NA	NA
LOC_Os03g37140	0	33.3676	16.6838	1.56279	3.87391	2.71835	2.50025	21.6181	12.0592	3.81109	30.2207	17.0159	0.978016	60.9662	30.9721	9.15354	42.4658	25.8097	3.00095	32.0854	3.41843	0.0056774	NA	NA
LOC_Os03g37470	226.177	47.8986	137.038	159.404	50.3608	104.882	138.347	24.7064	81.5269	262.965	66.3381	164.652	73.3512	11.8381	42.5946	58.3538	53.0823	55.718	153.1	42.3707	-1.85333	0.0225413	NA	NA
LOC_Os03g37840	243.801	67.2734	155.537	29.6929	31.9597	30.8263	39.1707	4.63245	21.9016	193.413	13.2676	103.34	31.2965	2.95953	17.128	17.1629	20.0533	18.6081	92.4228	23.3577	-1.98435	0.0456212	NA	NA
LOC_Os03g38350	4.40604	62.9679	33.687	0	2.90543	1.45272	0	0	0	1.90555	6.63381	4.26968	2.93405	6.51096	4.7225	0	38.927	19.4635	1.54094	19.6575	3.6732	0.0298723	NA	NA
LOC_Os03g38470	73.434	2.15275	37.7934	1.56279	0	0.781393	5.83393	0	2.91696	68.5997	0	34.2998	17.6043	0	8.80214	18.3071	0	9.15354	30.8903	0.358791	-6.42786	2.15957e-05	NA	NA
LOC_Os03g38590	311.36	587.7	449.53	123.46	307.007	215.234	69.1737	240.887	155.03	296.312	318.423	307.368	146.702	279.971	213.337	64.0748	484.818	274.446	168.514	369.801	1.13388	0.0426344	NA	NA
LOC_Os03g38710	0	2.69093	1.34547	0	0	0	0	0	0	0	5.89672	2.94836	0	0.591905	0.295953	0	0	0	0	1.52993	#DIV/0!	0.0474586	NA	NA
LOC_Os03g38790	402.418	292.774	347.596	625.114	414.508	519.811	370.038	18.5298	194.284	507.828	264.615	386.222	655.271	80.4991	367.885	765.465	448.25	606.857	554.356	253.196	-1.13056	0.0117111	NA	NA
LOC_Os03g39650	29.3736	0.538187	14.9559	0	0.968477	0.484238	13.3347	0	6.66735	57.1664	0	28.5832	3.91206	0.591905	2.25198	5.72096	1.17961	3.45028	18.2513	0.546363	-5.062	0.0120527	NA	NA
LOC_Os03g40020	1903.41	286.315	1094.86	1419.01	1298.73	1358.87	1410.98	920.313	1165.64	1671.16	743.724	1207.44	553.557	481.219	517.388	1123.6	272.489	698.043	1346.95	667.131	-1.01366	0.0277732	NA	NA
LOC_Os03g40194	35.2483	113.019	74.1338	9.37671	9.68477	9.53074	3.33367	217.725	110.529	52.4025	278.62	165.511	18.5823	286.482	152.532	5.72096	97.9073	51.8141	20.7774	167.24	3.00883	0.001317	NA	NA
LOC_Os03g40210	1.46868	4.3055	2.88709	0	0.968477	0.484238	0	4.63245	2.31622	2.85832	6.63381	4.74606	0	2.95953	1.47976	0	3.53882	1.76941	0.721166	3.83976	2.41261	0.041559	NA	NA
LOC_Os03g40260	212.958	161.994	187.476	218.79	143.335	181.062	213.355	98.8255	156.09	459.237	94.3475	276.792	293.405	62.15	177.777	318.085	62.5191	190.302	285.972	103.862	-1.46121	0.0322996	NA	NA
LOC_Os03g40320	0	0.538187	0.269093	0	0.968477	0.484238	0	0	0	0	2.21127	1.10563	0	2.36762	1.18381	0	1.17961	0.589803	0	1.21086	#DIV/0!	0.0305521	NA	NA
LOC_Os03g40550	1395.25	258.33	826.788	1409.63	942.328	1175.98	1412.64	923.401	1168.02	1353.89	608.099	980.995	791.215	510.222	650.719	1271.2	277.207	774.203	1272.3	586.598	-1.117	0.0141062	NA	NA
LOC_Os03g40830	4994.98	1088.75	3041.87	2520.77	1763.6	2142.18	3120.32	2035.19	2577.75	2558.2	842.494	1700.34	1501.25	848.792	1175.02	907.344	1019.18	963.262	2600.48	1266.33	-1.03812	0.0482328	NA	NA
LOC_Os03g41120	70.4966	40.364	55.4303	201.599	186.916	194.258	162.517	35.5154	99.016	77.1746	24.324	50.7493	129.098	13.6138	71.356	175.061	17.6941	96.3778	135.991	53.0712	-1.35751	0.0273083	NA	NA
LOC_Os03g41170	33.7796	12.9165	23.3481	48.4464	27.1174	37.7819	27.5028	0	13.7514	42.8748	4.42254	23.6487	32.2745	5.32715	18.8008	25.1722	4.71842	14.9453	35.0084	9.08366	-1.94636	0.0255616	NA	NA
LOC_Os03g41390	83.7147	277.704	180.71	92.2043	156.893	124.549	52.5054	203.828	128.167	82.8913	249.136	166.014	168.219	179.347	173.783	27.4606	375.115	201.288	84.4992	240.337	1.50805	0.030341	NA	NA
LOC_Os03g41510	3734.85	971.428	2353.14	3686.61	2290.45	2988.53	2514.42	1948.72	2231.57	3914.95	2025.52	2970.23	1632.31	1017.48	1324.9	2042.38	1134.78	1588.58	2920.92	1564.73	-0.900509	0.0455285	NA	NA
LOC_Os03g41860	0	0.538187	0.269093	0	3.87391	1.93695	0	0	0	0	0	0	0	1.18381	0.591905	0	2.35921	1.17961	0	1.32585	#DIV/0!	0.043323	NA	NA
LOC_Os03g42420	2.93736	80.728	41.8327	9.37671	6.77934	8.07803	15.0015	117.355	66.1784	0	81.0799	40.5399	1.95603	131.995	66.9754	3.43258	36.5678	20.0002	5.4507	75.7509	3.79675	0.000700756	NA	NA
LOC_Os03g42569	54.3411	8.0728	31.207	214.102	134.618	174.36	168.351	6.1766	87.2635	91.4662	16.216	53.8411	121.274	13.0219	67.1479	116.708	12.9757	64.8416	127.707	31.8469	-2.00361	0.0017913	NA	NA
LOC_Os03g42830	227.645	68.3497	147.998	148.465	92.0053	120.235	84.1753	6.1766	45.1759	137.199	10.3193	73.7593	88.9994	18.941	53.9702	12.5861	24.7717	18.6789	116.512	36.7606	-1.66424	0.0426157	NA	NA
LOC_Os03g43400	5.87472	72.6552	39.265	82.8276	77.4781	80.1529	15.8349	310.374	163.104	11.4333	206.385	108.909	162.351	232.027	197.189	12.5861	47.1842	29.8852	48.4846	157.684	1.70144	0.00843015	NA	NA
LOC_Os03g43410	186.522	1566.66	876.592	176.595	353.494	265.044	188.353	3349.26	1768.81	203.893	2269.5	1236.7	774.588	1888.18	1331.38	135.015	1948.71	1041.86	277.494	1895.97	2.7724	2.27402e-07	NA	NA
[truncated: 5,599 more rows]

## Sheet: Treatment effect only
	Nipponbare			IR64			8391			8753			F291			F274-2a			Average			Multifactorial linear model testing
Gene id	C	T	avg.	C	T	avg.	C	T	avg.	C	T	avg.	C	T	avg.	C	T	avg.	C	T	log2foldchange	treatment effect	genotype effect	interaction
LOC_Os01g03290	5.87472	0	2.93736	0	0	0	2.50025	0	1.25013	8.57496	0	4.28748	3.91206	0	1.95603	0	0	0	3.477	0	#NUM!	0.00299989	NA	NA
LOC_Os01g03300	1.46868	0	0.73434	0	0	0	0	0	0	2.85832	0	1.42916	1.95603	0	0.978016	0	0	0	1.04717	0	#NUM!	0.0296626	NA	NA
LOC_Os01g06140	0	11.8401	5.92006	0	0.968477	0.484238	0	0	0	0	1.47418	0.73709	0	0.591905	0.295953	0	0	0	0	2.47911	#DIV/0!	0.0298041	NA	NA
LOC_Os01g06980	0	0	0	0	0	0	0	0	0	1.90555	0	0.952773	1.95603	0	0.978016	1.14419	0	0.572096	0.834295	0	#NUM!	0.0471365	NA	NA
LOC_Os01g07010	0	0	0	0	0	0	0	0	0	0.952773	0	0.476387	2.93405	0	1.46702	5.72096	0	2.86048	1.6013	0	#NUM!	0.0294662	NA	NA
LOC_Os01g07030	0	0	0	3.12557	0	1.56279	0	0	0	0	0	0	5.86809	0	2.93405	2.28838	0	1.14419	1.88034	0	#NUM!	0.0217176	NA	NA
LOC_Os01g07040	0	0	0	0	0	0	0.833418	0	0.416709	1.90555	0	0.952773	5.86809	0	2.93405	3.43258	0	1.71629	2.00661	0	#NUM!	0.0144061	NA	NA
LOC_Os01g07050	0	0	0	4.68836	0	2.34418	0	0	0	1.90555	0	0.952773	2.93405	0	1.46702	3.43258	0	1.71629	2.16009	0	#NUM!	0.00938804	NA	NA
LOC_Os01g09130	0	2.69093	1.34547	0	0	0	0	1.54415	0.772074	0	0	0	0	2.95953	1.47976	0	3.53882	1.76941	0	1.7889	#DIV/0!	0.0191262	NA	NA
LOC_Os01g12940	1.46868	0	0.73434	1.56279	0	0.781393	0.833418	0	0.416709	35.2526	0	17.6263	1.95603	0	0.978016	0	0	0	6.84559	0	#NUM!	0.00234347	NA	NA
LOC_Os01g16390	1.46868	0	0.73434	1.56279	0	0.781393	0	0	0	0	0	0	1.95603	0	0.978016	1.14419	0	0.572096	1.02195	0	#NUM!	0.026739	NA	NA
LOC_Os01g19120	0	2.15275	1.07637	0	2.90543	1.45272	0	0	0	0	0	0	0	1.77572	0.887858	0	5.89803	2.94902	0	2.12199	#DIV/0!	0.0190667	NA	NA
LOC_Os01g20030	0	2.69093	1.34547	0	0	0	0	0	0	0	1.47418	0.73709	0	7.69477	3.84738	0	3.53882	1.76941	0	2.56645	#DIV/0!	0.0122012	NA	NA
LOC_Os01g31420	0	9.68737	4.84368	0	0.968477	0.484238	0	1.54415	0.772074	0	55.2817	27.6409	0	9.47048	4.73524	0	33.029	16.5145	0	18.3302	#DIV/0!	5.6971e-05	NA	NA
LOC_Os01g37140	0	3.22912	1.61456	0	0.968477	0.484238	0	0	0	0	0	0	0	3.55143	1.77572	0	1.17961	0.589803	0	1.48811	#DIV/0!	0.0340127	NA	NA
LOC_Os01g45320	4.40604	0	2.20302	1.56279	0	0.781393	0.833418	0	0.416709	4.76387	0	2.38193	0	0	0	0	0	0	1.92768	0	#NUM!	0.0138064	NA	NA
LOC_Os01g45420	0	6.99643	3.49822	0	4.84238	2.42119	0	0	0	0	0	0	0	0	0	0	1.17961	0.589803	0	2.16974	#DIV/0!	0.0369584	NA	NA
LOC_Os01g45430	0	0.538187	0.269093	0	0	0	0	3.0883	1.54415	0	2.94836	1.47418	0	1.77572	0.887858	0	0	0	0	1.39176	#DIV/0!	0.0274089	NA	NA
LOC_Os01g46460	0	0	0	6.25114	0	3.12557	1.66684	0	0.833418	0.952773	0	0.476387	0.978016	0	0.489008	3.43258	0	1.71629	2.21356	0	#NUM!	0.0100905	NA	NA
LOC_Os01g52930	0	9.14918	4.57459	0	0	0	0	0	0	0	0	0	0	3.55143	1.77572	0	2.35921	1.17961	0	2.50997	#DIV/0!	0.0231682	NA	NA
LOC_Os01g53010	0	2.15275	1.07637	0	0	0	0	4.63245	2.31622	0	6.63381	3.3169	0	11.8381	5.91905	0	1.17961	0.589803	0	4.40612	#DIV/0!	0.00223113	NA	NA
LOC_Os01g54170	10.2808	0	5.14038	0	0	0	0	0	0	0	0	0	1.95603	0	0.978016	0	0	0	2.03946	0	#NUM!	0.0315635	NA	NA
LOC_Os01g59360	1.46868	0	0.73434	1.56279	0	0.781393	0	0	0	0.952773	0	0.476387	0.978016	0	0.489008	0	0	0	0.827042	0	#NUM!	0.0311417	NA	NA
LOC_Os01g59720	0	1.07637	0.538187	0	0	0	0	0	0	0	0.73709	0.368545	0	12.43	6.215	0	0	0	0	2.37391	#DIV/0!	0.0409545	NA	NA
LOC_Os01g60710	0	4.84368	2.42184	0	7.74781	3.87391	0	1.54415	0.772074	0	54.5446	27.2723	0	1.18381	0.591905	0	3.53882	1.76941	0	12.2338	#DIV/0!	0.00037982	NA	NA
LOC_Os01g64160	0	2.69093	1.34547	0	1.93695	0.968477	0	0	0	0	0	0	0	4.73524	2.36762	0	1.17961	0.589803	0	1.75712	#DIV/0!	0.0260766	NA	NA
LOC_Os01g70370	0	1.61456	0.80728	0	0	0	0	0	0	0	2.94836	1.47418	0	15.9814	7.99072	0	2.35921	1.17961	0	3.81726	#DIV/0!	0.00807808	NA	NA
LOC_Os01g71130	0	61.8915	30.9458	0	0	0	0	4.63245	2.31622	0	2.94836	1.47418	0	18.941	9.47048	0	3.53882	1.76941	0	15.3253	#DIV/0!	0.000214686	NA	NA
LOC_Os01g72590	0	6.45824	3.22912	0	14.5272	7.26358	0	7.72074	3.86037	0	26.5352	13.2676	0	4.14334	2.07167	0	2.35921	1.17961	0	10.2907	#DIV/0!	0.000123844	NA	NA
LOC_Os01g72730	7.3434	0	3.6717	3.12557	0	1.56279	3.33367	0	1.66684	0	0	0	0.978016	0	0.489008	0	0	0	2.46344	0	#NUM!	0.00911102	NA	NA
LOC_Os02g02100	0	5.38187	2.69093	0	0	0	0	0	0	0	0.73709	0.368545	0	0	0	0	5.89803	2.94902	0	2.00283	#DIV/0!	0.0363282	NA	NA
LOC_Os02g12550	0	0	0	0	0	0	0	0	0	0	11.0563	5.52817	0	2.95953	1.47976	0	3.53882	1.76941	0	2.92578	#DIV/0!	0.015172	NA	NA
LOC_Os02g14460	0	0	0	1.56279	0	0.781393	0	0	0	0	0	0	2.93405	0	1.46702	2.28838	0	1.14419	1.13087	0	#NUM!	0.039898	NA	NA
LOC_Os02g15020	0	22.6039	11.3019	0	1.93695	0.968477	0	24.7064	12.3532	0	22.8498	11.4249	0	0	0	0	2.35921	1.17961	0	12.4094	#DIV/0!	0.000251824	NA	NA
LOC_Os02g15780	2.93736	0	1.46868	1.56279	0	0.781393	1.66684	0	0.833418	0	0	0	0	0	0	1.14419	0	0.572096	1.21853	0	#NUM!	0.0294805	NA	NA
LOC_Os02g16070	5.87472	0	2.93736	0	0	0	0	0	0	8.57496	0	4.28748	0	0	0	0	0	0	2.40828	0	#NUM!	0.0222848	NA	NA
LOC_Os02g17150	0	8.61099	4.3055	0	0	0	0	0	0	0	0	0	0	1.77572	0.887858	0	2.35921	1.17961	0	2.12432	#DIV/0!	0.0325366	NA	NA
LOC_Os02g19000	2.93736	0	1.46868	0	0	0	0.833418	0	0.416709	5.71664	0	2.85832	0	0	0	0	0	0	1.58124	0	#NUM!	0.0289588	NA	NA
LOC_Os02g20260	1.46868	0	0.73434	0	0	0	0.833418	0	0.416709	1.90555	0	0.952773	0.978016	0	0.489008	0	0	0	0.864277	0	#NUM!	0.0323625	NA	NA
LOC_Os02g21320	0	0.538187	0.269093	0	0	0	0	6.1766	3.0883	0	0.73709	0.368545	0	6.51096	3.25548	0	2.35921	1.17961	0	2.72034	#DIV/0!	0.00838753	NA	NA
LOC_Os02g27680	0	0	0	0	3.87391	1.93695	0	0	0	0	2.21127	1.10563	0	4.14334	2.07167	0	1.17961	0.589803	0	1.90135	#DIV/0!	0.019716	NA	NA
LOC_Os02g28180	0	1.61456	0.80728	0	0	0	0	12.3532	6.1766	0	0.73709	0.368545	0	1.77572	0.887858	0	7.07764	3.53882	0	3.92637	#DIV/0!	0.0042697	NA	NA
LOC_Os02g30090	0	1.61456	0.80728	0	0	0	0	0	0	0	0	0	0	6.51096	3.25548	0	2.35921	1.17961	0	1.74745	#DIV/0!	0.037032	NA	NA
LOC_Os02g30740	0	2.15275	1.07637	0	0.968477	0.484238	0	0	0	0	0	0	0	7.69477	3.84738	0	2.35921	1.17961	0	2.19587	#DIV/0!	0.0211259	NA	NA
LOC_Os02g32680	0	1.61456	0.80728	0	0	0	0	3.0883	1.54415	0	0	0	0	0.591905	0.295953	0	1.17961	0.589803	0	1.07906	#DIV/0!	0.0436906	NA	NA
LOC_Os02g34250	0	4.84368	2.42184	0	0	0	0	0	0	0	0	0	0	20.1248	10.0624	0	4.71842	2.35921	0	4.94781	#DIV/0!	0.00793257	NA	NA
LOC_Os02g36680	2.93736	0	1.46868	0	0	0	2.50025	0	1.25013	0	0	0	2.93405	0	1.46702	1.14419	0	0.572096	1.58598	0	#NUM!	0.0162265	NA	NA
[truncated: 2,365 more rows]

## Sheet: Genotype effect only
	Nipponbare			IR64			8391			8753			F291			F274-2a			Average			Multifactorial linear model testing
[truncated: 3,801 more rows]

[truncated: 1 more sheets: Treatment+genotype]
