# Supplementary material for: RNA-Seq Analysis of Diverse Rice Genotypes to Identify the Genes Controlling Coleoptile Growth during Submerged Germination
Source: Front Plant Sci. 2017 May 15;8:762. doi: 10.3389/fpls.2017.00762 (PMC5430036; doi:10.3389/fpls.2017.00762)
Supplement: Supplementary file 6 [file Table6.xlsx]

## Sheet: summary
Table S6. GO enrichmnet analysis of submergence regulated genes
GO Information			CM		up-regulated		down-regulated
GO Term	Onto	Description	1	2	FDR	Num	FDR	Num
GO:0045449	P	regulation of transcription			4.2e-17	171	---	---
GO:0019219	P	regulation of nucleobase, nucleoside, nucleotide and nucleic acid metabolic process			4.2e-17	171	---	---
GO:0051171	P	regulation of nitrogen compound metabolic process			4.2e-17	171	---	---
GO:0009889	P	regulation of biosynthetic process			1.4e-16	171	---	---
GO:0010556	P	regulation of macromolecule biosynthetic process			1.4e-16	171	---	---
GO:0031326	P	regulation of cellular biosynthetic process			1.4e-16	171	---	---
GO:0031323	P	regulation of cellular metabolic process			3.7e-16	171	---	---
GO:0010468	P	regulation of gene expression			3.7e-16	171	---	---
GO:0080090	P	regulation of primary metabolic process			9.4e-16	172	---	---
GO:0006979	P	response to oxidative stress			1.2e-15	48	---	---
GO:0060255	P	regulation of macromolecule metabolic process			2.6e-15	172	---	---
GO:0006350	P	transcription			2.6e-15	172	---	---
GO:0019222	P	regulation of metabolic process			5.5e-15	172	---	---
GO:0050794	P	regulation of cellular process			2e-13	185	---	---
GO:0042221	P	response to chemical stimulus			2.7e-12	54	---	---
GO:0050789	P	regulation of biological process			5.7e-12	186	---	---
GO:0006468	P	protein amino acid phosphorylation			2.7e-11	150	---	---
GO:0065007	P	biological regulation			3.3e-11	189	---	---
GO:0006464	P	protein modification process			3.8e-11	177	---	---
GO:0043687	P	post-translational protein modification			7.2e-11	164	---	---
GO:0043412	P	macromolecule modification			2.2e-10	177	---	---
GO:0016310	P	phosphorylation			2.5e-09	154	---	---
GO:0005975	P	carbohydrate metabolic process			2.6e-09	92	8.3e-07	72
GO:0006796	P	phosphate metabolic process			9.9e-09	159	---	---
GO:0006793	P	phosphorus metabolic process			9.9e-09	159	---	---
GO:0050896	P	response to stimulus			4.7e-08	99	---	---
GO:0006950	P	response to stress			5e-08	89	---	---
GO:0006355	P	regulation of transcription, DNA-dependent			1e-06	79	---	---
GO:0051252	P	regulation of RNA metabolic process			1.1e-06	79	---	---
GO:0044262	P	cellular carbohydrate metabolic process			2.4e-06	46	---	---
GO:0006351	P	transcription, DNA-dependent			7.9e-06	79	---	---
GO:0032774	P	RNA biosynthetic process			8.3e-06	79	---	---
GO:0010876	P	lipid localization			1.4e-05	20	2e-06	20
GO:0006869	P	lipid transport			1.4e-05	20	2e-06	20
GO:0010467	P	gene expression			2.8e-05	184	---	---
GO:0006096	P	glycolysis			0.00049	14	0.015	9
GO:0006006	P	glucose metabolic process			0.00098	17	0.00059	16
GO:0044282	P	small molecule catabolic process			0.0019	19	0.0033	16
GO:0044275	P	cellular carbohydrate catabolic process			0.002	15	0.011	11
GO:0046164	P	alcohol catabolic process			0.002	15	0.011	11
GO:0019318	P	hexose metabolic process			0.0022	18	0.0024	16
GO:0016052	P	carbohydrate catabolic process			0.0023	18	0.0005	18
GO:0006066	P	alcohol metabolic process			0.0026	23	0.004	19
GO:0019320	P	hexose catabolic process			0.0028	14	0.0079	11
GO:0006007	P	glucose catabolic process			0.0028	14	0.0079	11
GO:0046365	P	monosaccharide catabolic process			0.0028	14	0.0079	11
GO:0005996	P	monosaccharide metabolic process			0.0028	19	0.004	16
GO:0044267	P	cellular protein metabolic process			0.0037	191	---	---
GO:0005984	P	disaccharide metabolic process			0.0039	9	---	---
GO:0016137	P	glycoside metabolic process			0.0039	9	---	---
GO:0016070	P	RNA metabolic process			0.0042	86	---	---
GO:0042545	P	cell wall modification			0.0043	9	---	---
GO:0071554	P	cell wall organization or biogenesis			0.0043	18	---	---
GO:0009311	P	oligosaccharide metabolic process			0.0048	9	---	---
GO:0005992	P	trehalose biosynthetic process			0.0049	7	---	---
GO:0005991	P	trehalose metabolic process			0.0057	7	---	---
GO:0016138	P	glycoside biosynthetic process			0.0076	7	---	---
GO:0046351	P	disaccharide biosynthetic process			0.0076	7	---	---
GO:0009312	P	oligosaccharide biosynthetic process			0.0088	7	---	---
GO:0009607	P	response to biotic stimulus			0.015	5	---	---
GO:0071555	P	cell wall organization			0.019	11	---	---
GO:0034637	P	cellular carbohydrate biosynthetic process			0.023	13	---	---
GO:0006865	P	amino acid transport			0.024	6	---	---
GO:0015837	P	amine transport			0.024	6	---	---
GO:0044281	P	small molecule metabolic process			0.028	74	0.00071	70
GO:0016051	P	carbohydrate biosynthetic process			0.032	13	---	---
GO:0015849	P	organic acid transport			0.037	6	---	---
GO:0046942	P	carboxylic acid transport			0.037	6	---	---
GO:0005506	F	iron ion binding			3.1e-19	110	0.0004	52
GO:0009055	F	electron carrier activity			1.1e-18	124	1.1e-07	76
GO:0020037	F	heme binding			2.3e-17	95	7.8e-05	49
GO:0046906	F	tetrapyrrole binding			3.4e-17	95	6.1e-05	50
GO:0016209	F	antioxidant activity			9.5e-17	53	---	---
GO:0004601	F	peroxidase activity			2.4e-16	50	---	---
GO:0016684	F	oxidoreductase activity, acting on peroxide as acceptor			2.4e-16	50	---	---
GO:0016491	F	oxidoreductase activity			2.3e-15	193	3.7e-10	143
GO:0004713	F	protein tyrosine kinase activity			7.5e-14	148	---	---
GO:0004674	F	protein serine/threonine kinase activity			1.3e-13	147	---	---
GO:0016301	F	kinase activity			3.9e-12	165	---	---
GO:0004672	F	protein kinase activity			1.8e-11	151	---	---
GO:0016773	F	phosphotransferase activity, alcohol group as acceptor			1.9e-11	161	---	---
GO:0003700	F	transcription factor activity			2.8e-11	84	---	---
GO:0030528	F	transcription regulator activity			2.6e-10	108	---	---
GO:0001883	F	purine nucleoside binding			2.3e-08	240	---	---
GO:0030554	F	adenyl nucleotide binding			2.3e-08	240	---	---
GO:0001882	F	nucleoside binding			2.8e-08	240	---	---
GO:0017076	F	purine nucleotide binding			2.5e-07	245	---	---
GO:0000166	F	nucleotide binding			8.3e-07	265	---	---
GO:0032559	F	adenyl ribonucleotide binding			8.3e-07	222	---	---
GO:0005524	F	ATP binding			1.1e-06	221	---	---
GO:0032555	F	purine ribonucleotide binding			6e-06	227	---	---
GO:0032553	F	ribonucleotide binding			6e-06	227	---	---
GO:0004497	F	monooxygenase activity			7.2e-06	48	9e-06	41
GO:0004553	F	hydrolase activity, hydrolyzing O-glycosyl compounds			1.9e-05	49	9e-06	43
GO:0048037	F	cofactor binding			6.5e-05	54	9.3e-09	57
GO:0043565	F	sequence-specific DNA binding			8e-05	47	---	---
GO:0050662	F	coenzyme binding			0.00011	41	1e-05	38
GO:0016757	F	transferase activity, transferring glycosyl groups			0.00011	53	---	---
GO:0016798	F	hydrolase activity, acting on glycosyl bonds			0.00019	49	3.1e-05	44
GO:0005509	F	calcium ion binding			0.00022	40	---	---
GO:0016758	F	transferase activity, transferring hexosyl groups			0.0027	41	0.047	28
GO:0050660	F	FAD binding			0.0034	19	0.038	13
GO:0030246	F	carbohydrate binding			0.0064	31	---	---
GO:0005529	F	sugar binding			0.0067	27	---	---
GO:0016705	F	oxidoreductase activity, acting on paired donors, with incorporation or reduction of molecular oxygen			0.012	10	---	---
GO:0030414	F	peptidase inhibitor activity			0.016	12	---	---
GO:0015171	F	amino acid transmembrane transporter activity			0.019	6	---	---
GO:0005275	F	amine transmembrane transporter activity			0.019	6	---	---
GO:0015035	F	protein disulfide oxidoreductase activity			0.032	8	---	---
GO:0004866	F	endopeptidase inhibitor activity			0.033	11	---	---
GO:0004857	F	enzyme inhibitor activity			0.036	17	---	---
GO:0015036	F	disulfide oxidoreductase activity			0.036	8	---	---
GO:0010181	F	FMN binding			0.038	6	---	---
GO:0016769	F	transferase activity, transferring nitrogenous groups			0.05	8	0.04	7
GO:0005576	C	extracellular region			0.0043	30	0.015	22
GO:0005618	C	cell wall			0.01	13	---	---
GO:0030312	C	external encapsulating structure			0.041	13	---	---
GO:0006629	P	lipid metabolic process			---	---	0.00047	41
GO:0009308	P	amine metabolic process			---	---	0.0005	36
GO:0006519	P	cellular amino acid and derivative metabolic process			---	---	0.00059	35
GO:0006022	P	aminoglycan metabolic process			---	---	0.00098	8
GO:0055114	P	oxidation reduction			---	---	0.0012	25
GO:0015977	P	carbon fixation			---	---	0.0027	5
GO:0044283	P	small molecule biosynthetic process			---	---	0.0027	26
GO:0071704	P	organic substance metabolic process			---	---	0.0027	5
GO:0005976	P	polysaccharide metabolic process			---	---	0.0028	16
GO:0043436	P	oxoacid metabolic process			---	---	0.0034	36
GO:0006082	P	organic acid metabolic process			---	---	0.0034	36
GO:0019752	P	carboxylic acid metabolic process			---	---	0.0034	36
GO:0042180	P	cellular ketone metabolic process			---	---	0.0038	36
GO:0006808	P	regulation of nitrogen utilization			---	---	0.004	6
GO:0019740	P	nitrogen utilization			---	---	0.004	6
GO:0006026	P	aminoglycan catabolic process			---	---	0.006	6
GO:0015833	P	peptide transport			---	---	0.006	12
GO:0006030	P	chitin metabolic process			---	---	0.006	6
GO:0006032	P	chitin catabolic process			---	---	0.006	6
GO:0006857	P	oligopeptide transport			---	---	0.006	12
GO:0000272	P	polysaccharide catabolic process			---	---	0.006	7
GO:0009057	P	macromolecule catabolic process			---	---	0.006	25
GO:0006810	P	transport			---	---	0.0079	88
GO:0051234	P	establishment of localization			---	---	0.0079	88
GO:0006575	P	cellular amino acid derivative metabolic process			---	---	0.0084	10
GO:0051179	P	localization			---	---	0.01	88
GO:0009056	P	catabolic process			---	---	0.013	30
GO:0042398	P	cellular amino acid derivative biosynthetic process			---	---	0.014	6
GO:0044106	P	cellular amine metabolic process			---	---	0.014	26
GO:0016053	P	organic acid biosynthetic process			---	---	0.015	17
GO:0046394	P	carboxylic acid biosynthetic process			---	---	0.015	17
GO:0006520	P	cellular amino acid metabolic process			---	---	0.015	24
GO:0044036	P	cell wall macromolecule metabolic process			---	---	0.016	7
GO:0034641	P	cellular nitrogen compound metabolic process			---	---	0.017	31
GO:0009064	P	glutamine family amino acid metabolic process			---	---	0.025	6
GO:0043648	P	dicarboxylic acid metabolic process			---	---	0.031	7
GO:0044271	P	cellular nitrogen compound biosynthetic process			---	---	0.043	17
GO:0019748	P	secondary metabolic process			---	---	0.045	7
GO:0016829	F	lyase activity			---	---	5.1e-05	30
GO:0008171	F	O-methyltransferase activity			---	---	7.4e-05	12
GO:0003824	F	catalytic activity			---	---	9e-05	586
GO:0008168	F	methyltransferase activity			---	---	0.00025	26
GO:0016741	F	transferase activity, transferring one-carbon groups			---	---	0.00032	26
GO:0016846	F	carbon-sulfur lyase activity			---	---	0.00034	8
GO:0016746	F	transferase activity, transferring acyl groups			---	---	0.00096	29
GO:0003993	F	acid phosphatase activity			---	---	0.0013	9
GO:0016747	F	transferase activity, transferring acyl groups other than amino-acyl groups			---	---	0.0016	27
GO:0016984	F	ribulose-bisphosphate carboxylase activity			---	---	0.0016	5
GO:0016564	F	transcription repressor activity			---	---	0.0022	6
GO:0042578	F	phosphoric ester hydrolase activity			---	---	0.0029	22
GO:0030170	F	pyridoxal phosphate binding			---	---	0.0042	15
GO:0070279	F	vitamin B6 binding			---	---	0.0042	15
GO:0003872	F	6-phosphofructokinase activity			---	---	0.0052	5
GO:0004568	F	chitinase activity			---	---	0.0059	6
GO:0008443	F	phosphofructokinase activity			---	---	0.0074	5
GO:0051287	F	NAD or NADH binding			---	---	0.0096	8
GO:0016791	F	phosphatase activity			---	---	0.018	17
GO:0019200	F	carbohydrate kinase activity			---	---	0.019	6
GO:0016903	F	oxidoreductase activity, acting on the aldehyde or oxo group of donors			---	---	0.029	5
GO:0019842	F	vitamin binding			---	---	0.031	17
GO:0016614	F	oxidoreductase activity, acting on CH-OH group of donors			---	---	0.034	11
GO:0050661	F	NADP or NADPH binding			---	---	0.034	6
GO:0016616	F	oxidoreductase activity, acting on the CH-OH group of donors, NAD or NADP as acceptor			---	---	0.038	10
GO:0015079	F	potassium ion transmembrane transporter activity			---	---	0.038	5
GO:0030145	F	manganese ion binding			---	---	0.048	7
GO:0045735	F	nutrient reservoir activity			---	---	0.049	8
GO:0016020	C	membrane			---	---	0.015	111
GO:0044436	C	thylakoid part			---	---	0.015	6
GO:0048046	C	apoplast			---	---	0.015	11
GO:0005945	C	6-phosphofructokinase complex			---	---	0.015	5
GO:0009579	C	thylakoid			---	---	0.017	9
GO:0034357	C	photosynthetic membrane			---	---	0.037	8
GO:0005829	C	cytosol			---	---	0.048	5
GO:0044445	C	cytosolic part			---	---	0.048	5

## Sheet: up-regulated
Table S4. GO enrichmnet of DE genes
GO_acc	term_type	Term	queryitem	querytotal	bgitem	bgtotal	pvalue	FDR	entries
GO:0045449	P	regulation of transcription	171	1247	1576	24460	4.2e-19	4.2e-17	// LOC_Os07g48450 // LOC_Os05g04210 // LOC_Os01g64790 // LOC_Os01g09120 // LOC_Os04g57720 // LOC_Os08g38210 // LOC_Os06g17480 // LOC_Os01g68370 // LOC_Os05g37080 // LOC_Os07g05010 // LOC_Os11g01140 // LOC_Os07g48260 // LOC_Os03g08460 // LOC_Os12g29330 // LOC_Os04g46250 // LOC_Os06g36000 // LOC_Os06g46270 // LOC_Os05g10620 // LOC_Os05g48590 // LOC_Os01g19694 // LOC_Os06g44010 // LOC_Os02g13710 // …
GO:0019219	P	regulation of nucleobase, nucleoside, nucleotide and nucleic acid metabolic process	171	1247	1582	24460	5.9e-19	4.2e-17	// LOC_Os07g48450 // LOC_Os05g04210 // LOC_Os01g64790 // LOC_Os01g09120 // LOC_Os04g57720 // LOC_Os08g38210 // LOC_Os06g17480 // LOC_Os01g68370 // LOC_Os05g37080 // LOC_Os07g05010 // LOC_Os11g01140 // LOC_Os07g48260 // LOC_Os03g08460 // LOC_Os12g29330 // LOC_Os04g46250 // LOC_Os06g36000 // LOC_Os06g46270 // LOC_Os05g10620 // LOC_Os05g48590 // LOC_Os01g19694 // LOC_Os06g44010 // LOC_Os02g13710 // …
GO:0051171	P	regulation of nitrogen compound metabolic process	171	1247	1582	24460	5.9e-19	4.2e-17	// LOC_Os07g48450 // LOC_Os05g04210 // LOC_Os01g64790 // LOC_Os01g09120 // LOC_Os04g57720 // LOC_Os08g38210 // LOC_Os06g17480 // LOC_Os01g68370 // LOC_Os05g37080 // LOC_Os07g05010 // LOC_Os11g01140 // LOC_Os07g48260 // LOC_Os03g08460 // LOC_Os12g29330 // LOC_Os04g46250 // LOC_Os06g36000 // LOC_Os06g46270 // LOC_Os05g10620 // LOC_Os05g48590 // LOC_Os01g19694 // LOC_Os06g44010 // LOC_Os02g13710 // …
GO:0009889	P	regulation of biosynthetic process	171	1247	1616	24460	4e-18	1.4e-16	// LOC_Os07g48450 // LOC_Os05g04210 // LOC_Os01g64790 // LOC_Os01g09120 // LOC_Os04g57720 // LOC_Os08g38210 // LOC_Os06g17480 // LOC_Os01g68370 // LOC_Os05g37080 // LOC_Os07g05010 // LOC_Os11g01140 // LOC_Os07g48260 // LOC_Os03g08460 // LOC_Os12g29330 // LOC_Os04g46250 // LOC_Os06g36000 // LOC_Os06g46270 // LOC_Os05g10620 // LOC_Os05g48590 // LOC_Os01g19694 // LOC_Os06g44010 // LOC_Os02g13710 // …
GO:0010556	P	regulation of macromolecule biosynthetic process	171	1247	1616	24460	4e-18	1.4e-16	// LOC_Os07g48450 // LOC_Os05g04210 // LOC_Os01g64790 // LOC_Os01g09120 // LOC_Os04g57720 // LOC_Os08g38210 // LOC_Os06g17480 // LOC_Os01g68370 // LOC_Os05g37080 // LOC_Os07g05010 // LOC_Os11g01140 // LOC_Os07g48260 // LOC_Os03g08460 // LOC_Os12g29330 // LOC_Os04g46250 // LOC_Os06g36000 // LOC_Os06g46270 // LOC_Os05g10620 // LOC_Os05g48590 // LOC_Os01g19694 // LOC_Os06g44010 // LOC_Os02g13710 // …
GO:0031326	P	regulation of cellular biosynthetic process	171	1247	1616	24460	4e-18	1.4e-16	// LOC_Os07g48450 // LOC_Os05g04210 // LOC_Os01g64790 // LOC_Os01g09120 // LOC_Os04g57720 // LOC_Os08g38210 // LOC_Os06g17480 // LOC_Os01g68370 // LOC_Os05g37080 // LOC_Os07g05010 // LOC_Os11g01140 // LOC_Os07g48260 // LOC_Os03g08460 // LOC_Os12g29330 // LOC_Os04g46250 // LOC_Os06g36000 // LOC_Os06g46270 // LOC_Os05g10620 // LOC_Os05g48590 // LOC_Os01g19694 // LOC_Os06g44010 // LOC_Os02g13710 // …
GO:0031323	P	regulation of cellular metabolic process	171	1247	1639	24460	1.4e-17	3.7e-16	// LOC_Os07g48450 // LOC_Os05g04210 // LOC_Os01g64790 // LOC_Os01g09120 // LOC_Os04g57720 // LOC_Os08g38210 // LOC_Os06g17480 // LOC_Os01g68370 // LOC_Os05g37080 // LOC_Os07g05010 // LOC_Os11g01140 // LOC_Os07g48260 // LOC_Os03g08460 // LOC_Os12g29330 // LOC_Os04g46250 // LOC_Os06g36000 // LOC_Os06g46270 // LOC_Os05g10620 // LOC_Os05g48590 // LOC_Os01g19694 // LOC_Os06g44010 // LOC_Os02g13710 // …
GO:0010468	P	regulation of gene expression	171	1247	1638	24460	1.3e-17	3.7e-16	// LOC_Os07g48450 // LOC_Os05g04210 // LOC_Os01g64790 // LOC_Os01g09120 // LOC_Os04g57720 // LOC_Os08g38210 // LOC_Os06g17480 // LOC_Os01g68370 // LOC_Os05g37080 // LOC_Os07g05010 // LOC_Os11g01140 // LOC_Os07g48260 // LOC_Os03g08460 // LOC_Os12g29330 // LOC_Os04g46250 // LOC_Os06g36000 // LOC_Os06g46270 // LOC_Os05g10620 // LOC_Os05g48590 // LOC_Os01g19694 // LOC_Os06g44010 // LOC_Os02g13710 // …
GO:0080090	P	regulation of primary metabolic process	172	1247	1673	24460	4e-17	9.4e-16	// LOC_Os07g48450 // LOC_Os05g04210 // LOC_Os01g64790 // LOC_Os01g09120 // LOC_Os04g57720 // LOC_Os08g38210 // LOC_Os06g17480 // LOC_Os01g68370 // LOC_Os05g37080 // LOC_Os07g05010 // LOC_Os11g01140 // LOC_Os07g48260 // LOC_Os03g08460 // LOC_Os12g29330 // LOC_Os04g46250 // LOC_Os06g36000 // LOC_Os06g46270 // LOC_Os05g10620 // LOC_Os05g48590 // LOC_Os01g19694 // LOC_Os06g44010 // LOC_Os02g13710 // …
GO:0006979	P	response to oxidative stress	48	1247	194	24460	5.5e-17	1.2e-15	// LOC_Os06g32990 // LOC_Os08g42030 // LOC_Os04g59190 // LOC_Os07g47990 // LOC_Os01g57730 // LOC_Os07g49360 // LOC_Os04g59210 // LOC_Os01g16450 // LOC_Os05g04410 // LOC_Os07g48010 // LOC_Os05g04470 // LOC_Os07g48030 // LOC_Os07g01410 // LOC_Os03g25280 // LOC_Os07g44550 // LOC_Os04g59150 // LOC_Os03g25320 // LOC_Os06g33080 // LOC_Os07g48020 // LOC_Os06g32960 // LOC_Os03g25300 // LOC_Os07g34710 // …
GO:0060255	P	regulation of macromolecule metabolic process	172	1247	1697	24460	1.4e-16	2.6e-15	// LOC_Os07g48450 // LOC_Os05g04210 // LOC_Os01g64790 // LOC_Os01g09120 // LOC_Os04g57720 // LOC_Os08g38210 // LOC_Os06g17480 // LOC_Os01g68370 // LOC_Os05g37080 // LOC_Os07g05010 // LOC_Os11g01140 // LOC_Os07g48260 // LOC_Os03g08460 // LOC_Os12g29330 // LOC_Os04g46250 // LOC_Os06g36000 // LOC_Os06g46270 // LOC_Os05g10620 // LOC_Os05g48590 // LOC_Os01g19694 // LOC_Os06g44010 // LOC_Os02g13710 // …
GO:0006350	P	transcription	172	1247	1698	24460	1.4e-16	2.6e-15	// LOC_Os07g48450 // LOC_Os05g04210 // LOC_Os01g64790 // LOC_Os01g09120 // LOC_Os04g57720 // LOC_Os08g38210 // LOC_Os06g17480 // LOC_Os01g68370 // LOC_Os05g37080 // LOC_Os07g05010 // LOC_Os11g01140 // LOC_Os07g48260 // LOC_Os03g08460 // LOC_Os12g29330 // LOC_Os01g33810 // LOC_Os04g46250 // LOC_Os06g36000 // LOC_Os06g46270 // LOC_Os05g10620 // LOC_Os05g48590 // LOC_Os01g19694 // LOC_Os06g44010 // …
GO:0019222	P	regulation of metabolic process	172	1247	1715	24460	3.4e-16	5.5e-15	// LOC_Os07g48450 // LOC_Os05g04210 // LOC_Os01g64790 // LOC_Os01g09120 // LOC_Os04g57720 // LOC_Os08g38210 // LOC_Os06g17480 // LOC_Os01g68370 // LOC_Os05g37080 // LOC_Os07g05010 // LOC_Os11g01140 // LOC_Os07g48260 // LOC_Os03g08460 // LOC_Os12g29330 // LOC_Os04g46250 // LOC_Os06g36000 // LOC_Os06g46270 // LOC_Os05g10620 // LOC_Os05g48590 // LOC_Os01g19694 // LOC_Os06g44010 // LOC_Os02g13710 // …
GO:0050794	P	regulation of cellular process	185	1247	1983	24460	1.4e-14	2e-13	// LOC_Os07g48450 // LOC_Os02g36350 // LOC_Os05g04210 // LOC_Os01g64790 // LOC_Os01g09120 // LOC_Os01g47760 // LOC_Os08g38210 // LOC_Os06g17480 // LOC_Os01g68370 // LOC_Os05g37080 // LOC_Os07g05010 // LOC_Os11g01140 // LOC_Os07g48260 // LOC_Os07g47790 // LOC_Os03g08460 // LOC_Os12g29330 // LOC_Os12g35330 // LOC_Os04g46250 // LOC_Os06g36000 // LOC_Os12g40730 // LOC_Os06g46270 // LOC_Os05g10620 // …
GO:0042221	P	response to chemical stimulus	54	1247	308	24460	1.9e-13	2.7e-12	// LOC_Os06g32990 // LOC_Os08g42030 // LOC_Os04g59190 // LOC_Os09g18530 // LOC_Os07g47990 // LOC_Os01g57730 // LOC_Os07g49360 // LOC_Os04g59210 // LOC_Os01g16450 // LOC_Os05g04410 // LOC_Os07g48010 // LOC_Os05g04470 // LOC_Os07g48030 // LOC_Os07g01410 // LOC_Os10g20470 // LOC_Os07g44550 // LOC_Os04g59150 // LOC_Os03g25320 // LOC_Os06g33080 // LOC_Os07g48020 // LOC_Os06g32960 // LOC_Os03g25300 // …
GO:0050789	P	regulation of biological process	186	1247	2081	24460	4.3e-13	5.7e-12	// LOC_Os07g48450 // LOC_Os02g36350 // LOC_Os05g04210 // LOC_Os01g64790 // LOC_Os01g09120 // LOC_Os01g47760 // LOC_Os08g38210 // LOC_Os06g17480 // LOC_Os01g68370 // LOC_Os05g37080 // LOC_Os07g05010 // LOC_Os11g01140 // LOC_Os07g48260 // LOC_Os07g47790 // LOC_Os03g08460 // LOC_Os12g29330 // LOC_Os12g35330 // LOC_Os04g46250 // LOC_Os06g36000 // LOC_Os12g40730 // LOC_Os06g46270 // LOC_Os05g10620 // …
GO:0006468	P	protein amino acid phosphorylation	150	1247	1584	24460	2.2e-12	2.7e-11	// LOC_Os05g40770 // LOC_Os03g17700 // LOC_Os04g52840 // LOC_Os12g14699 // LOC_Os11g03840 // LOC_Os08g40280 // LOC_Os02g48210 // LOC_Os02g05980 // LOC_Os03g12470 // LOC_Os09g18530 // LOC_Os11g01140 // LOC_Os07g35300 // LOC_Os12g10740 // LOC_Os11g36150 // LOC_Os02g02600 // LOC_Os07g35004 // LOC_Os11g36090 // LOC_Os08g40270 // LOC_Os02g01800 // LOC_Os08g03020 // LOC_Os01g04580 // LOC_Os11g39490 // …
GO:0065007	P	biological regulation	189	1247	2175	24460	2.8e-12	3.3e-11	// LOC_Os07g48450 // LOC_Os02g36350 // LOC_Os05g04210 // LOC_Os01g64790 // LOC_Os01g09120 // LOC_Os01g47760 // LOC_Os08g38210 // LOC_Os06g17480 // LOC_Os01g68370 // LOC_Os05g37080 // LOC_Os07g05010 // LOC_Os11g01140 // LOC_Os07g48260 // LOC_Os07g47790 // LOC_Os03g08460 // LOC_Os12g29330 // LOC_Os12g35330 // LOC_Os04g46250 // LOC_Os06g36000 // LOC_Os12g40730 // LOC_Os06g46270 // LOC_Os05g10620 // …
GO:0006464	P	protein modification process	177	1247	1997	24460	3.4e-12	3.8e-11	// LOC_Os04g35270 // LOC_Os02g08364 // LOC_Os09g27950 // LOC_Os03g17700 // LOC_Os04g52840 // LOC_Os12g14699 // LOC_Os05g40770 // LOC_Os08g40280 // LOC_Os02g48210 // LOC_Os02g05980 // LOC_Os03g12470 // LOC_Os09g18530 // LOC_Os11g01140 // LOC_Os07g35300 // LOC_Os12g10740 // LOC_Os03g10950 // LOC_Os11g36150 // LOC_Os02g02600 // LOC_Os07g35004 // LOC_Os11g36090 // LOC_Os08g40270 // LOC_Os02g01800 // …
GO:0043687	P	post-translational protein modification	164	1247	1818	24460	6.8e-12	7.2e-11	// LOC_Os05g40770 // LOC_Os02g08364 // LOC_Os03g17700 // LOC_Os04g52840 // LOC_Os12g14699 // LOC_Os11g03840 // LOC_Os08g40280 // LOC_Os02g48210 // LOC_Os02g05980 // LOC_Os03g12470 // LOC_Os09g18530 // LOC_Os11g01140 // LOC_Os07g35300 // LOC_Os12g10740 // LOC_Os03g10950 // LOC_Os11g36150 // LOC_Os02g02600 // LOC_Os07g35004 // LOC_Os11g36090 // LOC_Os08g40270 // LOC_Os02g01800 // LOC_Os08g03020 // …
GO:0043412	P	macromolecule modification	177	1247	2046	24460	2.2e-11	2.2e-10	// LOC_Os04g35270 // LOC_Os02g08364 // LOC_Os09g27950 // LOC_Os03g17700 // LOC_Os04g52840 // LOC_Os12g14699 // LOC_Os05g40770 // LOC_Os08g40280 // LOC_Os02g48210 // LOC_Os02g05980 // LOC_Os03g12470 // LOC_Os09g18530 // LOC_Os11g01140 // LOC_Os07g35300 // LOC_Os12g10740 // LOC_Os03g10950 // LOC_Os11g36150 // LOC_Os02g02600 // LOC_Os07g35004 // LOC_Os11g36090 // LOC_Os08g40270 // LOC_Os02g01800 // …
GO:0016310	P	phosphorylation	154	1247	1761	24460	2.6e-10	2.5e-09	// LOC_Os05g40770 // LOC_Os03g17700 // LOC_Os04g52840 // LOC_Os12g14699 // LOC_Os11g03840 // LOC_Os08g40280 // LOC_Os02g48210 // LOC_Os02g05980 // LOC_Os03g12470 // LOC_Os09g18530 // LOC_Os11g01140 // LOC_Os07g35300 // LOC_Os12g10740 // LOC_Os11g36150 // LOC_Os02g02600 // LOC_Os07g35004 // LOC_Os11g36090 // LOC_Os08g40270 // LOC_Os02g01800 // LOC_Os08g03020 // LOC_Os01g04580 // LOC_Os11g39490 // …
GO:0005975	P	carbohydrate metabolic process	92	1247	864	24460	2.8e-10	2.6e-09	// LOC_Os02g33110 // LOC_Os04g35270 // LOC_Os09g27950 // LOC_Os04g09390 // LOC_Os06g36560 // LOC_Os01g65460 // LOC_Os07g41150 // LOC_Os04g41970 // LOC_Os07g23944 // LOC_Os07g35480 // LOC_Os04g39880 // LOC_Os01g71860 // LOC_Os08g25720 // LOC_Os02g37590 // LOC_Os04g51460 // LOC_Os11g47820 // LOC_Os08g40690 // LOC_Os11g07960 // LOC_Os08g34580 // LOC_Os11g47550 // LOC_Os11g33270 // LOC_Os04g40990 // …
GO:0006796	P	phosphate metabolic process	159	1247	1879	24460	1.2e-09	9.9e-09	// LOC_Os05g40770 // LOC_Os02g08364 // LOC_Os03g17700 // LOC_Os04g52840 // LOC_Os12g14699 // LOC_Os11g03840 // LOC_Os08g40280 // LOC_Os02g48210 // LOC_Os02g05980 // LOC_Os03g12470 // LOC_Os09g18530 // LOC_Os11g01140 // LOC_Os07g35300 // LOC_Os12g10740 // LOC_Os03g10950 // LOC_Os11g36150 // LOC_Os02g02600 // LOC_Os07g35004 // LOC_Os11g36090 // LOC_Os08g40270 // LOC_Os02g01800 // LOC_Os08g03020 // …
GO:0006793	P	phosphorus metabolic process	159	1247	1879	24460	1.2e-09	9.9e-09	// LOC_Os05g40770 // LOC_Os02g08364 // LOC_Os03g17700 // LOC_Os04g52840 // LOC_Os12g14699 // LOC_Os11g03840 // LOC_Os08g40280 // LOC_Os02g48210 // LOC_Os02g05980 // LOC_Os03g12470 // LOC_Os09g18530 // LOC_Os11g01140 // LOC_Os07g35300 // LOC_Os12g10740 // LOC_Os03g10950 // LOC_Os11g36150 // LOC_Os02g02600 // LOC_Os07g35004 // LOC_Os11g36090 // LOC_Os08g40270 // LOC_Os02g01800 // LOC_Os08g03020 // …
GO:0050896	P	response to stimulus	99	1247	1022	24460	5.7e-09	4.7e-08	// LOC_Os06g32990 // LOC_Os07g09900 // LOC_Os03g18600 // LOC_Os11g37870 // LOC_Os03g25300 // LOC_Os01g33810 // LOC_Os01g19820 // LOC_Os06g48000 // LOC_Os11g02610 // LOC_Os05g48040 // LOC_Os01g31980 // LOC_Os12g02080 // LOC_Os07g33740 // LOC_Os05g07810 // LOC_Os12g32790 // LOC_Os01g22249 // LOC_Os03g25330 // LOC_Os04g59160 // LOC_Os06g48010 // LOC_Os08g42030 // LOC_Os05g04470 // LOC_Os10g07400 // …
GO:0006950	P	response to stress	89	1247	883	24460	6.4e-09	5e-08	// LOC_Os06g32990 // LOC_Os07g09900 // LOC_Os03g18600 // LOC_Os11g37870 // LOC_Os03g25300 // LOC_Os01g33810 // LOC_Os01g19820 // LOC_Os06g48000 // LOC_Os11g11940 // LOC_Os12g02080 // LOC_Os07g33740 // LOC_Os05g07810 // LOC_Os12g32790 // LOC_Os01g22249 // LOC_Os03g25330 // LOC_Os04g59160 // LOC_Os06g48010 // LOC_Os08g42030 // LOC_Os05g04470 // LOC_Os10g07400 // LOC_Os04g01550 // LOC_Os05g28740 // …
GO:0006355	P	regulation of transcription, DNA-dependent	79	1247	806	24460	1.3e-07	1e-06	// LOC_Os01g59350 // LOC_Os09g35910 // LOC_Os08g43210 // LOC_Os01g64790 // LOC_Os01g63510 // LOC_Os01g04750 // LOC_Os01g10370 // LOC_Os01g21120 // LOC_Os01g09120 // LOC_Os12g44300 // LOC_Os06g10780 // LOC_Os04g57720 // LOC_Os01g60270 // LOC_Os08g36700 // LOC_Os03g10210 // LOC_Os01g54890 // LOC_Os03g21800 // LOC_Os03g51690 // LOC_Os06g17480 // LOC_Os02g43790 // LOC_Os01g68370 // LOC_Os10g41330 // …
GO:0051252	P	regulation of RNA metabolic process	79	1247	809	24460	1.6e-07	1.1e-06	// LOC_Os01g59350 // LOC_Os09g35910 // LOC_Os08g43210 // LOC_Os01g64790 // LOC_Os01g63510 // LOC_Os01g04750 // LOC_Os01g10370 // LOC_Os01g21120 // LOC_Os01g09120 // LOC_Os12g44300 // LOC_Os06g10780 // LOC_Os04g57720 // LOC_Os01g60270 // LOC_Os08g36700 // LOC_Os03g10210 // LOC_Os01g54890 // LOC_Os03g21800 // LOC_Os03g51690 // LOC_Os06g17480 // LOC_Os02g43790 // LOC_Os01g68370 // LOC_Os10g41330 // …
GO:0044262	P	cellular carbohydrate metabolic process	46	1247	379	24460	3.4e-07	2.4e-06	// LOC_Os11g30760 // LOC_Os07g36740 // LOC_Os04g35270 // LOC_Os09g30120 // LOC_Os04g40990 // LOC_Os01g52250 // LOC_Os02g07260 // LOC_Os02g44230 // LOC_Os03g20420 // LOC_Os03g22120 // LOC_Os09g26310 // LOC_Os06g45710 // LOC_Os06g36560 // LOC_Os05g10650 // LOC_Os02g38840 // LOC_Os04g51880 // LOC_Os09g27950 // LOC_Os07g41150 // LOC_Os10g39840 // LOC_Os10g13700 // LOC_Os07g43160 // LOC_Os08g31980 // …
GO:0006351	P	transcription, DNA-dependent	79	1247	855	24460	1.2e-06	7.9e-06	// LOC_Os01g59350 // LOC_Os09g35910 // LOC_Os08g43210 // LOC_Os01g64790 // LOC_Os01g63510 // LOC_Os01g04750 // LOC_Os01g10370 // LOC_Os01g21120 // LOC_Os01g09120 // LOC_Os12g44300 // LOC_Os06g10780 // LOC_Os04g57720 // LOC_Os01g60270 // LOC_Os08g36700 // LOC_Os03g10210 // LOC_Os01g54890 // LOC_Os03g21800 // LOC_Os03g51690 // LOC_Os06g17480 // LOC_Os02g43790 // LOC_Os01g68370 // LOC_Os10g41330 // …
GO:0032774	P	RNA biosynthetic process	79	1247	857	24460	1.3e-06	8.3e-06	// LOC_Os01g59350 // LOC_Os09g35910 // LOC_Os08g43210 // LOC_Os01g64790 // LOC_Os01g63510 // LOC_Os01g04750 // LOC_Os01g10370 // LOC_Os01g21120 // LOC_Os01g09120 // LOC_Os12g44300 // LOC_Os06g10780 // LOC_Os04g57720 // LOC_Os01g60270 // LOC_Os08g36700 // LOC_Os03g10210 // LOC_Os01g54890 // LOC_Os03g21800 // LOC_Os03g51690 // LOC_Os06g17480 // LOC_Os02g43790 // LOC_Os01g68370 // LOC_Os10g41330 // …
GO:0010876	P	lipid localization	20	1247	104	24460	2.2e-06	1.4e-05	// LOC_Os10g40520 // LOC_Os06g43600 // LOC_Os04g46830 // LOC_Os10g40510 // LOC_Os02g44310 // LOC_Os08g01710 // LOC_Os03g01320 // LOC_Os10g40614 // LOC_Os10g40480 // LOC_Os04g52260 // LOC_Os03g20949 // LOC_Os12g02290 // LOC_Os10g40440 // LOC_Os03g07100 // LOC_Os10g40430 // LOC_Os10g40470 // LOC_Os05g01030 // LOC_Os06g07220 // LOC_Os11g02389 // LOC_Os10g40530
GO:0006869	P	lipid transport	20	1247	104	24460	2.2e-06	1.4e-05	// LOC_Os10g40520 // LOC_Os06g43600 // LOC_Os04g46830 // LOC_Os10g40510 // LOC_Os02g44310 // LOC_Os08g01710 // LOC_Os03g01320 // LOC_Os10g40614 // LOC_Os10g40480 // LOC_Os04g52260 // LOC_Os03g20949 // LOC_Os12g02290 // LOC_Os10g40440 // LOC_Os03g07100 // LOC_Os10g40430 // LOC_Os10g40470 // LOC_Os05g01030 // LOC_Os06g07220 // LOC_Os11g02389 // LOC_Os10g40530
GO:0010467	P	gene expression	184	1247	2581	24460	4.7e-06	2.8e-05	// LOC_Os07g48450 // LOC_Os05g04210 // LOC_Os01g64790 // LOC_Os01g09120 // LOC_Os04g57720 // LOC_Os08g38210 // LOC_Os06g17480 // LOC_Os01g68370 // LOC_Os05g37080 // LOC_Os07g05010 // LOC_Os11g01140 // LOC_Os07g48260 // LOC_Os03g08460 // LOC_Os12g29330 // LOC_Os01g33810 // LOC_Os04g46250 // LOC_Os06g36000 // LOC_Os06g06130 // LOC_Os06g46270 // LOC_Os05g10620 // LOC_Os05g48590 // LOC_Os01g19694 // …
GO:0006096	P	glycolysis	14	1247	74	24460	8.3e-05	0.00049	// LOC_Os12g05110 // LOC_Os01g16960 // LOC_Os08g02700 // LOC_Os05g10650 // LOC_Os01g67860 // LOC_Os06g13810 // LOC_Os06g01590 // LOC_Os04g58110 // LOC_Os05g44922 // LOC_Os08g25720 // LOC_Os10g08550 // LOC_Os11g05110 // LOC_Os02g07260 // LOC_Os06g45710
GO:0006006	P	glucose metabolic process	17	1247	112	24460	0.00017	0.00098	// LOC_Os12g05110 // LOC_Os01g16960 // LOC_Os02g38920 // LOC_Os06g01590 // LOC_Os05g10650 // LOC_Os01g67860 // LOC_Os06g13810 // LOC_Os11g05110 // LOC_Os04g58110 // LOC_Os10g13700 // LOC_Os05g44922 // LOC_Os08g25720 // LOC_Os10g08550 // LOC_Os08g02700 // LOC_Os02g38840 // LOC_Os02g07260 // LOC_Os06g45710
GO:0044282	P	small molecule catabolic process	19	1247	143	24460	0.00034	0.0019	// LOC_Os12g05110 // LOC_Os01g16960 // LOC_Os01g67030 // LOC_Os02g41650 // LOC_Os05g10650 // LOC_Os01g67860 // LOC_Os06g13810 // LOC_Os02g41670 // LOC_Os11g05110 // LOC_Os06g01590 // LOC_Os04g58110 // LOC_Os06g36560 // LOC_Os05g44922 // LOC_Os06g45670 // LOC_Os08g25720 // LOC_Os10g08550 // LOC_Os08g02700 // LOC_Os02g07260 // LOC_Os06g45710
GO:0044275	P	cellular carbohydrate catabolic process	15	1247	98	24460	0.00037	0.002	// LOC_Os12g05110 // LOC_Os01g16960 // LOC_Os06g01590 // LOC_Os05g10650 // LOC_Os01g67860 // LOC_Os06g13810 // LOC_Os11g05110 // LOC_Os04g58110 // LOC_Os06g36560 // LOC_Os05g44922 // LOC_Os08g25720 // LOC_Os10g08550 // LOC_Os08g02700 // LOC_Os02g07260 // LOC_Os06g45710
GO:0046164	P	alcohol catabolic process	15	1247	98	24460	0.00037	0.002	// LOC_Os12g05110 // LOC_Os01g16960 // LOC_Os06g01590 // LOC_Os05g10650 // LOC_Os01g67860 // LOC_Os06g13810 // LOC_Os11g05110 // LOC_Os04g58110 // LOC_Os06g36560 // LOC_Os05g44922 // LOC_Os08g25720 // LOC_Os10g08550 // LOC_Os08g02700 // LOC_Os02g07260 // LOC_Os06g45710
GO:0019318	P	hexose metabolic process	18	1247	134	24460	0.00043	0.0022	// LOC_Os12g05110 // LOC_Os01g16960 // LOC_Os02g38920 // LOC_Os06g01590 // LOC_Os05g10650 // LOC_Os01g67860 // LOC_Os06g13810 // LOC_Os04g51880 // LOC_Os11g05110 // LOC_Os04g58110 // LOC_Os10g13700 // LOC_Os05g44922 // LOC_Os08g25720 // LOC_Os10g08550 // LOC_Os08g02700 // LOC_Os02g38840 // LOC_Os02g07260 // LOC_Os06g45710
GO:0016052	P	carbohydrate catabolic process	18	1247	135	24460	0.00046	0.0023	// LOC_Os12g05110 // LOC_Os11g37940 // LOC_Os06g01590 // LOC_Os05g44922 // LOC_Os05g10650 // LOC_Os01g16960 // LOC_Os01g67860 // LOC_Os08g02700 // LOC_Os11g05110 // LOC_Os04g58110 // LOC_Os06g36560 // LOC_Os02g39330 // LOC_Os08g25720 // LOC_Os10g08550 // LOC_Os06g13810 // LOC_Os02g07260 // LOC_Os06g45710 // LOC_Os04g09390
GO:0006066	P	alcohol metabolic process	23	1247	199	24460	0.00052	0.0026	// LOC_Os06g01590 // LOC_Os02g07260 // LOC_Os03g20420 // LOC_Os06g45710 // LOC_Os10g13700 // LOC_Os05g10650 // LOC_Os02g38840 // LOC_Os04g51880 // LOC_Os07g41150 // LOC_Os06g36560 // LOC_Os05g44922 // LOC_Os10g08550 // LOC_Os01g16960 // LOC_Os12g05110 // LOC_Os02g38920 // LOC_Os01g67860 // LOC_Os06g13810 // LOC_Os04g58110 // LOC_Os08g25720 // LOC_Os02g37590 // LOC_Os08g02700 // LOC_Os11g05110 // …
GO:0019320	P	hexose catabolic process	14	1247	92	24460	0.00061	0.0028	// LOC_Os12g05110 // LOC_Os01g16960 // LOC_Os08g02700 // LOC_Os05g10650 // LOC_Os01g67860 // LOC_Os06g13810 // LOC_Os06g01590 // LOC_Os04g58110 // LOC_Os05g44922 // LOC_Os08g25720 // LOC_Os10g08550 // LOC_Os11g05110 // LOC_Os02g07260 // LOC_Os06g45710
GO:0006007	P	glucose catabolic process	14	1247	92	24460	0.00061	0.0028	// LOC_Os12g05110 // LOC_Os01g16960 // LOC_Os08g02700 // LOC_Os05g10650 // LOC_Os01g67860 // LOC_Os06g13810 // LOC_Os06g01590 // LOC_Os04g58110 // LOC_Os05g44922 // LOC_Os08g25720 // LOC_Os10g08550 // LOC_Os11g05110 // LOC_Os02g07260 // LOC_Os06g45710
GO:0046365	P	monosaccharide catabolic process	14	1247	92	24460	0.00061	0.0028	// LOC_Os12g05110 // LOC_Os01g16960 // LOC_Os08g02700 // LOC_Os05g10650 // LOC_Os01g67860 // LOC_Os06g13810 // LOC_Os06g01590 // LOC_Os04g58110 // LOC_Os05g44922 // LOC_Os08g25720 // LOC_Os10g08550 // LOC_Os11g05110 // LOC_Os02g07260 // LOC_Os06g45710
GO:0005996	P	monosaccharide metabolic process	19	1247	151	24460	0.00062	0.0028	// LOC_Os12g05110 // LOC_Os01g16960 // LOC_Os02g38920 // LOC_Os06g01590 // LOC_Os05g10650 // LOC_Os01g67860 // LOC_Os06g13810 // LOC_Os04g51880 // LOC_Os11g05110 // LOC_Os04g58110 // LOC_Os10g13700 // LOC_Os05g44922 // LOC_Os03g20420 // LOC_Os08g25720 // LOC_Os10g08550 // LOC_Os08g02700 // LOC_Os02g38840 // LOC_Os02g07260 // LOC_Os06g45710
GO:0044267	P	cellular protein metabolic process	191	1247	2983	24460	0.00085	0.0037	// LOC_Os04g35270 // LOC_Os02g08364 // LOC_Os09g27950 // LOC_Os03g17700 // LOC_Os04g52840 // LOC_Os12g14699 // LOC_Os05g40770 // LOC_Os08g40280 // LOC_Os02g48210 // LOC_Os02g05980 // LOC_Os03g12470 // LOC_Os09g18530 // LOC_Os11g01140 // LOC_Os07g35300 // LOC_Os12g10740 // LOC_Os03g10950 // LOC_Os11g36150 // LOC_Os02g02600 // LOC_Os07g35004 // LOC_Os11g36090 // LOC_Os08g40270 // LOC_Os02g01800 // …
GO:0005984	P	disaccharide metabolic process	9	1247	44	24460	0.00093	0.0039	// LOC_Os09g20990 // LOC_Os02g44230 // LOC_Os03g22120 // LOC_Os03g26910 // LOC_Os06g09450 // LOC_Os07g43160 // LOC_Os08g31980 // LOC_Os05g44210 // LOC_Os08g34580
GO:0016137	P	glycoside metabolic process	9	1247	44	24460	0.00093	0.0039	// LOC_Os09g20990 // LOC_Os02g44230 // LOC_Os03g22120 // LOC_Os03g26910 // LOC_Os06g09450 // LOC_Os07g43160 // LOC_Os08g31980 // LOC_Os05g44210 // LOC_Os08g34580
GO:0016070	P	RNA metabolic process	86	1247	1180	24460	0.001	0.0042	// LOC_Os01g64790 // LOC_Os01g09120 // LOC_Os04g57720 // LOC_Os06g17480 // LOC_Os01g68370 // LOC_Os09g35910 // LOC_Os03g51690 // LOC_Os03g08460 // LOC_Os04g46250 // LOC_Os06g36000 // LOC_Os06g06130 // LOC_Os01g04800 // LOC_Os01g19694 // LOC_Os02g13710 // LOC_Os02g58210 // LOC_Os10g23090 // LOC_Os01g04750 // LOC_Os01g10370 // LOC_Os01g21120 // LOC_Os12g44300 // LOC_Os08g36700 // LOC_Os02g43790 // …
GO:0042545	P	cell wall modification	9	1247	45	24460	0.0011	0.0043	// LOC_Os01g20980 // LOC_Os03g19610 // LOC_Os09g37360 // LOC_Os11g45730 // LOC_Os09g39760 // LOC_Os10g26680 // LOC_Os02g18650 // LOC_Os08g34910 // LOC_Os08g34900
GO:0071554	P	cell wall organization or biogenesis	18	1247	146	24460	0.0011	0.0043	// LOC_Os11g37940 // LOC_Os09g28460 // LOC_Os02g39330 // LOC_Os01g20980 // LOC_Os06g10930 // LOC_Os03g19610 // LOC_Os09g37360 // LOC_Os08g34910 // LOC_Os01g60770 // LOC_Os05g39990 // LOC_Os11g45730 // LOC_Os09g39760 // LOC_Os10g26680 // LOC_Os02g18650 // LOC_Os11g35330 // LOC_Os02g17534 // LOC_Os08g34900 // LOC_Os04g09390
GO:0009311	P	oligosaccharide metabolic process	9	1247	46	24460	0.0012	0.0048	// LOC_Os09g20990 // LOC_Os02g44230 // LOC_Os03g22120 // LOC_Os03g26910 // LOC_Os06g09450 // LOC_Os07g43160 // LOC_Os08g31980 // LOC_Os05g44210 // LOC_Os08g34580
GO:0005992	P	trehalose biosynthetic process	7	1247	28	24460	0.0013	0.0049	// LOC_Os09g20990 // LOC_Os02g44230 // LOC_Os03g26910 // LOC_Os07g43160 // LOC_Os08g31980 // LOC_Os05g44210 // LOC_Os08g34580
GO:0005991	P	trehalose metabolic process	7	1247	29	24460	0.0015	0.0057	// LOC_Os09g20990 // LOC_Os02g44230 // LOC_Os03g26910 // LOC_Os07g43160 // LOC_Os08g31980 // LOC_Os05g44210 // LOC_Os08g34580
GO:0016138	P	glycoside biosynthetic process	7	1247	31	24460	0.0021	0.0076	// LOC_Os09g20990 // LOC_Os02g44230 // LOC_Os03g26910 // LOC_Os07g43160 // LOC_Os08g31980 // LOC_Os05g44210 // LOC_Os08g34580
GO:0046351	P	disaccharide biosynthetic process	7	1247	31	24460	0.0021	0.0076	// LOC_Os09g20990 // LOC_Os02g44230 // LOC_Os03g26910 // LOC_Os07g43160 // LOC_Os08g31980 // LOC_Os05g44210 // LOC_Os08g34580
GO:0009312	P	oligosaccharide biosynthetic process	7	1247	32	24460	0.0024	0.0088	// LOC_Os09g20990 // LOC_Os02g44230 // LOC_Os03g26910 // LOC_Os07g43160 // LOC_Os08g31980 // LOC_Os05g44210 // LOC_Os08g34580
GO:0009607	P	response to biotic stimulus	5	1247	18	24460	0.0043	0.015	// LOC_Os03g18600 // LOC_Os11g37940 // LOC_Os12g36850 // LOC_Os12g36830 // LOC_Os03g18850
GO:0071555	P	cell wall organization	11	1247	82	24460	0.0053	0.019	// LOC_Os01g20980 // LOC_Os03g19610 // LOC_Os09g37360 // LOC_Os11g45730 // LOC_Os01g60770 // LOC_Os05g39990 // LOC_Os09g39760 // LOC_Os10g26680 // LOC_Os02g18650 // LOC_Os08g34910 // LOC_Os08g34900
GO:0034637	P	cellular carbohydrate biosynthetic process	13	1247	110	24460	0.0068	0.023	// LOC_Os07g36740 // LOC_Os07g43160 // LOC_Os03g26910 // LOC_Os01g52250 // LOC_Os05g44210 // LOC_Os10g13700 // LOC_Os02g44230 // LOC_Os07g36610 // LOC_Os08g31980 // LOC_Os09g30120 // LOC_Os09g20990 // LOC_Os08g34580 // LOC_Os06g02180
GO:0006865	P	amino acid transport	6	1247	30	24460	0.0072	0.024	// LOC_Os04g35540 // LOC_Os12g42850 // LOC_Os01g11160 // LOC_Os03g43970 // LOC_Os11g05690 // LOC_Os01g42234
GO:0015837	P	amine transport	6	1247	30	24460	0.0072	0.024	// LOC_Os04g35540 // LOC_Os12g42850 // LOC_Os01g11160 // LOC_Os03g43970 // LOC_Os11g05690 // LOC_Os01g42234
GO:0044281	P	small molecule metabolic process	74	1247	1079	24460	0.0087	0.028	// LOC_Os08g10010 // LOC_Os12g09540 // LOC_Os01g55540 // LOC_Os03g06700 // LOC_Os03g12890 // LOC_Os05g35580 // LOC_Os04g40990 // LOC_Os06g36560 // LOC_Os06g01590 // LOC_Os03g56820 // LOC_Os05g01030 // LOC_Os06g45670 // LOC_Os01g67030 // LOC_Os01g08190 // LOC_Os03g06705 // LOC_Os07g39690 // LOC_Os05g12770 // LOC_Os06g45710 // LOC_Os01g65830 // LOC_Os03g53650 // LOC_Os09g34930 // LOC_Os05g41580 // …
GO:0016051	P	carbohydrate biosynthetic process	13	1247	116	24460	0.01	0.032	// LOC_Os07g36740 // LOC_Os07g43160 // LOC_Os03g26910 // LOC_Os01g52250 // LOC_Os05g44210 // LOC_Os10g13700 // LOC_Os02g44230 // LOC_Os07g36610 // LOC_Os08g31980 // LOC_Os09g30120 // LOC_Os09g20990 // LOC_Os08g34580 // LOC_Os06g02180
GO:0015849	P	organic acid transport	6	1247	34	24460	0.012	0.037	// LOC_Os04g35540 // LOC_Os12g42850 // LOC_Os01g11160 // LOC_Os03g43970 // LOC_Os11g05690 // LOC_Os01g42234
GO:0046942	P	carboxylic acid transport	6	1247	34	24460	0.012	0.037	// LOC_Os04g35540 // LOC_Os12g42850 // LOC_Os01g11160 // LOC_Os03g43970 // LOC_Os11g05690 // LOC_Os01g42234
GO:0009116	P	nucleoside metabolic process	7	1247	50	24460	0.02	0.061	// LOC_Os09g31970 // LOC_Os05g35580 // LOC_Os07g30970 // LOC_Os05g13970 // LOC_Os08g40180 // LOC_Os05g06940 // LOC_Os07g42160
GO:0006810	P	transport	103	1247	1639	24460	0.021	0.062	// LOC_Os04g39350 // LOC_Os01g67810 // LOC_Os11g36400 // LOC_Os02g47090 // LOC_Os05g11560 // LOC_Os11g05700 // LOC_Os01g65380 // LOC_Os02g07044 // LOC_Os03g43970 // LOC_Os03g13160 // LOC_Os03g01320 // LOC_Os03g59660 // LOC_Os05g33960 // LOC_Os07g47350 // LOC_Os02g55890 // LOC_Os05g48040 // LOC_Os07g25540 // LOC_Os01g31980 // LOC_Os01g67820 // LOC_Os08g45030 // LOC_Os05g43820 // LOC_Os01g48710 // …
GO:0051234	P	establishment of localization	103	1247	1639	24460	0.021	0.062	// LOC_Os04g39350 // LOC_Os01g67810 // LOC_Os11g36400 // LOC_Os02g47090 // LOC_Os05g11560 // LOC_Os11g05700 // LOC_Os01g65380 // LOC_Os02g07044 // LOC_Os03g43970 // LOC_Os03g13160 // LOC_Os03g01320 // LOC_Os03g59660 // LOC_Os05g33960 // LOC_Os07g47350 // LOC_Os02g55890 // LOC_Os05g48040 // LOC_Os07g25540 // LOC_Os01g31980 // LOC_Os01g67820 // LOC_Os08g45030 // LOC_Os05g43820 // LOC_Os01g48710 // …
GO:0009119	P	ribonucleoside metabolic process	5	1247	28	24460	0.02	0.062	// LOC_Os07g30970 // LOC_Os09g31970 // LOC_Os07g42160 // LOC_Os05g06940 // LOC_Os08g40180
GO:0051179	P	localization	103	1247	1658	24460	0.027	0.079	// LOC_Os04g39350 // LOC_Os01g67810 // LOC_Os11g36400 // LOC_Os02g47090 // LOC_Os05g11560 // LOC_Os11g05700 // LOC_Os01g65380 // LOC_Os02g07044 // LOC_Os03g43970 // LOC_Os03g13160 // LOC_Os03g01320 // LOC_Os03g59660 // LOC_Os05g33960 // LOC_Os07g47350 // LOC_Os02g55890 // LOC_Os05g48040 // LOC_Os07g25540 // LOC_Os01g31980 // LOC_Os01g67820 // LOC_Os08g45030 // LOC_Os05g43820 // LOC_Os01g48710 // …
GO:0006631	P	fatty acid metabolic process	9	1247	81	24460	0.03	0.087	// LOC_Os01g65830 // LOC_Os08g10010 // LOC_Os03g06705 // LOC_Os03g06700 // LOC_Os02g56860 // LOC_Os03g56820 // LOC_Os04g02640 // LOC_Os02g11070 // LOC_Os09g34930
GO:0042180	P	cellular ketone metabolic process	35	1247	496	24460	0.042	0.12	// LOC_Os08g10010 // LOC_Os01g67030 // LOC_Os03g06700 // LOC_Os03g12890 // LOC_Os04g40990 // LOC_Os09g27510 // LOC_Os03g56820 // LOC_Os06g45670 // LOC_Os03g06705 // LOC_Os07g39690 // LOC_Os05g12770 // LOC_Os01g65830 // LOC_Os03g53650 // LOC_Os02g56860 // LOC_Os10g13700 // LOC_Os04g55720 // LOC_Os03g13300 // LOC_Os05g09440 // LOC_Os04g47190 // LOC_Os02g14110 // LOC_Os06g06130 // LOC_Os01g52260 // …
GO:0032787	P	monocarboxylic acid metabolic process	11	1247	115	24460	0.043	0.12	// LOC_Os01g65830 // LOC_Os08g10010 // LOC_Os03g06705 // LOC_Os03g06700 // LOC_Os04g40990 // LOC_Os02g56860 // LOC_Os03g56820 // LOC_Os10g13700 // LOC_Os04g02640 // LOC_Os02g11070 // LOC_Os09g34930
GO:0009069	P	serine family amino acid metabolic process	5	1247	36	24460	0.047	0.13	// LOC_Os03g53650 // LOC_Os04g55720 // LOC_Os06g05690 // LOC_Os01g52260 // LOC_Os06g45670
GO:0030001	P	metal ion transport	18	1247	225	24460	0.05	0.14	// LOC_Os04g39350 // LOC_Os01g48710 // LOC_Os04g32920 // LOC_Os10g30450 // LOC_Os04g39370 // LOC_Os07g47350 // LOC_Os05g41580 // LOC_Os01g56420 // LOC_Os02g37320 // LOC_Os07g20340 // LOC_Os07g26110 // LOC_Os07g48390 // LOC_Os06g48810 // LOC_Os07g48130 // LOC_Os05g25194 // LOC_Os08g31340 // LOC_Os04g52120 // LOC_Os01g74490
GO:0043436	P	oxoacid metabolic process	34	1247	490	24460	0.053	0.14	// LOC_Os08g10010 // LOC_Os03g06705 // LOC_Os03g06700 // LOC_Os03g12890 // LOC_Os04g40990 // LOC_Os09g27510 // LOC_Os03g56820 // LOC_Os06g45670 // LOC_Os01g67030 // LOC_Os07g39690 // LOC_Os05g12770 // LOC_Os01g65830 // LOC_Os03g53650 // LOC_Os02g56860 // LOC_Os10g13700 // LOC_Os04g55720 // LOC_Os03g13300 // LOC_Os05g09440 // LOC_Os04g47190 // LOC_Os02g14110 // LOC_Os06g06130 // LOC_Os01g52260 // …
GO:0019752	P	carboxylic acid metabolic process	34	1247	490	24460	0.053	0.14	// LOC_Os08g10010 // LOC_Os03g06705 // LOC_Os03g06700 // LOC_Os03g12890 // LOC_Os04g40990 // LOC_Os09g27510 // LOC_Os03g56820 // LOC_Os06g45670 // LOC_Os01g67030 // LOC_Os07g39690 // LOC_Os05g12770 // LOC_Os01g65830 // LOC_Os03g53650 // LOC_Os02g56860 // LOC_Os10g13700 // LOC_Os04g55720 // LOC_Os03g13300 // LOC_Os05g09440 // LOC_Os04g47190 // LOC_Os02g14110 // LOC_Os06g06130 // LOC_Os01g52260 // …
GO:0006082	P	organic acid metabolic process	34	1247	491	24460	0.054	0.14	// LOC_Os08g10010 // LOC_Os03g06705 // LOC_Os03g06700 // LOC_Os03g12890 // LOC_Os04g40990 // LOC_Os09g27510 // LOC_Os03g56820 // LOC_Os06g45670 // LOC_Os01g67030 // LOC_Os07g39690 // LOC_Os05g12770 // LOC_Os01g65830 // LOC_Os03g53650 // LOC_Os02g56860 // LOC_Os10g13700 // LOC_Os04g55720 // LOC_Os03g13300 // LOC_Os05g09440 // LOC_Os04g47190 // LOC_Os02g14110 // LOC_Os06g06130 // LOC_Os01g52260 // …
GO:0055114	P	oxidation reduction	20	1247	261	24460	0.057	0.14	// LOC_Os04g52280 // LOC_Os04g28870 // LOC_Os09g20090 // LOC_Os08g36480 // LOC_Os11g33120 // LOC_Os09g32952 // LOC_Os11g10510 // LOC_Os01g65690 // LOC_Os09g23530 // LOC_Os04g27060 // LOC_Os09g32570 // LOC_Os03g08999 // LOC_Os03g56820 // LOC_Os05g09440 // LOC_Os01g24600 // LOC_Os03g12900 // LOC_Os12g35610 // LOC_Os11g10480 // LOC_Os01g42234 // LOC_Os01g24550
GO:0006952	P	defense response	31	1247	442	24460	0.056	0.14	// LOC_Os10g07400 // LOC_Os07g09900 // LOC_Os03g18850 // LOC_Os02g27680 // LOC_Os12g31620 // LOC_Os05g12770 // LOC_Os03g18600 // LOC_Os11g37940 // LOC_Os11g37870 // LOC_Os11g14380 // LOC_Os11g12330 // LOC_Os12g06920 // LOC_Os12g36850 // LOC_Os11g45970 // LOC_Os11g46210 // LOC_Os01g33810 // LOC_Os12g36830 // LOC_Os11g11960 // LOC_Os11g11940 // LOC_Os06g37820 // LOC_Os03g40194 // LOC_Os07g33740 // …
GO:0044248	P	cellular catabolic process	24	1247	326	24460	0.057	0.14	// LOC_Os01g67030 // LOC_Os09g18530 // LOC_Os06g01590 // LOC_Os02g07260 // LOC_Os06g45670 // LOC_Os06g45710 // LOC_Os05g10650 // LOC_Os06g36560 // LOC_Os05g44922 // LOC_Os10g08550 // LOC_Os07g43240 // LOC_Os01g16960 // LOC_Os12g05110 // LOC_Os01g67860 // LOC_Os06g13810 // LOC_Os04g58110 // LOC_Os08g25720 // LOC_Os10g28370 // LOC_Os02g41650 // LOC_Os08g02700 // LOC_Os02g41670 // LOC_Os07g43230 // …
GO:0016567	P	protein ubiquitination	9	1247	93	24460	0.06	0.15	// LOC_Os02g57700 // LOC_Os03g13740 // LOC_Os02g46500 // LOC_Os02g50460 // LOC_Os04g34030 // LOC_Os04g58920 // LOC_Os10g03440 // LOC_Os02g33590 // LOC_Os02g34410
GO:0006633	P	fatty acid biosynthetic process	7	1247	65	24460	0.06	0.15	// LOC_Os03g06705 // LOC_Os03g06700 // LOC_Os02g56860 // LOC_Os03g56820 // LOC_Os04g02640 // LOC_Os02g11070 // LOC_Os09g34930
GO:0070647	P	protein modification by small protein conjugation or removal	9	1247	94	24460	0.063	0.15	// LOC_Os02g57700 // LOC_Os03g13740 // LOC_Os02g46500 // LOC_Os02g50460 // LOC_Os04g34030 // LOC_Os04g58920 // LOC_Os10g03440 // LOC_Os02g33590 // LOC_Os02g34410
GO:0032446	P	protein modification by small protein conjugation	9	1247	94	24460	0.063	0.15	// LOC_Os02g57700 // LOC_Os03g13740 // LOC_Os02g46500 // LOC_Os02g50460 // LOC_Os04g34030 // LOC_Os04g58920 // LOC_Os10g03440 // LOC_Os02g33590 // LOC_Os02g34410
GO:0009308	P	amine metabolic process	29	1247	414	24460	0.064	0.15	// LOC_Os01g67030 // LOC_Os03g12890 // LOC_Os09g18530 // LOC_Os09g27510 // LOC_Os06g45670 // LOC_Os07g39690 // LOC_Os05g12770 // LOC_Os04g09390 // LOC_Os11g37940 // LOC_Os03g53650 // LOC_Os02g39330 // LOC_Os04g55720 // LOC_Os03g13300 // LOC_Os04g47190 // LOC_Os02g14110 // LOC_Os06g06130 // LOC_Os01g52260 // LOC_Os01g55540 // LOC_Os06g05690 // LOC_Os10g28350 // LOC_Os03g53800 // LOC_Os02g41650 // …
GO:0000003	P	reproduction	11	1247	125	24460	0.067	0.16	// LOC_Os01g48040 // LOC_Os06g06930 // LOC_Os04g28780 // LOC_Os04g53994 // LOC_Os01g48000 // LOC_Os11g10290 // LOC_Os11g03840 // LOC_Os10g40700 // LOC_Os10g40720 // LOC_Os12g03650 // LOC_Os05g07300
GO:0043413	P	macromolecule glycosylation	6	1247	55	24460	0.075	0.16	// LOC_Os02g38140 // LOC_Os11g30760 // LOC_Os04g35270 // LOC_Os09g27950 // LOC_Os09g26310 // LOC_Os09g26300
GO:0070085	P	glycosylation	6	1247	55	24460	0.075	0.16	// LOC_Os02g38140 // LOC_Os11g30760 // LOC_Os04g35270 // LOC_Os09g27950 // LOC_Os09g26310 // LOC_Os09g26300
GO:0009100	P	glycoprotein metabolic process	6	1247	55	24460	0.075	0.16	// LOC_Os02g38140 // LOC_Os11g30760 // LOC_Os04g35270 // LOC_Os09g27950 // LOC_Os09g26310 // LOC_Os09g26300
GO:0006486	P	protein amino acid glycosylation	6	1247	55	24460	0.075	0.16	// LOC_Os02g38140 // LOC_Os11g30760 // LOC_Os04g35270 // LOC_Os09g27950 // LOC_Os09g26310 // LOC_Os09g26300
GO:0009101	P	glycoprotein biosynthetic process	6	1247	55	24460	0.075	0.16	// LOC_Os02g38140 // LOC_Os11g30760 // LOC_Os04g35270 // LOC_Os09g27950 // LOC_Os09g26310 // LOC_Os09g26300
GO:0009056	P	catabolic process	30	1247	438	24460	0.074	0.16	// LOC_Os01g67030 // LOC_Os09g18530 // LOC_Os06g01590 // LOC_Os02g07260 // LOC_Os04g57440 // LOC_Os06g45670 // LOC_Os06g45710 // LOC_Os04g09390 // LOC_Os11g37940 // LOC_Os05g10650 // LOC_Os02g39330 // LOC_Os06g36560 // LOC_Os05g44922 // LOC_Os10g08550 // LOC_Os07g43240 // LOC_Os01g16960 // LOC_Os12g05110 // LOC_Os01g67860 // LOC_Os06g13810 // LOC_Os04g58110 // LOC_Os08g25720 // LOC_Os02g41650 // …
GO:0051704	P	multi-organism process	10	1247	113	24460	0.076	0.17	// LOC_Os11g37940 // LOC_Os06g06930 // LOC_Os01g48040 // LOC_Os04g28780 // LOC_Os04g53994 // LOC_Os01g48000 // LOC_Os11g10290 // LOC_Os11g03840 // LOC_Os12g03650 // LOC_Os05g07300
GO:0009875	P	pollen-pistil interaction	9	1247	99	24460	0.079	0.17	// LOC_Os01g48040 // LOC_Os06g06930 // LOC_Os04g28780 // LOC_Os04g53994 // LOC_Os01g48000 // LOC_Os11g10290 // LOC_Os11g03840 // LOC_Os12g03650 // LOC_Os05g07300
GO:0008037	P	cell recognition	9	1247	99	24460	0.079	0.17	// LOC_Os01g48040 // LOC_Os06g06930 // LOC_Os04g28780 // LOC_Os04g53994 // LOC_Os01g48000 // LOC_Os11g10290 // LOC_Os11g03840 // LOC_Os12g03650 // LOC_Os05g07300
GO:0048544	P	recognition of pollen	9	1247	99	24460	0.079	0.17	// LOC_Os01g48040 // LOC_Os06g06930 // LOC_Os04g28780 // LOC_Os04g53994 // LOC_Os01g48000 // LOC_Os11g10290 // LOC_Os11g03840 // LOC_Os12g03650 // LOC_Os05g07300
GO:0009856	P	pollination	9	1247	99	24460	0.079	0.17	// LOC_Os01g48040 // LOC_Os06g06930 // LOC_Os04g28780 // LOC_Os04g53994 // LOC_Os01g48000 // LOC_Os11g10290 // LOC_Os11g03840 // LOC_Os12g03650 // LOC_Os05g07300
GO:0033036	P	macromolecule localization	28	1247	408	24460	0.081	0.17	// LOC_Os06g43600 // LOC_Os02g44310 // LOC_Os06g07220 // LOC_Os03g01320 // LOC_Os01g52250 // LOC_Os05g01030 // LOC_Os10g40440 // LOC_Os05g39760 // LOC_Os11g02389 // LOC_Os10g40520 // LOC_Os10g40614 // LOC_Os12g02290 // LOC_Os10g40480 // LOC_Os03g59660 // LOC_Os04g46830 // LOC_Os08g01710 // LOC_Os01g47730 // LOC_Os03g20949 // LOC_Os10g40470 // LOC_Os10g40530 // LOC_Os03g38590 // LOC_Os03g57310 // …
GO:0000160	P	two-component signal transduction system (phosphorelay)	6	1247	60	24460	0.1	0.21	// LOC_Os05g09410 // LOC_Os11g01140 // LOC_Os06g43910 // LOC_Os12g01140 // LOC_Os06g44410 // LOC_Os04g57720
GO:0034641	P	cellular nitrogen compound metabolic process	31	1247	473	24460	0.11	0.21	// LOC_Os12g09540 // LOC_Os03g12890 // LOC_Os09g18530 // LOC_Os05g35580 // LOC_Os09g27510 // LOC_Os06g45670 // LOC_Os01g67030 // LOC_Os07g39690 // LOC_Os05g12770 // LOC_Os02g14110 // LOC_Os03g53650 // LOC_Os10g35840 // LOC_Os05g30454 // LOC_Os04g55720 // LOC_Os03g13300 // LOC_Os04g47190 // LOC_Os04g41260 // LOC_Os06g06130 // LOC_Os01g52260 // LOC_Os01g55540 // LOC_Os10g28370 // LOC_Os06g05690 // …
GO:0022414	P	reproductive process	9	1247	106	24460	0.11	0.22	// LOC_Os01g48040 // LOC_Os06g06930 // LOC_Os04g28780 // LOC_Os04g53994 // LOC_Os01g48000 // LOC_Os11g10290 // LOC_Os11g03840 // LOC_Os12g03650 // LOC_Os05g07300
GO:0016053	P	organic acid biosynthetic process	15	1247	203	24460	0.11	0.22	// LOC_Os10g28350 // LOC_Os03g53650 // LOC_Os03g06705 // LOC_Os03g06700 // LOC_Os02g56860 // LOC_Os03g56820 // LOC_Os01g52260 // LOC_Os04g55720 // LOC_Os05g48200 // LOC_Os04g02640 // LOC_Os02g11070 // LOC_Os07g39690 // LOC_Os06g05690 // LOC_Os02g50240 // LOC_Os09g34930
GO:0046394	P	carboxylic acid biosynthetic process	15	1247	203	24460	0.11	0.22	// LOC_Os10g28350 // LOC_Os03g53650 // LOC_Os03g06705 // LOC_Os03g06700 // LOC_Os02g56860 // LOC_Os03g56820 // LOC_Os01g52260 // LOC_Os04g55720 // LOC_Os05g48200 // LOC_Os04g02640 // LOC_Os02g11070 // LOC_Os07g39690 // LOC_Os06g05690 // LOC_Os02g50240 // LOC_Os09g34930
GO:0005976	P	polysaccharide metabolic process	11	1247	140	24460	0.12	0.23	// LOC_Os11g37940 // LOC_Os07g36740 // LOC_Os02g39330 // LOC_Os09g30120 // LOC_Os01g52250 // LOC_Os10g39840 // LOC_Os07g36610 // LOC_Os04g09390 // LOC_Os04g51460 // LOC_Os06g02180 // LOC_Os11g33270
GO:0044272	P	sulfur compound biosynthetic process	5	1247	49	24460	0.12	0.23	// LOC_Os05g30454 // LOC_Os03g53650 // LOC_Os06g05690 // LOC_Os01g52260 // LOC_Os10g28350
GO:0006091	P	generation of precursor metabolites and energy	21	1247	308	24460	0.12	0.24	// LOC_Os12g05110 // LOC_Os01g16960 // LOC_Os06g01590 // LOC_Os01g08190 // LOC_Os05g10650 // LOC_Os06g45710 // LOC_Os06g13810 // LOC_Os11g05110 // LOC_Os01g52240 // LOC_Os03g39610 // LOC_Os04g58110 // LOC_Os01g67860 // LOC_Os12g44300 // LOC_Os05g44922 // LOC_Os08g25720 // LOC_Os10g08550 // LOC_Os08g02700 // LOC_Os01g24600 // LOC_Os02g07260 // LOC_Os01g42234 // LOC_Os01g24550
GO:0006073	P	cellular glucan metabolic process	8	1247	95	24460	0.13	0.24	// LOC_Os07g36740 // LOC_Os09g30120 // LOC_Os01g52250 // LOC_Os10g39840 // LOC_Os07g36610 // LOC_Os04g51460 // LOC_Os06g02180 // LOC_Os11g33270
GO:0044042	P	glucan metabolic process	8	1247	95	24460	0.13	0.24	// LOC_Os07g36740 // LOC_Os09g30120 // LOC_Os01g52250 // LOC_Os10g39840 // LOC_Os07g36610 // LOC_Os04g51460 // LOC_Os06g02180 // LOC_Os11g33270
GO:0044283	P	small molecule biosynthetic process	20	1247	297	24460	0.14	0.26	// LOC_Os10g28350 // LOC_Os03g53650 // LOC_Os12g09540 // LOC_Os03g06700 // LOC_Os05g35580 // LOC_Os02g56860 // LOC_Os02g36340 // LOC_Os04g55720 // LOC_Os03g56820 // LOC_Os10g13700 // LOC_Os05g30454 // LOC_Os01g52260 // LOC_Os03g06705 // LOC_Os05g48200 // LOC_Os04g02640 // LOC_Os02g11070 // LOC_Os07g39690 // LOC_Os06g05690 // LOC_Os02g50240 // LOC_Os09g34930
GO:0044106	P	cellular amine metabolic process	24	1247	366	24460	0.14	0.26	// LOC_Os01g67030 // LOC_Os03g12890 // LOC_Os09g18530 // LOC_Os09g27510 // LOC_Os06g45670 // LOC_Os07g39690 // LOC_Os05g12770 // LOC_Os02g14110 // LOC_Os03g53650 // LOC_Os04g55720 // LOC_Os03g13300 // LOC_Os04g47190 // LOC_Os06g06130 // LOC_Os01g52260 // LOC_Os01g55540 // LOC_Os06g05690 // LOC_Os10g28350 // LOC_Os03g53800 // LOC_Os02g41650 // LOC_Os02g41670 // LOC_Os05g48200 // LOC_Os06g35540 // …
GO:0006520	P	cellular amino acid metabolic process	22	1247	332	24460	0.14	0.26	// LOC_Os01g67030 // LOC_Os03g12890 // LOC_Os09g27510 // LOC_Os06g45670 // LOC_Os07g39690 // LOC_Os05g12770 // LOC_Os02g14110 // LOC_Os03g53650 // LOC_Os04g55720 // LOC_Os03g13300 // LOC_Os04g47190 // LOC_Os06g06130 // LOC_Os01g52260 // LOC_Os01g55540 // LOC_Os06g05690 // LOC_Os10g28350 // LOC_Os03g53800 // LOC_Os02g41650 // LOC_Os02g41670 // LOC_Os05g48200 // LOC_Os06g35540 // LOC_Os02g50240
GO:0045454	P	cell redox homeostasis	9	1247	114	24460	0.14	0.26	// LOC_Os06g12030 // LOC_Os05g48930 // LOC_Os11g43520 // LOC_Os02g40500 // LOC_Os03g29190 // LOC_Os12g35340 // LOC_Os01g09830 // LOC_Os01g47760 // LOC_Os12g35330
GO:0044265	P	cellular macromolecule catabolic process	17	1247	248	24460	0.15	0.27	// LOC_Os12g05110 // LOC_Os01g16960 // LOC_Os06g01590 // LOC_Os05g44922 // LOC_Os05g10650 // LOC_Os01g67860 // LOC_Os06g13810 // LOC_Os11g05110 // LOC_Os04g58110 // LOC_Os06g36560 // LOC_Os07g43230 // LOC_Os08g25720 // LOC_Os10g08550 // LOC_Os08g02700 // LOC_Os07g43240 // LOC_Os02g07260 // LOC_Os06g45710
GO:0044264	P	cellular polysaccharide metabolic process	8	1247	100	24460	0.15	0.28	// LOC_Os07g36740 // LOC_Os09g30120 // LOC_Os01g52250 // LOC_Os10g39840 // LOC_Os07g36610 // LOC_Os04g51460 // LOC_Os06g02180 // LOC_Os11g33270
GO:0006813	P	potassium ion transport	5	1247	55	24460	0.17	0.29	// LOC_Os04g32920 // LOC_Os04g52120 // LOC_Os06g48810 // LOC_Os07g47350 // LOC_Os07g48130
GO:0009057	P	macromolecule catabolic process	20	1247	312	24460	0.19	0.33	// LOC_Os12g05110 // LOC_Os11g37940 // LOC_Os06g01590 // LOC_Os05g44922 // LOC_Os05g10650 // LOC_Os01g16960 // LOC_Os01g67860 // LOC_Os08g02700 // LOC_Os11g05110 // LOC_Os04g58110 // LOC_Os06g36560 // LOC_Os07g43230 // LOC_Os08g25720 // LOC_Os10g08550 // LOC_Os06g13810 // LOC_Os07g43240 // LOC_Os02g07260 // LOC_Os06g45710 // LOC_Os02g39330 // LOC_Os04g09390
GO:0006915	P	apoptosis	29	1247	475	24460	0.2	0.34	// LOC_Os12g17430 // LOC_Os10g07400 // LOC_Os07g09900 // LOC_Os02g27680 // LOC_Os12g31620 // LOC_Os05g12770 // LOC_Os11g37870 // LOC_Os11g14380 // LOC_Os11g12330 // LOC_Os12g06920 // LOC_Os11g45970 // LOC_Os11g46210 // LOC_Os01g33810 // LOC_Os11g11960 // LOC_Os11g11940 // LOC_Os03g40194 // LOC_Os11g45780 // LOC_Os07g33740 // LOC_Os11g41170 // LOC_Os12g32790 // LOC_Os08g19694 // LOC_Os11g12240 // …
GO:0012501	P	programmed cell death	29	1247	475	24460	0.2	0.34	// LOC_Os12g17430 // LOC_Os10g07400 // LOC_Os07g09900 // LOC_Os02g27680 // LOC_Os12g31620 // LOC_Os05g12770 // LOC_Os11g37870 // LOC_Os11g14380 // LOC_Os11g12330 // LOC_Os12g06920 // LOC_Os11g45970 // LOC_Os11g46210 // LOC_Os01g33810 // LOC_Os11g11960 // LOC_Os11g11940 // LOC_Os03g40194 // LOC_Os11g45780 // LOC_Os07g33740 // LOC_Os11g41170 // LOC_Os12g32790 // LOC_Os08g19694 // LOC_Os11g12240 // …
GO:0019725	P	cellular homeostasis	9	1247	129	24460	0.23	0.39	// LOC_Os06g12030 // LOC_Os05g48930 // LOC_Os11g43520 // LOC_Os02g40500 // LOC_Os03g29190 // LOC_Os12g35340 // LOC_Os01g09830 // LOC_Os01g47760 // LOC_Os12g35330
GO:0006855	P	multidrug transport	5	1247	63	24460	0.23	0.39	// LOC_Os01g31980 // LOC_Os10g20470 // LOC_Os09g37610 // LOC_Os05g48040 // LOC_Os08g37432
GO:0016265	P	death	29	1247	487	24460	0.23	0.39	// LOC_Os12g17430 // LOC_Os10g07400 // LOC_Os07g09900 // LOC_Os02g27680 // LOC_Os12g31620 // LOC_Os05g12770 // LOC_Os11g37870 // LOC_Os11g14380 // LOC_Os11g12330 // LOC_Os12g06920 // LOC_Os11g45970 // LOC_Os11g46210 // LOC_Os01g33810 // LOC_Os11g11960 // LOC_Os11g11940 // LOC_Os03g40194 // LOC_Os11g45780 // LOC_Os07g33740 // LOC_Os11g41170 // LOC_Os12g32790 // LOC_Os08g19694 // LOC_Os11g12240 // …
GO:0008219	P	cell death	29	1247	487	24460	0.23	0.39	// LOC_Os12g17430 // LOC_Os10g07400 // LOC_Os07g09900 // LOC_Os02g27680 // LOC_Os12g31620 // LOC_Os05g12770 // LOC_Os11g37870 // LOC_Os11g14380 // LOC_Os11g12330 // LOC_Os12g06920 // LOC_Os11g45970 // LOC_Os11g46210 // LOC_Os01g33810 // LOC_Os11g11960 // LOC_Os11g11940 // LOC_Os03g40194 // LOC_Os11g45780 // LOC_Os07g33740 // LOC_Os11g41170 // LOC_Os12g32790 // LOC_Os08g19694 // LOC_Os11g12240 // …
GO:0006790	P	sulfur metabolic process	5	1247	63	24460	0.23	0.39	// LOC_Os05g30454 // LOC_Os03g53650 // LOC_Os06g05690 // LOC_Os01g52260 // LOC_Os10g28350
GO:0009250	P	glucan biosynthetic process	5	1247	65	24460	0.25	0.41	// LOC_Os01g52250 // LOC_Os07g36740 // LOC_Os07g36610 // LOC_Os06g02180 // LOC_Os09g30120
GO:0044255	P	cellular lipid metabolic process	14	1247	221	24460	0.25	0.41	// LOC_Os01g65830 // LOC_Os08g10010 // LOC_Os03g06705 // LOC_Os03g06700 // LOC_Os09g31970 // LOC_Os08g01940 // LOC_Os02g56860 // LOC_Os03g56820 // LOC_Os04g57440 // LOC_Os08g40180 // LOC_Os04g02640 // LOC_Os02g11070 // LOC_Os06g40170 // LOC_Os09g34930
GO:0008610	P	lipid biosynthetic process	10	1247	151	24460	0.26	0.42	// LOC_Os03g06705 // LOC_Os03g59290 // LOC_Os03g06700 // LOC_Os09g31970 // LOC_Os02g56860 // LOC_Os03g56820 // LOC_Os08g40180 // LOC_Os04g02640 // LOC_Os02g11070 // LOC_Os09g34930
GO:0042493	P	response to drug	5	1247	66	24460	0.26	0.42	// LOC_Os01g31980 // LOC_Os10g20470 // LOC_Os09g37610 // LOC_Os05g48040 // LOC_Os08g37432
GO:0015893	P	drug transport	5	1247	66	24460	0.26	0.42	// LOC_Os01g31980 // LOC_Os10g20470 // LOC_Os09g37610 // LOC_Os05g48040 // LOC_Os08g37432
GO:0042592	P	homeostatic process	9	1247	136	24460	0.27	0.43	// LOC_Os06g12030 // LOC_Os05g48930 // LOC_Os11g43520 // LOC_Os02g40500 // LOC_Os03g29190 // LOC_Os12g35340 // LOC_Os01g09830 // LOC_Os01g47760 // LOC_Os12g35330
GO:0055085	P	transmembrane transport	14	1247	227	24460	0.28	0.45	// LOC_Os10g20470 // LOC_Os07g39350 // LOC_Os02g36414 // LOC_Os05g48040 // LOC_Os01g31980 // LOC_Os08g37432 // LOC_Os09g37610 // LOC_Os04g37980 // LOC_Os10g21590 // LOC_Os12g44300 // LOC_Os01g08190 // LOC_Os02g36440 // LOC_Os07g37320 // LOC_Os07g01560
GO:0006811	P	ion transport	26	1247	450	24460	0.29	0.46	// LOC_Os04g39350 // LOC_Os01g48710 // LOC_Os04g32920 // LOC_Os07g26110 // LOC_Os04g39370 // LOC_Os07g48130 // LOC_Os01g56420 // LOC_Os02g37320 // LOC_Os07g20340 // LOC_Os12g44300 // LOC_Os06g48810 // LOC_Os01g08190 // LOC_Os12g42200 // LOC_Os02g07044 // LOC_Os10g30770 // LOC_Os05g41580 // LOC_Os06g48060 // LOC_Os02g55890 // LOC_Os07g47350 // LOC_Os10g30790 // LOC_Os01g74490 // LOC_Os08g31340 // …
GO:0033692	P	cellular polysaccharide biosynthetic process	5	1247	70	24460	0.3	0.47	// LOC_Os01g52250 // LOC_Os07g36740 // LOC_Os07g36610 // LOC_Os06g02180 // LOC_Os09g30120
GO:0044271	P	cellular nitrogen compound biosynthetic process	14	1247	232	24460	0.31	0.48	// LOC_Os10g28350 // LOC_Os03g53650 // LOC_Os12g09540 // LOC_Os05g35580 // LOC_Os02g36340 // LOC_Os04g55720 // LOC_Os05g30454 // LOC_Os01g52260 // LOC_Os04g41260 // LOC_Os05g48200 // LOC_Os07g39690 // LOC_Os10g35840 // LOC_Os06g05690 // LOC_Os02g50240
GO:0006629	P	lipid metabolic process	28	1247	492	24460	0.31	0.48	// LOC_Os08g10010 // LOC_Os03g06705 // LOC_Os03g06700 // LOC_Os01g61570 // LOC_Os01g11730 // LOC_Os01g11650 // LOC_Os11g19340 // LOC_Os04g57440 // LOC_Os03g56820 // LOC_Os01g65830 // LOC_Os03g59290 // LOC_Os06g50940 // LOC_Os02g56860 // LOC_Os04g42860 // LOC_Os05g06710 // LOC_Os08g40180 // LOC_Os06g06290 // LOC_Os01g11700 // LOC_Os07g23430 // LOC_Os05g43100 // LOC_Os02g11070 // LOC_Os06g14490 // …
GO:0000271	P	polysaccharide biosynthetic process	5	1247	73	24460	0.33	0.5	// LOC_Os01g52250 // LOC_Os07g36740 // LOC_Os07g36610 // LOC_Os06g02180 // LOC_Os09g30120
GO:0008652	P	cellular amino acid biosynthetic process	8	1247	129	24460	0.35	0.52	// LOC_Os10g28350 // LOC_Os03g53650 // LOC_Os01g52260 // LOC_Os04g55720 // LOC_Os05g48200 // LOC_Os07g39690 // LOC_Os06g05690 // LOC_Os02g50240
GO:0006519	P	cellular amino acid and derivative metabolic process	23	1247	408	24460	0.35	0.52	// LOC_Os01g67030 // LOC_Os03g12890 // LOC_Os09g27510 // LOC_Os06g45670 // LOC_Os07g39690 // LOC_Os05g12770 // LOC_Os02g14110 // LOC_Os03g53650 // LOC_Os04g55720 // LOC_Os03g13300 // LOC_Os04g47190 // LOC_Os06g06130 // LOC_Os01g52260 // LOC_Os01g55540 // LOC_Os06g05690 // LOC_Os10g28350 // LOC_Os03g53800 // LOC_Os02g41650 // LOC_Os02g41670 // LOC_Os05g48200 // LOC_Os06g35540 // LOC_Os06g40170 // …
GO:0006812	P	cation transport	22	1247	390	24460	0.35	0.53	// LOC_Os04g39350 // LOC_Os01g48710 // LOC_Os04g32920 // LOC_Os07g26110 // LOC_Os04g39370 // LOC_Os07g48130 // LOC_Os01g56420 // LOC_Os02g37320 // LOC_Os07g20340 // LOC_Os12g44300 // LOC_Os06g48810 // LOC_Os01g08190 // LOC_Os12g42200 // LOC_Os05g41580 // LOC_Os02g55890 // LOC_Os07g47350 // LOC_Os01g74490 // LOC_Os08g31340 // LOC_Os07g48390 // LOC_Os05g25194 // LOC_Os10g30450 // LOC_Os04g52120
GO:0065008	P	regulation of biological quality	10	1247	169	24460	0.37	0.55	// LOC_Os06g12030 // LOC_Os05g48930 // LOC_Os11g43520 // LOC_Os02g40500 // LOC_Os03g29190 // LOC_Os12g35340 // LOC_Os01g09830 // LOC_Os01g47760 // LOC_Os12g35330 // LOC_Os01g56810
GO:0032501	P	multicellular organismal process	9	1247	155	24460	0.4	0.59	// LOC_Os01g48040 // LOC_Os06g06930 // LOC_Os04g28780 // LOC_Os04g53994 // LOC_Os01g48000 // LOC_Os11g10290 // LOC_Os11g03840 // LOC_Os12g03650 // LOC_Os05g07300
GO:0016311	P	dephosphorylation	5	1247	83	24460	0.42	0.62	// LOC_Os01g19130 // LOC_Os06g10650 // LOC_Os02g55560 // LOC_Os03g10950 // LOC_Os02g08364
GO:0007154	P	cell communication	9	1247	164	24460	0.46	0.67	// LOC_Os01g48040 // LOC_Os06g06930 // LOC_Os04g28780 // LOC_Os04g53994 // LOC_Os01g48000 // LOC_Os11g10290 // LOC_Os11g03840 // LOC_Os12g03650 // LOC_Os05g07300
GO:0009309	P	amine biosynthetic process	8	1247	149	24460	0.49	0.71	// LOC_Os10g28350 // LOC_Os03g53650 // LOC_Os01g52260 // LOC_Os04g55720 // LOC_Os05g48200 // LOC_Os07g39690 // LOC_Os06g05690 // LOC_Os02g50240
GO:0055086	P	nucleobase, nucleoside and nucleotide metabolic process	14	1247	275	24460	0.54	0.77	// LOC_Os12g09540 // LOC_Os05g13970 // LOC_Os05g41580 // LOC_Os09g31970 // LOC_Os05g35580 // LOC_Os05g01030 // LOC_Os07g30970 // LOC_Os03g20949 // LOC_Os12g44300 // LOC_Os01g48530 // LOC_Os05g06940 // LOC_Os01g08190 // LOC_Os07g42160 // LOC_Os08g40180
GO:0006725	P	cellular aromatic compound metabolic process	7	1247	150	24460	0.64	0.92	// LOC_Os12g09540 // LOC_Os02g41650 // LOC_Os01g65690 // LOC_Os02g41670 // LOC_Os05g35580 // LOC_Os05g30454 // LOC_Os01g56810
GO:0046483	P	heterocycle metabolic process	16	1247	349	24460	0.7	0.98	// LOC_Os12g09540 // LOC_Os05g41580 // LOC_Os01g67030 // LOC_Os10g28370 // LOC_Os05g35580 // LOC_Os05g30454 // LOC_Os09g18530 // LOC_Os05g01030 // LOC_Os07g30970 // LOC_Os03g20949 // LOC_Os12g44300 // LOC_Os04g41260 // LOC_Os01g48530 // LOC_Os01g08190 // LOC_Os10g35840 // LOC_Os01g56810
GO:0023052	P	signaling	23	1247	495	24460	0.7	0.98	// LOC_Os11g10290 // LOC_Os01g09120 // LOC_Os11g03840 // LOC_Os04g57720 // LOC_Os04g28780 // LOC_Os04g53994 // LOC_Os02g36350 // LOC_Os05g26940 // LOC_Os11g01140 // LOC_Os06g43910 // LOC_Os05g07300 // LOC_Os07g05620 // LOC_Os01g48040 // LOC_Os01g47730 // LOC_Os01g48000 // LOC_Os06g12030 // LOC_Os06g44410 // LOC_Os06g06930 // LOC_Os05g09410 // LOC_Os02g47110 // LOC_Os05g43820 // LOC_Os12g01140 // …
GO:0009117	P	nucleotide metabolic process	11	1247	247	24460	0.71	0.99	// LOC_Os05g41580 // LOC_Os09g31970 // LOC_Os05g01030 // LOC_Os07g30970 // LOC_Os03g20949 // LOC_Os12g44300 // LOC_Os01g48530 // LOC_Os05g06940 // LOC_Os01g08190 // LOC_Os07g42160 // LOC_Os08g40180
GO:0006753	P	nucleoside phosphate metabolic process	11	1247	247	24460	0.71	0.99	// LOC_Os05g41580 // LOC_Os09g31970 // LOC_Os05g01030 // LOC_Os07g30970 // LOC_Os03g20949 // LOC_Os12g44300 // LOC_Os01g48530 // LOC_Os05g06940 // LOC_Os01g08190 // LOC_Os07g42160 // LOC_Os08g40180
GO:0051186	P	cofactor metabolic process	6	1247	142	24460	0.73	1	// LOC_Os04g41260 // LOC_Os09g31970 // LOC_Os05g30454 // LOC_Os06g05910 // LOC_Os08g40180 // LOC_Os10g28370
GO:0015672	P	monovalent inorganic cation transport	8	1247	186	24460	0.73	1	// LOC_Os04g32920 // LOC_Os07g47350 // LOC_Os07g48130 // LOC_Os01g08190 // LOC_Os12g44300 // LOC_Os06g48810 // LOC_Os02g55890 // LOC_Os04g52120
GO:0008104	P	protein localization	8	1247	302	24460	0.98	1	// LOC_Os03g38590 // LOC_Os01g47730 // LOC_Os01g52250 // LOC_Os02g47110 // LOC_Os05g39760 // LOC_Os03g59660 // LOC_Os05g43820 // LOC_Os03g57310
GO:0009165	P	nucleotide biosynthetic process	7	1247	207	24460	0.9	1	// LOC_Os05g41580 // LOC_Os05g01030 // LOC_Os07g30970 // LOC_Os03g20949 // LOC_Os12g44300 // LOC_Os01g48530 // LOC_Os01g08190
GO:0070727	P	cellular macromolecule localization	7	1247	211	24460	0.91	1	// LOC_Os01g47730 // LOC_Os01g52250 // LOC_Os02g47110 // LOC_Os05g39760 // LOC_Os03g59660 // LOC_Os05g43820 // LOC_Os03g57310
GO:0009199	P	ribonucleoside triphosphate metabolic process	6	1247	165	24460	0.84	1	// LOC_Os05g41580 // LOC_Os05g01030 // LOC_Os07g30970 // LOC_Os03g20949 // LOC_Os12g44300 // LOC_Os01g08190
GO:0006260	P	DNA replication	13	1247	2772	24460	1	1	// LOC_Os12g16150 // LOC_Os12g20190 // LOC_Os11g14090 // LOC_Os06g25760 // LOC_Os04g11240 // LOC_Os07g02650 // LOC_Os12g19180 // LOC_Os02g51660 // LOC_Os06g23170 // LOC_Os01g31420 // LOC_Os01g08250 // LOC_Os02g02100 // LOC_Os02g18520
GO:0009206	P	purine ribonucleoside triphosphate biosynthetic process	6	1247	163	24460	0.83	1	// LOC_Os05g41580 // LOC_Os05g01030 // LOC_Os07g30970 // LOC_Os03g20949 // LOC_Os12g44300 // LOC_Os01g08190
GO:0009205	P	purine ribonucleoside triphosphate metabolic process	6	1247	165	24460	0.84	1	// LOC_Os05g41580 // LOC_Os05g01030 // LOC_Os07g30970 // LOC_Os03g20949 // LOC_Os12g44300 // LOC_Os01g08190
GO:0009201	P	ribonucleoside triphosphate biosynthetic process	6	1247	163	24460	0.83	1	// LOC_Os05g41580 // LOC_Os05g01030 // LOC_Os07g30970 // LOC_Os03g20949 // LOC_Os12g44300 // LOC_Os01g08190
GO:0046034	P	ATP metabolic process	5	1247	160	24460	0.91	1	// LOC_Os03g20949 // LOC_Os12g44300 // LOC_Os05g41580 // LOC_Os01g08190 // LOC_Os05g01030
GO:0045184	P	establishment of protein localization	8	1247	291	24460	0.98	1	// LOC_Os03g38590 // LOC_Os01g47730 // LOC_Os01g52250 // LOC_Os02g47110 // LOC_Os05g39760 // LOC_Os03g59660 // LOC_Os05g43820 // LOC_Os03g57310
GO:0006278	P	RNA-dependent DNA replication	11	1247	2703	24460	1	1	// LOC_Os12g16150 // LOC_Os12g20190 // LOC_Os11g14090 // LOC_Os06g25760 // LOC_Os04g11240 // LOC_Os07g02650 // LOC_Os06g23170 // LOC_Os01g31420 // LOC_Os01g08250 // LOC_Os02g02100 // LOC_Os02g18520
GO:0016192	P	vesicle-mediated transport	7	1247	197	24460	0.87	1	// LOC_Os02g55970 // LOC_Os01g67810 // LOC_Os12g06840 // LOC_Os11g36400 // LOC_Os03g59660 // LOC_Os03g57310 // LOC_Os01g67820
GO:0019538	P	protein metabolic process	247	1247	6115	24460	1	1	// LOC_Os01g67810 // LOC_Os04g35270 // LOC_Os02g08364 // LOC_Os09g27950 // LOC_Os09g25640 // LOC_Os03g17700 // LOC_Os04g52840 // LOC_Os12g14699 // LOC_Os05g40770 // LOC_Os09g29710 // LOC_Os08g40280 // LOC_Os03g58890 // LOC_Os02g48210 // LOC_Os02g05980 // LOC_Os03g12470 // LOC_Os09g18530 // LOC_Os11g01140 // LOC_Os01g49529 // LOC_Os12g10740 // LOC_Os03g10950 // LOC_Os11g36150 // LOC_Os02g02600 // …
GO:0006164	P	purine nucleotide biosynthetic process	7	1247	184	24460	0.82	1	// LOC_Os05g41580 // LOC_Os05g01030 // LOC_Os07g30970 // LOC_Os03g20949 // LOC_Os12g44300 // LOC_Os01g48530 // LOC_Os01g08190
GO:0007165	P	signal transduction	8	1247	268	24460	0.96	1	// LOC_Os07g05620 // LOC_Os06g12030 // LOC_Os01g47730 // LOC_Os02g36350 // LOC_Os05g26940 // LOC_Os01g09120 // LOC_Os02g47110 // LOC_Os05g43820
GO:0006457	P	protein folding	5	1247	167	24460	0.92	1	// LOC_Os01g65480 // LOC_Os01g67054 // LOC_Os04g46390 // LOC_Os03g44620 // LOC_Os08g43490
GO:0034645	P	cellular macromolecule biosynthetic process	204	1247	5248	24460	1	1	// LOC_Os07g48450 // LOC_Os04g35270 // LOC_Os05g04210 // LOC_Os01g64790 // LOC_Os01g09120 // LOC_Os04g57720 // LOC_Os01g31420 // LOC_Os08g38210 // LOC_Os06g17480 // LOC_Os01g68370 // LOC_Os05g37080 // LOC_Os07g05010 // LOC_Os11g01140 // LOC_Os07g48260 // LOC_Os03g08460 // LOC_Os12g29330 // LOC_Os09g30120 // LOC_Os08g19694 // LOC_Os01g33810 // LOC_Os03g20910 // LOC_Os06g36000 // LOC_Os06g06130 // …
GO:0009141	P	nucleoside triphosphate metabolic process	6	1247	165	24460	0.84	1	// LOC_Os05g41580 // LOC_Os05g01030 // LOC_Os07g30970 // LOC_Os03g20949 // LOC_Os12g44300 // LOC_Os01g08190
GO:0009142	P	nucleoside triphosphate biosynthetic process	6	1247	163	24460	0.83	1	// LOC_Os05g41580 // LOC_Os05g01030 // LOC_Os07g30970 // LOC_Os03g20949 // LOC_Os12g44300 // LOC_Os01g08190
GO:0009144	P	purine nucleoside triphosphate metabolic process	6	1247	165	24460	0.84	1	// LOC_Os05g41580 // LOC_Os05g01030 // LOC_Os07g30970 // LOC_Os03g20949 // LOC_Os12g44300 // LOC_Os01g08190
GO:0009145	P	purine nucleoside triphosphate biosynthetic process	6	1247	163	24460	0.83	1	// LOC_Os05g41580 // LOC_Os05g01030 // LOC_Os07g30970 // LOC_Os03g20949 // LOC_Os12g44300 // LOC_Os01g08190
GO:0006807	P	nitrogen compound metabolic process	246	1247	7115	24460	1	1	// LOC_Os07g48450 // LOC_Os12g09540 // LOC_Os05g04210 // LOC_Os05g06940 // LOC_Os01g64790 // LOC_Os02g15560 // LOC_Os01g09120 // LOC_Os02g36880 // LOC_Os04g57720 // LOC_Os01g31420 // LOC_Os08g38210 // LOC_Os05g48590 // LOC_Os04g09390 // LOC_Os06g17480 // LOC_Os10g28370 // LOC_Os01g68370 // LOC_Os05g37080 // LOC_Os09g18530 // LOC_Os07g05010 // LOC_Os11g01140 // LOC_Os05g13970 // LOC_Os07g48260 // …
GO:0034660	P	ncRNA metabolic process	6	1247	186	24460	0.91	1	// LOC_Os03g53800 // LOC_Os10g39770 // LOC_Os09g27510 // LOC_Os06g06130 // LOC_Os03g12900 // LOC_Os05g12770
GO:0043170	P	macromolecule metabolic process	456	1247	10789	24460	1	1	// LOC_Os04g35270 // LOC_Os02g08364 // LOC_Os09g25640 // LOC_Os01g09120 // LOC_Os04g09390 // LOC_Os02g48210 // LOC_Os02g05980 // LOC_Os03g12470 // LOC_Os11g01140 // LOC_Os06g07040 // LOC_Os03g10950 // LOC_Os11g36150 // LOC_Os07g35004 // LOC_Os01g33810 // LOC_Os08g40270 // LOC_Os06g36000 // LOC_Os04g52780 // LOC_Os07g12340 // LOC_Os05g25390 // LOC_Os06g06930 // LOC_Os07g34850 // LOC_Os06g46330 // …
GO:0044260	P	cellular macromolecule metabolic process	406	1247	9405	24460	1	1	// LOC_Os04g35270 // LOC_Os02g08364 // LOC_Os01g09120 // LOC_Os02g48210 // LOC_Os02g05980 // LOC_Os03g12470 // LOC_Os11g01140 // LOC_Os06g07040 // LOC_Os03g10950 // LOC_Os11g36150 // LOC_Os07g35004 // LOC_Os01g33810 // LOC_Os08g40270 // LOC_Os06g36000 // LOC_Os04g52780 // LOC_Os07g12340 // LOC_Os05g25390 // LOC_Os06g06930 // LOC_Os06g46330 // LOC_Os12g03670 // LOC_Os02g45040 // LOC_Os04g46390 // …
GO:0006886	P	intracellular protein transport	7	1247	208	24460	0.9	1	// LOC_Os01g47730 // LOC_Os01g52250 // LOC_Os02g47110 // LOC_Os05g39760 // LOC_Os03g59660 // LOC_Os05g43820 // LOC_Os03g57310
GO:0016043	P	cellular component organization	7	1247	1226	24460	1	1	// LOC_Os02g55970 // LOC_Os08g38720 // LOC_Os02g12380 // LOC_Os04g13530 // LOC_Os06g23170 // LOC_Os02g02100 // LOC_Os07g08710
GO:0009150	P	purine ribonucleotide metabolic process	7	1247	181	24460	0.81	1	// LOC_Os05g41580 // LOC_Os05g01030 // LOC_Os07g30970 // LOC_Os03g20949 // LOC_Os12g44300 // LOC_Os01g48530 // LOC_Os01g08190
GO:0009152	P	purine ribonucleotide biosynthetic process	7	1247	179	24460	0.8	1	// LOC_Os05g41580 // LOC_Os05g01030 // LOC_Os07g30970 // LOC_Os03g20949 // LOC_Os12g44300 // LOC_Os01g48530 // LOC_Os01g08190
GO:0008152	P	metabolic process	686	1247	14088	24460	0.97	1	// LOC_Os04g35270 // LOC_Os02g08364 // LOC_Os09g25640 // LOC_Os01g61570 // LOC_Os11g19340 // LOC_Os01g09120 // LOC_Os05g48590 // LOC_Os11g47610 // LOC_Os05g15530 // LOC_Os04g09390 // LOC_Os02g48210 // LOC_Os02g05980 // LOC_Os08g40680 // LOC_Os03g12470 // LOC_Os11g01140 // LOC_Os06g07040 // LOC_Os03g10950 // LOC_Os11g36150 // LOC_Os07g35004 // LOC_Os11g10480 // LOC_Os11g36090 // LOC_Os08g40270 // …
GO:0046907	P	intracellular transport	7	1247	237	24460	0.95	1	// LOC_Os01g47730 // LOC_Os01g52250 // LOC_Os02g47110 // LOC_Os05g39760 // LOC_Os03g59660 // LOC_Os05g43820 // LOC_Os03g57310
GO:0009260	P	ribonucleotide biosynthetic process	7	1247	182	24460	0.82	1	// LOC_Os05g41580 // LOC_Os05g01030 // LOC_Os07g30970 // LOC_Os03g20949 // LOC_Os12g44300 // LOC_Os01g48530 // LOC_Os01g08190
GO:0015074	P	DNA integration	11	1247	3206	24460	1	1	// LOC_Os12g20190 // LOC_Os03g36279 // LOC_Os06g25760 // LOC_Os04g54280 // LOC_Os04g11240 // LOC_Os11g32180 // LOC_Os11g31680 // LOC_Os02g02100 // LOC_Os06g35550 // LOC_Os02g45040 // LOC_Os11g14090
GO:0044249	P	cellular biosynthetic process	242	1247	5899	24460	1	1	// LOC_Os07g48450 // LOC_Os04g35270 // LOC_Os05g04210 // LOC_Os01g64790 // LOC_Os01g09120 // LOC_Os12g09540 // LOC_Os04g57720 // LOC_Os02g11070 // LOC_Os08g38210 // LOC_Os05g48590 // LOC_Os06g17480 // LOC_Os09g31019 // LOC_Os01g68370 // LOC_Os05g37080 // LOC_Os05g30454 // LOC_Os07g05010 // LOC_Os11g01140 // LOC_Os07g48260 // LOC_Os03g08460 // LOC_Os12g29330 // LOC_Os09g30120 // LOC_Os08g19694 // …
GO:0006163	P	purine nucleotide metabolic process	7	1247	188	24460	0.84	1	// LOC_Os05g41580 // LOC_Os05g01030 // LOC_Os07g30970 // LOC_Os03g20949 // LOC_Os12g44300 // LOC_Os01g48530 // LOC_Os01g08190
GO:0009259	P	ribonucleotide metabolic process	7	1247	184	24460	0.82	1	// LOC_Os05g41580 // LOC_Os05g01030 // LOC_Os07g30970 // LOC_Os03g20949 // LOC_Os12g44300 // LOC_Os01g48530 // LOC_Os01g08190
GO:0006139	P	nucleobase, nucleoside, nucleotide and nucleic acid metabolic process	215	1247	6727	24460	1	1	// LOC_Os07g48450 // LOC_Os12g09540 // LOC_Os05g04210 // LOC_Os05g06940 // LOC_Os01g64790 // LOC_Os02g15560 // LOC_Os01g09120 // LOC_Os04g57720 // LOC_Os01g31420 // LOC_Os08g38210 // LOC_Os05g48590 // LOC_Os06g17480 // LOC_Os01g68370 // LOC_Os05g37080 // LOC_Os07g05010 // LOC_Os11g01140 // LOC_Os05g13970 // LOC_Os07g48260 // LOC_Os03g08460 // LOC_Os12g29330 // LOC_Os08g19694 // LOC_Os01g33810 // …
GO:0051641	P	cellular localization	11	1247	307	24460	0.91	1	// LOC_Os01g67810 // LOC_Os12g06840 // LOC_Os11g36400 // LOC_Os01g47730 // LOC_Os01g52250 // LOC_Os02g47110 // LOC_Os05g39760 // LOC_Os03g59660 // LOC_Os05g43820 // LOC_Os03g57310 // LOC_Os01g67820
GO:0006508	P	proteolysis	55	1247	3247	24460	1	1	// LOC_Os01g67810 // LOC_Os01g71090 // LOC_Os04g11240 // LOC_Os09g25640 // LOC_Os01g48750 // LOC_Os04g57440 // LOC_Os09g29710 // LOC_Os01g24570 // LOC_Os11g46910 // LOC_Os05g33400 // LOC_Os01g24550 // LOC_Os02g17150 // LOC_Os06g48650 // LOC_Os06g25760 // LOC_Os02g21040 // LOC_Os05g33410 // LOC_Os01g37960 // LOC_Os01g42320 // LOC_Os06g47620 // LOC_Os07g43240 // LOC_Os01g24600 // LOC_Os08g44640 // …
GO:0009987	P	cellular process	560	1247	12363	24460	1	1	// LOC_Os04g35270 // LOC_Os02g08364 // LOC_Os01g09120 // LOC_Os01g47760 // LOC_Os11g37870 // LOC_Os02g48210 // LOC_Os02g05980 // LOC_Os03g12470 // LOC_Os11g01140 // LOC_Os06g07040 // LOC_Os03g10950 // LOC_Os11g36150 // LOC_Os07g35004 // LOC_Os11g36090 // LOC_Os08g40270 // LOC_Os06g36000 // LOC_Os04g52780 // LOC_Os11g11940 // LOC_Os06g46270 // LOC_Os05g06940 // LOC_Os02g11070 // LOC_Os05g25390 // …
GO:0023046	P	signaling process	14	1247	318	24460	0.74	1	// LOC_Os07g05620 // LOC_Os06g12030 // LOC_Os05g09410 // LOC_Os01g47730 // LOC_Os02g36350 // LOC_Os05g26940 // LOC_Os06g44410 // LOC_Os11g01140 // LOC_Os01g09120 // LOC_Os02g47110 // LOC_Os05g43820 // LOC_Os04g57720 // LOC_Os06g43910 // LOC_Os12g01140
GO:0015031	P	protein transport	8	1247	291	24460	0.98	1	// LOC_Os03g38590 // LOC_Os01g47730 // LOC_Os01g52250 // LOC_Os02g47110 // LOC_Os05g39760 // LOC_Os03g59660 // LOC_Os05g43820 // LOC_Os03g57310
GO:0006325	P	chromatin organization	5	1247	983	24460	1	1	// LOC_Os04g13530 // LOC_Os02g02100 // LOC_Os07g08710 // LOC_Os06g23170 // LOC_Os02g12380
GO:0034613	P	cellular protein localization	7	1247	211	24460	0.91	1	// LOC_Os01g47730 // LOC_Os01g52250 // LOC_Os02g47110 // LOC_Os05g39760 // LOC_Os03g59660 // LOC_Os05g43820 // LOC_Os03g57310
GO:0023060	P	signal transmission	14	1247	318	24460	0.74	1	// LOC_Os07g05620 // LOC_Os06g12030 // LOC_Os05g09410 // LOC_Os01g47730 // LOC_Os02g36350 // LOC_Os05g26940 // LOC_Os06g44410 // LOC_Os11g01140 // LOC_Os01g09120 // LOC_Os02g47110 // LOC_Os05g43820 // LOC_Os04g57720 // LOC_Os06g43910 // LOC_Os12g01140
GO:0009058	P	biosynthetic process	257	1247	6082	24460	1	1	// LOC_Os07g48450 // LOC_Os04g35270 // LOC_Os05g04210 // LOC_Os01g64790 // LOC_Os01g09120 // LOC_Os12g09540 // LOC_Os04g57720 // LOC_Os02g11070 // LOC_Os08g38210 // LOC_Os05g48590 // LOC_Os06g17480 // LOC_Os09g31019 // LOC_Os01g68370 // LOC_Os05g37080 // LOC_Os05g30454 // LOC_Os07g05010 // LOC_Os11g01140 // LOC_Os07g48260 // LOC_Os03g08460 // LOC_Os12g29330 // LOC_Os09g30120 // LOC_Os06g02180 // …
GO:0009059	P	macromolecule biosynthetic process	204	1247	5252	24460	1	1	// LOC_Os07g48450 // LOC_Os04g35270 // LOC_Os05g04210 // LOC_Os01g64790 // LOC_Os01g09120 // LOC_Os04g57720 // LOC_Os01g31420 // LOC_Os08g38210 // LOC_Os06g17480 // LOC_Os01g68370 // LOC_Os05g37080 // LOC_Os07g05010 // LOC_Os11g01140 // LOC_Os07g48260 // LOC_Os03g08460 // LOC_Os12g29330 // LOC_Os09g30120 // LOC_Os08g19694 // LOC_Os01g33810 // LOC_Os03g20910 // LOC_Os06g36000 // LOC_Os06g06130 // …
GO:0051649	P	establishment of localization in cell	11	1247	299	24460	0.89	1	// LOC_Os01g67810 // LOC_Os12g06840 // LOC_Os11g36400 // LOC_Os01g47730 // LOC_Os01g52250 // LOC_Os02g47110 // LOC_Os05g39760 // LOC_Os03g59660 // LOC_Os05g43820 // LOC_Os03g57310 // LOC_Os01g67820
GO:0006996	P	organelle organization	6	1247	1101	24460	1	1	// LOC_Os02g55970 // LOC_Os02g12380 // LOC_Os04g13530 // LOC_Os06g23170 // LOC_Os02g02100 // LOC_Os07g08710
GO:0044238	P	primary metabolic process	573	1247	12303	24460	1	1	// LOC_Os04g35270 // LOC_Os02g08364 // LOC_Os09g25640 // LOC_Os01g61570 // LOC_Os11g19340 // LOC_Os01g09120 // LOC_Os05g48590 // LOC_Os11g47610 // LOC_Os04g09390 // LOC_Os02g48210 // LOC_Os02g05980 // LOC_Os08g40680 // LOC_Os03g12470 // LOC_Os11g01140 // LOC_Os06g07040 // LOC_Os03g10950 // LOC_Os11g36150 // LOC_Os07g35004 // LOC_Os11g36090 // LOC_Os08g40270 // LOC_Os06g36000 // LOC_Os04g52780 // …
GO:0051276	P	chromosome organization	5	1247	989	24460	1	1	// LOC_Os04g13530 // LOC_Os02g02100 // LOC_Os07g08710 // LOC_Os06g23170 // LOC_Os02g12380
GO:0006754	P	ATP biosynthetic process	5	1247	158	24460	0.9	1	// LOC_Os03g20949 // LOC_Os12g44300 // LOC_Os05g41580 // LOC_Os01g08190 // LOC_Os05g01030
GO:0044237	P	cellular metabolic process	494	1247	10813	24460	1	1	// LOC_Os04g35270 // LOC_Os02g08364 // LOC_Os01g09120 // LOC_Os02g48210 // LOC_Os02g05980 // LOC_Os03g12470 // LOC_Os11g01140 // LOC_Os06g07040 // LOC_Os03g10950 // LOC_Os11g36150 // LOC_Os07g35004 // LOC_Os01g33810 // LOC_Os08g40270 // LOC_Os06g36000 // LOC_Os04g52780 // LOC_Os07g12340 // LOC_Os05g06940 // LOC_Os02g11070 // LOC_Os05g25390 // LOC_Os06g06930 // LOC_Os06g46330 // LOC_Os12g03670 // …
GO:0006399	P	tRNA metabolic process	5	1247	154	24460	0.89	1	// LOC_Os06g06130 // LOC_Os09g27510 // LOC_Os03g53800 // LOC_Os05g12770 // LOC_Os03g12900
GO:0044085	P	cellular component biogenesis	9	1247	262	24460	0.91	1	// LOC_Os02g55970 // LOC_Os10g39770 // LOC_Os02g17534 // LOC_Os06g10930 // LOC_Os11g04070 // LOC_Os04g13530 // LOC_Os09g28460 // LOC_Os07g08710 // LOC_Os08g38720
GO:0006259	P	DNA metabolic process	22	1247	4448	24460	1	1	// LOC_Os04g11240 // LOC_Os07g02650 // LOC_Os07g34550 // LOC_Os02g15560 // LOC_Os01g31420 // LOC_Os01g08250 // LOC_Os11g31680 // LOC_Os03g36279 // LOC_Os06g25760 // LOC_Os12g19180 // LOC_Os06g35550 // LOC_Os12g16150 // LOC_Os11g14090 // LOC_Os05g10980 // LOC_Os11g32180 // LOC_Os02g02100 // LOC_Os12g20190 // LOC_Os04g54280 // LOC_Os02g51660 // LOC_Os06g23170 // LOC_Os02g45040 // LOC_Os02g18520
GO:0006412	P	translation	9	1247	683	24460	1	1	// LOC_Os03g53800 // LOC_Os12g42850 // LOC_Os09g27510 // LOC_Os06g06130 // LOC_Os09g31031 // LOC_Os11g04070 // LOC_Os04g57440 // LOC_Os09g31019 // LOC_Os05g12770
GO:0005506	F	iron ion binding	110	1247	733	24460	1.9e-21	3.1e-19	// LOC_Os06g32990 // LOC_Os11g05380 // LOC_Os05g33600 // LOC_Os03g49260 // LOC_Os02g07680 // LOC_Os07g45000 // LOC_Os02g30090 // LOC_Os03g58890 // LOC_Os03g25300 // LOC_Os03g13160 // LOC_Os06g48000 // LOC_Os07g23570 // LOC_Os08g36480 // LOC_Os12g05440 // LOC_Os12g02080 // LOC_Os07g44140 // LOC_Os01g22249 // LOC_Os03g25330 // LOC_Os04g59160 // LOC_Os11g04710 // LOC_Os06g48010 // LOC_Os03g49380 // …
GO:0009055	F	electron carrier activity	124	1247	919	24460	1.4e-20	1.1e-18	// LOC_Os02g38930 // LOC_Os06g32990 // LOC_Os11g05380 // LOC_Os06g33080 // LOC_Os03g49260 // LOC_Os01g47760 // LOC_Os07g45000 // LOC_Os02g30090 // LOC_Os03g25300 // LOC_Os05g33600 // LOC_Os01g24600 // LOC_Os06g48000 // LOC_Os07g23570 // LOC_Os08g36480 // LOC_Os12g05440 // LOC_Os12g02080 // LOC_Os07g44140 // LOC_Os08g44340 // LOC_Os01g22249 // LOC_Os08g04370 // LOC_Os03g25330 // LOC_Os04g59160 // …
GO:0020037	F	heme binding	95	1247	622	24460	4.3e-19	2.3e-17	// LOC_Os06g32990 // LOC_Os11g05380 // LOC_Os05g33600 // LOC_Os02g07680 // LOC_Os07g45000 // LOC_Os02g30090 // LOC_Os03g25300 // LOC_Os03g13160 // LOC_Os06g48000 // LOC_Os07g23570 // LOC_Os08g36480 // LOC_Os12g05440 // LOC_Os12g02080 // LOC_Os07g44140 // LOC_Os01g22249 // LOC_Os03g25330 // LOC_Os04g59160 // LOC_Os11g04710 // LOC_Os06g48010 // LOC_Os08g42030 // LOC_Os05g04470 // LOC_Os04g01550 // …
GO:0046906	F	tetrapyrrole binding	95	1247	629	24460	8.4e-19	3.4e-17	// LOC_Os06g32990 // LOC_Os11g05380 // LOC_Os05g33600 // LOC_Os02g07680 // LOC_Os07g45000 // LOC_Os02g30090 // LOC_Os03g25300 // LOC_Os03g13160 // LOC_Os06g48000 // LOC_Os07g23570 // LOC_Os08g36480 // LOC_Os12g05440 // LOC_Os12g02080 // LOC_Os07g44140 // LOC_Os01g22249 // LOC_Os03g25330 // LOC_Os04g59160 // LOC_Os11g04710 // LOC_Os06g48010 // LOC_Os08g42030 // LOC_Os05g04470 // LOC_Os04g01550 // …
GO:0016209	F	antioxidant activity	53	1247	219	24460	3e-18	9.5e-17	// LOC_Os06g32990 // LOC_Os08g42030 // LOC_Os04g59190 // LOC_Os07g47990 // LOC_Os01g57730 // LOC_Os07g49360 // LOC_Os04g59210 // LOC_Os01g16450 // LOC_Os12g35610 // LOC_Os05g04410 // LOC_Os07g48010 // LOC_Os05g04470 // LOC_Os07g48030 // LOC_Os07g01410 // LOC_Os03g25280 // LOC_Os07g44550 // LOC_Os07g44440 // LOC_Os04g59150 // LOC_Os03g25320 // LOC_Os06g33080 // LOC_Os07g48020 // LOC_Os06g32960 // …
GO:0004601	F	peroxidase activity	50	1247	201	24460	1e-17	2.4e-16	// LOC_Os06g32990 // LOC_Os08g42030 // LOC_Os04g59190 // LOC_Os07g47990 // LOC_Os01g57730 // LOC_Os07g49360 // LOC_Os04g59210 // LOC_Os01g16450 // LOC_Os12g35610 // LOC_Os05g04410 // LOC_Os07g48010 // LOC_Os05g04470 // LOC_Os07g48030 // LOC_Os07g01410 // LOC_Os03g25280 // LOC_Os07g44550 // LOC_Os04g59150 // LOC_Os03g25320 // LOC_Os06g33080 // LOC_Os07g48020 // LOC_Os06g32960 // LOC_Os03g25300 // …
GO:0016684	F	oxidoreductase activity, acting on peroxide as acceptor	50	1247	201	24460	1e-17	2.4e-16	// LOC_Os06g32990 // LOC_Os08g42030 // LOC_Os04g59190 // LOC_Os07g47990 // LOC_Os01g57730 // LOC_Os07g49360 // LOC_Os04g59210 // LOC_Os01g16450 // LOC_Os12g35610 // LOC_Os05g04410 // LOC_Os07g48010 // LOC_Os05g04470 // LOC_Os07g48030 // LOC_Os07g01410 // LOC_Os03g25280 // LOC_Os07g44550 // LOC_Os04g59150 // LOC_Os03g25320 // LOC_Os06g33080 // LOC_Os07g48020 // LOC_Os06g32960 // LOC_Os03g25300 // …
GO:0016491	F	oxidoreductase activity	193	1247	1995	24460	1.1e-16	2.3e-15	// LOC_Os02g38930 // LOC_Os06g32990 // LOC_Os11g05380 // LOC_Os05g05670 // LOC_Os05g33600 // LOC_Os01g65690 // LOC_Os03g49260 // LOC_Os06g11240 // LOC_Os01g47760 // LOC_Os07g45000 // LOC_Os02g30090 // LOC_Os03g58890 // LOC_Os05g08540 // LOC_Os02g26810 // LOC_Os09g32570 // LOC_Os03g25300 // LOC_Os03g08999 // LOC_Os12g35330 // LOC_Os12g16010 // LOC_Os09g37690 // LOC_Os11g10480 // LOC_Os06g48000 // …
GO:0004713	F	protein tyrosine kinase activity	148	1247	1426	24460	4.2e-15	7.5e-14	// LOC_Os05g40770 // LOC_Os03g17700 // LOC_Os04g52840 // LOC_Os12g14699 // LOC_Os11g03840 // LOC_Os08g40280 // LOC_Os02g48210 // LOC_Os02g05980 // LOC_Os03g12470 // LOC_Os09g18530 // LOC_Os11g01140 // LOC_Os07g35300 // LOC_Os12g10740 // LOC_Os11g36150 // LOC_Os02g02600 // LOC_Os07g35004 // LOC_Os11g36090 // LOC_Os08g40270 // LOC_Os02g01800 // LOC_Os08g03020 // LOC_Os01g04580 // LOC_Os11g39490 // …
GO:0004674	F	protein serine/threonine kinase activity	147	1247	1424	24460	7.9e-15	1.3e-13	// LOC_Os05g40770 // LOC_Os03g17700 // LOC_Os04g52840 // LOC_Os12g14699 // LOC_Os11g03840 // LOC_Os08g40280 // LOC_Os02g48210 // LOC_Os02g05980 // LOC_Os03g12470 // LOC_Os09g18530 // LOC_Os11g01140 // LOC_Os07g35300 // LOC_Os12g10740 // LOC_Os11g36150 // LOC_Os02g02600 // LOC_Os07g35004 // LOC_Os11g36090 // LOC_Os08g40270 // LOC_Os02g01800 // LOC_Os08g03020 // LOC_Os01g04580 // LOC_Os11g39490 // …
GO:0016301	F	kinase activity	165	1247	1756	24460	2.7e-13	3.9e-12	// LOC_Os05g40770 // LOC_Os03g17700 // LOC_Os04g52840 // LOC_Os12g14699 // LOC_Os11g03840 // LOC_Os08g40280 // LOC_Os02g48210 // LOC_Os02g05980 // LOC_Os03g12470 // LOC_Os09g18530 // LOC_Os11g01140 // LOC_Os07g35300 // LOC_Os12g10740 // LOC_Os11g36150 // LOC_Os02g02600 // LOC_Os07g35004 // LOC_Os11g36090 // LOC_Os08g40270 // LOC_Os02g01800 // LOC_Os08g03020 // LOC_Os01g04580 // LOC_Os11g39490 // …
GO:0004672	F	protein kinase activity	151	1247	1587	24460	1.3e-12	1.8e-11	// LOC_Os05g40770 // LOC_Os03g17700 // LOC_Os04g52840 // LOC_Os12g14699 // LOC_Os11g03840 // LOC_Os08g40280 // LOC_Os02g48210 // LOC_Os02g05980 // LOC_Os03g12470 // LOC_Os09g18530 // LOC_Os11g01140 // LOC_Os07g35300 // LOC_Os12g10740 // LOC_Os11g36150 // LOC_Os02g02600 // LOC_Os07g35004 // LOC_Os11g36090 // LOC_Os08g40270 // LOC_Os02g01800 // LOC_Os08g03020 // LOC_Os01g04580 // LOC_Os11g39490 // …
GO:0016773	F	phosphotransferase activity, alcohol group as acceptor	161	1247	1738	24460	1.6e-12	1.9e-11	// LOC_Os05g40770 // LOC_Os03g17700 // LOC_Os04g52840 // LOC_Os12g14699 // LOC_Os11g03840 // LOC_Os08g40280 // LOC_Os02g48210 // LOC_Os02g05980 // LOC_Os03g12470 // LOC_Os09g18530 // LOC_Os11g01140 // LOC_Os07g35300 // LOC_Os12g10740 // LOC_Os11g36150 // LOC_Os02g02600 // LOC_Os07g35004 // LOC_Os11g36090 // LOC_Os08g40270 // LOC_Os02g01800 // LOC_Os08g03020 // LOC_Os01g04580 // LOC_Os11g39490 // …
GO:0003700	F	transcription factor activity	84	1247	682	24460	2.5e-12	2.8e-11	// LOC_Os01g59350 // LOC_Os09g35910 // LOC_Os10g18099 // LOC_Os01g54600 // LOC_Os08g43210 // LOC_Os01g51690 // LOC_Os01g64790 // LOC_Os01g63510 // LOC_Os01g04750 // LOC_Os01g10370 // LOC_Os01g21120 // LOC_Os07g48260 // LOC_Os12g44300 // LOC_Os06g10780 // LOC_Os01g14440 // LOC_Os05g38120 // LOC_Os02g08440 // LOC_Os11g14090 // LOC_Os08g36700 // LOC_Os03g10210 // LOC_Os01g53040 // LOC_Os03g21800 // …
GO:0030528	F	transcription regulator activity	108	1247	1037	24460	2.5e-11	2.6e-10	// LOC_Os01g64790 // LOC_Os01g61080 // LOC_Os04g57720 // LOC_Os08g38210 // LOC_Os09g35910 // LOC_Os07g05010 // LOC_Os03g51690 // LOC_Os07g48260 // LOC_Os03g08460 // LOC_Os04g46250 // LOC_Os06g36000 // LOC_Os01g04800 // LOC_Os01g19694 // LOC_Os02g13710 // LOC_Os01g40260 // LOC_Os10g23090 // LOC_Os10g18099 // LOC_Os08g01700 // LOC_Os01g09100 // LOC_Os05g39720 // LOC_Os01g04750 // LOC_Os01g10370 // …
GO:0001883	F	purine nucleoside binding	240	1247	3210	24460	2.4e-09	2.3e-08	// LOC_Os12g09540 // LOC_Os06g48060 // LOC_Os03g17700 // LOC_Os07g09900 // LOC_Os11g05700 // LOC_Os04g52840 // LOC_Os12g14699 // LOC_Os05g40770 // LOC_Os11g41170 // LOC_Os11g12330 // LOC_Os08g40280 // LOC_Os09g24330 // LOC_Os12g06920 // LOC_Os11g37870 // LOC_Os02g48210 // LOC_Os02g05980 // LOC_Os12g32790 // LOC_Os01g12660 // LOC_Os03g12470 // LOC_Os09g18530 // LOC_Os11g01140 // LOC_Os07g35300 // …
GO:0030554	F	adenyl nucleotide binding	240	1247	3210	24460	2.4e-09	2.3e-08	// LOC_Os12g09540 // LOC_Os06g48060 // LOC_Os03g17700 // LOC_Os07g09900 // LOC_Os11g05700 // LOC_Os04g52840 // LOC_Os12g14699 // LOC_Os05g40770 // LOC_Os11g41170 // LOC_Os11g12330 // LOC_Os08g40280 // LOC_Os09g24330 // LOC_Os12g06920 // LOC_Os11g37870 // LOC_Os02g48210 // LOC_Os02g05980 // LOC_Os12g32790 // LOC_Os01g12660 // LOC_Os03g12470 // LOC_Os09g18530 // LOC_Os11g01140 // LOC_Os07g35300 // …
GO:0001882	F	nucleoside binding	240	1247	3220	24460	3.1e-09	2.8e-08	// LOC_Os12g09540 // LOC_Os06g48060 // LOC_Os03g17700 // LOC_Os07g09900 // LOC_Os11g05700 // LOC_Os04g52840 // LOC_Os12g14699 // LOC_Os05g40770 // LOC_Os11g41170 // LOC_Os11g12330 // LOC_Os08g40280 // LOC_Os09g24330 // LOC_Os12g06920 // LOC_Os11g37870 // LOC_Os02g48210 // LOC_Os02g05980 // LOC_Os12g32790 // LOC_Os01g12660 // LOC_Os03g12470 // LOC_Os09g18530 // LOC_Os11g01140 // LOC_Os07g35300 // …
GO:0017076	F	purine nucleotide binding	245	1247	3394	24460	2.9e-08	2.5e-07	// LOC_Os12g09540 // LOC_Os06g48060 // LOC_Os03g17700 // LOC_Os07g09900 // LOC_Os11g05700 // LOC_Os04g52840 // LOC_Os12g14699 // LOC_Os05g40770 // LOC_Os11g41170 // LOC_Os11g12330 // LOC_Os08g40280 // LOC_Os09g24330 // LOC_Os12g06920 // LOC_Os11g37870 // LOC_Os02g48210 // LOC_Os02g05980 // LOC_Os12g32790 // LOC_Os01g12660 // LOC_Os03g12470 // LOC_Os09g18530 // LOC_Os11g01140 // LOC_Os07g35300 // …
GO:0000166	F	nucleotide binding	265	1247	3794	24460	1.1e-07	8.3e-07	// LOC_Os12g09540 // LOC_Os06g48060 // LOC_Os03g17700 // LOC_Os07g09900 // LOC_Os11g05700 // LOC_Os04g52840 // LOC_Os12g14699 // LOC_Os06g11240 // LOC_Os05g40770 // LOC_Os11g41170 // LOC_Os11g12330 // LOC_Os08g40280 // LOC_Os09g24330 // LOC_Os12g06920 // LOC_Os11g37870 // LOC_Os02g48210 // LOC_Os02g05980 // LOC_Os11g07120 // LOC_Os01g12660 // LOC_Os03g12470 // LOC_Os09g18530 // LOC_Os06g44410 // …
GO:0032559	F	adenyl ribonucleotide binding	222	1247	3058	24460	1e-07	8.3e-07	// LOC_Os12g09540 // LOC_Os06g48060 // LOC_Os03g17700 // LOC_Os07g09900 // LOC_Os11g05700 // LOC_Os04g52840 // LOC_Os12g14699 // LOC_Os05g40770 // LOC_Os11g12330 // LOC_Os08g40280 // LOC_Os12g06920 // LOC_Os11g37870 // LOC_Os02g48210 // LOC_Os02g05980 // LOC_Os12g32790 // LOC_Os01g12660 // LOC_Os03g12470 // LOC_Os09g18530 // LOC_Os11g01140 // LOC_Os07g35300 // LOC_Os12g10740 // LOC_Os11g36150 // …
GO:0005524	F	ATP binding	221	1247	3055	24460	1.4e-07	1.1e-06	// LOC_Os12g09540 // LOC_Os06g48060 // LOC_Os03g17700 // LOC_Os07g09900 // LOC_Os11g05700 // LOC_Os04g52840 // LOC_Os12g14699 // LOC_Os05g40770 // LOC_Os11g12330 // LOC_Os08g40280 // LOC_Os12g06920 // LOC_Os11g37870 // LOC_Os02g48210 // LOC_Os02g05980 // LOC_Os12g32790 // LOC_Os01g12660 // LOC_Os03g12470 // LOC_Os09g18530 // LOC_Os11g01140 // LOC_Os07g35300 // LOC_Os12g10740 // LOC_Os11g36150 // …
GO:0032555	F	purine ribonucleotide binding	227	1247	3238	24460	9e-07	6e-06	// LOC_Os12g09540 // LOC_Os06g48060 // LOC_Os03g17700 // LOC_Os07g09900 // LOC_Os11g05700 // LOC_Os04g52840 // LOC_Os12g14699 // LOC_Os05g40770 // LOC_Os11g12330 // LOC_Os08g40280 // LOC_Os12g06920 // LOC_Os11g37870 // LOC_Os02g48210 // LOC_Os02g05980 // LOC_Os12g32790 // LOC_Os01g12660 // LOC_Os03g12470 // LOC_Os09g18530 // LOC_Os11g01140 // LOC_Os07g35300 // LOC_Os12g10740 // LOC_Os11g36150 // …
GO:0032553	F	ribonucleotide binding	227	1247	3238	24460	9e-07	6e-06	// LOC_Os12g09540 // LOC_Os06g48060 // LOC_Os03g17700 // LOC_Os07g09900 // LOC_Os11g05700 // LOC_Os04g52840 // LOC_Os12g14699 // LOC_Os05g40770 // LOC_Os11g12330 // LOC_Os08g40280 // LOC_Os12g06920 // LOC_Os11g37870 // LOC_Os02g48210 // LOC_Os02g05980 // LOC_Os12g32790 // LOC_Os01g12660 // LOC_Os03g12470 // LOC_Os09g18530 // LOC_Os11g01140 // LOC_Os07g35300 // LOC_Os12g10740 // LOC_Os11g36150 // …
GO:0004497	F	monooxygenase activity	48	1247	423	24460	1.1e-06	7.2e-06	// LOC_Os02g38930 // LOC_Os06g02019 // LOC_Os01g67030 // LOC_Os03g55800 // LOC_Os11g41680 // LOC_Os05g33600 // LOC_Os09g27510 // LOC_Os11g05380 // LOC_Os07g48330 // LOC_Os02g12550 // LOC_Os02g07680 // LOC_Os07g45000 // LOC_Os06g46680 // LOC_Os02g30090 // LOC_Os02g26770 // LOC_Os10g36740 // LOC_Os01g10040 // LOC_Os01g67550 // LOC_Os02g09310 // LOC_Os05g37250 // LOC_Os02g26810 // LOC_Os08g33300 // …
GO:0004553	F	hydrolase activity, hydrolyzing O-glycosyl compounds	49	1247	454	24460	3.1e-06	1.9e-05	// LOC_Os02g33110 // LOC_Os08g36910 // LOC_Os04g33640 // LOC_Os03g20420 // LOC_Os11g47600 // LOC_Os11g47580 // LOC_Os10g39840 // LOC_Os02g03870 // LOC_Os04g09390 // LOC_Os01g71830 // LOC_Os11g37940 // LOC_Os02g39330 // LOC_Os01g65460 // LOC_Os11g47520 // LOC_Os01g51570 // LOC_Os10g22570 // LOC_Os11g47500 // LOC_Os04g41970 // LOC_Os07g23944 // LOC_Os03g57880 // LOC_Os11g47560 // LOC_Os07g35350 // …
GO:0048037	F	cofactor binding	54	1247	547	24460	1.1e-05	6.5e-05	// LOC_Os10g33540 // LOC_Os03g51740 // LOC_Os06g11280 // LOC_Os01g06660 // LOC_Os01g07500 // LOC_Os06g11240 // LOC_Os06g35650 // LOC_Os12g35610 // LOC_Os05g39310 // LOC_Os03g57680 // LOC_Os06g11200 // LOC_Os02g14110 // LOC_Os03g53650 // LOC_Os06g35630 // LOC_Os04g53850 // LOC_Os03g12900 // LOC_Os11g37890 // LOC_Os12g08850 // LOC_Os06g11210 // LOC_Os03g18220 // LOC_Os04g55720 // LOC_Os03g13300 // …
GO:0043565	F	sequence-specific DNA binding	47	1247	455	24460	1.4e-05	8e-05	// LOC_Os10g18099 // LOC_Os01g54600 // LOC_Os01g09100 // LOC_Os01g63510 // LOC_Os11g05480 // LOC_Os07g48260 // LOC_Os12g44300 // LOC_Os01g14440 // LOC_Os05g38120 // LOC_Os02g08440 // LOC_Os01g60270 // LOC_Os08g36700 // LOC_Os03g10210 // LOC_Os01g53040 // LOC_Os03g21800 // LOC_Os03g51690 // LOC_Os06g17480 // LOC_Os09g35910 // LOC_Os05g49420 // LOC_Os05g49100 // LOC_Os07g03770 // LOC_Os05g14370 // …
GO:0050662	F	coenzyme binding	41	1247	380	24460	2e-05	0.00011	// LOC_Os10g33540 // LOC_Os06g11280 // LOC_Os01g06660 // LOC_Os06g11240 // LOC_Os06g35650 // LOC_Os12g35610 // LOC_Os05g39310 // LOC_Os03g57680 // LOC_Os06g11200 // LOC_Os06g35630 // LOC_Os04g53850 // LOC_Os03g12900 // LOC_Os11g37890 // LOC_Os06g11210 // LOC_Os04g55720 // LOC_Os08g40180 // LOC_Os05g09440 // LOC_Os06g35550 // LOC_Os02g56700 // LOC_Os02g56460 // LOC_Os02g38920 // LOC_Os06g11290 // …
GO:0016757	F	transferase activity, transferring glycosyl groups	53	1247	547	24460	2.1e-05	0.00011	// LOC_Os11g30760 // LOC_Os07g36740 // LOC_Os04g35270 // LOC_Os09g30120 // LOC_Os02g17534 // LOC_Os01g52250 // LOC_Os06g27560 // LOC_Os01g53430 // LOC_Os01g72610 // LOC_Os07g30369 // LOC_Os11g04860 // LOC_Os07g45260 // LOC_Os06g09450 // LOC_Os09g27950 // LOC_Os10g39840 // LOC_Os09g28460 // LOC_Os01g43280 // LOC_Os01g02930 // LOC_Os01g02920 // LOC_Os03g12820 // LOC_Os01g02900 // LOC_Os02g14630 // …
GO:0016798	F	hydrolase activity, acting on glycosyl bonds	49	1247	503	24460	3.7e-05	0.00019	// LOC_Os02g33110 // LOC_Os08g36910 // LOC_Os04g33640 // LOC_Os03g20420 // LOC_Os11g47600 // LOC_Os11g47580 // LOC_Os10g39840 // LOC_Os02g03870 // LOC_Os04g09390 // LOC_Os01g71830 // LOC_Os11g37940 // LOC_Os02g39330 // LOC_Os01g65460 // LOC_Os11g47520 // LOC_Os01g51570 // LOC_Os10g22570 // LOC_Os11g47500 // LOC_Os04g41970 // LOC_Os07g23944 // LOC_Os03g57880 // LOC_Os11g47560 // LOC_Os07g35350 // …
GO:0005509	F	calcium ion binding	40	1247	381	24460	4.3e-05	0.00022	// LOC_Os08g36910 // LOC_Os02g56370 // LOC_Os09g31025 // LOC_Os09g31000 // LOC_Os12g35610 // LOC_Os09g31040 // LOC_Os09g30506 // LOC_Os03g20370 // LOC_Os06g11800 // LOC_Os09g38800 // LOC_Os03g57450 // LOC_Os11g47110 // LOC_Os09g38840 // LOC_Os05g44220 // LOC_Os07g23944 // LOC_Os03g44140 // LOC_Os02g50140 // LOC_Os03g53200 // LOC_Os08g39290 // LOC_Os06g11030 // LOC_Os05g24780 // LOC_Os09g30490 // …
GO:0016758	F	transferase activity, transferring hexosyl groups	41	1247	450	24460	0.00055	0.0027	// LOC_Os11g30760 // LOC_Os07g36740 // LOC_Os04g35270 // LOC_Os09g30120 // LOC_Os02g17534 // LOC_Os01g52250 // LOC_Os03g49550 // LOC_Os01g53430 // LOC_Os09g26310 // LOC_Os07g30369 // LOC_Os11g04860 // LOC_Os02g36810 // LOC_Os06g09450 // LOC_Os09g27950 // LOC_Os10g39840 // LOC_Os09g28460 // LOC_Os01g43280 // LOC_Os02g14630 // LOC_Os01g08100 // LOC_Os03g22120 // LOC_Os01g64910 // LOC_Os01g41430 // …
GO:0050660	F	FAD binding	19	1247	153	24460	0.00072	0.0034	// LOC_Os10g33540 // LOC_Os03g57680 // LOC_Os11g33120 // LOC_Os06g35630 // LOC_Os06g35650 // LOC_Os08g36480 // LOC_Os10g25780 // LOC_Os07g25540 // LOC_Os08g06170 // LOC_Os06g35550 // LOC_Os03g12900 // LOC_Os05g48200 // LOC_Os12g35610 // LOC_Os08g44340 // LOC_Os05g45240 // LOC_Os06g35700 // LOC_Os09g37690 // LOC_Os01g56810 // LOC_Os06g35560
GO:0030246	F	carbohydrate binding	31	1247	327	24460	0.0014	0.0064	// LOC_Os12g44320 // LOC_Os11g10290 // LOC_Os04g53994 // LOC_Os10g01100 // LOC_Os11g03840 // LOC_Os03g18910 // LOC_Os08g40280 // LOC_Os04g09390 // LOC_Os02g48210 // LOC_Os02g39330 // LOC_Os04g28780 // LOC_Os01g65460 // LOC_Os02g32680 // LOC_Os09g28180 // LOC_Os08g40270 // LOC_Os05g07300 // LOC_Os01g48040 // LOC_Os08g03020 // LOC_Os12g38610 // LOC_Os01g48000 // LOC_Os10g35460 // LOC_Os08g02996 // …
GO:0005529	F	sugar binding	27	1247	272	24460	0.0015	0.0067	// LOC_Os12g44320 // LOC_Os11g10290 // LOC_Os04g53994 // LOC_Os10g01100 // LOC_Os11g03840 // LOC_Os08g40280 // LOC_Os02g48210 // LOC_Os04g28780 // LOC_Os01g65460 // LOC_Os02g32680 // LOC_Os09g28180 // LOC_Os08g40270 // LOC_Os05g07300 // LOC_Os01g48040 // LOC_Os08g03020 // LOC_Os12g38610 // LOC_Os01g48000 // LOC_Os08g02996 // LOC_Os06g37670 // LOC_Os06g06930 // LOC_Os02g48200 // LOC_Os01g72810 // …
GO:0016705	F	oxidoreductase activity, acting on paired donors, with incorporation or reduction of molecular oxygen	10	1247	63	24460	0.0027	0.012	// LOC_Os01g65830 // LOC_Os08g10010 // LOC_Os07g09630 // LOC_Os03g58890 // LOC_Os03g12900 // LOC_Os03g58880 // LOC_Os07g25540 // LOC_Os01g67030 // LOC_Os09g37690 // LOC_Os02g58070
GO:0030414	F	peptidase inhibitor activity	12	1247	90	24460	0.0039	0.016	// LOC_Os01g68670 // LOC_Os01g03340 // LOC_Os01g03390 // LOC_Os01g03360 // LOC_Os12g25090 // LOC_Os04g57440 // LOC_Os01g42860 // LOC_Os02g32690 // LOC_Os01g03330 // LOC_Os04g28250 // LOC_Os11g12410 // LOC_Os01g58890
GO:0015171	F	amino acid transmembrane transporter activity	6	1247	27	24460	0.0046	0.019	// LOC_Os04g35540 // LOC_Os12g42850 // LOC_Os01g11160 // LOC_Os03g43970 // LOC_Os11g05690 // LOC_Os01g42234
GO:0005275	F	amine transmembrane transporter activity	6	1247	27	24460	0.0046	0.019	// LOC_Os04g35540 // LOC_Os12g42850 // LOC_Os01g11160 // LOC_Os03g43970 // LOC_Os11g05690 // LOC_Os01g42234
GO:0015035	F	protein disulfide oxidoreductase activity	8	1247	52	24460	0.0082	0.032	// LOC_Os06g12030 // LOC_Os05g48930 // LOC_Os11g43520 // LOC_Os02g40500 // LOC_Os12g35340 // LOC_Os01g09830 // LOC_Os01g47760 // LOC_Os12g35330
GO:0004866	F	endopeptidase inhibitor activity	11	1247	88	24460	0.0085	0.033	// LOC_Os01g03340 // LOC_Os01g03390 // LOC_Os01g03360 // LOC_Os12g25090 // LOC_Os01g68670 // LOC_Os01g42860 // LOC_Os02g32690 // LOC_Os01g03330 // LOC_Os04g28250 // LOC_Os11g12410 // LOC_Os01g58890
GO:0004857	F	enzyme inhibitor activity	17	1247	170	24460	0.0098	0.036	// LOC_Os01g68670 // LOC_Os01g03340 // LOC_Os01g03330 // LOC_Os01g03390 // LOC_Os01g03360 // LOC_Os01g20980 // LOC_Os12g25090 // LOC_Os04g57440 // LOC_Os01g42860 // LOC_Os02g32690 // LOC_Os12g18560 // LOC_Os02g18650 // LOC_Os04g28250 // LOC_Os11g12410 // LOC_Os01g58890 // LOC_Os08g34910 // LOC_Os08g34900
GO:0015036	F	disulfide oxidoreductase activity	8	1247	54	24460	0.0099	0.036	// LOC_Os06g12030 // LOC_Os05g48930 // LOC_Os11g43520 // LOC_Os02g40500 // LOC_Os12g35340 // LOC_Os01g09830 // LOC_Os01g47760 // LOC_Os12g35330
GO:0010181	F	FMN binding	6	1247	33	24460	0.011	0.038	// LOC_Os06g11290 // LOC_Os06g11280 // LOC_Os06g11240 // LOC_Os05g48200 // LOC_Os06g11210 // LOC_Os06g11200
GO:0016769	F	transferase activity, transferring nitrogenous groups	8	1247	58	24460	0.014	0.05	// LOC_Os02g14110 // LOC_Os03g51740 // LOC_Os03g12890 // LOC_Os10g25130 // LOC_Os01g70370 // LOC_Os01g55540 // LOC_Os06g35540 // LOC_Os04g47190
GO:0005342	F	organic acid transmembrane transporter activity	6	1247	37	24460	0.017	0.057	// LOC_Os04g35540 // LOC_Os12g42850 // LOC_Os01g11160 // LOC_Os03g43970 // LOC_Os11g05690 // LOC_Os01g42234
GO:0046943	F	carboxylic acid transmembrane transporter activity	6	1247	37	24460	0.017	0.057	// LOC_Os04g35540 // LOC_Os12g42850 // LOC_Os01g11160 // LOC_Os03g43970 // LOC_Os11g05690 // LOC_Os01g42234
GO:0015079	F	potassium ion transmembrane transporter activity	5	1247	30	24460	0.026	0.085	// LOC_Os04g32920 // LOC_Os04g52120 // LOC_Os06g48810 // LOC_Os07g47350 // LOC_Os07g48130
GO:0008483	F	transaminase activity	5	1247	32	24460	0.032	0.1	// LOC_Os02g14110 // LOC_Os06g35540 // LOC_Os04g47190 // LOC_Os01g55540 // LOC_Os03g12890
GO:0046527	F	glucosyltransferase activity	8	1247	69	24460	0.033	0.1	// LOC_Os07g36740 // LOC_Os03g22120 // LOC_Os09g30120 // LOC_Os06g09450 // LOC_Os01g52250 // LOC_Os07g36610 // LOC_Os05g44210 // LOC_Os06g02180
GO:0016830	F	carbon-carbon lyase activity	10	1247	96	24460	0.033	0.1	// LOC_Os05g39320 // LOC_Os02g05830 // LOC_Os01g06660 // LOC_Os01g67860 // LOC_Os08g02700 // LOC_Os03g18220 // LOC_Os02g36340 // LOC_Os10g13700 // LOC_Os03g13300 // LOC_Os05g39310
GO:0004867	F	serine-type endopeptidase inhibitor activity	8	1247	69	24460	0.033	0.1	// LOC_Os01g03340 // LOC_Os01g03390 // LOC_Os01g03360 // LOC_Os12g25090 // LOC_Os01g42860 // LOC_Os02g32690 // LOC_Os01g03330 // LOC_Os11g12410
GO:0005507	F	copper ion binding	13	1247	139	24460	0.034	0.1	// LOC_Os08g37670 // LOC_Os08g37660 // LOC_Os08g04340 // LOC_Os08g04350 // LOC_Os09g32952 // LOC_Os09g39940 // LOC_Os08g04370 // LOC_Os01g03630 // LOC_Os01g03620 // LOC_Os04g40040 // LOC_Os08g04360 // LOC_Os09g20090 // LOC_Os01g03640
GO:0003993	F	acid phosphatase activity	6	1247	45	24460	0.036	0.11	// LOC_Os12g44050 // LOC_Os01g56880 // LOC_Os05g09724 // LOC_Os12g38760 // LOC_Os12g38770 // LOC_Os12g44020
GO:0030599	F	pectinesterase activity	10	1247	98	24460	0.037	0.11	// LOC_Os01g20980 // LOC_Os03g19610 // LOC_Os09g37360 // LOC_Os11g45730 // LOC_Os12g18560 // LOC_Os09g39760 // LOC_Os10g26680 // LOC_Os02g18650 // LOC_Os08g34910 // LOC_Os08g34900
GO:0000287	F	magnesium ion binding	13	1247	142	24460	0.039	0.11	// LOC_Os12g05110 // LOC_Os04g09900 // LOC_Os03g18220 // LOC_Os01g06660 // LOC_Os04g27720 // LOC_Os04g58110 // LOC_Os05g39320 // LOC_Os03g20949 // LOC_Os05g39310 // LOC_Os11g05110 // LOC_Os05g01030 // LOC_Os11g28530 // LOC_Os01g16960
GO:0035251	F	UDP-glucosyltransferase activity	7	1247	59	24460	0.04	0.11	// LOC_Os07g36740 // LOC_Os03g22120 // LOC_Os09g30120 // LOC_Os06g09450 // LOC_Os07g36610 // LOC_Os05g44210 // LOC_Os06g02180
GO:0003824	F	catalytic activity	718	1247	13462	24460	0.042	0.11	// LOC_Os04g35270 // LOC_Os02g08364 // LOC_Os09g25640 // LOC_Os01g61570 // LOC_Os11g19340 // LOC_Os01g47760 // LOC_Os06g35700 // LOC_Os11g47610 // LOC_Os04g09390 // LOC_Os02g48210 // LOC_Os02g05980 // LOC_Os08g40680 // LOC_Os03g12470 // LOC_Os11g01140 // LOC_Os08g40270 // LOC_Os03g10950 // LOC_Os11g36150 // LOC_Os07g35004 // LOC_Os09g37690 // LOC_Os11g10480 // LOC_Os11g36090 // LOC_Os10g28370 // …
GO:0016667	F	oxidoreductase activity, acting on sulfur group of donors	8	1247	73	24460	0.043	0.11	// LOC_Os06g12030 // LOC_Os05g48930 // LOC_Os11g43520 // LOC_Os02g40500 // LOC_Os12g35340 // LOC_Os01g09830 // LOC_Os01g47760 // LOC_Os12g35330
GO:0019200	F	carbohydrate kinase activity	5	1247	35	24460	0.043	0.11	// LOC_Os05g44922 // LOC_Os06g13810 // LOC_Os04g51880 // LOC_Os08g25720 // LOC_Os05g10650
GO:0016829	F	lyase activity	22	1247	286	24460	0.046	0.12	// LOC_Os03g51740 // LOC_Os01g06660 // LOC_Os01g07500 // LOC_Os05g39310 // LOC_Os03g53650 // LOC_Os10g13700 // LOC_Os03g13300 // LOC_Os10g08550 // LOC_Os02g41670 // LOC_Os11g28530 // LOC_Os02g05830 // LOC_Os01g67860 // LOC_Os04g59300 // LOC_Os04g27720 // LOC_Os04g09900 // LOC_Os05g39320 // LOC_Os06g05690 // LOC_Os02g41650 // LOC_Os08g02700 // LOC_Os10g25130 // LOC_Os02g36340 // LOC_Os03g18220
GO:0016597	F	amino acid binding	9	1247	93	24460	0.06	0.15	// LOC_Os08g42080 // LOC_Os05g07120 // LOC_Os02g02780 // LOC_Os05g02220 // LOC_Os12g02020 // LOC_Os04g55720 // LOC_Os03g38540 // LOC_Os11g02054 // LOC_Os04g32110
GO:0008194	F	UDP-glycosyltransferase activity	9	1247	93	24460	0.06	0.15	// LOC_Os02g38140 // LOC_Os07g36740 // LOC_Os03g22120 // LOC_Os09g30120 // LOC_Os06g09450 // LOC_Os07g36610 // LOC_Os05g44210 // LOC_Os06g02180 // LOC_Os01g56570
GO:0043176	F	amine binding	9	1247	93	24460	0.06	0.15	// LOC_Os08g42080 // LOC_Os05g07120 // LOC_Os02g02780 // LOC_Os05g02220 // LOC_Os12g02020 // LOC_Os04g55720 // LOC_Os03g38540 // LOC_Os11g02054 // LOC_Os04g32110
GO:0016831	F	carboxy-lyase activity	7	1247	66	24460	0.063	0.15	// LOC_Os05g39320 // LOC_Os02g05830 // LOC_Os01g06660 // LOC_Os03g18220 // LOC_Os10g13700 // LOC_Os03g13300 // LOC_Os05g39310
GO:0019842	F	vitamin binding	17	1247	217	24460	0.064	0.15	// LOC_Os02g14110 // LOC_Os03g51740 // LOC_Os01g06660 // LOC_Os10g25130 // LOC_Os01g70370 // LOC_Os03g53650 // LOC_Os12g08850 // LOC_Os01g07500 // LOC_Os05g39320 // LOC_Os03g13300 // LOC_Os05g39310 // LOC_Os01g55540 // LOC_Os06g35540 // LOC_Os01g52900 // LOC_Os06g05690 // LOC_Os03g18220 // LOC_Os03g38540
GO:0030170	F	pyridoxal phosphate binding	12	1247	140	24460	0.067	0.16	// LOC_Os02g14110 // LOC_Os03g51740 // LOC_Os10g25130 // LOC_Os01g70370 // LOC_Os03g53650 // LOC_Os12g08850 // LOC_Os01g07500 // LOC_Os03g13300 // LOC_Os01g55540 // LOC_Os06g35540 // LOC_Os01g52900 // LOC_Os06g05690
GO:0070279	F	vitamin B6 binding	12	1247	140	24460	0.067	0.16	// LOC_Os02g14110 // LOC_Os03g51740 // LOC_Os10g25130 // LOC_Os01g70370 // LOC_Os03g53650 // LOC_Os12g08850 // LOC_Os01g07500 // LOC_Os03g13300 // LOC_Os01g55540 // LOC_Os06g35540 // LOC_Os01g52900 // LOC_Os06g05690
GO:0004842	F	ubiquitin-protein ligase activity	9	1247	96	24460	0.069	0.16	// LOC_Os02g57700 // LOC_Os03g13740 // LOC_Os02g46500 // LOC_Os02g50460 // LOC_Os04g34030 // LOC_Os04g58920 // LOC_Os10g03440 // LOC_Os02g33590 // LOC_Os02g34410
GO:0050661	F	NADP or NADPH binding	5	1247	41	24460	0.071	0.16	// LOC_Os09g31970 // LOC_Os09g37690 // LOC_Os10g35840 // LOC_Os08g40180 // LOC_Os07g25540
GO:0004197	F	cysteine-type endopeptidase activity	8	1247	86	24460	0.086	0.19	// LOC_Os09g39070 // LOC_Os01g71130 // LOC_Os04g57440 // LOC_Os09g39120 // LOC_Os01g24570 // LOC_Os01g24560 // LOC_Os01g24600 // LOC_Os01g24550
GO:0031406	F	carboxylic acid binding	9	1247	101	24460	0.087	0.19	// LOC_Os08g42080 // LOC_Os05g07120 // LOC_Os02g02780 // LOC_Os05g02220 // LOC_Os12g02020 // LOC_Os04g55720 // LOC_Os03g38540 // LOC_Os11g02054 // LOC_Os04g32110
GO:0008134	F	transcription factor binding	5	1247	44	24460	0.088	0.19	// LOC_Os10g31864 // LOC_Os08g19694 // LOC_Os09g39190 // LOC_Os01g47730 // LOC_Os04g40630
GO:0004091	F	carboxylesterase activity	14	1247	181	24460	0.093	0.2	// LOC_Os06g14490 // LOC_Os01g20980 // LOC_Os03g19610 // LOC_Os09g37360 // LOC_Os11g19340 // LOC_Os04g57440 // LOC_Os11g45730 // LOC_Os09g39760 // LOC_Os10g26680 // LOC_Os02g18650 // LOC_Os12g18560 // LOC_Os10g28370 // LOC_Os08g34910 // LOC_Os08g34900
GO:0022857	F	transmembrane transporter activity	45	1247	722	24460	0.11	0.23	// LOC_Os04g32920 // LOC_Os04g35540 // LOC_Os07g39350 // LOC_Os01g11160 // LOC_Os01g08190 // LOC_Os01g56420 // LOC_Os11g05700 // LOC_Os05g01030 // LOC_Os08g37432 // LOC_Os12g44300 // LOC_Os06g48810 // LOC_Os07g48130 // LOC_Os01g42234 // LOC_Os12g42200 // LOC_Os01g61510 // LOC_Os10g20470 // LOC_Os11g05690 // LOC_Os10g30770 // LOC_Os05g41580 // LOC_Os06g48060 // LOC_Os03g43970 // LOC_Os07g37100 // …
GO:0045735	F	nutrient reservoir activity	7	1247	77	24460	0.11	0.24	// LOC_Os08g08970 // LOC_Os08g09080 // LOC_Os04g52260 // LOC_Os08g09010 // LOC_Os03g21790 // LOC_Os04g37770 // LOC_Os09g39530
GO:0042578	F	phosphoric ester hydrolase activity	17	1247	245	24460	0.14	0.28	// LOC_Os01g19130 // LOC_Os02g55560 // LOC_Os08g32960 // LOC_Os01g56880 // LOC_Os12g44050 // LOC_Os02g08364 // LOC_Os07g41150 // LOC_Os12g38770 // LOC_Os12g38760 // LOC_Os03g10950 // LOC_Os06g40170 // LOC_Os02g07730 // LOC_Os06g10650 // LOC_Os05g09724 // LOC_Os01g51890 // LOC_Os02g37590 // LOC_Os12g44020
GO:0022804	F	active transmembrane transporter activity	23	1247	349	24460	0.14	0.29	// LOC_Os04g35540 // LOC_Os01g11160 // LOC_Os11g05700 // LOC_Os05g01030 // LOC_Os08g37432 // LOC_Os12g44300 // LOC_Os01g42234 // LOC_Os12g42200 // LOC_Os10g20470 // LOC_Os05g41580 // LOC_Os06g48060 // LOC_Os03g43970 // LOC_Os11g05690 // LOC_Os02g55890 // LOC_Os10g30770 // LOC_Os10g30790 // LOC_Os05g48040 // LOC_Os01g31980 // LOC_Os03g20949 // LOC_Os09g37610 // LOC_Os12g42850 // LOC_Os08g45030 // …
GO:0016407	F	acetyltransferase activity	5	1247	54	24460	0.16	0.32	// LOC_Os01g52260 // LOC_Os06g44100 // LOC_Os03g07990 // LOC_Os07g39690 // LOC_Os04g40630
GO:0022891	F	substrate-specific transmembrane transporter activity	35	1247	573	24460	0.17	0.33	// LOC_Os04g32920 // LOC_Os04g35540 // LOC_Os07g39350 // LOC_Os01g11160 // LOC_Os01g56420 // LOC_Os05g01030 // LOC_Os12g44300 // LOC_Os06g48810 // LOC_Os07g48130 // LOC_Os01g42234 // LOC_Os12g42200 // LOC_Os01g61510 // LOC_Os11g05690 // LOC_Os10g30770 // LOC_Os05g41580 // LOC_Os06g48060 // LOC_Os03g43970 // LOC_Os07g37100 // LOC_Os02g36440 // LOC_Os07g37320 // LOC_Os05g39240 // LOC_Os07g47350 // …
GO:0016791	F	phosphatase activity	14	1247	202	24460	0.17	0.33	// LOC_Os01g19130 // LOC_Os02g55560 // LOC_Os08g32960 // LOC_Os01g56880 // LOC_Os12g44050 // LOC_Os02g08364 // LOC_Os12g38770 // LOC_Os12g38760 // LOC_Os03g10950 // LOC_Os02g07730 // LOC_Os06g10650 // LOC_Os05g09724 // LOC_Os01g51890 // LOC_Os12g44020
GO:0008289	F	lipid binding	7	1247	88	24460	0.18	0.34	// LOC_Os02g55970 // LOC_Os06g11800 // LOC_Os08g01710 // LOC_Os12g02290 // LOC_Os07g39680 // LOC_Os11g02389 // LOC_Os03g07100
GO:0046873	F	metal ion transmembrane transporter activity	8	1247	104	24460	0.18	0.34	// LOC_Os04g32920 // LOC_Os07g47350 // LOC_Os05g41580 // LOC_Os01g56420 // LOC_Os06g48810 // LOC_Os07g48130 // LOC_Os05g25194 // LOC_Os04g52120
GO:0043169	F	cation binding	312	1247	5841	24460	0.19	0.35	// LOC_Os04g39350 // LOC_Os06g32990 // LOC_Os11g05380 // LOC_Os07g44140 // LOC_Os01g67810 // LOC_Os06g33080 // LOC_Os01g65690 // LOC_Os03g49260 // LOC_Os02g15560 // LOC_Os01g06590 // LOC_Os08g36910 // LOC_Os02g07680 // LOC_Os11g47590 // LOC_Os01g43844 // LOC_Os07g45000 // LOC_Os11g47610 // LOC_Os06g48010 // LOC_Os03g57450 // LOC_Os04g09900 // LOC_Os06g11800 // LOC_Os07g48330 // LOC_Os01g65460 // …
GO:0043167	F	ion binding	312	1247	5845	24460	0.19	0.35	// LOC_Os04g39350 // LOC_Os06g32990 // LOC_Os11g05380 // LOC_Os07g44140 // LOC_Os01g67810 // LOC_Os06g33080 // LOC_Os01g65690 // LOC_Os03g49260 // LOC_Os02g15560 // LOC_Os01g06590 // LOC_Os08g36910 // LOC_Os02g07680 // LOC_Os11g47590 // LOC_Os01g43844 // LOC_Os07g45000 // LOC_Os11g47610 // LOC_Os06g48010 // LOC_Os03g57450 // LOC_Os04g09900 // LOC_Os06g11800 // LOC_Os07g48330 // LOC_Os01g65460 // …
GO:0016879	F	ligase activity, forming carbon-nitrogen bonds	15	1247	225	24460	0.19	0.35	// LOC_Os02g57700 // LOC_Os12g09540 // LOC_Os03g13740 // LOC_Os02g46500 // LOC_Os02g50460 // LOC_Os02g41670 // LOC_Os11g33090 // LOC_Os04g58800 // LOC_Os04g34030 // LOC_Os04g58920 // LOC_Os10g03440 // LOC_Os02g41650 // LOC_Os02g33590 // LOC_Os02g50240 // LOC_Os02g34410
GO:0019787	F	small conjugating protein ligase activity	10	1247	140	24460	0.19	0.35	// LOC_Os02g57700 // LOC_Os03g13740 // LOC_Os02g46500 // LOC_Os02g50460 // LOC_Os04g58800 // LOC_Os04g34030 // LOC_Os04g58920 // LOC_Os10g03440 // LOC_Os02g33590 // LOC_Os02g34410
GO:0016747	F	transferase activity, transferring acyl groups other than amino-acyl groups	20	1247	315	24460	0.2	0.36	// LOC_Os10g01650 // LOC_Os03g06705 // LOC_Os04g56910 // LOC_Os03g06700 // LOC_Os04g23940 // LOC_Os02g56860 // LOC_Os10g01720 // LOC_Os01g28474 // LOC_Os04g40630 // LOC_Os11g07960 // LOC_Os02g28220 // LOC_Os01g52260 // LOC_Os06g44100 // LOC_Os02g28170 // LOC_Os10g03390 // LOC_Os04g02640 // LOC_Os02g11070 // LOC_Os07g39690 // LOC_Os03g07990 // LOC_Os09g34930
GO:0030234	F	enzyme regulator activity	17	1247	263	24460	0.2	0.36	// LOC_Os01g68670 // LOC_Os01g03340 // LOC_Os01g03330 // LOC_Os01g03390 // LOC_Os01g03360 // LOC_Os01g20980 // LOC_Os12g25090 // LOC_Os04g57440 // LOC_Os01g42860 // LOC_Os02g32690 // LOC_Os12g18560 // LOC_Os02g18650 // LOC_Os04g28250 // LOC_Os11g12410 // LOC_Os01g58890 // LOC_Os08g34910 // LOC_Os08g34900
GO:0016746	F	transferase activity, transferring acyl groups	21	1247	336	24460	0.21	0.37	// LOC_Os10g01650 // LOC_Os03g06705 // LOC_Os04g56910 // LOC_Os03g06700 // LOC_Os04g40990 // LOC_Os02g56860 // LOC_Os10g01720 // LOC_Os01g28474 // LOC_Os04g40630 // LOC_Os11g07960 // LOC_Os02g28220 // LOC_Os01g52260 // LOC_Os06g44100 // LOC_Os02g28170 // LOC_Os10g03390 // LOC_Os04g02640 // LOC_Os02g11070 // LOC_Os07g39690 // LOC_Os03g07990 // LOC_Os04g23940 // LOC_Os09g34930
GO:0015291	F	secondary active transmembrane transporter activity	10	1247	147	24460	0.23	0.41	// LOC_Os10g20470 // LOC_Os10g30770 // LOC_Os10g30790 // LOC_Os06g48060 // LOC_Os05g48040 // LOC_Os01g31980 // LOC_Os08g37432 // LOC_Os09g37610 // LOC_Os12g44300 // LOC_Os12g42200
GO:0015297	F	antiporter activity	7	1247	98	24460	0.25	0.43	// LOC_Os10g20470 // LOC_Os05g48040 // LOC_Os01g31980 // LOC_Os08g37432 // LOC_Os09g37610 // LOC_Os12g44300 // LOC_Os12g42200
GO:0022892	F	substrate-specific transporter activity	37	1247	645	24460	0.26	0.43	// LOC_Os04g32920 // LOC_Os04g35540 // LOC_Os07g39350 // LOC_Os01g11160 // LOC_Os01g56420 // LOC_Os05g01030 // LOC_Os12g44300 // LOC_Os06g48810 // LOC_Os07g48130 // LOC_Os01g42234 // LOC_Os12g42200 // LOC_Os01g61510 // LOC_Os11g05690 // LOC_Os10g30770 // LOC_Os05g41580 // LOC_Os06g48060 // LOC_Os03g43970 // LOC_Os07g37100 // LOC_Os03g59660 // LOC_Os02g36440 // LOC_Os07g37320 // LOC_Os05g39240 // …
GO:0060089	F	molecular transducer activity	13	1247	205	24460	0.26	0.43	// LOC_Os03g10800 // LOC_Os03g17700 // LOC_Os06g06130 // LOC_Os06g44410 // LOC_Os11g01140 // LOC_Os01g09120 // LOC_Os09g25330 // LOC_Os11g02610 // LOC_Os05g09410 // LOC_Os12g02530 // LOC_Os04g57720 // LOC_Os06g43910 // LOC_Os12g01140
GO:0015238	F	drug transmembrane transporter activity	5	1247	66	24460	0.26	0.43	// LOC_Os01g31980 // LOC_Os10g20470 // LOC_Os09g37610 // LOC_Os05g48040 // LOC_Os08g37432
GO:0016614	F	oxidoreductase activity, acting on CH-OH group of donors	8	1247	116	24460	0.25	0.43	// LOC_Os10g33540 // LOC_Os02g38840 // LOC_Os06g01590 // LOC_Os04g55720 // LOC_Os08g40180 // LOC_Os05g09440 // LOC_Os09g31970 // LOC_Os10g35840
GO:0004871	F	signal transducer activity	13	1247	205	24460	0.26	0.43	// LOC_Os03g10800 // LOC_Os03g17700 // LOC_Os06g06130 // LOC_Os06g44410 // LOC_Os11g01140 // LOC_Os01g09120 // LOC_Os09g25330 // LOC_Os11g02610 // LOC_Os05g09410 // LOC_Os12g02530 // LOC_Os04g57720 // LOC_Os06g43910 // LOC_Os12g01140
GO:0016616	F	oxidoreductase activity, acting on the CH-OH group of donors, NAD or NADP as acceptor	7	1247	103	24460	0.29	0.46	// LOC_Os02g38840 // LOC_Os06g01590 // LOC_Os04g55720 // LOC_Os08g40180 // LOC_Os05g09440 // LOC_Os09g31970 // LOC_Os10g35840
GO:0016874	F	ligase activity	20	1247	342	24460	0.31	0.49	// LOC_Os02g33590 // LOC_Os02g57700 // LOC_Os12g09540 // LOC_Os03g13740 // LOC_Os02g46500 // LOC_Os02g50460 // LOC_Os09g27510 // LOC_Os02g41670 // LOC_Os06g06130 // LOC_Os11g33090 // LOC_Os04g58800 // LOC_Os04g34030 // LOC_Os03g53800 // LOC_Os04g58920 // LOC_Os10g03440 // LOC_Os04g33190 // LOC_Os02g41650 // LOC_Os05g12770 // LOC_Os02g50240 // LOC_Os02g34410
GO:0016881	F	acid-amino acid ligase activity	10	1247	162	24460	0.32	0.52	// LOC_Os02g57700 // LOC_Os03g13740 // LOC_Os02g46500 // LOC_Os02g50460 // LOC_Os04g58800 // LOC_Os04g34030 // LOC_Os04g58920 // LOC_Os10g03440 // LOC_Os02g33590 // LOC_Os02g34410
GO:0005515	F	protein binding	150	1247	2836	24460	0.33	0.53	// LOC_Os05g40770 // LOC_Os01g72020 // LOC_Os02g31140 // LOC_Os01g06590 // LOC_Os03g09070 // LOC_Os11g37870 // LOC_Os08g35160 // LOC_Os02g05980 // LOC_Os11g35450 // LOC_Os12g04410 // LOC_Os12g10740 // LOC_Os11g36150 // LOC_Os03g59660 // LOC_Os11g05190 // LOC_Os01g33810 // LOC_Os02g49710 // LOC_Os02g01800 // LOC_Os06g47620 // LOC_Os08g10290 // LOC_Os02g27690 // LOC_Os05g48590 // LOC_Os07g33740 // …
GO:0005215	F	transporter activity	60	1247	1110	24460	0.35	0.54	// LOC_Os01g67810 // LOC_Os04g32920 // LOC_Os04g35540 // LOC_Os07g39350 // LOC_Os02g47090 // LOC_Os06g48060 // LOC_Os01g11160 // LOC_Os01g08190 // LOC_Os01g56420 // LOC_Os02g34580 // LOC_Os11g05700 // LOC_Os05g01030 // LOC_Os08g37432 // LOC_Os12g44300 // LOC_Os06g48810 // LOC_Os07g48130 // LOC_Os11g24060 // LOC_Os01g42234 // LOC_Os12g42200 // LOC_Os01g61510 // LOC_Os10g20470 // LOC_Os11g05690 // …
GO:0022890	F	inorganic cation transmembrane transporter activity	13	1247	229	24460	0.39	0.61	// LOC_Os04g32920 // LOC_Os05g39240 // LOC_Os07g47350 // LOC_Os05g41580 // LOC_Os02g34580 // LOC_Os01g56420 // LOC_Os03g02340 // LOC_Os12g44300 // LOC_Os01g61510 // LOC_Os06g48810 // LOC_Os07g48130 // LOC_Os04g52120 // LOC_Os02g40710
GO:0008415	F	acyltransferase activity	9	1247	169	24460	0.5	0.76	// LOC_Os03g06705 // LOC_Os04g23940 // LOC_Os04g40630 // LOC_Os01g52260 // LOC_Os06g44100 // LOC_Os04g02640 // LOC_Os02g11070 // LOC_Os07g39690 // LOC_Os03g07990
GO:0004721	F	phosphoprotein phosphatase activity	5	1247	97	24460	0.55	0.84	// LOC_Os01g19130 // LOC_Os06g10650 // LOC_Os02g55560 // LOC_Os03g10950 // LOC_Os02g08364
GO:0008238	F	exopeptidase activity	5	1247	105	24460	0.62	0.94	// LOC_Os03g52040 // LOC_Os11g24290 // LOC_Os08g44640 // LOC_Os11g24510 // LOC_Os05g43830
GO:0004252	F	serine-type endopeptidase activity	6	1247	289	24460	1	1	// LOC_Os02g17150 // LOC_Os01g58290 // LOC_Os06g43780 // LOC_Os06g10650 // LOC_Os06g48650 // LOC_Os11g31680
GO:0017171	F	serine hydrolase activity	11	1247	380	24460	0.98	1	// LOC_Os03g52040 // LOC_Os02g17150 // LOC_Os11g31680 // LOC_Os01g58290 // LOC_Os09g25640 // LOC_Os06g43780 // LOC_Os11g24290 // LOC_Os06g10650 // LOC_Os06g48650 // LOC_Os08g44640 // LOC_Os11g24510
GO:0016818	F	hydrolase activity, acting on acid anhydrides, in phosphorus-containing anhydrides	26	1247	760	24460	0.99	1	// LOC_Os08g30780 // LOC_Os01g55510 // LOC_Os01g42410 // LOC_Os11g05700 // LOC_Os05g01030 // LOC_Os01g42234 // LOC_Os05g41580 // LOC_Os01g42380 // LOC_Os01g12660 // LOC_Os06g48060 // LOC_Os02g55890 // LOC_Os10g31864 // LOC_Os01g40170 // LOC_Os09g26260 // LOC_Os01g47730 // LOC_Os05g51130 // LOC_Os03g20949 // LOC_Os12g44190 // LOC_Os07g09420 // LOC_Os02g11760 // LOC_Os08g30770 // LOC_Os08g45030 // …
GO:0016817	F	hydrolase activity, acting on acid anhydrides	27	1247	787	24460	0.99	1	// LOC_Os08g30780 // LOC_Os01g55510 // LOC_Os01g42410 // LOC_Os11g05700 // LOC_Os05g01030 // LOC_Os01g08190 // LOC_Os01g42234 // LOC_Os05g41580 // LOC_Os01g42380 // LOC_Os01g12660 // LOC_Os06g48060 // LOC_Os02g55890 // LOC_Os10g31864 // LOC_Os01g40170 // LOC_Os09g26260 // LOC_Os01g47730 // LOC_Os05g51130 // LOC_Os03g20949 // LOC_Os12g44190 // LOC_Os07g09420 // LOC_Os02g11760 // LOC_Os08g30770 // …
GO:0031072	F	heat shock protein binding	6	1247	138	24460	0.7	1	// LOC_Os08g35160 // LOC_Os01g65480 // LOC_Os03g44620 // LOC_Os06g09560 // LOC_Os08g43490 // LOC_Os04g46390
GO:0015399	F	primary active transmembrane transporter activity	7	1247	175	24460	0.78	1	// LOC_Os05g41580 // LOC_Os11g05700 // LOC_Os05g01030 // LOC_Os03g20949 // LOC_Os08g45030 // LOC_Os02g55890 // LOC_Os01g50160
GO:0016787	F	hydrolase activity	190	1247	6088	24460	1	1	// LOC_Os01g67810 // LOC_Os02g33110 // LOC_Os02g08364 // LOC_Os06g48060 // LOC_Os09g25640 // LOC_Os01g61570 // LOC_Os01g11650 // LOC_Os11g19340 // LOC_Os01g42690 // LOC_Os09g39760 // LOC_Os01g31420 // LOC_Os11g13670 // LOC_Os08g30780 // LOC_Os04g09390 // LOC_Os07g43670 // LOC_Os01g22590 // LOC_Os01g65460 // LOC_Os04g42860 // LOC_Os07g41150 // LOC_Os09g18530 // LOC_Os01g51570 // LOC_Os03g10950 // …
GO:0016788	F	hydrolase activity, acting on ester bonds	52	1247	1871	24460	1	1	// LOC_Os01g19130 // LOC_Os01g37050 // LOC_Os02g08364 // LOC_Os04g11240 // LOC_Os03g19610 // LOC_Os01g61570 // LOC_Os01g11730 // LOC_Os01g11650 // LOC_Os11g19340 // LOC_Os04g57440 // LOC_Os12g18560 // LOC_Os09g39760 // LOC_Os01g31420 // LOC_Os02g07730 // LOC_Os01g51890 // LOC_Os06g06290 // LOC_Os11g38050 // LOC_Os05g06710 // LOC_Os06g25760 // LOC_Os01g56880 // LOC_Os01g20980 // LOC_Os04g42860 // …
GO:0016779	F	nucleotidyltransferase activity	15	1247	2865	24460	1	1	// LOC_Os12g16150 // LOC_Os12g20190 // LOC_Os11g14090 // LOC_Os06g25760 // LOC_Os04g11240 // LOC_Os01g33810 // LOC_Os07g02650 // LOC_Os12g19180 // LOC_Os02g51660 // LOC_Os06g23170 // LOC_Os01g31420 // LOC_Os01g08250 // LOC_Os02g02100 // LOC_Os03g16150 // LOC_Os02g18520
GO:0016772	F	transferase activity, transferring phosphorus-containing groups	182	1247	4672	24460	1	1	// LOC_Os05g40770 // LOC_Os03g17700 // LOC_Os04g52840 // LOC_Os12g14699 // LOC_Os11g03840 // LOC_Os01g31420 // LOC_Os08g40280 // LOC_Os02g48210 // LOC_Os02g05980 // LOC_Os03g12470 // LOC_Os09g18530 // LOC_Os11g01140 // LOC_Os01g49529 // LOC_Os12g10740 // LOC_Os11g36150 // LOC_Os02g02600 // LOC_Os07g35004 // LOC_Os11g36090 // LOC_Os08g40270 // LOC_Os02g01800 // LOC_Os08g03020 // LOC_Os01g04580 // …
GO:0015075	F	ion transmembrane transporter activity	21	1247	449	24460	0.68	1	// LOC_Os02g34580 // LOC_Os04g32920 // LOC_Os05g39240 // LOC_Os10g30790 // LOC_Os10g30770 // LOC_Os07g47350 // LOC_Os05g41580 // LOC_Os01g56420 // LOC_Os06g48060 // LOC_Os06g06130 // LOC_Os03g02340 // LOC_Os05g01030 // LOC_Os03g20949 // LOC_Os12g44300 // LOC_Os01g61510 // LOC_Os06g48810 // LOC_Os07g48130 // LOC_Os05g25194 // LOC_Os04g52120 // LOC_Os12g42200 // LOC_Os02g40710
GO:0015077	F	monovalent inorganic cation transmembrane transporter activity	7	1247	180	24460	0.81	1	// LOC_Os03g02340 // LOC_Os07g47350 // LOC_Os04g32920 // LOC_Os12g44300 // LOC_Os06g48810 // LOC_Os07g48130 // LOC_Os04g52120
GO:0008324	F	cation transmembrane transporter activity	15	1247	342	24460	0.75	1	// LOC_Os04g32920 // LOC_Os05g39240 // LOC_Os07g47350 // LOC_Os05g41580 // LOC_Os02g34580 // LOC_Os01g56420 // LOC_Os03g02340 // LOC_Os12g44300 // LOC_Os01g61510 // LOC_Os06g48810 // LOC_Os07g48130 // LOC_Os05g25194 // LOC_Os04g52120 // LOC_Os12g42200 // LOC_Os02g40710
GO:0004190	F	aspartic-type endopeptidase activity	26	1247	2120	24460	1	1	// LOC_Os01g71090 // LOC_Os04g11240 // LOC_Os01g42320 // LOC_Os01g48750 // LOC_Os09g29710 // LOC_Os05g33400 // LOC_Os06g25760 // LOC_Os02g21040 // LOC_Os10g14990 // LOC_Os06g35550 // LOC_Os12g16150 // LOC_Os11g14090 // LOC_Os01g71130 // LOC_Os09g25910 // LOC_Os11g32180 // LOC_Os01g48740 // LOC_Os02g48870 // LOC_Os05g33410 // LOC_Os12g20190 // LOC_Os05g33430 // LOC_Os02g27360 // LOC_Os11g08100 // …
GO:0003735	F	structural constituent of ribosome	5	1247	455	24460	1	1	// LOC_Os04g57440 // LOC_Os09g31019 // LOC_Os12g42850 // LOC_Os09g31031 // LOC_Os11g04070
GO:0070011	F	peptidase activity, acting on L-amino acid peptides	52	1247	3136	24460	1	1	// LOC_Os01g67810 // LOC_Os01g71090 // LOC_Os04g11240 // LOC_Os09g25640 // LOC_Os01g48750 // LOC_Os04g57440 // LOC_Os09g29710 // LOC_Os01g24570 // LOC_Os11g46910 // LOC_Os05g33400 // LOC_Os01g24550 // LOC_Os02g17150 // LOC_Os06g48650 // LOC_Os06g25760 // LOC_Os02g21040 // LOC_Os05g33410 // LOC_Os01g37960 // LOC_Os01g42320 // LOC_Os06g47620 // LOC_Os06g35550 // LOC_Os01g24600 // LOC_Os08g44640 // …
GO:0016740	F	transferase activity	274	1247	6033	24460	0.99	1	// LOC_Os04g35270 // LOC_Os03g19310 // LOC_Os12g20190 // LOC_Os09g27950 // LOC_Os03g17700 // LOC_Os06g27560 // LOC_Os04g52840 // LOC_Os12g14699 // LOC_Os05g40770 // LOC_Os01g72610 // LOC_Os02g11070 // LOC_Os10g39840 // LOC_Os08g40280 // LOC_Os02g07044 // LOC_Os02g48210 // LOC_Os02g05980 // LOC_Os04g51460 // LOC_Os06g09450 // LOC_Os03g12470 // LOC_Os10g03390 // LOC_Os11g01140 // LOC_Os01g49529 // …
GO:0016741	F	transferase activity, transferring one-carbon groups	9	1247	262	24460	0.91	1	// LOC_Os11g15040 // LOC_Os01g50610 // LOC_Os04g09670 // LOC_Os11g15060 // LOC_Os11g15340 // LOC_Os06g05910 // LOC_Os01g02920 // LOC_Os03g59290 // LOC_Os11g15300
GO:0016893	F	endonuclease activity, active with either ribo- or deoxyribonucleic acids and producing 5'-phosphomonoesters	6	1247	1128	24460	1	1	// LOC_Os12g20190 // LOC_Os11g14090 // LOC_Os06g25760 // LOC_Os04g11240 // LOC_Os01g31420 // LOC_Os01g37050
GO:0016891	F	endoribonuclease activity, producing 5'-phosphomonoesters	6	1247	1122	24460	1	1	// LOC_Os12g20190 // LOC_Os11g14090 // LOC_Os06g25760 // LOC_Os04g11240 // LOC_Os01g31420 // LOC_Os01g37050
GO:0034061	F	DNA polymerase activity	13	1247	2737	24460	1	1	// LOC_Os12g16150 // LOC_Os12g20190 // LOC_Os11g14090 // LOC_Os06g25760 // LOC_Os04g11240 // LOC_Os07g02650 // LOC_Os12g19180 // LOC_Os02g51660 // LOC_Os06g23170 // LOC_Os01g31420 // LOC_Os01g08250 // LOC_Os02g02100 // LOC_Os02g18520
GO:0019001	F	guanyl nucleotide binding	6	1247	215	24460	0.96	1	// LOC_Os10g31630 // LOC_Os01g47730 // LOC_Os02g47110 // LOC_Os01g25450 // LOC_Os05g43820 // LOC_Os01g40170
GO:0046983	F	protein dimerization activity	19	1247	424	24460	0.74	1	// LOC_Os01g53880 // LOC_Os01g59350 // LOC_Os12g40900 // LOC_Os05g44810 // LOC_Os02g15380 // LOC_Os01g37960 // LOC_Os11g05480 // LOC_Os11g05640 // LOC_Os03g43410 // LOC_Os02g56120 // LOC_Os06g07040 // LOC_Os05g48590 // LOC_Os03g43400 // LOC_Os06g47620 // LOC_Os05g49420 // LOC_Os01g64730 // LOC_Os11g14470 // LOC_Os10g02910 // LOC_Os03g21800
GO:0004521	F	endoribonuclease activity	7	1247	1133	24460	1	1	// LOC_Os07g43670 // LOC_Os01g37050 // LOC_Os06g25760 // LOC_Os12g20190 // LOC_Os04g11240 // LOC_Os01g31420 // LOC_Os11g14090
GO:0004523	F	ribonuclease H activity	5	1247	1107	24460	1	1	// LOC_Os04g11240 // LOC_Os12g20190 // LOC_Os11g14090 // LOC_Os06g25760 // LOC_Os01g31420
GO:0032561	F	guanyl ribonucleotide binding	6	1247	211	24460	0.95	1	// LOC_Os10g31630 // LOC_Os01g47730 // LOC_Os02g47110 // LOC_Os01g25450 // LOC_Os05g43820 // LOC_Os01g40170
GO:0005488	F	binding	844	1247	16899	24460	0.86	1	// LOC_Os11g41170 // LOC_Os05g48590 // LOC_Os11g47610 // LOC_Os04g09390 // LOC_Os11g37870 // LOC_Os08g43500 // LOC_Os02g48210 // LOC_Os02g05980 // LOC_Os12g04410 // LOC_Os03g12470 // LOC_Os11g01140 // LOC_Os06g07040 // LOC_Os11g36150 // LOC_Os07g35004 // LOC_Os09g37690 // LOC_Os11g10480 // LOC_Os11g36090 // LOC_Os12g38300 // LOC_Os01g64790 // LOC_Os09g32670 // LOC_Os06g36000 // LOC_Os11g29710 // …
GO:0004175	F	endopeptidase activity	40	1247	2567	24460	1	1	// LOC_Os01g71090 // LOC_Os04g11240 // LOC_Os01g42320 // LOC_Os01g48750 // LOC_Os04g57440 // LOC_Os09g29710 // LOC_Os01g24570 // LOC_Os05g33400 // LOC_Os01g24550 // LOC_Os02g17150 // LOC_Os06g48650 // LOC_Os06g25760 // LOC_Os02g21040 // LOC_Os05g33410 // LOC_Os06g35550 // LOC_Os01g24600 // LOC_Os12g16150 // LOC_Os11g14090 // LOC_Os01g71130 // LOC_Os09g25910 // LOC_Os11g32180 // LOC_Os09g39070 // …
GO:0003676	F	nucleic acid binding	189	1247	8081	24460	1	1	// LOC_Os07g48450 // LOC_Os05g04210 // LOC_Os01g64790 // LOC_Os02g15560 // LOC_Os05g49420 // LOC_Os01g31420 // LOC_Os07g43670 // LOC_Os06g17480 // LOC_Os01g68370 // LOC_Os05g37080 // LOC_Os03g51690 // LOC_Os07g48260 // LOC_Os03g08460 // LOC_Os12g29330 // LOC_Os01g40260 // LOC_Os02g18530 // LOC_Os01g33810 // LOC_Os03g20910 // LOC_Os06g36000 // LOC_Os11g32180 // LOC_Os06g46270 // LOC_Os05g10620 // …
GO:0017111	F	nucleoside-triphosphatase activity	25	1247	714	24460	0.98	1	// LOC_Os08g30780 // LOC_Os01g55510 // LOC_Os01g42410 // LOC_Os11g05700 // LOC_Os05g01030 // LOC_Os01g42234 // LOC_Os05g41580 // LOC_Os01g42380 // LOC_Os01g12660 // LOC_Os06g48060 // LOC_Os10g31864 // LOC_Os01g40170 // LOC_Os09g26260 // LOC_Os01g47730 // LOC_Os05g51130 // LOC_Os03g20949 // LOC_Os12g44190 // LOC_Os07g09420 // LOC_Os02g11760 // LOC_Os08g30770 // LOC_Os08g45030 // LOC_Os02g32690 // …
GO:0070001	F	aspartic-type peptidase activity	26	1247	2120	24460	1	1	// LOC_Os01g71090 // LOC_Os04g11240 // LOC_Os01g42320 // LOC_Os01g48750 // LOC_Os09g29710 // LOC_Os05g33400 // LOC_Os06g25760 // LOC_Os02g21040 // LOC_Os10g14990 // LOC_Os06g35550 // LOC_Os12g16150 // LOC_Os11g14090 // LOC_Os01g71130 // LOC_Os09g25910 // LOC_Os11g32180 // LOC_Os01g48740 // LOC_Os02g48870 // LOC_Os05g33410 // LOC_Os12g20190 // LOC_Os05g33430 // LOC_Os02g27360 // LOC_Os11g08100 // …
GO:0046872	F	metal ion binding	281	1247	5637	24460	0.67	1	// LOC_Os04g39350 // LOC_Os06g32990 // LOC_Os11g05380 // LOC_Os07g44140 // LOC_Os01g67810 // LOC_Os06g33080 // LOC_Os01g65690 // LOC_Os03g49260 // LOC_Os02g15560 // LOC_Os01g06590 // LOC_Os08g36910 // LOC_Os02g07680 // LOC_Os01g43844 // LOC_Os07g45000 // LOC_Os02g15020 // LOC_Os02g30090 // LOC_Os03g57450 // LOC_Os04g09900 // LOC_Os06g11800 // LOC_Os07g48330 // LOC_Os11g41680 // LOC_Os02g26810 // …
GO:0015405	F	P-P-bond-hydrolysis-driven transmembrane transporter activity	7	1247	175	24460	0.78	1	// LOC_Os05g41580 // LOC_Os11g05700 // LOC_Os05g01030 // LOC_Os03g20949 // LOC_Os08g45030 // LOC_Os02g55890 // LOC_Os01g50160
GO:0016887	F	ATPase activity	15	1247	371	24460	0.84	1	// LOC_Os08g30780 // LOC_Os05g41580 // LOC_Os02g11760 // LOC_Os01g42234 // LOC_Os06g48060 // LOC_Os01g42410 // LOC_Os08g30770 // LOC_Os11g05700 // LOC_Os05g01030 // LOC_Os03g20949 // LOC_Os02g32690 // LOC_Os08g45030 // LOC_Os10g31864 // LOC_Os01g50160 // LOC_Os01g42380
GO:0003677	F	DNA binding	161	1247	5202	24460	1	1	// LOC_Os07g48450 // LOC_Os05g04210 // LOC_Os01g64790 // LOC_Os02g15560 // LOC_Os01g61080 // LOC_Os06g17480 // LOC_Os01g68370 // LOC_Os05g37080 // LOC_Os03g51690 // LOC_Os07g48260 // LOC_Os03g08460 // LOC_Os12g29330 // LOC_Os01g40260 // LOC_Os01g33810 // LOC_Os04g46250 // LOC_Os06g36000 // LOC_Os11g32180 // LOC_Os06g46270 // LOC_Os05g10620 // LOC_Os01g04800 // LOC_Os01g19694 // LOC_Os02g02100 // …
GO:0008168	F	methyltransferase activity	9	1247	257	24460	0.9	1	// LOC_Os11g15040 // LOC_Os01g50610 // LOC_Os04g09670 // LOC_Os11g15060 // LOC_Os11g15340 // LOC_Os06g05910 // LOC_Os01g02920 // LOC_Os03g59290 // LOC_Os11g15300
GO:0042626	F	ATPase activity, coupled to transmembrane movement of substances	6	1247	147	24460	0.76	1	// LOC_Os05g41580 // LOC_Os08g45030 // LOC_Os05g01030 // LOC_Os03g20949 // LOC_Os11g05700 // LOC_Os01g50160
GO:0042623	F	ATPase activity, coupled	6	1247	274	24460	0.99	1	// LOC_Os05g41580 // LOC_Os08g45030 // LOC_Os05g01030 // LOC_Os03g20949 // LOC_Os11g05700 // LOC_Os01g50160
GO:0005525	F	GTP binding	6	1247	211	24460	0.95	1	// LOC_Os10g31630 // LOC_Os01g47730 // LOC_Os02g47110 // LOC_Os01g25450 // LOC_Os05g43820 // LOC_Os01g40170
GO:0008233	F	peptidase activity	53	1247	3151	24460	1	1	// LOC_Os01g67810 // LOC_Os01g71090 // LOC_Os04g11240 // LOC_Os09g25640 // LOC_Os01g48750 // LOC_Os04g57440 // LOC_Os09g29710 // LOC_Os01g24570 // LOC_Os11g46910 // LOC_Os05g33400 // LOC_Os01g24550 // LOC_Os02g17150 // LOC_Os06g48650 // LOC_Os06g25760 // LOC_Os02g21040 // LOC_Os05g33410 // LOC_Os01g37960 // LOC_Os01g42320 // LOC_Os06g47620 // LOC_Os06g35550 // LOC_Os01g24600 // LOC_Os08g44640 // …
GO:0008234	F	cysteine-type peptidase activity	11	1247	473	24460	1	1	// LOC_Os09g39070 // LOC_Os01g71130 // LOC_Os05g17050 // LOC_Os04g57440 // LOC_Os09g12480 // LOC_Os09g39120 // LOC_Os01g24570 // LOC_Os01g24560 // LOC_Os01g24600 // LOC_Os11g46910 // LOC_Os01g24550
GO:0008236	F	serine-type peptidase activity	11	1247	380	24460	0.98	1	// LOC_Os03g52040 // LOC_Os02g17150 // LOC_Os11g31680 // LOC_Os01g58290 // LOC_Os09g25640 // LOC_Os06g43780 // LOC_Os11g24290 // LOC_Os06g10650 // LOC_Os06g48650 // LOC_Os08g44640 // LOC_Os11g24510
GO:0051082	F	unfolded protein binding	5	1247	119	24460	0.72	1	// LOC_Os01g65480 // LOC_Os01g67054 // LOC_Os04g46390 // LOC_Os03g44620 // LOC_Os08g43490
GO:0004518	F	nuclease activity	9	1247	1252	24460	1	1	// LOC_Os07g43670 // LOC_Os01g37050 // LOC_Os06g25760 // LOC_Os11g32290 // LOC_Os12g20190 // LOC_Os04g11240 // LOC_Os07g02180 // LOC_Os01g31420 // LOC_Os11g14090
GO:0004519	F	endonuclease activity	7	1247	1168	24460	1	1	// LOC_Os07g43670 // LOC_Os01g37050 // LOC_Os06g25760 // LOC_Os12g20190 // LOC_Os04g11240 // LOC_Os01g31420 // LOC_Os11g14090
GO:0008270	F	zinc ion binding	76	1247	3877	24460	1	1	// LOC_Os04g52280 // LOC_Os01g67810 // LOC_Os01g08250 // LOC_Os12g24490 // LOC_Os04g58190 // LOC_Os06g42520 // LOC_Os02g27510 // LOC_Os08g38040 // LOC_Os06g41010 // LOC_Os04g40630 // LOC_Os05g29710 // LOC_Os01g06590 // LOC_Os02g45780 // LOC_Os01g65690 // LOC_Os08g44950 // LOC_Os01g74040 // LOC_Os04g01160 // LOC_Os12g02210 // LOC_Os03g22080 // LOC_Os09g36500 // LOC_Os08g03310 // LOC_Os06g40960 // …
GO:0004540	F	ribonuclease activity	7	1247	1152	24460	1	1	// LOC_Os07g43670 // LOC_Os01g37050 // LOC_Os06g25760 // LOC_Os12g20190 // LOC_Os04g11240 // LOC_Os01g31420 // LOC_Os11g14090
GO:0043492	F	ATPase activity, coupled to movement of substances	6	1247	147	24460	0.76	1	// LOC_Os05g41580 // LOC_Os08g45030 // LOC_Os05g01030 // LOC_Os03g20949 // LOC_Os11g05700 // LOC_Os01g50160
GO:0016462	F	pyrophosphatase activity	26	1247	747	24460	0.98	1	// LOC_Os08g30780 // LOC_Os01g55510 // LOC_Os01g42410 // LOC_Os11g05700 // LOC_Os05g01030 // LOC_Os01g42234 // LOC_Os05g41580 // LOC_Os01g42380 // LOC_Os01g12660 // LOC_Os06g48060 // LOC_Os02g55890 // LOC_Os10g31864 // LOC_Os01g40170 // LOC_Os09g26260 // LOC_Os01g47730 // LOC_Os05g51130 // LOC_Os03g20949 // LOC_Os12g44190 // LOC_Os07g09420 // LOC_Os02g11760 // LOC_Os08g30770 // LOC_Os08g45030 // …
GO:0016820	F	hydrolase activity, acting on acid anhydrides, catalyzing transmembrane movement of substances	7	1247	174	24460	0.78	1	// LOC_Os05g41580 // LOC_Os08g45030 // LOC_Os05g01030 // LOC_Os03g20949 // LOC_Os11g05700 // LOC_Os01g08190 // LOC_Os01g50160
GO:0003964	F	RNA-directed DNA polymerase activity	11	1247	2703	24460	1	1	// LOC_Os12g16150 // LOC_Os12g20190 // LOC_Os11g14090 // LOC_Os06g25760 // LOC_Os04g11240 // LOC_Os07g02650 // LOC_Os06g23170 // LOC_Os01g31420 // LOC_Os01g08250 // LOC_Os02g02100 // LOC_Os02g18520
GO:0003723	F	RNA binding	16	1247	3007	24460	1	1	// LOC_Os12g16150 // LOC_Os07g43670 // LOC_Os01g37050 // LOC_Os10g39770 // LOC_Os06g25760 // LOC_Os12g20190 // LOC_Os04g11240 // LOC_Os11g14090 // LOC_Os01g52250 // LOC_Os07g02650 // LOC_Os06g23170 // LOC_Os01g31420 // LOC_Os01g08250 // LOC_Os02g02100 // LOC_Os02g18520 // LOC_Os08g03310
GO:0005198	F	structural molecule activity	6	1247	531	24460	1	1	// LOC_Os12g42850 // LOC_Os09g31031 // LOC_Os11g04070 // LOC_Os04g57440 // LOC_Os09g31019 // LOC_Os01g62670
GO:0046914	F	transition metal ion binding	204	1247	4946	24460	1	1	// LOC_Os02g38930 // LOC_Os06g32990 // LOC_Os11g05380 // LOC_Os01g67810 // LOC_Os06g33080 // LOC_Os01g65690 // LOC_Os03g49260 // LOC_Os02g15560 // LOC_Os01g06590 // LOC_Os02g07680 // LOC_Os07g45000 // LOC_Os02g15020 // LOC_Os02g30090 // LOC_Os03g58890 // LOC_Os02g26810 // LOC_Os09g32570 // LOC_Os03g25300 // LOC_Os06g13180 // LOC_Os03g08999 // LOC_Os05g33600 // LOC_Os09g33550 // LOC_Os11g10480 // …
GO:0005576	C	extracellular region	30	1247	269	24460	0.00014	0.0043	// LOC_Os12g05260 // LOC_Os07g03279 // LOC_Os07g03467 // LOC_Os07g03600 // LOC_Os04g57440 // LOC_Os01g60770 // LOC_Os10g40700 // LOC_Os07g03409 // LOC_Os10g40720 // LOC_Os10g39640 // LOC_Os01g03340 // LOC_Os09g20090 // LOC_Os08g09080 // LOC_Os01g03360 // LOC_Os10g39840 // LOC_Os01g03390 // LOC_Os07g23944 // LOC_Os08g08970 // LOC_Os07g03319 // LOC_Os04g22210 // LOC_Os09g32952 // LOC_Os06g44470 // …
GO:0005618	C	cell wall	13	1247	82	24460	0.00067	0.01	// LOC_Os01g20980 // LOC_Os03g19610 // LOC_Os09g37360 // LOC_Os10g39840 // LOC_Os11g45730 // LOC_Os09g39760 // LOC_Os10g26680 // LOC_Os02g18650 // LOC_Os06g48650 // LOC_Os04g51460 // LOC_Os08g34910 // LOC_Os08g34900 // LOC_Os11g33270
GO:0030312	C	external encapsulating structure	13	1247	103	24460	0.0041	0.041	// LOC_Os01g20980 // LOC_Os03g19610 // LOC_Os09g37360 // LOC_Os10g39840 // LOC_Os11g45730 // LOC_Os09g39760 // LOC_Os10g26680 // LOC_Os02g18650 // LOC_Os06g48650 // LOC_Os04g51460 // LOC_Os08g34910 // LOC_Os08g34900 // LOC_Os11g33270
GO:0005829	C	cytosol	5	1247	33	24460	0.035	0.21	// LOC_Os05g44922 // LOC_Os06g13810 // LOC_Os08g25720 // LOC_Os10g08550 // LOC_Os05g10650
GO:0044445	C	cytosolic part	5	1247	33	24460	0.035	0.21	// LOC_Os05g44922 // LOC_Os06g13810 // LOC_Os08g25720 // LOC_Os10g08550 // LOC_Os05g10650
GO:0000151	C	ubiquitin ligase complex	9	1247	87	24460	0.043	0.22	// LOC_Os02g57700 // LOC_Os03g13740 // LOC_Os02g46500 // LOC_Os02g50460 // LOC_Os04g34030 // LOC_Os04g58920 // LOC_Os10g03440 // LOC_Os02g33590 // LOC_Os02g34410
GO:0031224	C	intrinsic to membrane	45	1247	748	24460	0.16	0.58	// LOC_Os04g35540 // LOC_Os07g39350 // LOC_Os09g25760 // LOC_Os01g56420 // LOC_Os11g05700 // LOC_Os05g01030 // LOC_Os12g44300 // LOC_Os12g35610 // LOC_Os06g48810 // LOC_Os01g65380 // LOC_Os01g42234 // LOC_Os12g42200 // LOC_Os07g26630 // LOC_Os03g12900 // LOC_Os05g11560 // LOC_Os03g02530 // LOC_Os08g40180 // LOC_Os09g37690 // LOC_Os02g36440 // LOC_Os07g37320 // LOC_Os06g12610 // LOC_Os10g36924 // …
GO:0016021	C	integral to membrane	44	1247	727	24460	0.15	0.58	// LOC_Os04g35540 // LOC_Os07g39350 // LOC_Os09g25760 // LOC_Os01g56420 // LOC_Os11g05700 // LOC_Os05g01030 // LOC_Os12g44300 // LOC_Os12g35610 // LOC_Os06g48810 // LOC_Os01g65380 // LOC_Os01g42234 // LOC_Os12g42200 // LOC_Os07g26630 // LOC_Os03g12900 // LOC_Os05g11560 // LOC_Os03g02530 // LOC_Os08g40180 // LOC_Os02g36440 // LOC_Os07g37320 // LOC_Os06g12610 // LOC_Os10g36924 // LOC_Os10g30770 // …
GO:0048046	C	apoplast	7	1247	94	24460	0.22	0.73	// LOC_Os08g08970 // LOC_Os08g09080 // LOC_Os10g39840 // LOC_Os08g09010 // LOC_Os09g39530 // LOC_Os04g51460 // LOC_Os11g33270
GO:0016020	C	membrane	119	1247	2185	24460	0.24	0.73	// LOC_Os01g67810 // LOC_Os04g35270 // LOC_Os02g47090 // LOC_Os06g48060 // LOC_Os09g25640 // LOC_Os09g31478 // LOC_Os11g05700 // LOC_Os01g65380 // LOC_Os12g33300 // LOC_Os03g43970 // LOC_Os06g44410 // LOC_Os09g30120 // LOC_Os03g59660 // LOC_Os09g37690 // LOC_Os05g33960 // LOC_Os06g12610 // LOC_Os07g05570 // LOC_Os07g47350 // LOC_Os01g56420 // LOC_Os06g06130 // LOC_Os05g48040 // LOC_Os10g37760 // …
GO:0044424	C	intracellular part	137	1247	3831	24460	1	1	// LOC_Os01g67810 // LOC_Os11g36400 // LOC_Os01g61080 // LOC_Os08g38210 // LOC_Os04g13530 // LOC_Os06g17480 // LOC_Os09g35910 // LOC_Os07g05010 // LOC_Os03g51690 // LOC_Os07g48260 // LOC_Os03g59660 // LOC_Os09g37690 // LOC_Os03g20910 // LOC_Os06g06130 // LOC_Os02g12380 // LOC_Os01g52260 // LOC_Os08g25720 // LOC_Os03g43400 // LOC_Os01g19694 // LOC_Os02g02100 // LOC_Os09g31019 // LOC_Os02g33590 // …
GO:0044425	C	membrane part	49	1247	1006	24460	0.65	1	// LOC_Os04g35540 // LOC_Os07g39350 // LOC_Os09g25760 // LOC_Os01g08190 // LOC_Os01g56420 // LOC_Os07g05360 // LOC_Os11g05700 // LOC_Os05g01030 // LOC_Os12g44300 // LOC_Os12g35610 // LOC_Os06g48810 // LOC_Os01g65380 // LOC_Os01g42234 // LOC_Os12g42200 // LOC_Os02g55970 // LOC_Os07g26630 // LOC_Os03g12900 // LOC_Os05g11560 // LOC_Os03g02530 // LOC_Os08g40180 // LOC_Os03g59660 // LOC_Os09g37690 // …
GO:0044464	C	cell part	293	1247	6353	24460	0.98	1	// LOC_Os01g67810 // LOC_Os04g35270 // LOC_Os02g08364 // LOC_Os02g47090 // LOC_Os06g48060 // LOC_Os09g25640 // LOC_Os09g31478 // LOC_Os11g05700 // LOC_Os05g49420 // LOC_Os10g32110 // LOC_Os09g39760 // LOC_Os10g36924 // LOC_Os01g65380 // LOC_Os12g33300 // LOC_Os08g38210 // LOC_Os05g50610 // LOC_Os09g16510 // LOC_Os09g31970 // LOC_Os06g17480 // LOC_Os09g31019 // LOC_Os08g42440 // LOC_Os11g36400 // …
GO:0043234	C	protein complex	33	1247	799	24460	0.9	1	// LOC_Os10g31630 // LOC_Os01g67810 // LOC_Os02g08364 // LOC_Os01g55510 // LOC_Os07g05360 // LOC_Os02g57700 // LOC_Os01g19130 // LOC_Os04g34030 // LOC_Os12g44300 // LOC_Os01g08190 // LOC_Os01g42234 // LOC_Os02g55970 // LOC_Os12g06840 // LOC_Os05g10650 // LOC_Os01g65460 // LOC_Os11g36400 // LOC_Os12g19180 // LOC_Os03g10950 // LOC_Os10g08550 // LOC_Os03g59660 // LOC_Os01g67820 // LOC_Os02g50460 // …
GO:0043231	C	intracellular membrane-bounded organelle	91	1247	2504	24460	1	1	// LOC_Os01g61080 // LOC_Os08g38210 // LOC_Os06g17480 // LOC_Os09g35910 // LOC_Os07g05010 // LOC_Os03g51690 // LOC_Os07g48260 // LOC_Os03g59660 // LOC_Os09g37690 // LOC_Os02g12380 // LOC_Os03g43400 // LOC_Os01g19694 // LOC_Os02g02100 // LOC_Os01g40260 // LOC_Os06g23170 // LOC_Os10g23090 // LOC_Os10g18099 // LOC_Os08g01700 // LOC_Os01g09100 // LOC_Os05g39720 // LOC_Os11g05480 // LOC_Os01g08190 // …
GO:0043232	C	intracellular non-membrane-bounded organelle	11	1247	1590	24460	1	1	// LOC_Os10g31630 // LOC_Os04g13530 // LOC_Os07g08710 // LOC_Os01g55510 // LOC_Os12g42850 // LOC_Os09g31031 // LOC_Os11g04070 // LOC_Os04g57440 // LOC_Os06g23170 // LOC_Os02g02100 // LOC_Os09g31019
GO:0044422	C	organelle part	10	1247	1518	24460	1	1	// LOC_Os10g31630 // LOC_Os01g55510 // LOC_Os07g05360 // LOC_Os04g13530 // LOC_Os06g23170 // LOC_Os03g59660 // LOC_Os02g02100 // LOC_Os09g37690 // LOC_Os07g08710 // LOC_Os01g42234
GO:0043229	C	intracellular organelle	100	1247	3164	24460	1	1	// LOC_Os01g61080 // LOC_Os08g38210 // LOC_Os06g17480 // LOC_Os09g35910 // LOC_Os07g05010 // LOC_Os03g51690 // LOC_Os07g48260 // LOC_Os03g59660 // LOC_Os09g37690 // LOC_Os02g12380 // LOC_Os03g43400 // LOC_Os01g19694 // LOC_Os02g02100 // LOC_Os09g31019 // LOC_Os01g40260 // LOC_Os06g23170 // LOC_Os10g23090 // LOC_Os10g31630 // LOC_Os10g18099 // LOC_Os08g01700 // LOC_Os01g09100 // LOC_Os05g39720 // …
GO:0043228	C	non-membrane-bounded organelle	11	1247	1590	24460	1	1	// LOC_Os10g31630 // LOC_Os04g13530 // LOC_Os07g08710 // LOC_Os01g55510 // LOC_Os12g42850 // LOC_Os09g31031 // LOC_Os11g04070 // LOC_Os04g57440 // LOC_Os06g23170 // LOC_Os02g02100 // LOC_Os09g31019
GO:0005623	C	cell	293	1247	6353	24460	0.98	1	// LOC_Os01g67810 // LOC_Os04g35270 // LOC_Os02g08364 // LOC_Os02g47090 // LOC_Os06g48060 // LOC_Os09g25640 // LOC_Os09g31478 // LOC_Os11g05700 // LOC_Os05g49420 // LOC_Os10g32110 // LOC_Os09g39760 // LOC_Os10g36924 // LOC_Os01g65380 // LOC_Os12g33300 // LOC_Os08g38210 // LOC_Os05g50610 // LOC_Os09g16510 // LOC_Os09g31970 // LOC_Os06g17480 // LOC_Os09g31019 // LOC_Os08g42440 // LOC_Os11g36400 // …
GO:0005622	C	intracellular	168	1247	4460	24460	1	1	// LOC_Os01g67810 // LOC_Os11g36400 // LOC_Os02g57700 // LOC_Os01g61080 // LOC_Os08g38210 // LOC_Os04g13530 // LOC_Os06g17480 // LOC_Os09g35910 // LOC_Os07g05010 // LOC_Os03g51690 // LOC_Os07g48260 // LOC_Os09g33550 // LOC_Os09g37690 // LOC_Os03g20910 // LOC_Os06g06130 // LOC_Os02g12380 // LOC_Os01g52260 // LOC_Os08g25720 // LOC_Os03g43400 // LOC_Os01g19694 // LOC_Os06g44010 // LOC_Os02g02100 // …
GO:0043227	C	membrane-bounded organelle	92	1247	2519	24460	1	1	// LOC_Os01g61080 // LOC_Os08g38210 // LOC_Os06g17480 // LOC_Os09g35910 // LOC_Os07g05010 // LOC_Os03g51690 // LOC_Os07g48260 // LOC_Os03g59660 // LOC_Os09g37690 // LOC_Os02g12380 // LOC_Os03g43400 // LOC_Os01g19694 // LOC_Os02g02100 // LOC_Os01g40260 // LOC_Os06g23170 // LOC_Os10g23090 // LOC_Os10g18099 // LOC_Os08g01700 // LOC_Os01g09100 // LOC_Os05g39720 // LOC_Os07g05360 // LOC_Os01g08190 // …
GO:0043226	C	organelle	100	1247	3164	24460	1	1	// LOC_Os01g61080 // LOC_Os08g38210 // LOC_Os06g17480 // LOC_Os09g35910 // LOC_Os07g05010 // LOC_Os03g51690 // LOC_Os07g48260 // LOC_Os03g59660 // LOC_Os09g37690 // LOC_Os02g12380 // LOC_Os03g43400 // LOC_Os01g19694 // LOC_Os02g02100 // LOC_Os09g31019 // LOC_Os01g40260 // LOC_Os06g23170 // LOC_Os10g23090 // LOC_Os10g31630 // LOC_Os10g18099 // LOC_Os08g01700 // LOC_Os01g09100 // LOC_Os05g39720 // …
GO:0044446	C	intracellular organelle part	10	1247	1518	24460	1	1	// LOC_Os10g31630 // LOC_Os01g55510 // LOC_Os07g05360 // LOC_Os04g13530 // LOC_Os06g23170 // LOC_Os03g59660 // LOC_Os02g02100 // LOC_Os09g37690 // LOC_Os07g08710 // LOC_Os01g42234
GO:0044444	C	cytoplasmic part	23	1247	960	24460	1	1	// LOC_Os01g67810 // LOC_Os07g34640 // LOC_Os11g36400 // LOC_Os01g52250 // LOC_Os03g56820 // LOC_Os04g57440 // LOC_Os01g67054 // LOC_Os06g45670 // LOC_Os01g42234 // LOC_Os02g55970 // LOC_Os12g06840 // LOC_Os05g10650 // LOC_Os10g08550 // LOC_Os03g59660 // LOC_Os09g37690 // LOC_Os01g67820 // LOC_Os05g44922 // LOC_Os06g13810 // LOC_Os09g31031 // LOC_Os08g25720 // LOC_Os09g31019 // LOC_Os12g42850 // …
GO:0005634	C	nucleus	85	1247	2173	24460	1	1	// LOC_Os02g08440 // LOC_Os10g18099 // LOC_Os01g19694 // LOC_Os05g07120 // LOC_Os08g01700 // LOC_Os01g51690 // LOC_Os01g09100 // LOC_Os01g63510 // LOC_Os11g05480 // LOC_Os03g43400 // LOC_Os04g40630 // LOC_Os07g48260 // LOC_Os02g39140 // LOC_Os01g14440 // LOC_Os05g38120 // LOC_Os04g13530 // LOC_Os01g08190 // LOC_Os01g47710 // LOC_Os08g38210 // LOC_Os03g10210 // LOC_Os08g36700 // LOC_Os03g21800 // …
GO:0030529	C	ribonucleoprotein complex	6	1247	503	24460	1	1	// LOC_Os01g52250 // LOC_Os12g42850 // LOC_Os09g31031 // LOC_Os11g04070 // LOC_Os04g57440 // LOC_Os09g31019
GO:0005737	C	cytoplasm	37	1247	1271	24460	1	1	// LOC_Os01g67810 // LOC_Os07g34640 // LOC_Os11g36400 // LOC_Os01g52250 // LOC_Os09g27510 // LOC_Os03g56820 // LOC_Os04g57440 // LOC_Os01g67054 // LOC_Os06g45670 // LOC_Os07g39690 // LOC_Os01g42234 // LOC_Os02g55970 // LOC_Os09g31019 // LOC_Os05g10650 // LOC_Os05g12770 // LOC_Os04g51880 // LOC_Os06g36560 // LOC_Os10g08550 // LOC_Os03g59660 // LOC_Os09g37690 // LOC_Os01g67820 // LOC_Os06g01590 // …
GO:0005840	C	ribosome	5	1247	456	24460	1	1	// LOC_Os04g57440 // LOC_Os09g31019 // LOC_Os12g42850 // LOC_Os09g31031 // LOC_Os11g04070
GO:0032991	C	macromolecular complex	41	1247	1365	24460	1	1	// LOC_Os10g31630 // LOC_Os01g67810 // LOC_Os02g08364 // LOC_Os01g55510 // LOC_Os01g52250 // LOC_Os07g05360 // LOC_Os01g19130 // LOC_Os04g57440 // LOC_Os04g34030 // LOC_Os12g44300 // LOC_Os01g08190 // LOC_Os07g08710 // LOC_Os01g42234 // LOC_Os02g55970 // LOC_Os12g06840 // LOC_Os05g10650 // LOC_Os01g65460 // LOC_Os11g36400 // LOC_Os12g19180 // LOC_Os04g13530 // LOC_Os03g10950 // LOC_Os10g08550 // …

## Sheet: down-regulated
Table S4. GO enrichmnet of DE genes
GO_acc	term_type	Term	queryitem	querytotal	bgitem	bgtotal	pvalue	FDR	entries
GO:0005975	P	carbohydrate metabolic process	72	942	864	24460	4.4e-09	8.3e-07	// LOC_Os03g14010 // LOC_Os03g06230 // LOC_Os02g12730 // LOC_Os01g71474 // LOC_Os01g59819 // LOC_Os02g35500 // LOC_Os03g52460 // LOC_Os04g41620 // LOC_Os06g24990 // LOC_Os09g36060 // LOC_Os09g31430 // LOC_Os01g70520 // LOC_Os06g50140 // LOC_Os08g34050 // LOC_Os05g49880 // LOC_Os10g40130 // LOC_Os04g41640 // LOC_Os01g71670 // LOC_Os05g23924 // LOC_Os10g32980 // LOC_Os03g28330 // LOC_Os07g49110 // …
GO:0010876	P	lipid localization	20	942	104	24460	3.1e-08	2e-06	// LOC_Os12g02300 // LOC_Os10g36160 // LOC_Os03g14642 // LOC_Os03g01300 // LOC_Os10g40420 // LOC_Os10g36100 // LOC_Os10g36110 // LOC_Os04g55170 // LOC_Os05g47730 // LOC_Os03g58940 // LOC_Os12g29040 // LOC_Os06g49190 // LOC_Os11g02369 // LOC_Os10g36090 // LOC_Os03g57970 // LOC_Os01g62980 // LOC_Os03g14654 // LOC_Os03g59380 // LOC_Os10g20890 // LOC_Os02g44320
GO:0006869	P	lipid transport	20	942	104	24460	3.1e-08	2e-06	// LOC_Os12g02300 // LOC_Os10g36160 // LOC_Os03g14642 // LOC_Os03g01300 // LOC_Os10g40420 // LOC_Os10g36100 // LOC_Os10g36110 // LOC_Os04g55170 // LOC_Os05g47730 // LOC_Os03g58940 // LOC_Os12g29040 // LOC_Os06g49190 // LOC_Os11g02369 // LOC_Os10g36090 // LOC_Os03g57970 // LOC_Os01g62980 // LOC_Os03g14654 // LOC_Os03g59380 // LOC_Os10g20890 // LOC_Os02g44320
GO:0006629	P	lipid metabolic process	41	942	492	24460	9.8e-06	0.00047	// LOC_Os01g22640 // LOC_Os04g56240 // LOC_Os04g59310 // LOC_Os06g03890 // LOC_Os01g46260 // LOC_Os06g15170 // LOC_Os12g41720 // LOC_Os04g35100 // LOC_Os02g58790 // LOC_Os11g01340 // LOC_Os12g34890 // LOC_Os02g37750 // LOC_Os02g37654 // LOC_Os04g36800 // LOC_Os07g49310 // LOC_Os12g37910 // LOC_Os03g19670 // LOC_Os01g46120 // LOC_Os10g30290 // LOC_Os01g12320 // LOC_Os12g01370 // LOC_Os03g38470 // …
GO:0016052	P	carbohydrate catabolic process	18	942	135	24460	1.6e-05	0.0005	// LOC_Os02g51590 // LOC_Os04g30770 // LOC_Os06g22060 // LOC_Os10g41550 // LOC_Os02g48360 // LOC_Os06g46372 // LOC_Os06g51060 // LOC_Os04g41620 // LOC_Os02g35500 // LOC_Os08g34050 // LOC_Os10g26570 // LOC_Os01g53930 // LOC_Os03g56280 // LOC_Os04g41680 // LOC_Os05g49880 // LOC_Os06g05860 // LOC_Os11g37970 // LOC_Os04g41640
GO:0009308	P	amine metabolic process	36	942	414	24460	1.5e-05	0.0005	// LOC_Os11g29370 // LOC_Os04g56400 // LOC_Os03g06620 // LOC_Os08g34720 // LOC_Os02g35500 // LOC_Os04g41620 // LOC_Os08g31060 // LOC_Os06g04070 // LOC_Os03g02690 // LOC_Os04g20164 // LOC_Os10g40130 // LOC_Os06g40940 // LOC_Os07g49110 // LOC_Os01g62900 // LOC_Os04g41640 // LOC_Os03g18130 // LOC_Os01g55870 // LOC_Os02g10310 // LOC_Os04g08350 // LOC_Os04g53230 // LOC_Os10g37180 // LOC_Os07g46460 // …
GO:0006006	P	glucose metabolic process	16	942	112	24460	2.2e-05	0.00059	// LOC_Os02g51590 // LOC_Os06g22060 // LOC_Os02g48360 // LOC_Os06g46372 // LOC_Os03g52460 // LOC_Os02g35500 // LOC_Os10g26570 // LOC_Os01g44220 // LOC_Os06g45590 // LOC_Os01g53930 // LOC_Os03g15050 // LOC_Os02g07490 // LOC_Os08g34050 // LOC_Os05g49880 // LOC_Os06g05860 // LOC_Os03g56280
GO:0006519	P	cellular amino acid and derivative metabolic process	35	942	408	24460	2.5e-05	0.00059	// LOC_Os11g29370 // LOC_Os04g56400 // LOC_Os03g06620 // LOC_Os08g34720 // LOC_Os02g19924 // LOC_Os01g12570 // LOC_Os01g62480 // LOC_Os08g31060 // LOC_Os12g02370 // LOC_Os06g04070 // LOC_Os03g02690 // LOC_Os06g40940 // LOC_Os05g44130 // LOC_Os01g62900 // LOC_Os03g60509 // LOC_Os02g35500 // LOC_Os03g18130 // LOC_Os01g55870 // LOC_Os02g10310 // LOC_Os04g08350 // LOC_Os04g53230 // LOC_Os10g37180 // …
GO:0044281	P	small molecule metabolic process	70	942	1079	24460	3.4e-05	0.00071	// LOC_Os03g63930 // LOC_Os04g56400 // LOC_Os08g34050 // LOC_Os03g06620 // LOC_Os08g34720 // LOC_Os11g29370 // LOC_Os07g34570 // LOC_Os03g52460 // LOC_Os07g31380 // LOC_Os01g12570 // LOC_Os03g60509 // LOC_Os01g62480 // LOC_Os01g73234 // LOC_Os08g31060 // LOC_Os06g15170 // LOC_Os12g02370 // LOC_Os05g49880 // LOC_Os06g04070 // LOC_Os03g02690 // LOC_Os03g56280 // LOC_Os02g43194 // LOC_Os08g31030 // …
GO:0006022	P	aminoglycan metabolic process	8	942	29	24460	5.1e-05	0.00098	// LOC_Os04g30770 // LOC_Os07g49110 // LOC_Os04g41620 // LOC_Os04g41640 // LOC_Os04g41680 // LOC_Os10g40130 // LOC_Os11g37970 // LOC_Os06g51060
GO:0055114	P	oxidation reduction	25	942	261	24460	7.1e-05	0.0012	// LOC_Os06g39708 // LOC_Os03g41510 // LOC_Os07g31380 // LOC_Os07g42924 // LOC_Os10g29470 // LOC_Os01g62480 // LOC_Os06g01850 // LOC_Os12g12590 // LOC_Os04g37480 // LOC_Os10g28320 // LOC_Os07g05400 // LOC_Os04g26870 // LOC_Os08g15322 // LOC_Os05g38230 // LOC_Os07g04990 // LOC_Os10g35960 // LOC_Os12g12580 // LOC_Os12g43363 // LOC_Os01g63190 // LOC_Os03g12910 // LOC_Os03g08570 // LOC_Os03g59100 // …
GO:0019318	P	hexose metabolic process	16	942	134	24460	0.00015	0.0024	// LOC_Os02g51590 // LOC_Os06g22060 // LOC_Os02g48360 // LOC_Os06g46372 // LOC_Os03g52460 // LOC_Os02g35500 // LOC_Os10g26570 // LOC_Os01g44220 // LOC_Os06g45590 // LOC_Os01g53930 // LOC_Os03g15050 // LOC_Os02g07490 // LOC_Os08g34050 // LOC_Os05g49880 // LOC_Os06g05860 // LOC_Os03g56280
GO:0015977	P	carbon fixation	5	942	11	24460	0.00022	0.0027	// LOC_Os01g58020 // LOC_Os12g10580 // LOC_Os12g19381 // LOC_Os10g21268 // LOC_Os12g17600
GO:0044283	P	small molecule biosynthetic process	26	942	297	24460	0.0002	0.0027	// LOC_Os11g29370 // LOC_Os04g56400 // LOC_Os03g06620 // LOC_Os08g34720 // LOC_Os07g34570 // LOC_Os01g12570 // LOC_Os12g34890 // LOC_Os06g15170 // LOC_Os12g02370 // LOC_Os06g04070 // LOC_Os03g02690 // LOC_Os01g62900 // LOC_Os03g60509 // LOC_Os01g54370 // LOC_Os03g15050 // LOC_Os04g36800 // LOC_Os01g55870 // LOC_Os04g08350 // LOC_Os03g18130 // LOC_Os12g16200 // LOC_Os07g46460 // LOC_Os01g12560 // …
GO:0071704	P	organic substance metabolic process	5	942	11	24460	0.00022	0.0027	// LOC_Os01g58020 // LOC_Os12g10580 // LOC_Os12g19381 // LOC_Os10g21268 // LOC_Os12g17600
GO:0005976	P	polysaccharide metabolic process	16	942	140	24460	0.00023	0.0028	// LOC_Os04g30770 // LOC_Os07g22930 // LOC_Os03g13570 // LOC_Os07g49110 // LOC_Os04g41620 // LOC_Os03g52460 // LOC_Os04g41640 // LOC_Os03g01800 // LOC_Os01g44220 // LOC_Os01g54620 // LOC_Os10g41550 // LOC_Os10g32980 // LOC_Os04g41680 // LOC_Os10g40130 // LOC_Os11g37970 // LOC_Os06g51060
GO:0044282	P	small molecule catabolic process	16	942	143	24460	0.00029	0.0033	// LOC_Os02g51590 // LOC_Os01g63190 // LOC_Os06g05860 // LOC_Os10g37180 // LOC_Os02g48360 // LOC_Os06g46372 // LOC_Os02g35500 // LOC_Os01g62480 // LOC_Os08g34050 // LOC_Os10g26570 // LOC_Os01g53930 // LOC_Os06g22060 // LOC_Os05g49880 // LOC_Os06g04070 // LOC_Os03g56280 // LOC_Os04g53230
GO:0043436	P	oxoacid metabolic process	36	942	490	24460	0.00034	0.0034	// LOC_Os11g29370 // LOC_Os04g56400 // LOC_Os03g06620 // LOC_Os08g34720 // LOC_Os07g31380 // LOC_Os06g15170 // LOC_Os03g56280 // LOC_Os06g04070 // LOC_Os03g02690 // LOC_Os05g49880 // LOC_Os06g40940 // LOC_Os01g62900 // LOC_Os12g34890 // LOC_Os02g35500 // LOC_Os03g15050 // LOC_Os04g36800 // LOC_Os01g55870 // LOC_Os02g10310 // LOC_Os04g08350 // LOC_Os04g53230 // LOC_Os10g37180 // LOC_Os03g18130 // …
GO:0006082	P	organic acid metabolic process	36	942	491	24460	0.00035	0.0034	// LOC_Os11g29370 // LOC_Os04g56400 // LOC_Os03g06620 // LOC_Os08g34720 // LOC_Os07g31380 // LOC_Os06g15170 // LOC_Os03g56280 // LOC_Os06g04070 // LOC_Os03g02690 // LOC_Os05g49880 // LOC_Os06g40940 // LOC_Os01g62900 // LOC_Os12g34890 // LOC_Os02g35500 // LOC_Os03g15050 // LOC_Os04g36800 // LOC_Os01g55870 // LOC_Os02g10310 // LOC_Os04g08350 // LOC_Os04g53230 // LOC_Os10g37180 // LOC_Os03g18130 // …
GO:0019752	P	carboxylic acid metabolic process	36	942	490	24460	0.00034	0.0034	// LOC_Os11g29370 // LOC_Os04g56400 // LOC_Os03g06620 // LOC_Os08g34720 // LOC_Os07g31380 // LOC_Os06g15170 // LOC_Os03g56280 // LOC_Os06g04070 // LOC_Os03g02690 // LOC_Os05g49880 // LOC_Os06g40940 // LOC_Os01g62900 // LOC_Os12g34890 // LOC_Os02g35500 // LOC_Os03g15050 // LOC_Os04g36800 // LOC_Os01g55870 // LOC_Os02g10310 // LOC_Os04g08350 // LOC_Os04g53230 // LOC_Os10g37180 // LOC_Os03g18130 // …
GO:0042180	P	cellular ketone metabolic process	36	942	496	24460	0.00042	0.0038	// LOC_Os11g29370 // LOC_Os04g56400 // LOC_Os03g06620 // LOC_Os08g34720 // LOC_Os07g31380 // LOC_Os06g15170 // LOC_Os03g56280 // LOC_Os06g04070 // LOC_Os03g02690 // LOC_Os05g49880 // LOC_Os06g40940 // LOC_Os01g62900 // LOC_Os12g34890 // LOC_Os02g35500 // LOC_Os03g15050 // LOC_Os04g36800 // LOC_Os01g55870 // LOC_Os02g10310 // LOC_Os04g08350 // LOC_Os04g53230 // LOC_Os10g37180 // LOC_Os03g18130 // …
GO:0006808	P	regulation of nitrogen utilization	6	942	22	24460	0.00048	0.004	// LOC_Os03g15360 // LOC_Os12g16220 // LOC_Os01g01650 // LOC_Os02g47610 // LOC_Os12g16240 // LOC_Os01g01660
GO:0019740	P	nitrogen utilization	6	942	22	24460	0.00048	0.004	// LOC_Os03g15360 // LOC_Os12g16220 // LOC_Os01g01650 // LOC_Os02g47610 // LOC_Os12g16240 // LOC_Os01g01660
GO:0005996	P	monosaccharide metabolic process	16	942	151	24460	0.0005	0.004	// LOC_Os02g51590 // LOC_Os06g22060 // LOC_Os02g48360 // LOC_Os06g46372 // LOC_Os03g52460 // LOC_Os02g35500 // LOC_Os10g26570 // LOC_Os01g44220 // LOC_Os06g45590 // LOC_Os01g53930 // LOC_Os03g15050 // LOC_Os02g07490 // LOC_Os08g34050 // LOC_Os05g49880 // LOC_Os06g05860 // LOC_Os03g56280
GO:0006066	P	alcohol metabolic process	19	942	199	24460	0.00052	0.004	// LOC_Os02g51590 // LOC_Os08g31030 // LOC_Os06g22060 // LOC_Os03g02740 // LOC_Os02g48360 // LOC_Os06g46372 // LOC_Os03g52460 // LOC_Os08g31060 // LOC_Os02g35500 // LOC_Os10g26570 // LOC_Os01g44220 // LOC_Os06g45590 // LOC_Os01g53930 // LOC_Os03g15050 // LOC_Os02g07490 // LOC_Os08g34050 // LOC_Os05g49880 // LOC_Os06g05860 // LOC_Os03g56280
GO:0006026	P	aminoglycan catabolic process	6	942	26	24460	0.001	0.006	// LOC_Os04g30770 // LOC_Os06g51060 // LOC_Os04g41620 // LOC_Os04g41680 // LOC_Os11g37970 // LOC_Os04g41640
GO:0015833	P	peptide transport	12	942	101	24460	0.001	0.006	// LOC_Os10g02260 // LOC_Os05g27304 // LOC_Os01g65210 // LOC_Os01g68510 // LOC_Os10g33170 // LOC_Os10g02220 // LOC_Os11g17970 // LOC_Os01g65100 // LOC_Os02g48570 // LOC_Os11g18044 // LOC_Os06g49210 // LOC_Os01g37590
GO:0006030	P	chitin metabolic process	6	942	26	24460	0.001	0.006	// LOC_Os04g30770 // LOC_Os06g51060 // LOC_Os04g41620 // LOC_Os04g41680 // LOC_Os11g37970 // LOC_Os04g41640
GO:0006032	P	chitin catabolic process	6	942	26	24460	0.001	0.006	// LOC_Os04g30770 // LOC_Os06g51060 // LOC_Os04g41620 // LOC_Os04g41680 // LOC_Os11g37970 // LOC_Os04g41640
GO:0006857	P	oligopeptide transport	12	942	101	24460	0.001	0.006	// LOC_Os10g02260 // LOC_Os05g27304 // LOC_Os01g65210 // LOC_Os01g68510 // LOC_Os10g33170 // LOC_Os10g02220 // LOC_Os11g17970 // LOC_Os01g65100 // LOC_Os02g48570 // LOC_Os11g18044 // LOC_Os06g49210 // LOC_Os01g37590
GO:0000272	P	polysaccharide catabolic process	7	942	36	24460	0.00095	0.006	// LOC_Os04g30770 // LOC_Os06g51060 // LOC_Os04g41620 // LOC_Os10g41550 // LOC_Os04g41680 // LOC_Os11g37970 // LOC_Os04g41640
GO:0009057	P	macromolecule catabolic process	25	942	312	24460	0.00086	0.006	// LOC_Os01g62500 // LOC_Os08g34050 // LOC_Os04g41620 // LOC_Os01g03290 // LOC_Os01g61700 // LOC_Os03g56280 // LOC_Os02g35500 // LOC_Os05g49880 // LOC_Os04g41640 // LOC_Os06g51060 // LOC_Os01g03300 // LOC_Os05g06100 // LOC_Os07g07310 // LOC_Os10g26570 // LOC_Os10g41550 // LOC_Os02g51590 // LOC_Os11g37970 // LOC_Os04g30770 // LOC_Os06g22060 // LOC_Os02g48360 // LOC_Os06g46372 // LOC_Os12g13360 // …
GO:0019320	P	hexose catabolic process	11	942	92	24460	0.0015	0.0079	// LOC_Os02g51590 // LOC_Os06g22060 // LOC_Os02g48360 // LOC_Os06g46372 // LOC_Os02g35500 // LOC_Os10g26570 // LOC_Os01g53930 // LOC_Os08g34050 // LOC_Os05g49880 // LOC_Os06g05860 // LOC_Os03g56280
GO:0006810	P	transport	88	942	1639	24460	0.0015	0.0079	// LOC_Os12g32940 // LOC_Os04g56240 // LOC_Os01g62980 // LOC_Os03g10090 // LOC_Os05g27100 // LOC_Os10g02260 // LOC_Os07g38400 // LOC_Os10g40420 // LOC_Os10g36100 // LOC_Os09g09830 // LOC_Os11g24450 // LOC_Os09g27580 // LOC_Os11g02369 // LOC_Os10g19190 // LOC_Os01g51380 // LOC_Os04g55170 // LOC_Os05g27304 // LOC_Os02g57350 // LOC_Os11g42490 // LOC_Os10g20350 // LOC_Os12g07110 // LOC_Os06g10810 // …
GO:0051234	P	establishment of localization	88	942	1639	24460	0.0015	0.0079	// LOC_Os12g32940 // LOC_Os04g56240 // LOC_Os01g62980 // LOC_Os03g10090 // LOC_Os05g27100 // LOC_Os10g02260 // LOC_Os07g38400 // LOC_Os10g40420 // LOC_Os10g36100 // LOC_Os09g09830 // LOC_Os11g24450 // LOC_Os09g27580 // LOC_Os11g02369 // LOC_Os10g19190 // LOC_Os01g51380 // LOC_Os04g55170 // LOC_Os05g27304 // LOC_Os02g57350 // LOC_Os11g42490 // LOC_Os10g20350 // LOC_Os12g07110 // LOC_Os06g10810 // …
GO:0006007	P	glucose catabolic process	11	942	92	24460	0.0015	0.0079	// LOC_Os02g51590 // LOC_Os06g22060 // LOC_Os02g48360 // LOC_Os06g46372 // LOC_Os02g35500 // LOC_Os10g26570 // LOC_Os01g53930 // LOC_Os08g34050 // LOC_Os05g49880 // LOC_Os06g05860 // LOC_Os03g56280
GO:0046365	P	monosaccharide catabolic process	11	942	92	24460	0.0015	0.0079	// LOC_Os02g51590 // LOC_Os06g22060 // LOC_Os02g48360 // LOC_Os06g46372 // LOC_Os02g35500 // LOC_Os10g26570 // LOC_Os01g53930 // LOC_Os08g34050 // LOC_Os05g49880 // LOC_Os06g05860 // LOC_Os03g56280
GO:0006575	P	cellular amino acid derivative metabolic process	10	942	79	24460	0.0017	0.0084	// LOC_Os01g63190 // LOC_Os12g16200 // LOC_Os01g12560 // LOC_Os01g12570 // LOC_Os03g60509 // LOC_Os01g62480 // LOC_Os08g31060 // LOC_Os03g02740 // LOC_Os12g02370 // LOC_Os06g04070
GO:0051179	P	localization	88	942	1658	24460	0.0021	0.01	// LOC_Os12g32940 // LOC_Os04g56240 // LOC_Os01g62980 // LOC_Os03g10090 // LOC_Os05g27100 // LOC_Os10g02260 // LOC_Os07g38400 // LOC_Os10g40420 // LOC_Os10g36100 // LOC_Os09g09830 // LOC_Os11g24450 // LOC_Os09g27580 // LOC_Os11g02369 // LOC_Os10g19190 // LOC_Os01g51380 // LOC_Os04g55170 // LOC_Os05g27304 // LOC_Os02g57350 // LOC_Os11g42490 // LOC_Os10g20350 // LOC_Os12g07110 // LOC_Os06g10810 // …
GO:0046164	P	alcohol catabolic process	11	942	98	24460	0.0024	0.011	// LOC_Os02g51590 // LOC_Os06g22060 // LOC_Os02g48360 // LOC_Os06g46372 // LOC_Os02g35500 // LOC_Os10g26570 // LOC_Os01g53930 // LOC_Os08g34050 // LOC_Os05g49880 // LOC_Os06g05860 // LOC_Os03g56280
GO:0044275	P	cellular carbohydrate catabolic process	11	942	98	24460	0.0024	0.011	// LOC_Os02g51590 // LOC_Os06g22060 // LOC_Os02g48360 // LOC_Os06g46372 // LOC_Os02g35500 // LOC_Os10g26570 // LOC_Os01g53930 // LOC_Os08g34050 // LOC_Os05g49880 // LOC_Os06g05860 // LOC_Os03g56280
GO:0009056	P	catabolic process	30	942	438	24460	0.0028	0.013	// LOC_Os01g62500 // LOC_Os04g41640 // LOC_Os02g35500 // LOC_Os04g41620 // LOC_Os01g03290 // LOC_Os01g61700 // LOC_Os01g62480 // LOC_Os08g34050 // LOC_Os03g56280 // LOC_Os06g04070 // LOC_Os05g49880 // LOC_Os06g51060 // LOC_Os01g03300 // LOC_Os04g53230 // LOC_Os05g06100 // LOC_Os10g37180 // LOC_Os07g07310 // LOC_Os10g26570 // LOC_Os10g41550 // LOC_Os02g51590 // LOC_Os11g37970 // LOC_Os04g30770 // …
GO:0042398	P	cellular amino acid derivative biosynthetic process	6	942	34	24460	0.0033	0.014	// LOC_Os12g16200 // LOC_Os01g12560 // LOC_Os01g12570 // LOC_Os03g60509 // LOC_Os12g02370 // LOC_Os06g04070
GO:0044106	P	cellular amine metabolic process	26	942	366	24460	0.0033	0.014	// LOC_Os11g29370 // LOC_Os04g56400 // LOC_Os03g06620 // LOC_Os08g34720 // LOC_Os08g31060 // LOC_Os06g40940 // LOC_Os03g02690 // LOC_Os06g04070 // LOC_Os01g62900 // LOC_Os02g35500 // LOC_Os03g18130 // LOC_Os01g55870 // LOC_Os02g10310 // LOC_Os04g08350 // LOC_Os04g53230 // LOC_Os10g37180 // LOC_Os07g46460 // LOC_Os03g02740 // LOC_Os10g37340 // LOC_Os06g46372 // LOC_Os01g03030 // LOC_Os12g38900 // …
GO:0016053	P	organic acid biosynthetic process	17	942	203	24460	0.0036	0.015	// LOC_Os11g29370 // LOC_Os12g38900 // LOC_Os08g34720 // LOC_Os12g43363 // LOC_Os03g63930 // LOC_Os04g08350 // LOC_Os07g46460 // LOC_Os01g62900 // LOC_Os12g34890 // LOC_Os04g56400 // LOC_Os03g18130 // LOC_Os06g15170 // LOC_Os04g36800 // LOC_Os01g55870 // LOC_Os03g02690 // LOC_Os06g15020 // LOC_Os03g06620
GO:0046394	P	carboxylic acid biosynthetic process	17	942	203	24460	0.0036	0.015	// LOC_Os11g29370 // LOC_Os12g38900 // LOC_Os08g34720 // LOC_Os12g43363 // LOC_Os03g63930 // LOC_Os04g08350 // LOC_Os07g46460 // LOC_Os01g62900 // LOC_Os12g34890 // LOC_Os04g56400 // LOC_Os03g18130 // LOC_Os06g15170 // LOC_Os04g36800 // LOC_Os01g55870 // LOC_Os03g02690 // LOC_Os06g15020 // LOC_Os03g06620
GO:0006096	P	glycolysis	9	942	74	24460	0.0036	0.015	// LOC_Os02g51590 // LOC_Os06g22060 // LOC_Os02g48360 // LOC_Os10g26570 // LOC_Os01g53930 // LOC_Os08g34050 // LOC_Os05g49880 // LOC_Os06g05860 // LOC_Os03g56280
GO:0006520	P	cellular amino acid metabolic process	24	942	332	24460	0.0038	0.015	// LOC_Os11g29370 // LOC_Os04g56400 // LOC_Os03g06620 // LOC_Os08g34720 // LOC_Os06g40940 // LOC_Os03g02690 // LOC_Os06g04070 // LOC_Os01g62900 // LOC_Os02g35500 // LOC_Os03g18130 // LOC_Os01g55870 // LOC_Os02g10310 // LOC_Os04g08350 // LOC_Os04g53230 // LOC_Os10g37180 // LOC_Os07g46460 // LOC_Os10g37340 // LOC_Os06g46372 // LOC_Os01g03030 // LOC_Os12g38900 // LOC_Os06g48620 // LOC_Os10g38920 // …
GO:0044036	P	cell wall macromolecule metabolic process	7	942	48	24460	0.0041	0.016	// LOC_Os07g49110 // LOC_Os04g41620 // LOC_Os04g41640 // LOC_Os04g41680 // LOC_Os10g40130 // LOC_Os11g37970 // LOC_Os06g51060
GO:0034641	P	cellular nitrogen compound metabolic process	31	942	473	24460	0.0044	0.017	// LOC_Os11g29370 // LOC_Os04g56400 // LOC_Os03g06620 // LOC_Os08g34720 // LOC_Os07g34570 // LOC_Os08g31060 // LOC_Os10g37180 // LOC_Os06g04070 // LOC_Os03g02690 // LOC_Os06g40940 // LOC_Os06g04150 // LOC_Os01g62900 // LOC_Os02g35500 // LOC_Os03g18130 // LOC_Os01g55870 // LOC_Os02g10310 // LOC_Os04g08350 // LOC_Os04g53230 // LOC_Os02g07230 // LOC_Os07g46460 // LOC_Os03g36540 // LOC_Os03g02740 // …
GO:0009064	P	glutamine family amino acid metabolic process	6	942	40	24460	0.0068	0.025	// LOC_Os04g56400 // LOC_Os07g46460 // LOC_Os01g62900 // LOC_Os06g48620 // LOC_Os05g44130 // LOC_Os06g04070
GO:0043648	P	dicarboxylic acid metabolic process	7	942	56	24460	0.0086	0.031	// LOC_Os10g35960 // LOC_Os12g38900 // LOC_Os07g31380 // LOC_Os03g56280 // LOC_Os05g49880 // LOC_Os03g02690 // LOC_Os01g55870
GO:0044271	P	cellular nitrogen compound biosynthetic process	17	942	232	24460	0.012	0.043	// LOC_Os11g29370 // LOC_Os12g38900 // LOC_Os02g07230 // LOC_Os03g06620 // LOC_Os08g34720 // LOC_Os07g34570 // LOC_Os04g08350 // LOC_Os06g04150 // LOC_Os07g46460 // LOC_Os01g62900 // LOC_Os03g36540 // LOC_Os04g56400 // LOC_Os03g18130 // LOC_Os01g55870 // LOC_Os06g04070 // LOC_Os03g02690 // LOC_Os01g54370
GO:0019748	P	secondary metabolic process	7	942	61	24460	0.013	0.045	// LOC_Os01g63190 // LOC_Os06g46372 // LOC_Os03g60509 // LOC_Os03g08570 // LOC_Os01g62480 // LOC_Os12g02370 // LOC_Os02g35500
GO:0006790	P	sulfur metabolic process	7	942	63	24460	0.015	0.052	// LOC_Os11g29370 // LOC_Os11g41650 // LOC_Os03g06620 // LOC_Os12g16200 // LOC_Os07g34570 // LOC_Os04g08350 // LOC_Os02g56170
GO:0008652	P	cellular amino acid biosynthetic process	11	942	129	24460	0.015	0.052	// LOC_Os11g29370 // LOC_Os12g38900 // LOC_Os03g06620 // LOC_Os08g34720 // LOC_Os03g02690 // LOC_Os07g46460 // LOC_Os01g62900 // LOC_Os04g56400 // LOC_Os03g18130 // LOC_Os01g55870 // LOC_Os04g08350
GO:0044262	P	cellular carbohydrate metabolic process	24	942	379	24460	0.016	0.054	// LOC_Os08g34050 // LOC_Os03g52460 // LOC_Os05g49880 // LOC_Os10g32980 // LOC_Os03g56280 // LOC_Os03g28330 // LOC_Os07g22930 // LOC_Os02g35500 // LOC_Os03g15050 // LOC_Os02g07490 // LOC_Os03g13570 // LOC_Os01g54620 // LOC_Os01g44220 // LOC_Os10g26570 // LOC_Os07g30160 // LOC_Os02g51590 // LOC_Os06g22060 // LOC_Os02g58480 // LOC_Os06g46372 // LOC_Os02g48360 // LOC_Os03g01800 // LOC_Os06g45590 // …
GO:0009069	P	serine family amino acid metabolic process	5	942	36	24460	0.017	0.055	// LOC_Os10g37180 // LOC_Os06g40940 // LOC_Os04g08350 // LOC_Os08g34720 // LOC_Os04g53230
GO:0009309	P	amine biosynthetic process	12	942	149	24460	0.017	0.055	// LOC_Os11g29370 // LOC_Os12g38900 // LOC_Os03g06620 // LOC_Os08g34720 // LOC_Os03g02690 // LOC_Os07g46460 // LOC_Os01g62900 // LOC_Os04g56400 // LOC_Os03g18130 // LOC_Os01g55870 // LOC_Os06g04070 // LOC_Os04g08350
GO:0044248	P	cellular catabolic process	21	942	326	24460	0.02	0.063	// LOC_Os02g51590 // LOC_Os01g63190 // LOC_Os05g06100 // LOC_Os06g05860 // LOC_Os10g37180 // LOC_Os02g48360 // LOC_Os06g46372 // LOC_Os02g35500 // LOC_Os01g03290 // LOC_Os07g07310 // LOC_Os01g03300 // LOC_Os01g62480 // LOC_Os08g34050 // LOC_Os10g26570 // LOC_Os12g13360 // LOC_Os01g53930 // LOC_Os06g22060 // LOC_Os05g49880 // LOC_Os06g04070 // LOC_Os03g56280 // LOC_Os04g53230
GO:0032502	P	developmental process	5	942	41	24460	0.027	0.084	// LOC_Os05g06100 // LOC_Os10g40130 // LOC_Os11g32960 // LOC_Os01g03290 // LOC_Os01g03300
GO:0000271	P	polysaccharide biosynthetic process	7	942	73	24460	0.029	0.088	// LOC_Os10g40130 // LOC_Os07g49110 // LOC_Os07g22930 // LOC_Os01g54620 // LOC_Os01g44220 // LOC_Os10g32980 // LOC_Os03g52460
GO:0016998	P	cell wall macromolecule catabolic process	5	942	45	24460	0.037	0.11	// LOC_Os04g41680 // LOC_Os06g51060 // LOC_Os04g41620 // LOC_Os11g37970 // LOC_Os04g41640
GO:0044265	P	cellular macromolecule catabolic process	16	942	248	24460	0.038	0.11	// LOC_Os02g51590 // LOC_Os05g06100 // LOC_Os06g22060 // LOC_Os02g48360 // LOC_Os06g46372 // LOC_Os02g35500 // LOC_Os01g03290 // LOC_Os07g07310 // LOC_Os01g03300 // LOC_Os10g26570 // LOC_Os12g13360 // LOC_Os01g53930 // LOC_Os08g34050 // LOC_Os05g49880 // LOC_Os06g05860 // LOC_Os03g56280
GO:0008610	P	lipid biosynthetic process	11	942	151	24460	0.039	0.11	// LOC_Os12g43363 // LOC_Os03g63930 // LOC_Os12g34890 // LOC_Os03g08570 // LOC_Os04g56230 // LOC_Os06g15170 // LOC_Os04g36800 // LOC_Os02g58790 // LOC_Os03g29150 // LOC_Os06g15020 // LOC_Os01g50050
GO:0032787	P	monocarboxylic acid metabolic process	9	942	115	24460	0.041	0.12	// LOC_Os12g43363 // LOC_Os03g63930 // LOC_Os12g34890 // LOC_Os06g48620 // LOC_Os01g24680 // LOC_Os03g15050 // LOC_Os06g15170 // LOC_Os04g36800 // LOC_Os06g15020
GO:0016051	P	carbohydrate biosynthetic process	9	942	116	24460	0.043	0.12	// LOC_Os10g32980 // LOC_Os07g49110 // LOC_Os07g22930 // LOC_Os01g54620 // LOC_Os01g44220 // LOC_Os03g15050 // LOC_Os07g30160 // LOC_Os10g40130 // LOC_Os03g52460
GO:0044092	P	negative regulation of molecular function	5	942	48	24460	0.046	0.13	// LOC_Os03g40830 // LOC_Os01g52750 // LOC_Os04g03810 // LOC_Os01g64860 // LOC_Os04g03050
GO:0006631	P	fatty acid metabolic process	7	942	81	24460	0.045	0.13	// LOC_Os12g43363 // LOC_Os03g63930 // LOC_Os12g34890 // LOC_Os01g24680 // LOC_Os06g15170 // LOC_Os04g36800 // LOC_Os06g15020
GO:0043086	P	negative regulation of catalytic activity	5	942	48	24460	0.046	0.13	// LOC_Os03g40830 // LOC_Os01g52750 // LOC_Os04g03810 // LOC_Os01g64860 // LOC_Os04g03050
GO:0015979	P	photosynthesis	8	942	100	24460	0.048	0.13	// LOC_Os06g39708 // LOC_Os02g36850 // LOC_Os03g36540 // LOC_Os01g58049 // LOC_Os01g65902 // LOC_Os07g01480 // LOC_Os06g04150 // LOC_Os08g15322
GO:0006633	P	fatty acid biosynthetic process	6	942	65	24460	0.048	0.13	// LOC_Os12g43363 // LOC_Os03g63930 // LOC_Os12g34890 // LOC_Os06g15170 // LOC_Os04g36800 // LOC_Os06g15020
GO:0044272	P	sulfur compound biosynthetic process	5	942	49	24460	0.049	0.13	// LOC_Os12g16200 // LOC_Os11g29370 // LOC_Os07g34570 // LOC_Os04g08350 // LOC_Os03g06620
GO:0042493	P	response to drug	6	942	66	24460	0.051	0.13	// LOC_Os03g42830 // LOC_Os01g49120 // LOC_Os10g20350 // LOC_Os10g20390 // LOC_Os03g37470 // LOC_Os12g03950
GO:0015893	P	drug transport	6	942	66	24460	0.051	0.13	// LOC_Os03g42830 // LOC_Os01g49120 // LOC_Os10g20350 // LOC_Os10g20390 // LOC_Os03g37470 // LOC_Os12g03950
GO:0019438	P	aromatic compound biosynthetic process	5	942	52	24460	0.06	0.15	// LOC_Os07g34570 // LOC_Os12g02370 // LOC_Os01g55870 // LOC_Os12g38900 // LOC_Os03g60509
GO:0071554	P	cell wall organization or biogenesis	10	942	146	24460	0.066	0.16	// LOC_Os03g25990 // LOC_Os04g46740 // LOC_Os07g49110 // LOC_Os04g41620 // LOC_Os04g41640 // LOC_Os01g19440 // LOC_Os04g41680 // LOC_Os10g40130 // LOC_Os11g37970 // LOC_Os06g51060
GO:0006813	P	potassium ion transport	5	942	55	24460	0.071	0.17	// LOC_Os03g37840 // LOC_Os06g15910 // LOC_Os09g27580 // LOC_Os08g36340 // LOC_Os08g10550
GO:0051188	P	cofactor biosynthetic process	7	942	92	24460	0.075	0.18	// LOC_Os12g16200 // LOC_Os01g12560 // LOC_Os06g48620 // LOC_Os03g36540 // LOC_Os06g05400 // LOC_Os01g12570 // LOC_Os06g04150
GO:0006725	P	cellular aromatic compound metabolic process	10	942	150	24460	0.075	0.18	// LOC_Os01g63190 // LOC_Os12g38900 // LOC_Os03g60509 // LOC_Os06g48620 // LOC_Os01g62480 // LOC_Os07g34570 // LOC_Os12g02370 // LOC_Os01g55870 // LOC_Os02g10310 // LOC_Os01g54370
GO:0033036	P	macromolecule localization	22	942	408	24460	0.081	0.19	// LOC_Os03g14642 // LOC_Os03g01300 // LOC_Os01g24060 // LOC_Os06g49190 // LOC_Os01g62980 // LOC_Os10g36160 // LOC_Os10g40420 // LOC_Os10g36100 // LOC_Os11g02369 // LOC_Os03g14654 // LOC_Os05g47730 // LOC_Os02g44320 // LOC_Os04g55170 // LOC_Os03g58940 // LOC_Os03g57970 // LOC_Os10g36090 // LOC_Os10g20890 // LOC_Os12g02300 // LOC_Os10g36110 // LOC_Os03g59380 // LOC_Os12g29040 // LOC_Os01g16030
GO:0006073	P	cellular glucan metabolic process	7	942	95	24460	0.085	0.19	// LOC_Os01g54620 // LOC_Os03g13570 // LOC_Os03g52460 // LOC_Os07g22930 // LOC_Os03g01800 // LOC_Os01g44220 // LOC_Os10g32980
GO:0044042	P	glucan metabolic process	7	942	95	24460	0.085	0.19	// LOC_Os01g54620 // LOC_Os03g13570 // LOC_Os03g52460 // LOC_Os07g22930 // LOC_Os03g01800 // LOC_Os01g44220 // LOC_Os10g32980
GO:0042221	P	response to chemical stimulus	17	942	308	24460	0.099	0.22	// LOC_Os07g06175 // LOC_Os02g02400 // LOC_Os01g49120 // LOC_Os03g22010 // LOC_Os10g20350 // LOC_Os02g58720 // LOC_Os03g13200 // LOC_Os10g20390 // LOC_Os02g14440 // LOC_Os03g42830 // LOC_Os06g27850 // LOC_Os03g37470 // LOC_Os02g14460 // LOC_Os12g03950 // LOC_Os01g48060 // LOC_Os05g04500 // LOC_Os07g06380
GO:0044264	P	cellular polysaccharide metabolic process	7	942	100	24460	0.1	0.23	// LOC_Os01g54620 // LOC_Os03g13570 // LOC_Os03g52460 // LOC_Os07g22930 // LOC_Os03g01800 // LOC_Os01g44220 // LOC_Os10g32980
GO:0006855	P	multidrug transport	5	942	63	24460	0.11	0.24	// LOC_Os03g37470 // LOC_Os10g20350 // LOC_Os03g42830 // LOC_Os10g20390 // LOC_Os01g49120
GO:0030001	P	metal ion transport	13	942	225	24460	0.11	0.24	// LOC_Os03g37840 // LOC_Os04g51610 // LOC_Os04g33900 // LOC_Os06g15910 // LOC_Os09g09830 // LOC_Os04g32820 // LOC_Os08g36340 // LOC_Os09g27580 // LOC_Os08g10550 // LOC_Os02g57350 // LOC_Os05g27100 // LOC_Os09g31130 // LOC_Os06g37010
GO:0051186	P	cofactor metabolic process	9	942	142	24460	0.11	0.24	// LOC_Os06g05400 // LOC_Os06g46372 // LOC_Os01g12560 // LOC_Os06g48620 // LOC_Os03g36540 // LOC_Os12g16200 // LOC_Os01g12570 // LOC_Os02g35500 // LOC_Os06g04150
GO:0009250	P	glucan biosynthetic process	5	942	65	24460	0.12	0.25	// LOC_Os10g32980 // LOC_Os01g44220 // LOC_Os03g52460 // LOC_Os07g22930 // LOC_Os01g54620
GO:0065008	P	regulation of biological quality	10	942	169	24460	0.13	0.27	// LOC_Os01g68480 // LOC_Os08g44400 // LOC_Os12g18360 // LOC_Os04g43290 // LOC_Os01g73234 // LOC_Os06g21550 // LOC_Os10g40130 // LOC_Os04g57930 // LOC_Os04g42930 // LOC_Os03g44820
GO:0034637	P	cellular carbohydrate biosynthetic process	7	942	110	24460	0.14	0.3	// LOC_Os03g52460 // LOC_Os07g22930 // LOC_Os01g54620 // LOC_Os01g44220 // LOC_Os03g15050 // LOC_Os07g30160 // LOC_Os10g32980
GO:0033692	P	cellular polysaccharide biosynthetic process	5	942	70	24460	0.15	0.3	// LOC_Os10g32980 // LOC_Os01g44220 // LOC_Os03g52460 // LOC_Os07g22930 // LOC_Os01g54620
GO:0032501	P	multicellular organismal process	9	942	155	24460	0.16	0.32	// LOC_Os05g06100 // LOC_Os04g42740 // LOC_Os04g34250 // LOC_Os01g66610 // LOC_Os04g54070 // LOC_Os11g32960 // LOC_Os01g03290 // LOC_Os01g03300 // LOC_Os04g56090
GO:0044255	P	cellular lipid metabolic process	12	942	221	24460	0.16	0.32	// LOC_Os12g43363 // LOC_Os03g63930 // LOC_Os12g34890 // LOC_Os08g31060 // LOC_Os03g08570 // LOC_Os04g56230 // LOC_Os01g24680 // LOC_Os03g02740 // LOC_Os06g15170 // LOC_Os04g36800 // LOC_Os06g15020 // LOC_Os01g50050
GO:0045454	P	cell redox homeostasis	7	942	114	24460	0.16	0.32	// LOC_Os01g68480 // LOC_Os08g44400 // LOC_Os12g18360 // LOC_Os01g73234 // LOC_Os06g21550 // LOC_Os04g57930 // LOC_Os04g42930
GO:0006811	P	ion transport	22	942	450	24460	0.16	0.32	// LOC_Os03g37840 // LOC_Os04g51610 // LOC_Os05g42250 // LOC_Os06g37010 // LOC_Os05g27100 // LOC_Os03g55100 // LOC_Os06g15910 // LOC_Os09g09830 // LOC_Os06g05160 // LOC_Os08g36340 // LOC_Os09g27580 // LOC_Os02g57350 // LOC_Os10g31040 // LOC_Os06g08080 // LOC_Os06g10580 // LOC_Os04g33900 // LOC_Os01g51380 // LOC_Os01g37690 // LOC_Os08g10550 // LOC_Os03g03590 // LOC_Os09g31130 // LOC_Os04g32820
GO:0006732	P	coenzyme metabolic process	6	942	100	24460	0.2	0.39	// LOC_Os06g46372 // LOC_Os01g12560 // LOC_Os06g48620 // LOC_Os02g35500 // LOC_Os12g16200 // LOC_Os01g12570
GO:0018130	P	heterocycle biosynthetic process	5	942	81	24460	0.21	0.42	// LOC_Os07g34570 // LOC_Os01g62900 // LOC_Os06g04150 // LOC_Os02g07230 // LOC_Os03g36540
GO:0000003	P	reproduction	7	942	125	24460	0.22	0.42	// LOC_Os04g46630 // LOC_Os04g42740 // LOC_Os04g34250 // LOC_Os01g66610 // LOC_Os04g54070 // LOC_Os04g56090 // LOC_Os02g42650
GO:0006091	P	generation of precursor metabolites and energy	15	942	308	24460	0.22	0.42	// LOC_Os02g51590 // LOC_Os06g22060 // LOC_Os08g15322 // LOC_Os02g48360 // LOC_Os01g51380 // LOC_Os03g52460 // LOC_Os01g44220 // LOC_Os08g34050 // LOC_Os10g26570 // LOC_Os01g53930 // LOC_Os10g21418 // LOC_Os05g49880 // LOC_Os06g05860 // LOC_Os03g56280 // LOC_Os06g39708
GO:0006979	P	response to oxidative stress	10	942	194	24460	0.23	0.43	// LOC_Os07g06175 // LOC_Os02g02400 // LOC_Os03g22010 // LOC_Os02g58720 // LOC_Os03g13200 // LOC_Os02g14440 // LOC_Os06g27850 // LOC_Os02g14460 // LOC_Os05g04500 // LOC_Os07g06380
GO:0006396	P	RNA processing	10	942	196	24460	0.24	0.44	// LOC_Os05g32220 // LOC_Os03g12910 // LOC_Os11g13420 // LOC_Os07g07310 // LOC_Os08g31460 // LOC_Os09g27270 // LOC_Os05g49130 // LOC_Os01g74190 // LOC_Os01g59510 // LOC_Os04g16734
GO:0019725	P	cellular homeostasis	7	942	129	24460	0.24	0.44	// LOC_Os01g68480 // LOC_Os08g44400 // LOC_Os12g18360 // LOC_Os01g73234 // LOC_Os06g21550 // LOC_Os04g57930 // LOC_Os04g42930
GO:0034470	P	ncRNA processing	5	942	88	24460	0.26	0.48	// LOC_Os05g49130 // LOC_Os01g74190 // LOC_Os03g12910 // LOC_Os08g31460 // LOC_Os09g27270
GO:0055085	P	transmembrane transport	11	942	227	24460	0.27	0.49	// LOC_Os12g32940 // LOC_Os03g42830 // LOC_Os01g49120 // LOC_Os01g51380 // LOC_Os10g20350 // LOC_Os10g20390 // LOC_Os11g41850 // LOC_Os04g38026 // LOC_Os03g10090 // LOC_Os04g38220 // LOC_Os03g37470
GO:0051704	P	multi-organism process	6	942	113	24460	0.28	0.5	// LOC_Os04g42740 // LOC_Os04g34250 // LOC_Os01g66610 // LOC_Os04g54070 // LOC_Os04g56090 // LOC_Os11g37970
GO:0042592	P	homeostatic process	7	942	136	24460	0.28	0.5	// LOC_Os01g68480 // LOC_Os08g44400 // LOC_Os12g18360 // LOC_Os01g73234 // LOC_Os06g21550 // LOC_Os04g57930 // LOC_Os04g42930
GO:0016567	P	protein ubiquitination	5	942	93	24460	0.3	0.53	// LOC_Os01g03290 // LOC_Os05g06100 // LOC_Os08g37570 // LOC_Os02g12670 // LOC_Os01g03300
GO:0070647	P	protein modification by small protein conjugation or removal	5	942	94	24460	0.31	0.53	// LOC_Os01g03290 // LOC_Os05g06100 // LOC_Os08g37570 // LOC_Os02g12670 // LOC_Os01g03300
GO:0032446	P	protein modification by small protein conjugation	5	942	94	24460	0.31	0.53	// LOC_Os01g03290 // LOC_Os05g06100 // LOC_Os08g37570 // LOC_Os02g12670 // LOC_Os01g03300
GO:0006457	P	protein folding	8	942	167	24460	0.32	0.55	// LOC_Os04g57880 // LOC_Os03g50080 // LOC_Os02g33149 // LOC_Os06g09679 // LOC_Os09g29840 // LOC_Os02g51570 // LOC_Os10g41710 // LOC_Os05g23740
GO:0009875	P	pollen-pistil interaction	5	942	99	24460	0.34	0.56	// LOC_Os04g56090 // LOC_Os01g66610 // LOC_Os04g54070 // LOC_Os04g42740 // LOC_Os04g34250
GO:0006812	P	cation transport	17	942	390	24460	0.34	0.56	// LOC_Os03g37840 // LOC_Os06g08080 // LOC_Os04g51610 // LOC_Os04g33900 // LOC_Os01g51380 // LOC_Os06g15910 // LOC_Os09g09830 // LOC_Os08g36340 // LOC_Os04g32820 // LOC_Os01g37690 // LOC_Os09g27580 // LOC_Os08g10550 // LOC_Os02g57350 // LOC_Os05g27100 // LOC_Os03g03590 // LOC_Os09g31130 // LOC_Os06g37010
GO:0008037	P	cell recognition	5	942	99	24460	0.34	0.56	// LOC_Os04g56090 // LOC_Os01g66610 // LOC_Os04g54070 // LOC_Os04g42740 // LOC_Os04g34250
GO:0048544	P	recognition of pollen	5	942	99	24460	0.34	0.56	// LOC_Os04g56090 // LOC_Os01g66610 // LOC_Os04g54070 // LOC_Os04g42740 // LOC_Os04g34250
GO:0009856	P	pollination	5	942	99	24460	0.34	0.56	// LOC_Os04g56090 // LOC_Os01g66610 // LOC_Os04g54070 // LOC_Os04g42740 // LOC_Os04g34250
GO:0050790	P	regulation of catalytic activity	5	942	106	24460	0.39	0.63	// LOC_Os03g40830 // LOC_Os01g52750 // LOC_Os04g03810 // LOC_Os01g64860 // LOC_Os04g03050
GO:0022414	P	reproductive process	5	942	106	24460	0.39	0.63	// LOC_Os04g56090 // LOC_Os01g66610 // LOC_Os04g54070 // LOC_Os04g42740 // LOC_Os04g34250
GO:0065009	P	regulation of molecular function	5	942	107	24460	0.4	0.64	// LOC_Os03g40830 // LOC_Os01g52750 // LOC_Os04g03810 // LOC_Os01g64860 // LOC_Os04g03050
GO:0034660	P	ncRNA metabolic process	8	942	186	24460	0.43	0.68	// LOC_Os01g03030 // LOC_Os03g12910 // LOC_Os10g38920 // LOC_Os08g31460 // LOC_Os09g27270 // LOC_Os07g47300 // LOC_Os05g49130 // LOC_Os01g74190
GO:0015672	P	monovalent inorganic cation transport	8	942	186	24460	0.43	0.68	// LOC_Os03g37840 // LOC_Os06g08080 // LOC_Os01g51380 // LOC_Os06g15910 // LOC_Os08g36340 // LOC_Os09g27580 // LOC_Os08g10550 // LOC_Os09g31130
GO:0006412	P	translation	26	942	683	24460	0.55	0.86	// LOC_Os02g57670 // LOC_Os03g34040 // LOC_Os04g38750 // LOC_Os01g69950 // LOC_Os12g35630 // LOC_Os03g12020 // LOC_Os01g16390 // LOC_Os11g02450 // LOC_Os02g51790 // LOC_Os02g43600 // LOC_Os06g46930 // LOC_Os06g39716 // LOC_Os10g21196 // LOC_Os03g55930 // LOC_Os03g45120 // LOC_Os03g44820 // LOC_Os05g32220 // LOC_Os01g59060 // LOC_Os01g03030 // LOC_Os03g24020 // LOC_Os10g38920 // LOC_Os08g17784 // …
GO:0007154	P	cell communication	6	942	164	24460	0.61	0.94	// LOC_Os04g42740 // LOC_Os04g34250 // LOC_Os01g66610 // LOC_Os04g54070 // LOC_Os04g56090 // LOC_Os08g35830
GO:0080090	P	regulation of primary metabolic process	53	942	1673	24460	0.94	1	// LOC_Os11g05740 // LOC_Os02g04640 // LOC_Os12g42400 // LOC_Os04g47890 // LOC_Os06g10880 // LOC_Os03g03000 // LOC_Os06g01934 // LOC_Os09g35030 // LOC_Os04g38770 // LOC_Os01g51260 // LOC_Os04g23440 // LOC_Os03g43810 // LOC_Os05g48850 // LOC_Os08g43600 // LOC_Os02g12790 // LOC_Os04g53460 // LOC_Os02g52450 // LOC_Os03g03260 // LOC_Os03g08754 // LOC_Os10g26460 // LOC_Os11g02540 // LOC_Os02g10760 // …
GO:0019222	P	regulation of metabolic process	53	942	1715	24460	0.96	1	// LOC_Os11g05740 // LOC_Os02g04640 // LOC_Os12g42400 // LOC_Os04g47890 // LOC_Os06g10880 // LOC_Os03g03000 // LOC_Os06g01934 // LOC_Os09g35030 // LOC_Os04g38770 // LOC_Os01g51260 // LOC_Os04g23440 // LOC_Os03g43810 // LOC_Os05g48850 // LOC_Os08g43600 // LOC_Os02g12790 // LOC_Os04g53460 // LOC_Os02g52450 // LOC_Os03g03260 // LOC_Os03g08754 // LOC_Os10g26460 // LOC_Os11g02540 // LOC_Os02g10760 // …
GO:0006260	P	DNA replication	10	942	2772	24460	1	1	// LOC_Os02g29630 // LOC_Os09g04400 // LOC_Os03g15620 // LOC_Os11g24150 // LOC_Os10g24310 // LOC_Os11g07790 // LOC_Os06g03250 // LOC_Os05g07340 // LOC_Os06g30110 // LOC_Os05g24520
GO:0060255	P	regulation of macromolecule metabolic process	53	942	1697	24460	0.95	1	// LOC_Os11g05740 // LOC_Os02g04640 // LOC_Os12g42400 // LOC_Os04g47890 // LOC_Os06g10880 // LOC_Os03g03000 // LOC_Os06g01934 // LOC_Os09g35030 // LOC_Os04g38770 // LOC_Os01g51260 // LOC_Os04g23440 // LOC_Os03g43810 // LOC_Os05g48850 // LOC_Os08g43600 // LOC_Os02g12790 // LOC_Os04g53460 // LOC_Os02g52450 // LOC_Os03g03260 // LOC_Os03g08754 // LOC_Os10g26460 // LOC_Os11g02540 // LOC_Os02g10760 // …
GO:0030163	P	protein catabolic process	5	942	172	24460	0.79	1	// LOC_Os05g06100 // LOC_Os01g03300 // LOC_Os12g13360 // LOC_Os01g03290 // LOC_Os01g61700
GO:0023052	P	signaling	13	942	495	24460	0.94	1	// LOC_Os04g42740 // LOC_Os04g34250 // LOC_Os12g05900 // LOC_Os01g66610 // LOC_Os04g59310 // LOC_Os04g54070 // LOC_Os03g20380 // LOC_Os04g56090 // LOC_Os01g16030 // LOC_Os05g06320 // LOC_Os09g25100 // LOC_Os04g35100 // LOC_Os08g35830
GO:0006278	P	RNA-dependent DNA replication	10	942	2703	24460	1	1	// LOC_Os02g29630 // LOC_Os09g04400 // LOC_Os03g15620 // LOC_Os11g24150 // LOC_Os10g24310 // LOC_Os11g07790 // LOC_Os06g03250 // LOC_Os05g07340 // LOC_Os06g30110 // LOC_Os05g24520
GO:0019538	P	protein metabolic process	138	942	6115	24460	1	1	// LOC_Os07g18230 // LOC_Os02g51790 // LOC_Os02g48900 // LOC_Os01g61700 // LOC_Os09g29840 // LOC_Os08g17784 // LOC_Os12g35630 // LOC_Os04g02970 // LOC_Os03g37120 // LOC_Os05g16430 // LOC_Os01g03290 // LOC_Os08g37570 // LOC_Os02g43870 // LOC_Os01g03300 // LOC_Os02g12670 // LOC_Os06g02380 // LOC_Os06g46930 // LOC_Os03g50080 // LOC_Os06g03080 // LOC_Os06g39716 // LOC_Os01g52750 // LOC_Os04g54070 // …
GO:0023060	P	signal transmission	7	942	318	24460	0.96	1	// LOC_Os12g05900 // LOC_Os04g59310 // LOC_Os03g20380 // LOC_Os01g16030 // LOC_Os05g06320 // LOC_Os09g25100 // LOC_Os04g35100
GO:0007165	P	signal transduction	7	942	268	24460	0.89	1	// LOC_Os12g05900 // LOC_Os04g59310 // LOC_Os03g20380 // LOC_Os01g16030 // LOC_Os05g06320 // LOC_Os09g25100 // LOC_Os04g35100
GO:0006807	P	nitrogen compound metabolic process	127	942	7115	24460	1	1	// LOC_Os04g47890 // LOC_Os04g56400 // LOC_Os06g22870 // LOC_Os04g51610 // LOC_Os03g02690 // LOC_Os04g23440 // LOC_Os01g36460 // LOC_Os05g48850 // LOC_Os01g51260 // LOC_Os07g49110 // LOC_Os01g62900 // LOC_Os03g03260 // LOC_Os03g08754 // LOC_Os10g26460 // LOC_Os11g22700 // LOC_Os03g18130 // LOC_Os05g46610 // LOC_Os04g53230 // LOC_Os02g07230 // LOC_Os02g49840 // LOC_Os01g51380 // LOC_Os07g07310 // …
GO:0043170	P	macromolecule metabolic process	236	942	10789	24460	1	1	// LOC_Os04g47890 // LOC_Os11g02300 // LOC_Os07g18230 // LOC_Os02g51790 // LOC_Os09g18594 // LOC_Os06g22870 // LOC_Os01g61700 // LOC_Os09g29840 // LOC_Os08g17784 // LOC_Os12g35630 // LOC_Os02g43330 // LOC_Os04g02970 // LOC_Os04g23440 // LOC_Os03g37120 // LOC_Os05g16430 // LOC_Os01g03290 // LOC_Os05g48850 // LOC_Os01g51260 // LOC_Os10g41710 // LOC_Os07g49110 // LOC_Os04g03050 // LOC_Os03g08754 // …
GO:0050789	P	regulation of biological process	75	942	2081	24460	0.74	1	// LOC_Os11g05740 // LOC_Os01g68480 // LOC_Os08g44400 // LOC_Os01g01660 // LOC_Os02g04640 // LOC_Os04g59310 // LOC_Os06g22870 // LOC_Os04g47890 // LOC_Os03g20380 // LOC_Os06g10880 // LOC_Os01g73234 // LOC_Os03g03000 // LOC_Os06g01934 // LOC_Os09g35030 // LOC_Os04g38770 // LOC_Os02g47610 // LOC_Os10g40130 // LOC_Os04g35100 // LOC_Os03g44540 // LOC_Os04g23440 // LOC_Os03g43810 // LOC_Os12g18360 // …
GO:0044267	P	cellular protein metabolic process	87	942	2983	24460	1	1	// LOC_Os07g18230 // LOC_Os09g29840 // LOC_Os04g38750 // LOC_Os12g35630 // LOC_Os03g37120 // LOC_Os05g16430 // LOC_Os08g37570 // LOC_Os02g43870 // LOC_Os01g03300 // LOC_Os02g12670 // LOC_Os06g02380 // LOC_Os06g46930 // LOC_Os03g50080 // LOC_Os06g39716 // LOC_Os04g54070 // LOC_Os03g45120 // LOC_Os05g38010 // LOC_Os03g16170 // LOC_Os04g57880 // LOC_Os07g06570 // LOC_Os03g28300 // LOC_Os08g17784 // …
GO:0044260	P	cellular macromolecule metabolic process	183	942	9405	24460	1	1	// LOC_Os04g47890 // LOC_Os11g02300 // LOC_Os07g18230 // LOC_Os06g22870 // LOC_Os09g29840 // LOC_Os08g17784 // LOC_Os12g35630 // LOC_Os02g43330 // LOC_Os04g23440 // LOC_Os03g37120 // LOC_Os05g16430 // LOC_Os05g48850 // LOC_Os01g51260 // LOC_Os07g49110 // LOC_Os03g03260 // LOC_Os03g08754 // LOC_Os11g22700 // LOC_Os03g44540 // LOC_Os05g46610 // LOC_Os02g12670 // LOC_Os06g02380 // LOC_Os06g46930 // …
GO:0046483	P	heterocycle metabolic process	9	942	349	24460	0.92	1	// LOC_Os02g07230 // LOC_Os01g51380 // LOC_Os01g62900 // LOC_Os06g48620 // LOC_Os03g36540 // LOC_Os07g34570 // LOC_Os04g51610 // LOC_Os06g04150 // LOC_Os01g54370
GO:0016043	P	cellular component organization	10	942	1226	24460	1	1	// LOC_Os04g45990 // LOC_Os06g03220 // LOC_Os04g43290 // LOC_Os11g07790 // LOC_Os06g03250 // LOC_Os01g53930 // LOC_Os10g40130 // LOC_Os05g02300 // LOC_Os08g17820 // LOC_Os03g02590
GO:0065007	P	biological regulation	80	942	2175	24460	0.68	1	// LOC_Os11g05740 // LOC_Os01g68480 // LOC_Os08g44400 // LOC_Os01g01660 // LOC_Os02g04640 // LOC_Os04g59310 // LOC_Os06g22870 // LOC_Os04g47890 // LOC_Os03g20380 // LOC_Os03g03000 // LOC_Os06g10880 // LOC_Os01g73234 // LOC_Os04g03050 // LOC_Os06g01934 // LOC_Os09g35030 // LOC_Os04g38770 // LOC_Os02g47610 // LOC_Os10g40130 // LOC_Os04g35100 // LOC_Os03g44540 // LOC_Os04g23440 // LOC_Os03g43810 // …
GO:0016265	P	death	9	942	487	24460	1	1	// LOC_Os12g18374 // LOC_Os06g06850 // LOC_Os05g31610 // LOC_Os12g18360 // LOC_Os02g10350 // LOC_Os12g25170 // LOC_Os01g16390 // LOC_Os08g09110 // LOC_Os11g13440
GO:0009889	P	regulation of biosynthetic process	52	942	1616	24460	0.92	1	// LOC_Os11g05740 // LOC_Os02g04640 // LOC_Os12g42400 // LOC_Os04g47890 // LOC_Os06g10880 // LOC_Os03g03000 // LOC_Os06g01934 // LOC_Os09g35030 // LOC_Os04g38770 // LOC_Os01g51260 // LOC_Os04g23440 // LOC_Os03g43810 // LOC_Os05g48850 // LOC_Os08g43600 // LOC_Os02g12790 // LOC_Os04g53460 // LOC_Os03g03260 // LOC_Os03g08754 // LOC_Os10g26460 // LOC_Os11g02540 // LOC_Os02g10760 // LOC_Os03g12940 // …
GO:0050794	P	regulation of cellular process	69	942	1983	24460	0.82	1	// LOC_Os11g05740 // LOC_Os01g68480 // LOC_Os08g44400 // LOC_Os02g04640 // LOC_Os04g59310 // LOC_Os06g22870 // LOC_Os04g47890 // LOC_Os03g20380 // LOC_Os06g10880 // LOC_Os01g73234 // LOC_Os03g03000 // LOC_Os06g01934 // LOC_Os09g35030 // LOC_Os04g38770 // LOC_Os10g40130 // LOC_Os04g35100 // LOC_Os03g44540 // LOC_Os04g23440 // LOC_Os03g43810 // LOC_Os12g18360 // LOC_Os05g48850 // LOC_Os08g43600 // …
GO:0006952	P	defense response	12	942	442	24460	0.92	1	// LOC_Os12g18374 // LOC_Os01g08510 // LOC_Os12g18360 // LOC_Os07g11410 // LOC_Os01g16390 // LOC_Os06g32600 // LOC_Os04g39150 // LOC_Os06g06850 // LOC_Os08g09110 // LOC_Os11g37970 // LOC_Os07g11330 // LOC_Os11g13440
GO:0012501	P	programmed cell death	8	942	475	24460	1	1	// LOC_Os12g18374 // LOC_Os06g06850 // LOC_Os05g31610 // LOC_Os12g18360 // LOC_Os12g25170 // LOC_Os01g16390 // LOC_Os08g09110 // LOC_Os11g13440
GO:0043412	P	macromolecule modification	53	942	2046	24460	1	1	// LOC_Os05g38010 // LOC_Os04g42740 // LOC_Os06g16960 // LOC_Os02g46750 // LOC_Os04g09770 // LOC_Os03g20380 // LOC_Os01g45380 // LOC_Os08g31460 // LOC_Os05g50560 // LOC_Os02g40240 // LOC_Os01g62760 // LOC_Os12g39630 // LOC_Os07g18230 // LOC_Os03g37120 // LOC_Os05g16430 // LOC_Os02g42620 // LOC_Os07g43560 // LOC_Os08g37570 // LOC_Os11g02300 // LOC_Os02g43870 // LOC_Os01g03300 // LOC_Os04g05580 // …
GO:0008152	P	metabolic process	509	942	14088	24460	0.99	1	// LOC_Os07g30160 // LOC_Os09g09230 // LOC_Os01g12570 // LOC_Os09g29840 // LOC_Os01g46260 // LOC_Os06g15170 // LOC_Os11g02450 // LOC_Os03g02690 // LOC_Os04g02970 // LOC_Os07g30620 // LOC_Os11g37970 // LOC_Os04g03050 // LOC_Os02g35500 // LOC_Os10g07616 // LOC_Os03g18130 // LOC_Os02g12670 // LOC_Os06g02380 // LOC_Os05g49060 // LOC_Os07g07310 // LOC_Os11g26920 // LOC_Os10g19960 // LOC_Os01g04920 // …
GO:0016070	P	RNA metabolic process	40	942	1180	24460	0.81	1	// LOC_Os11g05740 // LOC_Os12g42400 // LOC_Os08g31460 // LOC_Os06g10880 // LOC_Os06g01934 // LOC_Os09g35030 // LOC_Os04g38770 // LOC_Os10g38920 // LOC_Os08g43600 // LOC_Os02g12790 // LOC_Os03g08500 // LOC_Os03g03260 // LOC_Os03g08754 // LOC_Os02g10760 // LOC_Os03g44540 // LOC_Os01g48060 // LOC_Os07g41720 // LOC_Os04g16734 // LOC_Os02g49840 // LOC_Os06g05350 // LOC_Os07g07310 // LOC_Os09g27270 // …
GO:0050896	P	response to stimulus	36	942	1022	24460	0.73	1	// LOC_Os08g35830 // LOC_Os03g22010 // LOC_Os01g73250 // LOC_Os03g13200 // LOC_Os02g14440 // LOC_Os06g27850 // LOC_Os03g37470 // LOC_Os02g14460 // LOC_Os07g06380 // LOC_Os01g08130 // LOC_Os11g06720 // LOC_Os02g02400 // LOC_Os12g18360 // LOC_Os05g04500 // LOC_Os01g16390 // LOC_Os06g32600 // LOC_Os07g11330 // LOC_Os12g39630 // LOC_Os01g48060 // LOC_Os02g12670 // LOC_Os07g06175 // LOC_Os01g08510 // …
GO:0006950	P	response to stress	28	942	883	24460	0.87	1	// LOC_Os08g35830 // LOC_Os03g22010 // LOC_Os01g73250 // LOC_Os03g13200 // LOC_Os02g14440 // LOC_Os06g27850 // LOC_Os02g14460 // LOC_Os07g06380 // LOC_Os11g06720 // LOC_Os02g02400 // LOC_Os12g18360 // LOC_Os05g04500 // LOC_Os01g16390 // LOC_Os06g32600 // LOC_Os07g11330 // LOC_Os12g39630 // LOC_Os02g12670 // LOC_Os07g06175 // LOC_Os01g08510 // LOC_Os07g11410 // LOC_Os02g58720 // LOC_Os04g39150 // …
GO:0015074	P	DNA integration	12	942	3206	24460	1	1	// LOC_Os03g15620 // LOC_Os11g24150 // LOC_Os08g38930 // LOC_Os11g07790 // LOC_Os08g37740 // LOC_Os06g03250 // LOC_Os12g39190 // LOC_Os05g07340 // LOC_Os11g22700 // LOC_Os05g19250 // LOC_Os03g21419 // LOC_Os04g29800
GO:0010556	P	regulation of macromolecule biosynthetic process	52	942	1616	24460	0.92	1	// LOC_Os11g05740 // LOC_Os02g04640 // LOC_Os12g42400 // LOC_Os04g47890 // LOC_Os06g10880 // LOC_Os03g03000 // LOC_Os06g01934 // LOC_Os09g35030 // LOC_Os04g38770 // LOC_Os01g51260 // LOC_Os04g23440 // LOC_Os03g43810 // LOC_Os05g48850 // LOC_Os08g43600 // LOC_Os02g12790 // LOC_Os04g53460 // LOC_Os03g03260 // LOC_Os03g08754 // LOC_Os10g26460 // LOC_Os11g02540 // LOC_Os02g10760 // LOC_Os03g12940 // …
GO:0006350	P	transcription	50	942	1698	24460	0.98	1	// LOC_Os11g05740 // LOC_Os02g04640 // LOC_Os12g42400 // LOC_Os04g47890 // LOC_Os06g10880 // LOC_Os03g03000 // LOC_Os06g01934 // LOC_Os09g35030 // LOC_Os04g38770 // LOC_Os01g51260 // LOC_Os04g23440 // LOC_Os03g43810 // LOC_Os05g48850 // LOC_Os08g43600 // LOC_Os02g12790 // LOC_Os04g53460 // LOC_Os03g03260 // LOC_Os03g08754 // LOC_Os10g26460 // LOC_Os11g02540 // LOC_Os02g10760 // LOC_Os03g12940 // …
GO:0006351	P	transcription, DNA-dependent	26	942	855	24460	0.91	1	// LOC_Os11g05740 // LOC_Os12g42400 // LOC_Os06g10880 // LOC_Os06g01934 // LOC_Os09g35030 // LOC_Os04g38770 // LOC_Os08g43600 // LOC_Os02g12790 // LOC_Os04g53460 // LOC_Os03g03260 // LOC_Os03g08754 // LOC_Os02g10760 // LOC_Os03g44540 // LOC_Os01g48060 // LOC_Os07g41720 // LOC_Os02g49840 // LOC_Os05g44400 // LOC_Os03g08500 // LOC_Os07g08140 // LOC_Os06g05350 // LOC_Os01g68020 // LOC_Os07g41370 // …
GO:0032774	P	RNA biosynthetic process	26	942	857	24460	0.91	1	// LOC_Os11g05740 // LOC_Os12g42400 // LOC_Os06g10880 // LOC_Os06g01934 // LOC_Os09g35030 // LOC_Os04g38770 // LOC_Os08g43600 // LOC_Os02g12790 // LOC_Os04g53460 // LOC_Os03g03260 // LOC_Os03g08754 // LOC_Os02g10760 // LOC_Os03g44540 // LOC_Os01g48060 // LOC_Os07g41720 // LOC_Os02g49840 // LOC_Os05g44400 // LOC_Os03g08500 // LOC_Os07g08140 // LOC_Os06g05350 // LOC_Os01g68020 // LOC_Os07g41370 // …
GO:0016310	P	phosphorylation	42	942	1761	24460	1	1	// LOC_Os04g42740 // LOC_Os06g16960 // LOC_Os02g46750 // LOC_Os04g09770 // LOC_Os03g20380 // LOC_Os01g45380 // LOC_Os05g50560 // LOC_Os02g40240 // LOC_Os05g40180 // LOC_Os12g39630 // LOC_Os07g18230 // LOC_Os03g37120 // LOC_Os05g16430 // LOC_Os02g42620 // LOC_Os07g43560 // LOC_Os11g02300 // LOC_Os02g43870 // LOC_Os04g05580 // LOC_Os05g06320 // LOC_Os09g25100 // LOC_Os02g12670 // LOC_Os11g07225 // …
GO:0044249	P	cellular biosynthetic process	131	942	5899	24460	1	1	// LOC_Os04g47890 // LOC_Os04g56400 // LOC_Os06g22870 // LOC_Os01g12570 // LOC_Os12g34890 // LOC_Os02g57250 // LOC_Os08g17784 // LOC_Os06g15170 // LOC_Os12g35630 // LOC_Os04g51610 // LOC_Os03g02690 // LOC_Os04g23440 // LOC_Os01g36460 // LOC_Os05g48850 // LOC_Os07g49110 // LOC_Os01g62900 // LOC_Os03g03260 // LOC_Os03g08754 // LOC_Os10g26460 // LOC_Os03g15050 // LOC_Os05g46610 // LOC_Os06g46930 // …
GO:0034645	P	cellular macromolecule biosynthetic process	93	942	5248	24460	1	1	// LOC_Os04g47890 // LOC_Os06g22870 // LOC_Os04g38750 // LOC_Os12g35630 // LOC_Os04g23440 // LOC_Os01g36460 // LOC_Os05g48850 // LOC_Os07g49110 // LOC_Os03g03260 // LOC_Os03g08754 // LOC_Os03g44540 // LOC_Os05g46610 // LOC_Os06g46930 // LOC_Os02g49840 // LOC_Os06g39716 // LOC_Os03g45120 // LOC_Os01g59060 // LOC_Os08g17784 // LOC_Os03g48970 // LOC_Os12g10630 // LOC_Os02g57670 // LOC_Os06g10880 // …
GO:0006139	P	nucleobase, nucleoside, nucleotide and nucleic acid metabolic process	91	942	6727	24460	1	1	// LOC_Os04g47890 // LOC_Os06g22870 // LOC_Os04g51610 // LOC_Os04g23440 // LOC_Os01g36460 // LOC_Os05g48850 // LOC_Os01g51260 // LOC_Os03g08500 // LOC_Os03g03260 // LOC_Os02g35500 // LOC_Os11g22700 // LOC_Os03g44540 // LOC_Os05g46610 // LOC_Os02g49840 // LOC_Os01g51380 // LOC_Os07g07310 // LOC_Os09g27270 // LOC_Os03g12910 // LOC_Os03g48970 // LOC_Os12g10630 // LOC_Os08g35830 // LOC_Os06g10880 // …
GO:0043687	P	post-translational protein modification	48	942	1818	24460	1	1	// LOC_Os04g42740 // LOC_Os06g16960 // LOC_Os02g46750 // LOC_Os04g09770 // LOC_Os03g20380 // LOC_Os01g45380 // LOC_Os05g50560 // LOC_Os02g40240 // LOC_Os01g62760 // LOC_Os12g39630 // LOC_Os07g18230 // LOC_Os03g37120 // LOC_Os05g16430 // LOC_Os02g42620 // LOC_Os07g43560 // LOC_Os08g37570 // LOC_Os11g02300 // LOC_Os02g43870 // LOC_Os01g03300 // LOC_Os04g05580 // LOC_Os05g06320 // LOC_Os09g25100 // …
GO:0009987	P	cellular process	317	942	12363	24460	1	1	// LOC_Os12g32940 // LOC_Os04g47890 // LOC_Os11g02300 // LOC_Os07g18230 // LOC_Os09g25150 // LOC_Os02g51790 // LOC_Os02g19924 // LOC_Os06g22870 // LOC_Os03g12990 // LOC_Os01g12570 // LOC_Os03g60509 // LOC_Os09g29840 // LOC_Os04g43290 // LOC_Os02g57250 // LOC_Os08g17784 // LOC_Os01g73234 // LOC_Os03g10090 // LOC_Os06g15170 // LOC_Os12g35630 // LOC_Os04g51610 // LOC_Os03g02690 // LOC_Os12g40630 // …
GO:0023046	P	signaling process	7	942	318	24460	0.96	1	// LOC_Os12g05900 // LOC_Os04g59310 // LOC_Os03g20380 // LOC_Os01g16030 // LOC_Os05g06320 // LOC_Os09g25100 // LOC_Os04g35100
GO:0006508	P	proteolysis	54	942	3247	24460	1	1	// LOC_Os01g62500 // LOC_Os01g04710 // LOC_Os09g05070 // LOC_Os05g05480 // LOC_Os02g16709 // LOC_Os02g48900 // LOC_Os01g03290 // LOC_Os06g03250 // LOC_Os07g29850 // LOC_Os04g01710 // LOC_Os01g64860 // LOC_Os03g27190 // LOC_Os08g44270 // LOC_Os05g51450 // LOC_Os07g38110 // LOC_Os06g08720 // LOC_Os04g02970 // LOC_Os09g04400 // LOC_Os03g52070 // LOC_Os10g24310 // LOC_Os11g27264 // LOC_Os04g03050 // …
GO:0055086	P	nucleobase, nucleoside and nucleotide metabolic process	7	942	275	24460	0.9	1	// LOC_Os04g51610 // LOC_Os05g06920 // LOC_Os06g46372 // LOC_Os02g35500 // LOC_Os01g51380 // LOC_Os01g12940 // LOC_Os01g54370
GO:0051252	P	regulation of RNA metabolic process	27	942	809	24460	0.8	1	// LOC_Os11g05740 // LOC_Os12g42400 // LOC_Os06g10880 // LOC_Os06g01934 // LOC_Os09g35030 // LOC_Os04g38770 // LOC_Os08g43600 // LOC_Os02g12790 // LOC_Os04g53460 // LOC_Os03g03260 // LOC_Os03g08754 // LOC_Os02g10760 // LOC_Os03g44540 // LOC_Os01g48060 // LOC_Os07g41720 // LOC_Os02g49840 // LOC_Os05g44400 // LOC_Os03g08500 // LOC_Os07g08140 // LOC_Os06g05350 // LOC_Os01g68020 // LOC_Os07g41370 // …
GO:0031326	P	regulation of cellular biosynthetic process	52	942	1616	24460	0.92	1	// LOC_Os11g05740 // LOC_Os02g04640 // LOC_Os12g42400 // LOC_Os04g47890 // LOC_Os06g10880 // LOC_Os03g03000 // LOC_Os06g01934 // LOC_Os09g35030 // LOC_Os04g38770 // LOC_Os01g51260 // LOC_Os04g23440 // LOC_Os03g43810 // LOC_Os05g48850 // LOC_Os08g43600 // LOC_Os02g12790 // LOC_Os04g53460 // LOC_Os03g03260 // LOC_Os03g08754 // LOC_Os10g26460 // LOC_Os11g02540 // LOC_Os02g10760 // LOC_Os03g12940 // …
GO:0031323	P	regulation of cellular metabolic process	53	942	1639	24460	0.92	1	// LOC_Os11g05740 // LOC_Os02g04640 // LOC_Os12g42400 // LOC_Os04g47890 // LOC_Os06g10880 // LOC_Os03g03000 // LOC_Os06g01934 // LOC_Os09g35030 // LOC_Os04g38770 // LOC_Os01g51260 // LOC_Os04g23440 // LOC_Os03g43810 // LOC_Os05g48850 // LOC_Os08g43600 // LOC_Os02g12790 // LOC_Os04g53460 // LOC_Os02g52450 // LOC_Os03g03260 // LOC_Os03g08754 // LOC_Os10g26460 // LOC_Os11g02540 // LOC_Os02g10760 // …
GO:0045449	P	regulation of transcription	50	942	1576	24460	0.93	1	// LOC_Os11g05740 // LOC_Os02g04640 // LOC_Os12g42400 // LOC_Os04g47890 // LOC_Os06g10880 // LOC_Os03g03000 // LOC_Os06g01934 // LOC_Os09g35030 // LOC_Os04g38770 // LOC_Os01g51260 // LOC_Os04g23440 // LOC_Os03g43810 // LOC_Os05g48850 // LOC_Os08g43600 // LOC_Os02g12790 // LOC_Os04g53460 // LOC_Os03g03260 // LOC_Os03g08754 // LOC_Os10g26460 // LOC_Os11g02540 // LOC_Os02g10760 // LOC_Os03g12940 // …
GO:0008219	P	cell death	9	942	487	24460	1	1	// LOC_Os12g18374 // LOC_Os06g06850 // LOC_Os05g31610 // LOC_Os12g18360 // LOC_Os02g10350 // LOC_Os12g25170 // LOC_Os01g16390 // LOC_Os08g09110 // LOC_Os11g13440
GO:0006355	P	regulation of transcription, DNA-dependent	26	942	806	24460	0.84	1	// LOC_Os11g05740 // LOC_Os12g42400 // LOC_Os06g10880 // LOC_Os06g01934 // LOC_Os09g35030 // LOC_Os04g38770 // LOC_Os08g43600 // LOC_Os02g12790 // LOC_Os04g53460 // LOC_Os03g03260 // LOC_Os03g08754 // LOC_Os02g10760 // LOC_Os03g44540 // LOC_Os01g48060 // LOC_Os07g41720 // LOC_Os02g49840 // LOC_Os05g44400 // LOC_Os03g08500 // LOC_Os07g08140 // LOC_Os06g05350 // LOC_Os01g68020 // LOC_Os07g41370 // …
GO:0010467	P	gene expression	85	942	2581	24460	0.94	1	// LOC_Os02g57670 // LOC_Os11g05740 // LOC_Os05g46610 // LOC_Os02g43600 // LOC_Os02g43330 // LOC_Os02g04640 // LOC_Os06g22870 // LOC_Os03g34040 // LOC_Os04g47890 // LOC_Os08g31460 // LOC_Os06g10880 // LOC_Os01g68020 // LOC_Os03g03000 // LOC_Os01g69950 // LOC_Os06g01934 // LOC_Os09g35030 // LOC_Os04g38770 // LOC_Os12g35630 // LOC_Os10g38920 // LOC_Os04g16734 // LOC_Os03g12020 // LOC_Os04g23440 // …
GO:0010468	P	regulation of gene expression	52	942	1638	24460	0.93	1	// LOC_Os11g05740 // LOC_Os02g04640 // LOC_Os12g42400 // LOC_Os04g47890 // LOC_Os06g10880 // LOC_Os03g03000 // LOC_Os06g01934 // LOC_Os09g35030 // LOC_Os04g38770 // LOC_Os01g51260 // LOC_Os04g23440 // LOC_Os03g43810 // LOC_Os05g48850 // LOC_Os08g43600 // LOC_Os02g12790 // LOC_Os04g53460 // LOC_Os03g03260 // LOC_Os03g08754 // LOC_Os10g26460 // LOC_Os11g02540 // LOC_Os02g10760 // LOC_Os03g12940 // …
GO:0006468	P	protein amino acid phosphorylation	40	942	1584	24460	1	1	// LOC_Os04g42740 // LOC_Os06g16960 // LOC_Os02g46750 // LOC_Os04g09770 // LOC_Os03g20380 // LOC_Os01g45380 // LOC_Os05g50560 // LOC_Os02g40240 // LOC_Os05g40180 // LOC_Os12g39630 // LOC_Os07g18230 // LOC_Os03g37120 // LOC_Os05g16430 // LOC_Os02g42620 // LOC_Os07g43560 // LOC_Os11g02300 // LOC_Os02g43870 // LOC_Os04g05580 // LOC_Os05g06320 // LOC_Os09g25100 // LOC_Os02g12670 // LOC_Os11g07225 // …
GO:0019219	P	regulation of nucleobase, nucleoside, nucleotide and nucleic acid metabolic process	51	942	1582	24460	0.92	1	// LOC_Os11g05740 // LOC_Os02g04640 // LOC_Os12g42400 // LOC_Os04g47890 // LOC_Os06g10880 // LOC_Os03g03000 // LOC_Os06g01934 // LOC_Os09g35030 // LOC_Os04g38770 // LOC_Os01g51260 // LOC_Os04g23440 // LOC_Os03g43810 // LOC_Os05g48850 // LOC_Os08g43600 // LOC_Os02g12790 // LOC_Os04g53460 // LOC_Os02g52450 // LOC_Os03g03260 // LOC_Os03g08754 // LOC_Os10g26460 // LOC_Os11g02540 // LOC_Os02g10760 // …
GO:0006464	P	protein modification process	51	942	1997	24460	1	1	// LOC_Os04g42740 // LOC_Os06g16960 // LOC_Os02g46750 // LOC_Os04g09770 // LOC_Os03g20380 // LOC_Os01g45380 // LOC_Os05g50560 // LOC_Os02g40240 // LOC_Os01g62760 // LOC_Os12g39630 // LOC_Os07g18230 // LOC_Os03g37120 // LOC_Os05g16430 // LOC_Os02g42620 // LOC_Os07g43560 // LOC_Os08g37570 // LOC_Os11g02300 // LOC_Os02g43870 // LOC_Os01g03300 // LOC_Os04g05580 // LOC_Os03g12940 // LOC_Os05g06320 // …
GO:0009058	P	biosynthetic process	154	942	6082	24460	1	1	// LOC_Os04g47890 // LOC_Os04g56400 // LOC_Os06g22870 // LOC_Os01g12570 // LOC_Os03g60509 // LOC_Os08g17784 // LOC_Os06g15170 // LOC_Os12g35630 // LOC_Os04g51610 // LOC_Os03g02690 // LOC_Os04g23440 // LOC_Os05g48850 // LOC_Os02g19924 // LOC_Os07g49110 // LOC_Os01g62900 // LOC_Os03g03260 // LOC_Os03g08754 // LOC_Os10g26460 // LOC_Os10g07616 // LOC_Os03g15050 // LOC_Os05g46610 // LOC_Os06g46930 // …
GO:0009059	P	macromolecule biosynthetic process	93	942	5252	24460	1	1	// LOC_Os04g47890 // LOC_Os06g22870 // LOC_Os04g38750 // LOC_Os12g35630 // LOC_Os04g23440 // LOC_Os01g36460 // LOC_Os05g48850 // LOC_Os07g49110 // LOC_Os03g03260 // LOC_Os03g08754 // LOC_Os03g44540 // LOC_Os05g46610 // LOC_Os06g46930 // LOC_Os02g49840 // LOC_Os06g39716 // LOC_Os03g45120 // LOC_Os01g59060 // LOC_Os08g17784 // LOC_Os03g48970 // LOC_Os12g10630 // LOC_Os02g57670 // LOC_Os06g10880 // …
GO:0009117	P	nucleotide metabolic process	5	942	247	24460	0.96	1	// LOC_Os06g46372 // LOC_Os01g51380 // LOC_Os04g51610 // LOC_Os05g06920 // LOC_Os02g35500
GO:0051171	P	regulation of nitrogen compound metabolic process	51	942	1582	24460	0.92	1	// LOC_Os11g05740 // LOC_Os02g04640 // LOC_Os12g42400 // LOC_Os04g47890 // LOC_Os06g10880 // LOC_Os03g03000 // LOC_Os06g01934 // LOC_Os09g35030 // LOC_Os04g38770 // LOC_Os01g51260 // LOC_Os04g23440 // LOC_Os03g43810 // LOC_Os05g48850 // LOC_Os08g43600 // LOC_Os02g12790 // LOC_Os04g53460 // LOC_Os02g52450 // LOC_Os03g03260 // LOC_Os03g08754 // LOC_Os10g26460 // LOC_Os11g02540 // LOC_Os02g10760 // …
GO:0006996	P	organelle organization	8	942	1101	24460	1	1	// LOC_Os04g45990 // LOC_Os04g43290 // LOC_Os11g07790 // LOC_Os06g03250 // LOC_Os06g03220 // LOC_Os05g02300 // LOC_Os08g17820 // LOC_Os03g02590
GO:0044238	P	primary metabolic process	357	942	12303	24460	1	1	// LOC_Os01g12570 // LOC_Os09g29840 // LOC_Os01g46260 // LOC_Os06g15170 // LOC_Os11g02450 // LOC_Os03g02690 // LOC_Os04g02970 // LOC_Os11g37970 // LOC_Os04g03050 // LOC_Os02g35500 // LOC_Os11g22700 // LOC_Os03g18130 // LOC_Os02g12670 // LOC_Os06g02380 // LOC_Os06g46930 // LOC_Os07g07310 // LOC_Os10g19960 // LOC_Os03g12910 // LOC_Os03g48970 // LOC_Os01g15000 // LOC_Os02g16709 // LOC_Os04g41620 // …
GO:0006753	P	nucleoside phosphate metabolic process	5	942	247	24460	0.96	1	// LOC_Os06g46372 // LOC_Os01g51380 // LOC_Os04g51610 // LOC_Os05g06920 // LOC_Os02g35500
GO:0006915	P	apoptosis	8	942	475	24460	1	1	// LOC_Os12g18374 // LOC_Os06g06850 // LOC_Os05g31610 // LOC_Os12g18360 // LOC_Os12g25170 // LOC_Os01g16390 // LOC_Os08g09110 // LOC_Os11g13440
GO:0044237	P	cellular metabolic process	272	942	10813	24460	1	1	// LOC_Os04g47890 // LOC_Os11g02300 // LOC_Os07g18230 // LOC_Os09g25150 // LOC_Os02g51790 // LOC_Os02g19924 // LOC_Os06g22870 // LOC_Os01g12570 // LOC_Os03g60509 // LOC_Os09g29840 // LOC_Os02g57250 // LOC_Os08g17784 // LOC_Os06g15170 // LOC_Os12g35630 // LOC_Os04g51610 // LOC_Os03g02690 // LOC_Os12g40630 // LOC_Os04g23440 // LOC_Os03g37120 // LOC_Os05g16430 // LOC_Os11g41650 // LOC_Os05g19250 // …
GO:0006399	P	tRNA metabolic process	5	942	154	24460	0.71	1	// LOC_Os01g03030 // LOC_Os07g47300 // LOC_Os03g12910 // LOC_Os08g31460 // LOC_Os10g38920
GO:0006796	P	phosphate metabolic process	47	942	1879	24460	1	1	// LOC_Os04g42740 // LOC_Os06g16960 // LOC_Os02g46750 // LOC_Os04g09770 // LOC_Os03g20380 // LOC_Os01g45380 // LOC_Os05g50560 // LOC_Os02g40240 // LOC_Os01g62760 // LOC_Os12g39630 // LOC_Os07g18230 // LOC_Os03g37120 // LOC_Os05g16430 // LOC_Os02g42620 // LOC_Os07g43560 // LOC_Os11g02300 // LOC_Os02g43870 // LOC_Os04g05580 // LOC_Os05g06320 // LOC_Os09g25100 // LOC_Os02g12670 // LOC_Os01g68940 // …
GO:0044085	P	cellular component biogenesis	9	942	262	24460	0.68	1	// LOC_Os03g17580 // LOC_Os04g43290 // LOC_Os05g02300 // LOC_Os07g49110 // LOC_Os01g53930 // LOC_Os05g49130 // LOC_Os10g40130 // LOC_Os01g74190 // LOC_Os09g27270
GO:0006793	P	phosphorus metabolic process	47	942	1879	24460	1	1	// LOC_Os04g42740 // LOC_Os06g16960 // LOC_Os02g46750 // LOC_Os04g09770 // LOC_Os03g20380 // LOC_Os01g45380 // LOC_Os05g50560 // LOC_Os02g40240 // LOC_Os01g62760 // LOC_Os12g39630 // LOC_Os07g18230 // LOC_Os03g37120 // LOC_Os05g16430 // LOC_Os02g42620 // LOC_Os07g43560 // LOC_Os11g02300 // LOC_Os02g43870 // LOC_Os04g05580 // LOC_Os05g06320 // LOC_Os09g25100 // LOC_Os02g12670 // LOC_Os01g68940 // …
GO:0006259	P	DNA metabolic process	19	942	4448	24460	1	1	// LOC_Os08g38930 // LOC_Os09g04400 // LOC_Os02g29630 // LOC_Os03g15620 // LOC_Os11g24150 // LOC_Os10g24310 // LOC_Os11g07790 // LOC_Os08g37740 // LOC_Os06g03250 // LOC_Os12g39190 // LOC_Os03g21419 // LOC_Os05g07340 // LOC_Os11g22700 // LOC_Os05g19250 // LOC_Os06g30110 // LOC_Os05g24520 // LOC_Os02g43330 // LOC_Os04g29800 // LOC_Os08g35830
GO:0016491	F	oxidoreductase activity	143	942	1995	24460	2.4e-12	3.7e-10	// LOC_Os02g09940 // LOC_Os10g34480 // LOC_Os01g72730 // LOC_Os01g09430 // LOC_Os01g07910 // LOC_Os01g73234 // LOC_Os03g02690 // LOC_Os03g40020 // LOC_Os03g39650 // LOC_Os12g12590 // LOC_Os09g08920 // LOC_Os10g28320 // LOC_Os10g21050 // LOC_Os11g27730 // LOC_Os01g62900 // LOC_Os10g05490 // LOC_Os03g32470 // LOC_Os07g05400 // LOC_Os01g12740 // LOC_Os04g16732 // LOC_Os02g29960 // LOC_Os04g26870 // …
GO:0048037	F	cofactor binding	57	942	547	24460	1.2e-10	9.3e-09	// LOC_Os01g16714 // LOC_Os09g25150 // LOC_Os07g11110 // LOC_Os02g35500 // LOC_Os07g31380 // LOC_Os03g21960 // LOC_Os07g40690 // LOC_Os04g53810 // LOC_Os06g41810 // LOC_Os07g01760 // LOC_Os03g57220 // LOC_Os07g18154 // LOC_Os04g20164 // LOC_Os06g01850 // LOC_Os09g31514 // LOC_Os08g31030 // LOC_Os07g41050 // LOC_Os08g34720 // LOC_Os02g19924 // LOC_Os06g40940 // LOC_Os04g53800 // LOC_Os06g47000 // …
GO:0009055	F	electron carrier activity	76	942	919	24460	2.2e-09	1.1e-07	// LOC_Os10g34480 // LOC_Os06g27850 // LOC_Os03g22010 // LOC_Os02g36150 // LOC_Os08g01490 // LOC_Os03g13200 // LOC_Os01g72730 // LOC_Os01g09430 // LOC_Os07g18158 // LOC_Os01g07910 // LOC_Os02g14440 // LOC_Os01g73234 // LOC_Os02g09390 // LOC_Os08g44400 // LOC_Os10g36848 // LOC_Os02g14460 // LOC_Os03g08570 // LOC_Os07g18154 // LOC_Os06g01850 // LOC_Os10g26400 // LOC_Os01g36350 // LOC_Os03g39650 // …
GO:0004497	F	monooxygenase activity	41	942	423	24460	3e-07	9e-06	// LOC_Os01g16714 // LOC_Os10g34480 // LOC_Os08g01490 // LOC_Os02g09390 // LOC_Os01g72730 // LOC_Os05g29750 // LOC_Os01g36350 // LOC_Os03g39650 // LOC_Os09g08920 // LOC_Os10g16974 // LOC_Os10g21050 // LOC_Os11g27730 // LOC_Os10g08474 // LOC_Os10g05490 // LOC_Os10g23180 // LOC_Os10g08319 // LOC_Os01g36294 // LOC_Os02g29960 // LOC_Os02g37010 // LOC_Os01g12740 // LOC_Os01g72740 // LOC_Os06g01250 // …
GO:0004553	F	hydrolase activity, hydrolyzing O-glycosyl compounds	43	942	454	24460	2.8e-07	9e-06	// LOC_Os03g14010 // LOC_Os01g71474 // LOC_Os01g59819 // LOC_Os04g41620 // LOC_Os06g24990 // LOC_Os09g31430 // LOC_Os01g70520 // LOC_Os06g50140 // LOC_Os04g41640 // LOC_Os01g71670 // LOC_Os05g23924 // LOC_Os04g41680 // LOC_Os06g51060 // LOC_Os02g12730 // LOC_Os01g71380 // LOC_Os02g50040 // LOC_Os07g46280 // LOC_Os11g19210 // LOC_Os03g59330 // LOC_Os05g30300 // LOC_Os05g34320 // LOC_Os10g35110 // …
GO:0050662	F	coenzyme binding	38	942	380	24460	4e-07	1e-05	// LOC_Os01g16714 // LOC_Os09g25150 // LOC_Os07g11110 // LOC_Os02g35500 // LOC_Os07g31380 // LOC_Os07g40690 // LOC_Os06g41810 // LOC_Os04g53810 // LOC_Os07g18154 // LOC_Os06g01850 // LOC_Os09g31514 // LOC_Os08g31030 // LOC_Os07g41050 // LOC_Os08g34720 // LOC_Os04g53800 // LOC_Os06g47000 // LOC_Os02g01150 // LOC_Os12g23180 // LOC_Os07g05400 // LOC_Os04g16732 // LOC_Os02g07490 // LOC_Os02g37010 // …
GO:0016798	F	hydrolase activity, acting on glycosyl bonds	44	942	503	24460	1.5e-06	3.1e-05	// LOC_Os03g14010 // LOC_Os01g71474 // LOC_Os01g59819 // LOC_Os04g41620 // LOC_Os06g24990 // LOC_Os09g31430 // LOC_Os01g70520 // LOC_Os06g50140 // LOC_Os04g41640 // LOC_Os01g71670 // LOC_Os05g23924 // LOC_Os04g41680 // LOC_Os06g51060 // LOC_Os02g12730 // LOC_Os01g71380 // LOC_Os02g50040 // LOC_Os07g46280 // LOC_Os11g19210 // LOC_Os03g59330 // LOC_Os05g30300 // LOC_Os05g34320 // LOC_Os10g35110 // …
GO:0016829	F	lyase activity	30	942	286	24460	2.7e-06	5.1e-05	// LOC_Os02g36220 // LOC_Os08g09250 // LOC_Os06g04070 // LOC_Os12g19381 // LOC_Os02g17920 // LOC_Os04g27790 // LOC_Os02g19924 // LOC_Os03g22634 // LOC_Os07g42250 // LOC_Os01g58020 // LOC_Os03g15050 // LOC_Os04g08350 // LOC_Os01g45274 // LOC_Os09g20810 // LOC_Os01g52010 // LOC_Os11g04660 // LOC_Os04g01810 // LOC_Os12g17600 // LOC_Os08g04500 // LOC_Os09g28050 // LOC_Os01g51980 // LOC_Os08g07080 // …
GO:0046906	F	tetrapyrrole binding	50	942	629	24460	3.7e-06	6.1e-05	// LOC_Os10g34480 // LOC_Os06g39708 // LOC_Os03g22010 // LOC_Os08g01490 // LOC_Os03g13200 // LOC_Os01g72730 // LOC_Os02g14440 // LOC_Os02g09390 // LOC_Os06g27850 // LOC_Os02g14460 // LOC_Os07g06380 // LOC_Os01g36350 // LOC_Os03g39650 // LOC_Os09g08920 // LOC_Os10g16974 // LOC_Os10g21050 // LOC_Os11g27730 // LOC_Os10g08319 // LOC_Os10g05490 // LOC_Os10g23180 // LOC_Os10g08474 // LOC_Os07g33480 // …
GO:0008171	F	O-methyltransferase activity	12	942	54	24460	4.9e-06	7.4e-05	// LOC_Os05g43940 // LOC_Os11g19840 // LOC_Os06g16960 // LOC_Os05g43930 // LOC_Os11g19880 // LOC_Os12g25490 // LOC_Os10g02880 // LOC_Os12g25450 // LOC_Os04g11970 // LOC_Os11g20160 // LOC_Os06g04150 // LOC_Os12g13800
GO:0020037	F	heme binding	49	942	622	24460	5.8e-06	7.8e-05	// LOC_Os10g34480 // LOC_Os01g72730 // LOC_Os03g22010 // LOC_Os08g01490 // LOC_Os03g13200 // LOC_Os02g14440 // LOC_Os02g09390 // LOC_Os06g27850 // LOC_Os02g14460 // LOC_Os07g06380 // LOC_Os01g36350 // LOC_Os03g39650 // LOC_Os09g08920 // LOC_Os10g16974 // LOC_Os10g21050 // LOC_Os11g27730 // LOC_Os10g08319 // LOC_Os10g05490 // LOC_Os10g23180 // LOC_Os10g08474 // LOC_Os07g33480 // LOC_Os01g36294 // …
GO:0003824	F	catalytic activity	586	942	13462	24460	7.2e-06	9e-05	// LOC_Os10g34480 // LOC_Os05g43930 // LOC_Os07g30160 // LOC_Os09g09230 // LOC_Os01g12570 // LOC_Os01g09430 // LOC_Os01g46260 // LOC_Os06g15170 // LOC_Os03g02690 // LOC_Os04g02970 // LOC_Os03g39650 // LOC_Os07g30620 // LOC_Os02g43870 // LOC_Os10g05490 // LOC_Os11g19880 // LOC_Os10g07616 // LOC_Os03g18130 // LOC_Os02g12670 // LOC_Os01g01302 // LOC_Os06g04070 // LOC_Os07g07310 // LOC_Os09g16380 // …
GO:0008168	F	methyltransferase activity	26	942	257	24460	2.2e-05	0.00025	// LOC_Os06g16960 // LOC_Os05g43930 // LOC_Os06g21020 // LOC_Os01g12570 // LOC_Os12g25490 // LOC_Os11g20160 // LOC_Os06g04150 // LOC_Os05g41800 // LOC_Os04g45990 // LOC_Os11g19880 // LOC_Os06g13350 // LOC_Os12g25450 // LOC_Os10g02880 // LOC_Os05g43940 // LOC_Os05g01140 // LOC_Os02g43194 // LOC_Os01g12560 // LOC_Os03g12110 // LOC_Os09g27270 // LOC_Os04g11970 // LOC_Os01g74190 // LOC_Os02g47310 // …
GO:0016741	F	transferase activity, transferring one-carbon groups	26	942	262	24460	3e-05	0.00032	// LOC_Os06g16960 // LOC_Os05g43930 // LOC_Os06g21020 // LOC_Os01g12570 // LOC_Os12g25490 // LOC_Os11g20160 // LOC_Os06g04150 // LOC_Os05g41800 // LOC_Os04g45990 // LOC_Os11g19880 // LOC_Os06g13350 // LOC_Os12g25450 // LOC_Os10g02880 // LOC_Os05g43940 // LOC_Os05g01140 // LOC_Os02g43194 // LOC_Os01g12560 // LOC_Os03g12110 // LOC_Os09g27270 // LOC_Os04g11970 // LOC_Os01g74190 // LOC_Os02g47310 // …
GO:0016846	F	carbon-sulfur lyase activity	8	942	27	24460	3.4e-05	0.00034	// LOC_Os09g28050 // LOC_Os02g17920 // LOC_Os01g51980 // LOC_Os02g19924 // LOC_Os01g52010 // LOC_Os02g19970 // LOC_Os08g09250 // LOC_Os07g01760
GO:0005506	F	iron ion binding	52	942	733	24460	4.3e-05	0.0004	// LOC_Os10g34480 // LOC_Os01g72730 // LOC_Os03g22010 // LOC_Os02g36150 // LOC_Os08g01490 // LOC_Os03g13200 // LOC_Os02g14440 // LOC_Os02g09390 // LOC_Os06g27850 // LOC_Os02g14460 // LOC_Os07g06380 // LOC_Os01g36350 // LOC_Os03g39650 // LOC_Os09g08920 // LOC_Os10g23180 // LOC_Os10g16974 // LOC_Os10g21050 // LOC_Os11g27730 // LOC_Os10g08319 // LOC_Os10g05490 // LOC_Os02g10120 // LOC_Os10g08474 // …
GO:0016746	F	transferase activity, transferring acyl groups	29	942	336	24460	0.00011	0.00096	// LOC_Os05g12210 // LOC_Os10g02000 // LOC_Os01g24790 // LOC_Os06g15170 // LOC_Os04g54550 // LOC_Os12g27350 // LOC_Os11g42480 // LOC_Os10g01920 // LOC_Os11g32650 // LOC_Os01g05820 // LOC_Os02g37750 // LOC_Os02g37654 // LOC_Os12g27254 // LOC_Os10g07616 // LOC_Os01g44069 // LOC_Os04g38450 // LOC_Os04g36800 // LOC_Os05g12240 // LOC_Os08g43020 // LOC_Os10g07040 // LOC_Os10g01660 // LOC_Os06g15020 // …
GO:0003993	F	acid phosphatase activity	9	942	45	24460	0.00015	0.0013	// LOC_Os01g09540 // LOC_Os05g10370 // LOC_Os05g10210 // LOC_Os05g09660 // LOC_Os08g17784 // LOC_Os05g09704 // LOC_Os08g41880 // LOC_Os05g09740 // LOC_Os05g10330
GO:0016747	F	transferase activity, transferring acyl groups other than amino-acyl groups	27	942	315	24460	0.00021	0.0016	// LOC_Os05g12210 // LOC_Os10g02000 // LOC_Os01g24790 // LOC_Os06g15170 // LOC_Os04g54550 // LOC_Os12g27350 // LOC_Os11g42480 // LOC_Os10g01920 // LOC_Os11g32650 // LOC_Os02g37750 // LOC_Os02g37654 // LOC_Os12g27254 // LOC_Os10g07616 // LOC_Os01g44069 // LOC_Os04g36800 // LOC_Os05g12240 // LOC_Os08g43020 // LOC_Os10g07040 // LOC_Os10g01660 // LOC_Os06g15020 // LOC_Os02g37700 // LOC_Os08g01960 // …
GO:0016984	F	ribulose-bisphosphate carboxylase activity	5	942	11	24460	0.00022	0.0016	// LOC_Os01g58020 // LOC_Os12g10580 // LOC_Os12g19381 // LOC_Os10g21268 // LOC_Os12g17600
GO:0016564	F	transcription repressor activity	6	942	20	24460	0.00031	0.0022	// LOC_Os03g15360 // LOC_Os12g16220 // LOC_Os01g01650 // LOC_Os02g47610 // LOC_Os12g16240 // LOC_Os01g01660
GO:0042578	F	phosphoric ester hydrolase activity	22	942	245	24460	0.00043	0.0029	// LOC_Os11g29370 // LOC_Os07g37230 // LOC_Os04g59310 // LOC_Os08g17784 // LOC_Os01g62760 // LOC_Os08g41880 // LOC_Os02g56170 // LOC_Os04g35100 // LOC_Os05g10370 // LOC_Os05g10210 // LOC_Os05g10330 // LOC_Os07g37220 // LOC_Os01g09540 // LOC_Os03g02740 // LOC_Os05g38290 // LOC_Os04g41340 // LOC_Os08g31060 // LOC_Os05g09660 // LOC_Os03g16170 // LOC_Os05g09704 // LOC_Os01g64660 // LOC_Os05g09740
GO:0030170	F	pyridoxal phosphate binding	15	942	140	24460	0.00067	0.0042	// LOC_Os09g28050 // LOC_Os01g51980 // LOC_Os06g40940 // LOC_Os10g25140 // LOC_Os02g19924 // LOC_Os01g52010 // LOC_Os08g10510 // LOC_Os10g37340 // LOC_Os04g54380 // LOC_Os08g39300 // LOC_Os02g19970 // LOC_Os03g21960 // LOC_Os09g38777 // LOC_Os04g08350 // LOC_Os07g01760
GO:0070279	F	vitamin B6 binding	15	942	140	24460	0.00067	0.0042	// LOC_Os09g28050 // LOC_Os01g51980 // LOC_Os06g40940 // LOC_Os10g25140 // LOC_Os02g19924 // LOC_Os01g52010 // LOC_Os08g10510 // LOC_Os10g37340 // LOC_Os04g54380 // LOC_Os08g39300 // LOC_Os02g19970 // LOC_Os03g21960 // LOC_Os09g38777 // LOC_Os04g08350 // LOC_Os07g01760
GO:0003872	F	6-phosphofructokinase activity	5	942	16	24460	0.00086	0.0052	// LOC_Os08g34050 // LOC_Os10g26570 // LOC_Os06g05860 // LOC_Os06g22060 // LOC_Os02g48360
GO:0004568	F	chitinase activity	6	942	26	24460	0.001	0.0059	// LOC_Os04g30770 // LOC_Os06g51060 // LOC_Os04g41620 // LOC_Os04g41680 // LOC_Os11g37970 // LOC_Os04g41640
GO:0008443	F	phosphofructokinase activity	5	942	18	24460	0.0013	0.0074	// LOC_Os08g34050 // LOC_Os10g26570 // LOC_Os06g05860 // LOC_Os06g22060 // LOC_Os02g48360
GO:0051287	F	NAD or NADH binding	8	942	53	24460	0.0018	0.0096	// LOC_Os08g34720 // LOC_Os06g46372 // LOC_Os07g31380 // LOC_Os02g01150 // LOC_Os06g45590 // LOC_Os04g16732 // LOC_Os02g07490 // LOC_Os10g35960
GO:0016791	F	phosphatase activity	17	942	202	24460	0.0034	0.018	// LOC_Os07g37220 // LOC_Os07g37230 // LOC_Os08g41880 // LOC_Os11g29370 // LOC_Os04g41340 // LOC_Os05g10370 // LOC_Os02g56170 // LOC_Os05g09660 // LOC_Os08g17784 // LOC_Os03g16170 // LOC_Os05g09704 // LOC_Os05g10210 // LOC_Os01g09540 // LOC_Os01g62760 // LOC_Os05g38290 // LOC_Os05g09740 // LOC_Os05g10330
GO:0019200	F	carbohydrate kinase activity	6	942	35	24460	0.0038	0.019	// LOC_Os08g34050 // LOC_Os02g48360 // LOC_Os10g26570 // LOC_Os01g53930 // LOC_Os06g22060 // LOC_Os06g05860
GO:0016903	F	oxidoreductase activity, acting on the aldehyde or oxo group of donors	5	942	27	24460	0.0061	0.029	// LOC_Os02g07490 // LOC_Os06g45590 // LOC_Os01g62900 // LOC_Os12g08260 // LOC_Os02g43194
GO:0019842	F	vitamin binding	17	942	217	24460	0.0066	0.031	// LOC_Os09g28050 // LOC_Os10g37340 // LOC_Os01g51980 // LOC_Os06g40940 // LOC_Os10g25140 // LOC_Os02g19924 // LOC_Os03g63930 // LOC_Os01g52010 // LOC_Os08g10510 // LOC_Os12g34890 // LOC_Os04g54380 // LOC_Os08g39300 // LOC_Os02g19970 // LOC_Os03g21960 // LOC_Os09g38777 // LOC_Os04g08350 // LOC_Os07g01760
GO:0016614	F	oxidoreductase activity, acting on CH-OH group of donors	11	942	116	24460	0.0077	0.034	// LOC_Os08g31030 // LOC_Os08g34720 // LOC_Os06g46372 // LOC_Os10g35960 // LOC_Os07g31380 // LOC_Os02g01150 // LOC_Os05g49880 // LOC_Os02g58790 // LOC_Os03g29150 // LOC_Os03g56280 // LOC_Os02g35500
GO:0050661	F	NADP or NADPH binding	6	942	41	24460	0.0075	0.034	// LOC_Os01g16714 // LOC_Os02g01340 // LOC_Os07g05400 // LOC_Os02g37010 // LOC_Os07g02140 // LOC_Os06g01850
GO:0016616	F	oxidoreductase activity, acting on the CH-OH group of donors, NAD or NADP as acceptor	10	942	103	24460	0.0094	0.038	// LOC_Os08g34720 // LOC_Os06g46372 // LOC_Os10g35960 // LOC_Os07g31380 // LOC_Os02g01150 // LOC_Os05g49880 // LOC_Os02g58790 // LOC_Os03g29150 // LOC_Os03g56280 // LOC_Os02g35500
GO:0015079	F	potassium ion transmembrane transporter activity	5	942	30	24460	0.0089	0.038	// LOC_Os03g37840 // LOC_Os06g15910 // LOC_Os09g27580 // LOC_Os08g36340 // LOC_Os08g10550
GO:0050660	F	FAD binding	13	942	153	24460	0.0091	0.038	// LOC_Os09g39380 // LOC_Os08g31030 // LOC_Os01g16714 // LOC_Os01g61410 // LOC_Os07g18154 // LOC_Os03g12910 // LOC_Os06g47000 // LOC_Os01g27050 // LOC_Os07g05400 // LOC_Os02g37010 // LOC_Os07g02140 // LOC_Os02g01340 // LOC_Os06g01850
GO:0016769	F	transferase activity, transferring nitrogenous groups	7	942	58	24460	0.01	0.04	// LOC_Os09g28050 // LOC_Os02g19924 // LOC_Os08g10510 // LOC_Os10g25140 // LOC_Os02g19970 // LOC_Os03g21960 // LOC_Os07g01760
GO:0016758	F	transferase activity, transferring hexosyl groups	28	942	450	24460	0.012	0.047	// LOC_Os06g18790 // LOC_Os09g34214 // LOC_Os02g11680 // LOC_Os04g24110 // LOC_Os10g07970 // LOC_Os10g32980 // LOC_Os07g32630 // LOC_Os03g28330 // LOC_Os07g30620 // LOC_Os06g18010 // LOC_Os07g22930 // LOC_Os05g45180 // LOC_Os02g37690 // LOC_Os10g30560 // LOC_Os07g10230 // LOC_Os01g54620 // LOC_Os07g42970 // LOC_Os06g18670 // LOC_Os11g26920 // LOC_Os07g32620 // LOC_Os01g43270 // LOC_Os02g36830 // …
GO:0030145	F	manganese ion binding	7	942	61	24460	0.013	0.048	// LOC_Os01g72300 // LOC_Os08g35750 // LOC_Os08g35760 // LOC_Os03g48780 // LOC_Os01g14670 // LOC_Os01g72290 // LOC_Os03g44880
GO:0045735	F	nutrient reservoir activity	8	942	77	24460	0.014	0.049	// LOC_Os01g72300 // LOC_Os08g35750 // LOC_Os08g35760 // LOC_Os09g37967 // LOC_Os03g48780 // LOC_Os01g14670 // LOC_Os01g72290 // LOC_Os03g44880
GO:0005215	F	transporter activity	58	942	1110	24460	0.015	0.053	// LOC_Os06g12310 // LOC_Os01g07730 // LOC_Os12g32940 // LOC_Os07g34570 // LOC_Os04g56240 // LOC_Os08g10550 // LOC_Os10g20390 // LOC_Os10g02220 // LOC_Os06g05160 // LOC_Os03g10090 // LOC_Os03g37470 // LOC_Os04g51610 // LOC_Os09g36930 // LOC_Os05g42250 // LOC_Os06g37010 // LOC_Os10g02260 // LOC_Os07g38400 // LOC_Os06g15910 // LOC_Os04g33900 // LOC_Os12g34890 // LOC_Os11g17970 // LOC_Os10g28440 // …
GO:0008236	F	serine-type peptidase activity	24	942	380	24460	0.017	0.056	// LOC_Os02g16709 // LOC_Os01g64860 // LOC_Os05g05480 // LOC_Os05g51450 // LOC_Os04g02970 // LOC_Os03g52070 // LOC_Os11g27264 // LOC_Os04g03050 // LOC_Os06g08720 // LOC_Os03g12940 // LOC_Os04g30130 // LOC_Os04g03810 // LOC_Os06g02900 // LOC_Os04g25560 // LOC_Os05g18604 // LOC_Os01g52750 // LOC_Os03g55640 // LOC_Os10g13770 // LOC_Os03g40830 // LOC_Os10g39150 // LOC_Os10g43050 // LOC_Os05g49380 // …
GO:0017171	F	serine hydrolase activity	24	942	380	24460	0.017	0.056	// LOC_Os02g16709 // LOC_Os01g64860 // LOC_Os05g05480 // LOC_Os05g51450 // LOC_Os04g02970 // LOC_Os03g52070 // LOC_Os11g27264 // LOC_Os04g03050 // LOC_Os06g08720 // LOC_Os03g12940 // LOC_Os04g30130 // LOC_Os04g03810 // LOC_Os06g02900 // LOC_Os04g25560 // LOC_Os05g18604 // LOC_Os01g52750 // LOC_Os03g55640 // LOC_Os10g13770 // LOC_Os03g40830 // LOC_Os10g39150 // LOC_Os10g43050 // LOC_Os05g49380 // …
GO:0016831	F	carboxy-lyase activity	7	942	66	24460	0.018	0.06	// LOC_Os01g58020 // LOC_Os12g10580 // LOC_Os03g15050 // LOC_Os12g17600 // LOC_Os06g04070 // LOC_Os12g19381 // LOC_Os10g21268
GO:0008415	F	acyltransferase activity	13	942	169	24460	0.018	0.06	// LOC_Os02g37700 // LOC_Os05g12240 // LOC_Os01g68020 // LOC_Os11g32650 // LOC_Os10g08670 // LOC_Os10g07040 // LOC_Os05g12210 // LOC_Os02g37750 // LOC_Os02g37654 // LOC_Os10g07616 // LOC_Os01g44069 // LOC_Os06g15170 // LOC_Os06g15020
GO:0004197	F	cysteine-type endopeptidase activity	8	942	86	24460	0.023	0.075	// LOC_Os04g01710 // LOC_Os03g27190 // LOC_Os03g27120 // LOC_Os09g27030 // LOC_Os03g54130 // LOC_Os08g44270 // LOC_Os09g39060 // LOC_Os01g73980
GO:0051540	F	metal cluster binding	8	942	90	24460	0.029	0.09	// LOC_Os06g05400 // LOC_Os07g18154 // LOC_Os06g28050 // LOC_Os03g59100 // LOC_Os12g19420 // LOC_Os06g22010 // LOC_Os07g30670 // LOC_Os01g74190
GO:0051536	F	iron-sulfur cluster binding	8	942	90	24460	0.029	0.09	// LOC_Os06g05400 // LOC_Os07g18154 // LOC_Os06g28050 // LOC_Os03g59100 // LOC_Os12g19420 // LOC_Os06g22010 // LOC_Os07g30670 // LOC_Os01g74190
GO:0016866	F	intramolecular transferase activity	5	942	44	24460	0.034	0.1	// LOC_Os11g18194 // LOC_Os01g55870 // LOC_Os12g38900 // LOC_Os02g51590 // LOC_Os06g28194
GO:0016298	F	lipase activity	8	942	93	24460	0.034	0.1	// LOC_Os10g30290 // LOC_Os04g56240 // LOC_Os04g59310 // LOC_Os01g15000 // LOC_Os05g06140 // LOC_Os08g31060 // LOC_Os03g02740 // LOC_Os04g35100
GO:0004857	F	enzyme inhibitor activity	12	942	170	24460	0.039	0.11	// LOC_Os10g36500 // LOC_Os02g52480 // LOC_Os07g11410 // LOC_Os11g40030 // LOC_Os02g33380 // LOC_Os01g03310 // LOC_Os02g52450 // LOC_Os07g11330 // LOC_Os07g11630 // LOC_Os10g10630 // LOC_Os03g01020 // LOC_Os01g03320
GO:0016830	F	carbon-carbon lyase activity	8	942	96	24460	0.04	0.11	// LOC_Os06g48620 // LOC_Os01g58020 // LOC_Os12g10580 // LOC_Os03g15050 // LOC_Os12g17600 // LOC_Os06g04070 // LOC_Os12g19381 // LOC_Os10g21268
GO:0016757	F	transferase activity, transferring glycosyl groups	30	942	547	24460	0.041	0.11	// LOC_Os06g18790 // LOC_Os09g34214 // LOC_Os02g11680 // LOC_Os04g24110 // LOC_Os10g07970 // LOC_Os05g35200 // LOC_Os07g32630 // LOC_Os10g32980 // LOC_Os03g28330 // LOC_Os07g30620 // LOC_Os06g18010 // LOC_Os07g22930 // LOC_Os05g45180 // LOC_Os02g37690 // LOC_Os10g30560 // LOC_Os07g10230 // LOC_Os01g54620 // LOC_Os07g42970 // LOC_Os06g18670 // LOC_Os11g26920 // LOC_Os07g32620 // LOC_Os01g43270 // …
GO:0070008	F	serine-type exopeptidase activity	6	942	63	24460	0.043	0.11	// LOC_Os03g52070 // LOC_Os05g18604 // LOC_Os11g27264 // LOC_Os06g08720 // LOC_Os10g39150 // LOC_Os04g25560
GO:0004185	F	serine-type carboxypeptidase activity	6	942	63	24460	0.043	0.11	// LOC_Os03g52070 // LOC_Os05g18604 // LOC_Os11g27264 // LOC_Os06g08720 // LOC_Os10g39150 // LOC_Os04g25560
GO:0015238	F	drug transmembrane transporter activity	6	942	66	24460	0.051	0.13	// LOC_Os03g42830 // LOC_Os01g49120 // LOC_Os10g20350 // LOC_Os10g20390 // LOC_Os03g37470 // LOC_Os12g03950
GO:0046873	F	metal ion transmembrane transporter activity	8	942	104	24460	0.057	0.15	// LOC_Os03g37840 // LOC_Os04g33900 // LOC_Os06g15910 // LOC_Os08g36340 // LOC_Os09g27580 // LOC_Os08g10550 // LOC_Os04g51610 // LOC_Os06g37010
GO:0000287	F	magnesium ion binding	10	942	142	24460	0.057	0.15	// LOC_Os01g68940 // LOC_Os02g36220 // LOC_Os03g27120 // LOC_Os03g22634 // LOC_Os08g07080 // LOC_Os03g22620 // LOC_Os04g01810 // LOC_Os05g24520 // LOC_Os08g04500 // LOC_Os04g27790
GO:0008289	F	lipid binding	7	942	88	24460	0.063	0.16	// LOC_Os12g02300 // LOC_Os03g59380 // LOC_Os08g34400 // LOC_Os03g58940 // LOC_Os02g51750 // LOC_Os11g02369 // LOC_Os01g62980
GO:0042802	F	identical protein binding	5	942	57	24460	0.08	0.2	// LOC_Os03g40830 // LOC_Os01g52750 // LOC_Os04g03810 // LOC_Os01g64860 // LOC_Os04g03050
GO:0030246	F	carbohydrate binding	18	942	327	24460	0.093	0.23	// LOC_Os03g06230 // LOC_Os03g15020 // LOC_Os04g42740 // LOC_Os04g34250 // LOC_Os01g66610 // LOC_Os06g51060 // LOC_Os04g54070 // LOC_Os01g65100 // LOC_Os05g30300 // LOC_Os04g56090 // LOC_Os04g05580 // LOC_Os08g44040 // LOC_Os06g28194 // LOC_Os04g41680 // LOC_Os12g03790 // LOC_Os04g41640 // LOC_Os10g19960 // LOC_Os07g18230
GO:0015297	F	antiporter activity	7	942	98	24460	0.096	0.23	// LOC_Os03g42830 // LOC_Os01g49120 // LOC_Os10g20350 // LOC_Os10g20390 // LOC_Os03g37470 // LOC_Os12g03950 // LOC_Os03g03590
GO:0004091	F	carboxylesterase activity	11	942	181	24460	0.1	0.24	// LOC_Os02g33380 // LOC_Os10g36500 // LOC_Os01g65070 // LOC_Os04g46740 // LOC_Os01g15000 // LOC_Os01g19440 // LOC_Os05g06140 // LOC_Os04g56240 // LOC_Os10g10630 // LOC_Os03g01020 // LOC_Os05g35730
GO:0016705	F	oxidoreductase activity, acting on paired donors, with incorporation or reduction of molecular oxygen	5	942	63	24460	0.11	0.25	// LOC_Os03g12910 // LOC_Os02g37010 // LOC_Os07g02140 // LOC_Os01g16714 // LOC_Os03g08570
GO:0008238	F	exopeptidase activity	7	942	105	24460	0.12	0.28	// LOC_Os03g52070 // LOC_Os05g18604 // LOC_Os11g27264 // LOC_Os06g08720 // LOC_Os05g44130 // LOC_Os10g39150 // LOC_Os04g25560
GO:0004180	F	carboxypeptidase activity	6	942	86	24460	0.13	0.28	// LOC_Os03g52070 // LOC_Os05g18604 // LOC_Os11g27264 // LOC_Os06g08720 // LOC_Os10g39150 // LOC_Os04g25560
GO:0015291	F	secondary active transmembrane transporter activity	9	942	147	24460	0.13	0.28	// LOC_Os03g42830 // LOC_Os01g49120 // LOC_Os10g20350 // LOC_Os10g20390 // LOC_Os06g05160 // LOC_Os06g05400 // LOC_Os03g37470 // LOC_Os12g03950 // LOC_Os03g03590
GO:0004867	F	serine-type endopeptidase inhibitor activity	5	942	69	24460	0.14	0.3	// LOC_Os01g03310 // LOC_Os07g11330 // LOC_Os07g11630 // LOC_Os07g11410 // LOC_Os01g03320
GO:0046527	F	glucosyltransferase activity	5	942	69	24460	0.14	0.3	// LOC_Os10g32980 // LOC_Os01g54620 // LOC_Os07g22930 // LOC_Os02g58480 // LOC_Os03g28330
GO:0016209	F	antioxidant activity	12	942	219	24460	0.15	0.32	// LOC_Os07g06175 // LOC_Os06g02500 // LOC_Os02g02400 // LOC_Os03g22010 // LOC_Os02g58720 // LOC_Os03g13200 // LOC_Os02g14440 // LOC_Os06g27850 // LOC_Os02g33450 // LOC_Os02g14460 // LOC_Os05g04500 // LOC_Os07g06380
GO:0016879	F	ligase activity, forming carbon-nitrogen bonds	12	942	225	24460	0.17	0.36	// LOC_Os05g06100 // LOC_Os04g56400 // LOC_Os12g07150 // LOC_Os08g37570 // LOC_Os12g16200 // LOC_Os07g49110 // LOC_Os01g03290 // LOC_Os01g03300 // LOC_Os11g06900 // LOC_Os03g18130 // LOC_Os10g40130 // LOC_Os02g12670
GO:0005507	F	copper ion binding	8	942	139	24460	0.18	0.37	// LOC_Os01g63190 // LOC_Os06g23114 // LOC_Os11g42220 // LOC_Os04g46130 // LOC_Os06g11490 // LOC_Os01g62480 // LOC_Os06g46740 // LOC_Os04g20164
GO:0030599	F	pectinesterase activity	6	942	98	24460	0.19	0.38	// LOC_Os10g36500 // LOC_Os04g46740 // LOC_Os02g33380 // LOC_Os01g19440 // LOC_Os10g10630 // LOC_Os03g01020
GO:0016853	F	isomerase activity	9	942	170	24460	0.22	0.44	// LOC_Os12g38900 // LOC_Os01g18210 // LOC_Os03g60509 // LOC_Os02g02890 // LOC_Os11g18194 // LOC_Os12g02370 // LOC_Os01g55870 // LOC_Os02g51590 // LOC_Os06g28194
GO:0022891	F	substrate-specific transmembrane transporter activity	26	942	573	24460	0.23	0.45	// LOC_Os12g32940 // LOC_Os03g37840 // LOC_Os03g10090 // LOC_Os04g51610 // LOC_Os05g42250 // LOC_Os06g37010 // LOC_Os03g40020 // LOC_Os03g55100 // LOC_Os06g15910 // LOC_Os06g05160 // LOC_Os08g36340 // LOC_Os04g38026 // LOC_Os10g31040 // LOC_Os06g10580 // LOC_Os04g33900 // LOC_Os01g51380 // LOC_Os01g71720 // LOC_Os11g41850 // LOC_Os06g05400 // LOC_Os01g37690 // LOC_Os08g10550 // LOC_Os03g03590 // …
GO:0022892	F	substrate-specific transporter activity	29	942	645	24460	0.23	0.45	// LOC_Os12g32940 // LOC_Os03g37840 // LOC_Os01g24060 // LOC_Os03g10090 // LOC_Os04g51610 // LOC_Os05g42250 // LOC_Os06g37010 // LOC_Os09g27580 // LOC_Os03g55100 // LOC_Os06g15910 // LOC_Os04g33900 // LOC_Os12g34890 // LOC_Os06g05160 // LOC_Os08g36340 // LOC_Os04g38026 // LOC_Os10g31040 // LOC_Os06g10580 // LOC_Os03g40020 // LOC_Os01g51380 // LOC_Os01g71720 // LOC_Os11g41850 // LOC_Os06g05400 // …
GO:0004252	F	serine-type endopeptidase activity	14	942	289	24460	0.24	0.46	// LOC_Os03g40830 // LOC_Os10g13770 // LOC_Os01g50680 // LOC_Os04g30130 // LOC_Os04g03050 // LOC_Os01g64860 // LOC_Os03g12940 // LOC_Os05g05480 // LOC_Os05g49380 // LOC_Os05g51450 // LOC_Os04g03810 // LOC_Os01g52750 // LOC_Os04g02970 // LOC_Os10g43050
GO:0022857	F	transmembrane transporter activity	32	942	722	24460	0.24	0.46	// LOC_Os12g32940 // LOC_Os03g37840 // LOC_Os10g20390 // LOC_Os03g10090 // LOC_Os03g37470 // LOC_Os04g51610 // LOC_Os05g42250 // LOC_Os06g37010 // LOC_Os09g27580 // LOC_Os03g55100 // LOC_Os06g15910 // LOC_Os04g33900 // LOC_Os06g05160 // LOC_Os08g36340 // LOC_Os04g38026 // LOC_Os10g31040 // LOC_Os06g08080 // LOC_Os03g42830 // LOC_Os01g49120 // LOC_Os06g10580 // LOC_Os03g40020 // LOC_Os01g51380 // …
GO:0016684	F	oxidoreductase activity, acting on peroxide as acceptor	10	942	201	24460	0.26	0.47	// LOC_Os07g06175 // LOC_Os02g02400 // LOC_Os03g22010 // LOC_Os02g58720 // LOC_Os03g13200 // LOC_Os02g14440 // LOC_Os06g27850 // LOC_Os02g14460 // LOC_Os05g04500 // LOC_Os07g06380
GO:0016874	F	ligase activity	16	942	342	24460	0.26	0.47	// LOC_Os01g03030 // LOC_Os05g06100 // LOC_Os04g56400 // LOC_Os12g07150 // LOC_Os08g37570 // LOC_Os12g16200 // LOC_Os01g03300 // LOC_Os07g49110 // LOC_Os01g03290 // LOC_Os03g36540 // LOC_Os11g06900 // LOC_Os03g18130 // LOC_Os10g38920 // LOC_Os07g47300 // LOC_Os10g40130 // LOC_Os02g12670
GO:0004601	F	peroxidase activity	10	942	201	24460	0.26	0.47	// LOC_Os07g06175 // LOC_Os02g02400 // LOC_Os03g22010 // LOC_Os02g58720 // LOC_Os03g13200 // LOC_Os02g14440 // LOC_Os06g27850 // LOC_Os02g14460 // LOC_Os05g04500 // LOC_Os07g06380
GO:0004866	F	endopeptidase inhibitor activity	5	942	88	24460	0.26	0.47	// LOC_Os01g03310 // LOC_Os07g11330 // LOC_Os07g11630 // LOC_Os07g11410 // LOC_Os01g03320
GO:0030414	F	peptidase inhibitor activity	5	942	90	24460	0.28	0.49	// LOC_Os01g03310 // LOC_Os07g11330 // LOC_Os07g11630 // LOC_Os07g11410 // LOC_Os01g03320
GO:0016881	F	acid-amino acid ligase activity	8	942	162	24460	0.3	0.52	// LOC_Os05g06100 // LOC_Os08g37570 // LOC_Os12g16200 // LOC_Os07g49110 // LOC_Os01g03290 // LOC_Os01g03300 // LOC_Os10g40130 // LOC_Os02g12670
GO:0004842	F	ubiquitin-protein ligase activity	5	942	96	24460	0.32	0.55	// LOC_Os01g03290 // LOC_Os05g06100 // LOC_Os08g37570 // LOC_Os02g12670 // LOC_Os01g03300
GO:0005198	F	structural molecule activity	23	942	531	24460	0.32	0.55	// LOC_Os02g57670 // LOC_Os04g34460 // LOC_Os03g34040 // LOC_Os04g38750 // LOC_Os01g69950 // LOC_Os03g12020 // LOC_Os01g16390 // LOC_Os04g46780 // LOC_Os12g24800 // LOC_Os02g37010 // LOC_Os02g51790 // LOC_Os02g43600 // LOC_Os06g46930 // LOC_Os06g39716 // LOC_Os10g21196 // LOC_Os03g55930 // LOC_Os05g32220 // LOC_Os01g59060 // LOC_Os06g05400 // LOC_Os03g24020 // LOC_Os08g17784 // LOC_Os12g10580 // …
GO:0030234	F	enzyme regulator activity	12	942	263	24460	0.32	0.55	// LOC_Os10g36500 // LOC_Os02g52480 // LOC_Os07g11410 // LOC_Os11g40030 // LOC_Os02g33380 // LOC_Os01g03310 // LOC_Os02g52450 // LOC_Os07g11330 // LOC_Os07g11630 // LOC_Os10g10630 // LOC_Os03g01020 // LOC_Os01g03320
GO:0005529	F	sugar binding	12	942	272	24460	0.36	0.61	// LOC_Os03g15020 // LOC_Os07g18230 // LOC_Os04g34250 // LOC_Os01g66610 // LOC_Os04g54070 // LOC_Os01g65100 // LOC_Os05g30300 // LOC_Os04g56090 // LOC_Os04g05580 // LOC_Os06g28194 // LOC_Os10g19960 // LOC_Os04g42740
GO:0015075	F	ion transmembrane transporter activity	19	942	449	24460	0.38	0.63	// LOC_Os03g37840 // LOC_Os06g08930 // LOC_Os03g55100 // LOC_Os06g10580 // LOC_Os03g40020 // LOC_Os01g51380 // LOC_Os06g15910 // LOC_Os04g33900 // LOC_Os08g36340 // LOC_Os06g05160 // LOC_Os06g05400 // LOC_Os01g37690 // LOC_Os09g27580 // LOC_Os08g10550 // LOC_Os12g03950 // LOC_Os04g51610 // LOC_Os03g03590 // LOC_Os05g42250 // LOC_Os06g37010
GO:0022890	F	inorganic cation transmembrane transporter activity	10	942	229	24460	0.39	0.65	// LOC_Os03g37840 // LOC_Os03g40020 // LOC_Os01g51380 // LOC_Os06g15910 // LOC_Os04g33900 // LOC_Os08g36340 // LOC_Os09g27580 // LOC_Os08g10550 // LOC_Os04g51610 // LOC_Os06g37010
GO:0005509	F	calcium ion binding	16	942	381	24460	0.4	0.66	// LOC_Os01g59360 // LOC_Os11g04770 // LOC_Os08g37570 // LOC_Os02g36850 // LOC_Os06g47000 // LOC_Os08g31060 // LOC_Os02g18880 // LOC_Os02g51750 // LOC_Os06g47640 // LOC_Os06g45380 // LOC_Os07g42730 // LOC_Os03g02740 // LOC_Os07g01480 // LOC_Os05g06920 // LOC_Os09g28500 // LOC_Os06g14350
GO:0008324	F	cation transmembrane transporter activity	14	942	342	24460	0.45	0.73	// LOC_Os03g37840 // LOC_Os03g40020 // LOC_Os01g51380 // LOC_Os06g15910 // LOC_Os04g33900 // LOC_Os08g36340 // LOC_Os06g05400 // LOC_Os01g37690 // LOC_Os09g27580 // LOC_Os08g10550 // LOC_Os12g03950 // LOC_Os04g51610 // LOC_Os03g03590 // LOC_Os06g37010
GO:0003735	F	structural constituent of ribosome	18	942	455	24460	0.49	0.78	// LOC_Os06g46930 // LOC_Os02g57670 // LOC_Os05g32220 // LOC_Os01g59060 // LOC_Os06g39716 // LOC_Os01g16390 // LOC_Os03g24020 // LOC_Os03g34040 // LOC_Os10g21196 // LOC_Os04g38750 // LOC_Os03g55930 // LOC_Os08g17784 // LOC_Os12g10580 // LOC_Os01g69950 // LOC_Os12g37610 // LOC_Os02g51790 // LOC_Os03g12020 // LOC_Os02g43600
GO:0030528	F	transcription regulator activity	40	942	1037	24460	0.52	0.82	// LOC_Os03g15360 // LOC_Os12g42400 // LOC_Os06g10880 // LOC_Os03g03000 // LOC_Os06g01934 // LOC_Os09g35030 // LOC_Os04g38770 // LOC_Os02g47610 // LOC_Os01g01660 // LOC_Os04g23440 // LOC_Os03g43810 // LOC_Os08g43600 // LOC_Os02g12790 // LOC_Os03g08500 // LOC_Os03g03260 // LOC_Os03g08754 // LOC_Os10g26460 // LOC_Os11g02540 // LOC_Os02g10760 // LOC_Os03g12940 // LOC_Os11g32100 // LOC_Os12g16240 // …
GO:0015077	F	monovalent inorganic cation transmembrane transporter activity	7	942	180	24460	0.54	0.85	// LOC_Os03g37840 // LOC_Os03g40020 // LOC_Os01g51380 // LOC_Os06g15910 // LOC_Os08g36340 // LOC_Os09g27580 // LOC_Os08g10550
GO:0022804	F	active transmembrane transporter activity	13	942	349	24460	0.59	0.91	// LOC_Os06g08080 // LOC_Os03g42830 // LOC_Os01g49120 // LOC_Os01g51380 // LOC_Os10g20350 // LOC_Os01g71720 // LOC_Os10g20390 // LOC_Os06g05160 // LOC_Os06g05400 // LOC_Os03g37470 // LOC_Os12g03950 // LOC_Os04g51610 // LOC_Os03g03590
GO:0019787	F	small conjugating protein ligase activity	5	942	140	24460	0.63	0.96	// LOC_Os01g03290 // LOC_Os05g06100 // LOC_Os08g37570 // LOC_Os02g12670 // LOC_Os01g03300
GO:0043169	F	cation binding	184	942	5841	24460	1	1	// LOC_Os10g34480 // LOC_Os06g04920 // LOC_Os09g27320 // LOC_Os11g32960 // LOC_Os01g70520 // LOC_Os08g09250 // LOC_Os07g42730 // LOC_Os05g27100 // LOC_Os03g39650 // LOC_Os12g12590 // LOC_Os06g37030 // LOC_Os08g37570 // LOC_Os03g22634 // LOC_Os10g21050 // LOC_Os09g09830 // LOC_Os01g03300 // LOC_Os02g51750 // LOC_Os03g48780 // LOC_Os10g36880 // LOC_Os02g29960 // LOC_Os01g72290 // LOC_Os01g45274 // …
GO:0003964	F	RNA-directed DNA polymerase activity	10	942	2703	24460	1	1	// LOC_Os02g29630 // LOC_Os09g04400 // LOC_Os03g15620 // LOC_Os11g24150 // LOC_Os10g24310 // LOC_Os11g07790 // LOC_Os06g03250 // LOC_Os05g07340 // LOC_Os06g30110 // LOC_Os05g24520
GO:0070001	F	aspartic-type peptidase activity	15	942	2120	24460	1	1	// LOC_Os06g03080 // LOC_Os01g04710 // LOC_Os02g48900 // LOC_Os07g46480 // LOC_Os09g04400 // LOC_Os10g24310 // LOC_Os09g05070 // LOC_Os06g03250 // LOC_Os06g03120 // LOC_Os05g24520 // LOC_Os07g38110 // LOC_Os01g50170 // LOC_Os06g02900 // LOC_Os06g02780 // LOC_Os11g07790
GO:0016740	F	transferase activity	161	942	6033	24460	1	1	// LOC_Os06g18790 // LOC_Os07g18230 // LOC_Os05g43930 // LOC_Os01g12570 // LOC_Os06g15170 // LOC_Os11g42480 // LOC_Os03g37120 // LOC_Os05g16430 // LOC_Os11g41650 // LOC_Os02g19924 // LOC_Os07g30620 // LOC_Os01g62900 // LOC_Os02g43870 // LOC_Os11g19880 // LOC_Os12g27254 // LOC_Os10g07616 // LOC_Os06g13350 // LOC_Os04g38450 // LOC_Os02g12670 // LOC_Os04g53230 // LOC_Os02g37690 // LOC_Os01g01302 // …
GO:0004713	F	protein tyrosine kinase activity	36	942	1426	24460	1	1	// LOC_Os04g42740 // LOC_Os04g34250 // LOC_Os04g09770 // LOC_Os03g20380 // LOC_Os01g45380 // LOC_Os02g40240 // LOC_Os05g40180 // LOC_Os12g39630 // LOC_Os07g18230 // LOC_Os03g37120 // LOC_Os05g16430 // LOC_Os02g42620 // LOC_Os07g43560 // LOC_Os11g02300 // LOC_Os02g43870 // LOC_Os04g05580 // LOC_Os09g25100 // LOC_Os02g12670 // LOC_Os11g07225 // LOC_Os01g33110 // LOC_Os04g54070 // LOC_Os01g59360 // …
GO:0016893	F	endonuclease activity, active with either ribo- or deoxyribonucleic acids and producing 5'-phosphomonoesters	7	942	1128	24460	1	1	// LOC_Os03g15620 // LOC_Os11g24150 // LOC_Os10g24310 // LOC_Os11g13420 // LOC_Os05g07340 // LOC_Os06g30110 // LOC_Os01g59510
GO:0016818	F	hydrolase activity, acting on acid anhydrides, in phosphorus-containing anhydrides	19	942	760	24460	0.98	1	// LOC_Os01g62500 // LOC_Os09g03939 // LOC_Os01g68940 // LOC_Os09g16449 // LOC_Os03g27120 // LOC_Os01g51380 // LOC_Os01g45450 // LOC_Os06g08080 // LOC_Os03g36540 // LOC_Os02g18450 // LOC_Os09g16380 // LOC_Os04g53760 // LOC_Os08g31460 // LOC_Os08g43400 // LOC_Os01g43120 // LOC_Os09g16290 // LOC_Os09g16458 // LOC_Os04g51610 // LOC_Os10g36880
GO:0046914	F	transition metal ion binding	116	942	4946	24460	1	1	// LOC_Os10g34480 // LOC_Os06g04920 // LOC_Os09g27320 // LOC_Os11g32960 // LOC_Os03g39650 // LOC_Os12g12590 // LOC_Os06g37030 // LOC_Os09g08920 // LOC_Os10g21050 // LOC_Os11g27730 // LOC_Os10g05490 // LOC_Os03g48780 // LOC_Os01g12740 // LOC_Os02g29960 // LOC_Os01g72290 // LOC_Os01g45274 // LOC_Os07g06175 // LOC_Os01g72740 // LOC_Os06g01250 // LOC_Os09g26200 // LOC_Os04g42020 // LOC_Os02g29640 // …
GO:0030554	F	adenyl nucleotide binding	99	942	3210	24460	0.99	1	// LOC_Os07g18230 // LOC_Os09g29840 // LOC_Os04g51610 // LOC_Os03g37120 // LOC_Os05g16430 // LOC_Os11g41650 // LOC_Os07g49110 // LOC_Os02g43870 // LOC_Os07g05400 // LOC_Os03g15050 // LOC_Os02g12670 // LOC_Os06g02380 // LOC_Os01g01302 // LOC_Os12g16200 // LOC_Os04g54070 // LOC_Os09g16380 // LOC_Os05g38010 // LOC_Os10g36880 // LOC_Os07g06570 // LOC_Os03g12910 // LOC_Os03g28300 // LOC_Os04g24110 // …
GO:0008270	F	zinc ion binding	48	942	3877	24460	1	1	// LOC_Os01g62500 // LOC_Os06g04920 // LOC_Os08g44230 // LOC_Os11g32960 // LOC_Os01g03290 // LOC_Os07g42924 // LOC_Os10g29470 // LOC_Os09g33876 // LOC_Os02g12790 // LOC_Os01g03300 // LOC_Os01g37460 // LOC_Os05g10670 // LOC_Os04g45990 // LOC_Os10g32980 // LOC_Os12g12590 // LOC_Os06g37030 // LOC_Os06g03250 // LOC_Os10g18160 // LOC_Os04g16970 // LOC_Os12g39190 // LOC_Os07g14150 // LOC_Os05g19250 // …
GO:0034061	F	DNA polymerase activity	10	942	2737	24460	1	1	// LOC_Os02g29630 // LOC_Os09g04400 // LOC_Os03g15620 // LOC_Os11g24150 // LOC_Os10g24310 // LOC_Os11g07790 // LOC_Os06g03250 // LOC_Os05g07340 // LOC_Os06g30110 // LOC_Os05g24520
GO:0016817	F	hydrolase activity, acting on acid anhydrides	19	942	787	24460	0.99	1	// LOC_Os01g62500 // LOC_Os09g03939 // LOC_Os01g68940 // LOC_Os09g16449 // LOC_Os03g27120 // LOC_Os01g51380 // LOC_Os01g45450 // LOC_Os06g08080 // LOC_Os03g36540 // LOC_Os02g18450 // LOC_Os09g16380 // LOC_Os04g53760 // LOC_Os08g31460 // LOC_Os08g43400 // LOC_Os01g43120 // LOC_Os09g16290 // LOC_Os09g16458 // LOC_Os04g51610 // LOC_Os10g36880
GO:0032559	F	adenyl ribonucleotide binding	86	942	3058	24460	1	1	// LOC_Os07g18230 // LOC_Os09g29840 // LOC_Os04g51610 // LOC_Os03g37120 // LOC_Os05g16430 // LOC_Os11g41650 // LOC_Os07g49110 // LOC_Os02g43870 // LOC_Os03g15050 // LOC_Os02g12670 // LOC_Os06g02380 // LOC_Os01g01302 // LOC_Os05g06320 // LOC_Os12g16200 // LOC_Os04g54070 // LOC_Os09g16380 // LOC_Os05g38010 // LOC_Os10g36880 // LOC_Os07g06570 // LOC_Os03g28300 // LOC_Os04g24110 // LOC_Os08g34050 // …
GO:0016891	F	endoribonuclease activity, producing 5'-phosphomonoesters	7	942	1122	24460	1	1	// LOC_Os03g15620 // LOC_Os11g24150 // LOC_Os10g24310 // LOC_Os11g13420 // LOC_Os05g07340 // LOC_Os06g30110 // LOC_Os01g59510
GO:0005488	F	binding	504	942	16899	24460	1	1	// LOC_Os10g34480 // LOC_Os06g04920 // LOC_Os05g43930 // LOC_Os09g32944 // LOC_Os09g29840 // LOC_Os01g62980 // LOC_Os03g02690 // LOC_Os08g37700 // LOC_Os03g39650 // LOC_Os03g22634 // LOC_Os05g02300 // LOC_Os02g43870 // LOC_Os10g05490 // LOC_Os02g51750 // LOC_Os11g19880 // LOC_Os11g02369 // LOC_Os11g22700 // LOC_Os02g12670 // LOC_Os06g02380 // LOC_Os01g01302 // LOC_Os01g63620 // LOC_Os07g07310 // …
GO:0016887	F	ATPase activity	8	942	371	24460	0.97	1	// LOC_Os09g03939 // LOC_Os09g16449 // LOC_Os09g16458 // LOC_Os01g51380 // LOC_Os09g16380 // LOC_Os01g43120 // LOC_Os09g16290 // LOC_Os04g51610
GO:0043167	F	ion binding	184	942	5845	24460	1	1	// LOC_Os10g34480 // LOC_Os06g04920 // LOC_Os09g27320 // LOC_Os11g32960 // LOC_Os01g70520 // LOC_Os08g09250 // LOC_Os07g42730 // LOC_Os05g27100 // LOC_Os03g39650 // LOC_Os12g12590 // LOC_Os06g37030 // LOC_Os08g37570 // LOC_Os03g22634 // LOC_Os10g21050 // LOC_Os09g09830 // LOC_Os01g03300 // LOC_Os02g51750 // LOC_Os03g48780 // LOC_Os10g36880 // LOC_Os02g29960 // LOC_Os01g72290 // LOC_Os01g45274 // …
GO:0008234	F	cysteine-type peptidase activity	9	942	473	24460	0.99	1	// LOC_Os04g01710 // LOC_Os03g27190 // LOC_Os03g27120 // LOC_Os07g29850 // LOC_Os09g27030 // LOC_Os03g54130 // LOC_Os08g44270 // LOC_Os09g39060 // LOC_Os01g73980
GO:0017076	F	purine nucleotide binding	102	942	3394	24460	1	1	// LOC_Os07g18230 // LOC_Os09g29840 // LOC_Os04g51610 // LOC_Os03g37120 // LOC_Os05g16430 // LOC_Os11g41650 // LOC_Os07g49110 // LOC_Os02g43870 // LOC_Os07g05400 // LOC_Os03g15050 // LOC_Os02g12670 // LOC_Os06g02380 // LOC_Os01g01302 // LOC_Os12g16200 // LOC_Os04g54070 // LOC_Os09g16380 // LOC_Os05g38010 // LOC_Os10g36880 // LOC_Os07g06570 // LOC_Os03g12910 // LOC_Os03g28300 // LOC_Os01g16030 // …
GO:0005524	F	ATP binding	86	942	3055	24460	1	1	// LOC_Os07g18230 // LOC_Os09g29840 // LOC_Os04g51610 // LOC_Os03g37120 // LOC_Os05g16430 // LOC_Os11g41650 // LOC_Os07g49110 // LOC_Os02g43870 // LOC_Os03g15050 // LOC_Os02g12670 // LOC_Os06g02380 // LOC_Os01g01302 // LOC_Os05g06320 // LOC_Os12g16200 // LOC_Os04g54070 // LOC_Os09g16380 // LOC_Os05g38010 // LOC_Os10g36880 // LOC_Os07g06570 // LOC_Os03g28300 // LOC_Os04g24110 // LOC_Os08g34050 // …
GO:0016787	F	hydrolase activity	195	942	6088	24460	1	1	// LOC_Os10g36500 // LOC_Os04g41640 // LOC_Os04g56240 // LOC_Os02g48900 // LOC_Os01g70520 // LOC_Os08g17784 // LOC_Os01g46260 // LOC_Os10g26720 // LOC_Os08g41880 // LOC_Os04g02970 // LOC_Os01g44960 // LOC_Os04g03050 // LOC_Os06g08720 // LOC_Os07g14150 // LOC_Os10g36880 // LOC_Os12g37910 // LOC_Os06g03080 // LOC_Os01g65070 // LOC_Os04g30770 // LOC_Os01g51380 // LOC_Os07g06840 // LOC_Os01g52750 // …
GO:0016788	F	hydrolase activity, acting on ester bonds	59	942	1871	24460	0.95	1	// LOC_Os11g29370 // LOC_Os07g37230 // LOC_Os01g22640 // LOC_Os04g46740 // LOC_Os04g59310 // LOC_Os01g19440 // LOC_Os10g10630 // LOC_Os10g36500 // LOC_Os05g10210 // LOC_Os08g17784 // LOC_Os06g03890 // LOC_Os08g31060 // LOC_Os01g46260 // LOC_Os01g62760 // LOC_Os10g26720 // LOC_Os08g41880 // LOC_Os04g35100 // LOC_Os01g09540 // LOC_Os10g30290 // LOC_Os10g24310 // LOC_Os05g10370 // LOC_Os02g56170 // …
GO:0032555	F	purine ribonucleotide binding	89	942	3238	24460	1	1	// LOC_Os07g18230 // LOC_Os09g29840 // LOC_Os04g51610 // LOC_Os03g37120 // LOC_Os05g16430 // LOC_Os11g41650 // LOC_Os07g49110 // LOC_Os02g43870 // LOC_Os03g15050 // LOC_Os02g12670 // LOC_Os06g02380 // LOC_Os01g01302 // LOC_Os12g16200 // LOC_Os04g54070 // LOC_Os09g16380 // LOC_Os05g38010 // LOC_Os10g36880 // LOC_Os07g06570 // LOC_Os03g28300 // LOC_Os01g16030 // LOC_Os04g24110 // LOC_Os08g34050 // …
GO:0016779	F	nucleotidyltransferase activity	13	942	2865	24460	1	1	// LOC_Os02g29630 // LOC_Os09g04400 // LOC_Os03g15620 // LOC_Os11g24150 // LOC_Os10g24310 // LOC_Os03g52460 // LOC_Os11g07790 // LOC_Os07g07310 // LOC_Os01g44220 // LOC_Os05g07340 // LOC_Os06g03250 // LOC_Os06g30110 // LOC_Os05g24520
GO:0016772	F	transferase activity, transferring phosphorus-containing groups	63	942	4672	24460	1	1	// LOC_Os02g29630 // LOC_Os08g34050 // LOC_Os04g42740 // LOC_Os06g16960 // LOC_Os03g52460 // LOC_Os02g46750 // LOC_Os04g09770 // LOC_Os03g20380 // LOC_Os01g45380 // LOC_Os05g50560 // LOC_Os02g40240 // LOC_Os05g40180 // LOC_Os12g39630 // LOC_Os07g18230 // LOC_Os09g04400 // LOC_Os03g37120 // LOC_Os05g16430 // LOC_Os02g42620 // LOC_Os07g43560 // LOC_Os06g03250 // LOC_Os10g24310 // LOC_Os11g02300 // …
GO:0016301	F	kinase activity	50	942	1756	24460	0.99	1	// LOC_Os08g34050 // LOC_Os04g42740 // LOC_Os06g16960 // LOC_Os02g46750 // LOC_Os04g09770 // LOC_Os03g20380 // LOC_Os01g45380 // LOC_Os05g50560 // LOC_Os02g40240 // LOC_Os05g40180 // LOC_Os12g39630 // LOC_Os07g18230 // LOC_Os03g37120 // LOC_Os05g16430 // LOC_Os02g42620 // LOC_Os07g43560 // LOC_Os11g02300 // LOC_Os01g62900 // LOC_Os02g43870 // LOC_Os04g05580 // LOC_Os05g06320 // LOC_Os09g25100 // …
GO:0046983	F	protein dimerization activity	15	942	424	24460	0.66	1	// LOC_Os05g43940 // LOC_Os11g19840 // LOC_Os06g16960 // LOC_Os08g43600 // LOC_Os05g43930 // LOC_Os06g22870 // LOC_Os08g01780 // LOC_Os11g19880 // LOC_Os06g10880 // LOC_Os10g02880 // LOC_Os02g57250 // LOC_Os04g11970 // LOC_Os11g20160 // LOC_Os12g25490 // LOC_Os12g25450
GO:0032553	F	ribonucleotide binding	89	942	3238	24460	1	1	// LOC_Os07g18230 // LOC_Os09g29840 // LOC_Os04g51610 // LOC_Os03g37120 // LOC_Os05g16430 // LOC_Os11g41650 // LOC_Os07g49110 // LOC_Os02g43870 // LOC_Os03g15050 // LOC_Os02g12670 // LOC_Os06g02380 // LOC_Os01g01302 // LOC_Os12g16200 // LOC_Os04g54070 // LOC_Os09g16380 // LOC_Os05g38010 // LOC_Os10g36880 // LOC_Os07g06570 // LOC_Os03g28300 // LOC_Os01g16030 // LOC_Os04g24110 // LOC_Os08g34050 // …
GO:0000166	F	nucleotide binding	119	942	3794	24460	0.99	1	// LOC_Os07g18230 // LOC_Os09g29840 // LOC_Os04g51610 // LOC_Os08g37700 // LOC_Os03g37120 // LOC_Os05g16430 // LOC_Os11g41650 // LOC_Os07g49110 // LOC_Os02g43870 // LOC_Os02g01150 // LOC_Os07g05400 // LOC_Os03g15050 // LOC_Os02g12670 // LOC_Os06g02380 // LOC_Os01g01302 // LOC_Os12g16200 // LOC_Os04g54070 // LOC_Os09g16380 // LOC_Os05g38010 // LOC_Os10g36880 // LOC_Os07g06570 // LOC_Os03g12910 // …
GO:0004521	F	endoribonuclease activity	9	942	1133	24460	1	1	// LOC_Os03g15620 // LOC_Os11g24150 // LOC_Os10g24310 // LOC_Os11g13420 // LOC_Os09g36680 // LOC_Os09g36700 // LOC_Os05g07340 // LOC_Os06g30110 // LOC_Os01g59510
GO:0043565	F	sequence-specific DNA binding	15	942	455	24460	0.76	1	// LOC_Os05g44400 // LOC_Os02g49840 // LOC_Os07g41370 // LOC_Os08g43600 // LOC_Os02g12790 // LOC_Os12g02470 // LOC_Os06g45640 // LOC_Os03g03260 // LOC_Os03g08754 // LOC_Os11g02540 // LOC_Os06g10880 // LOC_Os07g08140 // LOC_Os06g01934 // LOC_Os04g38770 // LOC_Os02g43330
GO:0004523	F	ribonuclease H activity	5	942	1107	24460	1	1	// LOC_Os10g24310 // LOC_Os05g07340 // LOC_Os03g15620 // LOC_Os11g24150 // LOC_Os06g30110
GO:0004674	F	protein serine/threonine kinase activity	35	942	1424	24460	1	1	// LOC_Os04g42740 // LOC_Os04g34250 // LOC_Os04g09770 // LOC_Os03g20380 // LOC_Os01g45380 // LOC_Os02g40240 // LOC_Os05g40180 // LOC_Os12g39630 // LOC_Os07g18230 // LOC_Os03g37120 // LOC_Os05g16430 // LOC_Os02g42620 // LOC_Os07g43560 // LOC_Os11g02300 // LOC_Os02g43870 // LOC_Os04g05580 // LOC_Os09g25100 // LOC_Os02g12670 // LOC_Os11g07225 // LOC_Os01g33110 // LOC_Os04g54070 // LOC_Os01g59360 // …
GO:0008233	F	peptidase activity	50	942	3151	24460	1	1	// LOC_Os01g62500 // LOC_Os01g04710 // LOC_Os09g05070 // LOC_Os05g05480 // LOC_Os02g16709 // LOC_Os02g48900 // LOC_Os06g03250 // LOC_Os07g29850 // LOC_Os04g01710 // LOC_Os01g64860 // LOC_Os03g27190 // LOC_Os08g44270 // LOC_Os05g51450 // LOC_Os07g38110 // LOC_Os04g02970 // LOC_Os09g04400 // LOC_Os03g52070 // LOC_Os10g24310 // LOC_Os11g27264 // LOC_Os04g03050 // LOC_Os06g08720 // LOC_Os03g12940 // …
GO:0004540	F	ribonuclease activity	10	942	1152	24460	1	1	// LOC_Os03g15620 // LOC_Os11g24150 // LOC_Os10g24310 // LOC_Os11g13420 // LOC_Os09g36680 // LOC_Os09g36700 // LOC_Os05g07340 // LOC_Os07g07310 // LOC_Os06g30110 // LOC_Os01g59510
GO:0004518	F	nuclease activity	12	942	1252	24460	1	1	// LOC_Os03g15620 // LOC_Os11g24150 // LOC_Os10g24310 // LOC_Os11g13420 // LOC_Os09g36680 // LOC_Os09g36700 // LOC_Os05g07340 // LOC_Os07g07310 // LOC_Os06g30110 // LOC_Os10g26720 // LOC_Os07g02150 // LOC_Os01g59510
GO:0016773	F	phosphotransferase activity, alcohol group as acceptor	47	942	1738	24460	1	1	// LOC_Os08g34050 // LOC_Os04g42740 // LOC_Os06g16960 // LOC_Os02g46750 // LOC_Os04g09770 // LOC_Os03g20380 // LOC_Os01g45380 // LOC_Os05g50560 // LOC_Os02g40240 // LOC_Os05g40180 // LOC_Os12g39630 // LOC_Os07g18230 // LOC_Os03g37120 // LOC_Os05g16430 // LOC_Os02g42620 // LOC_Os07g43560 // LOC_Os11g02300 // LOC_Os02g43870 // LOC_Os04g05580 // LOC_Os05g06320 // LOC_Os09g25100 // LOC_Os02g12670 // …
GO:0004190	F	aspartic-type endopeptidase activity	15	942	2120	24460	1	1	// LOC_Os06g03080 // LOC_Os01g04710 // LOC_Os02g48900 // LOC_Os07g46480 // LOC_Os09g04400 // LOC_Os10g24310 // LOC_Os09g05070 // LOC_Os06g03250 // LOC_Os06g03120 // LOC_Os05g24520 // LOC_Os07g38110 // LOC_Os01g50170 // LOC_Os06g02900 // LOC_Os06g02780 // LOC_Os11g07790
GO:0003723	F	RNA binding	24	942	3007	24460	1	1	// LOC_Os02g29630 // LOC_Os03g34040 // LOC_Os06g03250 // LOC_Os02g02390 // LOC_Os05g45920 // LOC_Os12g35630 // LOC_Os09g04400 // LOC_Os10g24310 // LOC_Os05g07340 // LOC_Os10g36860 // LOC_Os06g30110 // LOC_Os12g31000 // LOC_Os01g59510 // LOC_Os03g15620 // LOC_Os07g07310 // LOC_Os09g36700 // LOC_Os03g20100 // LOC_Os05g32220 // LOC_Os11g24150 // LOC_Os11g07790 // LOC_Os11g13420 // LOC_Os09g36680 // …
GO:0005515	F	protein binding	68	942	2836	24460	1	1	// LOC_Os03g12990 // LOC_Os06g16960 // LOC_Os07g07540 // LOC_Os05g43930 // LOC_Os06g22870 // LOC_Os01g03290 // LOC_Os08g32620 // LOC_Os04g57880 // LOC_Os04g57210 // LOC_Os02g57250 // LOC_Os06g10880 // LOC_Os02g40240 // LOC_Os04g35210 // LOC_Os05g05480 // LOC_Os02g40260 // LOC_Os11g20160 // LOC_Os08g17820 // LOC_Os05g16430 // LOC_Os08g43600 // LOC_Os03g14280 // LOC_Os04g03050 // LOC_Os01g03300 // …
GO:0004175	F	endopeptidase activity	39	942	2567	24460	1	1	// LOC_Os01g62500 // LOC_Os01g04710 // LOC_Os09g05070 // LOC_Os05g05480 // LOC_Os02g48900 // LOC_Os06g03250 // LOC_Os04g01710 // LOC_Os01g64860 // LOC_Os03g27190 // LOC_Os08g44270 // LOC_Os05g51450 // LOC_Os07g38110 // LOC_Os04g02970 // LOC_Os09g04400 // LOC_Os10g24310 // LOC_Os04g03050 // LOC_Os03g12940 // LOC_Os03g54130 // LOC_Os04g30130 // LOC_Os04g03810 // LOC_Os01g50170 // LOC_Os06g02900 // …
GO:0003676	F	nucleic acid binding	99	942	8081	24460	1	1	// LOC_Os04g47890 // LOC_Os09g32944 // LOC_Os05g45920 // LOC_Os07g28850 // LOC_Os10g26720 // LOC_Os01g51260 // LOC_Os08g37700 // LOC_Os05g48850 // LOC_Os03g08500 // LOC_Os03g03260 // LOC_Os03g08754 // LOC_Os10g36860 // LOC_Os11g22700 // LOC_Os03g44540 // LOC_Os12g31000 // LOC_Os05g46610 // LOC_Os02g49840 // LOC_Os07g07310 // LOC_Os03g21419 // LOC_Os10g41260 // LOC_Os12g42550 // LOC_Os09g05070 // …
GO:0003677	F	DNA binding	57	942	5202	24460	1	1	// LOC_Os11g05740 // LOC_Os02g04640 // LOC_Os12g42400 // LOC_Os09g32944 // LOC_Os06g03250 // LOC_Os09g37910 // LOC_Os06g10880 // LOC_Os12g42550 // LOC_Os01g69830 // LOC_Os06g01934 // LOC_Os09g35030 // LOC_Os04g38770 // LOC_Os12g39190 // LOC_Os02g49840 // LOC_Os05g33810 // LOC_Os05g48850 // LOC_Os08g43600 // LOC_Os02g12790 // LOC_Os06g40710 // LOC_Os01g42460 // LOC_Os08g37740 // LOC_Os03g03260 // …
GO:0001883	F	purine nucleoside binding	99	942	3210	24460	0.99	1	// LOC_Os07g18230 // LOC_Os09g29840 // LOC_Os04g51610 // LOC_Os03g37120 // LOC_Os05g16430 // LOC_Os11g41650 // LOC_Os07g49110 // LOC_Os02g43870 // LOC_Os07g05400 // LOC_Os03g15050 // LOC_Os02g12670 // LOC_Os06g02380 // LOC_Os01g01302 // LOC_Os12g16200 // LOC_Os04g54070 // LOC_Os09g16380 // LOC_Os05g38010 // LOC_Os10g36880 // LOC_Os07g06570 // LOC_Os03g12910 // LOC_Os03g28300 // LOC_Os04g24110 // …
GO:0001882	F	nucleoside binding	99	942	3220	24460	0.99	1	// LOC_Os07g18230 // LOC_Os09g29840 // LOC_Os04g51610 // LOC_Os03g37120 // LOC_Os05g16430 // LOC_Os11g41650 // LOC_Os07g49110 // LOC_Os02g43870 // LOC_Os07g05400 // LOC_Os03g15050 // LOC_Os02g12670 // LOC_Os06g02380 // LOC_Os01g01302 // LOC_Os12g16200 // LOC_Os04g54070 // LOC_Os09g16380 // LOC_Os05g38010 // LOC_Os10g36880 // LOC_Os07g06570 // LOC_Os03g12910 // LOC_Os03g28300 // LOC_Os04g24110 // …
GO:0046872	F	metal ion binding	161	942	5637	24460	1	1	// LOC_Os10g34480 // LOC_Os06g04920 // LOC_Os09g27320 // LOC_Os11g32960 // LOC_Os08g09250 // LOC_Os07g42730 // LOC_Os05g27100 // LOC_Os03g39650 // LOC_Os12g12590 // LOC_Os06g37030 // LOC_Os08g37570 // LOC_Os03g22634 // LOC_Os10g21050 // LOC_Os09g09830 // LOC_Os10g05490 // LOC_Os02g51750 // LOC_Os03g48780 // LOC_Os01g12740 // LOC_Os02g29960 // LOC_Os01g72290 // LOC_Os01g45274 // LOC_Os07g06175 // …
GO:0070011	F	peptidase activity, acting on L-amino acid peptides	50	942	3136	24460	1	1	// LOC_Os01g62500 // LOC_Os01g04710 // LOC_Os09g05070 // LOC_Os05g05480 // LOC_Os02g16709 // LOC_Os02g48900 // LOC_Os06g03250 // LOC_Os07g29850 // LOC_Os04g01710 // LOC_Os01g64860 // LOC_Os03g27190 // LOC_Os08g44270 // LOC_Os05g51450 // LOC_Os07g38110 // LOC_Os04g02970 // LOC_Os09g04400 // LOC_Os03g52070 // LOC_Os10g24310 // LOC_Os11g27264 // LOC_Os04g03050 // LOC_Os06g08720 // LOC_Os03g12940 // …
GO:0004672	F	protein kinase activity	40	942	1587	24460	1	1	// LOC_Os04g42740 // LOC_Os06g16960 // LOC_Os02g46750 // LOC_Os04g09770 // LOC_Os03g20380 // LOC_Os01g45380 // LOC_Os05g50560 // LOC_Os02g40240 // LOC_Os05g40180 // LOC_Os12g39630 // LOC_Os07g18230 // LOC_Os03g37120 // LOC_Os05g16430 // LOC_Os02g42620 // LOC_Os07g43560 // LOC_Os11g02300 // LOC_Os02g43870 // LOC_Os04g05580 // LOC_Os05g06320 // LOC_Os09g25100 // LOC_Os02g12670 // LOC_Os11g07225 // …
GO:0017111	F	nucleoside-triphosphatase activity	16	942	714	24460	0.99	1	// LOC_Os01g62500 // LOC_Os09g03939 // LOC_Os09g16449 // LOC_Os09g16458 // LOC_Os01g51380 // LOC_Os01g45450 // LOC_Os04g53760 // LOC_Os03g36540 // LOC_Os02g18450 // LOC_Os09g16380 // LOC_Os08g31460 // LOC_Os08g43400 // LOC_Os01g43120 // LOC_Os09g16290 // LOC_Os04g51610 // LOC_Os10g36880
GO:0003700	F	transcription factor activity	22	942	682	24460	0.82	1	// LOC_Os04g38770 // LOC_Os12g42400 // LOC_Os06g10880 // LOC_Os06g01934 // LOC_Os09g35030 // LOC_Os02g12790 // LOC_Os08g43600 // LOC_Os03g08500 // LOC_Os03g03260 // LOC_Os03g08754 // LOC_Os11g02540 // LOC_Os02g10760 // LOC_Os03g44540 // LOC_Os07g41720 // LOC_Os02g49840 // LOC_Os07g08140 // LOC_Os05g44400 // LOC_Os07g41370 // LOC_Os12g02470 // LOC_Os03g48970 // LOC_Os03g08490 // LOC_Os02g43330
GO:0004519	F	endonuclease activity	9	942	1168	24460	1	1	// LOC_Os03g15620 // LOC_Os11g24150 // LOC_Os10g24310 // LOC_Os11g13420 // LOC_Os09g36680 // LOC_Os09g36700 // LOC_Os05g07340 // LOC_Os06g30110 // LOC_Os01g59510
GO:0016462	F	pyrophosphatase activity	19	942	747	24460	0.98	1	// LOC_Os01g62500 // LOC_Os09g03939 // LOC_Os01g68940 // LOC_Os09g16449 // LOC_Os03g27120 // LOC_Os01g51380 // LOC_Os01g45450 // LOC_Os06g08080 // LOC_Os03g36540 // LOC_Os02g18450 // LOC_Os09g16380 // LOC_Os04g53760 // LOC_Os08g31460 // LOC_Os08g43400 // LOC_Os01g43120 // LOC_Os09g16290 // LOC_Os09g16458 // LOC_Os04g51610 // LOC_Os10g36880
GO:0016020	C	membrane	111	942	2185	24460	0.0023	0.015	// LOC_Os12g32940 // LOC_Os08g10550 // LOC_Os11g32960 // LOC_Os08g37370 // LOC_Os03g10090 // LOC_Os06g15170 // LOC_Os04g51610 // LOC_Os05g13320 // LOC_Os10g02260 // LOC_Os07g38400 // LOC_Os11g24450 // LOC_Os09g27580 // LOC_Os07g05400 // LOC_Os03g22200 // LOC_Os03g02590 // LOC_Os02g10350 // LOC_Os01g51380 // LOC_Os05g27304 // LOC_Os09g16380 // LOC_Os01g58910 // LOC_Os11g42490 // LOC_Os09g25810 // …
GO:0044436	C	thylakoid part	6	942	31	24460	0.0022	0.015	// LOC_Os02g36850 // LOC_Os02g01340 // LOC_Os07g05400 // LOC_Os01g65902 // LOC_Os07g01480 // LOC_Os06g01850
GO:0048046	C	apoplast	11	942	94	24460	0.0018	0.015	// LOC_Os01g63190 // LOC_Os01g72300 // LOC_Os03g13570 // LOC_Os01g62480 // LOC_Os03g44880 // LOC_Os08g35750 // LOC_Os03g01800 // LOC_Os08g35760 // LOC_Os03g48780 // LOC_Os01g14670 // LOC_Os01g72290
GO:0005945	C	6-phosphofructokinase complex	5	942	16	24460	0.00086	0.015	// LOC_Os08g34050 // LOC_Os10g26570 // LOC_Os06g05860 // LOC_Os06g22060 // LOC_Os02g48360
GO:0005576	C	extracellular region	22	942	269	24460	0.0013	0.015	// LOC_Os03g12990 // LOC_Os03g25990 // LOC_Os01g72300 // LOC_Os01g62480 // LOC_Os01g01660 // LOC_Os01g03310 // LOC_Os08g35750 // LOC_Os07g11330 // LOC_Os03g48780 // LOC_Os01g03320 // LOC_Os01g72290 // LOC_Os07g11410 // LOC_Os03g13570 // LOC_Os01g14670 // LOC_Os01g01650 // LOC_Os04g46630 // LOC_Os01g63190 // LOC_Os03g01800 // LOC_Os08g35760 // LOC_Os02g42650 // LOC_Os01g28500 // LOC_Os03g44880
GO:0009579	C	thylakoid	9	942	72	24460	0.0031	0.017	// LOC_Os08g15322 // LOC_Os02g36850 // LOC_Os02g01340 // LOC_Os01g58049 // LOC_Os07g05400 // LOC_Os01g65902 // LOC_Os07g01480 // LOC_Os06g01850 // LOC_Os06g39708
GO:0034357	C	photosynthetic membrane	8	942	69	24460	0.0076	0.037	// LOC_Os08g15322 // LOC_Os02g36850 // LOC_Os02g01340 // LOC_Os07g05400 // LOC_Os01g65902 // LOC_Os07g01480 // LOC_Os06g01850 // LOC_Os06g39708
GO:0005829	C	cytosol	5	942	33	24460	0.013	0.048	// LOC_Os08g34050 // LOC_Os10g26570 // LOC_Os06g05860 // LOC_Os06g22060 // LOC_Os02g48360
GO:0044445	C	cytosolic part	5	942	33	24460	0.013	0.048	// LOC_Os08g34050 // LOC_Os10g26570 // LOC_Os06g05860 // LOC_Os06g22060 // LOC_Os02g48360
GO:0031224	C	intrinsic to membrane	38	942	748	24460	0.059	0.2	// LOC_Os01g62500 // LOC_Os06g12310 // LOC_Os08g43320 // LOC_Os01g07730 // LOC_Os12g32940 // LOC_Os01g24060 // LOC_Os03g10090 // LOC_Os01g53060 // LOC_Os05g13320 // LOC_Os06g37010 // LOC_Os02g30910 // LOC_Os09g36930 // LOC_Os02g41860 // LOC_Os11g43860 // LOC_Os06g05160 // LOC_Os01g58049 // LOC_Os04g38026 // LOC_Os03g22200 // LOC_Os02g37010 // LOC_Os10g31040 // LOC_Os08g15322 // LOC_Os02g10350 // …
GO:0016021	C	integral to membrane	36	942	727	24460	0.084	0.26	// LOC_Os01g62500 // LOC_Os06g12310 // LOC_Os08g43320 // LOC_Os01g07730 // LOC_Os12g32940 // LOC_Os01g24060 // LOC_Os03g10090 // LOC_Os01g53060 // LOC_Os05g13320 // LOC_Os06g37010 // LOC_Os02g30910 // LOC_Os09g36930 // LOC_Os02g41860 // LOC_Os11g43860 // LOC_Os06g05160 // LOC_Os01g58049 // LOC_Os04g38026 // LOC_Os03g22200 // LOC_Os10g31040 // LOC_Os08g15322 // LOC_Os02g10350 // LOC_Os11g41850 // …
GO:0030312	C	external encapsulating structure	6	942	103	24460	0.22	0.58	// LOC_Os01g08510 // LOC_Os03g13570 // LOC_Os04g46740 // LOC_Os07g49110 // LOC_Os03g01800 // LOC_Os01g19440
GO:0005618	C	cell wall	5	942	82	24460	0.22	0.58	// LOC_Os03g01800 // LOC_Os04g46740 // LOC_Os07g49110 // LOC_Os03g13570 // LOC_Os01g19440
GO:0005737	C	cytoplasm	53	942	1271	24460	0.3	0.73	// LOC_Os02g57670 // LOC_Os03g12810 // LOC_Os08g34050 // LOC_Os01g24060 // LOC_Os03g34040 // LOC_Os02g48360 // LOC_Os08g17784 // LOC_Os08g37370 // LOC_Os01g69950 // LOC_Os03g02590 // LOC_Os10g40130 // LOC_Os03g02690 // LOC_Os04g16734 // LOC_Os03g12020 // LOC_Os01g16390 // LOC_Os01g62900 // LOC_Os11g24450 // LOC_Os01g05060 // LOC_Os02g37010 // LOC_Os02g51790 // LOC_Os04g53230 // LOC_Os06g46930 // …
GO:0044425	C	membrane part	42	942	1006	24460	0.32	0.73	// LOC_Os01g62500 // LOC_Os06g12310 // LOC_Os08g43320 // LOC_Os06g39708 // LOC_Os01g07730 // LOC_Os12g32940 // LOC_Os01g24060 // LOC_Os03g10090 // LOC_Os01g53060 // LOC_Os05g13320 // LOC_Os06g37010 // LOC_Os02g30910 // LOC_Os09g36930 // LOC_Os02g41860 // LOC_Os11g43860 // LOC_Os06g05160 // LOC_Os01g58049 // LOC_Os04g38026 // LOC_Os03g22200 // LOC_Os02g37010 // LOC_Os10g31040 // LOC_Os08g15322 // …
GO:0031090	C	organelle membrane	9	942	197	24460	0.36	0.76	// LOC_Os01g12520 // LOC_Os02g01340 // LOC_Os11g24450 // LOC_Os07g05400 // LOC_Os01g65902 // LOC_Os02g37010 // LOC_Os07g02140 // LOC_Os06g01850 // LOC_Os03g02590
GO:0005840	C	ribosome	19	942	456	24460	0.4	0.8	// LOC_Os06g46930 // LOC_Os02g57670 // LOC_Os05g32220 // LOC_Os01g59060 // LOC_Os06g39716 // LOC_Os01g16390 // LOC_Os03g24020 // LOC_Os03g34040 // LOC_Os10g21196 // LOC_Os04g38750 // LOC_Os03g55930 // LOC_Os08g17784 // LOC_Os12g10580 // LOC_Os01g69950 // LOC_Os05g49130 // LOC_Os02g51790 // LOC_Os12g37610 // LOC_Os03g12020 // LOC_Os02g43600
GO:0044444	C	cytoplasmic part	37	942	960	24460	0.52	0.99	// LOC_Os02g57670 // LOC_Os08g34050 // LOC_Os03g34040 // LOC_Os08g17784 // LOC_Os08g37370 // LOC_Os01g69950 // LOC_Os04g16734 // LOC_Os03g12020 // LOC_Os01g16390 // LOC_Os11g24450 // LOC_Os01g05060 // LOC_Os02g37010 // LOC_Os02g51790 // LOC_Os03g02590 // LOC_Os06g46930 // LOC_Os01g12520 // LOC_Os10g37180 // LOC_Os08g15322 // LOC_Os02g43600 // LOC_Os01g04640 // LOC_Os06g39716 // LOC_Os10g21196 // …
GO:0044424	C	intracellular part	119	942	3831	24460	1	1	// LOC_Os06g22870 // LOC_Os09g32944 // LOC_Os04g38750 // LOC_Os08g37370 // LOC_Os01g69830 // LOC_Os03g02690 // LOC_Os04g23440 // LOC_Os08g37570 // LOC_Os11g40030 // LOC_Os01g62900 // LOC_Os03g03260 // LOC_Os11g24450 // LOC_Os07g05400 // LOC_Os03g44540 // LOC_Os02g12670 // LOC_Os04g53230 // LOC_Os06g46930 // LOC_Os02g49840 // LOC_Os06g39716 // LOC_Os10g36880 // LOC_Os01g68020 // LOC_Os03g27120 // …
GO:0044464	C	cell part	241	942	6353	24460	0.62	1	// LOC_Os12g32940 // LOC_Os06g45640 // LOC_Os06g04920 // LOC_Os06g22870 // LOC_Os11g32960 // LOC_Os09g32944 // LOC_Os02g57250 // LOC_Os08g17784 // LOC_Os08g37370 // LOC_Os01g69830 // LOC_Os06g15170 // LOC_Os10g26720 // LOC_Os04g51610 // LOC_Os03g02690 // LOC_Os04g23440 // LOC_Os10g02260 // LOC_Os07g38400 // LOC_Os08g37570 // LOC_Os08g01140 // LOC_Os07g49110 // LOC_Os11g40030 // LOC_Os01g62900 // …
GO:0043234	C	protein complex	25	942	799	24460	0.87	1	// LOC_Os08g34050 // LOC_Os06g39708 // LOC_Os01g24060 // LOC_Os08g43400 // LOC_Os01g62760 // LOC_Os08g37570 // LOC_Os02g12730 // LOC_Os10g19960 // LOC_Os03g16170 // LOC_Os02g12670 // LOC_Os10g37180 // LOC_Os08g15322 // LOC_Os01g51380 // LOC_Os04g53760 // LOC_Os10g26570 // LOC_Os05g38290 // LOC_Os10g36880 // LOC_Os03g15020 // LOC_Os06g22060 // LOC_Os02g48360 // LOC_Os02g36850 // LOC_Os12g13360 // …
GO:0043231	C	intracellular membrane-bounded organelle	65	942	2504	24460	1	1	// LOC_Os08g15322 // LOC_Os05g33810 // LOC_Os01g24060 // LOC_Os06g22870 // LOC_Os09g32944 // LOC_Os06g03250 // LOC_Os03g03000 // LOC_Os09g37910 // LOC_Os06g10880 // LOC_Os08g37370 // LOC_Os01g69830 // LOC_Os06g01934 // LOC_Os04g38770 // LOC_Os11g24450 // LOC_Os04g16734 // LOC_Os04g23440 // LOC_Os03g43810 // LOC_Os02g52480 // LOC_Os08g43600 // LOC_Os02g12790 // LOC_Os11g40030 // LOC_Os03g03260 // …
GO:0043232	C	intracellular non-membrane-bounded organelle	26	942	1590	24460	1	1	// LOC_Os02g57670 // LOC_Os11g07790 // LOC_Os03g34040 // LOC_Os06g03250 // LOC_Os04g38750 // LOC_Os08g43400 // LOC_Os01g69950 // LOC_Os03g12020 // LOC_Os01g16390 // LOC_Os02g51790 // LOC_Os02g43600 // LOC_Os06g46930 // LOC_Os06g39716 // LOC_Os04g53760 // LOC_Os10g21196 // LOC_Os03g55930 // LOC_Os05g02300 // LOC_Os12g37610 // LOC_Os10g36880 // LOC_Os05g32220 // LOC_Os01g59060 // LOC_Os04g43290 // …
GO:0044422	C	organelle part	23	942	1518	24460	1	1	// LOC_Os01g24060 // LOC_Os03g34040 // LOC_Os06g03250 // LOC_Os08g43400 // LOC_Os03g12020 // LOC_Os11g24450 // LOC_Os07g05400 // LOC_Os06g01850 // LOC_Os01g05060 // LOC_Os02g37010 // LOC_Os03g02590 // LOC_Os01g12520 // LOC_Os04g53760 // LOC_Os01g65902 // LOC_Os05g02300 // LOC_Os10g36880 // LOC_Os05g32220 // LOC_Os02g36850 // LOC_Os02g01340 // LOC_Os11g07790 // LOC_Os01g53930 // LOC_Os07g01480 // …
GO:0043229	C	intracellular organelle	93	942	3164	24460	1	1	// LOC_Os06g22870 // LOC_Os09g32944 // LOC_Os04g38750 // LOC_Os08g37370 // LOC_Os01g69830 // LOC_Os04g23440 // LOC_Os11g40030 // LOC_Os03g03260 // LOC_Os11g24450 // LOC_Os07g05400 // LOC_Os03g44540 // LOC_Os03g02590 // LOC_Os06g46930 // LOC_Os02g49840 // LOC_Os06g39716 // LOC_Os10g36880 // LOC_Os01g59060 // LOC_Os07g37010 // LOC_Os08g17784 // LOC_Os03g48970 // LOC_Os07g01480 // LOC_Os02g57670 // …
GO:0043228	C	non-membrane-bounded organelle	26	942	1590	24460	1	1	// LOC_Os02g57670 // LOC_Os11g07790 // LOC_Os03g34040 // LOC_Os06g03250 // LOC_Os04g38750 // LOC_Os08g43400 // LOC_Os01g69950 // LOC_Os03g12020 // LOC_Os01g16390 // LOC_Os02g51790 // LOC_Os02g43600 // LOC_Os06g46930 // LOC_Os06g39716 // LOC_Os04g53760 // LOC_Os10g21196 // LOC_Os03g55930 // LOC_Os05g02300 // LOC_Os12g37610 // LOC_Os10g36880 // LOC_Os05g32220 // LOC_Os01g59060 // LOC_Os04g43290 // …
GO:0005622	C	intracellular	138	942	4460	24460	1	1	// LOC_Os06g04920 // LOC_Os06g22870 // LOC_Os09g32944 // LOC_Os02g57250 // LOC_Os08g17784 // LOC_Os08g37370 // LOC_Os01g69830 // LOC_Os10g26720 // LOC_Os03g02690 // LOC_Os04g23440 // LOC_Os08g37570 // LOC_Os11g40030 // LOC_Os01g62900 // LOC_Os03g03260 // LOC_Os11g24450 // LOC_Os07g05400 // LOC_Os03g44540 // LOC_Os02g12670 // LOC_Os04g53230 // LOC_Os06g46930 // LOC_Os02g49840 // LOC_Os06g39716 // …
GO:0043227	C	membrane-bounded organelle	69	942	2519	24460	1	1	// LOC_Os08g15322 // LOC_Os05g33810 // LOC_Os01g24060 // LOC_Os06g22870 // LOC_Os09g32944 // LOC_Os06g03250 // LOC_Os03g03000 // LOC_Os09g37910 // LOC_Os02g57250 // LOC_Os06g10880 // LOC_Os08g37370 // LOC_Os01g69830 // LOC_Os06g01934 // LOC_Os04g38770 // LOC_Os11g24450 // LOC_Os04g16734 // LOC_Os06g01850 // LOC_Os04g23440 // LOC_Os03g43810 // LOC_Os02g52480 // LOC_Os08g43600 // LOC_Os02g12790 // …
GO:0043226	C	organelle	93	942	3164	24460	1	1	// LOC_Os06g22870 // LOC_Os09g32944 // LOC_Os04g38750 // LOC_Os08g37370 // LOC_Os01g69830 // LOC_Os04g23440 // LOC_Os11g40030 // LOC_Os03g03260 // LOC_Os11g24450 // LOC_Os07g05400 // LOC_Os03g44540 // LOC_Os03g02590 // LOC_Os06g46930 // LOC_Os02g49840 // LOC_Os06g39716 // LOC_Os10g36880 // LOC_Os01g59060 // LOC_Os07g37010 // LOC_Os08g17784 // LOC_Os03g48970 // LOC_Os07g01480 // LOC_Os02g57670 // …
GO:0044446	C	intracellular organelle part	23	942	1518	24460	1	1	// LOC_Os01g24060 // LOC_Os03g34040 // LOC_Os06g03250 // LOC_Os08g43400 // LOC_Os03g12020 // LOC_Os11g24450 // LOC_Os07g05400 // LOC_Os06g01850 // LOC_Os01g05060 // LOC_Os02g37010 // LOC_Os03g02590 // LOC_Os01g12520 // LOC_Os04g53760 // LOC_Os01g65902 // LOC_Os05g02300 // LOC_Os10g36880 // LOC_Os05g32220 // LOC_Os02g36850 // LOC_Os02g01340 // LOC_Os11g07790 // LOC_Os01g53930 // LOC_Os07g01480 // …
GO:0005634	C	nucleus	52	942	2173	24460	1	1	// LOC_Os05g33810 // LOC_Os01g24060 // LOC_Os06g22870 // LOC_Os09g32944 // LOC_Os06g03250 // LOC_Os03g03000 // LOC_Os09g37910 // LOC_Os06g10880 // LOC_Os01g69830 // LOC_Os06g01934 // LOC_Os04g38770 // LOC_Os01g03300 // LOC_Os04g23440 // LOC_Os03g43810 // LOC_Os02g52480 // LOC_Os08g43600 // LOC_Os02g12790 // LOC_Os11g40030 // LOC_Os03g03260 // LOC_Os03g08754 // LOC_Os10g26460 // LOC_Os11g02540 // …
GO:0030529	C	ribonucleoprotein complex	19	942	503	24460	0.57	1	// LOC_Os06g46930 // LOC_Os02g57670 // LOC_Os05g32220 // LOC_Os01g59060 // LOC_Os06g39716 // LOC_Os01g16390 // LOC_Os03g24020 // LOC_Os03g34040 // LOC_Os10g21196 // LOC_Os04g38750 // LOC_Os03g55930 // LOC_Os08g17784 // LOC_Os12g10580 // LOC_Os01g69950 // LOC_Os05g49130 // LOC_Os02g51790 // LOC_Os12g37610 // LOC_Os03g12020 // LOC_Os02g43600
GO:0005623	C	cell	241	942	6353	24460	0.62	1	// LOC_Os12g32940 // LOC_Os06g45640 // LOC_Os06g04920 // LOC_Os06g22870 // LOC_Os11g32960 // LOC_Os09g32944 // LOC_Os02g57250 // LOC_Os08g17784 // LOC_Os08g37370 // LOC_Os01g69830 // LOC_Os06g15170 // LOC_Os10g26720 // LOC_Os04g51610 // LOC_Os03g02690 // LOC_Os04g23440 // LOC_Os10g02260 // LOC_Os07g38400 // LOC_Os08g37570 // LOC_Os08g01140 // LOC_Os07g49110 // LOC_Os11g40030 // LOC_Os01g62900 // …
GO:0032991	C	macromolecular complex	45	942	1365	24460	0.87	1	// LOC_Os02g57670 // LOC_Os08g34050 // LOC_Os06g39708 // LOC_Os01g24060 // LOC_Os03g34040 // LOC_Os08g17784 // LOC_Os08g43400 // LOC_Os01g69950 // LOC_Os01g62760 // LOC_Os03g12020 // LOC_Os08g37570 // LOC_Os01g16390 // LOC_Os02g12730 // LOC_Os01g51380 // LOC_Os10g36880 // LOC_Os12g13360 // LOC_Os02g43600 // LOC_Os02g51790 // LOC_Os02g12670 // LOC_Os12g10580 // LOC_Os06g46930 // LOC_Os10g37180 // …
