# Supplementary material for: RNA-Seq Analysis of Diverse Rice Genotypes to Identify the Genes Controlling Coleoptile Growth during Submerged Germination
Source: Front Plant Sci. 2017 May 15;8:762. doi: 10.3389/fpls.2017.00762 (PMC5430036; doi:10.3389/fpls.2017.00762)
Supplement: Supplementary file 7 [file Table7.xlsx]

## Sheet: 2026 DE genes in groups
Table S7. DE genes detected in six genotypes and grouped based on significance at P < 0.05
MSU ID	IRGSP ID	Genomic position (Gramene IRGSP-1.0)			Nipponbare				IR64				F291				F274-2a				X8391				X8753				Gene description (IRGSP 1.0)	Co-localization with reported QTL interval
		Chr.	start	end	C	T	log2 (F.C.)	p-value	C	T	log2 (F.C.)	p-value	C	T	log2 (F.C.)	p-value	C	T	log2 (F.C.)	p-value	C	T	log2 (F.C.)	p-value	C	T	log2 (F.C.)	p-value
DE genes in Nipponbare, IR64, F291, F274-2a, 8391, 8753
LOC_Os01g09030	OS01G0185500	1	4542331	4546541	431.792	7845.69	4.18349	0.00130867	443.831	2578.09	2.53822	0.0321465	469.448	2581.89	2.45939	0.0375212	521.752	6906.59	3.72654	0.00218731	368.371	5426.14	3.8807	0.0020886	213.421	10525.6	5.62406	2.41e-05	Putative uncharacterized protein P0510F03.21 [Source:UniProtKB/TrEMBL;Acc:Q9LGQ4]
LOC_Os01g09540	OS01G0191200	1	4872158	4873806	7823.65	115.172	-6.08598	1.95e-05	7043.47	1110.84	-2.66463	0.0250496	1163.84	37.29	-4.96396	0.00016449	1049.22	152.169	-2.78557	0.0178948	5177.19	179.121	-4.85316	0.000211509	13842.8	199.751	-6.11479	7.17e-06	Os01g0191200 protein; Putative acid phosphatase; cDNA clone:006-301-D10, full insert sequence; cDNA clone:006-302-C11, full insert sequence; cDNA clone:006-302-E06, full insert sequence; cDNA clone:006-308-C05, full insert sequence [Source:UniProtKB/TrEMBL;Acc:Q9LG77]
LOC_Os01g19820	OS01G0303800	1	11245253	11246737	318.703	4282.89	3.7483	0.00819267	35.9441	396.107	3.46206	0.0123512	91.9335	1152.44	3.64796	0.00756054	61.7864	3396.09	5.78044	9.19e-05	93.3429	1090.17	3.54587	0.0100397	364.912	3400.19	3.22	0.0145181	Os01g0303800 protein; Putative ER6 protein; Uncharacterized protein; cDNA clone:006-306-C04, full insert sequence [Source:UniProtKB/TrEMBL;Acc:Q657H4]	qAG1-1, Angaji et al., 2010
LOC_Os01g21120	OS01G0313300	1	11783910	11784899	192.397	12638.2	6.03757	7.34e-06	121.897	1053.7	3.11173	0.0080983	1370.2	10724.7	2.96848	0.0103813	586.971	28112.4	5.58177	1.24e-05	208.355	8052.74	5.27237	4.28e-05	916.568	14226.6	3.9562	0.000887335	Os01g0313300 protein; Putative ethylene response factor 2; cDNA clone:J023075G11, full insert sequence [Source:UniProtKB/TrEMBL;Acc:Q8LQ87]
LOC_Os01g22249	OS01G0326100	1	12517993	12519238	182.116	2852.93	3.96951	0.00303811	14.0651	565.59	5.32957	0.000190569	23.4724	3233.58	7.10602	1.91e-06	11.4419	3252.17	8.15093	1.85e-07	36.6704	10680.9	8.1862	1.47e-07	20.0082	5379.28	8.07068	1.69e-07	Class III peroxidase 13 [Source:UniProtKB/TrEMBL;Acc:Q5U1T0]
LOC_Os01g58290	OS01G0795400	1	33691811	33696348	226.177	2270.07	3.32722	0.0140156	82.8276	1683.21	4.34496	0.0013946	120.296	1222.88	3.34562	0.0101618	113.275	3309.97	4.86892	0.000365414	78.3413	2618.88	5.06303	0.000331998	133.388	7903.81	5.88885	3.95e-05	Os01g0795400 protein [Source:UniProtKB/TrEMBL;Acc:Q0JIK4]	qAG1-2, Angaji et al., 2010
LOC_Os01g65830	OS01G0880800	1	38224446	38225878	55.8098	2968.64	5.73314	8.81e-05	28.1301	511.356	4.18414	0.00216727	141.812	1487.46	3.39079	0.00851941	102.977	3046.92	4.88695	0.00030615	60.0061	4913.48	6.35549	1.59e-05	86.7024	8405.03	6.59904	6.58e-06	Acyl-[acyl-carrier-protein] desaturase 1, chloroplastic [Source:UniProtKB/Swiss-Prot;Acc:Q8LJJ9]	qAG1-2, Angaji et al., 2010
LOC_Os01g67010	OS01G0895200	1	38916092	38917927	4.40604	1296.49	8.20092	6.18e-05	1.56279	73.6042	5.5576	0.00900029	75.3072	1078.45	3.84003	0.0165781	4.57677	1639.65	8.48484	2.03e-05	1.66684	883.253	9.04957	1.9e-05	2.85832	614.733	7.74865	8.54e-05	Os01g0895200 protein [Source:UniProtKB/TrEMBL;Acc:Q0JGZ0]	qAG1-2, Angaji et al., 2010
LOC_Os01g67030	OS01G0895300	1	38924933	38926377	1.46868	2173.2	10.5311	2.44e-07	4.68836	65.8564	3.81217	0.0199015	79.2193	4277.7	5.75484	0.000146921	1.14419	2820.44	11.2674	3.09e-08	2.50025	1712.46	9.41978	3.72e-07	6.66941	1665.82	7.96446	2.7e-06	Membrane protein-like; Os01g0895300 protein [Source:UniProtKB/TrEMBL;Acc:Q5JLU8]	qAG1-2, Angaji et al., 2010
LOC_Os01g68300	OS01G0910900	1	39682842	39683433	2062.03	145.31	-3.82685	0.00883207	4186.7	613.046	-2.77175	0.0359963	1059.19	11.2462	-6.55738	3.01e-05	1985.17	333.829	-2.57209	0.0453718	2976.14	12.3532	-7.91241	2.62e-06	655.508	4.42254	-7.21159	1.14e-05	Os01g0910900 protein; Putative uncharacterized protein P0456E05.39; Putative uncharacterized protein P0470A12.7; Uncharacterized protein; cDNA, clone: J053089D02, full insert sequence [Source:UniProtKB/TrEMBL;Acc:Q5N7Y1]	qAG1-2, Angaji et al., 2010
LOC_Os01g68720	OS01G0915900	1	39918940	39920664	23.4989	392.338	4.06144	0.0371848	1.56279	161.736	6.69337	0.00465548	5.86809	329.691	5.81208	0.00435418	2.28838	346.804	7.24365	0.00112887	10.001	609.939	5.93045	0.00340871	25.7249	1409.32	5.77569	0.00313284	Os01g0915900 protein; Putative uncharacterized protein P0004D12.28; Putative uncharacterized protein P0413C03.2; cDNA, clone: J100024O13, full insert sequence [Source:UniProtKB/TrEMBL;Acc:Q8RZX3]	qAG1-2, Angaji et al., 2010
LOC_Os01g74410	OS01G0975300	1	43096401	43097949	571.316	5055.73	3.14556	0.017009	106.269	947.17	3.1559	0.0131589	103.67	2255.75	4.44354	0.000866272	52.6328	5292.89	6.65195	4.95e-06	50.8385	2201.96	5.43672	0.000113839	247.721	6824.71	4.78398	0.000343489	Putative Myb factor protein; cDNA clone:001-040-C01, full insert sequence; cDNA clone:J013058H19, full insert sequence [Source:UniProtKB/TrEMBL;Acc:Q5JL15]
LOC_Os02g39620	OS02G0609200	2	23904194	23904763	2.93736	434.855	7.20987	0.00109931	0	591.739	Inf	8.53e-05	5.86809	545.737	6.53917	0.00110316	1.14419	562.672	8.94182	0.000134627	0.833418	809.134	9.92312	4.32e-05	0	1000.97	Inf	1.01e-05	Os02g0609200 protein; Putative stress-inducible protein [Source:UniProtKB/TrEMBL;Acc:Q6K1X2]	qAG2-1, Angaji et al., 2010
LOC_Os02g55890	OS02G0802500	2	34210424	34214885	48.4664	6717.65	7.11483	4.95e-07	50.0091	995.594	4.31529	0.000523334	351.108	39258.7	6.80496	5.81e-07	200.234	14000.7	6.12768	2.99e-06	73.3408	6448.37	6.45817	1.96e-06	80.033	9641.87	6.91258	4.02e-07	Os02g0802500 protein; Proton translocating pyrophosphatase; Vacuolar proton pyrophosphatase [Source:UniProtKB/TrEMBL;Acc:Q75U53]
LOC_Os03g01320	OS03G0103300	3	220396	220853	1163.19	6618.09	2.50832	0.0387088	1272.11	6299.94	2.30812	0.0435108	1776.08	30099.6	4.08298	0.000835563	533.194	22424.3	5.39426	2.48e-05	1221.79	61969.8	5.6645	1.79e-05	1722.61	19702.4	3.5157	0.00286368	Retrotransposon protein, putative, Ty1-copia subclass, expressed [Source:UniProtKB/TrEMBL;Acc:Q10T24]
LOC_Os03g03034	OS03G0122300	3	1235460	1244932	387.731	5663.88	3.86866	0.00327051	54.6975	936.517	4.09776	0.00163157	933.027	6268.28	2.74808	0.0238497	552.645	9199.75	4.05717	0.00127187	189.186	1446.87	2.93506	0.0184378	164.83	4112.96	4.64113	0.000359529	Oxidoreductase, 2OG-Fe oxygenase family protein, expressed; cDNA clone:J023093A18, full insert sequence [Source:UniProtKB/TrEMBL;Acc:Q10SI0]
LOC_Os03g08460	OS03G0182800	3	4343807	4345689	679.998	13370.7	4.2974	0.000630903	12.5023	3563.03	8.15477	3.8e-08	80.1973	8889.82	6.79246	6.36e-07	74.3725	30830.2	8.69536	2.82e-09	60.0061	18066.5	8.234	1.53e-08	385.873	28787	6.22115	2.33e-06	AP2 domain containing protein, expressed; Ap2 domain containing protein; Os03g0182800 protein; cDNA clone:J033023E13, full insert sequence [Source:UniProtKB/TrEMBL;Acc:Q7XBH8]
LOC_Os03g12510	OS03G0226200	3	6624980	6626080	1.46868	1164.1	9.63048	8.88e-05	0	250.835	Inf	0.000522453	2.93405	104.767	5.15815	0.0105881	5.72096	648.783	6.82534	0.000785882	0	191.474	Inf	0.000291287	40.0165	1398.26	5.12689	0.00517174	Non-symbiotic hemoglobin 2 [Source:UniProtKB/Swiss-Prot;Acc:O04985]
LOC_Os03g19270	OS03G0305400	3	10839459	10840785	211.49	8738.54	5.36873	5.83e-05	104.707	935.549	3.15946	0.00846336	615.172	5381.01	3.12882	0.00838062	647.613	14565.8	4.49131	0.00028012	115.845	2699.17	4.54225	0.000368167	365.865	16255	5.47343	2.48e-05	Os03g0305400 protein; Universal stress protein family protein, expressed [Source:UniProtKB/TrEMBL;Acc:Q10MK7]
LOC_Os03g19600	OS03G0309300	3	11031736	11032591	63.1532	457.997	2.85841	0.0463124	7.81393	393.202	5.65308	0.000414068	184.845	3444.3	4.21982	0.00286463	24.028	1855.52	6.27096	5.11e-05	30.0031	3434.19	6.83872	1.98e-05	39.0637	3030.91	6.27778	4.67e-05	Retrotransposon protein, putative, Ty3-gypsy subclass, expressed [Source:UniProtKB/TrEMBL;Acc:Q10MG8]
LOC_Os03g45250	OS03G0655100	3	25547399	25548779	36.717	3623.61	6.62484	1.61e-05	14.0651	689.555	5.61548	0.000155142	49.8788	1042.34	4.38526	0.00132968	40.0467	2859.37	6.15787	2.44e-05	24.1691	3428.01	7.14806	3.87e-06	45.7331	7607.5	7.37804	1.56e-06
LOC_Os03g49524	OS03G0702000	3	28193801	28195637	39.6543	734.625	4.21146	0.0269269	6.25114	111.375	4.15516	0.0346611	29.3405	424.396	3.85445	0.0325537	5.72096	738.433	7.01207	0.000749466	23.3357	438.538	4.23209	0.0222277	26.6777	966.325	5.1788	0.00578018	Os03g0702000 protein [Source:UniProtKB/TrEMBL;Acc:Q0DPB7]	qAG3-1, Angaji et al., 2010
LOC_Os03g55680	OS03G0765500	3	31697683	31698949	0	582.857	Inf	8.37e-05	1.56279	145.272	6.53849	0.00360644	4.89008	467.013	6.57746	0.000957841	1.14419	740.793	9.3386	6.19e-05	0.833418	126.62	7.24725	0.00153408	3.81109	2137.56	9.13154	2.56e-05	Putative uncharacterized protein OSJNBa0079B15.19 [Source:UniProtKB/TrEMBL;Acc:Q7Y0B8]
LOC_Os03g61150	OS03G0826800	3	34733490	34734706	23.4989	1448.26	5.94559	0.000202895	6.25114	636.289	6.66942	7.42e-05	77.2632	687.202	3.15288	0.0220749	48.0561	3162.52	6.04021	8.27e-05	8.33418	1789.67	7.74644	5.31e-06	31.4415	4245.64	7.07717	1.11e-05	Expressed protein; Os03g0826800 protein; Putative uncharacterized protein OJ1111_B11.6; Putative uncharacterized protein OSJNBa0010E04.8; cDNA clone:002-174-G12, full insert sequence [Source:UniProtKB/TrEMBL;Acc:Q94GF4]
LOC_Os04g17660	OS04G0249600	4	9671368	9674023	208.552	3057.98	3.8741	0.0038238	56.2603	313.786	2.47959	0.0482299	144.746	4916.96	5.08617	0.000184299	83.526	3998.86	5.58122	5.09e-05	125.846	3344.63	4.73211	0.000476904	74.3163	8963.01	6.91416	2.3e-06	Putative uncharacterized protein [Source:UniProtKB/TrEMBL;Acc:B9FE35]
LOC_Os04g31790	OS04G0387300	4	19020605	19037718	17.6242	853.026	5.59696	0.00175177	4.68836	81.3521	4.11702	0.0237226	69.4391	1036.43	3.89972	0.0143466	46.9119	2133.91	5.5074	0.00107006	11.6679	239.343	4.35847	0.00960016	49.5442	1387.94	4.80808	0.0033081
LOC_Os04g41620	OS04G0493400	4	24687753	24689297	1032.48	4.3055	-7.90572	9.71e-05	431.329	14.5272	-4.89196	0.00494407	619.084	0	-10000000000	3.74e-06	266.597	2.35921	-6.82021	0.000661146	480.049	0	-10000000000	5.88e-05	2292.37	5.89672	-8.60271	1.8e-05
LOC_Os04g56430	OS04G0659300	4	33641298	33642277	33.7796	3043.99	6.49366	5.34e-06	14.0651	1670.62	6.89213	2.05e-06	49.8788	10282.6	7.68756	1.34e-07	49.2003	8166.41	7.37489	2.5e-07	8.33418	12419.6	10.5413	1.75e-10	43.8276	7698.9	7.45667	2.12e-07	DUF26-like protein; OSJNBa0011F23.18 protein; OSJNBa0015K02.5 protein; Os04g0659300 protein; Putative receptor-like protein kinase; Receptor-like protein kinase; cDNA clone:006-211-C11, full insert sequence [Source:UniProtKB/TrEMBL;Acc:Q8S3P3]
LOC_Os05g06920	OS05G0161500	5	3626394	3629080	2862.46	153.921	-4.21699	0.00349133	70.3254	1.93695	-5.18218	0.0021471	166.263	2.95953	-5.81195	0.000205628	139.591	4.71842	-4.88676	0.00139341	2143.55	154.415	-3.79512	0.0052132	11165.5	167.319	-6.06031	3.61e-05	Os05g0161500 protein; Putative uncharacterized protein OSJNBa0034O12.17; cDNA clone:001-015-F09, full insert sequence [Source:UniProtKB/TrEMBL;Acc:Q6ATB2]	qAG5, Jiang et al., 2006
LOC_Os05g37780	OS05G0450300	5	22122842	22123767	1.46868	266.403	7.50294	0.00720294	0	32.9282	Inf	0.0471514	7.82413	160.998	4.36297	0.048703	2.28838	461.226	7.655	0.00285603	0.833418	208.46	7.96651	0.00391529	1.90555	747.409	8.61555	0.00112527	Os05g0450300 protein; Putative uncharacterized protein B1122D01.12; Putative uncharacterized protein OJ1576_F01.3; cDNA clone:J023084G11, full insert sequence [Source:UniProtKB/TrEMBL;Acc:Q60EG7]	qAG5, Jiang et al., 2004
LOC_Os05g39310	OS05G0469600	5	23058815	23061529	133.65	4059.54	4.92479	0.000184788	56.2603	359.305	2.67502	0.0254546	480.206	9204.72	4.26065	0.000603017	259.732	8316.22	5.00083	7.98e-05	255.859	3344.63	3.70842	0.00259861	301.076	23693.7	6.29823	2.94e-06	Pyruvate decarboxylase 1 [Source:UniProtKB/Swiss-Prot;Acc:Q0DHF6]
LOC_Os06g04940	OS06G0141600	6	2175908	2176926	2.93736	1241.06	8.72284	1.4e-05	0	145.272	Inf	0.000349073	10.7582	2070.48	7.58839	2.27e-05	9.15354	2149.24	7.87528	1.32e-05	0.833418	270.226	8.34091	6.03e-05	2.85832	1817.66	9.3127	2.03e-06	Os06g0141600 protein; cDNA clone:006-203-H12, full insert sequence [Source:UniProtKB/TrEMBL;Acc:Q0DEP8]
LOC_Os07g24830	OS07G0429700	7	14118026	14118911	543.411	28903.9	5.73307	3.16e-05	21.879	15956.6	9.51039	2.4e-09	185.823	25606.4	7.10643	6.82e-07	61.7864	55919.2	9.82184	5.86e-10	51.6719	6.1766	-3.0645	0.0361288	1107.12	104374	6.55881	2.26e-06	Os07g0429700 protein; Putative uncharacterized protein OJ1423_A11.14; cDNA, clone: J065048H23, full insert sequence [Source:UniProtKB/TrEMBL;Acc:Q6ZL66]	qAG7, Baltazar et al., 2014
LOC_Os07g32680	OS07G0511100	7	19515060	19516021	26.4362	355.203	3.74806	0.0115328	17.1906	178.2	3.3738	0.0192088	175.065	4623.96	4.72317	0.00105099	29.749	1072.26	5.17167	0.000435605	20.8355	5421.51	8.02351	1.73e-06	17.1499	1278.11	6.21967	5.96e-05	Os07g0511100 protein; Putative glycine-rich cell wall structural protein [Source:UniProtKB/TrEMBL;Acc:Q6Z498]	qAG7.2, Septiningsih et al., 2013
LOC_Os07g32710	OS07G0511400	7	19533865	19534577	108.682	1325.55	3.60841	0.0102901	10.9395	257.615	4.5576	0.00217917	508.568	5314.12	3.38532	0.0109712	34.3258	2445.32	6.15459	3.84e-05	86.6755	4524.36	5.70594	0.000120132	24.7721	1276.64	5.68749	0.000112779		qAG7.2, Septiningsih et al., 2013
LOC_Os07g41350	OS07G0604700	7	24768075	24769065	0	330.985	Inf	0.000523408	0	215.97	Inf	0.000982873	4.89008	71.0286	3.86047	0.0486541	3.43258	629.91	7.51971	0.000606432	2.50025	582.144	7.86316	0.000482681	4.76387	1471.23	8.27068	0.000185746	Os07g0604700 protein; Putative uncharacterized protein OSJNBb0040H10.19; cDNA, clone: J065216A09, full insert sequence [Source:UniProtKB/TrEMBL;Acc:Q6Z4G4]	qAG7-2, Angaji et al., 2010; qAG7.3, Septiningsih et al., 2013
LOC_Os07g44140	OS07G0635500	7	26382584	26384642	167.429	5500.81	5.03802	0.0003077	21.879	189.821	3.11702	0.0183616	936.939	6534.04	2.80195	0.0237957	213.964	5476.91	4.67792	0.000393087	30.0031	2163.35	6.17202	2.09e-05	492.584	3134.84	2.66995	0.0279653	Os07g0635500 protein; Putative cytochrome P450; cDNA clone:001-207-A08, full insert sequence; cDNA clone:J033083C10, full insert sequence [Source:UniProtKB/TrEMBL;Acc:Q8LIR5]	qAG7-2, Angaji et al., 2010
LOC_Os07g47790	OS07G0674800	7	28540698	28541670	7.3434	3982.05	9.08285	8.56e-08	1.56279	169.483	6.76088	0.000159567	51.8348	4437.51	6.41969	1.04e-05	26.3164	4624.06	7.45705	8.91e-07	6.66735	4444.06	9.38055	2.28e-08	12.3861	5664.53	8.8371	4.5e-08	AP2 domain transcription factor EREBP; Os07g0674800 protein [Source:UniProtKB/TrEMBL;Acc:Q6ZDW4]	qAG7, Jiang et al., 2004; qAG7-2, Angaji et al., 2010
LOC_Os08g04210	OS08G0136300	8	2054222	2055830	8.81208	831.499	6.56009	1.38e-05	3.12557	395.139	6.98209	1.43e-05	44.9887	15017.8	8.3829	3.56e-08	11.4419	6360.44	9.11865	7.87e-09	20.002	4377.66	7.77387	2.34e-07	8.57496	8225.18	9.9057	1.22e-09	33-kDa secretory protein; Os08g0136300 protein [Source:UniProtKB/TrEMBL;Acc:Q6ZJX8]
LOC_Os08g08100	OS08G0178600	8	4595778	4597522	16.1555	1674.84	6.69585	7.74e-05	3.12557	236.308	6.24041	0.000496609	8.80214	345.673	5.29541	0.000863713	12.5861	2245.97	7.47936	1.03e-05	6.66735	2371.81	8.47466	2.34e-06	5.71664	3332.38	9.18717	5.27e-07	Putative uncharacterized protein [Source:UniProtKB/TrEMBL;Acc:B9FZC8]
LOC_Os08g40690	OS08G0518900	8	25762457	25763823	8.81208	1098.98	6.96246	6.18e-06	6.25114	204.349	5.03077	0.000620458	85.0874	17534	7.68699	2.48e-07	19.4513	3036.31	7.28631	7.75e-07	7.50076	4533.62	9.23941	1.27e-08	10.4805	4783.71	8.83428	2.19e-08	Chitinase; Os08g0518900 protein [Source:UniProtKB/TrEMBL;Acc:O49825]
LOC_Os09g31000	OS09G0483100	9	18662882	18663545	2.93736	696.414	7.88928	0.000164909	0	54.2347	Inf	0.00585698	4.89008	2036.15	8.70177	1.68e-05	0	659.4	Inf	9.66e-06	1.66684	633.101	8.56918	4.7e-05	3.81109	1368.04	8.48769	2.43e-05	Os09g0483100 protein [Source:UniProtKB/TrEMBL;Acc:Q0J0U5]
LOC_Os09g36680	OS09G0537700	9	21155963	21157945	2401.29	41.4404	-5.85663	1.82e-05	1995.68	35.8336	-5.79942	1.09e-05	814.687	30.7791	-4.72622	0.000174681	2616.77	40.1066	-6.0278	4.71e-06	2575.26	24.7064	-6.70369	1.38e-06	75230	22.8498	-11.6849	9.18e-13	Drought-induced S-like ribonuclease; Os09g0537700 protein; cDNA clone:001-039-G06, full insert sequence; cDNA clone:001-045-B11, full insert sequence; cDNA clone:006-301-A06, full insert sequence; cDNA clone:006-302-G12, full insert sequence; cDNA clone:006-305-E10, full insert sequence; cDNA clone:006-306-E03, full insert sequence; cDNA clone:006-311-C11, full insert sequence; cDNA clone:J013057…
LOC_Os09g36930	OS09G0541000	9	21310132	21311479	3831.78	53.2805	-6.16826	0.000446315	382.882	25.1804	-3.92653	0.0121641	425.437	7.69477	-5.78892	0.000672433	360.421	14.1553	-4.67027	0.00374567	349.202	0	-10000000000	5.15e-05	1505.38	25.7981	-5.86672	0.000427445	Probable aquaporin PIP2-7 [Source:UniProtKB/Swiss-Prot;Acc:Q651D5]
LOC_Os09g38910	OS09G0562600	9	22348739	22351491	30.8423	482.754	3.96831	0.0373232	4.68836	96.8477	4.36856	0.0312424	77.2632	880.755	3.51089	0.0471903	20.5955	502.512	4.60876	0.0123447	8.33418	537.364	6.01071	0.00280894	75.2691	794.583	3.40007	0.0499917	Os09g0562600 protein [Source:UniProtKB/TrEMBL;Acc:Q0IZL6]
LOC_Os10g30150	OS10G0437500	10	15663637	15664570	1.46868	2083.86	10.4705	6.13e-07	0	115.249	Inf	0.00040745	86.0654	675.364	2.97216	0.0342879	45.7677	3630.83	6.30983	7.48e-05	4.16709	857.003	7.68411	1.53e-05	7.62219	2610.03	8.41965	2.09e-06	Os10g0437500 protein; Universal stress protein family protein, expressed; cDNA clone:002-124-E04, full insert sequence [Source:UniProtKB/TrEMBL;Acc:Q7XE49]
LOC_Os10g31420	OS10G0451700	10	16476146	16477079	0	156.074	Inf	0.00494364	0	29.0543	Inf	0.0492608	1.95603	1137.64	9.1839	0.000454054	2.28838	117.961	5.68783	0.016194	5.00051	551.261	6.78452	0.00394088	1.90555	168.056	6.4626	0.00744519	Putative uncharacterized protein [Source:UniProtKB/TrEMBL;Acc:A3C5B2]
LOC_Os10g40510	OS10G0552600	10	21690332	21691088	193.866	34141.5	7.46033	3.59e-07	31.2557	3167.89	6.66326	2.55e-06	343.284	62014.5	7.49706	2.08e-07	113.275	47285.7	8.70543	7.77e-09	115.845	40864.4	8.4625	2.14e-08	90.5135	26458.6	8.19139	3.15e-08	Cortical cell delineating protein, putative, expressed; Os10g0552600 protein; Putative lipid transfer protein [Source:UniProtKB/TrEMBL;Acc:Q9FWP7]
LOC_Os10g40530	OS10G0552800	10	21697077	21697778	439.135	7171.88	4.02961	0.001364	106.269	1401.39	3.72106	0.00214102	951.609	16279.8	4.09657	0.000787241	136.159	12785.8	6.5531	1.16e-06	420.876	15427.6	5.19597	5.84e-05	151.491	6180.5	5.35042	2.93e-05	Cortical cell delineating protein, putative, expressed; Os10g0552800 protein; Putative lipid transfer protein; cDNA clone:001-102-B09, full insert sequence [Source:UniProtKB/TrEMBL;Acc:Q9FWP9]
LOC_Os11g10510	OS11G0210500	11	5745005	5748092	17.6242	5889.92	8.38455	2.82e-07	50.0091	522.977	3.38649	0.0096944	182.889	7165.01	5.29193	0.000142844	41.1909	2939.58	6.15714	1.93e-05	37.5038	2447.48	6.02811	3.55e-05	41.922	2503.89	5.90032	3.54e-05	Alcohol dehydrogenase 2 [Source:UniProtKB/Swiss-Prot;Acc:Q0ITW7]
LOC_Os11g42500	OS11G0644700	11	25594109	25594874	16835.5	375.655	-5.48595	4.31e-05	14543.3	809.647	-4.16692	0.00060264	3927.71	61.5581	-5.9956	5.64e-06	3498.94	322.032	-3.44164	0.00298528	13862.2	205.372	-6.07678	4.63e-06	30671.7	260.193	-6.88118	3.91e-07	Dirigent-like protein, expressed; Os11g0644750 protein [Source:UniProtKB/TrEMBL;Acc:Q2R0I1]	qAG11, Jiang et al., 2006; qAG11, Baltazar et al., 2014
LOC_Os11g47500	OS11G0700900	11	28722579	28724062	5.87472	369.196	5.97372	0.00263229	7.81393	114.28	3.87038	0.0328045	9.78016	1554.93	7.31278	0.000191235	4.57677	710.123	7.2776	0.000259245	2.50025	838.473	8.38955	7.65e-05	5.71664	1024.55	7.48561	0.000160752	Chitinase; Chitinase III C10923-rice; Xylanase inhibitor protein 1, putative, expressed; cDNA clone:J033068O15, full insert sequence [Source:UniProtKB/TrEMBL;Acc:O49830]
LOC_Os11g47570	OS11G0701600	11	28748102	28748484	27.9049	1126.43	5.33509	0.000605791	6.25114	99.7531	3.99617	0.0116268	94.8675	6624.6	6.12578	7.13e-05	9.15354	1886.19	7.68693	4.42e-06	6.66735	2195.78	8.3634	1.53e-06	5.71664	499.01	6.44776	6.99e-05	Os11g0701600 protein [Source:UniProtKB/TrEMBL;Acc:Q0IQX7]
LOC_Os11g47600	OS11G0702100	11	28758837	28760003	1.46868	431.088	8.19732	0.000577848	3.12557	116.217	5.21656	0.012218	62.593	1960.98	4.96943	0.0064224	1.14419	547.337	8.90196	0.000146788	1.66684	613.027	8.52269	0.000156048	1.90555	178.376	6.54857	0.00193587	Chitinase III C10701-rice; Os11g0702100 protein; Xylanase inhibitor protein 1, putative, expressed [Source:UniProtKB/TrEMBL;Acc:Q53NL9]
LOC_Os12g09540	OS12G0197100	12	5013789	5018308	80.7774	1376.14	4.09054	0.00872792	28.1301	258.583	3.20044	0.031771	50.8568	808.542	3.99081	0.00780124	86.9586	1435.58	4.04516	0.00604148	25.0025	545.085	4.44633	0.00424556	48.5914	3817.39	6.29574	0.000117039	Os12g0197100 protein; Phosphoribosylamine-glycine ligase, chloroplast, putative, expressed; cDNA clone:J023114O15, full insert sequence [Source:UniProtKB/TrEMBL;Acc:Q2QWF3]
LOC_Os12g35610	OS12G0541300	12	21648123	21653555	114.557	8244.49	6.16929	1.46e-05	64.0742	457.121	2.83476	0.0216443	162.351	2540.46	3.9679	0.00175573	115.563	6319.15	5.77297	2.07e-05	123.346	4041.04	5.03394	0.000172804	116.238	10418.8	6.48595	3.74e-06	Respiratory burst oxidase, putative, expressed [Source:UniProtKB/TrEMBL;Acc:Q2QP56]	qAG12, Septiningsih et al., 2013
LOC_Os12g38770	OS12G0576750	12	23819296	23822341	27.9049	565.096	4.33991	0.0190413	6.25114	140.429	4.48958	0.0188539	9.78016	881.347	6.49371	0.000889733	12.5861	766.744	5.92884	0.00167905	6.66735	668.616	6.64792	0.00084235	20.961	1020.13	5.6049	0.00240825		qAG12, Septiningsih et al., 2013
DE genes in Nipponbare, IR64, F291,F274-2a, 8391
LOC_Os01g71860	OS01G0947000	1	41629302	41631696	17.6242	813.201	5.52799	0.00455229	0	635.321	Inf	7.21e-05	7.82413	797.888	6.67211	0.000814152	3.43258	1010.92	8.20216	0.000135083	4.16709	693.323	7.37834	0.000403132	1.90555	0.73709	-1.37029	0.870971	Os01g0947000 protein; Putative endo-1,3-beta-glucanase; Uncharacterized protein; cDNA clone:001-123-F10, full insert sequence [Source:UniProtKB/TrEMBL;Acc:Q8GT15]
LOC_Os04g25060	OS04G0316200	4	14453617	14454811	49.9351	939.674	4.23404	0.0144617	7.81393	88.1314	3.49554	0.047534	34.2306	1817.15	5.73025	0.0011965	14.8745	294.902	4.30932	0.010228	18.3352	1937.91	6.72374	0.00030544	3.81109	10.3193	1.43706	0.469876	Os04g0316200 protein [Source:UniProtKB/TrEMBL;Acc:Q0JE78]
LOC_Os04g52260	OS04G0612500	4	31061682	31062694	1442.24	8692.8	2.59151	0.0379928	253.171	1495.33	2.56228	0.031337	1599.06	8839.51	2.46675	0.0369239	535.482	9454.54	4.1421	0.00084249	505.052	2844.32	2.49358	0.037915	865.118	1172.71	0.438877	0.693568	Putative uncharacterized protein [Source:UniProtKB/TrEMBL;Acc:B9FCG2]
DE genes in Nipponbare, IR64, F291, F274-2a, 8753
LOC_Os06g04920	OS06G0141200	6	2162738	2165150	563.973	64.5824	-3.12641	0.0428664	2248.85	174.326	-3.68933	0.012227	756.984	29.5953	-4.67683	0.00247222	1107.58	43.6454	-4.66543	0.00218652	1476.82	257.873	-2.51776	0.0785256	1709.28	125.305	-3.76987	0.00972402	Os06g0141200 protein; Putative zinc finger transcription factor ZFP30; cDNA clone:006-211-B04, full insert sequence; cDNA clone:J013154B21, full insert sequence [Source:UniProtKB/TrEMBL;Acc:Q9SNS0]
LOC_Os07g25050	OS07G0432201	7	14292161	14292961	212.958	6670.29	4.96911	0.00015242	0	1898.21	Inf	1.61e-09	46.9448	3166.69	6.07587	6.69e-06	18.3071	11517.7	9.29723	1.46e-09	17.5018	4.63245	-1.91766	0.247618	445.898	29391.5	6.04254	5.31e-06	Putative uncharacterized protein OSJNBa0067K15.33; cDNA, clone: J100045I04, full insert sequence [Source:UniProtKB/TrEMBL;Acc:Q6YTM0]	qAG7, Baltazar et al., 2014
LOC_Os07g41340	OS07G0604600	7	24765682	24766713	0	383.189	Inf	0.00384675	0	53.2662	Inf	0.0367274	0	181.123	Inf	0.00476596	0	444.712	Inf	0.00174171	0	0	NA	NA	0	257.244	Inf	0.00280084	Putative uncharacterized protein OSJNBb0040H10.18; cDNA clone:001-107-G08, full insert sequence [Source:UniProtKB/TrEMBL;Acc:Q6Z4G5]	qAG7-2, Angaji et al., 2010; qAG7.3, Septiningsih et al., 2013
LOC_Os10g26940	OS10G0409400	10	14171332	14172873	531.662	3607.47	2.76241	0.0278277	256.297	4214.81	4.03958	0.00131473	497.81	4368.85	3.13359	0.00971559	1383.33	11272.3	3.02657	0.0104134	88.3423	381.405	2.11015	0.0793617	222.949	10448.2	5.5504	3e-05	BURP domain-containing protein 16 [Source:UniProtKB/Swiss-Prot;Acc:Q7XES5]
LOC_Os11g47510	OS11G0701000	11	28727508	28728821	1.46868	1132.88	9.59126	9.66e-06	1.56279	33.8967	4.43895	0.035697	85.0874	4102.49	5.59141	0.00065797	11.4419	1441.48	6.97708	7.28e-05	2.50025	3.0883	0.304737	1	10.4805	379.601	5.1787	0.0016236	Glycosyl hydrolases family 18; Os11g0701000 protein; Xylanase inhibitor protein 1, putative, expressed; cDNA clone:J033125A18, full insert sequence [Source:UniProtKB/TrEMBL;Acc:Q53NL1]
LOC_Os12g43450	OS12G0630200	12	26960487	26961383	118.963	0.538187	-7.78819	0.00936094	664.184	21.3065	-4.96222	0.0341591	290.471	0.591905	-8.93881	0.00251318	41.1909	0	-10000000000	0.0294891	23.3357	0	-10000000000	0.0900415	316.321	2.94836	-6.74533	0.00862319	Os12g0630200 protein; P21 protein, putative, expressed [Source:UniProtKB/TrEMBL;Acc:Q2QLS7]
DE genes in Nipponbare, IR64, F291, 8391,8753
LOC_Os03g22010	OS03G0339300	3	12611816	12617140	4325.26	9.68737	-8.80247	1.34e-07	6402.73	820.3	-2.96446	0.0191086	318.833	2.95953	-6.75129	1.71e-05	370.718	80.2132	-2.20841	0.0707873	2270.23	7.72074	-8.19988	6.26e-07	6924.76	28.0094	-7.94971	3.31e-07	Os03g0339300 protein; Peroxidase 2, putative, expressed; cDNA clone:001-207-D07, full insert sequence; cDNA clone:006-202-C06, full insert sequence; cDNA clone:006-301-D07, full insert sequence; cDNA clone:006-302-C02, full insert sequence; cDNA clone:006-302-G09, full insert sequence; cDNA clone:006-306-H05, full insert sequence; cDNA clone:006-310-G05, full insert sequence; cDNA clone:J013094O1…
LOC_Os04g41640	OS04G0493600	4	24692701	24693326	743.152	12.3783	-5.90777	0.00625393	614.175	30.9913	-4.30872	0.026572	465.536	1.77572	-8.03435	0.000612466	41.1909	16.5145	-1.31859	0.476542	105.844	1.54415	-6.09899	0.0134476	758.407	4.42254	-7.42195	0.000863845	Os04g0493600 protein [Source:UniProtKB/TrEMBL;Acc:Q0JC38]
LOC_Os05g12640	OS05G0217800	5	7255510	7257163	6515.06	886.932	-2.87688	0.0416605	395.385	29.0543	-3.76643	0.00697858	905.643	7.10286	-6.9944	1.32e-05	1835.28	753.768	-1.28381	0.296191	1574.33	84.9282	-4.21235	0.00289415	1482.52	4.42254	-8.38896	8.65e-07	BURP domain-containing protein 2 [Source:UniProtKB/Swiss-Prot;Acc:Q6I5W0]	qAG5, Jiang et al., 2006
LOC_Os06g04990	OS06G0142200	6	2199361	2200466	85.1834	10945.6	7.00557	6.12e-07	160.967	860.976	2.41921	0.0351235	1270.44	7141.93	2.49098	0.0290867	2913.11	12624.1	2.11555	0.0543785	226.69	7242.06	4.99761	8.92e-05	289.643	29701.8	6.68013	7.21e-07	Early nodulin; Os06g0142200 protein; Putative early nodulin; cDNA clone:J033147G13, full insert sequence [Source:UniProtKB/TrEMBL;Acc:O82787]
LOC_Os11g18730	OS11G0291500	11	10614686	10615884	4032.99	506.434	-2.9934	0.0257354	5247.83	900.683	-2.54263	0.0396701	1970.7	34.3305	-5.84307	4.13e-05	934.805	588.623	-0.667321	0.563207	4202.1	182.21	-4.52744	0.000787086	4503.76	233.657	-4.26866	0.00110038	Os11g0291500 protein [Source:UniProtKB/TrEMBL;Acc:Q0IT92]
LOC_Os11g42550	OS11G0645400	11	25617774	25618559	7477.05	398.797	-4.22874	0.00190169	6277.71	1129.24	-2.47488	0.04	2624.02	46.1686	-5.82872	2.76e-05	1640.77	415.221	-1.98242	0.0876194	7759.12	242.431	-5.00025	0.000195435	1678.79	10.3193	-7.34594	8.73e-07	Dirigent-like protein, expressed; Os11g0645300 protein; cDNA clone:001-045-D09, full insert sequence; cDNA clone:J013049N05, full insert sequence [Source:UniProtKB/TrEMBL;Acc:Q2R0H3]	qAG11, Jiang et al., 2006; qAG11, Baltazar et al., 2014
DE genes in Nipponbare, IR64, F274-2a, 8391, 8753
LOC_Os01g45720	OS01G0644900	1	25957753	25958568	11.7494	1452.03	6.94933	0.0010008	3.12557	89.0999	4.83323	0.0225419	55.7469	576.516	3.3704	0.0552856	4.57677	714.841	7.28715	0.000568812	1.66684	296.477	7.47466	0.000859535	13.3388	344.221	4.68963	0.0116376	Os01g0644900 protein; Putative uncharacterized protein P0707D10.18 [Source:UniProtKB/TrEMBL;Acc:Q5VRC1]	qAG1-2, Angaji et al., 2010
LOC_Os01g51570	OS01G0713200	1	29620958	29622314	145.399	1218.99	3.0676	0.0243039	15.6279	760.254	5.60429	0.000164517	1451.38	3500.53	1.27015	0.302692	112.131	2959.63	4.72216	0.000558271	33.3367	3352.35	6.65192	1.27e-05	151.491	4676.83	4.94823	0.000352503	Beta-1,3-glucanase; Os01g0713200 protein; Uncharacterized protein; cDNA clone:001-034-G03, full insert sequence; cDNA clone:006-301-D12, full insert sequence; cDNA clone:006-308-D11, full insert sequence [Source:UniProtKB/TrEMBL;Acc:Q7F354]	qAG1-2, Angaji et al., 2010
LOC_Os01g56810	OS01G0775400	1	32788488	32792747	102.808	1100.59	3.42026	0.0300311	20.3162	401.918	4.3062	0.0071381	706.127	1037.02	0.55444	0.695233	216.252	1586.57	2.87512	0.0455909	25.0025	943.475	5.23784	0.0014689	121.955	944.949	2.95389	0.0421834	Cytokinin dehydrogenase 5 [Source:UniProtKB/Swiss-Prot;Acc:Q5ZAY9]	qAG1-2, Angaji et al., 2010
LOC_Os02g26810	OS02G0467600	2	15734828	15736855	32.3109	1435.34	5.47323	0.00134209	1.56279	88.1314	5.81746	0.00462611	229.834	1285.62	2.4838	0.0894219	13.7303	304.338	4.47024	0.00522687	0.833418	1457.68	10.7723	1.15e-06	81.9385	2024.05	4.62656	0.00321789	Os02g0467600 protein; Putative cinnamate 4-hydroxylase [Source:UniProtKB/TrEMBL;Acc:Q6K7B1]
LOC_Os02g49720	OS02G0730000	2	30392547	30396729	894.426	10116.8	3.49965	0.00435697	631.365	3490.39	2.46684	0.0303365	3250.92	10241.7	1.65554	0.137413	2955.45	27535.5	3.21985	0.00497943	552.556	3982.36	2.84943	0.0149652	799.377	13119.5	4.03669	0.000728365	Mitochondrial aldehyde dehydrogenase ALDH2a; Os02g0730000 protein; Putative mitochondrial aldehyde dehydrogenase ALDH2a; cDNA clone:J033042M19, full insert sequence [Source:UniProtKB/TrEMBL;Acc:Q9LRI6]
LOC_Os03g58890	OS03G0803500	3	33522573	33524525	38.1857	2382.55	5.96333	0.000247564	42.1952	534.599	3.66331	0.0118364	152.57	520.877	1.77147	0.190303	131.582	1475.69	3.48735	0.0125683	68.3403	1686.21	4.6249	0.002173	106.711	3100.2	4.86059	0.0011021	Os03g0803500 protein; Oxidoreductase, 2OG-Fe oxygenase family protein, putative, expressed; Putative oxidoreductase; cDNA clone:006-203-E11, full insert sequence [Source:UniProtKB/TrEMBL;Acc:Q84T04]
LOC_Os04g59150	OS04G0688100	4	35187443	35189187	859.177	14015.5	4.02792	0.00121567	356.315	1760.69	2.30492	0.042099	12870.7	18093.4	0.491371	0.655839	1487.45	15053	3.33913	0.0037093	910.093	15674.7	4.10628	0.000795959	475.434	9334.5	4.29526	0.000372973	OSJNBa0039K24.4 protein; Os04g0688100 protein; cDNA clone:001-042-B05, full insert sequence; cDNA clone:J033090B01, full insert sequence [Source:UniProtKB/TrEMBL;Acc:Q7XSV2]
LOC_Os06g05690	OS06G0149700	6	2574179	2576676	14.6868	300.308	4.35385	0.0110392	4.68836	248.899	5.73033	0.00178056	50.8568	400.128	2.97595	0.0504298	9.15354	519.027	5.82534	0.000744378	5.00051	2002.76	8.6457	9.76e-06	12.3861	2898.97	7.87068	2.12e-05	Cysteine synthase; Os06g0149700 protein [Source:UniProtKB/TrEMBL;Acc:Q5VND3]
LOC_Os06g35480	OS06G0546500	6	20676206	20677666	24.9675	513.43	4.36204	0.0118807	4.68836	95.8792	4.35406	0.0181321	180.933	1316.4	2.86307	0.0642383	43.4793	1245.66	4.84044	0.00349047	111.678	1230.69	3.46205	0.0306361	13.3388	802.691	5.91114	0.000798528	Class III peroxidase 88; Os06g0546500 protein; Putative bacterial-induced peroxidase; cDNA clone:J033068K09, full insert sequence [Source:UniProtKB/TrEMBL;Acc:Q5Z7K0]
LOC_Os07g03279	OS07G0124900	7	1319034	1319789	234.989	7336.57	4.96444	0.000314664	6.25114	248.899	5.31529	0.000373291	238.636	525.612	1.13919	0.337457	72.0841	4127.44	5.83942	2.46e-05	22.5023	7989.43	8.47188	7.34e-08	115.286	6447.32	5.80542	2.67e-05	Os07g0124900 protein; Putative pathogenesis-related protein [Source:UniProtKB/TrEMBL;Acc:Q84J76]
LOC_Os07g14740	OS07G0251200	7	8406702	8407084	145.399	1223.3	3.07269	0.0490871	32.8185	417.414	3.6689	0.0176773	2826.47	1074.9	-1.3948	0.320401	24.028	279.567	3.5404	0.0193481	20.8355	477.142	4.51731	0.00498028	24.7721	661.907	4.73984	0.00278572		qAG7.1, Septiningsih et al., 2013; qAG7, Baltazar et al., 2014
LOC_Os07g35370	OS07G0538200	7	21155455	21158796	102.808	871.863	3.08416	0.0466748	35.9441	332.188	3.20817	0.0332844	251.35	1069.57	2.08926	0.142017	70.9399	1350.65	4.25091	0.00507213	16.6684	1395.91	6.38795	0.000191144	201.988	1924.54	3.25217	0.0252227	Os07g0538200 protein; Putative serine/threonine-specific protein kinase; cDNA clone:J033088G15, full insert sequence; cDNA clone:J033131H17, full insert sequence [Source:UniProtKB/TrEMBL;Acc:Q6YVV8]
LOC_Os10g28350	OS10G0419400	10	14751991	14754323	35.2483	1539.75	5.449	0.000399351	131.274	801.899	2.61084	0.0497343	354.042	1862.73	2.39542	0.068305	320.374	2556.21	2.99618	0.02238	46.6714	2835.06	5.92469	0.000109049	32.3943	3095.78	6.57842	2.3e-05	1,2-dihydroxy-3-keto-5-methylthiopentene dioxygenase 1 [Source:UniProtKB/Swiss-Prot;Acc:A1L4T4]
LOC_Os11g04409	OS11G0139700	11	1835867	1837930	2643.62	28821.5	3.44656	0.00634393	559.477	4529.57	3.01722	0.011655	8268.15	37129.6	2.16693	0.0624162	3861.65	48881.7	3.66201	0.0023598	872.589	22712.9	4.70206	0.000281185	5768.09	50349.9	3.12582	0.00823328	Putative uncharacterized protein [Source:UniProtKB/TrEMBL;Acc:Q2RAS5]
43 DE genes in tolerant genotypes (Nipponbare, F291, F274-2a, 8391, 8753) but not in sensitive genotype (IR64)
LOC_Os01g13690	OS01G0238500	1	7665423	7668089	3072.48	92.5682	-5.05274	0.00100823	832.965	204.349	-2.02722	0.121551	1386.83	51.4957	-4.75119	0.00108691	1203.69	96.7277	-3.63739	0.0076341	1639.33	138.973	-3.56023	0.0107158	4153.14	113.512	-5.19329	0.000380592	Branched-chain amino acid aminotransferase-like; Os01g0238500 protein [Source:UniProtKB/TrEMBL;Acc:Q5NAM3]
LOC_Os01g45274	OS01G0639900	1	25696671	25705077	26552.3	2872.84	-3.20828	0.0100656	3922.59	1913.71	-1.03543	0.344231	6719.95	990.257	-2.76257	0.0165405	9454.46	1853.16	-2.35101	0.0338162	15126.5	2504.61	-2.59442	0.0247318	41208.4	1740.27	-4.56556	0.000189905	Carbonic anhydrase [Source:UniProtKB/TrEMBL;Acc:Q7F2G3]	qAG1-2, Angaji et al., 2010
LOC_Os01g46120	OS01G0649900	1	26222617	26225117	1412.87	67.2734	-4.39245	0.00968446	909.541	378.674	-1.26418	0.381911	278.734	8.87858	-4.97242	0.00321539	328.383	17.6941	-4.21404	0.00895208	945.93	30.883	-4.93685	0.00332351	1710.23	37.5916	-5.50764	0.00101851	Lipase-like; Os01g0649900 protein; Uncharacterized protein [Source:UniProtKB/TrEMBL;Acc:Q8RZ61]	qAG1-2, Angaji et al., 2010
LOC_Os01g70520	OS01G0930800	1	40842288	40848191	1031.01	11.3019	-6.51135	0.000410844	1594.04	491.018	-1.69884	0.24453	145.724	1.77572	-6.3587	0.000761702	244.857	5.89803	-5.37556	0.00218339	699.238	0	-10000000000	1.41e-05	1879.82	4.42254	-8.73151	8.4e-06	Beta-glucosidase 5 [Source:UniProtKB/Swiss-Prot;Acc:Q5JK35]
LOC_Os02g02400	OS02G0115700	2	825041	827640	29848	354.127	-6.39722	4.27e-06	20052.1	6579.83	-1.60763	0.148059	8226.09	23.6762	-8.44063	9.49e-09	3540.13	96.7277	-5.19373	4.03e-05	19337.8	69.4867	-8.12047	2.3e-08	39775.4	65.601	-9.24394	7.5e-10	Catalase isozyme A [Source:UniProtKB/Swiss-Prot;Acc:Q0E4K1]
LOC_Os02g18650	OS02G0288100	2	10864069	10867222	1.46868	199.667	7.08694	0.00210762	0	8.71629	Inf	0.174507	10.7582	1991.76	7.53247	0.000171144	5.72096	559.133	6.61079	0.000745368	15.0015	1083.99	6.1751	0.0011938	2.85832	450.362	7.29977	0.00038642	Pectinesterase [Source:UniProtKB/TrEMBL;Acc:Q6K8B0]
LOC_Os02g20540	OS02G0308400	2	12113907	12114966	2900.64	59.7388	-5.60156	0.000183484	5930.77	1950.51	-1.60437	0.191532	742.314	11.8381	-5.97052	5.64e-05	661.343	73.1356	-3.17675	0.0132495	3344.51	18.5298	-7.4958	2.37e-06	3126.05	55.2817	-5.82139	5.26e-05	Os02g0308400 protein; Putative fasciclin-like arabinogalactan-protein; cDNA clone:006-209-H01, full insert sequence; cDNA clone:006-302-B07, full insert sequence; cDNA clone:006-306-F07, full insert sequence; cDNA clone:006-310-C03, full insert sequence; cDNA clone:006-311-C06, full insert sequence [Source:UniProtKB/TrEMBL;Acc:Q6Z0W5]
LOC_Os02g30080	OS02G0503700	2	17862192	17866853	299.611	11.3019	-4.72845	0.0143038	1367.44	364.147	-1.90888	0.240894	274.822	1.77572	-7.27396	0.000621263	195.657	7.07764	-4.78891	0.0107071	680.903	6.1766	-6.78449	0.00105972	650.744	14.7418	-5.46411	0.00342233		qAG2.2, Baltazar et al., 2014
LOC_Os02g38920	OS02G0601300	2	23527139	23530459	1797.66	14827.6	3.04409	0.0131426	1473.71	4456.93	1.5966	0.155907	2321.81	47214.5	4.34591	0.000448753	1620.18	29126.8	4.16813	0.000575715	589.227	18656.4	4.9847	0.000107361	1848.38	37627	4.34743	0.000389159	Glyceraldehyde-3-phosphate dehydrogenase 3, cytosolic [Source:UniProtKB/Swiss-Prot;Acc:Q6K5G8]	qAG2-1, Angaji et al., 2010
LOC_Os03g13300	OS03G0236200	3	7181080	7184036	20.5615	3925	7.5766	1.39e-06	145.339	445.499	1.616	0.184843	934.005	6002.51	2.68406	0.0304061	286.048	5561.84	4.28123	0.000995526	21.6689	1337.23	5.94748	4.08e-05	657.414	4501.41	2.7755	0.0233763	Glutamate decarboxylase; Glutamate decarboxylase, putative, expressed; Os03g0236200 protein [Source:UniProtKB/TrEMBL;Acc:Q84U04]
LOC_Os03g27190	OS03G0389100	3	15567899	15572135	424.448	22.0657	-4.26571	0.0322876	659.496	213.065	-1.63007	0.340824	497.81	7.69477	-6.01557	0.00328074	312.364	3.53882	-6.46382	0.00270242	413.375	4.63245	-6.47953	0.0031356	551.656	1.47418	-8.54771	0.000272206	ICE-like protease p20 domain containing protein, expressed; Os03g0389100 protein; Putative metacaspase; cDNA clone:001-110-G09, full insert sequence [Source:UniProtKB/TrEMBL;Acc:Q75LQ8]
LOC_Os03g31750	OS03G0432100	3	18153151	18160127	105.745	4573.51	5.43464	4.21e-05	182.846	774.781	2.08316	0.0679212	290.471	24203	6.38065	2.08e-06	343.258	10946.7	4.99507	6.51e-05	141.681	10701	6.23895	3.75e-06	116.238	12764.9	6.77895	6.36e-07		qAG3, Baltazar et al., 2014
LOC_Os03g45619	OS03G0658800	3	25746127	25760738	28022.4	41.9786	-9.38271	1.53e-09	9042.28	2339.84	-1.95028	0.082639	276.778	6.51096	-5.40972	5.72e-05	375.295	18.8737	-4.31358	0.000585933	3362.01	32.4271	-6.69598	1.4e-06	24291.9	2.94836	-13.0083	1.48e-13	Cytochrome P450 family protein, expressed; Os03g0658800 protein; cDNA clone:J013002I04, full insert sequence [Source:UniProtKB/TrEMBL;Acc:Q10FR4]
LOC_Os03g57490	OS03G0788700	3	32780139	32782701	11.7494	455.844	5.27788	0.00738345	18.7534	49.3923	1.39713	0.432167	58.6809	1503.44	4.67923	0.00959139	16.0187	933.068	5.86415	0.00201711	5.83393	237.799	5.34913	0.0059499	21.9138	574.93	4.71348	0.00903484	Beta-Ig-H3 domain-containing protein, putative, expressed; Expressed protein; Os03g0788700 protein; cDNA clone:J033067C09, full insert sequence [Source:UniProtKB/TrEMBL;Acc:Q6F3A1]
LOC_Os04g25650	OS04G0322100	4	14863727	14864824	35.2483	795.44	4.49613	0.00457048	21.879	68.7619	1.65206	0.265624	32.2745	1987.03	5.94407	0.000238574	11.4419	335.008	4.87179	0.0019165	65.84	4827.01	6.19602	0.000156605	52.4025	706.132	3.75223	0.0100044	OSJNBb0062H02.10 protein; Os04g0322100 protein; cDNA, clone: J100048J12, full insert sequence [Source:UniProtKB/TrEMBL;Acc:Q7XW32]
LOC_Os04g54220	OS04G0634900	4	32296094	32296600	16.1555	995.108	5.94476	0.00180933	1.56279	27.1174	4.11702	0.073233	3.91206	393.025	6.65055	0.00073498	3.43258	896.501	8.02887	0.000100161	2.50025	461.701	7.52874	0.00026937	10.4805	1867.79	7.47748	0.000128964	OSJNBa0043L09.17 protein; Os04g0634900 protein [Source:UniProtKB/TrEMBL;Acc:Q7XQT0]
LOC_Os04g56230	OS04G0657300	4	33524754	33525163	274.643	4.3055	-5.99523	0.0333723	51.5719	22.275	-1.21116	0.611164	42.0547	0	-10000000000	0.0218691	101.833	1.17961	-6.43176	0.0334746	167.517	3.0883	-5.76135	0.045142	335.376	2.94836	-6.82972	0.0148569
LOC_Os05g10650	OS05G0194900	5	5814320	5815467	20.5615	932.14	5.50253	0.00387755	9.37671	30.0228	1.6789	0.368247	85.0874	1325.87	3.96185	0.0205864	17.1629	500.153	4.86501	0.0062825	6.66735	335.08	5.65125	0.0030638	53.3553	989.912	4.2136	0.0137766	Os05g0194900 protein [Source:UniProtKB/TrEMBL;Acc:Q0DK50]	qAG5, Jiang et al., 2006
LOC_Os05g12400	OS05G0215000	5	7134027	7135550	3436.71	72.6552	-5.56382	0.00103968	1045.5	147.208	-2.82827	0.0524785	212.229	0.591905	-8.48604	4.51e-05	155.61	14.1553	-3.45852	0.0236821	860.921	12.3532	-6.12293	0.000395485	1563.5	4.42254	-8.46569	6.08e-06	BURP domain-containing protein 1 [Source:UniProtKB/Swiss-Prot;Acc:Q6I5B3]	qAG5, Jiang et al., 2006
LOC_Os05g12630	OS05G0217700	5	7249980	7251356	3188.5	32.2912	-6.62559	0.000104928	42.1952	4.84238	-3.12329	0.0555178	44.0107	2.36762	-4.21634	0.0114746	133.87	16.5145	-3.01903	0.0379736	5267.2	197.651	-4.73601	0.00194408	311.557	2.21127	-7.13848	6.57e-05	BURP domain-containing protein 7 [Source:UniProtKB/Swiss-Prot;Acc:Q60E34]	qAG5, Jiang et al., 2006
LOC_Os05g13970	OS05G0228000	5	7775450	7780974	4.40604	314.839	6.15899	0.0127057	0	16.4641	Inf	0.10884	4.89008	469.973	6.58658	0.0055226	2.28838	179.3	6.2919	0.00981211	0.833418	495.672	9.21613	0.000939576	10.4805	524.808	5.64601	0.0112588	Os05g0228000 protein; Putative uncharacterized protein OJ1212_C10.15; cDNA clone:J033055L05, full insert sequence [Source:UniProtKB/TrEMBL;Acc:Q6AVB5]	qAG5, Jiang et al., 2006
LOC_Os06g03520	OS06G0125200	6	1361368	1362505	19.0928	1286.81	6.07462	0.000157941	34.3813	151.082	2.13564	0.120218	268.954	2014.25	2.90481	0.0315111	184.215	1328.24	2.85005	0.0309961	10.8344	3540.73	8.35228	1.25e-06	32.3943	3689.13	6.8314	1.67e-05	Os06g0125200 protein; cDNA clone:J033087E11, full insert sequence [Source:UniProtKB/TrEMBL;Acc:Q0DF11]
LOC_Os06g05020	OS06G0142400	6	2212615	2213482	23.4989	8403.79	8.48231	5.97e-08	34.3813	126.87	1.88366	0.12803	237.658	1702.32	2.84054	0.0187844	397.035	3573.03	3.16981	0.00812587	16.6684	5651.58	8.4054	5.3e-08	33.3471	14348.9	8.74917	1.34e-08	Os06g0142400 protein; Putative early nodulin; cDNA, clone: J065127G01, full insert sequence [Source:UniProtKB/TrEMBL;Acc:Q9SNQ9]
LOC_Os06g49340	OS06G0707300	6	29891030	29892905	0	410.637	Inf	0.00110834	4.68836	17.4326	1.89463	0.436416	11.7362	363.43	4.95264	0.0211342	4.57677	403.425	6.46183	0.00514798	1.66684	69.4867	5.38155	0.0259543	0.952773	907.357	9.89532	0.000311449	Os06g0707300 protein; Putative uncharacterized protein P0018H04.37; Putative uncharacterized protein P0621D05.25; cDNA clone:J033041C08, full insert sequence [Source:UniProtKB/TrEMBL;Acc:Q5Z8T5]
LOC_Os07g01560	OS07G0106200	7	349201	353686	204.146	7144.97	5.12925	0.000294217	70.3254	229.529	1.70656	0.171845	411.745	4852.44	3.55889	0.00585489	156.754	3700.42	4.56111	0.000604731	39.1707	2709.98	6.11237	2.86e-05	212.468	2318.15	3.44765	0.00665775	Os07g0106200 protein; Putative monosaccharide transport protein MST1; cDNA clone:J033117G08, full insert sequence [Source:UniProtKB/TrEMBL;Acc:Q7EZD7]
LOC_Os07g04990	OS07G0142900	7	2193809	2196930	722.59	30.1385	-4.5835	0.00981743	367.255	80.3836	-2.19181	0.156459	297.317	18.941	-3.97242	0.0166543	409.621	27.1309	-3.91628	0.0163477	402.541	38.6037	-3.38232	0.0398686	2777.33	33.169	-6.38772	0.000389138	Aldo/keto reductase family-like protein; Os07g0142900 protein [Source:UniProtKB/TrEMBL;Acc:Q8H4J8]
LOC_Os07g09630	OS07G0194500	7	5116681	5119153	20.5615	888.009	5.43256	0.00467283	15.6279	55.2032	1.82063	0.300434	19.5603	339.162	4.11597	0.0198243	36.6142	747.87	4.35231	0.0123311	19.1686	274.858	3.84187	0.0298845	20.0082	1688.67	6.39915	0.000801574	Os07g0194500 protein; cDNA clone:J033098K22, full insert sequence [Source:UniProtKB/TrEMBL;Acc:Q0D7Z6]	qAG7, Baltazar et al., 2014
LOC_Os07g34570	OS07G0529600	7	20724581	20726069	21679.2	2218.41	-3.28871	0.00837302	9625.2	3339.31	-1.52727	0.166722	5839.73	39.0657	-7.22385	2.1e-07	4565.33	208.79	-4.45059	0.000244412	18934.4	375.228	-5.6571	1.37e-05	24702.6	134.887	-7.51676	6.95e-08	Thiamine thiazole synthase, chloroplastic [Source:UniProtKB/TrEMBL;Acc:Q7XXS4]	qAG7.2, Septiningsih et al., 2013
LOC_Os07g37454	OS07G0561800	7	22427661	22429638	7.3434	648.515	6.46455	0.000703806	12.5023	73.6042	2.5576	0.123859	93.8895	1015.71	3.43538	0.0294642	42.3351	1483.94	5.13144	0.00216933	5.00051	895.606	7.48465	0.000105334	16.1971	1366.56	6.39867	0.000341225	Os07g0561800 protein [Source:UniProtKB/TrEMBL;Acc:Q0D5H2]	qAG7.3, Septiningsih et al., 2013
LOC_Os07g46480	OS07G0658600	7	27746066	27747742	4301.76	214.737	-4.32429	0.0017588	6938.77	2181.01	-1.66968	0.160116	1848.45	179.939	-3.36073	0.00782655	2240.33	327.931	-2.77225	0.0216906	4646.31	231.622	-4.32624	0.0010568	3127	47.9108	-6.02828	1.79e-05	Nucleoid DNA-binding-like protein; Os07g0658600 protein [Source:UniProtKB/TrEMBL;Acc:Q8GSB5]	qAG7, Jiang et al., 2004; qAG7-2, Angaji et al., 2010
LOC_Os07g47990	OS07G0676900	7	28660188	28661792	98.4015	1291.11	3.71379	0.0213957	48.4464	121.06	1.32126	0.376576	39.1206	1562.63	5.3199	0.00132225	33.1816	851.676	4.68185	0.00337848	20.002	1823.64	6.51053	0.000216911	64.7886	656.01	3.33991	0.026537	Putative peroxidase [Source:UniProtKB/TrEMBL;Acc:Q7F1U2]	qAG7, Jiang et al., 2004; qAG7-2, Angaji et al., 2010
LOC_Os07g49110	OS07G0691200	7	29392447	29401888	6534.15	234.111	-4.80273	0.000537568	3786.63	1584.43	-1.25695	0.279925	1723.26	52.6796	-5.03176	0.000179062	2346.74	161.606	-3.8601	0.00205541	3357.84	80.2957	-5.38607	8.56e-05	9762.11	282.305	-5.11187	0.000116759	Os07g0691200 protein; Putative uncharacterized protein P0034A04.101-1; Putative uncharacterized protein P0597G07.131-1 [Source:UniProtKB/TrEMBL;Acc:Q7XI67]	qAG7, Jiang et al., 2004; qAG7-2, Angaji et al., 2010
LOC_Os08g25720	OS08G0345700	8	15658493	15663867	3029.89	18111.1	2.57954	0.0325728	4066.37	5189.1	0.351743	0.751489	3210.83	27027.6	3.07342	0.00849652	3041.26	25772	3.08306	0.007098	2149.39	11734	2.4487	0.0346924	3775.84	29008.9	2.94163	0.0101895	Os08g0345700 protein; Putative pyrophosphate-dependent phosphofructokinase alpha subunit; cDNA clone:J013120L01, full insert sequence; cDNA clone:J033024A16, full insert sequence [Source:UniProtKB/TrEMBL;Acc:Q84QT9]
LOC_Os08g27840	OS08G0366000	8	16964711	16970563	5741.07	342.287	-4.06804	0.00469327	934.546	595.613	-0.64989	0.595748	1023	39.0657	-4.71076	0.000832191	1295.23	211.149	-2.61687	0.0382099	2036.87	152.871	-3.73597	0.00597973	4062.63	246.925	-4.04027	0.00263581	Os08g0366000 protein; Phosphoenolpyruvate carboxylase; cDNA clone:J033055B18, full insert sequence [Source:UniProtKB/TrEMBL;Acc:Q8H4V1]
LOC_Os09g16520	OS09G0334600	9	10131414	10133226	20.5615	401.487	4.28734	0.0252574	403.199	945.233	1.22918	0.453545	5.86809	428.539	6.19039	0.00212768	5.72096	277.207	5.59856	0.00441007	3.33367	453.98	7.08937	0.000844796	7.62219	719.4	6.56044	0.00108231
LOC_Os09g31040	OS09G0483500	9	18672334	18673103	14.6868	875.63	5.89773	0.000136189	35.9441	162.704	2.17843	0.0981927	45.9667	4805.68	6.70801	1.03e-05	29.749	1816.59	5.93225	5.22e-05	17.5018	4417.81	7.97969	8.49e-07	18.1027	5354.22	8.20833	3.9e-07	Os09g0483500 protein; cDNA clone:J023148I04, full insert sequence [Source:UniProtKB/TrEMBL;Acc:Q0J0U0]
LOC_Os10g23180	OS10G0378100	10	12090264	12098560	1796.19	12.9165	-7.11959	0.000344259	1129.89	242.119	-2.2224	0.15838	86.0654	0.591905	-7.18392	0.00125112	92.6796	1.17961	-6.29587	0.00380811	537.555	1.54415	-8.44346	0.000201302	733.635	4.42254	-7.37404	0.000191718	Cytochrome P450 family protein, expressed; cDNA clone:J023042H12, full insert sequence [Source:UniProtKB/TrEMBL;Acc:Q338Z0]
LOC_Os10g26700	OS10G0407200	10	13940043	13941101	0	2003.13	Inf	2.98e-07	9.37671	36.8021	1.97263	0.223222	31.2965	2814.51	6.49074	9.07e-05	17.1629	2155.14	6.97235	3.7e-05	5.00051	248.608	5.63565	0.000851569	4.76387	1474.92	8.27428	5.75e-06	Os10g0407200 protein; YGL010w, putative, expressed [Source:UniProtKB/TrEMBL;Acc:Q338F7]
LOC_Os10g31460	OS10G0452300	10	16494319	16495128	4.40604	167.376	5.24747	0.00357106	1.56279	0.968477	-0.69033	1	10.7582	3669.22	8.4139	3.92e-06	5.72096	119.14	4.38026	0.0069528	4.16709	4334.43	10.0226	3.46e-07	1.90555	29.4836	3.95164	0.0291454	Expressed protein; Os10g0452300 protein [Source:UniProtKB/TrEMBL;Acc:Q7XDT6]
LOC_Os11g43860	OS11G0660000	11	26488399	26492363	1636.11	89.8772	-4.18617	0.0232674	565.728	362.21	-0.643282	0.681138	106.604	5.91905	-4.17075	0.0217473	151.033	1.17961	-7.00042	0.00183613	568.391	37.0596	-3.93897	0.0260919	524.978	23.5869	-4.4762	0.0110652	Magnesium/proton exchanger 1 [Source:UniProtKB/Swiss-Prot;Acc:Q2R041]	qAG11, Baltazar et al., 2014
LOC_Os11g47550	OS11G0701400	11	28735986	28737061	0	140.467	Inf	0.00675134	0	0	NA	NA	0.978016	1386.83	10.4696	0.000252558	1.14419	148.63	7.02126	0.00767791	0.833418	257.873	8.2734	0.00256577	0.952773	56.0188	5.87763	0.0244443	Chitinase; Chitinase III C10150-rice; Os11g0701400 protein; Xylanase inhibitor protein 2, putative, expressed; cDNA clone:002-101-E05, full insert sequence [Source:UniProtKB/TrEMBL;Acc:O49826]
LOC_Os11g47560	OS11G0701500	11	28739616	28740634	0	99.0264	Inf	0.0139672	3.12557	57.1401	4.19231	0.0933234	15.6483	934.618	5.9003	0.0120675	3.43258	517.847	7.23709	0.00440529	0	61.766	Inf	0.010782	0	22.1127	Inf	0.0432943	Glycosyl hydrolases family 18; Os11g0701500 protein; Xylanase inhibitor protein 2, putative, expressed; cDNA clone:001-007-B10, full insert sequence [Source:UniProtKB/TrEMBL;Acc:Q53NL2]
LOC_Os11g47590	OS11G0701900	11	28755994	28757153	1.46868	95.2591	6.01927	0.0449046	0	24.2119	Inf	0.0897858	9.78016	742.841	6.24705	0.0140372	0	114.422	Inf	0.00906014	0.833418	140.518	7.39749	0.0122955	0.952773	212.282	7.79963	0.0076827	Chitinase III C10701-rice; Os11g0701900 protein; Xylanase inhibitor protein 1, putative, expressed; cDNA clone:002-105-G04, full insert sequence [Source:UniProtKB/TrEMBL;Acc:Q53NM0]
DE genes in IR64, F291, F274-2a, 8391, 8753
LOC_Os01g11730	OS01G0216000	1	6340836	6344286	1273.34	6611.63	2.37638	0.0516076	35.9441	2421.19	6.07382	8.49e-06	37.1646	1310.48	5.14002	8.24e-05	26.3164	3642.62	7.11287	4.6e-07	40.0041	5767.4	7.17163	4.92e-07	1058.53	28257.1	4.73848	0.000159003	Os01g0216000 protein; Putative esterase; Uncharacterized protein; cDNA clone:001-015-E09, full insert sequence; cDNA clone:006-210-G04, full insert sequence [Source:UniProtKB/TrEMBL;Acc:Q9LHW4]
LOC_Os01g39860	OS01G0580500	1	22489496	22490967	503.757	2569.84	2.35088	0.0676657	103.144	2497.7	4.59787	0.000548327	633.754	6124.44	3.27258	0.0090088	165.908	5330.64	5.00585	0.000171247	179.185	4166.11	4.53918	0.000681735	219.138	4094.53	4.22379	0.00105394	Os01g0580500 protein; Putative 1-aminocyclopropane-1-carboxylic acid(ACC) oxidase; cDNA clone:J033094H01, full insert sequence [Source:UniProtKB/TrEMBL;Acc:Q8W096]	qAG1-2, Angaji et al., 2010
LOC_Os02g05830	OS02G0152400	2	2874951	2876254	2114.9	9278.34	2.13328	0.0743678	662.621	8909.02	3.74901	0.00168496	272.866	9493.57	5.12068	5.34e-05	168.196	17379.1	6.69107	6.6e-07	444.212	23996.1	5.75541	1.18e-05	736.494	42258.1	5.84241	6.6e-06	Ribulose bisphosphate carboxylase small chain [Source:UniProtKB/TrEMBL;Acc:Q67IU5]
LOC_Os04g39880	OS04G0474800	4	23747601	23752765	2543.75	3823.28	0.587853	0.640201	709.505	4035.64	2.50791	0.0286744	581.919	4680.19	3.00768	0.00997854	551.501	3276.95	2.57092	0.0222563	749.243	18106.7	4.59495	0.000258804	2365.74	23317.8	3.30107	0.00452475
LOC_Os04g41229	OS04G0489600	4	24461146	24468929	1227.82	3693.04	1.58871	0.226197	39.0696	1831.39	5.55075	0.000100473	60.637	1500.48	4.62908	0.000676287	61.7864	5380.18	6.44422	9.56e-06	235.024	2787.19	3.56793	0.00657283	203.893	4589.12	4.49233	0.000745494	Os04g0489600 protein; cDNA clone:J013131B20, full insert sequence [Source:UniProtKB/TrEMBL;Acc:Q0JC65]
LOC_Os05g11320	OS05G0202800	5	6393899	6396069	358.358	205.587	-0.801648	0.543979	1734.69	4.84238	-8.48475	1.14e-06	9795.81	6.51096	-10.5551	8.94e-09	862.721	4.71842	-7.51444	8.68e-06	190.019	1.54415	-6.94319	0.000254863	439.228	5.15963	-6.41156	5.8e-05	Metallothionein-like protein 3B [Source:UniProtKB/Swiss-Prot;Acc:A3B0Y1]	qAG5, Jiang et al., 2006
LOC_Os05g39580	OS05G0473000	5	23239204	23240669	33.7796	348.745	3.36795	0.073154	3.12557	193.695	5.95353	0.00566312	12.7142	351.592	4.78939	0.0114507	6.86515	429.377	5.96681	0.00276182	7.50076	835.385	6.79926	0.00101603	6.66941	1305.39	7.6127	0.000312527	Os05g0473000 protein; Putative uncharacterized protein P0486C01.3 [Source:UniProtKB/TrEMBL;Acc:Q65WX2]
LOC_Os06g50080	OS06G0714800	6	30340446	30341491	1020.73	1694.21	0.731011	0.584014	287.553	2544.19	3.14531	0.0120666	92.9115	1653.19	4.15325	0.00150932	51.4887	2619.91	5.66912	4.29e-05	318.366	9379.16	4.8807	0.000324611	330.612	5710.97	4.11052	0.00139136	Os06g0714800 protein; cDNA clone:006-204-E07, full insert sequence; cDNA clone:J023102E22, full insert sequence [Source:UniProtKB/TrEMBL;Acc:Q0D9I1]
LOC_Os10g21670	OS10G0361000	10	11110251	11110999	954.641	3440.63	1.84964	0.122406	28.1301	177.231	2.65544	0.028219	13.6922	1742.57	6.99172	6.58e-07	26.3164	842.239	5.00019	8.51e-05	1193.46	107396	6.49165	1.66e-06	80.033	5569.45	6.1208	3.53e-06	Dehydration stress-induced protein; Dehydration stress-induced protein, putative, expressed; Os10g0361000 protein; Putative uncharacterized protein OSJNBa0058E19.13; cDNA clone:001-017-F11, full insert sequence [Source:UniProtKB/TrEMBL;Acc:Q9AUN8]
LOC_Os11g10290	OS11G0208800	11	5586534	5589198	218.833	372.425	0.76712	0.638292	29.6929	249.867	3.07297	0.0438563	193.647	1862.13	3.26545	0.0284844	72.0841	627.55	3.12198	0.0327466	138.347	2189.6	3.9843	0.0102049	104.805	1160.18	3.46857	0.019416	D-mannose binding lectin family protein, expressed; cDNA clone:J033112N10, full insert sequence [Source:UniProtKB/TrEMBL;Acc:Q2R917]
DE genes in Nipponbare, IR64, F291, 8391
LOC_Os01g04280	OS01G0134700	1	1902741	1904902	107.214	1283.58	3.58161	0.0175396	20.3162	227.592	3.48575	0.0197307	5436.79	241.497	-4.49268	0.00265084	153.322	925.991	2.59444	0.0566501	25.0025	318.095	3.66931	0.0137872	380.157	480.583	0.338191	0.796391	Calmodulin binding protein-like [Source:Projected from Arabidopsis thaliana (AT1G73805) TAIR;Acc:AT1G73805]
DE genes in Nipponbare, IR64, F274-2a, 8391
LOC_Os01g15270	OS01G0256500	1	8546065	8546869	6338.82	48608.5	2.93892	0.0235777	2275.42	14012.9	2.62255	0.0322462	42877.2	60005	0.484872	0.68267	13752	90170.3	2.71301	0.0240781	2821.12	21519.3	2.93129	0.0196695	9848.82	13707.7	0.47696	0.67725	Zinc inducible protein; Zinc inducible protein-like [Source:UniProtKB/TrEMBL;Acc:Q1EHU2]
LOC_Os02g11070	OS02G0205500	2	5930298	5933077	35.2483	7098.15	7.65375	2.07e-06	9.37671	69.7303	2.89463	0.0472916	1679.25	1712.38	0.0281846	0.98648	488.57	4207.66	3.10638	0.014836	30.8365	223.902	2.86015	0.0328347	1301.49	778.367	-0.74164	0.535512	3-ketoacyl-CoA synthase [Source:UniProtKB/TrEMBL;Acc:Q6Z6C7]	qAG2.1, Baltazar et al., 2014
LOC_Os02g43360	OS02G0649800	2	26163137	26164221	61.6845	2026.81	5.03816	0.000958532	21.879	258.583	3.56301	0.0134914	148.658	777.171	2.38623	0.0739093	57.2096	3442.09	5.91088	0.000100848	46.6714	1045.39	4.48536	0.00220557	1018.51	3490.12	1.77681	0.164792	Os02g0649800 protein; Putative cytochrome b5; cDNA clone:J013079M22, full insert sequence [Source:UniProtKB/TrEMBL;Acc:Q6H3Z7]	qAG2, Septiningsih et al., 2013
LOC_Os05g27730	OS05G0343400	5	16150266	16152633	539.005	13068.8	4.59968	0.000354809	103.144	574.307	2.47716	0.0340647	7762.51	8583.81	0.145094	0.899688	1424.52	15047.1	3.40093	0.00363324	144.181	1348.04	3.22491	0.00746382	3072.69	4754.23	0.629707	0.561034	Os05g0343400 protein; Putative WRKY transcription factor; Transcription factor OsWRKY53 [Source:UniProtKB/TrEMBL;Acc:Q5W6M7]	qAG5, Jiang et al., 2004
LOC_Os07g26110	OS07G0442900	7	14988874	14990789	16.1555	634.522	5.29558	0.0348341	3.12557	114.28	5.19231	0.047181	8.80214	48.5362	2.46314	0.279755	3.43258	257.154	6.2272	0.0153245	0	177.577	Inf	0.00363617	32.3943	137.099	2.0814	0.323733	CASP-like protein Os07g0442900 [Source:UniProtKB/Swiss-Prot;Acc:Q6YT98]	qAG7, Baltazar et al., 2014
LOC_Os08g37660	OS08G0482600	8	23853339	23854314	30.8423	6001.32	7.60423	5.21e-07	3.12557	30.9913	3.30967	0.0451808	2561.42	10101.5	1.97955	0.0924932	1115.59	9875.66	3.14607	0.0086086	29.1696	1003.7	5.10471	0.00016782	1218.6	1511.77	0.311019	0.781979	Os08g0482600 protein; Putative blue copper protein; cDNA clone:001-118-G07, full insert sequence [Source:UniProtKB/TrEMBL;Acc:Q6ZFF2]	qAG8-1, Angaji et al., 2010
DE genes in Nipponbare, IR64, F274-2a, 8753
LOC_Os01g07850	OS01G0173600	1	3779634	3782002	2.93736	145.31	5.62848	0.0154947	6.25114	122.028	4.28695	0.0384518	11.7362	26.6357	1.1824	0.54343	4.57677	470.663	6.68422	0.00218738	2.50025	0	-10000000000	0.68051	81.9385	1990.14	4.60219	0.0163289	Os01g0173600 protein; Putative uncharacterized protein OSJNBa0089K24.11 [Source:UniProtKB/TrEMBL;Acc:Q94E60]
DE genes in Nipponbare, IR64, 8391, 8753
LOC_Os01g03330	OS01G0124100	1	1345118	1346047	38.1857	808.357	4.40389	0.00893117	21.879	199.506	3.18882	0.0449563	1440.62	1422.94	-0.0178123	0.985753	630.45	373.935	-0.753594	0.58966	58.3393	494.128	3.08234	0.0475475	39.0637	667.066	4.09393	0.00950514	Os01g0124100 protein; cDNA clone:001-102-D05, full insert sequence [Source:UniProtKB/TrEMBL;Acc:Q0JR27]
LOC_Os02g54870	OS02G0791300	2	33604348	33605999	46.9977	1069.92	4.50876	0.00548482	26.5674	475.522	4.16179	0.0079832	1004.42	1375.59	0.453682	0.747138	280.327	1143.04	2.02769	0.14297	91.676	1253.85	3.77368	0.0136834	42.8748	710.554	4.05074	0.00765974	Os02g0791300 protein; Putative uncharacterized protein OJ1046_F07.27; cDNA, clone: J100039D05, full insert sequence [Source:UniProtKB/TrEMBL;Acc:Q6KAE4]
LOC_Os03g22620	OS03G0347900	3	13035374	13046115	709.372	1.61456	-8.77926	0.000185747	629.803	1.93695	-8.34497	0.000284626	8.80214	4.14334	-1.08706	0.619988	16.0187	1.17961	-3.76338	0.126064	229.19	4.63245	-5.62863	0.00740869	1810.27	2.21127	-9.67711	3.43e-05	Os03g0347900 protein [Source:UniProtKB/TrEMBL;Acc:C7IZP5]
LOC_Os03g32470	OS03G0439500	3	18569114	18572507	5495.8	245.413	-4.48504	0.0020499	1108.01	172.389	-2.68424	0.0377161	445.975	131.995	-1.75648	0.163064	433.649	175.761	-1.30291	0.283902	728.408	112.723	-2.69197	0.040704	7891.82	98.77	-6.32014	2.09e-05	Os03g0439500 protein; cDNA clone:001-043-E12, full insert sequence; cDNA clone:J013109I01, full insert sequence; cDNA clone:J013111O20, full insert sequence [Source:UniProtKB/TrEMBL;Acc:B7EDK8]	qAG3, Baltazar et al., 2014
LOC_Os04g59190	OS04G0688300	4	35207157	35208610	784.275	9247.13	3.55957	0.00390057	50.0091	301.196	2.59044	0.0283948	7564.95	11213.6	0.567852	0.60791	2868.49	11290	1.97668	0.0714013	565.891	17345.4	4.93789	0.000104619	211.516	7984.16	5.2383	3.56e-05	OSJNBa0039K24.8 protein; Os04g0688300 protein; cDNA clone:001-044-B06, full insert sequence; cDNA clone:J013001L22, full insert sequence [Source:UniProtKB/TrEMBL;Acc:Q7XSU8]
LOC_Os05g45020	OS05G0525900	5	26171097	26172343	346.608	5303.29	3.93551	0.00387701	106.269	593.676	2.48195	0.0488993	1329.12	1067.8	-0.315838	0.787958	1090.42	2904.19	1.41326	0.229606	129.18	1681.58	3.70236	0.00515713	279.163	6560.84	4.5547	0.000653717	Zinc finger CCCH domain-containing protein 37 [Source:UniProtKB/Swiss-Prot;Acc:Q65X92]
LOC_Os10g36848	OS10G0512400	10	19728265	19735008	2877.14	84.4954	-5.08962	0.00362938	932.983	100.722	-3.21148	0.0386384	72.3732	11.2462	-2.68602	0.0900363	97.2563	47.1842	-1.04349	0.479004	654.233	27.7947	-4.55692	0.00658429	892.749	67.8123	-3.71864	0.0172828	Cytochrome P450 84A1, putative, expressed; Os10g0512400 protein [Source:UniProtKB/TrEMBL;Acc:Q109F2]
DE genes in Nipponbare,F291, F274-2a, 8391
LOC_Os02g44230	OS02G0661100	2	26767607	26771623	399.481	3923.38	3.2959	0.00943724	257.86	391.265	0.601559	0.604583	1533.53	9945.78	2.69723	0.0234928	760.888	11728.8	3.94623	0.00132202	327.533	2198.87	2.74705	0.0234227	3521.45	2861.38	-0.299457	0.786283	Probable trehalose-phosphate phosphatase 1 [Source:UniProtKB/Swiss-Prot;Acc:Q75WV3]	qAG2, Septiningsih et al., 2013
LOC_Os02g56680	OS02G0811400	2	34742561	34743972	0	329.909	Inf	0.00375988	1.56279	5.81086	1.89463	0.654145	0	736.922	Inf	0.000635253	1.14419	314.955	8.10467	0.00487252	0	77.2074	Inf	0.0101706	0	0	NA	NA	Cinnamoyl CoA reductase [Source:UniProtKB/TrEMBL;Acc:Q6K5W5]
LOC_Os08g04240	OS08G0136700	8	2063215	2064741	2.93736	48.4368	4.04351	0.0354732	1.56279	11.6217	2.89463	0.229394	9.78016	5959.89	9.25121	9.49e-07	1.14419	99.0869	6.43629	0.00116996	0.833418	1995.04	11.2251	2.67e-07	3.81109	22.1127	2.5366	0.130829	33-kDa secretory protein; 33kDa secretory protein; Os08g0136700 protein; cDNA clone:J033075I11, full insert sequence [Source:UniProtKB/TrEMBL;Acc:Q6ZJX4]
LOC_Os08g04500	OS08G0139700	8	2210027	2213892	1872.57	0	-10000000000	2.76e-05	1.56279	0	-10000000000	0.832537	13.6922	0	-10000000000	0.0398838	24.028	0	-10000000000	0.0412285	230.023	1.54415	-7.21883	0.00631832	5.71664	0	-10000000000	0.160164	Putative uncharacterized protein [Source:UniProtKB/TrEMBL;Acc:B9FZ04]
LOC_Os09g19970	OS09G0364400	9	11956010	11956876	8.81208	728.167	6.36864	0.00371794	3.12557	7.74781	1.30967	0.675363	37.1646	1250.7	5.07266	0.010145	14.8745	644.065	5.43629	0.0065939	2.50025	131.253	5.71413	0.00918975	18.1027	86.2395	2.25214	0.210166	Os09g0364400 protein; Putative uncharacterized protein OJ1001_G09.26; Putative uncharacterized protein P0441A12.5 [Source:UniProtKB/TrEMBL;Acc:Q69NK2]	qAG9-2, Angaji et al., 2010
DE genes in Nipponbare, F291, F274-2a, 8753
LOC_Os02g21340	OS02G0318500	2	12668310	12669932	493.476	6.45824	-6.25569	0.0165238	121.897	19.3695	-2.6538	0.230852	80.1973	1.77572	-5.49708	0.0325433	113.275	0	-10000000000	0.00882793	88.3423	3.0883	-4.83822	0.0673652	479.245	1.47418	-8.34471	0.00297416	Putative uncharacterized protein [Source:UniProtKB/TrEMBL;Acc:B9F5B6]
LOC_Os02g41954	OS02G0630300	2	25199505	25203742	5.87472	2976.17	8.98472	2.23e-07	1.56279	21.3065	3.7691	0.0594775	899.775	10071.3	3.48454	0.00745176	271.174	5140.72	4.24468	0.00135366	8.33418	41.692	2.32266	0.104086	22.8666	251.348	3.45837	0.00879221	cDNA clone:002-146-E04, full insert sequence [Source:UniProtKB/TrEMBL;Acc:B7F1G2]
LOC_Os03g16260	OS03G0269300	3	8964025	8966806	1.46868	279.857	7.57403	0.0223093	0	2.90543	Inf	0.667511	0.978016	307.791	8.29788	0.0109097	0	86.1112	Inf	0.0220767	0.833418	46.3245	5.79659	0.0695378	1.90555	143.732	6.23704	0.0337172	Os03g0269300 protein; Protein kinase domain containing protein, expressed; cDNA clone:J033059J17, full insert sequence [Source:UniProtKB/TrEMBL;Acc:Q10NG8]
LOC_Os03g18130	OS03G0291500	3	10120289	10124384	798.961	72.1171	-3.46971	0.0259918	653.244	455.184	-0.521173	0.698097	3729.17	62.7419	-5.89328	0.000272517	1675.1	41.2862	-5.34244	0.000667434	452.546	131.253	-1.78572	0.208964	379.204	54.5446	-2.79746	0.0477477	Asparagine synthetase [glutamine-hydrolyzing] 1 [Source:UniProtKB/Swiss-Prot;Acc:Q10MX3]
LOC_Os05g44922	OS05G0524400	5	26107195	26112398	396.543	5938.89	3.90464	0.00293739	575.105	794.151	0.465588	0.691431	913.467	5913.13	2.6945	0.0260182	897.047	5979.42	2.73675	0.0209949	575.892	1533.34	1.41281	0.232768	372.534	7051	4.24238	0.00085078	Os05g0524400 protein; Putative diphosphate-fructose-6-phosphate 1-phosphotransferase; cDNA clone:J023139C03, full insert sequence [Source:UniProtKB/TrEMBL;Acc:Q65X97]
LOC_Os07g47670	OS07G0673900	7	28484263	28485201	91.0581	2556.93	4.81148	0.00221145	75.0137	259.552	1.7908	0.198026	224.944	1967.49	3.12872	0.0277547	255.155	2006.51	2.97524	0.0315134	93.3429	512.657	2.45738	0.0828715	99.0884	1187.45	3.58301	0.0122521	cDNA clone:J023024E09, full insert sequence [Source:UniProtKB/TrEMBL;Acc:A3BNC1]	qAG7, Jiang et al., 2004; qAG7-2, Angaji et al., 2010
LOC_Os08g25140	OS08G0339200	8	15273554	15277688	204.146	2982.63	3.86891	0.00440195	221.916	418.382	0.91481	0.452132	491.942	5143.06	3.38607	0.00829969	411.909	5541.79	3.74995	0.00337963	320.866	1550.33	2.27253	0.0698708	300.124	4418.12	3.8798	0.00269784	Os08g0339200 protein; Putative GEKO1; cDNA clone:J033001O09, full insert sequence [Source:UniProtKB/TrEMBL;Acc:Q6Z0F0]
LOC_Os11g02369	OS11G0115350	11	693326	694254	13157.9	1956.31	-2.74972	0.0369278	1578.41	2761.13	0.806782	0.494421	408.811	52.6796	-2.95612	0.0186103	175.061	2013.59	3.52384	0.00480814	630.064	296.477	-1.08758	0.371495	2481.02	429.723	-2.52945	0.0356178	Non-specific lipid-transfer protein 2A [Source:UniProtKB/Swiss-Prot;Acc:Q7XJ39]
LOC_Os11g10480	OS11G0210300	11	5712671	5716288	3170.88	35492.9	3.48458	0.00637494	3470.95	5802.14	0.741257	0.517596	6327.76	66780.5	3.39966	0.00552888	4837.64	49688.5	3.36054	0.00512936	4583.8	20151.1	2.13625	0.0725713	3803.47	39418.8	3.3735	0.00521677	Alcohol dehydrogenase 1 [Source:UniProtKB/Swiss-Prot;Acc:Q2R8Z5]
DE genes in Nipponbare, F291, 8391, 8753
LOC_Os01g51980	OS01G0717400	1	29874486	29877459	1553.86	72.6552	-4.41865	0.0132646	703.254	214.033	-1.71621	0.264734	76.2852	5.91905	-3.68797	0.032768	78.9493	64.8783	-0.283189	0.860709	353.369	9.26489	-5.25326	0.00448743	1713.09	17.6902	-6.59751	0.000367837	Cysteine-sulphoxide lyase-like; Os01g0717400 protein; cDNA clone:J013134F14, full insert sequence [Source:UniProtKB/TrEMBL;Acc:Q942G4]	qAG1-2, Angaji et al., 2010
LOC_Os01g59819	OS01G0813700	1	34588835	34602432	1625.83	147.463	-3.46275	0.0486369	706.379	378.674	-0.899485	0.556639	82.1533	5.91905	-3.79488	0.0305919	102.977	76.6744	-0.42551	0.785995	256.693	13.8973	-4.20716	0.0186295	1114.74	56.7559	-4.2958	0.0110497	Beta-glucosidase 2 [Source:UniProtKB/Swiss-Prot;Acc:B7F8N7]	qAG1-2, Angaji et al., 2010
LOC_Os01g62480	OS01G0842400	1	36165929	36168939	2683.28	278.781	-3.26679	0.0474254	378.194	259.552	-0.543104	0.706897	271.888	26.6357	-3.35158	0.0331496	109.842	46.0046	-1.25558	0.392697	740.909	77.2074	-3.26248	0.038678	962.301	90.662	-3.40792	0.0266125	Laccase-4 [Source:UniProtKB/Swiss-Prot;Acc:Q5N9X2]	qAG1-2, Angaji et al., 2010
LOC_Os01g64860	OS01G0868900	1	37651834	37654381	2990.23	252.41	-3.56642	0.015122	2276.98	972.351	-1.22757	0.337619	292.427	44.9848	-2.70057	0.0461477	106.41	184.019	0.790219	0.5339	1287.63	47.8686	-4.7495	0.00130845	4163.62	78.1315	-5.73579	0.000135745	Os01g0868900 protein; Putative subtilisin-like protease [Source:UniProtKB/TrEMBL;Acc:Q8S1N3]	qAG1-2, Angaji et al., 2010
LOC_Os02g02000	OS02G0110200	2	554579	556320	828.335	20.9893	-5.30249	0.0192613	90.6416	40.676	-1.15599	0.550472	71.3952	1.18381	-5.91432	0.0150478	76.6609	10.6165	-2.85219	0.158911	311.698	10.809	-4.84984	0.0284141	639.311	12.5305	-5.673	0.00960558	Hydroperoxide lyase; Os02g0110200 protein [Source:UniProtKB/TrEMBL;Acc:Q6Z8Z7]
LOC_Os02g20560	OS02G0308800	2	12127913	12129233	7695.88	262.635	-4.87295	0.000663564	4985.29	1563.12	-1.67325	0.166703	78.2413	3.55143	-4.46146	0.00226259	97.2563	69.5968	-0.482772	0.695033	2531.92	69.4867	-5.18735	0.000214988	4654.3	73.709	-5.98058	2.66e-05	Putative fasciclin-like arabinogalactan-protein; cDNA clone:001-035-E01, full insert sequence; cDNA clone:006-201-D11, full insert sequence; cDNA clone:006-304-D08, full insert sequence [Source:UniProtKB/TrEMBL;Acc:Q6Z0V9]
LOC_Os02g29040	OS02G0492000	2	17196142	17204631	33.7796	547.336	4.0182	0.0406084	4.68836	63.9195	3.7691	0.0695698	69.4391	863.59	3.63653	0.047062	94.968	660.579	2.79822	0.106871	2.50025	77.2074	4.94859	0.0204664	25.7249	678.86	4.72188	0.0129774	Os02g0492000 protein; Putative ankyrin-like protein; cDNA clone:002-117-A05, full insert sequence [Source:UniProtKB/TrEMBL;Acc:Q6K5P5]	qAG2.2, Baltazar et al., 2014
LOC_Os02g37700	OS02G0589700	2	22757091	22758212	4031.52	110.328	-5.19145	0.00157553	814.211	745.727	-0.126755	0.922583	20.5383	1.18381	-4.11681	0.0269584	28.6048	25.9513	-0.140449	0.954371	580.893	12.3532	-5.55532	0.000853693	2041.79	15.4789	-7.04339	3.53e-05	Os02g0589700 protein [Source:UniProtKB/TrEMBL;Acc:Q0DZZ3]	qAG2-1, Angaji et al., 2010
LOC_Os02g40260	OS02G0616100	2	24372806	24374439	61139.6	3911.54	-3.9663	0.00229392	34686	8580.7	-2.01519	0.0780153	2236.72	401.312	-2.47859	0.0334163	4280.42	1105.29	-1.95333	0.0798262	37840.5	926.489	-5.35201	4.42e-05	28723.3	589.672	-5.60616	1.82e-05	Putative uncharacterized protein [Source:UniProtKB/TrEMBL;Acc:B9F131]	qAG2-1, Angaji et al., 2010
LOC_Os02g43194	OS02G0646500	2	26034336	26041422	1822.63	110.328	-4.04615	0.0284088	459.459	278.921	-0.720078	0.648562	82.1533	1.77572	-5.53185	0.00621606	38.9025	50.7231	0.382778	0.82555	125.846	6.1766	-4.34871	0.0250851	988.979	16.216	-5.93045	0.00168175	Aldehyde dehydrogenase [Source:UniProtKB/TrEMBL;Acc:Q6H627]	qAG2, Septiningsih et al., 2013
LOC_Os02g56460	OS02G0808800	2	34564290	34566122	1.46868	380.498	8.01723	0.0090033	0	0.968477	Inf	1	0.978016	514.366	9.03872	0.00308956	4.57677	99.0869	4.43629	0.0719778	0	63.3101	Inf	0.0157246	0	222.601	Inf	0.00351037	Cinnamoyl CoA reductase; Os02g0808800 protein; cDNA clone:002-108-H04, full insert sequence [Source:UniProtKB/TrEMBL;Acc:Q6K9A2]
LOC_Os02g56700	OS02G0811800	2	34764348	34766529	7.3434	1077.99	7.19768	6.21e-05	0	3.87391	Inf	0.425031	19.5603	2719.21	7.11912	2.85e-05	1.14419	17.6941	3.95087	0.0600523	7.50076	1922.47	8.0017	8.09e-06	1.90555	3274.89	10.747	1.2e-07	Os02g0811800 protein; Putative cinnamoyl CoA reductase; cDNA clone:001-123-D09, full insert sequence [Source:UniProtKB/TrEMBL;Acc:Q6K3G2]
LOC_Os03g10090	OS03G0197100	3	5098241	5100592	4726.21	205.587	-4.52286	0.00211555	3792.88	1278.39	-1.56897	0.211264	1207.85	134.362	-3.16824	0.0170663	1170.51	212.329	-2.46276	0.0515439	1566.83	160.591	-3.28638	0.0147485	1068.06	166.582	-2.68068	0.0365525	Mannitol transporter, putative, expressed; Os03g0197100 protein; cDNA clone:J023048F11, full insert sequence [Source:UniProtKB/TrEMBL;Acc:Q10QG5]
LOC_Os03g14654	OS03G0251000	3	7965176	7966095	24231.7	3628.46	-2.73947	0.0261174	2276.98	669.217	-1.76657	0.11394	9803.63	53.8634	-7.50787	1.02e-07	6952.11	1734.02	-2.00333	0.0676313	4965.51	75.6633	-6.0362	6.17e-06	18067.4	384.024	-5.55605	1.47e-05	Os03g0251000 protein [Source:UniProtKB/TrEMBL;Acc:Q0DTF5]
LOC_Os03g61720	OS03G0832800	3	34985196	34990759	3583.58	179.216	-4.32163	0.00769052	973.615	284.732	-1.77375	0.206809	61.615	1.77572	-5.11681	0.00397051	61.7864	33.029	-0.903557	0.530781	503.385	3.0883	-7.34871	0.000128831	1952.23	9.58217	-7.67056	1.71e-05	Acyltransferase family protein, expressed; Os03g0832800 protein; Putative uncharacterized protein OSJNBa0078D06.33; cDNA clone:001-043-C05, full insert sequence [Source:UniProtKB/TrEMBL;Acc:Q7Y144]
LOC_Os04g11970	OS04G0196200	4	6564647	6566873	659.437	10.2256	-6.01098	0.000990219	3080.25	1021.74	-1.59202	0.275769	114.428	1.77572	-6.00989	0.00140402	254.011	115.601	-1.13573	0.427384	521.72	32.4271	-4.008	0.0142897	148.633	5.15963	-4.84834	0.00464161	OSJNBb0026E15.9 protein; Os04g0196200 protein [Source:UniProtKB/TrEMBL;Acc:Q7XPB2]
LOC_Os04g28620	OS04G0354600	4	16945210	16951596	11073.8	310.534	-5.15626	0.000350123	2691.12	785.435	-1.77664	0.142777	67.4831	0.591905	-6.83302	0.000159694	35.47	116.781	1.71914	0.163563	619.23	10.809	-5.84016	9.72e-05	6717.05	60.4414	-6.79615	3.95e-06	OSJNBb0002N06.11 protein; Os04g0354600 protein; cDNA clone:J013044F22, full insert sequence [Source:UniProtKB/TrEMBL;Acc:Q7XRZ6]
LOC_Os04g31410	OS04G0382900	4	18786423	18787210	1674.29	128.089	-3.70834	0.0449584	118.772	71.6673	-0.728805	0.658314	110.516	4.14334	-4.73732	0.0129209	9.15354	18.8737	1.04398	0.588444	826.751	44.7803	-4.20652	0.0202363	749.833	33.9061	-4.46695	0.0123314	OSJNBa0072D21.16 protein; OSJNBa0084N21.2 protein; Os04g0382900 protein; cDNA clone:001-107-D07, full insert sequence [Source:UniProtKB/TrEMBL;Acc:Q7XVC6]
LOC_Os04g46110	OS04G0545300	4	27326622	27327503	2858.05	207.202	-3.78592	0.0152861	2173.83	535.568	-2.0211	0.143448	219.076	10.6543	-4.36192	0.00483671	96.1121	129.757	0.433018	0.751158	883.423	88.0165	-3.32726	0.0238423	1460.6	63.3897	-4.52617	0.00264992	OSJNBa0079A21.5 protein; OSJNBb0038F03.16 protein; Os04g0545300 protein [Source:UniProtKB/TrEMBL;Acc:Q7FAI8]
LOC_Os04g55159	OS04G0644400	4	32792893	32794163	7015.88	50.0514	-7.13107	5.73e-06	5602.59	1161.2	-2.27047	0.0683978	90.9555	7.69477	-3.56321	0.00989335	312.364	114.422	-1.44887	0.229272	1495.15	142.062	-3.3957	0.0099382	3805.38	44.9625	-6.40317	1.32e-05	Os04g0644400 protein [Source:UniProtKB/TrEMBL;Acc:Q0J9L5]
LOC_Os05g06140	OS05G0153300	5	3069666	3074392	561.035	10.7637	-5.70384	0.016491	79.7021	3.87391	-4.36276	0.0584735	70.4171	0.591905	-6.89442	0.0108808	11.4419	1.17961	-3.27795	0.257238	102.51	0	-10000000000	0.0105332	1026.14	5.15963	-7.63574	0.00196084	Os05g0153300 protein; Putative lipase [Source:UniProtKB/TrEMBL;Acc:Q65XP3]	qAG5, Jiang et al., 2006
LOC_Os06g11490	OS06G0218600	6	6086859	6088128	6503.31	961.74	-2.75746	0.0428891	2197.28	1091.47	-1.00944	0.404778	934.983	22.4924	-5.37743	0.000176587	370.718	497.794	0.425225	0.719929	2302.73	222.357	-3.3724	0.0105391	3508.11	412.77	-3.08728	0.0150607	Os06g0218600 protein; Putative blue copper protein; cDNA clone:001-019-E04, full insert sequence; cDNA clone:006-309-G10, full insert sequence; cDNA clone:J023135E05, full insert sequence [Source:UniProtKB/TrEMBL;Acc:Q69QA7]	qAG6, Septiningsih et al., 2013
LOC_Os06g18670	OS06G0289900	6	10588158	10589935	11974.1	1534.91	-2.9637	0.0235513	1523.72	1472.08	-0.0497332	0.962685	756.006	26.0438	-4.85938	0.000291192	501.156	271.309	-0.885321	0.435981	2081.88	43.2362	-5.5895	5.93e-05	9373.38	387.709	-4.59552	0.000389835	Os06g0289900 protein; Putative UDP-glycosyltransferase; cDNA, clone: J065062J21, full insert sequence [Source:UniProtKB/TrEMBL;Acc:Q5VME5]
LOC_Os07g23120	OS07G0413800	7	13037553	13038640	2042.93	90.9536	-4.48937	0.0154295	346.938	205.317	-0.756826	0.629966	178.977	3.55143	-5.65523	0.00339814	42.3351	120.32	1.50695	0.343527	543.389	3.0883	-7.45903	0.000553353	565.947	6.63381	-6.41469	0.000920261	Putative uncharacterized protein [Source:UniProtKB/TrEMBL;Acc:B9FWT3]	qAG7, Baltazar et al., 2014
LOC_Os07g23660	OS07G0418700	7	13366416	13367503	257.019	15.6074	-4.04157	0.0270306	1148.65	506.513	-1.18126	0.445195	724.71	65.7015	-3.46341	0.0379779	552.645	240.64	-1.19948	0.428571	80.8416	4.63245	-4.12525	0.0340388	822.243	12.5305	-6.03605	0.00114688	Os07g0418700 protein; Putative uncharacterized protein OJ1123_B01.110; Putative uncharacterized protein P0025D09.126; cDNA clone:001-205-C04, full insert sequence [Source:UniProtKB/TrEMBL;Acc:Q8H5W8]	qAG7, Baltazar et al., 2014
LOC_Os07g49140	OS07G0691700	7	29431144	29435262	2037.06	135.623	-3.90881	0.00807735	3227.15	1840.11	-0.810473	0.51987	653.315	78.1315	-3.0638	0.023747	464.542	264.232	-0.814005	0.512141	2043.54	105.002	-4.28258	0.00275891	2208.53	251.348	-3.13533	0.0184518	Putative uncharacterized protein P0034A04.110; cDNA, clone: J065162K07, full insert sequence [Source:UniProtKB/TrEMBL;Acc:Q84NR1]	qAG7, Jiang et al., 2004; qAG7-2, Angaji et al., 2010
LOC_Os08g26220	OS08G0351200	8	15972793	15977405	91.0581	0.538187	-7.40254	0.0419559	51.5719	93.9423	0.865188	0.749838	37.1646	0	-10000000000	0.0443658	2.28838	0	-10000000000	0.687886	222.523	0	-10000000000	0.0216186	69.5524	0	-10000000000	0.0290699	cDNA, clone: J065219E08, full insert sequence [Source:UniProtKB/TrEMBL;Acc:B7F941]
LOC_Os08g35760	OS08G0460000	8	22558107	22559044	31141.9	3383.58	-3.20223	0.0141394	94684.5	33544.2	-1.49707	0.195778	9882.85	365.797	-4.75581	0.000276943	5639.72	5065.23	-0.154997	0.888748	49295.9	436.994	-6.81771	1.91e-06	25399	548.395	-5.53341	3.56e-05	Germin-like protein 8-14 [Source:UniProtKB/Swiss-Prot;Acc:Q6ZBZ2]	qAG8-1, Angaji et al., 2010
LOC_Os09g28630	OS09G0460400	9	17417341	17418456	740.214	19.3747	-5.25569	0.0144349	348.501	74.5727	-2.22444	0.225115	162.351	7.69477	-4.39909	0.0295716	107.554	7.07764	-3.92565	0.051243	267.527	0	-10000000000	0.00128615	858.449	3.68545	-7.86375	0.000681173	Os09g0460400 protein; Putative PrMC3; cDNA clone:J013094M19, full insert sequence [Source:UniProtKB/TrEMBL;Acc:Q67J09]
LOC_Os09g31502	OS09G0491820	9	19011720	19014197	704.966	45.2077	-3.96291	0.0289384	646.993	67.7934	-3.25453	0.0512272	91.9335	4.73524	-4.27908	0.0185594	322.662	62.5191	-2.36766	0.136361	651.733	12.3532	-5.72133	0.00266203	1668.31	30.2207	-5.7867	0.00158589	Os09g0491820 protein [Source:UniProtKB/TrEMBL;Acc:C7J743]
LOC_Os10g02220	OS10G0110800	10	771699	776341	2009.15	213.66	-3.2332	0.0448426	831.402	578.181	-0.524026	0.708355	228.856	7.10286	-5.00989	0.00279627	153.322	129.757	-0.240754	0.867966	558.39	26.2505	-4.41086	0.006909	1788.36	85.5024	-4.38652	0.0051352	Os10g0110800 protein [Source:UniProtKB/TrEMBL;Acc:C7J804]
LOC_Os10g05750	OS10G0148100	10	2897688	2899059	2460.04	311.61	-2.98087	0.0335253	3713.18	1099.22	-1.75617	0.163365	1446.49	118.973	-3.60385	0.00755718	556.077	734.895	0.402252	0.738836	1972.7	143.606	-3.77999	0.00580663	2965.98	324.319	-3.19302	0.0143127	Os10g0148100 protein; Proline-rich protein; Proline-rich protein, putative, expressed; Putative proline-rich protein; cDNA clone:001-031-E08, full insert sequence; cDNA clone:J013025G01, full insert sequence [Source:UniProtKB/TrEMBL;Acc:Q7XGT9]
LOC_Os10g38540	OS10G0528900	10	20574829	20576053	1722.76	31.753	-5.76168	0.00245911	1286.17	267.3	-2.26655	0.153669	113.45	1.77572	-5.99751	0.00257624	56.0654	20.0533	-1.48327	0.361004	136.681	1.54415	-6.46785	0.00376489	851.779	4.42254	-7.58946	0.000154803	Glutathione S-transferase GSTU6, putative, expressed; Os10g0528900 protein; Putative glutathione S-transferase; Putative glutathione S-transferase OsGSTU14; cDNA clone:006-201-C07, full insert sequence [Source:UniProtKB/TrEMBL;Acc:Q945W4]
LOC_Os10g38580	OS10G0529300	10	20589767	20590845	8245.17	954.744	-3.11036	0.0180609	3189.65	1511.79	-1.07714	0.352879	1421.06	146.201	-3.28094	0.00849401	1578.99	585.085	-1.43228	0.209679	2912.8	148.238	-4.29642	0.0010176	8641.65	404.662	-4.41652	0.00059409	Glutathione S-transferase GSTU6, putative, expressed; Os10g0529300 protein; Putative glutathione S-transferase; Putative glutathione S-transferase OsGSTU18; cDNA clone:001-208-G09, full insert sequence; cDNA clone:006-201-A11, full insert sequence; cDNA clone:006-207-H12, full insert sequence [Source:UniProtKB/TrEMBL;Acc:Q945W2]
LOC_Os10g38710	OS10G0530500	10	20622453	20623389	1893.13	54.3569	-5.12216	0.00414368	371.943	162.704	-1.19283	0.424527	191.691	10.6543	-4.16928	0.0129782	218.541	37.7474	-2.53345	0.0989577	853.42	72.575	-3.55571	0.0288029	1408.2	98.0329	-3.84444	0.0160297
LOC_Os10g39150	OS10G0536500	10	20893685	20895216	4596.97	434.855	-3.40208	0.0166642	776.704	766.065	-0.0198986	0.984872	871.412	61.5581	-3.82333	0.00516646	1088.13	220.586	-2.30243	0.0672824	1878.52	208.46	-3.17176	0.0180262	4338.93	391.395	-3.47064	0.00857961	Expressed protein; Os10g0536500 protein; Putative uncharacterized protein OSJNBa0040D23.6; Putative uncharacterized protein OSJNBb0060I05.14; cDNA clone:J013075C23, full insert sequence [Source:UniProtKB/TrEMBL;Acc:Q8W2X4]
LOC_Os11g06900	OS11G0170000	11	3382390	3388871	1421.68	144.234	-3.30111	0.0382726	1606.54	830.953	-0.951121	0.494101	612.238	59.1905	-3.37065	0.0253334	455.389	67.2375	-2.75976	0.0566108	917.594	55.5894	-4.04497	0.00989329	860.354	107.615	-2.99905	0.0397516	Amidase family protein, expressed [Source:UniProtKB/TrEMBL;Acc:Q2RA14]
LOC_Os11g42220	OS11G0641800	11	25432425	25434791	4185.74	43.055	-6.60316	0.000340119	979.867	243.088	-2.01111	0.175937	17.6043	1.18381	-3.89442	0.0485886	22.8838	34.2086	0.580029	0.72277	190.853	1.54415	-6.9495	0.00108328	182.932	0	-10000000000	5.57e-05	Laccase-20 [Source:UniProtKB/Swiss-Prot;Acc:Q2R0L0]	qAG11, Jiang et al., 2006; qAG11, Baltazar et al., 2014
LOC_Os12g17600	OS12G0274700	12	10080505	10081588	148951	16353.9	-3.18713	0.0242813	30410.2	20677.9	-0.556464	0.650331	29107.7	2752.36	-3.40266	0.0111183	20253.3	12041.4	-0.750155	0.533831	104942	5444.67	-4.26861	0.00219891	113433	9411.16	-3.59133	0.00690889	Ribulose bisphosphate carboxylase small chain, chloroplastic [Source:UniProtKB/Swiss-Prot;Acc:Q0INY7]
LOC_Os12g19381	OS12G0291100	12	11262587	11263636	179254	18162.2	-3.30299	0.0207823	35208	23778	-0.566273	0.646752	10708.3	1258.98	-3.0884	0.0205006	12485.4	11789	-0.0828057	0.945392	56277.4	6496.23	-3.11488	0.0204552	167276	13769.6	-3.60267	0.00711443	Ribulose bisphosphate carboxylase small chain A, chloroplastic [Source:UniProtKB/Swiss-Prot;Acc:P18566]
DE genes in Nipponbare, F274-2a, 8391, 8753
LOC_Os01g11150	OS01G0209700	1	5968819	5972489	26.4362	544.107	4.3633	0.0157646	6.25114	54.2347	3.11702	0.0925593	122.252	728.635	2.57534	0.108409	110.987	1933.37	4.12266	0.0132919	17.5018	315.006	4.16981	0.0169652	64.7886	677.385	3.38617	0.0374633	Os01g0209700 protein; Putative GA 2-oxidase 5 [Source:UniProtKB/TrEMBL;Acc:Q9LWE4]
LOC_Os01g21590	OS01G0318400	1	12092783	12093601	76.3713	1389.06	4.18493	0.0141263	31.2557	172.389	2.46347	0.120633	103.67	318.445	1.61905	0.285545	51.4887	816.287	3.98675	0.0129769	25.836	784.428	4.92419	0.00415389	79.0802	1589.9	4.32948	0.00782975	Os01g0318400 protein [Source:UniProtKB/TrEMBL;Acc:Q7XXQ7]
LOC_Os02g03870	OS02G0131400	2	1644223	1648808	2.93736	635.061	7.75623	0.00129179	3.12557	13.5587	2.11702	0.396987	17.6043	211.31	3.58536	0.0597643	3.43258	58.9803	4.10287	0.0492967	5.00051	1487.02	8.21613	0.000367788	0.952773	417.93	8.77691	0.00048452	Putative beta-D-glucan exohydrolase [Source:UniProtKB/TrEMBL;Acc:Q6ZG89]
LOC_Os02g33070	OS02G0533800	2	19648496	19649478	187.991	4386.76	4.54442	0.00110747	118.772	591.739	2.31677	0.0645367	1110.05	3376.23	1.60479	0.18793	838.693	6192.93	2.88441	0.0196211	101.677	1141.13	3.48839	0.00801735	487.82	2788.41	2.51502	0.0404133	Os02g0533800 protein; Putative uncharacterized protein B1136H02.6; Putative uncharacterized protein P0605D08.39 [Source:UniProtKB/TrEMBL;Acc:Q6EPY3]
LOC_Os02g56860	OS02G0813600	2	34853787	34855494	145.399	1398.21	3.26549	0.0174836	246.92	885.188	1.84194	0.142704	1156.01	2602.61	1.1708	0.344008	447.379	6346.28	3.82634	0.00362193	202.521	1730.99	3.09546	0.0191064	115.286	2366.8	4.35965	0.00131407	3-ketoacyl-CoA synthase [Source:UniProtKB/TrEMBL;Acc:Q6K3E6]
LOC_Os03g04530	OS03G0138200	3	2115174	2116896	904.706	41.9786	-4.42972	0.00813587	1901.91	1701.61	-0.160545	0.905412	280.691	61.5581	-2.18896	0.136005	445.091	33.029	-3.7523	0.0144963	940.096	47.8686	-4.29566	0.00736696	329.66	30.2207	-3.44737	0.0230534	Cytochrome P450 family protein, expressed; Os03g0138200 protein; cDNA clone:001-203-H07, full insert sequence [Source:UniProtKB/TrEMBL;Acc:Q10S17]
LOC_Os03g07600	OS03G0172200	3	3867253	3871354	214.427	2883.07	3.74905	0.00673509	75.0137	394.17	2.39359	0.0632036	388.272	1013.34	1.38398	0.264412	213.964	2657.65	3.63471	0.00527311	97.5099	3633.38	5.21962	0.000268248	319.179	6201.14	4.28009	0.00145448	Calcium-binding protein 39, putative, expressed; Os03g0172200 protein; cDNA clone:J023008H01, full insert sequence [Source:UniProtKB/TrEMBL;Acc:Q10R42]
LOC_Os03g19250	OS03G0305100	3	10824184	10827482	738.746	5192.43	2.81326	0.0287652	287.553	345.746	0.265888	0.827292	1087.55	3393.98	1.64189	0.166352	1313.53	7035.17	2.42113	0.0403393	373.371	2070.7	2.47144	0.0446202	856.543	5449.3	2.66947	0.0260802	AMP-binding enzyme family protein, expressed; Os03g0305100 protein [Source:UniProtKB/TrEMBL;Acc:Q10MK9]
LOC_Os03g43410	OS03G0633800	3	24212554	24213858	186.522	1566.66	3.07027	0.0306529	176.595	353.494	1.00124	0.441031	774.588	1888.18	1.28549	0.318408	135.015	1948.71	3.85133	0.00499955	188.353	3349.26	4.15233	0.00360114	203.893	2269.5	3.47649	0.0102377	Auxin-responsive protein IAA12 [Source:UniProtKB/Swiss-Prot;Acc:Q75GK1]	qAG3, Baltazar et al., 2014
LOC_Os03g48030	OS03G0684700	3	27300727	27302989	728.465	12.9165	-5.81757	0.00532233	651.682	138.492	-2.23436	0.197563	82.1533	12.43	-2.72449	0.133264	148.745	8.25724	-4.17104	0.0294838	642.566	9.26489	-6.11593	0.00348233	718.391	15.4789	-5.5364	0.00481762	HPP family protein, expressed; Os03g0684700 protein; cDNA clone:J013152H14, full insert sequence [Source:UniProtKB/TrEMBL;Acc:Q10F18]	qAG3-1, Angaji et al., 2010
LOC_Os03g61160	OS03G0826900	3	34739011	34740504	1.46868	120.016	6.35256	0.022493	3.12557	26.1489	3.06456	0.22343	16.6263	169.285	3.34792	0.112909	6.86515	410.503	5.90196	0.011056	0.833418	355.154	8.73519	0.0018942	17.1499	732.667	5.41688	0.0154019
LOC_Os04g48930	OS04G0578600	4	29178889	29181660	1687.51	5.92006	-8.15507	0.000324224	96.8927	328.314	1.76061	0.309586	20.5383	1.77572	-3.53185	0.0935288	130.438	2.35921	-5.78891	0.00762979	101.677	3.0883	-5.04104	0.0216913	799.377	2.94836	-8.08282	0.000301036
LOC_Os04g59200	OS04G0688500	4	35215245	35216755	10.2808	586.624	5.83442	0.00253748	1.56279	0.968477	-0.69033	1	448.909	568.229	0.340049	0.829835	34.3258	674.735	4.29696	0.0111793	1.66684	1504	9.81748	1.32e-05	1.90555	768.047	8.65485	6.05e-05	OSJNBa0039K24.9 protein; Os04g0688500 protein; cDNA clone:J013118D03, full insert sequence [Source:UniProtKB/TrEMBL;Acc:Q7XSU7]
LOC_Os04g59260	OS04G0689000	4	35245424	35246736	33.7796	5683.79	7.39456	3.33e-06	139.088	595.613	2.09838	0.0969913	1315.43	5455.59	2.0522	0.100912	510.31	2862.9	2.48803	0.0444713	151.682	971.27	2.67882	0.0390775	15.2444	700.972	5.52301	0.000141821	Class III peroxidase 64; OSJNBa0039K24.14 protein; Os04g0689000 protein [Source:UniProtKB/TrEMBL;Acc:Q7XSU2]
LOC_Os05g04470	OS05G0135200	5	2061827	2063241	2.93736	259.406	6.46455	0.0126768	14.0651	65.8564	2.22721	0.294594	98.7796	379.411	1.94148	0.327572	8.00935	167.504	4.38637	0.044661	15.8349	575.968	5.1848	0.0211574	6.66941	302.207	5.50183	0.0156747	Class III peroxidase 69; Os05g0135200 protein; cDNA, clone: J100072E18, full insert sequence [Source:UniProtKB/TrEMBL;Acc:Q5U1M4]
LOC_Os05g29810	OS05G0361700	5	17246987	17248234	165.961	4055.24	4.61087	0.00121821	217.227	521.041	1.26219	0.311136	623.974	3192.74	2.35524	0.0631232	863.865	4803.36	2.47516	0.0461015	123.346	1417.53	3.5226	0.00866921	67.6469	1786.71	4.72313	0.000625483	Os05g0361700 protein; Putative uncharacterized protein P0530H10.12; Putative uncharacterized protein P0692D12.5; cDNA clone:J023031H12, full insert sequence [Source:UniProtKB/TrEMBL;Acc:Q6L4M2]	qAG5, Jiang et al., 2004
LOC_Os06g05010	OS06G0142350	6	2208762	2209556	11.7494	5882.38	8.96767	2.98e-07	7.81393	10.6532	0.447173	0.879515	194.625	980.195	2.33237	0.0723185	161.331	1369.52	3.08558	0.0179394	40.8375	1235.32	4.91885	0.00072287	40.0165	5094.76	6.99228	7.27e-06
LOC_Os06g35520	OS06G0547400	6	20705378	20706934	445.01	5210.19	3.54943	0.00791608	175.032	751.538	2.10223	0.0878338	673.853	3364.39	2.31984	0.0595274	180.782	7369	5.34914	9.65e-05	190.853	2807.26	3.87863	0.00331501	221.996	1581.79	2.83296	0.0217557	Class III peroxidase 86; Os06g0547400 protein; Putative bacterial-induced peroxidase [Source:UniProtKB/TrEMBL;Acc:Q5Z7J2]
LOC_Os07g48910	OS07G0688700	7	29268639	29269922	665.312	6791.92	3.35172	0.00620391	450.082	1511.79	1.748	0.118763	5285.2	19930.6	1.91496	0.087937	1759.77	18898.5	3.42481	0.00311094	1190.95	10894	3.19334	0.00707511	878.457	5265.77	2.5836	0.0218079		qAG7, Jiang et al., 2004; qAG7-2, Angaji et al., 2010
LOC_Os08g03420	OS08G0128000	8	1600851	1604896	61.6845	6526.59	6.72528	9.79e-06	153.153	251.804	0.717328	0.561612	212.229	934.026	2.13784	0.0849568	294.057	4270.17	3.86013	0.00283088	120.846	1329.51	3.45966	0.00852058	87.6551	6762.8	6.26964	1.52e-05	Kelch repeat-containing protein-like; Os08g0128000 protein; cDNA clone:J023013D19, full insert sequence; cDNA clone:J033150H12, full insert sequence [Source:UniProtKB/TrEMBL;Acc:Q6ZK44]
LOC_Os08g16260	OS08G0262500	8	9921522	9923218	3140.04	248.642	-3.65864	0.0348763	520.408	339.935	-0.614382	0.681741	8.80214	1.77572	-2.30945	0.267262	3.43258	113.242	5.04398	0.00727119	88.3423	3.0883	-4.83822	0.015563	457.331	3.68545	-6.95526	0.000325722	Os08g0262500 protein; Putative cytochrome P450; cDNA clone:001-007-F05, full insert sequence; cDNA clone:006-203-C11, full insert sequence [Source:UniProtKB/TrEMBL;Acc:Q6YXE1]
LOC_Os08g34900	OS08G0450100	8	21978068	21981556	32.3109	475.219	3.8785	0.025113	20.3162	45.5184	1.16382	0.488274	496.832	1334.15	1.4251	0.346772	35.47	1459.17	5.36241	0.0018737	39.1707	841.561	4.42522	0.00908295	15.2444	391.395	4.68228	0.00592084	Pectinesterase [Source:UniProtKB/TrEMBL;Acc:Q6ZLF6]
LOC_Os10g40480	OS10G0552300	10	21674707	21675375	32.3109	737.854	4.51324	0.00421172	21.879	92.0053	2.07217	0.157554	807.841	2697.31	1.73938	0.201261	109.842	1729.3	3.97668	0.00596965	9.1676	2550.93	8.12027	5.29e-06	15.2444	590.409	5.27537	0.000760441
LOC_Os11g02080	OS11G0112000	11	563239	563851	193.866	6971.14	5.16826	0.000129006	303.18	620.794	1.03394	0.369582	659.183	3103.36	2.23508	0.0567735	459.965	8604.05	4.22542	0.000679365	273.361	4054.93	3.8908	0.00204284	317.273	13026.6	5.35959	4.56e-05
LOC_Os11g47520	OS11G0701100	11	28730171	28731320	2.93736	381.575	7.0213	0.00690594	3.12557	13.5587	2.11702	0.434009	97.8016	839.322	3.10129	0.125539	2.28838	205.251	6.48692	0.00853744	2.50025	319.639	6.99822	0.00498481	0.952773	90.662	6.57222	0.0126655	Xylanase inhibitor protein 2 [Source:UniProtKB/Swiss-Prot;Acc:Q53NL5]
LOC_Os12g02040	OS12G0111600	12	607455	608215	364.232	6340.38	4.12164	0.00427015	90.6416	178.2	0.975251	0.456288	117.362	606.703	2.37003	0.0716355	57.2096	2034.82	5.1525	0.000372112	66.6735	844.649	3.66317	0.00865746	166.735	3105.36	4.21913	0.0023293	Hypoxia induced protein conserved region containing protein, expressed; Os12g0111600 protein; cDNA clone:002-157-A04, full insert sequence; cDNA clone:J013047D01, full insert sequence [Source:UniProtKB/TrEMBL;Acc:Q2QYP0]
DE genes in IR64, F291, F274-2a, 8391
LOC_Os01g24710	OS01G0348900	1	13903285	13904626	2507.04	11569.9	2.20633	0.0672714	240.669	1668.69	2.79359	0.0164981	451.843	2751.77	2.60646	0.0240406	694.525	5847.31	3.07367	0.00751387	100.01	18789.2	7.55361	1.22e-07	3853.01	12366.2	1.68234	0.126267	Salt stress-induced protein [Source:UniProtKB/Swiss-Prot;Acc:Q0JMY8]
LOC_Os01g52240	OS01G0720500	1	30030998	30032054	2160.43	390.186	-2.46908	0.0927464	68.7626	1696.77	4.62503	0.00205999	34.2306	272.868	2.99485	0.0354258	14.8745	871.729	5.87297	0.000222288	103.344	1476.21	3.83637	0.0088028	433.512	2548.86	2.55571	0.0587638	Os01g0720500 protein; Putative chlorophyll a/b-binding protein 3C; Uncharacterized protein; cDNA clone:001-013-E06, full insert sequence; cDNA clone:001-014-B02, full insert sequence; cDNA clone:006-301-C12, full insert sequence [Source:UniProtKB/TrEMBL;Acc:Q8W0E6]	qAG1-2, Angaji et al., 2010
LOC_Os03g25330	OS03G0368900	3	14469692	14471204	380.388	2364.26	2.63584	0.0724242	56.2603	443.562	2.97895	0.0367327	66.5051	741.657	3.47922	0.0156506	19.4513	2019.49	6.69798	4.57e-05	126.68	1363.48	3.42804	0.0179459	345.857	1829.46	2.40317	0.07552	Class III peroxidase 45; Os03g0368900 protein; Peroxidase family protein, expressed; Putative peroxidase; cDNA clone:J013092B12, full insert sequence; cDNA clone:J013092B13, full insert sequence [Source:UniProtKB/TrEMBL;Acc:Q5U1P8]
LOC_Os05g48040	OS05G0554000	5	27542128	27545922	837.147	3967.51	2.24468	0.0608838	401.636	2399.89	2.57901	0.0242308	449.887	13812.7	4.94029	8.37e-05	418.774	8337.46	4.31536	0.000344034	697.571	25435.2	5.18834	5.17e-05	4613.33	17659.2	1.93654	0.0780964	cDNA clone:001-123-D07, full insert sequence [Source:UniProtKB/TrEMBL;Acc:B7EXY0]
LOC_Os07g35560	OS07G0539900	7	21280322	21282626	60.2158	112.481	0.901467	0.629599	9.37671	1423.66	7.24631	0.000291943	19.5603	494.241	4.65921	0.0085669	16.0187	1771.77	6.78929	0.000386977	12.5013	160.591	3.68325	0.0357212	48.5914	294.099	2.59753	0.105053	Os07g0539900 protein; cDNA clone:J013047P08, full insert sequence; cDNA clone:J013047P11, full insert sequence [Source:UniProtKB/TrEMBL;Acc:Q0D5S1]
LOC_Os07g37280	OS07G0558900	7	22339803	22340308	30.8423	78.0371	1.33925	0.664045	0	150.114	Inf	0.0241729	0	52.6796	Inf	0.0421935	0	54.2619	Inf	0.0444665	2.50025	203.828	6.34913	0.0394401	6.66941	110.563	4.05117	0.137856		qAG7.3, Septiningsih et al., 2013
DE genes in IR64, F291, F274-2a, 8753
LOC_Os10g13700	OS10G0204400	10	7438368	7444003	95.4641	425.706	2.15683	0.158793	6.25114	529.757	6.40507	0.000298448	3.91206	2899.15	9.53349	1.07e-06	4.57677	2949.02	9.33169	1.31e-06	76.6745	152.871	0.995494	0.483566	4.76387	793.846	7.38058	4.02e-05	Os10g0204400 protein; Phosphoenolpyruvate carboxykinase, putative, expressed [Source:UniProtKB/TrEMBL;Acc:Q7G466]
DE genes in IR64, F291, 8391, 8753
LOC_Os01g71670	OS01G0944700	1	41533329	41535615	674.124	71.5789	-3.23541	0.0628793	637.617	51.3293	-3.63484	0.0288912	703.193	1.77572	-8.62938	4.77e-05	266.597	34.2086	-2.96223	0.0649999	535.055	4.63245	-6.85177	0.000694242	1698.79	11.0563	-7.26349	0.000164335	Beta 1,3-glucanase; Os01g0944700 protein; Putative beta 1,3-glucanase; Putative endo-1,3-beta-glucanase; cDNA clone:J023041A20, full insert sequence [Source:UniProtKB/TrEMBL;Acc:Q94CR1]
LOC_Os04g41680	OS04G0494100	4	24708801	24709910	610.971	46.8223	-3.70584	0.0840472	306.306	13.5587	-4.49769	0.0337921	191.691	1.77572	-6.75424	0.0049937	82.3818	15.3349	-2.42551	0.217294	98.3434	0	-10000000000	0.00900099	773.652	9.58217	-6.33519	0.00481932	Chitinase 5 [Source:UniProtKB/Swiss-Prot;Acc:Q7Y1Z0]
LOC_Os06g44300	OS06G0653000	6	26736608	26744116	161.555	220.657	0.44978	0.790868	82.8276	769.939	3.21656	0.0267297	161.373	1662.66	3.36503	0.0202937	256.299	721.919	1.49401	0.262109	71.674	2643.58	5.2049	0.000987481	108.616	1878.1	4.11197	0.00534948	Os06g0653000 protein; Putative Gl1 [Source:UniProtKB/TrEMBL;Acc:Q67WQ7]
LOC_Os11g37970	OS11G0592200	11	22511506	22512374	537.537	31.753	-4.0814	0.0552917	328.185	11.6217	-4.81961	0.0222931	415.657	4.14334	-6.64846	0.00354782	137.303	14.1553	-3.27795	0.0960868	175.018	0	-10000000000	0.00326269	657.414	9.58217	-6.10031	0.00523699	Os11g0592200 protein; Pathogenesis-related protein; Win1, putative, expressed; cDNA clone:J023075A19, full insert sequence [Source:UniProtKB/TrEMBL;Acc:Q941F5]	qAG11, Jiang et al., 2006
DE genes in IR64, F274-2a, 8391, 8753
LOC_Os07g35390	OS07G0538400	7	21168993	21170678	51.4038	308.381	2.58477	0.132475	26.5674	291.512	3.45583	0.0393064	89.9775	632.155	2.81264	0.0794562	64.0748	1139.5	4.1525	0.0122456	10.8344	532.731	5.61971	0.00221907	166.735	1475.65	3.14572	0.0478345	Os07g0538400 protein [Source:UniProtKB/TrEMBL;Acc:Q0D5S8]
LOC_Os07g35810	OS07G0542600	7	21441037	21444823	193.866	1024.17	2.40133	0.132077	14.0651	317.66	4.4973	0.00736285	164.307	749.352	2.18925	0.140782	33.1816	962.559	4.85842	0.00286795	25.0025	864.723	5.11209	0.00242893	103.852	1736.58	4.06365	0.00944706	cDNA, clone: J100053G09, full insert sequence [Source:UniProtKB/TrEMBL;Acc:B7FA79]
DE Genes specifically responsive in four extremely tolerant genotypes (F291, F274-2a, 8391, 8753)
LOC_Os01g14410	OS01G0246400	1	8061858	8062892	77.84	730.858	3.23101	0.0826019	56.2603	400.949	2.83323	0.105253	18.5823	568.229	4.93447	0.00937111	10.2977	246.538	4.58141	0.0148622	20.8355	677.881	5.02392	0.00878948	40.0165	611.784	3.93436	0.0276779	Os01g0246400 protein; Putative early light-induced protein; Putative low molecular early light-inducible protein; Uncharacterized protein; cDNA clone:001-109-E06, full insert sequence [Source:UniProtKB/TrEMBL;Acc:Q9XHY5]
LOC_Os01g24030	OS01G0342900	1	13539772	13541921	45.5291	614.071	3.75355	0.0575353	1.56279	0	-10000000000	0.826017	3.91206	137.914	5.13969	0.0144583	1.14419	110.883	6.59856	0.00602711	4.16709	809.134	7.60119	0.000767774	20.0082	1173.45	5.87401	0.00382087	Os01g0342900 protein; Putative adenosine monophosphate binding protein 1 AMPBP1 [Source:UniProtKB/TrEMBL;Acc:Q8LQW9]
LOC_Os01g24560	OS01G0347600	1	13842272	13843744	0	36.5967	Inf	0.0680742	0	2.90543	Inf	0.651819	8.80214	704.367	6.32233	0.0151971	0	74.3152	Inf	0.0171793	0	193.019	Inf	0.00434057	0.952773	214.493	7.81458	0.00872169	Putative cysteine protease [Source:UniProtKB/TrEMBL;Acc:Q94CN8]
LOC_Os01g24700	OS01G0348800	1	13899523	13900729	11.7494	17.7602	0.596054	0.843274	1.56279	5.81086	1.89463	0.610943	25.4284	552.839	4.44235	0.0215518	12.5861	248.897	4.30564	0.0253049	0.833418	1965.7	11.2037	2.72e-05	1.90555	93.6104	5.61839	0.0110119	Os01g0348800 protein [Source:UniProtKB/TrEMBL;Acc:Q0JMY9]
LOC_Os01g72610	OS01G0956200	1	42128337	42130205	489.07	890.699	0.864897	0.590935	42.1952	276.984	2.71465	0.0706452	48.9008	790.785	4.01536	0.00965227	40.0467	1135.96	4.82608	0.00231567	106.678	1463.85	3.77844	0.0145922	133.388	1640.76	3.62066	0.0156129	Os01g0956200 protein; Putative glycosyltransferase; cDNA clone:001-206-F02, full insert sequence [Source:UniProtKB/TrEMBL;Acc:Q8RYJ1]
LOC_Os02g12380	OS02G0215200	2	6447078	6453167	44.0604	420.324	3.25395	0.0658236	18.7534	20.338	0.117024	0.995024	51.8348	1765.06	5.08965	0.0043754	14.8745	192.276	3.69226	0.030463	20.8355	872.444	5.38795	0.00335644	45.7331	921.362	4.33246	0.0114666	Histone deacetylase [Source:UniProtKB/TrEMBL;Acc:Q6YV04]
LOC_Os02g37490	OS02G0587000	2	22626274	22627180	52.8725	264.788	2.32425	0.0610162	21.879	14.5272	-0.590795	0.689386	14.6702	6735.88	8.84283	4.33e-09	13.7303	883.525	6.00784	8.46e-06	32.5033	52978.2	10.6706	2.51e-11	17.1499	7989.32	8.86373	3.17e-09	Glycine-rich protein; Os02g0587000 protein; Putative glycine-rich protein; cDNA clone:001-103-D05, full insert sequence [Source:UniProtKB/TrEMBL;Acc:Q6YY09]	qAG2-1, Angaji et al., 2010
LOC_Os03g14642					425.917	71.5789	-2.57297	0.0809259	268.799	61.9825	-2.1166	0.122129	4013.78	5.91905	-9.40538	2.75e-07	3492.07	141.553	-4.62467	0.00155634	569.225	1.54415	-8.52604	1.84e-05	1488.23	5.89672	-7.97947	4.36e-06
LOC_Os03g25280	OS03G0368000	3	14436127	14437395	2.93736	8.0728	1.45855	0.602438	4.68836	13.5587	1.53206	0.459009	15.6483	2445.16	7.28778	4.79e-05	0	66.0579	Inf	0.00119055	4.16709	3536.1	9.7289	1.26e-06	1.90555	850.602	8.80213	1.11e-05	Class III peroxidase 42; Peroxidase family protein, expressed; Putative peroxidase [Source:UniProtKB/TrEMBL;Acc:Q5U1Q1]
LOC_Os03g25300	OS03G0368300	3	14445504	14446878	1.46868	39.8258	4.76111	0.110732	0	0	NA	NA	9.78016	588.354	5.91068	0.0152467	0	265.411	Inf	0.00243187	0	373.684	Inf	0.00119484	9.52773	241.765	4.66533	0.0429218	Os03g0368300 protein; Peroxidase family protein, expressed; Putative peroxidase; cDNA clone:J033068K22, full insert sequence [Source:UniProtKB/TrEMBL;Acc:Q10KW1]
LOC_Os03g57240	OS03G0786400	3	32645695	32646899	2104.62	677.577	-1.6351	0.225026	2272.29	1149.58	-0.983038	0.428205	1682.19	165.733	-3.3434	0.0124765	1987.46	325.571	-2.60988	0.0401035	2156.05	138.973	-3.95551	0.00424688	2653.47	166.582	-3.99358	0.00318658	Drought and salt tolerance protein; Expressed protein [Source:UniProtKB/TrEMBL;Acc:Q10CE2]
LOC_Os03g60620	OS03G0821100	3	34446327	34450665	1979.78	806.204	-1.29612	0.315443	2770.82	1294.85	-1.09752	0.36342	3584.43	74.58	-5.58681	9.17e-05	3982.93	70.7764	-5.81442	4.67e-05	2554.43	185.298	-3.78508	0.00451516	2396.22	165.845	-3.85285	0.00321032	Heat shock cognate 70 kDa protein 2, putative, expressed; Heat shock protein cognate 70; Os03g0821100 protein; cDNA clone:J023030D03, full insert sequence [Source:UniProtKB/TrEMBL;Acc:Q84TA1]
LOC_Os04g03810	OS04G0127300	4	1717097	1720332	590.409	371.887	-0.66685	0.607576	589.17	101.69	-2.53451	0.0565557	5551.22	286.482	-4.27629	0.00246272	568.664	80.2132	-2.82566	0.0319118	3859.56	80.2957	-5.58697	0.000209168	1191.92	200.488	-2.5717	0.0481188	Os04g0127300 protein [Source:UniProtKB/TrEMBL;Acc:Q0JF91]
LOC_Os04g22900	OS04G0295400	4	12989808	12996145	246.738	15.0692	-4.0333	0.0996731	221.916	21.3065	-3.38065	0.135928	118.34	4.14334	-4.836	0.0479205	144.168	2.35921	-5.9333	0.0248598	232.524	0	-10000000000	0.00607528	354.432	0	-10000000000	0.00127745	OSJNBa0041M21.2 protein; Os04g0295400 protein [Source:UniProtKB/TrEMBL;Acc:Q7XVT4]
LOC_Os05g39320	OS05G0469800	5	23065514	23068193	51.4038	275.014	2.41956	0.260993	0	18.4011	Inf	0.0940906	10.7582	798.48	6.21375	0.00668077	0	150.99	Inf	0.00290124	2.50025	231.622	6.53356	0.00732765	8.57496	498.273	5.86066	0.00917678	Putative pyruvate decarboxylase [Source:UniProtKB/TrEMBL;Acc:Q6AUJ8]
LOC_Os06g21270	OS06G0317600	6	12297993	12298980	13056.6	2601.06	-2.3276	0.0702336	1306.49	1468.21	0.168364	0.888603	239.614	24.2681	-3.30358	0.00928581	156.754	1173.71	2.9045	0.0159174	1263.46	37.0596	-5.09139	0.000203033	7616.47	703.184	-3.43715	0.00526389	Os06g0317600 protein; Putative glycine rich protein [Source:UniProtKB/TrEMBL;Acc:Q5ZAB3]
LOC_Os07g35480	OS07G0539100	7	21223272	21225870	541.943	2453.59	2.17868	0.0871435	59.3859	174.326	1.5536	0.203906	651.359	4889.14	2.90806	0.0177209	92.6796	928.35	3.32435	0.00696811	180.018	11718.5	6.02451	1.89e-05	501.159	6927.91	3.78908	0.00249001	Os07g0539100 protein; Putative beta-1,3-glucanase; cDNA clone:001-046-A08, full insert sequence; cDNA clone:J013097O21, full insert sequence [Source:UniProtKB/TrEMBL;Acc:Q6YVU7]
LOC_Os07g35740	OS07G0541800	7	21407942	21411687	42.5917	180.831	2.086	0.293637	12.5023	86.1944	2.7854	0.151195	14.6702	519.101	5.14505	0.0108469	2.28838	1101.75	8.91125	0.000230736	5.83393	350.522	5.90889	0.0056105	22.8666	491.639	4.42629	0.0216785	Os07g0541800 protein; Putative serine/threonine-specific protein kinase [Source:UniProtKB/TrEMBL;Acc:Q7F271]
LOC_Os07g46280	OS07G0656200	7	27615673	27618594	555.161	321.836	-0.786581	0.574559	1211.16	460.995	-1.39357	0.308174	1301.74	94.1129	-3.7899	0.0107229	1784.94	232.382	-2.9413	0.0361827	1005.94	94.1931	-3.41677	0.021281	1215.74	148.155	-3.03665	0.0322457		qAG7, Jiang et al., 2004; qAG7-2, Angaji et al., 2010
LOC_Os08g43600	OS08G0549600	8	27576171	27576997	210.021	13.9929	-3.90777	0.070214	678.249	283.764	-1.25712	0.495276	133.988	2.36762	-5.82252	0.0108336	303.211	10.6165	-4.83595	0.0217929	475.882	12.3532	-5.26765	0.0164691	121.955	3.68545	-5.04836	0.0207557	Os08g0549600 protein; Putative uncharacterized protein OJ1479_B11.14 [Source:UniProtKB/TrEMBL;Acc:Q6ZJI7]
LOC_Os09g36700	OS09G0538000	9	21165219	21167647	2355.76	1676.99	-0.490319	0.657705	9973.7	2485.11	-2.00482	0.0742206	4297.4	346.856	-3.63105	0.00236034	6461.25	678.274	-3.25188	0.00472665	7677.45	46.3245	-7.37271	1.88e-07	35851	1141.01	-4.97362	6.75e-05	Os09g0538000 protein; Putative RNase S-like protein [Source:UniProtKB/TrEMBL;Acc:Q69JF3]
LOC_Os10g40430	OS10G0551800	10	21658192	21658818	95.4641	382.113	2.00097	0.161259	309.432	332.188	0.102378	0.943814	429.349	3150.71	2.87545	0.0331132	100.689	1098.21	3.44718	0.0112356	284.196	5356.65	4.23638	0.00323431	128.624	783.526	2.60682	0.0483816	Os10g0551800 protein; Protease inhibitor/seed storage/LTP family protein, expressed; Putative lipid transfer protein [Source:UniProtKB/TrEMBL;Acc:Q7XCD3]
LOC_Os10g40440	OS10G0551900	10	21662454	21663219	63.1532	224.424	1.8293	0.140423	25.0046	65.8564	1.39713	0.257203	44.0107	40591.1	9.84909	2.07e-10	18.3071	1470.97	6.32822	3.22e-06	44.1712	87412.7	10.9505	1.22e-11	42.8748	9103.06	7.73008	5.6e-08	Cortical cell delineating protein, putative, expressed; Os10g0551900 protein; Putative lipid transfer protein [Source:UniProtKB/TrEMBL;Acc:Q9FWP0]
LOC_Os10g40520	OS10G0552700	10	21693876	21694502	1132.35	2365.87	1.06305	0.415253	3.12557	4.84238	0.631598	0.943151	271.888	4106.05	3.91666	0.00239337	109.842	3588.36	5.02982	0.000172051	470.048	9130.55	4.27982	0.00121961	769.841	3985.44	2.37211	0.0473661	Cortical cell delineating protein, putative, expressed; Os10g0552700 protein; Putative lipid transfer protein; cDNA clone:001-111-A12, full insert sequence [Source:UniProtKB/TrEMBL;Acc:Q9FWP8]
LOC_Os11g07120					342.202	853.026	1.31774	0.370651	1.56279	0	-10000000000	0.807313	15.6483	481.811	4.94439	0.00137992	67.5073	1513.43	4.48664	0.00223196	74.1742	2975.57	5.32611	0.000605279	141.963	3649.33	4.68404	0.00154253
LOC_Os12g42190	OS12G0616400	12	26155007	26158687	684.405	118.939	-2.52462	0.097111	1439.33	795.119	-0.856149	0.52707	1975.59	61.5581	-5.00419	0.00140584	1240.3	96.7277	-3.68062	0.0115705	1038.44	44.7803	-4.53541	0.00366782	694.572	86.9766	-2.99742	0.0352658	Transcription factor PCF8 [Source:UniProtKB/Swiss-Prot;Acc:Q2QM59]	qAG12, Septiningsih et al., 2013
DE genes in Nipponbare, IR64, F291
LOC_Os12g28880	OS12G0473900	12	17070764	17071549	306.954	5.38187	-5.83377	0.0492034	246.92	2.90543	-6.40915	0.032454	87.0434	0	-10000000000	0.0142997	24.028	0	-10000000000	0.0922505	49.1717	1.54415	-4.99294	0.127961	38.1109	0.73709	-5.69222	0.0751111	Protease inhibitor/seed storage/LTP family protein [Source:UniProtKB/TrEMBL;Acc:Q2QR41]
DE genes in Nipponbare, IR64, F274-2a
LOC_Os02g08440	OS02G0181300	2	4544306	4544841	274.643	12325.6	5.48795	3.16e-05	57.8231	354.463	2.61592	0.0260612	9894.59	13996.2	0.500323	0.650951	3373.08	25076.1	2.89417	0.010582	118.345	537.364	2.1829	0.059374	4075.01	3720.83	-0.13118	0.901742		qAG2.1, Baltazar et al., 2014
LOC_Os02g56380	OS02G0807900	2	34516622	34519474	167.429	1763.1	3.39649	0.0300597	25.0046	222.75	3.15516	0.0396513	497.81	1627.15	1.70868	0.228453	137.303	1255.1	3.19237	0.0282695	49.1717	276.403	2.49087	0.0938991	443.04	852.813	0.944794	0.48925
LOC_Os08g04340	OS08G0137800	8	2129613	2130595	2.93736	1058.61	8.49344	0.000121894	0	22.275	Inf	0.0395913	375.558	2045.62	2.44543	0.126541	35.47	898.86	4.66343	0.00695451	1.66684	10.809	2.69705	0.245111	17.1499	27.2723	0.669236	0.696945	Os08g0137800 protein; cDNA clone:001-110-D06, full insert sequence [Source:UniProtKB/TrEMBL;Acc:Q0J844]
DE genes in Nipponbare, IR64, 8753
LOC_Os03g22634	OS03G0348200	3	13063312	13070842	198.272	0	-10000000000	0.00859667	214.102	0	-10000000000	0.0112384	9.78016	0	-10000000000	0.13336	27.4606	1.17961	-4.54099	0.166483	20.002	0	-10000000000	0.162383	203.893	0	-10000000000	0.00860707	Os03g0348200 protein [Source:UniProtKB/TrEMBL;Acc:Q0DRX1]
DE genes in Nipponbare, F291, F274-2a
LOC_Os01g03680	OS01G0127600	1	1515837	1516714	48.4664	3072.51	5.98629	0.000274949	3.12557	1.93695	-0.69033	1	4982.01	390.065	-3.67494	0.0112828	609.854	29.4902	-4.37016	0.00341087	138.347	80.2957	-0.784901	0.584244	3.81109	11.0563	1.5366	0.392528	Os01g0127600 protein; Putative Bowman Birk trypsin inhibitor; Uncharacterized protein; cDNA clone:001-125-D07, full insert sequence; cDNA clone:J033085I16, full insert sequence [Source:UniProtKB/TrEMBL;Acc:Q9FTR9]
LOC_Os01g06590	OS01G0159300	1	3100294	3105226	633.001	4376	2.78933	0.0287771	210.976	390.296	0.88749	0.451696	2060.68	10901.7	2.40336	0.0450101	1052.66	7468.09	2.8267	0.0175347	271.694	691.779	1.34833	0.256	1282.43	1510.3	0.235949	0.835054	Os01g0159300 protein; Zinc finger protein; cDNA clone:J033058G15, full insert sequence [Source:UniProtKB/TrEMBL;Acc:Q0JQI1]
LOC_Os02g45420	OS02G0676800	2	27621222	27622912	4.40604	264.25	5.90628	0.00316857	18.7534	4.84238	-1.95336	0.307496	176.043	1882.85	3.41892	0.0354626	96.1121	2250.69	4.5495	0.00665579	15.0015	15.4415	0.0417022	1	28.5832	104.667	1.87256	0.230263	Os02g0676800 protein; Putative DRE binding factor 2; cDNA, clone: J100032D11, full insert sequence [Source:UniProtKB/TrEMBL;Acc:Q6EP81]	qAG2, Septiningsih et al., 2013
LOC_Os02g52710	OS02G0765600	2	32248329	32250174	0	64.0443	Inf	0.0119632	0	0	NA	NA	2605.43	1.77572	-10.5189	2.48e-05	274.606	0	-10000000000	0.000471406	0.833418	0	-10000000000	1	0	2.94836	Inf	0.386078	Alpha-amylase [Source:UniProtKB/Swiss-Prot;Acc:P17654]
LOC_Os02g57350	OS02G0818900	2	35130674	35131877	2.93736	343.363	6.86907	0.00102148	4.68836	8.71629	0.894632	0.753251	4156.57	211.902	-4.29392	0.0103604	10.2977	100.267	3.28344	0.0495651	5.00051	13.8973	1.47466	0.462964	13.3388	86.2395	2.69272	0.09703	Os02g0818900 protein; Putative uncharacterized protein OJ1202_E07.12; cDNA clone:002-135-G02, full insert sequence [Source:UniProtKB/TrEMBL;Acc:Q6K9R5]
LOC_Os06g11400	OS06G0217700	6	6007466	6010097	445.01	22.0657	-4.33396	0.0449816	650.119	125.902	-2.3684	0.211747	177.999	3.55143	-5.64732	0.0112298	327.239	11.7961	-4.79397	0.021958	414.209	37.0596	-3.48244	0.0849236	50.497	11.0563	-2.19132	0.258868	Os06g0217700 protein; Putative uncharacterized protein P0644A02.3; cDNA clone:001-105-B04, full insert sequence [Source:UniProtKB/TrEMBL;Acc:Q69QC1]	qAG6, Septiningsih et al., 2013
LOC_Os08g24310	OS08G0331900	8	14675041	14676325	83.7147	1343.31	4.00417	0.0213842	26.5674	92.9738	1.80717	0.268391	195.603	1982.29	3.34117	0.0393924	41.1909	896.501	4.44391	0.00819188	10.8344	100.37	3.21163	0.0607562	22.8666	49.385	1.11083	0.483308	Os08g0331900 protein [Source:UniProtKB/TrEMBL;Acc:Q0J6D6]
LOC_Os09g30490	OS09G0482800	9	18618052	18618753	36.717	1648.47	5.48853	0.000586823	37.5069	88.1314	1.2325	0.382156	263.086	3992.99	3.92386	0.00641531	131.582	2543.23	4.27263	0.00302323	34.1702	217.725	2.6717	0.0604154	400.165	1070.99	1.42028	0.275087	Os09g0482800 protein; cDNA clone:001-123-B12, full insert sequence; cDNA clone:J033097N16, full insert sequence [Source:UniProtKB/TrEMBL;Acc:A3C020]
LOC_Os12g04204	OS12G0136500	12	1772560	1774555	3828.85	30972.7	3.01601	0.0136208	653.244	1630.91	1.31999	0.238189	4756.09	24233.8	2.34917	0.0401602	1549.24	24645.5	3.9917	0.000857776	1271.8	5602.17	2.13912	0.0637932	9550.6	43214.8	2.17786	0.0514134
DE genes in Nipponbare,F291, 8391
LOC_Os01g55940	OS01G0764800	1	32221378	32225121	5.87472	221.195	5.23465	0.026955	10.9395	12.5902	0.202754	0.988994	27.3844	1111.01	5.34237	0.0140294	22.8838	141.553	2.62894	0.178131	13.3347	305.741	4.51906	0.0355428	16.1971	215.967	3.737	0.0667277	Probable indole-3-acetic acid-amido synthetase GH3.2 [Source:UniProtKB/Swiss-Prot;Acc:P0C0M2]	qAG1-2, Angaji et al., 2010
LOC_Os03g14130	OS03G0245200	3	7675772	7677111	339.265	5.92006	-5.84066	0.0331905	107.832	26.1489	-2.04397	0.376719	42.0547	0	-10000000000	0.0200677	118.996	4.71842	-4.65646	0.0702846	431.711	1.54415	-8.12711	0.00925347	3.81109	2.21127	-0.78533	0.880534	Os03g0245200 protein; Proline-rich protein, putative, expressed; cDNA clone:001-100-E04, full insert sequence [Source:UniProtKB/TrEMBL;Acc:Q10P65]
LOC_Os12g14440	OS12G0247700	12	8239432	8241147	279.049	22.0657	-3.66064	0.0156377	3.12557	0	-10000000000	0.397534	11187.5	71.6205	-7.2873	8.49e-06	42.3351	7.07764	-2.58052	0.0869361	0	13.8973	Inf	0.0207961	20.961	14.0047	-0.581797	0.703412	Expressed protein; Mannose-specific jacalin-related lectin; Os12g0247700 protein [Source:UniProtKB/TrEMBL;Acc:Q306J3]
DE genes in Nipponbare, F291, 8753
LOC_Os01g01660	OS01G0106400	1	327128	328450	2316.11	181.907	-3.67043	0.0296687	85.9532	18.4011	-2.22376	0.161251	768.72	11.2462	-6.09495	0.000632369	116.708	140.373	0.266368	0.858857	238.358	478.686	1.00595	0.499039	1106.17	138.573	-2.99686	0.0497865	Os01g0106400 protein; Putative isoflavone reductase; cDNA clone:006-202-E10, full insert sequence; cDNA clone:J033103L17, full insert sequence [Source:UniProtKB/TrEMBL;Acc:Q9FTN5]
LOC_Os01g01840	OS01G0108400	1	455707	457425	82.246	0	-10000000000	0.0232631	1.56279	2.90543	0.894632	1	233.746	0	-10000000000	0.00791128	2.28838	1.17961	-0.956024	1	36.6704	0	-10000000000	0.102921	233.429	0	-10000000000	0.00916086	Putative uncharacterized protein P0482C06.19 [Source:UniProtKB/TrEMBL;Acc:Q8W0P3]
LOC_Os02g37690	OS02G0589400	2	22741593	22743361	5890.87	746.465	-2.98033	0.041696	523.533	892.936	0.770275	0.556638	262.108	29.5953	-3.14672	0.0247762	204.81	147.451	-0.474056	0.712903	644.232	154.415	-2.06077	0.130505	1652.11	232.92	-2.8264	0.0353733	Putative UDP-glucosyltransferase [Source:UniProtKB/TrEMBL;Acc:Q6YY41]	qAG2-1, Angaji et al., 2010
LOC_Os03g60509	OS03G0819600	3	34394508	34395638	12442.7	2166.74	-2.5217	0.0487965	2266.04	1475.96	-0.61852	0.586513	856.742	73.3962	-3.54508	0.0045907	699.101	859.933	0.298722	0.789179	2059.38	554.349	-1.89334	0.112552	9437.22	632.423	-3.8994	0.00171729	Chalcone--flavonone isomerase [Source:UniProtKB/Swiss-Prot;Acc:Q84T92]
LOC_Os04g53800	OS04G0630300	4	32059560	32062390	618.314	22.6039	-4.7737	0.0415826	378.194	46.4869	-3.02423	0.147709	51.8348	1.77572	-4.86745	0.0444882	19.4513	5.89803	-1.72156	0.45527	67.5069	6.1766	-3.45015	0.141453	514.498	0.73709	-9.44711	0.000982078	Os04g0630300 protein; cDNA clone:001-029-C03, full insert sequence [Source:UniProtKB/TrEMBL;Acc:Q0J9V0]
LOC_Os09g16449	OS09G0333500	9	10066564	10069846	226.177	2.15275	-6.71513	0.0373926	0	0	NA	NA	107.582	0.591905	-7.50585	0.0282469	64.0748	8.25724	-2.95602	0.272425	68.3403	0	-10000000000	0.055911	163.877	0	-10000000000	0.0114109
LOC_Os10g31440	OS10G0451900	10	16481078	16482112	0	182.984	Inf	0.0235975	1.56279	0	-10000000000	0.8571	0	287.074	Inf	0.0086939	0	18.8737	Inf	0.121769	0.833418	20.0739	4.59014	0.182627	0	157.737	Inf	0.0142023	Os10g0451900 protein [Source:UniProtKB/TrEMBL;Acc:Q0IXC0]
DE genes in Nipponbare, F274-2a, 8391
LOC_Os01g14440	OS01G0246700	1	8084184	8086980	133.65	4402.37	5.04175	0.000552067	43.758	215.97	2.30321	0.0802738	1894.42	3194.51	0.753842	0.544014	319.23	4095.59	3.68141	0.00514799	37.5038	477.142	3.66931	0.00759007	616.444	1300.23	1.07672	0.374728	Putative WRKY transcription factor 6 [Source:UniProtKB/TrEMBL;Acc:Q5NAL3]
LOC_Os01g38359	OS01G0564300	1	21525509	21549819	549.286	37.6731	-3.86595	0.0287628	262.548	1325.84	2.33626	0.137336	281.669	113.054	-1.31699	0.391318	73.2283	769.103	3.3927	0.0344883	43.3378	1.54415	-4.81074	0.032233	900.371	437.094	-1.04257	0.483758	Peptidyl-prolyl cis-trans isomerase [Source:UniProtKB/TrEMBL;Acc:Q656V1]	qAG1-2, Angaji et al., 2010
LOC_Os01g42380	OS01G0609300	1	24075070	24081389	277.58	5146.14	4.21251	0.00332155	159.404	227.592	0.513761	0.691844	1016.16	2944.14	1.53472	0.226578	241.425	2661.19	3.46243	0.00883582	62.5064	1104.07	4.14268	0.00326153	707.911	425.301	-0.735084	0.548105	Pleiotropic drug resistance protein 3 [Source:UniProtKB/Swiss-Prot;Acc:Q0JLC5]	qAG1,Jiang et al., 2004; qAG1-2, Angaji et al., 2010
LOC_Os01g55510	OS01G0760000	1	31981933	31982776	337.796	2585.99	2.93649	0.0302241	142.213	285.701	1.00645	0.421845	1041.59	1878.71	0.850957	0.489805	763.176	5675.09	2.89455	0.0215889	232.524	1852.98	2.9944	0.0225069	1498.71	1743.95	0.218639	0.855011		qAG1-2, Angaji et al., 2010
LOC_Os01g72009	OS01G0948600	1	41728692	41729581	1075.07	6239.74	2.53705	0.0408464	1495.59	1643.51	0.136065	0.908168	2180	5884.72	1.43265	0.210996	1537.79	7439.78	2.2744	0.0459405	1364.31	7218.9	2.40361	0.0432163	1484.42	3476.85	1.22788	0.27068
LOC_Os02g11859	OS02G0209300	2	6146113	6146678	51.4038	1278.19	4.63609	0.00936958	4.68836	52.2977	3.47959	0.0670109	240.592	1367.89	2.5073	0.112878	36.6142	890.603	4.60431	0.0067092	8.33418	97.2814	3.54505	0.0426584	435.417	329.479	-0.402212	0.786457	Putative uncharacterized protein [Source:UniProtKB/TrEMBL;Acc:A3A4F2]
LOC_Os02g41670	OS02G0626600	2	24993130	24995329	14.6868	3523.51	7.90635	8.02e-06	1.56279	25.1804	4.01011	0.0539753	1081.69	2015.44	0.897812	0.500133	52.6328	1982.92	5.23552	0.000566256	4.16709	64.8543	3.96009	0.0150706	230.571	1140.28	2.3061	0.0857
LOC_Os02g42850	OS02G0641300	2	25759841	25762800	138.056	1362.15	3.30256	0.0311509	73.4509	188.853	1.36241	0.335959	677.765	1814.19	1.42047	0.304214	97.2563	1427.32	3.87538	0.00840881	130.013	1121.05	3.10812	0.0345216	224.854	978.855	2.1221	0.123445
LOC_Os02g48320	OS02G0713700	2	29571841	29573542	111.62	1293.26	3.53435	0.0204477	67.1998	165.61	1.30126	0.354115	543.777	2394.26	2.13849	0.123141	296.346	2082	2.81262	0.042275	52.5054	656.263	3.64374	0.0144705	388.731	806.376	1.05268	0.427293	DNA-binding protein-like; Os02g0713700 protein; cDNA, clone: J065121M03, full insert sequence [Source:UniProtKB/TrEMBL;Acc:Q6ZFU2]	qAG2, Jiang et al., 2004; qAG2, Septiningsih et al., 2013
LOC_Os02g51970	OS02G0756200	2	31824134	31825261	1.46868	1418.12	9.91525	6.8e-06	1.56279	17.4326	3.47959	0.126936	632.776	1454.9	1.20116	0.400365	99.5447	1856.7	4.22125	0.00625017	6.66735	125.076	4.22955	0.0116012	172.452	988.437	2.51896	0.0813863	Putative phi-1 [Source:UniProtKB/TrEMBL;Acc:Q6Z680]
LOC_Os03g09900	OS03G0194900	3	4923937	4926075	847.428	6382.36	2.91293	0.0265307	120.334	368.99	1.61653	0.18712	1593.19	3428.31	1.10558	0.356253	266.597	4339.77	4.02489	0.00179218	225.856	2334.75	3.36979	0.00918328	1837.9	1543.47	-0.251884	0.82721	Membrane protein, putative, expressed; Os03g0194900 protein; Putative membrane protein; cDNA clone:001-021-H11, full insert sequence; cDNA clone:006-204-B05, full insert sequence [Source:UniProtKB/TrEMBL;Acc:Q8H7W7]
LOC_Os03g49380	OS03G0700700	3	28106903	28113300	1241.03	9526.45	2.9404	0.0163029	772.016	1602.83	1.05392	0.345632	5285.2	12506.4	1.24263	0.266812	1319.25	8100.36	2.61826	0.020707	960.098	5994.39	2.64236	0.0245463	1784.54	7759.34	2.12038	0.0580821	Probable linoleate 9S-lipoxygenase 4 [Source:UniProtKB/Swiss-Prot;Acc:Q53RB0]	qAG3-1, Angaji et al., 2010
LOC_Os05g44770	OS05G0522600	5	26022305	26025796	107.214	3150.01	4.8768	0.0013401	51.5719	115.249	1.16009	0.395308	1060.17	2406.09	1.1824	0.36459	361.565	2619.91	2.85719	0.0316212	41.6709	883.253	4.40571	0.00276635	339.187	672.963	0.988445	0.436687	Putative uncharacterized protein OJ1087_C03.13; Putative uncharacterized protein OSJNBa0075A10.6 [Source:UniProtKB/TrEMBL;Acc:Q5W675]
LOC_Os06g11210	OS06G0215600	6	5884568	5886141	48.4664	1247.52	4.68593	0.0121845	31.2557	148.177	2.24513	0.185921	81.1753	634.522	2.96656	0.0782896	33.1816	582.725	4.13436	0.0175826	9.1676	735.015	6.32509	0.0013334	244.863	177.639	-0.463028	0.767046	Putative 12-oxophytodienoate reductase 5 [Source:UniProtKB/Swiss-Prot;Acc:Q69TI0]	qAG6, Septiningsih et al., 2013
LOC_Os06g11290	OS06G0216300	6	5918167	5919685	23.4989	4080	7.43983	2.72e-05	15.6279	25.1804	0.688181	0.692169	641.578	1480.35	1.20625	0.379111	170.485	1646.73	3.27189	0.0213783	22.5023	196.107	3.1235	0.0370355	39.0637	185.747	2.24944	0.108498		qAG6, Septiningsih et al., 2013
LOC_Os06g35700	OS06G0549900	6	20832520	20834491	2.93736	315.378	6.74642	0.0097246	21.879	283.764	3.69707	0.0827845	10.7582	164.55	3.93502	0.0691021	8.00935	611.036	6.25343	0.00737889	1.66684	60.2218	5.1751	0.0383168	57.1664	348.643	2.60851	0.18781	Os06g0549900 protein; cDNA clone:002-145-B05, full insert sequence [Source:UniProtKB/TrEMBL;Acc:Q0DBM6]
LOC_Os07g23570	OS07G0418500	7	13323931	13326242	0	966.584	Inf	0.000485211	0	0.968477	Inf	1	120.296	228.475	0.925451	0.64019	12.5861	471.842	5.2284	0.0189274	0	24.7064	Inf	0.0343104	5.71664	34.6432	2.59933	0.228126	Os07g0418500 protein; Putative cytochrome P450; cDNA clone:J013166A09, full insert sequence [Source:UniProtKB/TrEMBL;Acc:Q8LHV0]	qAG7, Baltazar et al., 2014
LOC_Os07g46852	OS07G0663800	7	28004961	28006171	688.811	5838.79	3.08349	0.0155688	70.3254	333.156	2.24408	0.0642448	3631.37	2427.4	-0.581101	0.609216	1203.69	8350.43	2.79439	0.0179698	260.86	2413.5	3.20978	0.00990621	3931.14	4104.12	0.0621228	0.956456	Os07g0663800 protein; Putative sex determination protein tasselseed 2; cDNA clone:001-040-G03, full insert sequence [Source:UniProtKB/TrEMBL;Acc:Q7XAN4]	qAG7, Jiang et al., 2004; qAG7-2, Angaji et al., 2010
LOC_Os07g48710	OS07G0686600	7	29171078	29172225	52.8725	845.492	3.9992	0.0177427	20.3162	36.8021	0.857157	0.614549	420.547	1299.82	1.62798	0.274217	184.215	1912.14	3.37573	0.0280192	25.0025	350.522	3.80936	0.020006	122.908	429.723	1.80583	0.218646	Os07g0686600 protein; Putative uncharacterized protein OJ1150_E04.113; Putative uncharacterized protein OJ1200_C08.117; cDNA clone:002-144-B10, full insert sequence [Source:UniProtKB/TrEMBL;Acc:Q8LIG8]	qAG7, Jiang et al., 2004; qAG7-2, Angaji et al., 2010
LOC_Os08g35110	OS08G0452500	8	22136791	22137705	117.494	1469.25	3.64442	0.0130626	204.725	485.207	1.24491	0.345228	437.173	1519.42	1.79724	0.1744	223.117	4578.05	4.35886	0.00220239	121.679	1155.02	3.24677	0.020845	188.649	1049.62	2.47608	0.0617717	Auxin-induced protein-related-like protein; Os08g0452500 protein; cDNA clone:002-114-F10, full insert sequence; cDNA clone:J033093K08, full insert sequence [Source:UniProtKB/TrEMBL;Acc:Q6ZKQ7]
LOC_Os12g05440	OS12G0150200	12	2467929	2469700	5.87472	1281.96	7.76962	0.000113857	1.56279	2.90543	0.894632	1	340.349	342.713	0.00998432	1	117.852	1905.06	4.01479	0.011901	2.50025	54.0452	4.43402	0.0191969	915.615	482.057	-0.925538	0.521558	Cytochrome P450 family protein, expressed; cDNA clone:002-105-H01, full insert sequence [Source:UniProtKB/TrEMBL;Acc:Q2QXN4]
DE genes in Nipponbare, F274-2a, 8753
LOC_Os01g63690	OS01G0855600	1	36942716	36944585	79.3087	4764.03	5.90856	2.77e-05	92.2043	201.443	1.12747	0.34421	2682.7	6656.57	1.31109	0.258742	1283.78	11319.5	3.14034	0.00870278	166.684	853.914	2.35698	0.0519403	685.997	4721.06	2.78284	0.0190869	Os01g0855600 protein; Putative nematode-resistance protein; Uncharacterized protein; cDNA clone:J013095E24, full insert sequence [Source:UniProtKB/TrEMBL;Acc:Q7E5I4]	qAG1-2, Angaji et al., 2010
LOC_Os02g40100	OS02G0614600	2	24276488	24280992	4643.96	623.221	-2.89754	0.0408596	1501.84	1164.11	-0.367502	0.766194	80.1973	53.8634	-0.574249	0.65924	61.7864	418.76	2.76076	0.0349975	1693.51	342.801	-2.30457	0.0811069	3305.17	325.057	-3.34596	0.0118666	Os02g0614600 protein; Transport protein-like [Source:UniProtKB/TrEMBL;Acc:Q6K5X7]	qAG2-1, Angaji et al., 2010
LOC_Os02g46690	OS02G0694100	2	28512035	28514171	57.2785	738.393	3.68832	0.0494054	34.3813	74.5727	1.11702	0.525549	67.4831	479.443	2.82876	0.102644	58.3538	629.91	3.43225	0.0477703	36.6704	230.078	2.64944	0.131902	54.3081	1043.72	4.26442	0.0178732	Os02g0694100 protein; Putative uncharacterized protein P0017H11.21 [Source:UniProtKB/TrEMBL;Acc:Q6Z891]	qAG2, Septiningsih et al., 2013
LOC_Os03g07170	OS03G0168000	3	3674285	3678314	7.3434	435.393	5.88973	0.00322112	39.0696	67.7934	0.795096	0.64003	30.3185	153.895	2.34368	0.156882	10.2977	1212.64	6.87968	0.000430392	17.5018	38.6037	1.14124	0.512809	32.3943	2196.53	6.08334	0.00109904	Lactose permease, putative, expressed; Os03g0168000 protein; Putative sugar transport protein; cDNA clone:J023144O03, full insert sequence [Source:UniProtKB/TrEMBL;Acc:Q8S7U2]
LOC_Os03g18220	OS03G0293500	3	10217810	10220748	2990.23	23038.7	2.94573	0.0147173	1803.45	2659.44	0.560358	0.610579	3061.19	13364.6	2.12626	0.0589026	3247.22	17209.3	2.40591	0.0299127	3327.01	6801.98	1.03173	0.351637	4083.59	22768	2.4791	0.0266085	Pyruvate decarboxylase 2 [Source:UniProtKB/Swiss-Prot;Acc:Q10MW3]
LOC_Os07g47620	OS07G0673400	7	28468527	28469554	102.808	2574.69	4.64638	0.00461809	54.6975	50.3608	-0.119174	0.950055	200.493	331.467	0.725311	0.61222	148.745	1550	3.38136	0.0222001	35.0036	219.269	2.64713	0.0805652	201.988	1508.09	2.90038	0.0464257	Os07g0673400 protein; Universal stress protein USP1-like protein; cDNA clone:001-125-F10, full insert sequence [Source:UniProtKB/TrEMBL;Acc:Q8H454]	qAG7, Jiang et al., 2004; qAG7-2, Angaji et al., 2010
DE genes in Nipponbare, 8391, 8753
LOC_Os01g03340	OS01G0124200	1	1347665	1348723	732.871	16675.7	4.50805	0.00038419	900.164	2479.3	1.46167	0.188419	23210.3	20880	-0.152638	0.884744	14127.3	19125	0.436966	0.679813	1595.16	9782.18	2.61645	0.0243315	1555.88	9977.98	2.68102	0.0176477	Bowman-Birk type proteinase inhibitor A; Os01g0124200 protein; cDNA clone:001-035-D09, full insert sequence; cDNA clone:006-202-G03, full insert sequence; cDNA clone:J013096H09, full insert sequence [Source:UniProtKB/TrEMBL;Acc:A5HEI2]
LOC_Os01g03360	OS01G0124401	1	1353705	1354767	88.1208	10746	6.9301	8.64e-07	234.418	881.314	1.91057	0.0926475	12283.9	8028.6	-0.613545	0.574523	7610.02	11856.2	0.639672	0.549001	164.183	2044.45	3.63833	0.00279537	731.73	7325.2	3.32348	0.00439405	Bowman-Birk type bran trypsin inhibitor [Source:UniProtKB/Swiss-Prot;Acc:Q0JR25]
LOC_Os01g21630	OS01G0319000	1	12117107	12123026	778.4	26.9093	-4.85433	0.0216458	445.394	126.87	-1.81173	0.315106	11.7362	4.73524	-1.30945	0.543129	13.7303	27.1309	0.982575	0.618421	485.049	9.26489	-5.71021	0.00838646	670.752	14.7418	-5.5078	0.00747409	Os01g0319000 protein; Putative pectinacetylesterase; Uncharacterized protein [Source:UniProtKB/TrEMBL;Acc:Q94D71]
LOC_Os01g58039					227.645	27.4475	-3.05204	0.0329109	150.027	43.5815	-1.78344	0.171135	39.1206	24.86	-0.654102	0.627523	110.987	77.854	-0.511543	0.685913	1270.13	41.692	-4.92906	0.000672874	12710	1132.91	-3.48786	0.00813488
LOC_Os01g68050	OS01G0908600	1	39562727	39565686	1954.81	89.339	-4.4516	0.00820344	1354.94	228.561	-2.56758	0.0840658	23.4724	18.3491	-0.355258	0.836005	16.0187	55.4415	1.79121	0.241014	816.75	30.883	-4.72501	0.00427787	1807.41	20.6385	-6.45244	0.000203428	Proline transport protein-like; Putative betaine/proline transporter; Uncharacterized protein; cDNA, clone: J065200A10, full insert sequence [Source:UniProtKB/TrEMBL;Acc:Q8L431]	qAG1-2, Angaji et al., 2010
LOC_Os01g71474	OS01G0942300	1	41398051	41398544	1530.36	134.547	-3.5077	0.0440848	1100.2	312.818	-1.81437	0.24093	36.1866	5.32715	-2.76402	0.109902	50.3445	74.3152	0.561824	0.720728	644.232	13.8973	-5.5347	0.00269255	844.157	14.0047	-5.91353	0.00112093	Os01g0942300 protein [Source:UniProtKB/TrEMBL;Acc:Q0JG51]
LOC_Os02g10120	OS02G0194700	2	5276686	5282626	121.9	0.538187	-7.82338	0.0161327	81.2648	6.77934	-3.58342	0.156974	26.4064	2.36762	-3.47938	0.187124	33.1816	0	-10000000000	0.0542891	177.518	0	-10000000000	0.0131194	553.561	5.89672	-6.55269	0.0161962	Lipoxygenase [Source:UniProtKB/TrEMBL;Acc:Q6H7Q6]	qAG2.1, Baltazar et al., 2014
LOC_Os02g10350	OS02G0197200	2	5442081	5447353	1693.39	71.0407	-4.57512	0.0221923	73.4509	87.1629	0.246934	0.900287	48.9008	17.1652	-1.51037	0.3981	54.9212	41.2862	-0.411704	0.820898	399.207	16.9856	-4.55475	0.0205478	549.75	31.6949	-4.11646	0.0262431	Os02g0197200 protein; Putative seven transmembrane protein Mlo7 [Source:UniProtKB/TrEMBL;Acc:Q6H7L8]	qAG2.1, Baltazar et al., 2014
LOC_Os02g11700	OS02G0207400	2	6017329	6018933	1373.22	73.7316	-4.21913	0.0341616	648.556	248.899	-1.38167	0.420558	12.7142	2.95953	-2.103	0.315333	8.00935	43.6454	2.44607	0.196149	170.851	3.0883	-5.78978	0.00984273	401.118	20.6385	-4.28061	0.0231542	Putative flavonoid glucosyl-transferase [Source:UniProtKB/TrEMBL;Acc:Q6H8F6]
LOC_Os02g12790	OS02G0220400	2	6705753	6707433	895.894	23.142	-5.27474	0.0023661	1714.38	628.541	-1.4476	0.31171	253.306	76.9477	-1.71893	0.238007	567.519	174.582	-1.70077	0.228433	842.586	58.6777	-3.84394	0.0151244	1243.37	50.1221	-4.63266	0.00361607	Os02g0220400 protein; Zinc finger protein-like; cDNA clone:J013048G01, full insert sequence [Source:UniProtKB/TrEMBL;Acc:Q6YW48]
LOC_Os02g39330	OS02G0605900	2	23743045	23744109	13.2181	926.758	6.1316	0.00474804	4.68836	30.9913	2.72471	0.207639	295.361	526.204	0.833143	0.635785	94.968	527.284	2.47307	0.159476	4.16709	180.665	5.43814	0.0107087	14.2916	222.601	3.96122	0.0381211	Chitinase 6 [Source:UniProtKB/Swiss-Prot;Acc:Q6K8R2]	qAG2-1, Angaji et al., 2010
LOC_Os02g44310	OS02G0662000	2	26804988	26805820	13.2181	1155.49	6.44984	0.00106636	51.5719	34.8652	-0.5648	0.738746	1086.58	220.189	-2.30298	0.149835	123.573	910.656	2.88155	0.0711738	15.0015	634.645	5.40277	0.00339252	2.85832	168.794	5.88395	0.00276791	Os02g0662000 protein; Root-specific protein RCc3; cDNA clone:002-155-F07, full insert sequence [Source:UniProtKB/TrEMBL;Acc:Q6H6L9]	qAG2, Septiningsih et al., 2013
LOC_Os02g48570	OS02G0716800	2	29736312	29741711	1321.81	53.8187	-4.61826	0.0152574	381.32	341.872	-0.157543	0.919831	237.658	33.7386	-2.81641	0.0981903	173.917	25.9513	-2.74452	0.103473	548.389	4.63245	-6.88728	0.00114037	677.422	3.68545	-7.52207	0.000317643	Os02g0716800 protein; Peptide transporter-like [Source:UniProtKB/TrEMBL;Acc:Q6ZGW7]	qAG2, Jiang et al., 2004; qAG2, Septiningsih et al., 2013
LOC_Os03g54130	OS03G0752500	3	31023843	31024271	2003.28	60.2769	-5.05461	0.0152742	243.795	114.28	-1.09309	0.533234	7.82413	1.77572	-2.13953	0.367802	8.00935	4.71842	-0.763379	0.800797	223.356	3.0883	-6.17639	0.00718444	120.049	0	-10000000000	0.00105448
LOC_Os04g16734					327.515	47.8986	-2.77351	0.0368421	207.85	72.6358	-1.51679	0.209253	43.0327	63.3339	0.557544	0.659079	156.754	191.096	0.285794	0.808235	2488.59	115.811	-4.42548	0.000834771	22068.1	1966.56	-3.48822	0.00494535
LOC_Os04g34170	OS04G0418800	4	20708033	20709830	1866.69	13603.2	2.86539	0.020078	2133.2	4562.49	1.0968	0.329416	30485.7	49041.7	0.685875	0.541987	7979.6	14082.1	0.819479	0.449503	5399.72	28430.9	2.3965	0.0413489	2479.12	24723.5	3.31798	0.00494092	Os04g0418800 protein [Source:UniProtKB/TrEMBL;Acc:Q0JDA0]
LOC_Os04g42610	OS04G0505000	4	25207809	25213914	3546.86	179.216	-4.30677	0.00622955	1454.95	729.263	-0.996462	0.45593	214.185	32.5548	-2.71792	0.0566371	300.923	87.2909	-1.78549	0.184946	588.393	71.0308	-3.05026	0.0358849	1847.43	107.615	-4.10157	0.00509226	Os04g0505000 protein [Source:UniProtKB/TrEMBL;Acc:Q0JBX4]
LOC_Os04g48390	OS04G0573000	4	28862600	28868988	2310.23	278.781	-3.05083	0.0358206	2547.34	1133.12	-1.16869	0.362979	795.127	463.462	-0.778735	0.542468	326.095	191.096	-0.770992	0.541025	1329.3	121.988	-3.44586	0.0140118	2494.36	240.291	-3.37581	0.0129924	SPX domain-containing membrane protein Os04g0573000 [Source:UniProtKB/Swiss-Prot;Acc:Q0JAW2]
LOC_Os04g55150	OS04G0644300	4	32791897	32792697	23299.1	3887.86	-2.58323	0.0362863	23901.2	12775.2	-0.903742	0.410812	6586.94	2987.35	-1.14074	0.302972	7688.97	7402.03	-0.05487	0.959035	22006.4	4002.43	-2.45897	0.0339824	27873.4	5277.56	-2.40094	0.0328948	Os04g0644300 protein [Source:UniProtKB/TrEMBL;Acc:Q0J9L6]
LOC_Os04g55170					161.555	2.69093	-5.90777	0.0130073	1112.7	349.62	-1.67021	0.37126	133.01	9.47048	-3.81195	0.0638618	36.6142	9.43685	-1.95602	0.333861	53.3388	0	-10000000000	0.021214	334.423	5.89672	-5.82562	0.00844722
LOC_Os05g45180	OS05G0527800	5	26225665	26227661	2041.46	50.5896	-5.33462	0.0107003	162.53	75.5412	-1.10537	0.52944	13.6922	1.77572	-2.94688	0.180267	1.14419	1.17961	0.0439758	1	152.516	3.0883	-5.626	0.0129343	351.573	5.89672	-5.89777	0.00458883	Putative flavonol glucosyltransferase; cDNA clone:006-203-E09, full insert sequence [Source:UniProtKB/TrEMBL;Acc:Q65XD0]
LOC_Os06g05000	OS06G0142300	6	2205750	2206509	27.9049	3888.94	7.12271	5.95e-06	53.1347	61.014	0.199487	0.898223	412.723	1014.53	1.29756	0.291801	747.158	1764.69	1.23993	0.296475	95.8431	2158.72	4.49336	0.00115982	96.2301	8760.31	6.50835	1.08e-05	Os06g0142300 protein; Putative early nodulin [Source:UniProtKB/TrEMBL;Acc:Q9SNR1]
LOC_Os06g12460	OS06G0230100	6	6757996	6762787	1013.39	99.0264	-3.35523	0.042983	779.83	355.431	-1.13359	0.435508	414.679	139.69	-1.56977	0.286935	272.318	186.378	-0.547061	0.701111	712.573	64.8543	-3.45776	0.0298816	1797.88	63.3897	-4.82591	0.00317193
LOC_Os06g13240	OS06G0240050	6	7280549	7282975	55.8098	0	-10000000000	0.0313082	0	0	NA	NA	0	0	NA	NA	0	0	NA	NA	214.189	0	-10000000000	0.0198498	359.196	0	-10000000000	0.00561531	BURP domain-containing protein 9 [Source:UniProtKB/Swiss-Prot;Acc:Q67VD7]
LOC_Os07g23640	OS07G0418600	7	13354235	13355291	1086.82	67.2734	-4.01394	0.00424822	5075.93	2135.49	-1.2491	0.298598	3220.61	603.151	-2.41674	0.0523066	1994.33	1124.16	-0.827049	0.477416	2570.26	26.2505	-6.61343	1.15e-05	3281.35	100.981	-5.02213	0.000242344	Os07g0418600 protein; Putative uncharacterized protein OJ1123_B01.104; Putative uncharacterized protein P0025D09.120; cDNA clone:001-205-D07, full insert sequence [Source:UniProtKB/TrEMBL;Acc:Q8H5X2]	qAG7, Baltazar et al., 2014
LOC_Os07g35340	OS07G0537900	7	21146543	21149741	55.8098	575.322	3.36578	0.0272447	62.5114	430.972	2.7854	0.0512867	467.492	1917.77	2.03642	0.139143	350.123	1974.66	2.49567	0.0667176	12.5013	1312.53	6.71413	7.27e-05	135.294	1858.94	3.78031	0.00885324	Serine/threonine kinase receptor-like protein [Source:UniProtKB/TrEMBL;Acc:Q7F1L4]
LOC_Os07g38130	OS07G0568700	7	22874257	22875705	580.128	3224.82	2.47477	0.0472782	1081.45	1418.82	0.391726	0.733468	5497.43	6274.79	0.19081	0.87038	3913.14	5446.24	0.476935	0.663888	1042.61	7061.39	2.75976	0.0224551	440.181	2328.47	2.40321	0.038273	Polygalacturonase inhibitor 1 [Source:UniProtKB/Swiss-Prot;Acc:Q8GT95]	qAG7.3, Septiningsih et al., 2013
LOC_Os07g40290	OS07G0592600	7	24149718	24152074	8.81208	513.969	5.86605	0.00315178	20.3162	70.6988	1.79905	0.294238	510.524	1274.37	1.31973	0.406351	151.033	439.993	1.54261	0.319631	64.1732	762.81	3.57128	0.0377711	16.1971	364.859	4.49353	0.0110222	Probable indole-3-acetic acid-amido synthetase GH3.8 [Source:UniProtKB/Swiss-Prot;Acc:Q0D4Z6]	qAG7-2, Angaji et al., 2010; qAG7.3, Septiningsih et al., 2013
LOC_Os07g42430					176.242	0.538187	-8.35523	0.0222837	46.8836	15.4956	-1.59722	0.556255	15.6483	0.591905	-4.72449	0.172928	11.4419	0	-10000000000	0.204906	135.847	0	-10000000000	0.032441	185.791	0	-10000000000	0.0114423
LOC_Os07g48770	OS07G0687100	7	29195074	29197462	6739.77	574.784	-3.55161	0.013463	1133.02	780.592	-0.537532	0.664316	266.998	118.973	-1.1662	0.357757	183.071	287.824	0.652785	0.596282	1074.28	58.6777	-4.19441	0.00305059	3435.7	117.934	-4.86455	0.000594686	Os07g0687100 protein [Source:UniProtKB/TrEMBL;Acc:Q0D3G9]	qAG7, Jiang et al., 2004; qAG7-2, Angaji et al., 2010
LOC_Os08g32160	OS08G0417000	8	19950692	19952388	2558.44	306.228	-3.06258	0.0393971	2431.69	987.846	-1.2996	0.324131	82.1533	36.1062	-1.18607	0.384289	70.9399	161.606	1.18781	0.36709	897.592	77.2074	-3.53925	0.014334	2686.82	144.47	-4.21706	0.00345039	Os08g0417000 protein; Putative 2-oxoglutarate-dependent dioxygenase; cDNA clone:001-027-C10, full insert sequence; cDNA clone:J013158D09, full insert sequence [Source:UniProtKB/TrEMBL;Acc:Q7EYC9]
LOC_Os08g34320	OS08G0442000	8	21539571	21543115	1023.67	79.1135	-3.69368	0.0294534	978.304	720.547	-0.44119	0.760132	106.604	62.15	-0.778431	0.602871	80.0935	171.043	1.0946	0.454301	862.588	74.1191	-3.54075	0.0282483	1326.26	67.8123	-4.28967	0.00801735	Os08g0442000 protein [Source:UniProtKB/TrEMBL;Acc:Q0J5D7]
LOC_Os08g36910	OS08G0473900	8	23341289	23343299	2.93736	405.255	7.10817	0.000552965	0	10.6532	Inf	0.1196	1176.55	1788.15	0.603898	0.685673	562.943	1325.88	1.23589	0.390348	3.33367	49.4128	3.8897	0.0339122	6.66941	159.211	4.57724	0.00792795	Alpha-amylase isozyme 3D [Source:UniProtKB/Swiss-Prot;Acc:P27933]	qAG8-1, Angaji et al., 2010
LOC_Os08g43210	OS08G0545500	8	27320678	27325475	10.2808	363.814	5.14518	0.0281151	1.56279	28.0858	4.16765	0.126764	62.593	437.418	2.80494	0.163577	54.9212	198.174	1.85133	0.333804	6.66735	243.976	5.19348	0.0224568	9.52773	539.55	5.82348	0.0101582
LOC_Os10g08780	OS10G0169200	10	4757655	4758145	8.81208	647.977	6.20032	0.0050013	54.6975	94.9107	0.795096	0.666031	322.745	609.07	0.916213	0.603198	46.9119	335.008	2.83617	0.114786	26.6694	430.818	4.01382	0.0388995	13.3388	215.967	4.01711	0.0367351	Putative uncharacterized protein [Source:UniProtKB/TrEMBL;Acc:B9G7P9]
LOC_Os10g11270	OS10G0190100	10	6252107	6254450	330.453	3.76731	-6.45477	0.0173084	310.994	34.8652	-3.15703	0.163492	4.89008	1.18381	-2.04642	0.528354	6.86515	0	-10000000000	0.251148	102.51	0	-10000000000	0.0179964	488.773	0	-10000000000	0.000985358	Sulfotransferase domain containing protein, expressed [Source:UniProtKB/TrEMBL;Acc:Q33AD7]
LOC_Os10g42780	OS10G0578800	10	23075402	23079074	4826.08	270.17	-4.15891	0.00635367	987.68	1288.07	0.383099	0.772235	122.252	24.2681	-2.33272	0.0918887	133.87	179.3	0.421539	0.7461	950.93	43.2362	-4.45903	0.00281878	1978.91	218.179	-3.18112	0.0200847	LrgB-like family protein, expressed; Os10g0578800 protein; Putative uncharacterized protein OSJNBa0056G17.2; cDNA clone:J013046E02, full insert sequence [Source:UniProtKB/TrEMBL;Acc:Q7XBT7]
LOC_Os11g07922	OS11G0181700	11	4094565	4097141	1054.51	85.5717	-3.6233	0.0229651	1970.67	815.457	-1.27301	0.358135	614.194	268.133	-1.19575	0.389339	409.621	110.883	-1.88525	0.173861	695.904	30.883	-4.49401	0.00474999	1351.03	185.01	-2.86839	0.0452447	Oxidoreductase, short chain dehydrogenase/reductase family protein, expressed; cDNA clone:J013044J03, full insert sequence [Source:UniProtKB/TrEMBL;Acc:B7EBJ5]
LOC_Os11g24450	OS11G0432400	11	13941561	13945493	2255.89	294.926	-2.93527	0.0479833	1811.27	843.543	-1.10247	0.401982	341.328	57.4148	-2.57166	0.0633793	773.474	162.786	-2.24838	0.0911896	1196.79	160.591	-2.8977	0.0398207	2176.13	227.761	-3.25618	0.0187904	2-oxoglutarate/malate translocator (Clone OMT103), mitochondrial membrane-proso millet; Mitochondrial carrier protein, expressed; Os11g0432400 protein; cDNA clone:001-016-G08, full insert sequence; cDNA clone:J013132N13, full insert sequence [Source:UniProtKB/TrEMBL;Acc:Q53PA7]
LOC_Os11g26920	OS11G0457000	11	15475373	15476302	685.873	20.9893	-5.03022	0.0331072	157.841	18.4011	-3.10061	0.145058	3.91206	0.591905	-2.72449	0.439469	5.72096	9.43685	0.722048	0.81394	120.012	0	-10000000000	0.00954371	702.194	10.3193	-6.08846	0.00935428
LOC_Os11g47970	OS11G0707000	11	28932977	28936031	56132.9	3818.97	-3.87759	0.00232718	3355.3	3712.17	0.145821	0.897546	1376.07	411.966	-1.73995	0.120013	1760.91	1373.06	-0.358926	0.735508	7850.8	1009.87	-2.95867	0.0115154	36997.1	3251.3	-3.50832	0.00267621	Ribulose bisphosphate carboxylase/oxygenase activase, chloroplastic [Source:UniProtKB/Swiss-Prot;Acc:P93431]
LOC_Os12g26940	OS12G0454800	12	15776462	15779912	707.903	25.833	-4.77627	0.0297977	170.344	136.555	-0.318963	0.863598	13.6922	5.32715	-1.36192	0.531056	9.15354	18.8737	1.04398	0.631556	146.682	3.0883	-5.56973	0.0202324	953.726	35.3803	-4.75256	0.0212227	CHASE domain containing protein, expressed; Receptor-like serine/threonin kinase [Source:UniProtKB/TrEMBL;Acc:Q2QRN7]
DE genes in IR64, F291, F274-2a
LOC_Os01g38229	OS01G0563000	1	21415022	21441440	3996.28	1527.37	-1.3876	0.32155	81.2648	551.063	2.76151	0.046955	263.086	26.6357	-3.3041	0.0203138	43.4793	318.494	2.87286	0.0365761	451.713	497.216	0.138467	0.911276	1513.96	1404.89	-0.107864	0.932268	Peptidyl-prolyl cis-trans isomerase [Source:UniProtKB/TrEMBL;Acc:Q657L5]	qAG1-2, Angaji et al., 2010
LOC_Os01g65110	OS01G0871600	1	37795606	37797741	487.602	1015.02	1.05773	0.494375	156.279	1518.57	3.28052	0.0254116	151.592	20.1248	-2.91315	0.0487611	155.61	1457.99	3.22798	0.0244808	197.52	126.62	-0.641492	0.660676	1392	1303.17	-0.0951305	0.942855	OSJNBb0008G24.12 protein [Source:UniProtKB/TrEMBL;Acc:Q7F2J8]	qAG1-2, Angaji et al., 2010
DE genes in IR64, F291, 8391
LOC_Os07g34260	OS07G0526400	7	20504692	20506402	248.207	1441.26	2.53772	0.0794335	45.3208	555.906	3.6166	0.0120875	6471.53	111.87	-5.85421	0.000173221	91.5354	299.62	1.71073	0.192369	183.352	0	-10000000000	0.000110259	1110.93	185.01	-2.5861	0.0542435	Os07g0526400 protein; Putative chalcone synthase 1 [Source:UniProtKB/TrEMBL;Acc:Q6Z4M0]	qAG7.2, Septiningsih et al., 2013
DE genes in IR64, F274-2a, 8391
LOC_Os01g58890	OS01G0803200	1	34033159	34034924	1819.69	5161.75	1.50417	0.238593	242.232	1289.04	2.41184	0.0467873	1923.76	3076.13	0.67719	0.56403	740.292	3794.79	2.35785	0.0453254	461.714	3214.92	2.79971	0.0241777	1696.89	5017.37	1.56404	0.176269	Cysteine proteinase inhibitor 1 [Source:UniProtKB/Swiss-Prot;Acc:P09229]	qAG1-2, Angaji et al., 2010
LOC_Os02g36940	OS02G0579800	2	22311834	22313012	271.706	1044.08	1.94212	0.191894	50.0091	527.82	3.39978	0.0206096	1639.15	960.07	-0.77174	0.563635	157.899	1821.31	3.52791	0.0135252	85.0087	765.898	3.17147	0.0298318	396.354	1159.44	1.54857	0.247037	Os02g0579800 protein; Putative ORFX [Source:UniProtKB/TrEMBL;Acc:Q6EP48]	qAG2-1, Angaji et al., 2010
LOC_Os02g48870	OS02G0720600	2	29892488	29894313	818.054	2049.42	1.32494	0.371911	71.8881	730.232	3.34453	0.0206291	479.228	893.185	0.898247	0.505882	58.3538	1240.95	4.41047	0.0028912	143.348	1596.65	3.47745	0.0171117	416.362	894.827	1.10377	0.40117	Os02g0720600 protein; Putative 41 kD chloroplast nucleoid DNA binding protein (CND41); cDNA clone:001-205-G11, full insert sequence [Source:UniProtKB/TrEMBL;Acc:Q6Z674]	qAG2, Jiang et al., 2004; qAG2, Septiningsih et al., 2013
LOC_Os03g19990	OS03G0314500	3	11266821	11270098	1279.22	1971.92	0.624335	0.657586	9.37671	1087.6	6.85785	1.51e-05	649.402	1943.82	1.58171	0.202645	112.131	2636.42	4.55533	0.000809087	353.369	4244.87	3.58647	0.0073461	690.761	3187.18	2.20602	0.0741282	Os03g0314500 protein; WD40-like Beta Propeller Repeat family protein, expressed [Source:UniProtKB/TrEMBL;Acc:Q10MC3]
LOC_Os04g28780	OS04G0356600	4	17044349	17046921	46.9977	236.264	2.32974	0.312039	6.25114	190.79	4.93172	0.0405759	27.3844	124.892	2.18925	0.300226	3.43258	195.815	5.83405	0.0182705	1.66684	259.417	7.28202	0.00671131	32.3943	483.531	3.8998	0.0719386	Serine/threonine-protein kinase [Source:UniProtKB/TrEMBL;Acc:Q7XSF1]
LOC_Os06g19070	OS06G0294600	6	10844016	10845981	293.736	1713.05	2.54398	0.0888063	32.8185	373.832	3.50981	0.0187386	721.776	2137.96	1.56661	0.254132	216.252	1613.7	2.89959	0.037734	48.3383	594.497	3.62043	0.015436	279.163	655.273	1.23099	0.356839	Os06g0294600 protein; Putative cytochrome P450 monooxygenase [Source:UniProtKB/TrEMBL;Acc:Q5ZA77]
LOC_Os08g03310	OS08G0126700	8	1536864	1540377	527.256	466.07	-0.177957	0.879093	40.6324	772.844	4.24947	0.00703084	84.1094	313.71	1.89909	0.189787	40.0467	765.564	4.25677	0.00592386	75.8411	1527.16	4.33173	0.00618214	502.111	1941.49	1.95109	0.164743	Zinc finger CCCH domain-containing protein 54 [Source:UniProtKB/Swiss-Prot;Acc:Q6ZK57]
LOC_Os08g03350	OS08G0127100	8	1561754	1566957	1064.79	5412.55	2.34574	0.0721766	168.781	1715.17	3.34513	0.00901458	1165.79	2909.81	1.31961	0.273218	227.694	3374.85	3.88965	0.00246029	220.856	2177.25	3.30133	0.0106815	973.734	3403.14	1.80527	0.129185	Os08g0127100 protein; Putative histidine amino acid transporter; cDNA clone:J013002G10, full insert sequence; cDNA clone:J033080E11, full insert sequence [Source:UniProtKB/TrEMBL;Acc:Q6ZK52]
LOC_Os08g13440	OS08G0231400	8	7994404	7995717	5902.62	1831.99	-1.68795	0.214285	10.9395	369.958	5.07974	0.000861695	21.5163	3.55143	-2.59896	0.0901495	67.5073	2379.27	5.13933	0.000350266	65.0066	3.0883	-4.3957	0.0106901	2312.38	1586.95	-0.543118	0.656382	Germin-like protein 8-12 [Source:UniProtKB/Swiss-Prot;Acc:Q6ZCR3]
LOC_Os10g02070	OS10G0109600	10	677177	678880	8.81208	122.707	3.79959	0.20754	0	87.1629	Inf	0.0428103	7.82413	126.076	4.01022	0.15145	1.14419	161.606	7.14201	0.0325421	0	58.6777	Inf	0.0365412	3.81109	72.9719	4.25906	0.135755	Class III peroxidase 126; Os10g0109600 protein; Peroxidase N, putative, expressed; Putative peroxidase; cDNA clone:006-210-B12, full insert sequence; cDNA clone:J013021P04, full insert sequence [Source:UniProtKB/TrEMBL;Acc:Q7XHB1]
LOC_Os12g10740	OS12G0210400	12	5766036	5773224	2445.35	2396.55	-0.0290845	0.955336	157.841	1013.03	2.68213	0.0342467	800.017	900.288	0.170356	0.892312	177.35	3204.99	4.17565	0.0015096	295.03	2367.18	3.00424	0.0201169	2190.43	4638.51	1.08245	0.359796	Leucine Rich Repeat family protein, expressed; Os12g0210400 protein; cDNA clone:J013159D03, full insert sequence [Source:UniProtKB/TrEMBL;Acc:Q2QW32]
DE genes in IR64, F274-2a, 8753
LOC_Os02g30910	OS02G0513100	2	18454408	18457136	16.1555	39.2877	1.28205	0.680038	487.589	7.74781	-5.97573	0.0336808	40.0986	0.591905	-6.08204	0.0571337	155.61	0	-10000000000	0.0131668	15.8349	0	-10000000000	0.18218	63.8358	0	-10000000000	0.0208155	Bidirectional sugar transporter SWEET15 [Source:UniProtKB/Swiss-Prot;Acc:Q6K602]	qAG2.2, Baltazar et al., 2014
LOC_Os02g37190	OS02G0582900	2	22477790	22478946	7.3434	151.769	4.36928	0.14207	1.56279	217.907	7.12345	0.0314838	0	15.9814	Inf	0.123942	0	64.8783	Inf	0.0359056	0	6.1766	Inf	0.281633	1.90555	253.559	7.05597	0.0237558	Os02g0582900 protein; Putative uncharacterized protein OSJNBa0016D04.20 [Source:UniProtKB/TrEMBL;Acc:Q6EPT1]	qAG2-1, Angaji et al., 2010
LOC_Os03g06705	OS03G0162800	3	3405791	3407198	105.745	305.69	1.53148	0.378394	34.3813	620.794	4.17442	0.0152982	137.9	565.861	2.03682	0.197975	51.4887	1459.17	4.82475	0.00515781	95.0097	582.144	2.61523	0.108296	9.52773	626.526	6.0391	0.00116725	Os03g0162800 protein [Source:UniProtKB/TrEMBL;Acc:Q0DUX1]
LOC_Os07g48390	OS07G0682000	7	28919586	28920774	741.683	535.496	-0.469927	0.735096	217.227	1745.2	3.00611	0.0460704	276.778	214.27	-0.369304	0.793391	26.3164	658.22	4.64454	0.00384387	125.846	571.335	2.18268	0.143683	84.7968	1279.59	3.91553	0.0112053	Os07g0682000 protein; Putative uncharacterized protein OSJNBa0008J01.29; cDNA clone:002-168-D09, full insert sequence [Source:UniProtKB/TrEMBL;Acc:Q7XHV8]	qAG7, Jiang et al., 2004; qAG7-2, Angaji et al., 2010
DE genes in IR64, 8391, 8753
LOC_Os01g03890	OS01G0129600	1	1657306	1658388	16.1555	140.467	3.12013	0.217295	0	98.7846	Inf	0.0191272	7.82413	170.469	4.44543	0.0704351	3.43258	82.5724	4.5883	0.0716996	5.83393	504.937	6.43549	0.0151444	0.952773	201.963	7.72774	0.00939744	DUF260 domain containing protein, putative, expressed
LOC_Os01g57968					16626.9	7280.06	-1.1915	0.398858	83260.5	9679.93	-3.10456	0.0283026	11709.8	17213.2	0.5558	0.680494	31489.3	13215.1	-1.25267	0.336389	261809	8421.79	-4.95825	0.00123871	294272	32873.5	-3.16215	0.0236972
LOC_Os01g60770	OS01G0823100	1	35145517	35147323	3344.18	4479.33	0.421629	0.746212	1047.07	5600.7	2.41925	0.0350673	1468	2659.43	0.857263	0.442234	868.442	572.109	-0.602139	0.576317	1596.83	27867.3	4.12529	0.000875528	968.97	7463.77	2.94538	0.0105864	Expansin-A2 [Source:UniProtKB/Swiss-Prot;Acc:Q40636]	qAG1-2, Angaji et al., 2010
LOC_Os10g21190					4052.09	1948.78	-1.0561	0.368873	23654.3	2538.38	-3.22013	0.00657647	3027.94	4061.65	0.423732	0.705786	8735.91	3703.96	-1.23789	0.253973	48584.1	2317.77	-4.38968	0.000443588	54585.3	7210.95	-2.92025	0.0113629
DE genes in F291, F274-2a, 8391
LOC_Os01g11650	OS01G0214800	1	6278520	6283559	1583.24	1358.92	-0.220414	0.842154	450.082	1167.01	1.37456	0.271097	252.328	1450.76	2.52344	0.049676	124.717	1692.73	3.76263	0.00450312	354.203	4232.51	3.57887	0.00801204	1232.89	2908.56	1.23826	0.307757	Putative esterase [Source:UniProtKB/TrEMBL;Acc:Q5QN43]
LOC_Os02g17534	OS02G0275200	2	10088213	10094968	182.116	613.533	1.75228	0.34893	15.6279	177.231	3.50344	0.0602023	32.2745	474.708	3.87857	0.0342383	22.8838	677.094	4.88695	0.00951873	32.5033	582.144	4.16272	0.0259061	66.6941	442.254	2.72924	0.1123	Os02g0275200 protein; Putative galactoside 2-alpha-L-fucosyltransferase; cDNA clone:J023106B19, full insert sequence [Source:UniProtKB/TrEMBL;Acc:Q6K7S6]
LOC_Os03g63970	OS03G0856700	3	36150664	36152159	207.084	751.309	1.85919	0.223871	54.6975	271.174	2.30967	0.112685	91.9335	2114.88	4.52384	0.00354448	91.5354	1993.53	4.44486	0.00353922	69.1737	625.38	3.17644	0.0337197	265.824	1180.82	2.15124	0.122472	Gibberellin 20 oxidase 1 [Source:UniProtKB/Swiss-Prot;Acc:P93771]
LOC_Os05g11130	OS05G0200400	5	6269370	6273074	421.511	350.36	-0.266733	0.861076	12.5023	127.839	3.35406	0.097524	1.95603	98.8482	5.65921	0.0152186	8.00935	238.28	4.89483	0.0189638	33.3367	798.325	4.58179	0.0251991	63.8358	296.31	2.21467	0.226006	Os05g0200400 protein [Source:UniProtKB/TrEMBL;Acc:C7J2P9]	qAG5, Jiang et al., 2006
LOC_Os05g25450	OS05G0318700	5	14795539	14799642	616.845	764.226	0.30909	0.868652	85.9532	332.188	1.95037	0.180774	183.867	2113.1	3.52263	0.0199112	73.2283	703.045	3.26314	0.0272207	65.84	826.12	3.64931	0.0182834	463.048	782.052	0.756104	0.58226	Os05g0318700 protein [Source:UniProtKB/TrEMBL;Acc:Q0DJ75]	qAG5, Jiang et al., 2004
LOC_Os05g43760	OS05G0513100	5	25436359	25438597	1442.24	249.181	-2.53305	0.0722114	2326.99	1732.61	-0.425521	0.731589	1880.72	104.175	-4.1742	0.00294922	2431.41	115.601	-4.39456	0.00163374	2019.37	152.871	-3.72352	0.00739949	1132.85	276.409	-2.03508	0.109688	Os05g0513100 protein; Putative TCP transcription factor; TCP transcription factor; cDNA clone:J023038I07, full insert sequence [Source:UniProtKB/TrEMBL;Acc:Q5TKH1]
LOC_Os06g03080	OS06G0121500	6	1137134	1138629	295.205	46.8223	-2.65645	0.163573	393.822	369.958	-0.0901815	0.955424	834.247	8.28667	-6.65354	0.00154026	359.276	8.25724	-5.44329	0.00686927	656.734	9.26489	-6.14739	0.00362127	49.5442	30.2207	-0.71318	0.684604	Os06g0121500 protein [Source:UniProtKB/TrEMBL;Acc:Q0DF21]
LOC_Os06g49200	OS06G0705500	6	29808539	29811842	386.263	227.115	-0.76616	0.620622	620.426	260.52	-1.25186	0.410408	841.094	20.1248	-5.38522	0.00240112	1264.33	73.1356	-4.11166	0.0125338	727.574	54.0452	-3.75086	0.0253919	323.943	79.6057	-2.0248	0.185654	Os06g0705500 protein; Putative uncharacterized protein P0018H04.14; Putative uncharacterized protein P0621D05.2; cDNA clone:006-309-H01, full insert sequence [Source:UniProtKB/TrEMBL;Acc:Q5Z8U9]
LOC_Os07g03180	OS07G0123900	7	1245458	1246177	293.736	499.976	0.767339	0.653214	64.0742	270.205	2.07624	0.173041	107.582	1582.16	3.87839	0.0150034	73.2283	882.345	3.59087	0.0207281	102.51	1022.23	3.31787	0.0359013	235.335	671.489	1.51265	0.295745	Os07g0123900 protein; cDNA clone:J033031F04, full insert sequence [Source:UniProtKB/TrEMBL;Acc:Q0D8V8]
LOC_Os08g04250	OS08G0136800	8	2066433	2067718	2.93736	30.6767	3.38455	0.123205	0	2.90543	Inf	0.593474	2.93405	3231.8	10.1052	6.6e-06	2.28838	38.927	4.08837	0.0410106	4.16709	1067.01	8.00031	0.00011779	6.66941	42.0141	2.65524	0.126865	33kDa secretory protein; Os08g0136800 protein; Putative 33 kDa secretory protein; cDNA clone:001-113-F10, full insert sequence [Source:UniProtKB/TrEMBL;Acc:Q6ZJX3]
LOC_Os09g31478	OS09G0491740	9	18978153	18983471	164.492	589.853	1.84234	0.282582	70.3254	250.835	1.83462	0.249795	62.593	862.406	3.78429	0.0240146	41.1909	902.399	4.45337	0.00883345	49.1717	554.349	3.4949	0.0377595	109.569	945.686	3.10952	0.0526623	Os09g0491740 protein; cDNA clone:J033028L15, full insert sequence [Source:UniProtKB/TrEMBL;Acc:B7EM10]
LOC_Os10g31330	OS10G0450900	10	16428860	16429924	788.681	2815.79	1.83603	0.194911	87.516	130.744	0.57913	0.670823	139.856	2509.68	4.16549	0.00357025	64.0748	1027.44	4.00315	0.00438917	120.846	3065.14	4.66471	0.00156571	172.452	996.545	2.53074	0.0557289	Glycine-rich cell wall structural protein 2 [Source:UniProtKB/Swiss-Prot;Acc:A3C5A7]
LOC_Os11g01140	OS11G0102200	11	79395	94104	2470.32	1334.7	-0.888177	0.480612	498.529	1955.35	1.97168	0.110983	139.856	1140.6	3.02778	0.0183616	124.717	2097.34	4.07183	0.00197115	730.074	5603.72	2.94027	0.0227879	1381.52	2584.97	0.903892	0.444746	Phototropin-1B [Source:UniProtKB/Swiss-Prot;Acc:Q2RBR1]
LOC_Os11g36190	OS11G0569800	11	21284892	21289519	992.827	678.654	-0.548867	0.679367	9.37671	43.5815	2.21656	0.161772	205.383	1527.71	2.89498	0.0391191	3.43258	36.5678	3.41321	0.0420825	410.875	3156.24	2.94143	0.038495	533.553	2063.11	1.95112	0.143465	Receptor kinase, putative, expressed [Source:UniProtKB/TrEMBL;Acc:Q2R2D4]	qAG11, Jiang et al., 2006
LOC_Os11g42960	OS11G0649600	11	25893929	25895032	646.219	1938.55	1.58488	0.256129	159.404	708.925	2.15294	0.1011	139.856	1223.47	3.12896	0.0205861	49.2003	1788.28	5.18377	0.000376805	182.519	4708.11	4.68903	0.00122347	295.36	1674.67	2.50333	0.0535255	CASP-like protein Os11g0649600 [Source:UniProtKB/Swiss-Prot;Acc:Q2R0D2]	qAG11, Jiang et al., 2006; qAG11, Baltazar et al., 2014
LOC_Os12g01140	OS12G0101800	12	75290	89955	2258.83	1619.94	-0.479632	0.695848	234.418	1098.25	2.22806	0.0818628	94.8675	926.332	3.28754	0.0134621	165.908	1473.33	3.15062	0.0148922	348.369	4221.7	3.59914	0.00793734	1388.19	2472.2	0.832589	0.49161	Nonphototropic hypocotyl protein 1, putative, expressed; cDNA clone:J013081N02, full insert sequence [Source:UniProtKB/TrEMBL;Acc:B7ECP0]
LOC_Os12g27370	OS12G0459300	12	16092309	16102733	2401.29	325.603	-2.88262	0.0685445	53.1347	125.902	1.24457	0.400105	725.688	66.2934	-3.45241	0.0232277	907.344	122.679	-2.88676	0.0473681	1890.19	140.518	-3.74971	0.0155082	55.2608	61.1784	0.146766	0.928772	Os12g0459300 protein [Source:UniProtKB/TrEMBL;Acc:C7JAC1]
DE genes in F291, F274-2a, 8753
LOC_Os01g37460	OS01G0555100	1	20935789	20937436	127.775	23.142	-2.46502	0.309473	95.3299	10.6532	-3.16164	0.182355	183.867	0.591905	-8.27908	0.00673273	351.267	1.17961	-8.21812	0.00642957	80.0082	6.1766	-3.69526	0.148573	316.321	1.47418	-7.74533	0.00680761	Os01g0555100 protein; Putative zinc finger transcription factor ZFP30; cDNA clone:002-180-E06, full insert sequence [Source:UniProtKB/TrEMBL;Acc:Q8RYZ5]	qAG1-2, Angaji et al., 2010
LOC_Os04g28520	OS04G0353600	4	16882610	16890074	8179.07	2935.27	-1.47844	0.247361	2036.31	2281.73	0.164172	0.893666	117.362	13.6138	-3.10782	0.0178745	136.159	1632.57	3.58379	0.00470329	8.33418	7.72074	-0.110301	1	5378.4	567.559	-3.24434	0.00946265	OSJNBb0002N06.4 protein [Source:UniProtKB/TrEMBL;Acc:Q7XS02]
LOC_Os04g33190	OS04G0404800	4	20077907	20082924	4360.51	4496.01	0.0441501	0.997541	537.598	1500.17	1.48053	0.198755	455.755	4708.01	3.36879	0.00570995	331.816	7880.95	4.56992	0.000297247	565.058	2728.51	2.27164	0.0562796	1605.42	9748.75	2.60226	0.025487	Putative uncharacterized protein [Source:UniProtKB/TrEMBL;Acc:B9FF02]
LOC_Os04g46830	OS04G0554800	4	27753369	27754530	4451.57	5175.74	0.217453	0.878747	1905.04	3927.17	1.04367	0.344462	2531.1	17194.3	2.76409	0.0164108	1688.83	11280.6	2.73975	0.0149971	2878.63	8651.87	1.58763	0.159029	1994.15	10300.8	2.36891	0.0340372	OSJNBa0010H02.24 protein; Os04g0554800 protein; cDNA, clone: J075130A11, full insert sequence [Source:UniProtKB/TrEMBL;Acc:Q7XT29]
LOC_Os05g02530	OS05G0116100	5	877099	880445	3761.29	2108.08	-0.835298	0.473484	5837	1969.88	-1.56712	0.164998	5726.28	688.386	-3.05631	0.0100243	6484.14	1278.69	-2.34224	0.0379052	5121.36	1221.42	-2.06796	0.075107	13870.5	1832.41	-2.92021	0.011838	Dehydroascorbate reductase; Os05g0116100 protein; cDNA clone:001-040-D08, full insert sequence; cDNA clone:J023074C02, full insert sequence [Source:UniProtKB/TrEMBL;Acc:Q65XA0]
LOC_Os06g04950	OS06G0141700	6	2180250	2181114	22.0302	434.317	4.30119	0.0582337	14.0651	0.968477	-3.86026	0.179651	13.6922	449.848	5.03801	0.0238217	10.2977	201.713	4.2919	0.046876	27.5028	223.902	3.02521	0.146938	12.3861	478.371	5.27134	0.0178864	Os06g0141700 protein; Putative early nodulin; cDNA clone:J033095D10, full insert sequence [Source:UniProtKB/TrEMBL;Acc:Q9SNR6]
LOC_Os10g21790	OS10G0361900	10	11185582	11186269	0	5.38187	Inf	0.417653	0	30.0228	Inf	0.063819	3.91206	317.261	6.3416	0.0125947	1.14419	176.941	7.27279	0.00962894	0	1.54415	Inf	0.799628	5.71664	978.855	7.41978	0.00402158	Os10g0361900 protein; Putative elicitor inducible protein; TMV-induced protein I, putative, expressed [Source:UniProtKB/TrEMBL;Acc:Q8S6P7]
LOC_Os10g37340	OS10G0517500	10	20001168	20004598	1794.73	839.034	-1.09696	0.397813	1601.86	717.641	-1.15841	0.346112	4899.86	746.392	-2.71473	0.034866	3776.98	193.455	-4.28716	0.00146672	978.433	546.629	-0.839912	0.507799	1143.33	140.047	-3.02926	0.0183247	Cys/Met metabolism PLP-dependent enzyme family protein, expressed; Os10g0517500 protein; Putative gamma-lyase; cDNA clone:J023092C09, full insert sequence [Source:UniProtKB/TrEMBL;Acc:Q7XCS3]
LOC_Os11g15040	OS11G0256900	11	8466832	8469347	414.168	346.054	-0.259216	0.857349	70.3254	436.783	2.6348	0.136083	10.7582	167.509	3.96073	0.0369712	10.2977	620.473	5.91297	0.00328615	50.8385	250.152	2.29881	0.195063	45.7331	780.578	4.09323	0.0253511	Os11g0256900 protein [Source:UniProtKB/TrEMBL;Acc:C7J9B3]
DE genes in F291, 8391, 8753
LOC_Os01g03310	OS01G0123900	1	1338241	1339098	367.17	36.5967	-3.32666	0.103955	7.81393	2.90543	-1.4273	0.61837	678.743	6.51096	-6.70385	0.00253917	273.462	22.4125	-3.60896	0.0610876	180.018	0	-10000000000	0.00266542	925.143	2.94836	-8.29362	0.000506993	Os01g0123900 protein; cDNA clone:001-025-D04, full insert sequence; cDNA clone:006-203-G05, full insert sequence; cDNA clone:J023053A08, full insert sequence [Source:UniProtKB/TrEMBL;Acc:Q0JR29]
LOC_Os01g28500	OS01G0382400	1	15958748	15959497	355.42	61.3533	-2.53431	0.238763	254.734	18.4011	-3.79113	0.0749781	290.471	2.36762	-6.93881	0.00493693	50.3445	16.5145	-1.6081	0.427259	133.347	1.54415	-6.43223	0.017414	670.752	16.9531	-5.30616	0.0166655	Os01g0382400 protein; Putative pathogenesis-related protein; cDNA clone:J023072K01, full insert sequence [Source:UniProtKB/TrEMBL;Acc:Q8W084]
LOC_Os01g64660	OS01G0866400	1	37519585	37522414	8422.88	1845.98	-2.18992	0.0936169	1293.99	2330.16	0.848604	0.475989	519.326	70.4367	-2.88224	0.0220769	779.195	639.347	-0.285386	0.804513	1851.02	211.548	-3.12926	0.0142194	5317.43	709.817	-2.90521	0.018125	Fructose-1,6-bisphosphatase, cytosolic [Source:UniProtKB/Swiss-Prot;Acc:Q0JHF8]	qAG1-2, Angaji et al., 2010
LOC_Os01g73250	OS01G0963600	1	42460555	42461946	2169.24	3477.76	0.680971	0.624232	4800.88	1075.98	-2.15765	0.0840661	1885.61	35.5143	-5.73049	7.8e-05	1351.29	329.11	-2.0377	0.0943604	1860.19	12.3532	-7.23442	5.39e-06	1814.08	13.2676	-7.09519	4.02e-06	Os01g0963600 protein; Putative bundle sheath cell specific protein 1; Uncharacterized protein; cDNA clone:001-033-F08, full insert sequence; cDNA clone:006-309-D08, full insert sequence; cDNA clone:J013041E22, full insert sequence [Source:UniProtKB/TrEMBL;Acc:Q94DL7]
LOC_Os02g02780	OS02G0120100	2	1050786	1056830	19.0928	175.449	3.19995	0.0844181	146.902	80.3836	-0.86988	0.590764	133.01	1488.64	3.48439	0.0414107	30.8932	182.839	2.56521	0.120023	7.50076	1306.35	7.44429	0.00029599	14.2916	403.188	4.81821	0.00797039	Os02g0120100 protein; Putative serine/threonine protein kinase; cDNA clone:J033136N12, full insert sequence [Source:UniProtKB/TrEMBL;Acc:Q6YUS6]
LOC_Os02g14430	OS02G0240100	2	7938411	7939811	13.2181	174.373	3.72159	0.114799	6.25114	9.68477	0.631598	0.867829	26.4064	687.202	4.70177	0.0363906	9.15354	40.1066	2.13144	0.322863	5.83393	680.97	6.86698	0.00603981	0	22.8498	Inf	0.0424131	Class III peroxidase 30; Os02g0240100 protein; Putative bacterial-induced peroxidase; cDNA clone:002-137-C10, full insert sequence [Source:UniProtKB/TrEMBL;Acc:Q6ER51]
LOC_Os02g36590	OS02G0575700	2	22096140	22100732	3068.07	590.391	-2.37759	0.113642	1622.17	826.111	-0.973519	0.47134	278.734	27.2276	-3.35575	0.0229326	175.061	257.154	0.554772	0.677951	565.891	40.1479	-3.81713	0.0120573	964.207	60.4414	-3.99573	0.00691344	Loricrin-like protein; Os02g0575700 protein; cDNA clone:001-202-D10, full insert sequence [Source:UniProtKB/TrEMBL;Acc:Q69JW8]	qAG2-1, Angaji et al., 2010
LOC_Os02g37654	OS02G0589000	2	22722799	22733189	1790.32	129.703	-3.78693	0.0532832	132.837	186.916	0.492736	0.781786	38.1426	0.591905	-6.00989	0.0130674	52.6328	15.3349	-1.77915	0.324057	60.8395	0	-10000000000	0.0112522	587.861	40.5399	-3.85806	0.0356799	Os02g0589000 protein; Putative acyltransferase (46.9 kD) (1H765) [Source:UniProtKB/TrEMBL;Acc:Q6YY42]	qAG2-1, Angaji et al., 2010
LOC_Os03g03724	OS03G0129400	3	1667248	1667899	201.209	23.142	-3.12011	0.06953	48.4464	198.538	2.03495	0.195702	18.5823	185.266	3.3176	0.0432831	10.2977	34.2086	1.73203	0.298218	104.177	3531.47	5.08316	0.00334612	740.305	59.7043	-3.63221	0.0232653	Os03g0129400 protein [Source:UniProtKB/TrEMBL;Acc:Q0DVH6]
LOC_Os03g47270	OS03G0676300	3	26746815	26747658	186.522	480.063	1.36388	0.353606	200.037	351.557	0.813495	0.544003	236.68	2001.82	3.08031	0.0272887	157.899	974.355	2.62545	0.0510785	182.519	4558.33	4.64239	0.00196851	120.049	986.226	3.03829	0.0271925	Expressed protein; Os03g0676300 protein; cDNA clone:002-139-B03, full insert sequence [Source:UniProtKB/TrEMBL;Acc:Q9FRF5]
LOC_Os03g53300	OS03G0744700	3	30593512	30596056	596.284	73.1934	-3.02621	0.114522	511.031	130.744	-1.96666	0.257466	201.471	1.18381	-7.41099	0.00129165	302.067	25.9513	-3.54099	0.0518497	456.713	6.1766	-6.20833	0.00390509	752.691	11.0563	-6.08911	0.00274633	Expressed protein; Os03g0744700 protein; Putative uncharacterized protein OSJNBb0036F07.14; cDNA clone:J023083K21, full insert sequence [Source:UniProtKB/TrEMBL;Acc:Q84MP5]	qAG3-1, Angaji et al., 2010
LOC_Os03g57220	OS03G0786100	3	32628790	32632431	11777.3	2302.9	-2.35449	0.0600003	2247.29	1693.87	-0.407864	0.713673	1583.41	304.831	-2.37695	0.0427333	2139.64	1330.6	-0.685295	0.531123	3881.23	738.103	-2.39462	0.0432937	12562.3	1655.5	-2.92376	0.0126644	Peroxisomal (S)-2-hydroxy-acid oxidase GLO1 [Source:UniProtKB/Swiss-Prot;Acc:Q10CE4]
LOC_Os03g58940	OS03G0804200	3	33563702	33566613	4407.51	3581.63	-0.299345	0.789745	3535.02	2721.42	-0.377359	0.745896	702.215	125.484	-2.48441	0.0452854	870.73	1882.65	1.11247	0.336834	2738.61	152.871	-4.16306	0.00174596	2480.07	271.986	-3.18878	0.0106139	Protease inhibitor/seed storage/LTP family protein; Putative protease inhibitor; cDNA, clone: J065097G18, full insert sequence [Source:UniProtKB/TrEMBL;Acc:Q75HK2]
LOC_Os04g01710	OS04G0107700	4	471138	472885	368.638	58.6624	-2.6517	0.11318	734.509	2035.74	1.4707	0.32929	192.669	2.95953	-6.02462	0.0012943	226.55	412.862	0.86583	0.551621	496.717	10.809	-5.52211	0.00244483	665.036	34.6432	-4.26279	0.00949798	OSJNBb0085F13.15 protein; Os04g0107700 protein; cDNA clone:002-174-C02, full insert sequence [Source:UniProtKB/TrEMBL;Acc:Q7XRA0]
LOC_Os04g38220	OS04G0454200	4	22744192	22748050	3743.66	477.372	-2.97127	0.0578245	415.701	360.273	-0.206454	0.880231	111.494	7.69477	-3.85694	0.0148364	86.9586	172.222	0.985873	0.475973	427.544	54.0452	-2.98383	0.0482556	1386.29	116.46	-3.57332	0.0159939	OSJNBa0006M15.8 protein; OSJNBa0027G07.27 protein; Os04g0454200 protein; cDNA clone:J013111I22, full insert sequence [Source:UniProtKB/TrEMBL;Acc:Q7X632]
LOC_Os04g46130	OS04G0545600	4	27333724	27335203	2297.01	600.078	-1.93654	0.178505	2017.56	353.494	-2.51285	0.0665509	852.83	46.7605	-4.1889	0.00436566	290.625	397.527	0.451896	0.725765	1356.81	162.136	-3.06494	0.0305611	1645.44	254.296	-2.69389	0.046991	Os04g0545600 protein; cDNA clone:001-125-H05, full insert sequence [Source:UniProtKB/TrEMBL;Acc:Q0JBA5]
LOC_Os04g46630	OS04G0552000	4	27645701	27647185	351.014	48.975	-2.84141	0.136682	834.527	551.063	-0.598742	0.719637	110.516	5.32715	-4.37475	0.0254522	105.266	29.4902	-1.83573	0.289744	252.526	18.5298	-3.76851	0.0492781	777.463	12.5305	-5.95526	0.00310978	Expansin-B15 [Source:UniProtKB/Swiss-Prot;Acc:Q7XT40]
LOC_Os05g09740	OS05G0190300	5	5534529	5536108	9044.13	1912.72	-2.24136	0.0725383	3656.92	2437.66	-0.585134	0.60012	8695.54	62.7419	-7.1147	6.05e-07	3132.8	1728.12	-0.858246	0.43369	5633.07	92.6489	-5.926	1.4e-05	5008.73	610.31	-3.03683	0.0100217	Os05g0190300 protein; Putative acid phosphatase; cDNA clone:001-034-H04, full insert sequence; cDNA clone:001-039-H02, full insert sequence; cDNA clone:001-207-D12, full insert sequence; cDNA clone:006-301-H06, full insert sequence; cDNA clone:006-309-A07, full insert sequence; cDNA clone:006-309-F05, full insert sequence; cDNA clone:006-310-H12, full insert sequence [Source:UniProtKB/TrEMBL;Acc:…	qAG5, Jiang et al., 2006
LOC_Os05g10210	OS05G0190500	5	5553632	5554934	15360.9	5529.87	-1.47395	0.212932	9150.11	4626.41	-0.983895	0.368585	9648.13	208.943	-5.52907	1.95e-05	4020.69	4947.27	0.299188	0.777678	7964.98	210.004	-5.24518	4.46e-05	9914.56	943.475	-3.39349	0.00354531	Os05g0190500 protein; Putative acid phosphatase; cDNA clone:006-202-C05, full insert sequence; cDNA clone:006-202-C11, full insert sequence; cDNA clone:006-301-B10, full insert sequence; cDNA clone:006-303-D05, full insert sequence; cDNA clone:006-308-E04, full insert sequence [Source:UniProtKB/TrEMBL;Acc:Q60DT7]	qAG5, Jiang et al., 2006
LOC_Os05g43940	OS05G0515600	5	25569090	25570887	67.5592	61.3533	-0.139012	0.92835	62.5114	18.4011	-1.76433	0.442361	158.439	2.36762	-6.06434	0.0232351	59.498	15.3349	-1.95602	0.386938	320.866	1.54415	-7.69902	0.0113748	411.598	5.15963	-6.31783	0.0158036	Os05g0515600 protein; Putative o-methyltransferase ZRP4 [Source:UniProtKB/TrEMBL;Acc:Q75IK0]
LOC_Os05g49370	OS05G0568800	5	28310925	28311933	2076.71	607.613	-1.77308	0.236463	1079.88	539.442	-1.00134	0.467105	125.186	5.91905	-4.40256	0.00636005	106.41	711.302	2.74083	0.0538339	705.905	44.7803	-3.97854	0.0102797	1572.08	92.1362	-4.09276	0.00659646	Os05g0568800 protein; Putative uncharacterized protein OJ1781_H11.22; Putative uncharacterized protein OSJNBa0040E06.4 [Source:UniProtKB/TrEMBL;Acc:Q6AUN6]
LOC_Os06g01934	OS06G0108900	6	523053	530057	2780.21	995.646	-1.48149	0.31675	878.285	650.816	-0.432439	0.750513	66.5051	4.14334	-4.0046	0.0140648	73.2283	385.731	2.39712	0.0894841	440.045	32.4271	-3.76238	0.0152661	1232.89	109.089	-3.49846	0.0172608	Os06g0108900 protein [Source:UniProtKB/TrEMBL;Acc:Q0DF87]
LOC_Os06g02780	OS06G0118700	6	1011587	1014688	3266.34	2698.47	-0.275535	0.811236	1644.05	610.14	-1.43004	0.254884	485.096	54.4553	-3.15513	0.0183845	192.224	330.29	0.780941	0.523504	2882.79	310.374	-3.21539	0.0166896	2579.16	316.949	-3.02458	0.0199715	Os06g0118700 protein; Putative nucleoid DNA-binding protein cnd41; cDNA clone:J023003I22, full insert sequence [Source:UniProtKB/TrEMBL;Acc:Q5VPR6]
LOC_Os06g21110	OS06G0316000	6	12194751	12195839	1257.19	586.086	-1.10102	0.510229	382.882	346.715	-0.143153	0.926787	88.0214	4.14334	-4.40899	0.0192476	107.554	188.737	0.811315	0.607942	285.862	10.809	-4.72501	0.0131853	575.475	9.58217	-5.90826	0.00205898	Os06g0316000 protein; Putative uncharacterized protein B1156C07.27; cDNA clone:001-014-D05, full insert sequence [Source:UniProtKB/TrEMBL;Acc:Q5Z4Q8]
LOC_Os07g34320	OS07G0527000	7	20562555	20567659	497.882	266.941	-0.899285	0.651951	57.8231	43.5815	-0.407931	0.847737	108.56	4.73524	-4.51891	0.0467061	73.2283	117.961	0.687832	0.72536	93.3429	1.54415	-5.91766	0.030917	473.528	6.63381	-6.15747	0.00918848	Putative uncharacterized protein [Source:UniProtKB/TrEMBL;Acc:A3BKI4]	qAG7.2, Septiningsih et al., 2013
LOC_Os08g09010	OS08G0189600	8	5242497	5243656	104.276	106.023	0.0239648	1	7.81393	35.8336	2.19719	0.242534	1.95603	58.0067	4.89022	0.0173872	5.72096	56.6211	3.30701	0.0687406	5.83393	3106.83	9.05676	2.89e-05	16.1971	632.423	5.28708	0.00385025	Germin-like protein 8-7 [Source:UniProtKB/Swiss-Prot;Acc:Q6YZZ2]
LOC_Os08g19694	OS08G0293300	8	11785529	11798215	0	13.4547	Inf	0.157033	34.3813	95.8792	1.47959	0.464289	29.3405	667.077	4.50689	0.0358167	5.72096	46.0046	3.00745	0.16373	14.1681	407.655	4.84663	0.0284819	24.7721	609.573	4.62101	0.0302284	Os08g0293300 protein; Putative disease resistance gene homolog 9N [Source:UniProtKB/TrEMBL;Acc:Q84YX3]
LOC_Os08g35190	OS08G0453200	8	22190140	22191722	2129.58	1455.8	-0.548764	0.656764	1525.28	753.475	-1.01744	0.407012	4999.62	452.807	-3.46485	0.00891428	2568.71	953.122	-1.43031	0.235674	1365.97	132.797	-3.36264	0.0119531	779.369	117.197	-2.73337	0.0317063
LOC_Os09g13650	OS09G0307300	9	7964048	7967912	5052.26	1139.88	-2.14805	0.125188	1748.76	1492.42	-0.228674	0.853367	269.932	8.87858	-4.92613	0.00102337	146.457	270.13	0.88318	0.481901	815.083	26.2505	-4.95653	0.00095754	2007.49	61.9155	-5.01895	0.000551864	Os09g0307300 protein; cDNA clone:J013060B12, full insert sequence [Source:UniProtKB/TrEMBL;Acc:Q0J2S5]
LOC_Os09g26840	OS09G0439800	9	16307780	16310837	13.2181	231.42	4.12993	0.057218	26.5674	26.1489	-0.0229058	1	27.3844	601.376	4.45684	0.0292277	37.7583	270.13	2.83879	0.132504	25.0025	545.085	4.44633	0.031208	8.57496	543.235	5.9853	0.00610126	Os09g0439800 protein; Putative uncharacterized protein OJ1344_B01.21 [Source:UniProtKB/TrEMBL;Acc:Q69P88]
LOC_Os09g31025	OS09G0483300	9	18667422	18668125	1.46868	57.0478	5.27958	0.129203	0	0.968477	Inf	1	0	360.47	Inf	0.00653853	0	33.029	Inf	0.0705158	0.833418	132.797	7.31596	0.030219	0	111.301	Inf	0.0188124	EF hand family protein, expressed
LOC_Os11g04860	OS11G0145200	11	2067852	2069428	32.3109	116.248	1.84712	0.428495	7.81393	37.7706	2.27314	0.324361	2.93405	97.0724	5.0481	0.0382677	13.7303	166.324	3.59856	0.0942986	2.50025	429.273	7.42368	0.00448966	31.4415	748.146	4.57258	0.037669	Indole-3-acetate beta-glucosyltransferase, putative, expressed; Os11g0145200 protein; cDNA clone:002-131-H07, full insert sequence [Source:UniProtKB/TrEMBL;Acc:Q2RAM8]
LOC_Os11g06720	OS11G0167800	11	3278451	3279419	46783.3	12414.9	-1.91392	0.122991	24162.2	16549.3	-0.545981	0.625504	14713.3	756.455	-4.28172	0.00072112	12645.6	9545.37	-0.405763	0.710786	42533.5	1663.05	-4.6767	0.000294159	36651.3	7461.56	-2.29631	0.0460506	ABA/WDS induced protein, expressed; Abscisic acid-and stress-induced protein-rice; Os11g0167800 protein; cDNA clone:001-035-D06, full insert sequence; cDNA clone:001-041-E02, full insert sequence; cDNA clone:001-207-A11, full insert sequence; cDNA clone:J013000K20, full insert sequence [Source:UniProtKB/TrEMBL;Acc:Q53JF7]
LOC_Os11g27264	OS11G0460800	11	15683051	15694779	5946.68	1176.48	-2.33761	0.103841	3.12557	0.968477	-1.69033	0.743963	321.767	7.10286	-5.50147	0.000457098	155.61	372.756	1.26029	0.325989	975.933	16.9856	-5.84439	0.000251608	2265.69	50.8592	-5.4773	0.000294519	Os11g0460800 protein; Serine carboxypeptidase family protein, expressed; cDNA clone:J013092B20, full insert sequence [Source:UniProtKB/TrEMBL;Acc:Q0ISU2]
LOC_Os11g30560	OS11G0499600	11	17785138	17792540	7117.22	3426.1	-1.05475	0.392397	2636.42	2946.11	0.16023	0.894374	1054.3	73.9881	-3.83285	0.00288389	909.633	2450.04	1.42945	0.213204	1941.86	299.565	-2.6965	0.0297759	4007.36	622.104	-2.68743	0.0255583	Os11g0499600 protein; Oxidoreductase, short chain dehydrogenase/reductase family protein, expressed [Source:UniProtKB/TrEMBL;Acc:Q2R3W3]
LOC_Os11g32650	OS11G0530600	11	19277597	19281006	14716.2	4513.77	-1.705	0.162616	3345.92	4424.97	0.403263	0.721717	903.687	152.712	-2.56501	0.0294606	723.129	2310.85	1.6761	0.131937	2966.97	277.947	-3.41611	0.00518855	9113.28	1532.41	-2.57217	0.0255922	Chalcone synthase 1 [Source:UniProtKB/Swiss-Prot;Acc:Q2R3A1]
LOC_Os11g45990	OS11G0687100	11	27828727	27835243	273.174	49.5132	-2.46394	0.0581946	164.092	84.2575	-0.961632	0.417109	31863.8	19.5329	-10.6718	1.53e-10	43.4793	82.5724	0.925331	0.43757	32.5033	0	-10000000000	0.00507593	72.4108	13.2676	-2.4483	0.0499434	Os11g0687100 protein; von Willebrand factor type A domain containing protein, expressed [Source:UniProtKB/TrEMBL;Acc:Q2QZH3]
LOC_Os12g12580	OS12G0226900	12	6916185	6918431	1759.48	369.196	-2.25269	0.157633	151.59	199.506	0.396257	0.794124	503.678	15.9814	-4.97803	0.00296978	281.471	150.99	-0.898539	0.527118	1061.77	18.5298	-5.84049	0.000917363	1478.7	24.324	-5.92581	0.000563096	NADP-dependent oxidoreductase P2, putative, expressed; Os12g0226900 protein; cDNA clone:006-201-E06, full insert sequence; cDNA clone:J023105O06, full insert sequence [Source:UniProtKB/TrEMBL;Acc:Q2QVJ6]
LOC_Os12g33120	OS12G0515800	12	20042293	20043043	2981.42	2444.98	-0.286174	0.797477	6601.21	1982.47	-1.73543	0.148746	2445.04	17.1652	-7.15422	2.08e-06	1927.96	436.454	-2.14318	0.0717583	2520.26	7.72074	-8.35062	3.38e-07	2530.57	27.2723	-6.53588	7.06e-06	Expressed protein; cDNA clone:J013098I09, full insert sequence [Source:UniProtKB/TrEMBL;Acc:Q2QPV9]
DE genes in F274-2a, 8391, 8753
LOC_Os03g29540	OS03G0409100	3	16836622	16840754	787.212	2434.22	1.62864	0.216329	492.277	1157.33	1.23326	0.30992	637.666	1227.61	0.94498	0.435731	416.486	2773.25	2.73524	0.0264149	507.552	3214.92	2.66316	0.0364888	1007.08	6397.2	2.66726	0.030717	Os03g0409100 protein [Source:UniProtKB/TrEMBL;Acc:Q0DR85]	qAG3, Baltazar et al., 2014
LOC_Os03g51530	OS03G0725200	3	29479234	29479879	171.835	1209.84	2.81572	0.0780313	78.1393	589.802	2.91611	0.056033	24.4504	185.858	2.92627	0.0590775	35.47	726.637	4.35657	0.00618117	68.3403	701.044	3.3587	0.0317753	112.427	2350.58	4.38595	0.0056135	Expressed protein; Os03g0725200 protein; cDNA clone:002-105-B05, full insert sequence [Source:UniProtKB/TrEMBL;Acc:Q6AU08]	qAG3-1, Angaji et al., 2010
LOC_Os04g40040	OS04G0476100	4	23829769	23832791	3986	8656.2	1.11879	0.352752	1592.48	4255.49	1.41805	0.199755	2147.72	5164.96	1.26595	0.252124	2752.93	12337.5	2.16401	0.0488098	3319.51	18539.1	2.48153	0.0314016	3263.25	21786.2	2.73903	0.0152431	Os04g0476100 protein [Source:UniProtKB/TrEMBL;Acc:Q0JCE5]
LOC_Os04g41970	OS04G0497200	4	24863994	24867715	126.306	699.105	2.46858	0.121884	48.4464	171.42	1.82308	0.226468	455.755	1060.1	1.21787	0.401441	72.0841	672.375	3.22151	0.0324864	65.0066	1863.79	4.84151	0.00335979	112.427	930.207	3.04856	0.0418666	Endoglucanase 12 [Source:UniProtKB/Swiss-Prot;Acc:Q7XUK4]
LOC_Os05g13940	OS05G0227600	5	7746542	7748227	57589.8	35279.8	-0.706973	0.558584	30841.6	14324.7	-1.10637	0.346205	15462.4	10218.1	-0.597646	0.607296	7102	39295	2.46805	0.0384959	23905.8	4428.62	-2.43243	0.0487381	78922	11321	-2.80143	0.0211896	Os05g0227600 protein; Proline-rich protein; Putative repetitive proline rich protein [Source:UniProtKB/TrEMBL;Acc:Q84PC5]	qAG5, Jiang et al., 2006
LOC_Os06g21250	OS06G0317400	6	12287597	12288808	4464.78	1204.46	-1.8902	0.179705	831.402	991.72	0.254387	0.848086	70.4171	11.2462	-2.64649	0.0621164	68.6515	772.642	3.49244	0.0112478	651.733	10.809	-5.91397	0.00025494	2348.59	322.845	-2.86288	0.0324056	Os06g0317400 protein; Putative glycine rich protein; cDNA, clone: J065155L01, full insert sequence [Source:UniProtKB/TrEMBL;Acc:Q5Z4P5]
LOC_Os06g46970	OS06G0683700	6	28490039	28490684	425.917	630.217	0.565276	0.733586	98.4555	541.379	2.45909	0.0904211	82.1533	504.303	2.6179	0.0723919	50.3445	876.447	4.12176	0.00661102	82.5084	2589.54	4.97201	0.00193625	173.405	1443.96	3.05781	0.0345923	Os06g0683600 protein; Putative uncharacterized protein P0009H10.12; cDNA clone:J033133F14, full insert sequence [Source:UniProtKB/TrEMBL;Acc:Q655G5]
LOC_Os06g46980	OS06G0683800	6	28493187	28493877	7.3434	216.889	4.88437	0.0685802	3.12557	39.7075	3.66722	0.179569	2.93405	80.4991	4.77801	0.0697609	3.43258	260.693	6.24692	0.0201733	1.66684	208.46	6.96651	0.0149913	1.90555	342.01	7.48769	0.00874112	Os06g0683800 protein; Putative uncharacterized protein P0009H10.13; cDNA clone:002-169-C08, full insert sequence [Source:UniProtKB/TrEMBL;Acc:Q655G4]
LOC_Os09g26200	OS09G0431750	9	15810286	15810823	308.423	67.8116	-2.18531	0.214853	1203.34	169.483	-2.82783	0.0904607	458.689	73.9881	-2.63215	0.114224	299.778	22.4125	-3.74152	0.0306745	721.74	6.1766	-6.86852	0.000897122	566.9	51.5963	-3.45776	0.0409429	Putative uncharacterized protein OSJNBa0016E03.47; Putative uncharacterized protein OSJNBa0039E17.11 [Source:UniProtKB/TrEMBL;Acc:Q69MJ5]
LOC_Os11g39000	OS11G0603000	11	23222907	23224222	2.93736	58.1242	4.30655	0.164008	3.12557	25.1804	3.01011	0.311805	6.84611	152.12	4.47378	0.0952623	0	125.038	Inf	0.0154423	1.66684	299.565	7.48961	0.0156944	1.90555	173.216	6.50622	0.0286295	Helix-loop-helix DNA-binding domain containing protein, expressed; Os11g0603000 protein; cDNA clone:002-181-B06, full insert sequence [Source:UniProtKB/TrEMBL;Acc:Q2R1J3]	qAG11, Jiang et al., 2006
LOC_Os12g44020	OS12G0637100	12	27303890	27307145	481.727	2066.64	2.101	0.151193	131.274	357.368	1.44483	0.289594	719.82	1162.5	0.691526	0.606957	138.447	1248.02	3.17224	0.0225885	183.352	1386.65	2.91891	0.0403265	235.335	1539.04	2.70925	0.0480687	Expressed protein; Os12g0637100 protein; cDNA clone:001-014-G03, full insert sequence [Source:UniProtKB/TrEMBL;Acc:Q2QLL9]
DE genes in Nipponbare, IR64
LOC_Os02g43410	OS02G0650300	2	26200136	26204468	27.9049	555.409	4.31496	0.0351952	31.2557	591.739	4.24277	0.0300914	7.82413	0	-10000000000	0.0744027	14.8745	106.165	2.83539	0.127977	5.00051	55.5894	3.47466	0.0903351	911.804	444.465	-1.03665	0.543704	Iron-phytosiderophore transporter YSL15 [Source:UniProtKB/Swiss-Prot;Acc:Q6H3Z3]	qAG2, Septiningsih et al., 2013
LOC_Os10g35460	OS10G0497700	10	18976009	18979062	91.0581	1758.8	4.27166	0.00412598	4.68836	77.4781	4.04664	0.014033	2809.84	3418.84	0.283021	0.829833	757.455	2284.9	1.5929	0.209423	53.3388	205.372	1.94498	0.153342	212.468	338.324	0.671158	0.597413	COBRA-like protein 4 [Source:UniProtKB/Swiss-Prot;Acc:Q8W3E8]
LOC_Os12g44350		12	27491864	27493254	4.40604	450.463	6.67578	0.0309384	0	205.317	Inf	0.0148792	3.91206	61.5581	3.97595	0.150728	1.14419	43.6454	5.25343	0.0953533	0.833418	1.54415	0.889699	1	12.3861	12.5305	0.0167305	1	Actin-1, putative, expressed
DE genes in Nipponbare, F291
LOC_Os01g45914	OS01G0647200	1	26086062	26088337	11463	1699.59	-2.75373	0.0249942	20014.6	12857.5	-0.638442	0.555216	3078.79	347.448	-3.14749	0.00706506	5503.56	2209.4	-1.31671	0.219247	5133.86	2733.14	-0.909482	0.417703	17323.3	5062.33	-1.77484	0.104192	expressed protein	qAG1-2, Angaji et al., 2010
LOC_Os02g40240	OS02G0615800	2	24350730	24354486	4485.35	67.8116	-6.04754	0.00135377	4.68836	8.71629	0.894632	0.754582	40.0986	0.591905	-6.08204	0.00580885	122.429	57.8007	-1.08278	0.477629	7.50076	1.54415	-2.28023	0.447049	1.90555	0	-10000000000	0.49635	Os02g0615800 protein; Putative uncharacterized protein P0407A09.33 [Source:UniProtKB/TrEMBL;Acc:Q6K7X0]	qAG2-1, Angaji et al., 2010
LOC_Os06g01250	OS06G0102100	6	163259	165320	6992.38	999.951	-2.80585	0.0452217	525.096	683.745	0.380877	0.764918	199.515	10.6543	-4.22699	0.00312714	146.457	207.611	0.503407	0.684559	1012.6	220.813	-2.19717	0.0936261	3385.2	777.63	-2.12209	0.0917652	Os06g0102100 protein; Putative cytochrome P450; cDNA clone:001-205-H03, full insert sequence; cDNA clone:J013023N04, full insert sequence [Source:UniProtKB/TrEMBL;Acc:Q5VRI5]
LOC_Os06g01790	OS06G0107100	6	454843	457220	619.783	22.0657	-4.81189	0.0270963	376.631	123.965	-1.60322	0.386171	58.6809	2.95953	-4.30945	0.0458073	83.526	15.3349	-2.44541	0.204479	315.866	29.3388	-3.42843	0.0889592	596.436	87.7137	-2.76549	0.140639	Putative uncharacterized protein P0644B06.44-1; cDNA clone:J013161L13, full insert sequence [Source:UniProtKB/TrEMBL;Acc:Q5VS59]
LOC_Os06g39240	OS06G0592500	6	23293383	23294073	19.0928	409.022	4.42108	0.0439167	1.56279	2.90543	0.894632	1	14.6702	797.888	5.76522	0.00876994	13.7303	175.761	3.67818	0.0684241	9.1676	40.1479	2.13071	0.305609	101.947	622.104	2.60934	0.168441	Os06g0592500 protein; Putative ethylene-responsive transcriptional coactivator; cDNA clone:002-157-H08, full insert sequence; cDNA clone:J033114G13, full insert sequence [Source:UniProtKB/TrEMBL;Acc:Q69XD8]
LOC_Os09g28440	OS09G0457900	9	17306100	17307199	7.3434	402.564	5.77663	0.00291741	0	0.968477	Inf	1	53.7909	520.877	3.27551	0.0450775	132.726	796.234	2.58474	0.0954478	0.833418	3.0883	1.8897	0.702465	1886.49	985.489	-0.936794	0.527796	Ethylene-binding protein-like; Os09g0457900 protein; cDNA clone:J013098P10, full insert sequence [Source:UniProtKB/TrEMBL;Acc:Q67U00]
LOC_Os09g31430	OS09G0491100	9	18905351	18908421	1758.01	161.994	-3.43993	0.0163009	489.152	209.191	-1.22546	0.331623	862.61	56.8229	-3.92416	0.00445421	645.324	129.757	-2.31422	0.0683676	2138.55	662.44	-1.69077	0.191011	6456.94	1474.18	-2.13094	0.0906495	Beta-glucosidase 30 [Source:UniProtKB/Swiss-Prot;Acc:Q0J0N4]
LOC_Os10g31490		10	16498478	16497720	0	140.467	Inf	0.0258432	0	2.90543	Inf	0.672994	1.95603	577.699	8.20625	0.0103946	0	23.5921	Inf	0.0907104	0	24.7064	Inf	0.073046	0	0.73709	Inf	1	retrotransposon protein, putative, unclassified, expressed
LOC_Os10g37180	OS10G0516100	10	19894753	19896794	17768.1	2950.88	-2.59007	0.0346173	7073.17	4742.63	-0.576669	0.594808	4567.33	791.377	-2.52891	0.0271762	5484.11	3348.9	-0.71157	0.503122	6550.67	1417.53	-2.20826	0.053841	15192	3863.09	-1.97548	0.0730523	Glycine cleavage system H protein, mitochondrial [Source:UniProtKB/Swiss-Prot;Acc:A3C6G9]
LOC_Os11g46000	OS11G0687200	11	27841513	27846793	176.242	19.3747	-3.18531	0.0268094	32.8185	4.84238	-2.76072	0.0733773	16231.1	15.3895	-10.0426	9.03e-09	18.3071	23.5921	0.365904	0.825127	5.00051	0	-10000000000	0.292831	15.2444	5.15963	-1.56294	0.30482	Expressed protein; cDNA clone:002-124-G07, full insert sequence [Source:UniProtKB/TrEMBL;Acc:B7F036]
LOC_Os12g12720	OS12G0228700	12	7011412	7012569	1.46868	398.258	8.08304	0.0326393	0	0	NA	NA	0	75.172	Inf	0.0431155	0	1.17961	Inf	0.990456	0	0	NA	NA	0	1.47418	Inf	0.773031	jasmonate-induced protein, putative, expressed
LOC_Os12g29160		12	17263634	17268209	2163.36	138.852	-3.96165	0.0208239	32.8185	17.4326	-0.912723	0.587946	485.096	11.8381	-5.35676	0.00211742	70.9399	77.854	0.134174	0.938339	110.011	91.1048	-0.272052	0.875484	1726.43	512.277	-1.75279	0.233149	LTPL105 - Protease inhibitor/seed storage/LTP family protein precursor, putative, expressed
DE genes in Nipponbare, F274-2a
LOC_Os01g03390	OS01G0124650	1	1365586	1366432	378.919	2770.59	2.87023	0.0360776	248.483	893.904	1.84697	0.145323	1478.76	1280.88	-0.207249	0.862523	894.758	5601.95	2.64636	0.036012	212.522	903.327	2.08764	0.10615	593.578	1077.63	0.860347	0.478243	cDNA clone:001-125-E08, full insert sequence; cDNA clone:J023130E04, full insert sequence [Source:UniProtKB/TrEMBL;Acc:B7E9D7]
LOC_Os01g09220	OS01G0186900	1	4646434	4648130	333.39	11721.7	5.13583	7.62e-05	50.0091	37.7706	-0.404928	0.749411	9778.2	12255.4	0.325776	0.769109	2772.38	22516.3	3.02178	0.00781571	408.375	199.195	-1.03571	0.363683	11534.3	9906.49	-0.219482	0.836129	cDNA clone:001-117-G12, full insert sequence [Source:UniProtKB/TrEMBL;Acc:B7EXU7]
LOC_Os01g47760	OS01G0667900	1	27326050	27327025	315.766	4196.78	3.73236	0.0047795	223.478	241.151	0.1098	0.934721	3866.1	5038.89	0.382228	0.747115	913.065	7258.12	2.99081	0.0136052	265.027	1016.05	1.93876	0.11139	1578.75	2186.95	0.470139	0.680822	Monothiol glutaredoxin-S5 [Source:UniProtKB/Swiss-Prot;Acc:Q5QLR2]	qAG1-2, Angaji et al., 2010
LOC_Os01g50410	OS01G0699500	1	28939657	28941009	27.9049	1244.29	5.47866	0.00127798	3.12557	7.74781	1.30967	0.627916	1382.91	355.143	-1.96124	0.169559	227.694	1985.28	3.12417	0.0315088	9.1676	18.5298	1.01523	0.567299	1003.27	925.048	-0.117111	0.931202	Os01g0699500 protein [Source:UniProtKB/TrEMBL;Acc:Q0JK35]	qAG1-2, Angaji et al., 2010
LOC_Os01g53730	OS01G0739500	1	30885172	30886338	71.9653	3201.67	5.47538	0.000224929	25.0046	28.0858	0.167651	0.945991	1370.2	2507.31	0.871754	0.481689	713.976	5136.01	2.8467	0.0244247	44.1712	260.961	2.56266	0.0529412	1885.54	1907.59	0.0167734	0.98986	Cold induced protein-like; Os01g0739500 protein; Uncharacterized protein [Source:UniProtKB/TrEMBL;Acc:Q94JH8]	qAG1-2, Angaji et al., 2010
LOC_Os01g57730	OS01G0787000	1	33382428	33384487	39.6543	610.842	3.94525	0.0481283	7.81393	42.613	2.44717	0.226462	164.307	477.667	1.53962	0.382142	21.7397	846.957	5.28389	0.00778962	15.0015	134.341	3.16272	0.0975628	226.76	288.939	0.349599	0.837735	Class III peroxidase 19; Os01g0787000 protein; Putative peroxidase; Uncharacterized protein [Source:UniProtKB/TrEMBL;Acc:Q8S130]	qAG1-2, Angaji et al., 2010
LOC_Os01g61080	OS01G0826400	1	35347982	35350546	51.4038	1956.31	5.25012	0.0017712	15.6279	53.2662	1.7691	0.263686	547.689	2448.71	2.16059	0.134168	152.178	1322.34	3.11926	0.0326092	15.0015	49.4128	1.71977	0.270817	327.754	118.671	-1.46564	0.29358	Os01g0826400 protein; Uncharacterized protein; WRKY transcription factor 24; WRKY24; cDNA clone:002-125-B01, full insert sequence [Source:UniProtKB/TrEMBL;Acc:Q6IEQ7]	qAG1-2, Angaji et al., 2010
LOC_Os01g67810	OS01G0905200	1	39408313	39410361	127.775	1320.17	3.36905	0.0294824	21.879	50.3608	1.20275	0.43476	452.821	970.724	1.10012	0.428834	162.475	2220.02	3.77228	0.0103596	45.838	128.164	1.48338	0.305702	1795.02	565.348	-1.66679	0.222311	Leucine zipper protein-like [Source:UniProtKB/TrEMBL;Acc:Q5N6V2]	qAG1-2, Angaji et al., 2010
LOC_Os01g67820	OS01G0905300	1	39411052	39413189	7.3434	491.365	6.0642	0.00698249	1.56279	5.81086	1.89463	0.617348	397.074	338.57	-0.229956	0.892323	42.3351	805.671	4.25026	0.027413	5.83393	43.2362	2.8897	0.157784	309.651	204.174	-0.600846	0.727605	Uncharacterized protein [Source:UniProtKB/TrEMBL;Acc:B9EVF9]	qAG1-2, Angaji et al., 2010
LOC_Os01g72530	OS01G0955100	1	42074192	42074866	35.2483	1701.21	5.59286	0.00129113	6.25114	5.81086	-0.105368	1	1022.03	773.028	-0.40284	0.773278	135.015	1060.47	2.97351	0.044379	5.83393	6.1766	0.0823442	1	935.623	722.348	-0.373234	0.787964	Probable calcium-binding protein CML31 [Source:UniProtKB/Swiss-Prot;Acc:Q8RYK0]
LOC_Os01g74370	OS01G0975000	1	43078802	43080400	7.3434	1070.99	7.18828	0.000703285	9.37671	8.71629	-0.105368	1	347.196	1744.94	2.32935	0.160357	24.028	475.381	4.30629	0.0154507	9.1676	27.7947	1.60019	0.390724	13.3388	86.9766	2.705	0.115806	Os01g0975000 protein [Source:UniProtKB/TrEMBL;Acc:Q0JFK4]
LOC_Os02g04130	OS02G0134200	2	1799750	1800811	155.68	2277.61	3.87086	0.00896523	35.9441	44.5499	0.30967	0.850489	1601.01	1594	-0.00633182	0.991976	281.471	2254.23	3.00157	0.0259879	72.5074	118.899	0.713542	0.598793	953.726	1798.5	0.915147	0.472812	Os02g0134200 protein; Putative uncharacterized protein P0030G11.22; Putative uncharacterized protein P0585B01.7 [Source:UniProtKB/TrEMBL;Acc:Q6Z6I0]
LOC_Os02g21040	OS02G0314600	2	12464431	12466397	61.6845	992.955	4.00875	0.0252963	9.37671	30.0228	1.6789	0.367635	389.25	815.645	1.06724	0.498338	61.7864	1292.85	4.38712	0.0104561	35.837	67.9426	0.922866	0.577513	316.321	257.981	-0.294121	0.847383	Os02g0314600 protein; Putative chloroplast nucleoid DNA binding protein; cDNA clone:J013170E21, full insert sequence [Source:UniProtKB/TrEMBL;Acc:Q6Z6Q8]
LOC_Os02g22160	OS02G0327500	2	13200808	13203751	80.7774	1621.02	4.32681	0.00882355	60.9486	106.532	0.805627	0.593332	217.12	1398.08	2.68689	0.0719657	73.2283	1250.38	4.09382	0.00838721	81.675	486.407	2.5742	0.0894462	184.838	882.296	2.255	0.118996	Os02g0327500 protein; Putative uncharacterized protein OSJNBb0042G06.17; Putative uncharacterized protein P0622F08.2; cDNA clone:J023026H02, full insert sequence [Source:UniProtKB/TrEMBL;Acc:Q6YWE7]
LOC_Os02g34410	OS02G0548700	2	20588289	20589687	86.6521	2293.75	4.72633	0.00159378	21.879	43.5815	0.994168	0.496784	1187.31	3018.72	1.34624	0.296901	369.574	4148.67	3.48872	0.00966788	55.839	231.622	2.05243	0.12863	385.873	1043.72	1.43553	0.256218	Os02g0548700 protein [Source:UniProtKB/TrEMBL;Acc:Q0E0I9]
LOC_Os02g35329	OS02G0559800	2	21250083	21251343	11.7494	979.5	6.38138	0.00130285	0	5.81086	Inf	0.292846	1175.57	380.595	-1.62704	0.302136	67.5073	652.322	3.27247	0.0457385	5.00051	0	-10000000000	0.347169	689.808	338.324	-1.02779	0.501067	E3 ubiquitin-protein ligase EL5 [Source:UniProtKB/Swiss-Prot;Acc:Q9LRB7]	qAG2-1, Angaji et al., 2010
LOC_Os02g41510	OS02G0624300	2	24878777	24879932	7.3434	513.43	6.12758	0.00483915	1.56279	15.4956	3.30967	0.211554	320.789	580.067	0.854594	0.620343	26.3164	916.554	5.12218	0.00824806	1.66684	24.7064	3.8897	0.0874599	194.366	448.888	1.20758	0.471459	Os02g0624300 protein; Putative myb protein; cDNA clone:001-110-C03, full insert sequence [Source:UniProtKB/TrEMBL;Acc:Q6K1S6]
LOC_Os02g42640	OS02G0639300	2	25646627	25648251	1.46868	185.675	6.98211	0.0329393	1.56279	2.90543	0.894632	1	10.7582	87.0101	3.01575	0.231596	4.57677	568.57	6.95687	0.0154751	2.50025	12.3532	2.30474	0.44537	4.76387	17.6902	1.89274	0.472738	Putative uncharacterized protein [Source:UniProtKB/TrEMBL;Acc:A3A9F4]
LOC_Os02g45780	OS02G0682300	2	27887212	27888250	116.026	1156.03	3.31666	0.0389057	15.6279	133.65	3.09627	0.0533737	511.502	1311.07	1.35793	0.347565	65.219	934.248	3.84044	0.0125354	71.674	566.703	2.98307	0.0521421	324.896	1232.41	1.92344	0.178427	Os02g0682300 protein; Putative uncharacterized protein OJ1123_G04.7 [Source:UniProtKB/TrEMBL;Acc:Q6EU38]	qAG2, Septiningsih et al., 2013
LOC_Os02g47470	OS02G0703600	2	28995717	28998452	237.926	7312.35	4.94175	0.000192703	184.409	227.592	0.303543	0.79826	2924.27	5853.35	1.00119	0.377088	1320.4	12901.4	3.28848	0.00534348	311.698	1205.98	1.95198	0.0956237	3313.75	8338.7	1.33136	0.230746	Abscisic acid 8'-hydroxylase 1 [Source:UniProtKB/Swiss-Prot;Acc:Q05JG2]	qAG2, Jiang et al., 2004; qAG2, Septiningsih et al., 2013
LOC_Os02g50570	OS02G0739100	2	30882052	30886269	214.427	1548.9	2.85269	0.0455969	156.279	111.375	-0.488697	0.710366	1035.72	1565.59	0.596073	0.646261	265.453	2665.91	3.3281	0.0137006	172.518	199.195	0.207439	0.872462	3214.66	1056.25	-1.60571	0.207925
LOC_Os02g52010	OS02G0756800	2	31840547	31841768	199.74	2079.55	3.38008	0.0168621	32.8185	61.014	0.894632	0.52118	1303.7	3656.79	1.48797	0.244243	307.788	3055.18	3.31125	0.0123325	165.017	622.292	1.91498	0.144536	1309.11	1297.28	-0.0130992	0.991437	Os02g0756800 protein; Putative phosphate-induced protein 1; cDNA clone:001-118-C09, full insert sequence [Source:UniProtKB/TrEMBL;Acc:Q0DXF4]
LOC_Os02g52670	OS02G0764700	2	32204425	32205335	4.40604	1244.29	8.14162	7.8e-05	3.12557	0.968477	-1.69033	0.759085	441.085	1711.79	1.95638	0.196064	46.9119	1463.89	4.96371	0.00301744	11.6679	1.54415	-2.91766	0.254085	217.232	297.784	0.455029	0.755022	AP2 domain-containing transcription factor-like; Os02g0764700 protein; cDNA clone:002-124-D09, full insert sequence [Source:UniProtKB/TrEMBL;Acc:Q6Z7P9]
LOC_Os03g04070	OS03G0133000	3	1862381	1864245	52.8725	831.499	3.97513	0.0254411	7.81393	74.5727	3.25453	0.0733162	2237.7	284.706	-2.97447	0.067706	34.3258	730.176	4.41088	0.00994897	8.33418	30.883	1.8897	0.292159	89.5607	105.404	0.23499	0.883638	No apical meristem protein, expressed; Os03g0133000 protein [Source:UniProtKB/TrEMBL;Acc:Q10S65]
LOC_Os03g05750	OS03G0152000	3	2866379	2868145	132.181	5253.24	5.31262	0.000173667	245.357	148.177	-0.727563	0.543993	1368.24	2410.83	0.817204	0.49301	693.38	7556.56	3.44601	0.0058007	255.859	117.355	-1.12447	0.365635	2261.88	3829.18	0.759511	0.511386	Heavy metal-associated domain containing protein, expressed; Os03g0152000 protein [Source:UniProtKB/TrEMBL;Acc:Q10RN8]
LOC_Os03g08320	OS03G0180900	3	4236724	4238058	74.9026	3120.95	5.38082	0.000560495	56.2603	37.7706	-0.574853	0.686443	833.269	1395.12	0.743535	0.570456	362.709	4412.91	3.60484	0.00892425	49.1717	16.9856	-1.53351	0.307394	828.913	182.061	-2.1868	0.0963589	Os03g0180900 protein; Putative uncharacterized protein OSJNBa0050H14.23; Putative uncharacterized protein OSJNBb0076N15.9; ZIM motif family protein, expressed; cDNA clone:J033051K03, full insert sequence [Source:UniProtKB/TrEMBL;Acc:Q8GRS2]
LOC_Os03g08330	OS03G0181100	3	4248884	4249820	284.924	8160.53	4.84001	0.000258468	42.1952	80.3836	0.929821	0.449363	6404.05	2671.86	-1.26114	0.266527	1974.88	14696.7	2.89566	0.0129535	137.514	216.181	0.65266	0.573816	3996.88	3124.52	-0.355239	0.746095	Os03g0181100 protein; ZIM motif family protein, expressed; cDNA clone:J013123K19, full insert sequence [Source:UniProtKB/TrEMBL;Acc:Q10QW3]
LOC_Os03g08520	OS03G0183500	3	4379668	4380736	14.6868	2013.9	7.09933	6.3e-05	1.56279	5.81086	1.89463	0.557328	370.668	677.731	0.870586	0.527398	218.541	4225.35	4.2731	0.00408848	15.0015	0	-10000000000	0.0572433	366.818	433.409	0.240665	0.85819	Expressed protein; Os03g0183500 protein; Putative uncharacterized protein OSJNBa0032G08.10; cDNA clone:001-110-D07, full insert sequence [Source:UniProtKB/TrEMBL;Acc:Q10QU0]
LOC_Os03g13840	OS03G0241900	3	7500164	7503768	543.411	5260.78	3.27516	0.0102684	234.418	328.314	0.485992	0.679632	2546.75	6221.52	1.28861	0.265273	1496.6	14446.6	3.27097	0.00639605	345.035	348.978	0.0163911	0.98495	1913.17	1227.99	-0.639663	0.566802	Os03g0241900 protein; Senescence-associated protein, expressed; cDNA clone:J013072L11, full insert sequence; cDNA clone:J013096B20, full insert sequence [Source:UniProtKB/TrEMBL;Acc:Q10P99]
LOC_Os03g17700	OS03G0285800	3	9847723	9850384	271.706	2662.41	3.29262	0.0191456	64.0742	215.97	1.75302	0.182615	1626.44	2361.7	0.538109	0.671738	519.463	3215.61	2.63	0.0402787	143.348	835.385	2.54292	0.0563571	1364.37	1119.64	-0.285202	0.815349	Mitogen-activated protein kinase 5 [Source:UniProtKB/Swiss-Prot;Acc:Q10N20]
LOC_Os03g17870	OS03G0288000	3	9957175	9958291	38.1857	1015.02	4.73233	0.0131577	162.53	616.92	1.92438	0.2465	39.1206	68.661	0.811561	0.635089	62.9306	1437.94	4.5141	0.011497	18.3352	112.723	2.62009	0.137374	43.8276	100.244	1.19361	0.464949	Metallothionein-like protein 1B [Source:UniProtKB/Swiss-Prot;Acc:Q10N03]
LOC_Os03g19070	OS03G0302800	3	10677797	10678946	64.6219	652.283	3.3354	0.0403106	23.4418	22.275	-0.0736591	1	504.656	1385.06	1.45657	0.317224	188.792	1419.07	2.91007	0.0493075	129.18	81.8399	-0.658505	0.671709	616.444	1160.18	0.912305	0.516356	Long cell-linked locus protein, putative, expressed; Os03g0302800 protein; cDNA clone:006-301-B04, full insert sequence [Source:UniProtKB/TrEMBL;Acc:Q10MM6]
LOC_Os03g20090	OS03G0315400	3	11326096	11328222	30.8423	1007.49	5.02971	0.00313488	7.81393	19.3695	1.30967	0.482951	276.778	1893.5	2.77426	0.0627899	177.35	2513.74	3.82517	0.0120123	11.6679	30.883	1.40427	0.393388	166.735	425.301	1.35092	0.33815	Myb-like DNA-binding domain containing protein, expressed; Os03g0315400 protein; cDNA clone:J013130B13, full insert sequence [Source:UniProtKB/TrEMBL;Acc:Q10MB4]
LOC_Os03g21640	OS03G0334200	3	12354875	12358539	208.552	2078.48	3.31705	0.0262248	59.3859	156.893	1.40159	0.31423	825.445	2230.89	1.43438	0.287766	291.769	2115.03	2.85778	0.0370739	141.681	319.639	1.1738	0.389976	571.664	597.78	0.0644468	0.962212	Expressed protein; Os03g0334200 protein; cDNA clone:J013058K09, full insert sequence; cDNA clone:J013066N20, full insert sequence [Source:UniProtKB/TrEMBL;Acc:Q10LU7]
LOC_Os03g25760	OS03G0374500	3	14739099	14741603	41.123	788.982	4.26197	0.0171518	59.3859	57.1401	-0.0556149	0.984335	365.778	1270.82	1.79672	0.251797	81.2376	1131.24	3.79962	0.0209587	80.0082	165.224	1.0462	0.508181	66.6941	487.953	2.87111	0.072218	Calmodulin-binding family protein, putative, expressed; Putative uncharacterized protein OSJNBa0090L05.14 [Source:UniProtKB/TrEMBL;Acc:Q7Y169]
LOC_Os03g28940	OS03G0402800	3	16407695	16410007	985.484	6956.07	2.81937	0.0233521	768.891	701.177	-0.132999	0.903885	4827.49	6495.57	0.428183	0.707139	2064.12	10386.4	2.3311	0.0406454	703.405	1031.49	0.552304	0.624849	4404.67	3238.04	-0.443915	0.685643	Os03g0402800 protein; Putative uncharacterized protein OSJNBb0041J20.5; ZIM motif family protein, expressed; cDNA clone:001-040-E06, full insert sequence; cDNA clone:J013034A17, full insert sequence [Source:UniProtKB/TrEMBL;Acc:Q84R94]	qAG3, Baltazar et al., 2014
LOC_Os03g47530	OS03G0678800	3	26878159	26879403	60.2158	1253.44	4.3796	0.00688839	64.0742	54.2347	-0.240528	0.87929	725.688	1574.47	1.11744	0.427078	207.099	1671.5	3.01275	0.0367773	105.844	123.532	0.222943	0.876635	400.165	1062.88	1.40932	0.30631	Glycosyl transferase family 8 protein, expressed; Os03g0678800 protein [Source:UniProtKB/TrEMBL;Acc:Q10F74]	qAG3-1, Angaji et al., 2010
LOC_Os03g53020	OS03G0741100	3	30406830	30409342	36.717	2254.47	5.94019	0.000301463	20.3162	16.4641	-0.303307	0.885571	817.621	1862.73	1.18791	0.377657	199.089	2756.74	3.79147	0.00791567	27.5028	7.72074	-1.83277	0.279467	989.931	555.029	-0.834767	0.521656	Helix-loop-helix DNA-binding domain containing protein, expressed; Os03g0741100 protein; Putative helix-loop-helix DNA-binding protein [Source:UniProtKB/TrEMBL;Acc:Q75KV9]	qAG3-1, Angaji et al., 2010
LOC_Os03g55800	OS03G0767000	3	31764991	31766985	437.666	3622	3.04888	0.0257389	170.344	240.182	0.495682	0.697531	2501.76	3093.89	0.306475	0.80704	353.555	4435.32	3.64903	0.00540515	230.857	492.583	1.09337	0.384275	646.933	723.085	0.160549	0.895141	Allene oxide synthase 1, chloroplastic [Source:UniProtKB/Swiss-Prot;Acc:Q7Y0C8]
LOC_Os04g23550	OS04G0301500	4	13466455	13468869	16.1555	4113.9	7.99234	7.69e-07	6.25114	4.84238	-0.368402	0.977534	2220.1	4343.4	0.968203	0.422546	606.422	8236.01	3.76355	0.00334732	19.1686	3.0883	-2.63386	0.146434	1021.37	874.926	-0.223278	0.848299	Os04g0301500 protein; cDNA, clone: J075170K16, full insert sequence [Source:UniProtKB/TrEMBL;Acc:Q0JEB7]
LOC_Os04g30420	OS04G0372700	4	18168726	18170981	149.805	1605.95	3.42227	0.0202579	145.339	103.627	-0.488022	0.716553	898.796	945.273	0.0727358	0.960883	397.035	4586.31	3.53	0.0108574	47.5048	21.6181	-1.13584	0.452244	1213.83	584.512	-1.05427	0.41191	Os04g0372700 protein [Source:UniProtKB/TrEMBL;Acc:Q0JDV3]
LOC_Os04g33640	OS04G0412300	4	20372912	20377754	39.6543	623.221	3.97419	0.0186681	17.1906	43.5815	1.34209	0.417668	391.206	1616.49	2.04687	0.171977	180.782	2240.07	3.63122	0.0191226	35.837	225.446	2.65326	0.0913049	70.5052	277.146	1.97484	0.181894	Os04g0412300 protein; cDNA clone:J023078I08, full insert sequence [Source:UniProtKB/TrEMBL;Acc:Q0JDD4]
LOC_Os04g37430	OS04G0447100	4	22305669	22309225	246.738	1981.6	3.00562	0.0403723	131.274	116.217	-0.175757	0.899817	742.314	1454.9	0.970821	0.465413	229.983	3282.84	3.83535	0.00668901	129.18	129.709	0.00589213	0.997115	1316.73	517.437	-1.34751	0.300015	Putative lipoxygenase 5 [Source:UniProtKB/Swiss-Prot;Acc:Q7XV13]
LOC_Os04g38790	OS04G0461600	4	23059610	23060936	82.246	1687.75	4.35902	0.00466045	28.1301	60.0456	1.09394	0.455188	1145.26	2023.72	0.821342	0.539723	252.866	3939.88	3.96171	0.00569171	55.839	67.9426	0.283042	0.846488	159.113	249.136	0.646883	0.622795	Os04g0461600 protein [Source:UniProtKB/TrEMBL;Acc:Q0JCM6]
LOC_Os04g43440	OS04G0514600	4	25708429	25712602	38.1857	814.277	4.41442	0.0140232	35.9441	73.6042	1.03404	0.531297	356.976	918.637	1.36367	0.381171	83.526	1330.6	3.9937	0.0160335	37.5038	188.386	2.32858	0.154697	334.423	389.92	0.221504	0.884314	OSJNBb0070J16.6 protein; OSJNBb0072M01.2 protein [Source:UniProtKB/TrEMBL;Acc:Q7X8S5]
LOC_Os04g43680	OS04G0517100	4	25843041	25844875	223.239	8866.63	5.31172	0.000105003	92.2043	315.723	1.77575	0.13667	5610.88	3983.52	-0.494182	0.662146	688.804	9511.16	3.78746	0.0020775	139.181	634.645	2.18899	0.0697664	1330.07	2706.59	1.02497	0.362869	Myb-related protein Myb4 [Source:UniProtKB/Swiss-Prot;Acc:Q7XBH4]
LOC_Os04g44900	OS04G0531400	4	26572754	26575020	126.306	1538.68	3.60669	0.0231623	40.6324	101.69	1.32348	0.374549	508.568	1492.78	1.55349	0.275874	157.899	1461.53	3.21041	0.0285616	48.3383	375.228	2.95653	0.0512964	228.666	939.052	2.03797	0.149093	Os04g0531400 protein [Source:UniProtKB/TrEMBL;Acc:Q0JBH7]
LOC_Os04g51460	OS04G0604300	4	30482211	30483492	489.07	3314.69	2.76076	0.040036	82.8276	126.87	0.615172	0.633135	2138.92	4515.05	1.07786	0.380034	112.131	5629.08	5.64964	7.31e-05	215.855	376.772	0.803628	0.51622	724.108	855.024	0.239761	0.841229	Os04g0604300 protein; cDNA clone:J023062B10, full insert sequence [Source:UniProtKB/TrEMBL;Acc:Q0JAD6]
LOC_Os04g52504	OS04G0615200	4	31219893	31220898	161.555	1603.26	3.31091	0.0409933	68.7626	133.65	0.958762	0.52465	381.426	1316.99	1.78777	0.224809	133.87	1153.65	3.1073	0.0384921	72.5074	551.261	2.92654	0.0589835	301.076	219.653	-0.454905	0.748032	OSJNBa0008M17.8 protein; Os04g0615200 protein [Source:UniProtKB/TrEMBL;Acc:Q7XN09]
LOC_Os04g58850	OS04G0685300	4	35001018	35002142	2562.85	13910	2.4403	0.041482	1364.31	1022.71	-0.415774	0.700641	6797.21	11847	0.801505	0.466552	2968.03	20107.6	2.76016	0.0139986	2722.78	2669.83	-0.0283295	0.987484	8806.48	11063.7	0.329198	0.757724	OSJNBa0088H09.15 protein; Os04g0685300 protein; cDNA clone:001-035-C10, full insert sequence; cDNA clone:J023054G10, full insert sequence [Source:UniProtKB/TrEMBL;Acc:Q7XPU1]
LOC_Os05g02760	OS05G0119100	5	993324	993804	2.93736	313.763	6.73901	0.00999046	0	8.71629	Inf	0.234551	131.054	542.185	2.04862	0.303708	29.749	634.628	4.415	0.0379942	2.50025	16.9856	2.76417	0.266998	31.4415	151.103	2.26479	0.253752	Putative uncharacterized protein [Source:UniProtKB/TrEMBL;Acc:B9FM66]
LOC_Os05g07010	OS05G0162800	5	3679907	3681238	1.46868	275.552	7.55166	0.00773771	0	0	NA	NA	135.944	90.5615	-0.586045	0.764576	35.47	1147.76	5.01608	0.022841	0	0	NA	NA	26.6777	59.7043	1.1622	0.562211		qAG5, Jiang et al., 2006
LOC_Os05g39720	OS05G0474800	5	23310508	23313449	14.6868	1108.13	6.23746	0.00391166	3.12557	19.3695	2.6316	0.262791	141.812	988.482	2.80123	0.121447	25.1722	458.867	4.18817	0.0268683	3.33367	4.63245	0.474662	0.981987	110.522	22.1127	-2.32138	0.192958	Os05g0474800 protein; WRKY transcription factor 70 [Source:UniProtKB/TrEMBL;Acc:Q65WW1]
LOC_Os05g51130	OS05G0588900	5	29331773	29333125	124.838	952.591	2.9318	0.0408029	168.781	202.412	0.262141	0.848752	721.776	4138.6	2.51952	0.0592284	418.774	4738.48	3.50018	0.00992047	138.347	197.651	0.51466	0.694301	201.035	280.094	0.478464	0.706622	Putative AAA-type ATPase [Source:UniProtKB/TrEMBL;Acc:Q6L566]
LOC_Os06g11240	OS06G0215900	6	5894911	5896347	80.7774	1414.89	4.1306	0.0195289	40.6324	56.1717	0.467211	0.789865	484.118	775.988	0.680676	0.661988	107.554	975.534	3.18113	0.0471537	24.1691	217.725	3.17127	0.0599057	227.713	183.535	-0.311158	0.837525	Putative 12-oxophytodienoate reductase 4 [Source:UniProtKB/Swiss-Prot;Acc:Q69TH8]	qAG6, Septiningsih et al., 2013
LOC_Os06g13180	OS06G0239100	6	7224948	7226317	17.6242	453.153	4.68437	0.0476854	0	16.4641	Inf	0.12052	134.966	438.01	1.69837	0.402566	11.4419	329.11	4.84617	0.0314433	8.33418	83.384	3.32266	0.136671	60.0247	142.995	1.25234	0.526639	Os06g0239100 protein; Putative metalloproteinase [Source:UniProtKB/TrEMBL;Acc:Q67VB1]
LOC_Os06g13190	OS06G0239200	6	7230221	7230662	359.826	7562.6	4.39351	0.00269287	4.68836	16.4641	1.81217	0.320854	99.7576	432.683	2.11681	0.108092	32.0374	345.625	3.43138	0.0121587	254.193	952.74	1.90616	0.148096	1393.91	1889.16	0.438611	0.723376	Os06g0239200 protein; Putative uncharacterized protein OSJNBa0052G07.19; Putative uncharacterized protein OSJNBa0068B06.28 [Source:UniProtKB/TrEMBL;Acc:Q67VB0]
LOC_Os06g40180	OS06G0604300	6	23921940	23924919	42.5917	1333.63	4.96864	0.0071155	26.5674	16.4641	-0.69033	0.709467	666.029	499.568	-0.414904	0.78516	100.689	1246.84	3.6303	0.0279358	39.1707	12.3532	-1.66489	0.361264	94.3245	286.728	1.60398	0.302285	Phospholipase D [Source:UniProtKB/TrEMBL;Acc:Q69X21]
LOC_Os06g44010	OS06G0649000	6	26510006	26511606	8.81208	1585.5	7.49124	0.000230961	3.12557	19.3695	2.6316	0.218878	533.997	609.662	0.19118	0.905976	101.833	1382.5	3.763	0.0213951	7.50076	15.4415	1.0417	0.602322	233.429	163.634	-0.512515	0.733594	Os06g0649000 protein [Source:UniProtKB/TrEMBL;Acc:Q0DAJ3]
LOC_Os07g05830	OS07G0153000	7	2801920	2803989	0	111.943	Inf	0.0455043	0	0.968477	Inf	1	33.2525	127.852	1.94293	0.471381	2.28838	254.795	6.79886	0.0374972	0	10.809	Inf	0.189646	0.952773	5.15963	2.43706	0.556802
LOC_Os07g34690	OS07G0531200	7	20789837	20790707	0	311.072	Inf	0.0112044	0	0	NA	NA	11.7362	361.062	4.94321	0.0693036	1.14419	90.8297	6.31076	0.0463928	0	3.0883	Inf	0.497823	1.90555	14.0047	2.87763	0.334152	Os07g0531200 protein; Putative uncharacterized protein P0681F05.128; cDNA clone:002-180-D10, full insert sequence [Source:UniProtKB/TrEMBL;Acc:Q8GVN9]	qAG7.2, Septiningsih et al., 2013
LOC_Os07g36170	OS07G0545800	7	21614976	21619678	666.78	7601.89	3.51107	0.00759612	304.743	300.228	-0.0215363	0.985931	1705.66	6709.84	1.97595	0.100092	480.561	2905.37	2.59593	0.0301484	426.71	756.633	0.826337	0.486016	2978.37	1623.07	-0.875796	0.445151	Chitin-inducible gibberellin-responsive protein 1 [Source:UniProtKB/Swiss-Prot;Acc:Q69VG1]
LOC_Os07g36630	OS07G0551700	7	21910226	21915284	1666.95	161.994	-3.3632	0.0244078	1370.56	996.563	-0.459736	0.72108	95.8455	422.028	2.13856	0.115267	54.9212	634.628	3.53048	0.0116716	881.757	492.583	-0.840012	0.534911	2505.79	1509.56	-0.73114	0.566188	Probable mixed-linked glucan synthase 8 [Source:UniProtKB/Swiss-Prot;Acc:Q84S18]
LOC_Os07g38170	OS07G0569100	7	22889318	22890939	1777.1	13094.1	2.88132	0.0169022	789.207	1122.46	0.508195	0.645694	14632.1	11504.3	-0.346967	0.746463	4274.7	22484.5	2.39503	0.030545	1671	2289.97	0.454615	0.676019	8226.24	5263.56	-0.644196	0.545766	Os07g0569100 protein; Remorin-like protein [Source:UniProtKB/TrEMBL;Acc:Q7XII4]	qAG7.3, Septiningsih et al., 2013
LOC_Os08g04350	OS08G0137900	8	2133669	2134479	1.46868	1543.52	10.0375	0.000105652	0	10.6532	Inf	0.151084	212.229	903.247	2.0895	0.228902	14.8745	398.707	4.74442	0.0132839	1.66684	1.54415	-0.110301	1	22.8666	27.2723	0.254198	0.904192	Os08g0137900 protein; Putative blue copper binding protein [Source:UniProtKB/TrEMBL;Acc:Q6ZJW2]
LOC_Os08g04370	OS08G0138200	8	2140382	2140954	0	412.789	Inf	0.00500593	0	3.87391	Inf	0.538282	112.472	277.604	1.30346	0.56426	1.14419	264.232	7.85133	0.010082	0.833418	4.63245	2.47466	0.567297	5.71664	5.89672	0.0447449	1	Os08g0138200 protein; Putative blue copper binding protein [Source:UniProtKB/TrEMBL;Acc:Q6ZJV9]
LOC_Os08g28710	OS08G0374600	8	17558610	17559521	2.93736	3146.78	10.0651	4.44e-07	1.56279	0.968477	-0.69033	1	968.236	2276.47	1.23337	0.354671	211.676	3481.02	4.03958	0.00467988	10.001	10.809	0.112092	1	78.1274	43.4883	-0.845202	0.529289
LOC_Os08g36920	OS08G0374701	8	17559580	17560192	2.93736	1765.79	9.23158	1.44e-06	6.25114	2.90543	-1.10537	0.688117	963.346	1262.53	0.390197	0.766405	443.947	5606.67	3.65869	0.0077311	13.3347	3.0883	-2.1103	0.302104	967.065	798.268	-0.276739	0.82561	Receptor kinase-like [Source:UniProtKB/TrEMBL;Acc:Q6ZDH7]
LOC_Os08g37670	OS08G0474000	8	23353856	23354936	2435.07	18255.3	2.90628	0.0160822	629.803	1043.05	0.727836	0.50995	8316.07	17849.5	1.10191	0.317974	2574.43	19966	2.95522	0.00909333	989.268	3451.17	1.80265	0.111308	3225.14	2954.99	-0.126206	0.90532	Os08g0474000 protein [Source:UniProtKB/TrEMBL;Acc:Q0J525]	qAG8-1, Angaji et al., 2010
LOC_Os08g43270	OS08G0482700	8	23858723	23860121	3698.13	490.288	-2.9151	0.044699	439.143	736.042	0.745099	0.567746	209.295	358.695	0.777215	0.553612	67.5073	532.002	2.97832	0.0272359	585.06	994.432	0.765289	0.554808	2835.45	956.005	-1.56849	0.21988	Putative uncharacterized protein OJ1111_H02.14 [Source:UniProtKB/TrEMBL;Acc:Q6ZFF0]	qAG8-1, Angaji et al., 2010
LOC_Os09g16510	OS08G0546100	8	27357179	27358774	276.112	2256.08	3.03049	0.0360357	32.8185	166.578	2.34362	0.09408	1486.58	1515.28	0.0275808	0.98805	223.117	2325	3.38136	0.0134688	86.6755	200.739	1.21163	0.368034	1516.81	1220.62	-0.31343	0.803783	Putative BAG domain containing protein [Source:UniProtKB/TrEMBL;Acc:Q6ZFW2]
LOC_Os09g17146	OS09G0334500	9	10128837	10131086	2.93736	341.211	6.86	0.0138027	3.12557	0.968477	-1.69033	0.801939	144.746	455.767	1.65477	0.43348	12.5861	351.523	4.80371	0.0394818	10.001	13.8973	0.474662	0.876627	29.536	75.9202	1.36201	0.516056	Os09g0334500 protein; WRKY family transcription factor-like [Source:UniProtKB/TrEMBL;Acc:Q6ERI5]
LOC_Os09g17152	OS09G0341500	9	10520072	10521663	13.2181	1470.87	6.798	0.000218281	10.9395	6.77934	-0.69033	0.7675	582.897	1060.69	0.863695	0.548383	138.447	2153.96	3.95958	0.00995213	20.002	43.2362	1.11209	0.482171	306.793	686.231	1.16143	0.407945	Os09g0341500 protein; cDNA clone:J033076F19, full insert sequence [Source:UniProtKB/TrEMBL;Acc:Q0J2H8]
LOC_Os09g20090	OS09G0365900	9	12030044	12035203	38.1857	1728.12	5.50003	0.00211042	23.4418	36.8021	0.650706	0.709415	1018.11	1228.8	0.271345	0.858748	17.1629	883.525	5.68591	0.00114118	26.6694	231.622	3.11852	0.053929	31.4415	184.272	2.5511	0.0977038	Putative syringolide-induced protein B13-1-1 [Source:UniProtKB/TrEMBL;Acc:Q69QG3]	qAG9-2, Angaji et al., 2010
LOC_Os09g25760	OS09G0425900	9	15444237	15446516	549.286	3868.49	2.81614	0.036655	95.3299	225.655	1.24312	0.324437	2428.41	1996.5	-0.282544	0.812165	743.725	4079.08	2.4554	0.0470915	208.355	398.39	0.935142	0.451985	2443.86	1270.01	-0.944329	0.428989	Os09g0425900 protein; Putative senescence-associated protein 5; Senescence-associated protein-like protein; cDNA clone:001-208-A07, full insert sequence [Source:UniProtKB/TrEMBL;Acc:Q84VG2]
LOC_Os10g25290	OS10G0392400	10	13069770	13070894	85.1834	4185.48	5.61868	0.000118417	28.1301	147.208	2.38767	0.0691633	1688.06	4694.4	1.47558	0.226557	767.753	6770.94	3.14064	0.0122696	81.675	223.902	1.4549	0.246682	967.065	926.522	-0.0617877	0.958148	Os10g0392400 protein; ZIM motif family protein, expressed; cDNA clone:001-027-G06, full insert sequence [Source:UniProtKB/TrEMBL;Acc:Q7XEZ1]
LOC_Os10g37760	OS10G0521900	10	20207343	20209484	104.276	2225.4	4.41558	0.00378904	23.4418	88.1314	1.91057	0.184431	1547.22	2085.87	0.430973	0.746637	276.895	2664.73	3.26658	0.0176694	63.3398	111.179	0.811697	0.555123	520.214	708.343	0.445343	0.72961	Putative membrane protein [Source:UniProtKB/TrEMBL;Acc:Q8LNI7]
LOC_Os10g40640	OS10G0555100	10	21798929	21802616	124.838	1736.19	3.7978	0.0145302	28.1301	30.9913	0.139745	0.962339	533.019	2330.33	2.12828	0.129862	147.601	1857.88	3.65388	0.0120726	135.847	494.128	1.8629	0.189619	251.532	487.953	0.956001	0.477343	Glycogenin glucosyltransferase; Glycogenin, putative, expressed; Os10g0555100 protein; Putative uncharacterized protein OSJNBb0014I11.6 [Source:UniProtKB/TrEMBL;Acc:Q9AV15]
LOC_Os10g42410	OS10G0574700	10	22829592	22831346	650.625	6564.8	3.33485	0.00991949	537.598	683.745	0.346929	0.769467	3324.28	4958.39	0.576832	0.621391	1051.51	7995.37	2.9267	0.0144867	490.883	778.251	0.664855	0.56862	1653.06	1513.98	-0.126792	0.9103	Expressed protein; Os10g0574700 protein; Putative uncharacterized protein OSJNBa0003O19.3; cDNA, clone: J065006H13, full insert sequence [Source:UniProtKB/TrEMBL;Acc:Q336P6]
LOC_Os11g05380	OS11G0151400	11	2390496	2392366	13.2181	2725.92	7.68808	2.72e-06	7.81393	42.613	2.44717	0.10402	1962.88	1539.55	-0.350466	0.769838	479.417	7174.36	3.9035	0.00303477	33.3367	112.723	1.7576	0.180668	2524.85	1340.03	-0.913933	0.444753	Cytochrome P450; Cytochrome P450 family protein, expressed; Os11g0151400 protein [Source:UniProtKB/TrEMBL;Acc:Q53PZ7]
LOC_Os11g29290	OS11G0483000	11	16985426	16986181	52.8725	904.692	4.09684	0.044782	1.56279	13.5587	3.11702	0.263219	157.461	188.226	0.257474	0.891926	53.777	1073.44	4.31911	0.0253147	9.1676	38.6037	2.07412	0.298162	89.5607	56.0188	-0.676954	0.702502
LOC_Os12g03050	OS12G0123800	12	1146995	1148742	1.46868	424.091	8.17371	0.0121241	1.56279	2.90543	0.894632	1	27.3844	196.513	2.84319	0.236989	5.72096	244.178	5.41553	0.0416034	5.83393	50.9569	3.12674	0.224626	7.62219	15.4789	1.02202	0.696233	NAC domain-containing protein 77 [Source:UniProtKB/Swiss-Prot;Acc:Q5CD17]
LOC_Os12g08130	OS12G0181600	12	4144620	4146619	299.611	4616.57	3.94566	0.00375333	323.497	237.277	-0.447179	0.709693	2874.39	3071.99	0.0959175	0.940453	938.238	6211.81	2.72699	0.0260996	287.529	251.696	-0.192025	0.886855	1588.27	1029.71	-0.625215	0.592135	Amino acid transporter, putative, expressed; Os12g0181600 protein; cDNA clone:001-202-G09, full insert sequence; cDNA clone:006-308-D07, full insert sequence [Source:UniProtKB/TrEMBL;Acc:Q2QWV1]
LOC_Os12g25660	OS12G0443000	12	14866174	14867766	4.40604	439.699	6.64089	0.0187988	0	2.90543	Inf	0.653121	50.8568	209.534	2.04267	0.362251	6.86515	473.022	6.10647	0.0184426	5.00051	0	-10000000000	0.439923	7.62219	0.73709	-3.37029	0.291979	Cytochrome P450 family protein, expressed; Os12g0443000 protein [Source:UniProtKB/TrEMBL;Acc:Q2QS17]
LOC_Os12g36910	OS12G0556200	12	22628910	22632952	666.78	5164.44	2.95333	0.0264262	278.176	254.709	-0.127145	0.916713	894.884	2323.82	1.37672	0.258104	479.417	5691.6	3.56948	0.00515755	348.369	815.311	1.22673	0.317477	1010.89	2935.83	1.53814	0.197143	Calmodulin-binding protein, putative, expressed; Os12g0556200 protein [Source:UniProtKB/TrEMBL;Acc:Q2QNS3]	qAG12, Septiningsih et al., 2013
LOC_Os12g40180	OS12G0592900	12	24871763	24872331	19.0928	543.031	4.82993	0.0123558	9.37671	42.613	2.18414	0.24336	117.362	207.759	0.823945	0.617222	45.7677	686.531	3.90692	0.0246107	23.3357	216.181	3.21163	0.0689553	230.571	1645.18	2.83497	0.0875058	Expressed protein; Os12g0592900 protein; cDNA clone:001-125-F07, full insert sequence; cDNA clone:002-188-E08, full insert sequence [Source:UniProtKB/TrEMBL;Acc:Q2QMS6]	qAG12, Septiningsih et al., 2013
DE genes in Nipponbare, 8391
LOC_Os01g37690	OS01G0557500	1	21071497	21076720	2317.58	299.77	-2.95069	0.0457839	1247.1	689.555	-0.854842	0.51183	653.315	170.469	-1.93827	0.14904	726.562	323.212	-1.1686	0.362384	1086.78	146.694	-2.88917	0.0394685	2556.29	456.259	-2.48613	0.0629632	Vacuolar cation/proton exchanger 1a [Source:UniProtKB/Swiss-Prot;Acc:Q769E5]	qAG1-2, Angaji et al., 2010
LOC_Os01g42860	OS01G0615100	1	24392841	24393423	2.93736	604.922	7.68609	0.00280347	3.12557	9.68477	1.6316	0.577769	70.4171	1016.89	3.8521	0.0572805	28.6048	158.067	2.46621	0.198453	0.833418	165.224	7.63117	0.00415001	6.66941	103.93	3.9619	0.0590483	Os01g0615100 protein; Protease inhibitor-like; Subitilisin-chymotrypsin inhibitor; Uncharacterized protein; cDNA clone:001-103-H12, full insert sequence [Source:UniProtKB/TrEMBL;Acc:Q5ZDX2]	qAG1,Jiang et al., 2004; qAG1-2, Angaji et al., 2010
LOC_Os01g64110	OS01G0860500	1	37239583	37240775	86.6521	1621.02	4.22552	0.0092505	6.25114	57.1401	3.19231	0.0631479	614.194	3321.18	2.43493	0.0949663	100.689	402.246	1.99817	0.157787	18.3352	382.949	4.38446	0.00669124	89.5607	225.549	1.33251	0.343101	Chitinase; Os01g0860500 protein; cDNA clone:001-007-A04, full insert sequence; cDNA clone:006-203-C02, full insert sequence; cDNA clone:J023091F16, full insert sequence [Source:UniProtKB/TrEMBL;Acc:O49827]	qAG1-2, Angaji et al., 2010
LOC_Os02g44320	OS02G0662100	2	26814637	26815393	31197.7	4866.29	-2.68055	0.0332271	40493.3	28843.2	-0.489454	0.65834	9773.31	2306.65	-2.08305	0.0713744	9574.6	8312.68	-0.203898	0.850788	33710.9	5881.66	-2.51892	0.0331005	20753.3	4900.91	-2.08222	0.0660279	Os02g0662100 protein; Putative ZmGR1a; cDNA clone:001-010-F04, full insert sequence [Source:UniProtKB/TrEMBL;Acc:Q6H6L8]	qAG2, Septiningsih et al., 2013
LOC_Os03g20949	OS03G0326100	3	11886200	11888887	95.4641	954.744	3.32208	0.0472636	35.9441	122.028	1.76339	0.263089	300.251	1029.91	1.77829	0.240821	171.629	1128.88	2.71753	0.0736149	15.0015	381.405	4.66814	0.00680741	245.815	852.076	1.79341	0.226344	Phospholipid-transporting ATPase 1, putative, expressed [Source:UniProtKB/TrEMBL;Acc:Q10M23]
LOC_Os04g46980	OS04G0556500	4	27848596	27850314	54.3411	994.031	4.19317	0.0241578	9.37671	43.5815	2.21656	0.235168	333.503	542.777	0.702658	0.666728	185.359	570.929	1.62299	0.306171	25.0025	307.286	3.61943	0.0420884	132.435	618.418	2.22329	0.171512	OSJNBb0012E24.11 protein; Os04g0556500 protein; cDNA clone:J023012B12, full insert sequence [Source:UniProtKB/TrEMBL;Acc:Q7XU03]
LOC_Os04g58280	OS04G0679400	4	34694367	34696099	1310.06	15256.5	3.54172	0.0038684	1086.14	1511.79	0.477055	0.66558	11538.6	11245.6	-0.0371106	0.968684	7089.42	14922	1.0737	0.31344	1199.29	6490.06	2.43605	0.0344542	5887.19	19821.8	1.75144	0.108576	Putative uncharacterized protein [Source:UniProtKB/TrEMBL;Acc:A3AYP1]
LOC_Os05g12410	OS05G0215066	5	7136965	7137684	252.613	15.0692	-4.06725	0.0378796	1.56279	2.90543	0.894632	1	4.89008	0.591905	-3.04642	0.294445	3.43258	12.9757	1.91844	0.383048	2969.47	69.4867	-5.41732	0.00539585	0	0	NA	NA	BURP domain-containing protein 6 [Source:UniProtKB/Swiss-Prot;Acc:Q6I5B2]	qAG5, Jiang et al., 2006
LOC_Os05g37060	OS05G0442400	5	21654183	21655380	1.46868	755.615	9.00699	0.000124095	0	3.87391	Inf	0.453353	1327.17	853.527	-0.636841	0.675977	775.762	684.172	-0.181257	0.904086	1.66684	29.3388	4.13763	0.0477292	2.85832	25.7981	3.17403	0.0965764	Os05g0442400 protein; Putative myb-like transcription factor; cDNA clone:002-124-C08, full insert sequence [Source:UniProtKB/TrEMBL;Acc:Q6F2M6]	qAG5, Jiang et al., 2004
LOC_Os06g36390	OS06G0559400	6	21372400	21374077	42.5917	1393.9	5.03242	0.00146126	70.3254	267.3	1.92634	0.163652	1264.57	1408.14	0.155141	0.911391	784.916	2780.33	1.82465	0.164523	58.3393	680.97	3.54505	0.0150674	165.783	1009.08	2.60567	0.0556782	Os06g0559400 protein; Putative uncharacterized protein OSJNBa0090E14.34; Putative uncharacterized protein P0528E12.5; cDNA clone:J013142H05, full insert sequence; cDNA clone:J013162F05, full insert sequence [Source:UniProtKB/TrEMBL;Acc:Q5Z7F9]
LOC_Os06g40940	OS06G0611900	6	24399546	24404035	20294.2	3637.07	-2.48022	0.042074	7987.4	5225.9	-0.612046	0.572126	3149.21	860.63	-1.87153	0.0947024	4264.4	3130.67	-0.445871	0.673622	7666.62	1419.07	-2.43364	0.0343703	16676.4	4754.23	-1.81052	0.0981963	P protein-like [Source:UniProtKB/TrEMBL;Acc:Q5N8C9]
LOC_Os06g50950	OS06G0725200	6	30838067	30839951	292.267	5992.17	4.35772	0.00161483	100.018	469.711	2.23151	0.0751009	1545.26	3070.21	0.990484	0.4124	1199.11	5768.27	2.26617	0.0603822	157.516	1899.3	3.5919	0.00639557	242.957	639.057	1.39524	0.241539	Os06g0725200 protein [Source:UniProtKB/TrEMBL;Acc:Q0D9D9]
LOC_Os07g37320	OS07G0559700	7	22353362	22355669	447.947	12517.7	4.8045	0.000256767	185.971	283.764	0.609609	0.597665	6409.92	11804.4	0.880943	0.435724	2238.04	7529.43	1.7503	0.11562	186.686	1740.26	3.22062	0.00823127	1149.04	878.611	-0.387138	0.723728	Os07g0559700 protein; Putative monosaccharide transporter 3 [Source:UniProtKB/TrEMBL;Acc:Q6Z401]	qAG7.3, Septiningsih et al., 2013
LOC_Os07g40690	OS07G0598000	7	24384408	24386661	2382.2	176.525	-3.75435	0.0173664	2330.11	2303.04	-0.016862	0.986487	115.406	15.9814	-2.85225	0.0541836	80.0935	95.5481	0.254543	0.860218	430.044	6.1766	-6.12153	0.000511732	140.058	32.4319	-2.11053	0.13413	Os07g0598000 protein; Putative NADPH HC toxin reductase; cDNA clone:001-207-B06, full insert sequence; cDNA clone:J023068M23, full insert sequence [Source:UniProtKB/TrEMBL;Acc:Q6ZJE8]	qAG7-2, Angaji et al., 2010; qAG7.3, Septiningsih et al., 2013
LOC_Os10g02750	OS10G0116800	10	1082947	1084984	0	180.831	Inf	0.0106526	0	1.93695	Inf	0.840278	34.2306	726.86	4.40832	0.0647515	33.1816	60.1599	0.85842	0.695513	2.50025	155.959	5.96295	0.0270629	20.961	22.1127	0.0771663	0.993341	Acid phosphatase, putative, expressed; Os10g0116800 protein; Purple acid phosphatase PAP1; Putative purple acid phosphatase; cDNA clone:002-171-E10, full insert sequence [Source:UniProtKB/TrEMBL;Acc:Q7XH73]
LOC_Os12g25090	OS12G0437800	12	14411366	14412019	4.40604	174.373	5.30655	0.0468399	6.25114	17.4326	1.47959	0.578865	57.7029	552.248	3.2586	0.143211	20.5955	38.927	0.918445	0.67721	0	415.376	Inf	0.00132173	20.0082	79.6057	1.99228	0.354217	Os12g0437800 protein; Subitilisin-chymotrypsin inhibitor [Source:UniProtKB/TrEMBL;Acc:Q5EII3]
LOC_Os12g39310	OS12G0582700	12	24184258	24186538	24.9675	861.637	5.10895	0.0138297	10.9395	2.90543	-1.91272	0.433105	376.536	196.513	-0.938167	0.586246	114.419	1154.83	3.33528	0.0652049	31.6699	0	-10000000000	0.0345014	37.1582	47.9108	0.366673	0.84394	Cytochrome P450 [Source:UniProtKB/TrEMBL;Acc:Q4U0D3]	qAG12, Septiningsih et al., 2013
DE genes in Nipponbare, 8753
LOC_Os01g06560	OS01G0159000	1	3091435	3092698	7.3434	1417.05	7.59222	0.00022186	12.5023	34.8652	1.47959	0.407349	431.305	1416.43	1.71548	0.272124	435.937	528.464	0.277683	0.852452	26.6694	143.606	2.42886	0.141251	2.85832	172.479	5.91511	0.00240016	cDNA clone:J023049H21, full insert sequence [Source:UniProtKB/TrEMBL;Acc:B7EHP2]
LOC_Os01g12464	OS01G0224300	1	6833058	6835244	30.8423	398.258	3.69072	0.0410805	151.59	165.61	0.127609	0.945256	323.723	870.101	1.42642	0.3688	415.342	817.467	0.976862	0.520075	90.0092	166.768	0.889699	0.57857	76.2219	760.677	3.31901	0.0442541	Os01g0224300 protein; Putative uncharacterized protein P0417G05.35; Putative uncharacterized protein P0492F05.1; Uncharacterized protein [Source:UniProtKB/TrEMBL;Acc:Q5NAG7]
LOC_Os01g18240	OS01G0285300	1	10217782	10219691	3380.9	498.899	-2.76059	0.0467303	2706.74	2079.32	-0.380447	0.753866	410.767	362.838	-0.178994	0.882334	249.434	640.526	1.3606	0.264596	1634.33	1085.54	-0.590294	0.645235	2792.58	420.141	-2.73265	0.0321991	Os01g0285300 protein; Putative MYB2; Putative transcription factor (Myb); Uncharacterized protein; cDNA clone:J013087D08, full insert sequence [Source:UniProtKB/TrEMBL;Acc:Q9AQV2]	qAG1-1, Angaji et al., 2010
LOC_Os01g36294	OS01G0543600	1	20124194	20126848	64.6219	0	-10000000000	0.0405869	0	0	NA	NA	0	0	NA	NA	0	2.35921	Inf	0.680736	0.833418	0	-10000000000	1	354.432	0	-10000000000	0.0103594
LOC_Os01g36350	OS01G0544200	1	20153482	20156277	353.952	3.76731	-6.55387	0.0371973	0	0	NA	NA	0.978016	0	-10000000000	0.851254	0	0	NA	NA	45.0046	3.0883	-3.86519	0.215056	249.627	0	-10000000000	0.00739737	cDNA clone:J013039G14, full insert sequence [Source:UniProtKB/TrEMBL;Acc:B7F5M5]
LOC_Os01g50910	OS01G0705200	1	29233040	29234256	17.6242	783.6	5.47449	0.000866914	25.0046	58.1086	1.21656	0.409943	975.082	2814.51	1.52929	0.258361	3870.8	662.939	-2.54569	0.0600971	11.6679	40.1479	1.78278	0.242492	30.4887	213.756	2.80962	0.0459731	Os01g0705200 protein; Uncharacterized protein; WSI18 protein induced by water stress; cDNA clone:001-125-H02, full insert sequence [Source:UniProtKB/TrEMBL;Acc:Q94JF2]	qAG1-2, Angaji et al., 2010
LOC_Os01g53750	OS01G0739700	1	30897747	30901040	80.7774	719.556	3.15508	0.0326282	439.143	938.454	1.0956	0.408359	770.676	1776.31	1.20468	0.363456	1273.49	894.141	-0.510208	0.68758	906.759	1329.51	0.552106	0.671954	81.9385	1397.52	4.09219	0.0043583	Os01g0739700 protein; Putative elicitor inducible beta-1,3-glucanase NtEIG-E76; cDNA clone:001-123-G07, full insert sequence [Source:UniProtKB/TrEMBL;Acc:Q5JNL0]	qAG1-2, Angaji et al., 2010
LOC_Os01g60600	OS01G0821300	1	35032858	35033657	20.5615	416.557	4.34049	0.0274962	26.5674	11.6217	-1.19283	0.534981	1348.68	275.828	-2.28971	0.181773	123.573	408.144	1.72372	0.296919	10.001	3.0883	-1.69526	0.528955	609.775	53.8075	-3.5024	0.0477272	Os01g0821300 protein; WRKY transcription factor 64-like protein [Source:UniProtKB/TrEMBL;Acc:Q8RUJ6]	qAG1-2, Angaji et al., 2010
LOC_Os01g65210	OS01G0872600	1	37839529	37840372	3657.01	349.283	-3.3882	0.0258928	876.723	401.918	-1.12522	0.399401	196.581	52.0877	-1.91611	0.164921	125.861	140.373	0.157434	0.911005	655.067	120.444	-2.44328	0.0838543	2757.33	196.803	-3.80845	0.00795176	Os01g0872600 protein [Source:UniProtKB/TrEMBL;Acc:Q0JHB8]	qAG1-2, Angaji et al., 2010
LOC_Os01g70400	OS01G0929100	1	40785129	40786742	5529.58	801.36	-2.78665	0.0384603	2717.68	1522.45	-0.835987	0.482924	480.206	436.234	-0.13855	0.90518	717.409	719.56	0.00431956	0.998629	2461.92	543.54	-2.17932	0.0819885	4546.63	845.442	-2.42702	0.0470558	Os01g0929100 protein [Source:UniProtKB/TrEMBL;Acc:Q0JGD3]
LOC_Os01g70830	OS01G0934600	1	40999828	41000599	1722.76	85.5717	-4.33144	0.0195145	490.715	317.66	-0.627399	0.689107	44.9887	34.3305	-0.390073	0.817783	32.0374	55.4415	0.79121	0.63185	335.034	77.2074	-2.1175	0.205969	785.085	79.6057	-3.30191	0.0474632	Uncharacterized protein [Source:UniProtKB/TrEMBL;Acc:A3A197]
LOC_Os02g01150	OS02G0101500	2	78483	82952	11473.3	1831.99	-2.6468	0.0352546	3750.69	2641.04	-0.50605	0.648045	1886.59	551.064	-1.77549	0.121281	2199.14	1020.36	-1.10786	0.312467	6199.8	1352.67	-2.19641	0.0610293	10637.7	1586.22	-2.74553	0.017894	Os02g0101500 protein; Putative hydroxypyruvate reductase; cDNA clone:J013108J23, full insert sequence [Source:UniProtKB/TrEMBL;Acc:Q6YU90]
LOC_Os02g04760	OS02G0140500	2	2177575	2178755	279.049	0.538187	-9.0182	0.0140704	56.2603	11.6217	-2.27529	0.403006	2.93405	0.591905	-2.30945	0.636825	1.14419	0	-10000000000	1	34.1702	0	-10000000000	0.108048	220.091	0	-10000000000	0.00938286
LOC_Os02g26600	OS02G0464900	2	15617478	15618995	16.1555	286.315	4.14751	0.0450737	96.8927	197.569	1.0279	0.567261	319.811	432.683	0.436089	0.808232	411.909	340.906	-0.272952	0.872791	193.353	202.284	0.0651411	0.966015	8.57496	252.822	4.88185	0.0154541	Heat shock protein-related-like [Source:UniProtKB/TrEMBL;Acc:Q6K4W4]
LOC_Os02g33380	OS02G0537000	2	19834281	19835082	107.214	1.61456	-6.0532	0.0445649	459.459	18.4011	-4.64208	0.0751675	33.2525	1.18381	-4.81195	0.0977575	41.1909	1.17961	-5.12595	0.09683	35.837	0	-10000000000	0.0809088	182.932	1.47418	-6.95526	0.019784	Os02g0537000 protein; Putative uncharacterized protein P0508B05.10; cDNA clone:001-108-A08, full insert sequence [Source:UniProtKB/TrEMBL;Acc:Q6ETW4]
LOC_Os02g36220	OS02G0571300	2	21853581	21863592	52.8725	0	-10000000000	0.0362414	79.7021	36.8021	-1.11483	0.672713	26.4064	0	-10000000000	0.0600222	46.9119	2.35921	-4.31358	0.162613	20.002	0	-10000000000	0.175205	305.84	0.73709	-8.69672	0.0144319	Ent-pimara-8(14),15-diene synthase [Source:UniProtKB/Swiss-Prot;Acc:Q6Z5J6]	qAG2-1, Angaji et al., 2010
LOC_Os02g42950	OS02G0643200	2	25839537	25842582	23.4989	245.951	3.38771	0.0400295	170.344	421.287	1.30636	0.366999	630.82	2300.14	1.86642	0.198298	779.195	662.939	-0.233109	0.865845	285.862	773.619	1.4363	0.322837	17.1499	280.831	4.03343	0.0106381	Protein YABBY 4 [Source:UniProtKB/Swiss-Prot;Acc:Q6H668]	qAG2, Septiningsih et al., 2013
LOC_Os02g47510	OS02G0704000	2	29026099	29028176	798.961	28.5239	-4.80788	0.0434905	82.8276	117.186	0.500612	0.815066	37.1646	12.43	-1.5801	0.458524	36.6142	11.7961	-1.6341	0.447885	204.187	40.1479	-2.3465	0.275637	242.004	6.63381	-5.18905	0.0255249	9-cis-epoxycarotenoid dioxygenase 1; Os02g0704000 protein; Putative 9-cis-epoxycarotenoid dioxygenase; cDNA clone:J013040C20, full insert sequence [Source:UniProtKB/TrEMBL;Acc:Q6YVJ0]	qAG2, Jiang et al., 2004; qAG2, Septiningsih et al., 2013
LOC_Os02g49920	OS02G0731900	2	30500236	30502286	2082.59	152.307	-3.77332	0.0199781	631.365	419.35	-0.590319	0.671606	98.7796	168.693	0.772115	0.593216	78.9493	259.513	1.71681	0.222942	522.553	143.606	-1.86346	0.205156	2153.27	262.404	-3.03667	0.0378652	3-ketoacyl-CoA synthase [Source:UniProtKB/TrEMBL;Acc:Q6Z2K7]
LOC_Os03g28300	OS03G0401100	3	16282782	16290478	1514.21	103.332	-3.87321	0.0326049	267.236	645.006	1.2712	0.423945	50.8568	15.9814	-1.67004	0.315272	97.2563	121.499	0.321085	0.840669	115.012	41.692	-1.46394	0.385581	1182.39	59.7043	-4.30773	0.0124018	Protein kinase domain containing protein, expressed [Source:UniProtKB/TrEMBL;Acc:Q10K10]
LOC_Os03g32460	OS03G0679700	3	26952053	26959001	170.367	0	-10000000000	0.0143047	120.334	52.2977	-1.20223	0.651805	0	0	NA	NA	0	1.17961	Inf	0.990355	22.5023	0	-10000000000	0.1665	151.491	0	-10000000000	0.0162289	Os03g0679700 protein; Thiamine biosynthesis protein thiC, putative, expressed; cDNA clone:J013044A21, full insert sequence; cDNA clone:J013159A12, full insert sequence [Source:UniProtKB/TrEMBL;Acc:Q10F62]	qAG3-1, Angaji et al., 2010
LOC_Os03g47610	OS03G0773800	3	32086041	32089677	7910.31	997.26	-2.98769	0.0212351	3428.75	2594.55	-0.402199	0.721494	1128.63	406.047	-1.47485	0.204444	1599.58	763.205	-1.06755	0.340607	3656.21	926.489	-1.9805	0.0968183	9532.5	830.7	-3.52045	0.00398085	Malate dehydrogenase [Source:UniProtKB/TrEMBL;Acc:Q7XZW5]
LOC_Os03g56280	OS03G0803066	3	33512945	33513227	11355.8	1841.14	-2.62476	0.0365049	2253.54	1941.8	-0.214799	0.844317	2014.71	752.311	-1.42117	0.210086	2734.62	1423.78	-0.941609	0.388443	4695.48	1332.6	-1.81703	0.117867	13330.3	2148.62	-2.63322	0.0224191
LOC_Os03g58850	OS03G0803100	3	33513238	33513648	58.7472	659.817	3.48948	0.0156484	310.994	400.949	0.366532	0.778986	1783.9	3118.16	0.805658	0.528174	4408.57	933.068	-2.24026	0.0786365	643.399	415.376	-0.631296	0.63258	29.536	734.878	4.63696	0.00123762	Expressed protein; Os03g0803100 protein; Unknow protein [Source:UniProtKB/TrEMBL;Acc:Q84SZ3]
LOC_Os03g58880	OS03G0803300	3	33519431	33520097	35.2483	656.588	4.21936	0.0318858	62.5114	58.1086	-0.105368	0.961335	50.8568	561.718	3.46533	0.0571115	70.9399	603.958	3.08978	0.0782908	85.0087	148.238	0.802236	0.641964	42.8748	769.522	4.16576	0.0239807
LOC_Os03g61740	OS03G0833100	3	35002945	35004094	1794.73	96.3355	-4.21955	0.0100558	1095.51	509.419	-1.10468	0.429567	112.472	47.9443	-1.23013	0.391375	157.899	139.194	-0.181906	0.899956	1368.47	239.343	-2.51541	0.0886899	1369.14	186.484	-2.87614	0.047213	Os03g0833100 protein [Source:UniProtKB/TrEMBL;Acc:Q0DM18]
LOC_Os04g05580	OS04G0141400	4	2826150	2830476	890.02	10.2256	-6.44359	0.0232415	1.56279	0.968477	-0.69033	1	0	1.77572	Inf	0.673341	0	0	NA	NA	30.0031	4.63245	-2.69526	0.336497	27.6304	0	-10000000000	0.0427235	Os04g0141400 protein [Source:UniProtKB/TrEMBL;Acc:Q0JF65]
LOC_Os04g11400	OS04G0191500	4	6231634	6232379	386.263	20.9893	-4.20186	0.0462884	357.878	215.97	-0.728634	0.683223	119.318	34.3305	-1.79725	0.331787	175.061	54.2619	-1.68985	0.347636	185.852	27.7947	-2.74128	0.161838	877.504	24.324	-5.17296	0.0115359	Os04g0191500 protein [Source:UniProtKB/TrEMBL;Acc:Q0JEX0]
LOC_Os04g35840	OS04G0439100	4	21842292	21848134	6168.45	823.964	-2.90425	0.0345088	812.648	1194.13	0.555259	0.652063	317.855	292.993	-0.117503	0.921337	390.17	749.05	0.940961	0.429467	935.095	358.243	-1.38418	0.272644	5803.34	462.892	-3.64814	0.00519622	Os04g0439100 protein [Source:UniProtKB/TrEMBL;Acc:Q0JD06]
LOC_Os04g41340	OS04G0490800	4	24527988	24530505	9196.87	1358.92	-2.75868	0.0347345	1915.98	2223.62	0.214833	0.856959	1035.72	282.339	-1.87513	0.115753	1731.16	830.443	-1.05979	0.350779	2139.38	945.019	-1.17878	0.325027	5801.44	1129.96	-2.36014	0.0462947	OSJNBa0076N16.12 protein; OSJNBa0084K20.14 protein; Os04g0490800 protein; cDNA clone:001-043-B10, full insert sequence [Source:UniProtKB/TrEMBL;Acc:Q7X7H3]
LOC_Os04g45330	OS04G0536300	4	26797695	26800253	70.4966	713.636	3.33956	0.0286297	321.934	504.576	0.648309	0.635933	619.084	2036.15	1.71764	0.211114	922.219	1561.8	0.760027	0.560478	520.053	755.089	0.537988	0.688556	20.0082	813.01	5.34461	0.000699331	Protein YABBY 5 [Source:UniProtKB/Swiss-Prot;Acc:Q0JBF0]
LOC_Os05g06940	OS05G0161800	5	3638255	3640497	14.6868	490.288	5.06104	0.0438098	0	27.1174	Inf	0.0762472	54.7689	44.3929	-0.303028	0.888675	26.3164	50.7231	0.946679	0.659517	22.5023	260.961	3.53569	0.121093	16.1971	402.451	4.635	0.0459029	Os05g0161800 protein; Putative uncharacterized protein OSJNBb0099P06.1 [Source:UniProtKB/TrEMBL;Acc:Q75IS2]	qAG5, Jiang et al., 2006
LOC_Os05g30010	OS05G0363500	5	17361511	17367196	8221.67	938.06	-3.13168	0.0132006	10109.7	5012.84	-1.01204	0.361933	2284.64	1173.16	-0.961575	0.387365	1835.28	1240.95	-0.564564	0.600685	6003.95	1897.76	-1.66161	0.148018	12472.8	1417.42	-3.13744	0.00718093	Os05g0363500 protein [Source:UniProtKB/TrEMBL;Acc:Q0DIT9]	qAG5, Jiang et al., 2004
LOC_Os05g35070	OS05G0425000	5	20815469	20820780	52.8725	686.727	3.69915	0.0432923	228.167	215.97	-0.0792551	0.960388	197.559	533.307	1.43268	0.378657	375.295	391.629	0.0614632	0.970357	330.034	290.3	-0.185069	0.92082	49.5442	538.075	3.44102	0.0429997	Os05g0424900 protein; Putative uncharacterized protein OJ1212_B02.13 [Source:UniProtKB/TrEMBL;Acc:Q60EN6]	qAG5, Jiang et al., 2004
LOC_Os06g15910	OS06G0270200	6	9033633	9037674	1307.12	99.5646	-3.71462	0.049959	426.64	316.692	-0.429941	0.791456	68.4611	90.5615	0.403613	0.819269	65.219	57.8007	-0.174204	0.92719	235.857	63.3101	-1.89741	0.277285	661.225	56.0188	-3.56116	0.0423833	Potassium transporter 24 [Source:UniProtKB/Swiss-Prot;Acc:Q5Z6K9]
LOC_Os06g28820	OS06G0483200	6	16400699	16432426	596.284	3.22912	-7.52871	0.00505687	64.0742	9.68477	-2.72595	0.222062	1.95603	0.591905	-1.72449	0.790725	2.28838	1.17961	-0.956024	1	60.8395	6.1766	-3.30013	0.171274	793.66	4.42254	-7.4875	0.00366126	Beta-amyrin synthase-like [Source:UniProtKB/TrEMBL;Acc:Q67VR1]
LOC_Os06g30950	OS06G0506200	6	18002712	18009339	9514.1	1421.35	-2.7428	0.0353617	2562.97	2212.97	-0.211832	0.851269	1052.34	228.475	-2.2035	0.0667791	463.398	614.575	0.407337	0.719248	3211.16	793.693	-2.01644	0.0953701	6077.74	1037.09	-2.551	0.0321148	Os06g0506200 protein; cDNA clone:J013119D13, full insert sequence [Source:UniProtKB/TrEMBL;Acc:Q0DBY8]
LOC_Os06g43600	OS06G0643500	6	26227109	26228735	1790.32	10792.8	2.59178	0.0356904	4392.99	12162.1	1.46912	0.196131	13988.6	43396.7	1.63334	0.15289	11050.6	36734.1	1.73299	0.119328	8686.72	31557.8	1.86111	0.109427	2721.12	24247.3	3.15555	0.00745304	Os06g0643500 protein; Putative cell wall protein; cDNA clone:J033137N14, full insert sequence [Source:UniProtKB/TrEMBL;Acc:Q67WV0]
LOC_Os06g46250	OS06G0675200	6	28018171	28019815	52.8725	707.716	3.74258	0.0301482	240.669	244.056	0.0201629	0.997681	938.895	449.256	-1.06343	0.479335	520.607	699.506	0.426141	0.770286	340.035	287.212	-0.243567	0.884951	35.2526	475.423	3.75341	0.0213763	Os06g0675200 protein; Putative uncharacterized protein P0778G11.12 [Source:UniProtKB/TrEMBL;Acc:Q651H6]
LOC_Os06g50930	OS06G0725000	6	30823392	30825734	69.0279	849.259	3.62095	0.016962	85.9532	276.984	1.68818	0.221071	820.555	1598.14	0.961725	0.474131	948.535	2157.5	1.18559	0.36109	287.529	1138.04	1.98477	0.151253	86.7024	1275.9	3.8793	0.00718478	Os06g0725000 protein; Putative Ntdin; cDNA clone:J023095D11, full insert sequence [Source:UniProtKB/TrEMBL;Acc:Q5Z984]
LOC_Os07g18154	OS07G0282300	7	10748746	10760846	2887.42	145.849	-4.30724	0.0123989	393.822	400.949	0.0258766	0.992678	43.0327	10.0624	-2.09646	0.190988	33.1816	228.844	2.78591	0.070159	178.352	44.7803	-1.99379	0.205784	1156.67	57.493	-4.33044	0.00753047	Probable aldehyde oxidase 4 [Source:UniProtKB/Swiss-Prot;Acc:Q69R21]	qAG7.1, Septiningsih et al., 2013; qAG7, Baltazar et al., 2014
LOC_Os07g25060	OS07G0432333	7	14303299	14304162	1.46868	248.642	7.40341	0.037411	0	70.6988	Inf	0.0543181	1.95603	46.1686	4.56091	0.142669	1.14419	82.5724	6.17326	0.0636356	0.833418	0	-10000000000	1	1.90555	162.16	6.41107	0.0430462	Putative uncharacterized protein OJ1051_D12.1; Putative uncharacterized protein OSJNBa0067K15.35; cDNA, clone: J100007M12, full insert sequence [Source:UniProtKB/TrEMBL;Acc:Q6YTL9]	qAG7, Baltazar et al., 2014
LOC_Os07g37400	OS07G0561300	7	22411227	22413069	26.4362	1166.79	5.46388	0.00251795	145.339	99.7531	-0.542989	0.720248	1371.18	492.465	-1.47732	0.324181	646.469	632.269	-0.0320421	0.983577	140.848	131.253	-0.101789	0.962208	36.2054	396.554	3.45324	0.0301038	Os07g0561300 protein; Putative uncharacterized protein P0406F06.10; Putative uncharacterized protein P0567H04.44; cDNA clone:J023149I22, full insert sequence [Source:UniProtKB/TrEMBL;Acc:Q6ZF52]	qAG7.3, Septiningsih et al., 2013
LOC_Os07g40900	OS07G0600000	7	24483487	24484920	409.762	1.07637	-8.57246	0.0039683	104.707	27.1174	-1.94906	0.376904	1.95603	1.18381	-0.724492	0.999191	0	2.35921	Inf	0.632633	12.5013	3.0883	-2.01719	0.509083	736.494	19.1643	-5.26418	0.0286409	Os07g0600000 protein; Vegetative cell wall protein gp1-like protein; cDNA clone:001-204-G04, full insert sequence [Source:UniProtKB/TrEMBL;Acc:Q8H598]	qAG7-2, Angaji et al., 2010; qAG7.3, Septiningsih et al., 2013
LOC_Os07g41180	OS07G0603100	7	24654907	24659846	124.838	970.889	2.95925	0.0460779	378.194	729.263	0.947312	0.480539	1108.09	1434.19	0.372155	0.78326	1739.17	515.488	-1.75439	0.182105	579.226	1344.95	1.21536	0.367754	52.4025	774.681	3.88589	0.00719082	Os07g0603100 protein; Putative Ras-GTPase activating protein SH3 domain-binding protein 2; cDNA clone:J033034P09, full insert sequence [Source:UniProtKB/TrEMBL;Acc:Q6YW02]	qAG7-2, Angaji et al., 2010; qAG7.3, Septiningsih et al., 2013
LOC_Os07g46460	OS07G0658400	7	27723089	27738212	24126	3718.33	-2.69786	0.0277702	6518.38	5625.88	-0.212434	0.841633	3393.71	1219.92	-1.47608	0.182096	4566.47	2563.28	-0.833086	0.432612	8855.9	3736.84	-1.24482	0.267417	21463.1	4602.39	-2.22141	0.0449093	Ferredoxin-dependent glutamate synthase, chloroplastic [Source:UniProtKB/Swiss-Prot;Acc:Q69RJ0]	qAG7, Jiang et al., 2004; qAG7-2, Angaji et al., 2010
LOC_Os08g02690	OS08G0120500	8	1121680	1126438	1395.25	10607.1	2.92644	0.0155722	1972.24	2687.52	0.446445	0.685991	5797.68	9577.62	0.724192	0.51141	6227.84	16679.6	1.42128	0.186445	2043.54	3834.12	0.907824	0.411976	2017.02	13793.2	2.77366	0.0143328	Os08g0120500 protein; Putative MA3 domain-containing protein [Source:UniProtKB/TrEMBL;Acc:Q6YPF2]
LOC_Os08g07080	OS08G0167800	8	3961276	3965426	684.405	4.3055	-7.31253	0.0165499	7.81393	30.0228	1.94194	0.478969	0.978016	0	-10000000000	0.846369	0	1.17961	Inf	0.989769	7.50076	0	-10000000000	0.343837	86.7024	0	-10000000000	0.0152762	Putative sesquiterpene cyclase 1 [Source:UniProtKB/TrEMBL;Acc:Q6ZCP6]
LOC_Os08g14190	OS08G0240000	8	8472521	8475589	631.532	17.222	-5.19653	0.0124792	1.56279	0.968477	-0.69033	1	8.80214	2.95953	-1.57249	0.482152	32.0374	28.3105	-0.178417	0.942462	353.369	41.692	-3.08333	0.0989235	1731.19	93.6104	-4.20895	0.0243928	Os08g0240000 protein; Putative flavonol 3-sulfotransferase; cDNA clone:006-210-B05, full insert sequence; cDNA clone:J013124F24, full insert sequence [Source:UniProtKB/TrEMBL;Acc:Q6ZJP3]
LOC_Os08g26710	OS08G0355400	8	16235884	16247701	700.56	3.22912	-7.76122	0.0135702	0	0	NA	NA	0	0	NA	NA	5.72096	5.89803	0.0439758	1	0	1.54415	Inf	0.817659	61.9303	0	-10000000000	0.022995	Os08g0355400 protein; Putative uncharacterized protein B1104G07.4-1 [Source:UniProtKB/TrEMBL;Acc:Q6Z5Z2]
LOC_Os08g38720	OS08G0496000	8	24482382	24486043	302.548	2079.55	2.78104	0.0482205	687.626	772.844	0.168555	0.899476	934.005	1513.5	0.696388	0.587479	1133.89	2051.34	0.855277	0.488088	573.392	991.344	0.789864	0.536963	229.618	1906.11	3.05332	0.0215712	Os08g0496000 protein; Putative cytochrome c oxidase subunit 15(COX15) homolog isoform 1; cDNA clone:J033121L24, full insert sequence [Source:UniProtKB/TrEMBL;Acc:Q6Z5C5]	qAG8-1, Angaji et al., 2010
LOC_Os08g40180	OS08G0512700	8	25427055	25431499	500.82	3852.88	2.94357	0.0180291	1776.89	2655.56	0.579666	0.608274	5054.39	8851.94	0.808458	0.475059	6759.89	6584.56	-0.0379119	0.972263	1115.95	3713.68	1.73458	0.134884	377.298	3100.2	3.03858	0.0097806	3-hydroxy-3-methylglutaryl-coenzyme A reductase 3 [Source:UniProtKB/Swiss-Prot;Acc:Q9XHL5]
LOC_Os08g40420	OS08G0515700	8	25584990	25589000	9746.16	1294.88	-2.91202	0.0237149	3885.08	2411.51	-0.688011	0.543148	838.16	554.023	-0.597278	0.598586	636.171	1016.82	0.676579	0.542281	5222.2	1290.91	-2.01627	0.0893867	8028.07	1015.71	-2.98256	0.0121702	Os08g0515700 protein; Ternary complex factor-like [Source:UniProtKB/TrEMBL;Acc:Q7EZ88]
LOC_Os08g43400	OS08G0547500	8	27435126	27442438	14705.9	2526.25	-2.54132	0.0404809	5791.68	5176.51	-0.162003	0.879946	1485.61	777.763	-0.933648	0.400909	1371.89	2080.83	0.600995	0.576951	4206.26	1278.56	-1.71802	0.134898	12025.9	2217.9	-2.43888	0.0315765	Putative kinesin heavy chain [Source:UniProtKB/TrEMBL;Acc:Q6Z9D2]
LOC_Os09g19229	OS09G0356800	9	11483617	11506480	509.632	6.99643	-6.18669	0.0485479	0	0.968477	Inf	1	10.7582	0.591905	-4.18392	0.235272	6.86515	12.9757	0.918445	0.77409	10.8344	0	-10000000000	0.280105	43.8276	0	-10000000000	0.0416641	Os09g0356800 protein; Putative OsD305 [Source:UniProtKB/TrEMBL;Acc:Q5QL24]
LOC_Os09g25150	OS09G0419200	9	15076258	15079326	1621.42	114.096	-3.82894	0.0331518	393.822	463.9	0.236271	0.885087	95.8455	11.2462	-3.09127	0.0694634	102.977	47.1842	-1.12595	0.47358	195.02	32.4271	-2.58835	0.126448	1207.16	52.3334	-4.52775	0.00880227	Putative cinnamoyl CoA reductase [Source:UniProtKB/TrEMBL;Acc:Q6ERR3]
LOC_Os09g28520	OS09G0459200	9	17350940	17352413	27.9049	594.158	4.41226	0.0121109	53.1347	39.7075	-0.420241	0.79973	602.458	811.502	0.429735	0.777929	975.996	1271.62	0.381715	0.791067	142.515	409.199	1.5217	0.321912	12.3861	254.296	4.35972	0.00987902	Os09g0459200 protein; Putative uncharacterized protein B1045B05.30; Putative uncharacterized protein OSJNBa0054F02.8; cDNA clone:002-170-E12, full insert sequence [Source:UniProtKB/TrEMBL;Acc:Q67J23]
LOC_Os09g31080	OS09G0484200	9	18685679	18686832	2319.04	12602.2	2.44207	0.0420561	3355.3	6093.66	0.860866	0.434612	9479.91	18811.3	0.988658	0.371091	7116.88	18525.7	1.38021	0.199734	7084.06	30405.8	2.1017	0.0660508	1122.37	7454.19	2.73151	0.0159209	Os09g0484200 protein; cDNA clone:J033073G16, full insert sequence [Source:UniProtKB/TrEMBL;Acc:Q0J0T7]
LOC_Os09g31446	OS09G0491596	9	18944434	18945272	70.4966	798.131	3.501	0.0465765	110.958	339.935	1.61525	0.309914	249.394	523.836	1.07069	0.495451	348.979	921.272	1.40049	0.355961	249.192	257.873	0.0494017	0.970021	50.497	514.489	3.34887	0.0414704	Os09g0491596 protein; cDNA clone:002-116-H01, full insert sequence [Source:UniProtKB/TrEMBL;Acc:A3C058]
LOC_Os09g36470	OS09G0535200	9	21046293	21050027	5.87472	402.564	6.09855	0.045488	0	0	NA	NA	6.84611	3.55143	-0.946884	0.777045	6.86515	11.7961	0.780941	0.808956	11.6679	74.1191	2.66731	0.308719	2.85832	234.395	6.35763	0.0319866	Os09g0535200 protein; Putative uncharacterized protein P0569E11.4 [Source:UniProtKB/TrEMBL;Acc:Q69JZ8]
LOC_Os10g02260	OS10G0111700	10	806037	809751	411.23	21.5275	-4.25569	0.0152104	890.788	752.506	-0.243378	0.865761	117.362	19.5329	-2.58699	0.101803	82.3818	162.786	0.982575	0.504696	880.09	172.945	-2.34734	0.132773	1666.4	188.695	-3.14261	0.0424507	POT family protein, expressed [Source:UniProtKB/TrEMBL;Acc:Q33BF9]
LOC_Os10g03540	OS10G0124000	10	1530563	1532176	96.9328	946.671	3.28781	0.0405816	198.474	337.03	0.763928	0.599253	920.313	519.101	-0.82611	0.559447	1517.2	435.275	-1.80141	0.201766	362.537	424.641	0.228115	0.868898	63.8358	658.958	3.36775	0.0260349	NHP2-like protein 1, putative, expressed; Os10g0124000 protein; Putative ribosomal protein L7Ae-like; cDNA clone:J033109K13, full insert sequence [Source:UniProtKB/TrEMBL;Acc:Q7G608]
LOC_Os10g08474	OS10G0166600	10	4599943	4602849	95.4641	0.538187	-7.47071	0.0280999	7.81393	0.968477	-3.01226	0.425149	2.93405	0.591905	-2.30945	0.620685	5.72096	1.17961	-2.27795	0.578316	473.382	23.1622	-4.35316	0.105092	180.074	2.94836	-5.93254	0.0383864	Cytochrome P450 family protein, expressed; Os10g0166600 protein [Source:UniProtKB/TrEMBL;Acc:Q10A27]
LOC_Os10g20650	OS10G0347000	10	10427700	10431861	60.2158	601.155	3.31952	0.0372605	329.748	665.344	1.01274	0.476367	559.425	725.676	0.37538	0.794064	1129.32	682.992	-0.725511	0.594025	620.897	603.762	-0.0403727	0.987476	15.2444	966.325	5.98616	0.000399723	Expressed protein; Os10g0347000 protein; cDNA clone:J033046G12, full insert sequence [Source:UniProtKB/TrEMBL;Acc:Q7G3M2]
LOC_Os10g35030	OS10G0492300	10	18687994	18693376	8196.7	1122.66	-2.86812	0.0259296	1662.8	2011.53	0.274673	0.813319	1497.34	546.92	-1.453	0.209017	2450.86	1130.06	-1.11689	0.316943	3576.2	835.385	-2.09791	0.0783329	10905.4	1384.99	-2.9771	0.0124116	Os10g0492300 protein [Source:UniProtKB/TrEMBL;Acc:Q0IWS0]
LOC_Os10g39920	OS10G0546400	10	21360059	21360924	33.7796	775.527	4.52095	0.00848804	185.971	108.469	-0.777793	0.59876	900.753	2091.2	1.21513	0.409833	955.401	331.469	-1.52723	0.287349	79.1747	115.811	0.548662	0.716064	18.1027	181.324	3.32429	0.0352806	Cyclin-dependent protein kinase inhibitor SMR1 [Source:UniProtKB/Swiss-Prot;Acc:Q9AV28]
LOC_Os11g03290	OS11G0126800	11	1225190	1226553	138.056	1.07637	-7.00293	0.0342362	309.432	24.2119	-3.67583	0.167444	13.6922	0	-10000000000	0.0964934	14.8745	0	-10000000000	0.152865	17.5018	0	-10000000000	0.180858	165.783	0.73709	-7.81324	0.0201186	Os11g0126800 protein [Source:UniProtKB/TrEMBL;Acc:Q0IUZ4]
LOC_Os11g10320	OS11G0209000	11	5605253	5607081	255.55	0	-10000000000	0.00781819	6.25114	2.90543	-1.10537	0.806484	26.4064	0	-10000000000	0.0567022	40.0467	1.17961	-5.08531	0.125601	0	0	NA	NA	281.068	0	-10000000000	0.00735254	Os11g0209000 protein [Source:UniProtKB/TrEMBL;Acc:Q0ITX7]
LOC_Os11g24060	OS11G0427700	11	13661556	13663478	2.93736	277.704	6.56289	0.0270388	6.25114	5.81086	-0.105368	1	105.626	311.934	1.56228	0.492794	78.9493	166.324	1.075	0.623362	20.002	49.4128	1.30474	0.584033	0	36.8545	Inf	0.0373138	At5g50300; Os11g0427700 protein; Xanthine/uracil/vitamin C permease family protein, putative, expressed; cDNA clone:J023111J10, full insert sequence [Source:UniProtKB/TrEMBL;Acc:Q53MW1]
LOC_Os11g26340	OS11G0449600	11	15075242	15075772	1276.28	3.76731	-8.4042	0.000341917	711.067	72.6358	-3.29123	0.0725867	14.6702	0.591905	-4.63138	0.0648497	27.4606	2.35921	-3.54099	0.10695	0.833418	0	-10000000000	1	840.346	0.73709	-10.1549	8.17e-05	Expressed protein; Os11g0449600 protein; cDNA clone:J013030G07, full insert sequence [Source:UniProtKB/TrEMBL;Acc:Q53JD9]
DE genes in IR64, F291
LOC_Os03g04060	OS03G0132900	3	1860429	1861772	52.8725	88.8009	0.748057	0.728516	15.6279	240.182	3.94194	0.040537	2302.25	15.3895	-7.22495	0.000715973	24.028	220.586	3.19855	0.0764775	16.6684	7.72074	-1.1103	0.631733	34.2998	28.0094	-0.29229	0.880149	Chitinase 11 [Source:UniProtKB/Swiss-Prot;Acc:Q10S66]
LOC_Os12g02330	OS12G0115300	12	746162	747120	3034.29	1403.59	-1.11224	0.430591	57.8231	405.792	2.81102	0.049716	98.7796	11.8381	-3.06078	0.0381456	78.9493	240.64	1.60788	0.23178	630.064	242.431	-1.37792	0.322125	1772.16	1170.5	-0.598384	0.646533	Non-specific lipid-transfer protein [Source:UniProtKB/TrEMBL;Acc:Q2QYL0]
LOC_Os12g43440	OS12G0630100	12	26956203	26956894	17.6242	15.6074	-0.175321	0.946455	393.822	4.84238	-6.34568	0.0310977	223.966	2.36762	-6.5637	0.0281011	19.4513	2.35921	-3.04349	0.30711	0.833418	6.1766	2.8897	0.477081	47.6387	15.4789	-1.62183	0.512559	Os12g0630100 protein; Thaumatin-like protein, putative, expressed; cDNA clone:J023009L15, full insert sequence [Source:UniProtKB/TrEMBL;Acc:Q2QLS8]
DE genes in IR64, F274-2a
LOC_Os01g52250	OS01G0720600	1	30032428	30041425	76995.5	64261.1	-0.260828	0.822708	7710.78	78655.8	3.3506	0.0141472	6739.51	27277.9	2.01702	0.123703	6319.37	94912.3	3.90874	0.00446097	18091.8	55892	1.6273	0.214474	24835.9	143330	2.52884	0.0527768	Glycogen (Starch) synthase-like [Source:UniProtKB/TrEMBL;Acc:Q5JMA0]	qAG1-2, Angaji et al., 2010
LOC_Os01g65690	OS01G0878900	1	38144793	38146141	15701.6	13711.4	-0.195541	0.843996	62.5114	5011.87	6.32508	2.82e-06	562.359	1929.02	1.7783	0.11379	136.159	10341.6	6.24703	2.44e-06	2451.92	4593.84	0.905792	0.414704	5447	6760.59	0.311685	0.771604	Os01g0878900 protein; Putative 4,5-DOPA dioxygenase extradiol; cDNA clone:006-201-A03, full insert sequence; cDNA clone:006-208-A08, full insert sequence; cDNA clone:006-301-C01, full insert sequence; cDNA clone:006-305-C02, full insert sequence; cDNA clone:006-308-G05, full insert sequence; cDNA clone:006-311-C01, full insert sequence [Source:UniProtKB/TrEMBL;Acc:Q8L3U9]	qAG1-2, Angaji et al., 2010
LOC_Os01g68740	OS01G0916100	1	39926253	39927260	118.963	371.349	1.64226	0.442671	20.3162	456.153	4.48881	0.034514	9.78016	76.3558	2.96481	0.150944	3.43258	333.829	6.60367	0.00529627	36.6704	94.1931	1.361	0.487031	103.852	505.644	2.28359	0.227633	Os01g0916100 protein [Source:UniProtKB/TrEMBL;Acc:Q0JGM3]	qAG1-2, Angaji et al., 2010
LOC_Os03g08470	OS03G0183000	3	4348736	4350531	3413.21	6770.39	0.98811	0.440318	520.408	2919.96	2.48823	0.0379936	2031.34	1249.51	-0.701066	0.540351	617.864	5467.47	3.14551	0.00892542	1616.83	2680.64	0.729409	0.528439	1432.97	3235.09	1.1748	0.30077	AP2 domain containing protein; AP2 domain containing protein, expressed; Os03g0183000 protein; Putative AP2 domain containing protein; cDNA clone:001-020-F02, full insert sequence; cDNA clone:J033075D23, full insert sequence [Source:UniProtKB/TrEMBL;Acc:Q10QU5]
LOC_Os04g39320	OS04G0468600	4	23408498	23410250	98.4015	599.002	2.60581	0.180963	29.6929	454.216	3.93519	0.0407654	155.505	134.362	-0.210826	0.901876	14.8745	766.744	5.68783	0.00525882	15.0015	120.444	3.00518	0.115625	85.7496	360.437	2.07154	0.23657	cDNA clone:006-303-A07, full insert sequence [Source:UniProtKB/TrEMBL;Acc:B7E663]
LOC_Os07g05360	OS07G0147500	7	2454338	2455636	15397.6	4056.32	-1.92447	0.117691	779.83	3787.71	2.2801	0.049446	415.657	859.446	1.04801	0.356756	318.085	4224.17	3.73118	0.00195169	1388.47	4999.95	1.84841	0.111785	3629.11	5138.25	0.501661	0.647341	Os07g0147500 protein; Putative photosystem II 10 kD polypeptide; cDNA clone:001-046-C07, full insert sequence [Source:UniProtKB/TrEMBL;Acc:Q8H4P7]
LOC_Os08g10310	OS08G0203400	8	6015745	6023225	1731.57	222.809	-2.9582	0.108097	51.5719	705.051	3.77307	0.0355415	9.78016	1.77572	-2.46146	0.25885	8.00935	185.198	4.53124	0.016429	142.515	182.21	0.35449	0.828653	52.4025	234.395	2.16123	0.195508	Os08g0203400 protein; Putative Receptor-like serine/threonine kinase(RFK1); cDNA clone:J013162L02, full insert sequence [Source:UniProtKB/TrEMBL;Acc:Q6ZKW7]
LOC_Os08g14109	OS08G0239300	8	8437323	8445916	199.74	988.111	2.30655	0.235097	0	40.676	Inf	0.0230415	13.6922	30.1872	1.14058	0.554662	27.4606	383.372	3.80331	0.0426616	63.3398	287.212	2.18093	0.231681	100.994	676.648	2.74414	0.124859	Os08g0239300 protein; cDNA clone:006-203-B07, full insert sequence [Source:UniProtKB/TrEMBL;Acc:Q0J722]
LOC_Os10g07556	OS10G0162844	10	4080175	4081731	105.745	11.8401	-3.15883	0.10445	131.274	1871.1	3.83323	0.035147	8.80214	7.10286	-0.309454	0.924244	2.28838	163.965	6.16292	0.00459875	7.50076	7.72074	0.0417022	1	108.616	834.386	2.94148	0.0897099
LOC_Os11g08569	OS11G0189600	11	4522342	4557911	4163.71	1077.99	-1.94953	0.150216	442.268	3167.89	2.84053	0.0291875	564.315	210.718	-1.42119	0.257258	306.644	2031.28	2.72776	0.0318604	230.023	194.563	-0.241545	0.861517	1786.45	1939.28	0.118428	0.92264	Parkeol synthase [Source:UniProtKB/Swiss-Prot;Acc:H2KWF1]
LOC_Os11g44680	OS11G0669100	11	27015358	27021340	85.1834	253.486	1.57326	0.462066	1.56279	59.0771	5.24041	0.0431893	649.402	139.098	-2.22301	0.243785	18.3071	714.841	5.28715	0.0131365	2.50025	18.5298	2.8897	0.225645	36.2054	211.545	2.54669	0.183451	Expressed protein; Os11g0669100 protein [Source:UniProtKB/TrEMBL;Acc:Q2QZV8]	qAG11, Baltazar et al., 2014
LOC_Os11g47809	OS11G0704500	11	28827746	28828439	3692.26	9354.23	1.34111	0.286795	500.091	3257.96	2.7037	0.0244855	421.525	1138.23	1.43311	0.218982	568.664	7167.29	3.65578	0.00282026	606.729	2668.29	2.13679	0.0744558	1863.62	2601.19	0.48106	0.667717	Metallothionein-like protein 1A [Source:UniProtKB/Swiss-Prot;Acc:P0C5B3]
LOC_Os12g18410	OS12G0282000	12	10651961	10653342	274.643	1091.44	1.99061	0.182312	31.2557	1245.46	5.31642	0.000847177	11.7362	2.95953	-1.98753	0.255983	90.3912	756.128	3.06438	0.0299257	70.0071	172.945	1.30474	0.353572	2746.85	2210.53	-0.313382	0.810853	Expressed protein; Os12g0282000 protein [Source:UniProtKB/TrEMBL;Acc:Q2QTV2]
DE genes in IR64, 8391
LOC_Os04g54240	OS04G0635100	4	32301933	32302446	798.961	413.866	-0.948963	0.508902	90.6416	798.993	3.13994	0.033282	48.9008	285.89	2.54753	0.0801144	67.5073	293.722	2.12133	0.129592	135.014	3445	4.67332	0.00298147	607.869	757.728	0.317919	0.813993	OSJNBa0043L09.19 protein; Os04g0635100 protein [Source:UniProtKB/TrEMBL;Acc:Q7XQS8]
LOC_Os07g39350	OS07G0582400	7	23582270	23584330	910.581	3310.93	1.86238	0.150012	118.772	1494.36	3.65326	0.00464895	1796.61	4629.29	1.36551	0.253752	1247.17	5450.96	2.12785	0.0725208	175.851	2385.71	3.76199	0.00401015	1407.25	1443.22	0.0364183	0.975941	Putative sorbitol transporter [Source:UniProtKB/TrEMBL;Acc:Q6ZFM7]	qAG7-2, Angaji et al., 2010; qAG7.3, Septiningsih et al., 2013
LOC_Os11g30760	OS11G0502700	11	17911046	17912013	49.9351	428.397	3.10082	0.082468	17.1906	204.349	3.57134	0.0429606	1608.84	954.743	-0.752833	0.628249	110.987	290.183	1.38658	0.372728	27.5028	305.741	3.47466	0.0452633	55.2608	95.0846	0.782954	0.622074	Expressed protein [Source:UniProtKB/TrEMBL;Acc:H2KWG7]
DE genes in IR64, 8753
LOC_Os01g12570	OS01G0225500	1	6912812	6915127	26.4362	0.538187	-5.61826	0.144785	98.4555	0	-10000000000	0.0371464	19.5603	0.591905	-5.04642	0.166439	9.15354	0	-10000000000	0.270401	25.0025	0	-10000000000	0.165784	256.296	0.73709	-8.44175	0.0235066	Putative 3-methyl-2-oxobutanoate hydroxymethyltransferase [Source:UniProtKB/TrEMBL;Acc:Q9AWZ7]
LOC_Os02g13660	OS02G0230300	2	7323916	7324292	1361.47	2787.27	1.03369	0.397371	170.344	1936.95	3.50727	0.00339371	5166.86	4397.86	-0.232487	0.828656	1487.45	4312.64	1.53573	0.158014	4726.32	19476.3	2.04294	0.0751112	917.521	14869.3	4.01845	0.000831844	Proline-and threonine-rich protein [Source:UniProtKB/TrEMBL;Acc:Q56UU6]
LOC_Os03g19420	OS03G0307200	3	10926469	10927729	724.059	2581.14	1.83383	0.136504	284.427	2911.24	3.3555	0.00558233	105.626	20.7167	-2.3501	0.0524478	385.593	316.134	-0.28654	0.79648	120.846	151.327	0.3245	0.781395	34021.6	1551.57	-4.45465	0.00036912	Nicotianamine synthase 2 [Source:UniProtKB/Swiss-Prot;Acc:Q10MI9]
LOC_Os03g19427	OS03G0307300	3	10929507	10930895	521.381	1319.63	1.33973	0.389363	350.064	2727.23	2.96175	0.0440683	164.307	21.9005	-2.90736	0.0525799	659.055	362.139	-0.863854	0.52469	96.6765	162.136	0.745964	0.602685	839.393	12.5305	-6.06583	0.000314604	Nicotianamine synthase 1 [Source:UniProtKB/Swiss-Prot;Acc:Q0DSH9]
LOC_Os06g31890	OS06G0513050	6	18524688	18525556	0	10.2256	Inf	0.231162	62.5114	0	-10000000000	0.0138138	1234.26	85.2343	-3.85606	0.0786489	102.977	5.89803	-4.12595	0.0735124	0	0	NA	NA	0.952773	70.0235	6.19956	0.0245487
LOC_Os12g31860	OS12G0503000	12	19180665	19185915	232.051	28.5239	-3.0242	0.0555229	1058.01	98.7846	-3.42092	0.0212279	139.856	454.583	1.7006	0.228439	189.936	60.1599	-1.65864	0.232594	274.195	824.575	1.58845	0.2619	3883.5	519.648	-2.90175	0.0418571	Ureide permease 4, putative, expressed; cDNA clone:002-105-A09, full insert sequence [Source:UniProtKB/TrEMBL;Acc:Q2QQ87]
DE genes in F291, F274-2a
LOC_Os01g13210	OS01G0233000	1	7363663	7366111	7808.97	5395.32	-0.533422	0.634179	2395.75	3958.16	0.724354	0.51468	643.534	4399.63	2.77329	0.0171496	446.235	6353.36	3.83164	0.00130602	3031.14	9907.26	1.70862	0.134162	6371.19	7112.92	0.158877	0.883373	Salt stress root protein RS1 [Source:UniProtKB/Swiss-Prot;Acc:Q0JPA6]
LOC_Os01g19630	OS01G0302100	1	11129520	11131876	218.833	138.852	-0.656281	0.716696	443.831	183.042	-1.27784	0.484236	302.207	10.0624	-4.90849	0.019135	347.834	10.6165	-5.03403	0.0164312	416.709	27.7947	-3.90616	0.0552972	232.477	28.0094	-3.0531	0.1097	cDNA clone:J023126J21, full insert sequence [Source:UniProtKB/TrEMBL;Acc:B7ER10]	qAG1-1, Angaji et al., 2010
LOC_Os01g20980	OS01G0311800	1	11715268	11717784	19.0928	205.049	3.42487	0.0987802	6.25114	14.5272	1.21656	0.61829	55.7469	1989.99	5.15772	0.011445	3.43258	121.499	5.14551	0.017909	10.001	108.09	3.43402	0.0861347	13.3388	35.3803	1.40731	0.457081	Pectin methylesterase PME1-like protein [Source:UniProtKB/TrEMBL;Acc:Q655Q3]
LOC_Os01g58140	OS01G0793900	1	33625287	33626043	230.583	413.328	0.842002	0.637659	34.3813	99.7531	1.53674	0.343712	59.659	1083.78	4.18319	0.0134436	73.2283	913.015	3.64017	0.0251545	53.3388	193.019	1.85548	0.246388	809.857	763.625	-0.0848034	0.954411	Os01g0793900 protein; Putative uncharacterized protein P0684C02.12; Uncharacterized protein; cDNA clone:001-107-E01, full insert sequence [Source:UniProtKB/TrEMBL;Acc:Q8S1K8]	qAG1-2, Angaji et al., 2010
LOC_Os01g59840	OS01G0813800	1	34605594	34611055	1982.72	1300.8	-0.608082	0.635018	631.365	1315.19	1.05873	0.407539	105.626	1343.03	3.66846	0.00787563	106.41	1817.77	4.09447	0.00305203	304.198	1033.04	1.76381	0.178184	1237.65	2319.62	0.906283	0.465372	Os1bglu3 - beta-glucosidase homologue, similar to G. max isohydroxyurate hydrolase, expressed	qAG1-2, Angaji et al., 2010
LOC_Os01g68680	OS01G0915300	1	39878610	39881467	878.27	572.631	-0.617059	0.640185	384.445	546.221	0.506706	0.702777	231.79	1683.97	2.86098	0.0374121	156.754	1098.21	2.80858	0.0367526	246.692	1235.32	2.3241	0.0896572	1305.3	2660.89	1.02753	0.421818	tetratricopeptide repeat domain containing protein, expressed	qAG1-2, Angaji et al., 2010
LOC_Os01g70220	OS01G0927000	1	40654238	40664395	154.211	387.495	1.32927	0.421164	534.473	734.105	0.457871	0.758119	898.796	89.3777	-3.33001	0.0336013	1335.27	146.271	-3.19042	0.0364273	599.228	361.331	-0.729784	0.631963	150.538	339.798	1.17455	0.416928	Os01g0927000 protein; Putative SET domain-containing protein [Source:UniProtKB/TrEMBL;Acc:Q5JK06]
LOC_Os02g07490	OS02G0171100	2	3868115	3872945	1135.29	1123.73	-0.0147585	0.964579	2367.62	2060.92	-0.20015	0.865394	2693.46	418.477	-2.68624	0.0354564	3643.11	365.678	-3.31652	0.00959115	2063.54	713.397	-1.53235	0.223273	1194.78	673.7	-0.826564	0.488203	Os02g0171100 protein; Putative glyceraldehyde-3-phosphate dehydrogenase; cDNA clone:J023036H06, full insert sequence [Source:UniProtKB/TrEMBL;Acc:Q6H703]	qAG2.1, Baltazar et al., 2014
LOC_Os03g01800	OS03G0108300	3	492815	494095	3123.88	516.66	-2.59605	0.090001	795.458	657.596	-0.274585	0.838213	963.346	14.7976	-6.02462	0.000294031	326.095	31.8494	-3.35595	0.0226736	763.411	196.107	-1.96082	0.172335	371.582	111.301	-1.73922	0.20682	Glycosyl hydrolases family 16 protein, expressed; Os03g0108300 protein; cDNA clone:006-207-G12, full insert sequence [Source:UniProtKB/TrEMBL;Acc:Q10SX3]
LOC_Os03g22170	OS03G0341000	3	12713329	12714583	36.717	367.582	3.32355	0.168761	7.81393	125.902	4.01011	0.0983652	1.95603	314.894	7.33079	0.00828073	2.28838	297.261	7.02126	0.0098748	3.33367	60.2218	4.1751	0.0966831	15.2444	122.357	3.00475	0.176563	AP2 domain containing protein, expressed; Os03g0341000 protein; cDNA clone:002-182-G01, full insert sequence [Source:UniProtKB/TrEMBL;Acc:Q10LN8]
LOC_Os03g31510	OS03G0429000	3	17949269	17950045	368.638	2194.19	2.57341	0.0548158	384.445	592.708	0.624543	0.612623	1073.86	6173.57	2.5233	0.046092	271.174	3969.37	3.87162	0.00311063	527.554	1561.13	1.5652	0.210103	373.487	1333.4	1.83597	0.13182	Cysteine proteinase inhibitor 8 [Source:UniProtKB/Swiss-Prot;Acc:Q10J94]	qAG3, Baltazar et al., 2014
LOC_Os04g45000	OS04G0532400	4	26617453	26619087	396.543	252.948	-0.648639	0.647895	1087.7	864.85	-0.330758	0.809026	860.654	61.5581	-3.80541	0.0129839	1541.23	148.63	-3.37428	0.0219403	1288.46	182.21	-2.82198	0.0584938	252.485	190.906	-0.403333	0.769925	OSJNBa0081C01.25 protein; OSJNBb0039L24.6 protein [Source:UniProtKB/TrEMBL;Acc:Q7X7F0]
LOC_Os04g51340	OS04G0602500	4	30405474	30409351	1007.51	2665.64	1.40368	0.265396	2361.37	1157.33	-1.02882	0.369701	666.029	11635.7	4.12683	0.0011544	521.752	4829.31	3.21038	0.00753812	1359.31	2716.16	0.998698	0.389808	1863.62	2867.28	0.621571	0.579527	Os04g0602500 protein; cDNA clone:J033076C10, full insert sequence [Source:UniProtKB/TrEMBL;Acc:Q0JAF0]
LOC_Os05g02300	OS05G0113900	5	738208	739079	1608.2	2154.36	0.421811	0.749321	4727.43	5116.46	0.114092	0.922075	10480.4	1190.32	-3.13827	0.00845149	11646.7	1479.23	-2.97701	0.0101311	6112.29	1771.14	-1.78704	0.122211	717.438	1820.61	1.3435	0.224576	Probable histone H2A.6 [Source:UniProtKB/Swiss-Prot;Acc:Q75L11]
LOC_Os05g09440	OS05G0186300	5	5293558	5297417	822.46	1590.34	0.951319	0.518328	231.292	76.5097	-1.596	0.234985	329.591	3911.31	3.5689	0.0113495	90.3912	1060.47	3.55237	0.0106567	59.1727	328.904	2.47466	0.0755177	1401.53	1054.04	-0.411075	0.745912	Malic enzyme [Source:UniProtKB/TrEMBL;Acc:Q6T5D1]	qAG5, Jiang et al., 2006
LOC_Os05g10670	OS05G0195200	5	5846703	5848186	556.629	343.363	-0.696981	0.591683	795.458	420.319	-0.920301	0.465962	4435.3	736.922	-2.58945	0.0494448	4575.62	364.498	-3.64998	0.00666114	662.568	140.518	-2.23732	0.0931778	637.405	167.319	-1.92961	0.129125	Zinc finger CCCH domain-containing protein 35 [Source:UniProtKB/Swiss-Prot;Acc:Q6L4N4]	qAG5, Jiang et al., 2006
LOC_Os05g47780	OS05G0551000	5	27377539	27382166	835.678	1588.73	0.926852	0.494938	631.365	1481.77	1.23077	0.314129	516.392	2896.78	2.48791	0.0481779	457.677	3102.36	2.76097	0.0262947	618.396	1965.7	1.66844	0.180564	1947.47	3553.51	0.867645	0.46397	Os05g0551000 protein; Putative uncharacterized protein OSJNBa0079H23.4; cDNA clone:J013131L14, full insert sequence [Source:UniProtKB/TrEMBL;Acc:Q6AUD8]
LOC_Os06g06460	OS06G0159450	6	3040365	3041231	1072.14	1227.6	0.195358	0.902117	3611.6	3786.74	0.0683209	0.956642	6106.73	937.578	-2.70339	0.0257448	6485.28	1028.62	-2.65646	0.0245535	3710.38	1575.03	-1.23619	0.297996	490.678	1014.97	1.04859	0.357087
LOC_Os06g06510	OS06G0160100	6	3055907	3057961	1108.85	1495.08	0.431158	0.750484	3578.78	4356.21	0.283606	0.806805	6772.76	1244.78	-2.44386	0.0399036	7282.78	1426.14	-2.35237	0.0418782	4311.27	1559.59	-1.46695	0.213048	511.639	1441.75	1.49462	0.188528	Histone H3.2 [Source:UniProtKB/Swiss-Prot;Acc:Q2RAD9]
LOC_Os06g07000	OS06G0166000	6	3319112	3322249	1207.25	574.246	-1.07199	0.465681	414.138	695.366	0.747661	0.597805	95.8455	738.106	2.94504	0.0473748	100.689	741.972	2.88146	0.0468812	394.207	693.323	0.814574	0.563284	665.036	751.832	0.176978	0.898118	F-box family protein-like; Os06g0166000 protein [Source:UniProtKB/TrEMBL;Acc:Q5VRR5]	qAG6, Septiningsih et al., 2013
LOC_Os06g20900	OS06G0314501	6	12076313	12079453	22.0302	8.61099	-1.35523	0.616556	9.37671	122.028	3.70199	0.157904	512.48	7.69477	-6.05748	0.0280675	4.57677	188.737	5.3659	0.0499984	1.66684	1.54415	-0.110301	1	6.66941	2.94836	-1.17765	0.714621	Os06g0314501 protein; cDNA, clone: J065076J12, full insert sequence [Source:UniProtKB/TrEMBL;Acc:B7F8K3]
LOC_Os06g28970	OS06G0484600	6	16509328	16512799	768.119	317.53	-1.27444	0.397715	722.007	455.184	-0.665563	0.635959	879.236	63.9258	-3.78178	0.0147102	996.591	117.961	-3.0787	0.037038	865.922	273.314	-1.66368	0.258666	902.276	280.094	-1.68766	0.23174	BolA-like; cDNA clone:001-108-C06, full insert sequence [Source:UniProtKB/TrEMBL;Acc:Q67VQ4]
LOC_Os06g35540	OS06G0548000	6	20727293	20731768	984.015	1329.86	0.434522	0.776727	445.394	553.969	0.314723	0.809178	388.272	2488.37	2.68006	0.0432747	247.146	2426.45	3.29541	0.013223	325.033	1193.63	1.87669	0.152905	1329.12	1829.46	0.460945	0.709395	Aspartate aminotransferase [Source:UniProtKB/TrEMBL;Acc:Q0DBN4]
LOC_Os06g41010	OS06G0612800	6	24491993	24493907	8945.73	11854.1	0.406117	0.758017	9226.69	14668.5	0.668842	0.54988	5093.51	26256.3	2.36593	0.0405506	6603.13	32272.8	2.2891	0.0417442	5837.26	15257.7	1.38618	0.223543	15277.7	27216.3	0.833042	0.445305	Zinc finger A20 and AN1 domain-containing stress-associated protein 8 [Source:UniProtKB/Swiss-Prot;Acc:A3BDI8]
LOC_Os06g42000	OS06G0625500	6	25214052	25215245	710.841	871.325	0.293684	0.860395	1562.79	937.486	-0.737251	0.562199	2104.69	234.394	-3.1666	0.0205975	2710.59	456.508	-2.5699	0.0490798	1447.65	291.844	-2.31044	0.0863905	571.664	467.315	-0.290772	0.816617	Peroxiredoxin-2E-1, chloroplastic [Source:UniProtKB/Swiss-Prot;Acc:Q69TY4]
LOC_Os07g35310	OS07G0537500	7	21133305	21140628	1100.04	1241.06	0.174015	0.92809	443.831	620.794	0.484103	0.709112	220.054	2027.87	3.20404	0.0185964	281.471	2406.4	3.09581	0.0197111	319.199	1417.53	2.15085	0.106392	496.395	2283.5	2.20169	0.0879797	Os07g0537500 protein [Source:UniProtKB/TrEMBL;Acc:Q0D5T4]
LOC_Os08g10510	OS08G0205900	8	6170105	6175794	1070.67	201.82	-2.40737	0.095777	1497.15	853.228	-0.811214	0.529829	1483.65	76.9477	-4.26913	0.00326668	1931.4	100.267	-4.26773	0.00280223	1557.66	328.904	-2.24364	0.0996446	1799.79	350.118	-2.36192	0.0739767	Probable gamma-aminobutyrate transaminase 3, mitochondrial [Source:UniProtKB/Swiss-Prot;Acc:Q6ZCF0]
LOC_Os08g20410	OS08G0299300	8	12256992	12258654	92.5268	48.4368	-0.933767	0.663783	178.158	119.123	-0.580706	0.778571	137.9	4.73524	-4.86404	0.0425571	332.96	10.6165	-4.97097	0.0347617	321.699	60.2218	-2.41736	0.271225	80.033	66.3381	-0.270757	0.898662	Os08g0299300 protein [Source:UniProtKB/TrEMBL;Acc:Q0J6L5]
LOC_Os08g28560	OS08G0372900	8	17439595	17443724	1.46868	50.5896	5.10625	0.104644	4.68836	25.1804	2.42515	0.366717	7.82413	762.966	6.60754	0.0136965	0	154.528	Inf	0.00805287	1.66684	54.0452	5.01898	0.0717098	4.76387	78.8686	4.04925	0.103299	Os08g0372900 protein; Putative uncharacterized protein P0690C12.12; cDNA clone:J033112H01, full insert sequence [Source:UniProtKB/TrEMBL;Acc:Q6ZD18]
LOC_Os08g34210	OS08G0440800	8	21445787	21450773	11846.4	6457.17	-0.875471	0.453365	1233.04	2596.49	1.07434	0.339177	781.435	5724.31	2.87291	0.0146213	1052.66	7326.53	2.7991	0.0147865	1255.96	1289.36	0.0378678	0.966831	5523.23	4812.46	-0.198737	0.854272	Glyceraldehyde-3-phosphate dehydrogenase; Os08g0440800 protein; cDNA clone:J023100G04, full insert sequence [Source:UniProtKB/TrEMBL;Acc:Q6Z9G0]
LOC_Os08g40010	OS08G0510900	8	25341100	25343949	29.3736	54.3569	0.887943	0.738178	120.334	232.434	0.949774	0.645991	274.822	8.87858	-4.95203	0.0326712	472.551	18.8737	-4.64602	0.0387884	224.19	60.2218	-1.89636	0.37494	16.1971	76.6573	2.24268	0.286018	Os08g0510900 protein; Putative uncharacterized protein OSJNBa0016N23.127 [Source:UniProtKB/TrEMBL;Acc:Q7EXY7]
LOC_Os09g14100	OS09G0311600	9	8348957	8354350	27.9049	263.173	3.23742	0.197803	4.68836	142.366	4.92438	0.0614318	0.978016	423.804	8.75932	0.00464068	2.28838	311.416	7.08837	0.0116709	0	1.54415	Inf	0.806706	0	0	NA	NA	Os09g0311600 protein [Source:UniProtKB/TrEMBL;Acc:Q0J2R4]
LOC_Os09g27060	OS09G0442700	9	16461644	16467575	352.483	581.78	0.72292	0.634469	1300.24	1344.25	0.0480217	0.975469	1419.1	205.391	-2.78853	0.0432526	2326.14	293.722	-2.98542	0.0279096	1312.63	667.072	-0.976549	0.470468	290.596	493.85	0.765059	0.553085	Chromatin remodeling factor DDM1a [Source:UniProtKB/TrEMBL;Acc:Q05KP6]
LOC_Os09g36600	OS09G0536700	9	21110946	21114330	1537.71	4102.06	1.41557	0.272373	540.724	1424.63	1.39762	0.240302	548.667	3869.88	2.81828	0.0225368	433.649	3880.9	3.16179	0.00994601	518.386	1644.52	1.66557	0.16882	2340.96	5220.07	1.15697	0.316624	cDNA clone:J023012O05, full insert sequence [Source:UniProtKB/TrEMBL;Acc:B7EKL1]
LOC_Os09g37080	OS09G0542900	9	21386018	21387018	326.047	847.106	1.37746	0.408577	20.3162	23.2434	0.194192	0.950473	115.406	1443.66	3.64494	0.0235366	32.0374	1403.73	5.45337	0.00155856	40.8375	112.723	1.46481	0.349216	389.684	563.874	0.533066	0.714068	Os09g0542900 protein; Putative uncharacterized protein P0478E02.19; cDNA clone:J033044N08, full insert sequence [Source:UniProtKB/TrEMBL;Acc:Q7XJ08]
LOC_Os10g02040	OS10G0109300	10	655625	658866	10321.9	9592.11	-0.105786	0.903256	1976.92	5800.21	1.55285	0.161556	678.743	7101.68	3.38722	0.00398904	536.626	11176.8	4.38044	0.000288182	4460.45	17246.6	1.95105	0.0857733	3440.46	8638.69	1.32821	0.219364	Class III peroxidase 125; Os10g0109300 protein; Peroxidase 53, putative, expressed; Putative peroxidase; cDNA clone:001-038-C06, full insert sequence; cDNA clone:006-308-B11, full insert sequence [Source:UniProtKB/TrEMBL;Acc:Q7XHB3]
LOC_Os11g25330	OS11G0440200	11	14428631	14430579	45.5291	22.0657	-1.04498	0.496578	4999.35	2365.02	-1.07989	0.422586	14.6702	0.591905	-4.63138	0.0274443	0	17.6941	Inf	0.0203613	7.50076	3.0883	-1.28023	0.63769	924.19	299.996	-1.62325	0.227215
LOC_Os11g29420	OS11G0484700	11	17081029	17081391	4.40604	294.926	6.06473	0.0581433	0	13.5587	Inf	0.224353	0.978016	143.833	7.20032	0.0339605	1.14419	182.839	7.3201	0.0292304	1.66684	1.54415	-0.110301	1	0.952773	0	-10000000000	0.919976	Protease inhibitor/seed storage/LTP family protein [Source:UniProtKB/TrEMBL;Acc:Q2R478]
LOC_Os11g35500	OS11G0559200	11	20802978	20806262	622.72	226.039	-1.46201	0.415221	73.4509	351.557	2.25891	0.197903	9.78016	169.285	4.11345	0.0318611	13.7303	303.159	4.46464	0.0184043	65.84	472.51	2.84331	0.113669	234.382	639.057	1.44708	0.38452	Leucine Rich Repeat family protein; Os11g0559200 protein [Source:UniProtKB/TrEMBL;Acc:Q2R2K5]	qAG11, Jiang et al., 2006
LOC_Os11g35930	OS11G0566800	11	21102794	21104582	449.416	72.6552	-2.62891	0.13766	26.5674	263.426	3.30967	0.0563656	20.5383	266.357	3.69697	0.0344086	25.1722	2158.68	6.42217	0.00078037	43.3378	12.3532	-1.81074	0.325158	379.204	338.324	-0.164567	0.915708	Chalcone and stilbene synthases, N-terminal domain containing protein, expressed; Os11g0566800 protein; cDNA clone:006-208-A07, full insert sequence [Source:UniProtKB/TrEMBL;Acc:Q2R2G0]	qAG11, Jiang et al., 2006
LOC_Os12g10870	OS12G0211500	12	5856248	5859276	2.93736	90.9536	4.95254	0.096125	68.7626	295.385	2.1029	0.370094	3.91206	321.996	6.36297	0.0231393	1.14419	132.116	6.85133	0.0249967	7.50076	4.63245	-0.695263	0.894308	19.0555	36.8545	0.951635	0.687943	Os12g0211500 protein [Source:UniProtKB/TrEMBL;Acc:Q0IPE2]
DE genes in F291, 8391
LOC_Os01g07910	OS01G0174300	1	3820177	3824512	917.925	995.108	0.116477	0.962425	1340.87	927.801	-0.531282	0.67568	1740.87	268.133	-2.69879	0.0453521	1833	497.794	-1.88058	0.141518	1449.31	162.136	-3.1601	0.0228252	1341.5	646.428	-1.05329	0.403933	FAD/NAD(P)-binding oxidoreductase [Source:Projected from Arabidopsis thaliana (AT5G20080) TAIR;Acc:AT5G20080]
LOC_Os01g19610	OS01G0301900	1	11110199	11110480	129.244	61.3533	-1.07488	0.667341	117.209	57.1401	-1.03651	0.67252	45.9667	0	-10000000000	0.0278378	57.2096	4.71842	-3.59988	0.187188	125.013	0	-10000000000	0.0273472	139.105	7.3709	-4.23819	0.112589	Os01g0301900 protein; P0035H10.3 protein; Putative uncharacterized protein B1146F03.1; Uncharacterized protein [Source:UniProtKB/TrEMBL;Acc:Q9FP37]	qAG1-1, Angaji et al., 2010
LOC_Os01g24550	OS01G0347500	1	13838790	13839085	0	23.142	Inf	0.188486	0	1.93695	Inf	0.861015	0	72.8043	Inf	0.0461657	0	36.5678	Inf	0.0868501	0	217.725	Inf	0.0168989	0.952773	102.455	6.74865	0.059103	fruit bromelain precursor, putative, expressed
LOC_Os01g72290	OS01G0952000	1	41914683	41915921	2554.03	1055.38	-1.27501	0.319234	2853.65	1034.33	-1.46411	0.225976	4272.95	96.4805	-5.46885	0.000104948	1919.95	1237.41	-0.633752	0.585346	2783.62	92.6489	-4.90904	0.000406147	2103.72	1247.16	-0.754303	0.519499	Germin-like protein 1-3 [Source:UniProtKB/Swiss-Prot;Acc:Q942A8]
LOC_Os02g47310	OS02G0701600	2	28894065	28897418	1440.77	439.161	-1.71402	0.228353	1162.71	873.566	-0.412506	0.74918	1066.04	147.976	-2.84882	0.0395127	1418.8	279.567	-2.34341	0.077156	1612.66	225.446	-2.83859	0.0423794	1522.53	404.662	-1.91168	0.145722	Probable tocopherol O-methyltransferase, chloroplastic [Source:UniProtKB/Swiss-Prot;Acc:Q6ZIK0]	qAG2, Jiang et al., 2004; qAG2, Septiningsih et al., 2013
LOC_Os02g53620	OS02G0776400	2	32794229	32798340	304.017	19.9129	-3.93237	0.0765047	511.031	189.821	-1.42877	0.456129	118.34	5.91905	-4.32143	0.0469771	131.582	20.0533	-2.71405	0.173989	375.038	9.26489	-5.33912	0.0199969	275.351	16.9531	-4.02166	0.053232	Putative uncharacterized protein [Source:UniProtKB/TrEMBL;Acc:B9F3I4]
LOC_Os03g18120	OS03G0291200	3	10116219	10120372	143.931	12.9165	-3.47809	0.213367	151.59	18.4011	-3.04232	0.240828	58.6809	0.591905	-6.63138	0.0439378	32.0374	15.3349	-1.06294	0.681514	229.19	1.54415	-7.21359	0.0305052	56.2136	9.58217	-2.5525	0.317311	Expressed protein; Os03g0291200 protein; cDNA clone:002-173-A08, full insert sequence [Source:UniProtKB/TrEMBL;Acc:Q10MX4]
LOC_Os03g19390	OS03G0306900	3	10911697	10913611	139.525	67.2734	-1.05241	0.607356	242.232	45.5184	-2.41187	0.237302	333.503	15.3895	-4.43768	0.0432464	298.634	44.825	-2.736	0.174117	240.858	7.72074	-4.9633	0.0344872	326.801	19.9014	-4.03747	0.0581131	Os03g0306900 protein; Seed maturation protein PM36, putative, expressed; cDNA clone:J033050J24, full insert sequence [Source:UniProtKB/TrEMBL;Acc:Q10MJ3]
LOC_Os04g46740	OS04G0553500	4	27706669	27707965	1699.26	1210.92	-0.488804	0.669514	9078.22	4342.65	-1.06383	0.34978	4053.88	554.615	-2.86974	0.0170937	5207.22	1518.15	-1.7782	0.115625	4387.11	569.791	-2.94477	0.0155346	2705.88	1480.81	-0.869706	0.435497	Pectinesterase [Source:UniProtKB/TrEMBL;Acc:Q0JB65]
LOC_Os05g09704	OS05G0189300	5	5472720	5474678	9502.35	2756.59	-1.7854	0.154315	2253.54	2464.77	0.129264	0.914233	1805.42	172.244	-3.3898	0.00630994	1249.46	2103.24	0.75131	0.500963	4788.82	384.493	-3.63864	0.00387326	4143.61	1076.15	-1.94501	0.0921662	Os05g0189300 protein; Putative acid phosphatase; cDNA clone:001-035-A01, full insert sequence; cDNA clone:006-304-C10, full insert sequence; cDNA clone:006-310-A08, full insert sequence; cDNA clone:J013099D13, full insert sequence [Source:UniProtKB/TrEMBL;Acc:Q60DA3]	qAG5, Jiang et al., 2006
LOC_Os05g09724	OS05G0189900	5	5508436	5510290	828.335	136.161	-2.6049	0.165542	146.902	1371.36	3.22269	0.0726866	75.3072	2.95953	-4.66935	0.0210029	70.9399	93.1889	0.39356	0.820026	280.862	1.54415	-7.50691	0.00202743	110.522	26.5352	-2.05835	0.234265	Os05g0189900 protein; Putative acid phosphatase; Unknow protein; cDNA clone:006-309-B02, full insert sequence [Source:UniProtKB/TrEMBL;Acc:Q60D99]	qAG5, Jiang et al., 2006
LOC_Os05g30500	OS05G0368000	5	17670727	17671568	190.928	177.064	-0.108764	0.927298	57.8231	42.613	-0.440352	0.825743	1191.22	5.91905	-7.65286	0.00128327	58.3538	119.14	1.02976	0.577063	34.1702	0	-10000000000	0.040117	204.846	117.934	-0.796557	0.662095		qAG5, Jiang et al., 2004
LOC_Os05g35570	OS05G0430700	5	21135258	21138615	941.423	341.211	-1.46418	0.30546	1961.3	1465.31	-0.420606	0.747083	916.401	63.9258	-3.84151	0.00848779	779.195	153.349	-2.34517	0.081899	1846.02	211.548	-3.12536	0.0288522	804.141	204.174	-1.97765	0.139095	Os05g0430700 protein; Putative uncharacterized protein OJ1378_A04.2; Putative uncharacterized protein OSJNBb0048I21.13; cDNA clone:J023150B15, full insert sequence [Source:UniProtKB/TrEMBL;Acc:Q6I5V6]	qAG5, Jiang et al., 2004
LOC_Os06g46754	OS06G0681300	6	28390431	28396001	1599.39	280.934	-2.50922	0.0805962	2434.82	1751.01	-0.475631	0.707493	418.591	56.231	-2.8961	0.0346031	632.738	370.396	-0.772539	0.538449	1915.2	160.591	-3.57602	0.0112445	1986.53	332.427	-2.57914	0.0509126	Os06g0681300 protein; Putative uncharacterized protein P0547F09.14; cDNA clone:002-174-C05, full insert sequence [Source:UniProtKB/TrEMBL;Acc:Q653X9]
LOC_Os07g25810	OS07G0440100	7	14824356	14825681	494.945	1571.51	1.66681	0.196413	371.943	915.211	1.29902	0.275996	1022.03	6094.85	2.57616	0.0355937	704.822	3012.71	2.09573	0.0752511	602.561	7330.07	3.60465	0.00517463	660.272	3024.28	2.19546	0.065049	Os07g0440100 protein; Putative glycin-rich protein [Source:UniProtKB/TrEMBL;Acc:Q6Z142]	qAG7, Baltazar et al., 2014
LOC_Os07g41410	OS07G0605400	7	24809650	24810354	923.799	782.524	-0.239445	0.847542	123.46	302.165	1.29129	0.373319	2014.71	46.7605	-5.42914	0.00104418	290.625	438.813	0.59445	0.666449	785.08	86.4723	-3.18253	0.0380526	735.541	173.953	-2.08011	0.144883	Os07g0605400 protein; Putative uncharacterized protein OSJNBb0040H10.32; cDNA clone:J013161J19, full insert sequence; cDNA clone:J033119N22, full insert sequence [Source:UniProtKB/TrEMBL;Acc:Q6Z4F5]	qAG7-2, Angaji et al., 2010; qAG7.3, Septiningsih et al., 2013
LOC_Os07g48020	OS07G0677200	7	28673754	28675351	317.235	231.959	-0.451683	0.778942	73.4509	53.2662	-0.46356	0.795579	30.3185	938.17	4.95158	0.0106318	33.1816	290.183	3.12851	0.0787451	14.1681	855.458	5.91598	0.00379379	196.271	78.8686	-1.31533	0.433931	Os07g0677200 protein; Peroxidase; cDNA clone:001-037-F01, full insert sequence; cDNA clone:J033023C17, full insert sequence [Source:UniProtKB/TrEMBL;Acc:Q7F1U0]	qAG7, Jiang et al., 2004; qAG7-2, Angaji et al., 2010
LOC_Os07g48500	OS07G0684000	7	29008876	29009943	2233.86	6301.09	1.49606	0.238813	1533.09	564.622	-1.44109	0.218443	6295.49	477.076	-3.72203	0.00324979	1766.63	4238.32	1.26249	0.265562	1876.02	284.123	-2.72309	0.0271691	3266.11	1082.78	-1.59283	0.166804	Os07g0684000 protein; Osr40g3; R40g3 protein [Source:UniProtKB/TrEMBL;Acc:Q6Z4N4]	qAG7, Jiang et al., 2004; qAG7-2, Angaji et al., 2010
LOC_Os08g02094	OS08G0112900	8	686288	693733	92.5268	179.216	0.953759	0.633695	361.003	386.422	0.0981655	0.95982	734.49	32.5548	-4.4958	0.0170012	417.63	140.373	-1.57296	0.342659	683.403	4.63245	-7.20482	0.00117891	40.0165	140.047	1.80725	0.289061	Os08g0112900 protein; Putative GDSL-motif lipase/hydrolase protein [Source:UniProtKB/TrEMBL;Acc:Q6ZCC3]
LOC_Os08g04230	OS08G0136500	8	2059654	2061243	0	26.9093	Inf	0.151132	0	1.93695	Inf	0.856692	0.978016	172.836	7.46533	0.033285	1.14419	9.43685	3.04398	0.415929	0	344.345	Inf	0.00854012	0.952773	4.42254	2.21467	0.613383	Os08g0136500 protein; Putative 33-kDa secretory protein; cDNA clone:006-209-E07, full insert sequence [Source:UniProtKB/TrEMBL;Acc:Q6YYB3]
LOC_Os08g40680	OS08G0518800	8	25758874	25759533	0	37.6731	Inf	0.0758269	3.12557	39.7075	3.66722	0.1911	11.7362	598.416	5.67211	0.0314629	6.86515	158.067	4.5251	0.0749919	1.66684	117.355	6.13763	0.0337291	1.90555	52.3334	4.77945	0.0834631	Os08g0518800 protein [Source:UniProtKB/TrEMBL;Acc:Q0J4E6]
LOC_Os10g05980	OS10G0150600	10	3016889	3018047	16804.6	13949.3	-0.268669	0.796029	12464.8	5960.97	-1.06424	0.331974	12965.6	1900.61	-2.77015	0.0165033	4420.01	14428.9	1.70684	0.116253	12758.8	2546.3	-2.32502	0.0431217	21331.6	7628.14	-1.48359	0.172705	Os10g0150600 protein; Proline-rich protein 2; Proline-rich protein, putative, expressed; Putative proline-rich protein; cDNA clone:001-007-C09, full insert sequence; cDNA clone:006-305-B03, full insert sequence; cDNA clone:006-309-F02, full insert sequence; cDNA clone:006-311-G10, full insert sequence; cDNA clone:J023146D17, full insert sequence [Source:UniProtKB/TrEMBL;Acc:Q7GBX3]
LOC_Os11g20090	OS11G0306400	11	11591738	11596168	32.3109	18.2984	-0.820309	0.68359	100.018	10.6532	-3.2309	0.105184	32.2745	586.578	4.18386	0.0360976	110.987	126.218	0.18553	0.921316	5.83393	413.832	6.14843	0.00569274	333.471	697.287	1.06419	0.546239	O-methyltransferase family protein, expressed; Os11g0306400 protein; cDNA clone:001-208-C11, full insert sequence; cDNA clone:006-203-H05, full insert sequence [Source:UniProtKB/TrEMBL;Acc:Q2R6G9]
LOC_Os11g25260	OS11G0439600	11	14390405	14398122	3831.78	654.974	-2.54851	0.0504992	8543.75	4505.35	-0.923229	0.426741	1971.68	233.803	-3.07606	0.0133636	1049.22	703.045	-0.577634	0.610416	13.3347	0	-10000000000	0.0495935	4665.73	1533.88	-1.60491	0.166509	Apyrase; GDA1/CD39 family protein, expressed; Os11g0439600 protein; cDNA clone:001-029-C02, full insert sequence; cDNA clone:006-206-C10, full insert sequence; cDNA clone:J023036G10, full insert sequence [Source:UniProtKB/TrEMBL;Acc:Q53KM3]
LOC_Os11g29840	OS11G0490600	11	17318918	17324441	522.85	118.939	-2.13617	0.159626	281.301	251.804	-0.159816	0.907385	109.538	1276.15	3.54229	0.0172781	99.5447	284.285	1.51392	0.269105	276.695	3268.96	3.56247	0.0177444	405.881	939.052	1.21015	0.372031	Expressed protein; LA; Os11g0490600 protein [Source:UniProtKB/TrEMBL;Acc:Q2R435]
LOC_Os11g36940	OS11G0577800	11	21789932	21791579	652.094	55.4333	-3.55626	0.088973	484.464	214.033	-1.17855	0.51899	110.516	1.18381	-6.54467	0.00656	40.0467	9.43685	-2.08531	0.295419	317.532	13.8973	-4.51402	0.0332834	402.07	28.7465	-3.80599	0.0529725		qAG11, Jiang et al., 2006
LOC_Os11g47610	OS11G0702200	11	28760411	28761600	1.46868	10.2256	2.79959	0.46015	1.56279	6.77934	2.11702	0.596038	5.86809	835.77	7.15407	0.00837109	3.43258	93.1889	4.76279	0.0632944	0	236.255	Inf	0.00350839	0	20.6385	Inf	0.0633605	Chitinase III C10701-rice; Os11g0702200 protein; Xylanase inhibitor protein 1, putative, expressed; cDNA clone:J033027E14, full insert sequence; cDNA clone:J033048M21, full insert sequence; cDNA clone:J033101A20, full insert sequence [Source:UniProtKB/TrEMBL;Acc:Q53NL8]
DE genes in F291, 8753
LOC_Os01g01650	OS01G0106300	1	322591	323923	6221.33	1076.91	-2.53032	0.0654961	323.497	241.151	-0.423815	0.7318	587.787	44.9848	-3.70779	0.00617309	418.774	489.537	0.225243	0.852492	1251.79	435.45	-1.52342	0.232533	4884.87	692.127	-2.81921	0.0270703	Os01g0106300 protein; Putative isoflavone reductase; Uncharacterized protein; cDNA clone:001-038-D01, full insert sequence; cDNA clone:001-207-E04, full insert sequence; cDNA clone:006-302-G05, full insert sequence; cDNA clone:006-303-C06, full insert sequence; cDNA clone:006-307-H12, full insert sequence; cDNA clone:J013045H04, full insert sequence [Source:UniProtKB/TrEMBL;Acc:Q9FTN6]
LOC_Os01g15120	OS01G0255000	1	8486578	8489618	1013.39	390.724	-1.37497	0.360457	806.397	433.878	-0.894203	0.523883	772.632	74.58	-3.37292	0.026058	969.131	156.888	-2.62696	0.0680388	896.758	126.62	-2.82421	0.060705	1089.02	145.944	-2.89955	0.0471996	Os01g0255000 protein; Putative epoxide hydrolase; cDNA clone:001-202-G06, full insert sequence; cDNA clone:J033091B05, full insert sequence [Source:UniProtKB/TrEMBL;Acc:Q9S7P1]
LOC_Os01g68020	OS01G0908200	1	39544235	39548599	467.04	235.188	-0.989733	0.548248	259.422	144.303	-0.846201	0.595372	672.875	58.5986	-3.5214	0.0398433	637.315	130.936	-2.28314	0.153546	259.193	100.37	-1.3687	0.411345	1015.66	31.6949	-5.00202	0.00549765	Os01g0908200 protein; P0497A05.15 protein; Putative BTB and TAZ domain protein; Uncharacterized protein; cDNA clone:J013099J01, full insert sequence [Source:UniProtKB/TrEMBL;Acc:Q8L3R7]	qAG1-2, Angaji et al., 2010
LOC_Os02g48900	OS02G0720900	2	29911311	29916314	12358.9	6745.64	-0.873528	0.451511	7779.55	5491.26	-0.502548	0.645849	3868.05	423.804	-3.19014	0.00714204	1409.64	3010.35	1.0946	0.311709	6564	1845.26	-1.83075	0.110782	5800.48	802.691	-2.85326	0.0131249	Os02g0720900 protein; Putative chloroplast nucleoid DNA-binding protein cnd41; cDNA clone:001-035-D10, full insert sequence [Source:UniProtKB/TrEMBL;Acc:Q6Z671]	qAG2, Jiang et al., 2004; qAG2, Septiningsih et al., 2013
LOC_Os03g51459	OS03G0724500	3	29448215	29450245	45.5291	428.935	3.2359	0.066509	54.6975	83.289	0.606651	0.71695	96.8236	1886.99	4.28459	0.0127486	132.726	668.837	2.3332	0.13604	70.8406	386.037	2.44609	0.135618	56.2136	516.7	3.20033	0.0499454	Expressed protein; Os03g0724500 protein [Source:UniProtKB/TrEMBL;Acc:Q75GV2]	qAG3-1, Angaji et al., 2010
LOC_Os03g51690	OS03G0727000	3	29596367	29605885	39.6543	400.949	3.33787	0.143986	37.5069	1.93695	-4.27529	0.0918008	15.6483	417.293	4.73699	0.0367701	60.6422	109.703	0.855214	0.666256	48.3383	416.92	3.10853	0.146485	1.90555	117.934	5.95164	0.0189063		qAG3-1, Angaji et al., 2010
LOC_Os04g20164	OS04G0269600	4	11236469	11243987	3847.94	681.883	-2.49649	0.0853775	695.44	530.725	-0.38996	0.762203	290.471	42.6172	-2.76889	0.0457471	316.941	239.46	-0.40443	0.752608	755.077	430.818	-0.809547	0.549621	2735.41	376.653	-2.86045	0.0342589	cDNA clone:J023110G01, full insert sequence [Source:UniProtKB/TrEMBL;Acc:B7EQP9]
LOC_Os04g54620	OS04G0639100	4	32478683	32479514	207.084	149.616	-0.46895	0.762954	304.743	90.0683	-1.7585	0.281748	1292.94	71.6205	-4.17413	0.0180641	510.31	53.0823	-3.26507	0.0519468	434.211	67.9426	-2.67601	0.117536	664.083	65.601	-3.33957	0.0475027
LOC_Os05g04500	OS05G0135500	5	2080597	2082747	8237.82	2368.02	-1.79858	0.161987	1786.26	1534.07	-0.219584	0.848621	728.622	134.954	-2.4327	0.0483934	488.57	1030.98	1.07737	0.350699	1025.1	313.462	-1.70941	0.163507	6146.34	865.343	-2.82838	0.0206593	Os05g0135500 protein; Putative peroxidase; cDNA clone:001-010-F08, full insert sequence; cDNA clone:001-208-F04, full insert sequence; cDNA clone:006-203-F03, full insert sequence; cDNA clone:006-306-D07, full insert sequence; cDNA clone:006-310-F02, full insert sequence; cDNA clone:006-311-B10, full insert sequence; cDNA clone:J013044L23, full insert sequence [Source:UniProtKB/TrEMBL;Acc:Q6AVZ3]
LOC_Os05g42150	OS05G0500900	5	24643665	24645918	86.6521	399.873	2.20624	0.226222	17.1906	75.5412	2.13564	0.23144	96.8236	1067.2	3.46234	0.047293	62.9306	624.012	3.30974	0.0523622	139.181	617.66	2.14985	0.204024	38.1109	438.568	3.52453	0.042263	Probable indole-3-acetic acid-amido synthetase GH3.4 [Source:UniProtKB/Swiss-Prot;Acc:Q60EJ6]
LOC_Os06g44750	OS06G0657500	6	27025485	27029339	5.87472	261.021	5.4735	0.0549262	32.8185	6.77934	-2.27529	0.372852	3.91206	456.359	6.8661	0.0160779	26.3164	8.25724	-1.67223	0.503809	12.5013	115.811	3.21163	0.198068	0	44.2254	Inf	0.0332894	Aintegumenta-like protein; Os06g0657500 protein [Source:UniProtKB/TrEMBL;Acc:Q67VJ6]
LOC_Os07g03770	OS07G0129700	7	1566125	1572085	24.9675	426.782	4.09537	0.056632	64.0742	34.8652	-0.877957	0.649367	26.4064	563.494	4.41544	0.0320572	83.526	178.121	1.09256	0.546766	78.3413	716.485	3.19309	0.106306	0.952773	78.8686	6.37117	0.012254	Homeobox protein knotted-1-like 12 [Source:UniProtKB/Swiss-Prot;Acc:O80416]
LOC_Os07g32620	OS07G0510400	7	19454526	19456170	3225.22	730.858	-2.14173	0.146303	781.393	617.888	-0.338702	0.797316	185.823	22.4924	-3.04642	0.0355832	120.14	142.732	0.248593	0.856575	557.557	213.093	-1.38764	0.319414	2321.91	218.179	-3.41173	0.0162734	Os07g0510400 protein; Putative glucosyltransferase; cDNA clone:001-204-G12, full insert sequence; cDNA clone:001-204-H01, full insert sequence [Source:UniProtKB/TrEMBL;Acc:Q6Z4C0]	qAG7.2, Septiningsih et al., 2013
LOC_Os07g32630	OS07G0510500	7	19462349	19464260	4062.37	582.857	-2.80111	0.063189	664.184	802.867	0.273579	0.843259	74.3292	7.69477	-3.27198	0.030763	76.6609	122.679	0.678326	0.616102	466.714	128.164	-1.86454	0.186206	1769.3	237.343	-2.89813	0.0376659	Os07g0510500 protein; Putative glucosyltransferase-3 [Source:UniProtKB/TrEMBL;Acc:Q6Z4B7]	qAG7.2, Septiningsih et al., 2013
LOC_Os08g35750	OS08G0459700	8	22553089	22554026	549.286	188.904	-1.53991	0.395205	34.3813	20.338	-0.757445	0.690724	781.435	2.36762	-8.36654	0.000248423	239.136	38.927	-2.61899	0.133458	190.853	18.5298	-3.36454	0.0759165	1004.22	53.8075	-4.22213	0.022298	Germin-like protein 8-13 [Source:UniProtKB/Swiss-Prot;Acc:Q6Z964]	qAG8-1, Angaji et al., 2010
LOC_Os09g31130	OS09G0484900	9	18715940	18718840	57.2785	59.2006	0.0476176	1	110.958	11.6217	-3.25512	0.163666	287.537	10.0624	-4.8367	0.0467644	347.834	47.1842	-2.88202	0.189642	89.1758	21.6181	-2.04441	0.381409	217.232	7.3709	-4.88125	0.0444769	Os09g0484900 protein; cDNA clone:001-202-D02, full insert sequence; cDNA clone:J013123J03, full insert sequence [Source:UniProtKB/TrEMBL;Acc:Q0J0T0]
LOC_Os10g33040	OS10G0468500	10	17312261	17316877	183.585	1414.36	2.94563	0.0548361	67.1998	147.208	1.13133	0.430807	317.855	2308.43	2.86047	0.0482966	177.35	703.045	1.98702	0.149251	105.011	707.22	2.75162	0.0610353	181.98	1477.13	3.02095	0.0353164	Leucine Rich Repeat family protein, expressed; Os10g0468500 protein [Source:UniProtKB/TrEMBL;Acc:Q337M0]
LOC_Os10g38700	OS10G0530400	10	20619376	20620523	630.063	121.63	-2.37299	0.234694	100.018	91.0368	-0.135742	0.944704	83.1313	0.591905	-7.13388	0.00536083	138.447	46.0046	-1.58949	0.381261	194.186	30.883	-2.65256	0.176623	964.207	19.9014	-5.5984	0.00768968	Glutathione S-transferase GSTU6, putative, expressed; Os10g0530400 protein; Putative glutathione S-transferase; cDNA clone:001-205-A09, full insert sequence; cDNA clone:006-305-F07, full insert sequence; cDNA clone:J013101K13, full insert sequence [Source:UniProtKB/TrEMBL;Acc:Q8S718]
LOC_Os11g15624	OS11G0262600	11	8864479	8866289	1856.41	866.481	-1.09928	0.397262	579.793	1413.98	1.28615	0.300502	418.591	29.5953	-3.8221	0.00496458	728.85	641.706	-0.183711	0.878415	414.209	336.624	-0.299219	0.821189	8580.68	1377.62	-2.63891	0.0363639	Os11g0262600 protein [Source:UniProtKB/TrEMBL;Acc:Q9FRT1]
LOC_Os12g02370	OS12G0115700	12	766441	768578	10348.3	1796.47	-2.52616	0.0537048	1476.83	1907.9	0.369479	0.756063	529.107	76.9477	-2.78161	0.0254396	339.825	465.944	0.455365	0.691958	1677.67	492.583	-1.76802	0.146915	5970.08	839.545	-2.83007	0.0199905	Chalcone-flavanone isomerase family protein, expressed; Os12g0115700 protein [Source:UniProtKB/TrEMBL;Acc:Q2QYK6]
LOC_Os12g27220	OS12G0493900	12	18618482	18621147	10.2808	0	-10000000000	0.203662	0	0	NA	NA	155.505	0	-10000000000	0.0249157	0	1.17961	Inf	0.990974	0.833418	0	-10000000000	1	144.822	0	-10000000000	0.0294717	Os12g0493900 protein; Pumilio-family RNA binding repeat containing protein, expressed [Source:UniProtKB/TrEMBL;Acc:Q2QQH7]
LOC_Os12g31000					452.353	258.33	-0.808236	0.633376	267.236	203.38	-0.393937	0.812133	306.119	23.6762	-3.69258	0.0426879	361.565	166.324	-1.12025	0.492407	472.548	81.8399	-2.52959	0.153837	675.516	30.2207	-4.48238	0.0153667
DE genes in F274-2a, 8391
LOC_Os01g02920	OS01G0118700	1	1071962	1074829	599.221	758.844	0.340714	0.850308	120.334	495.86	2.04288	0.155694	197.559	657.015	1.73364	0.222866	51.4887	760.846	3.88528	0.00992649	129.18	1565.77	3.59942	0.0181678	449.709	1589.17	1.82121	0.189632	Os01g0118700 protein; Putative HGA6; Uncharacterized protein; cDNA clone:J023054L18, full insert sequence [Source:UniProtKB/TrEMBL;Acc:Q9FTE2]
LOC_Os01g18080	OS01G0283300	1	10134096	10135327	2411.57	3343.22	0.471264	0.752035	565.728	736.042	0.379679	0.766319	826.423	308.383	-1.42216	0.261457	597.268	3683.91	2.62479	0.0400178	685.07	63.3101	-3.43574	0.0127251	1196.68	305.892	-1.96795	0.118175	GABA-A receptor epsilon-like subunit; Os01g0283300 protein; Putative GABA-A receptor epsilon-like subunit; Uncharacterized protein; cDNA clone:001-040-C08, full insert sequence; cDNA clone:001-208-C09, full insert sequence; cDNA clone:006-302-D10, full insert sequence [Source:UniProtKB/TrEMBL;Acc:Q9ARY7]	qAG1-1, Angaji et al., 2010
LOC_Os01g19020	OS01G0294700	1	10748692	10750233	7145.12	4959.93	-0.526639	0.642706	865.783	2106.44	1.28273	0.25871	2119.36	2635.16	0.314263	0.783385	567.519	2964.35	2.38497	0.0363234	1447.65	8245.75	2.50994	0.0343536	4111.22	7457.14	0.859056	0.435121	Class III peroxidase 11; Os01g0294700 protein; Putative peroxidase; cDNA clone:001-039-C08, full insert sequence; cDNA clone:006-201-G02, full insert sequence; cDNA clone:J013159G18, full insert sequence [Source:UniProtKB/TrEMBL;Acc:Q9FYP0]	qAG1-1, Angaji et al., 2010
LOC_Os01g41120	OS01G0594300	1	23285238	23287336	126.306	230.344	0.866862	0.659751	42.1952	59.0771	0.485519	0.794218	216.141	793.153	1.87562	0.266721	22.8838	544.978	4.5738	0.0131824	75.0076	894.062	3.57527	0.0473347	63.8358	371.493	2.5409	0.13363	Extensin-like; Os01g0594300 protein [Source:UniProtKB/TrEMBL;Acc:Q5ZB68]	qAG1-2, Angaji et al., 2010
LOC_Os02g11770	OS02G0208500	2	6078179	6079111	4348.76	3707.03	-0.230339	0.829755	936.109	4038.55	2.10909	0.0799725	383.382	358.103	-0.0984102	0.930924	466.83	3335.93	2.83712	0.0189114	3227.83	571.335	-2.49816	0.0431855	3969.25	1096.05	-1.85655	0.1137	Os02g0208500 protein [Source:UniProtKB/TrEMBL;Acc:A3A4E0]
LOC_Os02g32690	OS02G0528900	2	19406608	19420786	370.107	829.884	1.16497	0.427274	101.581	446.468	2.13592	0.11732	238.636	712.654	1.57839	0.2375	94.968	721.919	2.92632	0.0316352	99.1768	3383.23	5.09226	0.000840509	683.138	2989.64	2.12972	0.106858
LOC_Os02g37160	OS02G0582600	2	22468206	22469788	39.6543	118.939	1.58468	0.556683	9.37671	70.6988	2.91453	0.248673	106.604	66.2934	-0.685321	0.761198	2.28838	162.786	6.1525	0.0297735	3.33367	149.782	5.48961	0.0453851	40.0165	242.503	2.59933	0.260114	Os02g0582600 protein; Putative uncharacterized protein OSJNBa0016D04.17; cDNA clone:006-204-E03, full insert sequence; cDNA clone:J033092A09, full insert sequence [Source:UniProtKB/TrEMBL;Acc:Q6EPT4]	qAG2-1, Angaji et al., 2010
LOC_Os03g05620	OS03G0150600	3	2807616	2809540	941.423	3392.19	1.8493	0.154012	304.743	1135.05	1.8971	0.118787	2153.59	2855.94	0.407223	0.734551	290.625	4882.39	4.07036	0.00158678	431.711	2518.51	2.54443	0.0423234	1230.03	3606.58	1.55194	0.187213	Inorganic phosphate transporter 1-1 [Source:UniProtKB/Swiss-Prot;Acc:Q8H6H4]
LOC_Os03g12890	OS03G0231600	3	6948035	6950951	762.245	925.682	0.280262	0.883629	160.967	623.699	1.95409	0.176675	182.889	430.907	1.23641	0.386909	73.2283	1087.6	3.8926	0.0103022	109.178	1213.7	3.47466	0.023472	308.699	1093.84	1.82513	0.193729	Branched-chain-amino-acid aminotransferase [Source:UniProtKB/TrEMBL;Acc:Q8GRH8]
LOC_Os03g20550	OS03G0321700	3	11650891	11652144	304.017	1300.26	2.09658	0.160235	198.474	552.032	1.4758	0.285063	672.875	1334.75	0.988155	0.469617	133.87	1058.11	2.98258	0.0336929	81.675	1664.59	4.34913	0.00446579	236.288	1105.63	2.22626	0.104451	Os03g0321700 protein; WRKY DNA binding domain containing protein, expressed; cDNA clone:J033057D07, full insert sequence [Source:UniProtKB/TrEMBL;Acc:Q10M65]
LOC_Os03g26530	OS03G0382100	3	15149948	15151948	3088.63	1109.74	-1.47674	0.312729	1051.75	890.999	-0.239303	0.857073	30.3185	23.0843	-0.393286	0.800259	21.7397	773.822	5.1536	0.00111246	71.674	6.1766	-3.53657	0.0364397	937.529	179.85	-2.38207	0.0866811	3-ketoacyl-CoA synthase [Source:UniProtKB/TrEMBL;Acc:Q75M74]
LOC_Os03g29190	OS03G0405500	3	16590192	16595911	577.191	772.837	0.421115	0.782563	181.283	798.993	2.13994	0.0991189	1159.93	1625.37	0.486736	0.701467	141.88	1355.37	3.25594	0.013493	205.021	5768.94	4.81446	0.000843756	457.331	1593.59	1.80097	0.150909	Probable nucleoredoxin 1-1 [Source:UniProtKB/Swiss-Prot;Acc:Q7Y0E8]	qAG3, Baltazar et al., 2014
LOC_Os03g29410	OS03G0407900	3	16749318	16754223	38.1857	482.216	3.65858	0.0866792	9.37671	50.3608	2.42515	0.252074	56.7249	532.123	3.2297	0.103101	8.00935	465.944	5.86233	0.00822119	7.50076	185.298	4.62666	0.0328171	100.994	257.244	1.34887	0.463638	Os03g0407900 protein; Serine/threonine-protein kinase NAK, putative, expressed; cDNA clone:J013145E01, full insert sequence [Source:UniProtKB/TrEMBL;Acc:Q10JU0]	qAG3, Baltazar et al., 2014
LOC_Os03g38540	OS03G0582000	3	21392897	21394893	599.221	3413.18	2.50996	0.050128	210.976	477.459	1.1783	0.32151	2476.34	6525.75	1.39794	0.236324	707.111	6261.35	3.14647	0.00968117	484.216	3912.87	3.01451	0.0160775	1161.43	1869.26	0.686564	0.547357	Expressed protein; Formiminotransferase-cyclodeaminase, putative, expressed [Source:UniProtKB/TrEMBL;Acc:Q75ID2]	qAG3, Baltazar et al., 2014
LOC_Os03g52040	OS03G0730400	3	29858907	29864431	2088.46	1912.18	-0.127224	0.895447	915.792	3126.24	1.77134	0.14837	608.326	2263.45	1.8956	0.123885	180.782	1985.28	3.45701	0.00671383	372.538	2396.52	2.68548	0.0356209	1387.24	3371.45	1.28115	0.280392	Serine carboxypeptidase family protein, expressed; cDNA clone:J013128F10, full insert sequence [Source:UniProtKB/TrEMBL;Acc:Q10DG3]	qAG3-1, Angaji et al., 2010
LOC_Os04g32110	OS04G0391500	4	19269218	19271304	421.511	1450.41	1.78282	0.211783	160.967	776.718	2.27063	0.0916759	531.063	1293.9	1.28478	0.327677	322.662	2761.46	3.09733	0.0215631	212.522	1599.74	2.91215	0.0357589	406.834	1549.36	1.92916	0.137938	ACT-domain repeat protein 6; OSJNBa0055C08.5 protein; Os04g0391500 protein; cDNA clone:J013102O07, full insert sequence [Source:UniProtKB/TrEMBL;Acc:Q7XVN5]
LOC_Os04g33610	OS04G0412100	4	20358641	20359628	70.4966	277.166	1.97513	0.360625	21.879	153.988	2.8152	0.169414	37.1646	288.85	2.95832	0.141694	11.4419	326.751	4.83579	0.0248193	15.0015	390.67	4.70277	0.0307029	55.2608	385.498	2.80239	0.151889	OSJNBa0073L04.6 protein; Os04g0412100 protein; cDNA clone:002-140-E12, full insert sequence [Source:UniProtKB/TrEMBL;Acc:Q7XVG6]
LOC_Os04g35130	OS04G0430600	4	21350888	21353253	157.149	729.782	2.21533	0.1623	59.3859	241.151	2.02174	0.176469	431.305	1508.77	1.80659	0.215427	130.438	1420.25	3.44471	0.0223104	72.5074	730.382	3.33245	0.0320909	146.727	777.63	2.40595	0.0986207	Os04g0430600 protein [Source:UniProtKB/TrEMBL;Acc:Q0JD54]
LOC_Os04g44320	OS04G0524600	4	26247730	26252252	284.924	1674.3	2.55491	0.0914434	59.3859	409.666	2.78626	0.0561477	338.393	1638.99	2.27603	0.107631	90.3912	1389.58	3.94232	0.00774397	93.3429	775.163	3.05389	0.0384775	214.374	1099	2.35799	0.0904418	Probable metal-nicotianamine transporter YSL12 [Source:UniProtKB/Swiss-Prot;Acc:Q5JQD7]
LOC_Os05g31140	OS05G0375400	5	18106229	18110985	803.368	2366.41	1.55857	0.298038	159.404	925.864	2.53811	0.0731198	145.724	59.7824	-1.28545	0.353352	120.14	1143.04	3.25008	0.0222704	150.849	1970.33	3.70727	0.0129035	307.746	424.564	0.464242	0.727612	'putative beta-1,3-glucanase'; Os05g0375400 protein; cDNA clone:001-034-H03, full insert sequence [Source:UniProtKB/TrEMBL;Acc:Q75K72]	qAG5, Jiang et al., 2004
LOC_Os05g40770	OS05G0486100	5	23899480	23905448	212.958	1612.95	2.92105	0.0500943	156.279	370.927	1.24701	0.362451	671.897	1795.25	1.41787	0.296689	227.694	2136.27	3.22992	0.0212004	55.839	506.481	3.18116	0.0291887	485.914	952.32	0.970744	0.460749	Os05g0486100 protein [Source:UniProtKB/TrEMBL;Acc:Q0DH82]
LOC_Os06g06290	OS06G0157000	6	2908048	2910483	5755.75	6068.6	0.076358	0.97427	1556.53	6053.95	1.95954	0.0818755	2820.6	5323.59	0.9164	0.408565	832.972	6799.25	3.02904	0.00809845	3066.15	17695.9	2.52892	0.0296021	2072.28	7429.13	1.84197	0.0946893	Os06g0157000 protein [Source:UniProtKB/TrEMBL;Acc:Q0DEF1]
LOC_Os06g21210	OS06G0316800	6	12252282	12253365	3799.47	19408.6	2.35283	0.0579732	545.412	2481.24	2.18564	0.0617631	416.635	236.17	-0.818956	0.471921	336.393	6898.34	4.35803	0.000493875	812.583	95.7372	-3.08536	0.0122433	1821.7	2147.14	0.237131	0.830908	Os06g0316800 protein; Putative glycine rich protein; cDNA clone:001-102-A04, full insert sequence [Source:UniProtKB/TrEMBL;Acc:Q5Z4Q3]
LOC_Os06g21240	OS06G0317200	6	12279981	12281401	2595.16	2740.45	0.0785905	0.983337	235.981	1059.51	2.16666	0.1017	149.636	69.2529	-1.11151	0.39506	110.987	1399.01	3.65595	0.00764808	650.066	66.3984	-3.29137	0.0189222	2406.71	960.428	-1.32531	0.294131	Os06g0317200 protein; Putative glycine rich protein [Source:UniProtKB/TrEMBL;Acc:Q5Z4P7]
LOC_Os06g27560	OS06G0470000	6	15601705	15603783	838.616	2669.95	1.67073	0.21854	164.092	566.559	1.78772	0.159913	1085.6	2127.31	0.970539	0.436518	263.164	2647.04	3.33034	0.0104591	147.515	3287.49	4.47805	0.00143836	952.773	1574.42	0.724619	0.549281	Os06g0470150 protein; Putative HGA4; cDNA, clone: J100088A21, full insert sequence [Source:UniProtKB/TrEMBL;Acc:Q69XT9]
LOC_Os06g32990	OS06G0521500	6	19205574	19207119	19.0928	423.015	4.46961	0.0863802	0	32.9282	Inf	0.0728495	10.7582	101.808	3.24234	0.179091	0	185.198	Inf	0.00681758	5.00051	185.298	5.21163	0.0468466	13.3388	138.573	3.37694	0.152076	Class III peroxidase 83; Os06g0521500 protein; Putative peroxidase; cDNA clone:006-208-C10, full insert sequence; cDNA clone:J023143E11, full insert sequence [Source:UniProtKB/TrEMBL;Acc:Q5Z9B2]
LOC_Os06g36270	OS06G0557100	6	21255242	21259517	555.161	1083.37	0.964549	0.524394	139.088	698.272	2.32779	0.0947134	396.096	1247.14	1.6547	0.224919	130.438	1134.78	3.12098	0.0254783	190.853	1604.37	3.07148	0.0328211	316.321	1783.02	2.49486	0.068001	Os06g0557100 protein; Putative serine-threonine protein kinase [Source:UniProtKB/TrEMBL;Acc:Q5Z7H5]
LOC_Os07g35750	OS07G0541900	7	21414427	21419296	104.276	258.33	1.3088	0.462027	50.0091	196.601	1.97501	0.225613	72.3732	539.817	2.89894	0.0781023	54.9212	1021.54	4.21724	0.0130905	22.5023	790.604	5.13481	0.00478454	350.621	905.146	1.36824	0.3725	Os07g0541900 protein; Putative serine/threonine kinase-related protein; cDNA clone:002-145-F04, full insert sequence [Source:UniProtKB/TrEMBL;Acc:Q6Z5A7]
LOC_Os08g05960	OS08G0155900	8	3242803	3243430	8.81208	101.717	3.52894	0.170083	3.12557	9.68477	1.6316	0.617003	40.0986	533.307	3.73334	0.105299	0	289.004	Inf	0.00308777	2.50025	140.518	5.81253	0.0290201	13.3388	151.84	3.50885	0.125213	Os08g0155900 protein; Putative uncharacterized protein P0438H08.5 [Source:UniProtKB/TrEMBL;Acc:Q6ZDA6]
LOC_Os08g08970	OS08G0189200	8	5222239	5223278	298.142	1413.28	2.24498	0.192414	50.0091	380.611	2.92806	0.0776623	42.0547	89.3777	1.08765	0.502326	42.3351	679.453	4.00445	0.0176183	18.3352	501.848	4.77456	0.00798106	164.83	709.817	2.10647	0.178353	Germin-like protein 8-3 [Source:UniProtKB/Swiss-Prot;Acc:Q6YZZ7]
LOC_Os08g36310	OS08G0465700	8	22876101	22877792	387.731	499.976	0.366801	0.87064	12.5023	75.5412	2.59507	0.160703	50.8568	265.765	2.38564	0.166836	29.749	471.842	3.98739	0.0262387	37.5038	480.23	3.67862	0.0430361	219.138	918.414	2.06731	0.211836	Os08g0465700 protein; Putative Cyt-P450 monooxygenase [Source:UniProtKB/TrEMBL;Acc:Q6YSB4]	qAG8-1, Angaji et al., 2010
LOC_Os09g11480	OS09G0287000	9	6404482	6406039	361.295	307.843	-0.230983	0.863867	23.4418	127.839	2.44717	0.150716	72.3732	446.888	2.62639	0.111619	9.15354	345.625	5.23873	0.00465896	123.346	1534.88	3.63735	0.0344791	248.674	565.348	1.18488	0.444304	AP2/ERF domain protein; Ethylene responsive protein-like; Os09g0287000 protein; cDNA clone:001-206-F09, full insert sequence; cDNA clone:J013163J01, full insert sequence [Source:UniProtKB/TrEMBL;Acc:Q6EN65]	qAG9-1, Angaji et al., 2010
LOC_Os09g26310	OS09G0433000	9	15896393	15897948	497.882	626.988	0.332633	0.867699	60.9486	405.792	2.73507	0.0832852	81.1753	397.168	2.29064	0.139309	49.2003	778.54	3.98403	0.0136978	131.68	1213.7	3.2043	0.0460299	299.171	725.296	1.2776	0.384325	Os09g0433000 protein; Putative uncharacterized protein OJ1081_G10.4; Putative uncharacterized protein OSJNBa0039E17.37; cDNA clone:J023035N15, full insert sequence [Source:UniProtKB/TrEMBL;Acc:Q69MI0]
LOC_Os09g29510	OS09G0471200	9	17949936	17954035	14.6868	153.921	3.3896	0.219597	1.56279	46.4869	4.89463	0.121937	11.7362	104.767	3.15815	0.214405	2.28838	139.194	5.92662	0.04179	2.50025	281.035	6.81253	0.0221213	3.81109	100.244	4.71717	0.0826599
LOC_Os09g37050	OS09G0542600	9	21370810	21372435	914.987	664.123	-0.462302	0.766012	193.785	290.543	0.584292	0.727918	13.6922	12.43	-0.139529	0.972872	12.5861	297.261	4.56182	0.0139324	196.687	9.26489	-4.40798	0.0231309	834.629	115.723	-2.85046	0.0914057	Os09g0542600 protein; Zinc finger protein-like [Source:UniProtKB/TrEMBL;Acc:Q651B8]
LOC_Os10g22520	OS10G0370500	10	11666794	11673481	1669.89	3278.64	0.973344	0.451356	379.757	1113.75	1.55228	0.189008	666.029	3350.18	2.33058	0.052574	359.276	3859.67	3.42531	0.00524063	1085.11	6158.07	2.50464	0.0408108	1536.82	6053.72	1.97787	0.0898814	Cellulase containing protein, expressed; Os10g0370500 protein; Putative Glucan 1,3-beta-glucosidase; cDNA clone:J013001E03, full insert sequence [Source:UniProtKB/TrEMBL;Acc:Q8RU06]
LOC_Os11g02610	OS11G0118300	11	823449	825737	2203.02	1918.1	-0.199805	0.856415	292.241	1356.84	2.21502	0.0895809	494.876	1024	1.04907	0.411315	279.183	2166.94	2.95637	0.0237313	392.54	2424.31	2.62666	0.0495125	265.824	1041.51	1.97013	0.121131	Os11g0118300 protein; RPT2, putative, expressed; cDNA clone:J013001C20, full insert sequence [Source:UniProtKB/TrEMBL;Acc:Q2RBB0]
LOC_Os11g10710	OS11G0213000	11	5873537	5881813	132.181	208.278	0.655997	0.751428	15.6279	158.83	3.34529	0.0722083	82.1533	401.312	2.28833	0.186483	11.4419	405.785	5.14831	0.00780954	37.5038	1247.67	5.05606	0.00884489	191.507	405.399	1.08194	0.509889	Protein kinase domain containing protein, expressed [Source:UniProtKB/TrEMBL;Acc:Q2R8X2]
LOC_Os11g11940	OS11G0226700	11	6624842	6629238	80.7774	111.405	0.463787	0.818972	831.402	976.225	0.231667	0.883603	781.435	938.17	0.263724	0.867491	8.00935	169.863	4.40655	0.0123858	15.8349	398.39	4.653	0.00847561	102.9	312.526	1.60274	0.293295	Os11g0226700 protein [Source:UniProtKB/TrEMBL;Acc:Q0ITR1]
LOC_Os11g11960	OS11G0226933	11	6638306	6640336	334.859	1074.76	1.68239	0.260031	220.353	281.827	0.354994	0.800664	253.306	465.829	0.87892	0.521125	161.331	2322.64	3.84767	0.00799749	54.1722	764.354	3.81862	0.0109551	835.582	2001.2	1.26001	0.343358	Os11g0226933 protein [Source:UniProtKB/TrEMBL;Acc:C7J895]
LOC_Os11g12320	OS11G0229300	11	6872016	6877424	195.334	403.102	1.0452	0.600112	39.0696	133.65	1.77434	0.323402	206.361	154.487	-0.417685	0.804674	60.6422	1308.18	4.4311	0.0181571	5.83393	138.973	4.5742	0.0237966	57.1664	304.418	2.41281	0.167343	Leucine Rich Repeat family protein; Leucine Rich Repeat, putative; Os11g0229300 protein [Source:UniProtKB/TrEMBL;Acc:Q53Q38]
LOC_Os11g32100	OS11G0523700	11	18922046	18925254	1296.84	462.303	-1.4881	0.242324	5710.42	3696.68	-0.627368	0.590272	2497.85	474.708	-2.39558	0.0503804	4219.78	543.798	-2.95602	0.0154173	3629.54	591.409	-2.61756	0.035648	1253.85	698.024	-0.845016	0.464191	Helix-loop-helix DNA-binding domain containing protein, expressed; Os11g0523700 protein [Source:UniProtKB/TrEMBL;Acc:Q2R3F6]
LOC_Os12g14699	OS12G0249900	12	8407899	8417651	23.4989	141.543	2.59058	0.231522	0	0	NA	NA	90.9555	747.576	3.03899	0.123518	8.00935	378.654	5.56305	0.0116248	8.33418	511.113	5.93846	0.00870055	27.6304	215.23	2.96155	0.129861	Os12g0249900 protein; Protein kinase domain containing protein, expressed [Source:UniProtKB/TrEMBL;Acc:Q2QUY3]
LOC_Os12g17430					152.743	696.952	2.18996	0.217041	3.12557	2.90543	-0.105368	1	283.625	1046.49	1.8835	0.247155	62.9306	1159.55	4.20366	0.015379	4.16709	109.635	4.71752	0.0149328	169.594	282.305	0.735175	0.638968
LOC_Os12g38760	OS12G0576700	12	23810618	23814363	375.982	529.038	0.492708	0.788578	84.3904	259.552	1.62087	0.289247	312.965	867.733	1.47125	0.328076	85.8144	721.919	3.07254	0.0463484	103.344	1281.64	3.63247	0.0252388	88.6079	687.705	2.95628	0.0552629	Diphosphonucleotide phosphatase 1, putative, expressed; Os12g0576700 protein [Source:UniProtKB/TrEMBL;Acc:Q2QN73]	qAG12, Septiningsih et al., 2013
LOC_Os12g41710	OS12G0611100	12	25820882	25824699	707.903	360.585	-0.973212	0.491266	123.46	544.284	2.14032	0.126849	155.505	741.065	2.25264	0.107753	58.3538	635.808	3.44569	0.0166112	196.687	2257.55	3.52078	0.017049	1031.85	1908.33	0.887069	0.502403		qAG12, Septiningsih et al., 2013
LOC_Os12g43640	OS12G0632800	12	27109127	27112150	381.857	1009.64	1.40274	0.384863	76.5765	376.737	2.29859	0.128331	164.307	1292.72	2.97595	0.0513212	74.3725	777.36	3.38574	0.0265196	40.8375	985.167	4.5924	0.00542852	200.082	684.019	1.77344	0.219283	Putative uncharacterized protein [Source:UniProtKB/TrEMBL;Acc:A3CJR0]
DE genes in F274-2a, 8753
LOC_Os01g04350	OS01G0135900	1	1941012	1941851	4514.72	1584.96	-1.51019	0.263453	726.695	1224.15	0.752363	0.552028	496.832	481.219	-0.0460649	0.967712	223.117	1804.8	3.01596	0.0207051	594.227	565.158	-0.0723593	0.964612	1982.72	315.474	-2.65189	0.0399341	17.9 kDa heat shock protein 2 [Source:UniProtKB/Swiss-Prot;Acc:Q943E9]
LOC_Os01g09770	OS01G0194000	1	5037239	5039252	2402.76	2007.98	-0.25895	0.817857	1406.51	710.862	-0.984475	0.418375	584.853	780.723	0.416735	0.736844	307.788	2546.77	3.04866	0.0160754	1029.27	362.875	-1.50408	0.233094	5400.32	953.057	-2.50241	0.0443938	Os01g0194000 protein [Source:UniProtKB/TrEMBL;Acc:Q0JPY0]
LOC_Os01g09830	OS01G0194600	1	5085833	5086504	105.745	583.395	2.46388	0.18816	114.083	115.249	0.0146628	1	148.658	433.866	1.54525	0.36483	43.4793	540.26	3.63525	0.0415025	98.3434	233.166	1.24546	0.46708	42.8748	812.273	4.24376	0.0206182	Monothiol glutaredoxin-S2 [Source:UniProtKB/Swiss-Prot;Acc:Q5SMY5]
LOC_Os01g62760	OS01G0846300	1	36343948	36346009	1107.38	696.952	-0.668024	0.613899	1247.1	430.004	-1.53616	0.242672	2445.04	604.927	-2.01502	0.130407	3223.19	212.329	-3.92411	0.00514829	586.727	109.635	-2.41999	0.0796799	484.962	62.6526	-2.95242	0.0301929	Probable protein phosphatase 2C 9 [Source:UniProtKB/Swiss-Prot;Acc:Q5N9N2]	qAG1-2, Angaji et al., 2010
LOC_Os02g43280	OS02G0647900	2	26079797	26085467	17292.2	7140.66	-1.27599	0.277646	7727.97	5093.22	-0.601512	0.579918	807.841	1582.16	0.969754	0.381962	842.125	6792.17	3.01177	0.00829574	5444.72	1247.67	-2.12562	0.0634731	13181.6	2042.48	-2.69014	0.0175064	Aldehyde dehydrogenase [Source:UniProtKB/TrEMBL;Acc:Q0DZ46]	qAG2, Septiningsih et al., 2013
LOC_Os02g51890	OS02G0755400	2	31781578	31787144	210.021	1148.49	2.45113	0.0767225	284.427	545.252	0.938866	0.460275	781.435	2419.71	1.63064	0.200992	552.645	4522.61	3.03273	0.0196205	598.394	1178.19	0.977398	0.44072	280.115	2151.56	2.94129	0.0240874	Os02g0755400 protein; cDNA clone:002-101-G04, full insert sequence [Source:UniProtKB/TrEMBL;Acc:Q0DXG2]
LOC_Os02g57120	OS02G0816300	2	34982175	34989869	26566.9	7291.36	-1.86537	0.118747	6344.91	8926.45	0.492487	0.653973	678.743	756.455	0.156389	0.891373	560.654	7146.05	3.67196	0.00168165	5263.87	3094.47	-0.76643	0.494998	19215.5	2992.58	-2.68281	0.0172417	Os02g0816300 protein [Source:UniProtKB/TrEMBL;Acc:Q0DWG3]
LOC_Os02g58214	OS02G0829000	2	35633824	35636782	1875.5	1943.39	0.0513	1	1297.11	789.309	-0.716642	0.578629	451.843	300.096	-0.590399	0.647959	265.453	1857.88	2.80713	0.0359505	903.425	197.651	-2.19245	0.10865	1150	148.155	-2.95645	0.0291642
LOC_Os03g02530	OS03G0116400	3	932241	934775	433.26	1423.5	1.71614	0.224095	295.366	504.576	0.772567	0.552514	951.609	2312.57	1.28106	0.322926	227.694	2330.9	3.35572	0.0128391	351.703	1419.07	2.01252	0.130882	283.926	1921.59	2.75871	0.0370651	Membrane protein, putative, expressed; Os03g0116400 protein; cDNA clone:006-307-C10, full insert sequence [Source:UniProtKB/TrEMBL;Acc:Q10SN4]
LOC_Os03g04660	OS03G0140200	3	2211807	2213793	6576.75	2654.88	-1.30873	0.300833	2672.36	1801.37	-0.569024	0.626619	103.67	257.479	1.31246	0.280051	223.117	1185.5	2.40963	0.0453013	2809.45	1210.61	-1.21455	0.318427	4021.66	542.498	-2.8901	0.0186672	Os03g0140200 protein [Source:UniProtKB/TrEMBL;Acc:Q0DVA6]
LOC_Os03g10640	OS03G0203700	3	5433914	5440324	436.198	2391.16	2.45466	0.0814694	57.8231	166.578	1.52648	0.255112	1875.83	1885.81	0.00765182	1	408.477	3229.76	2.9831	0.0242338	157.516	288.756	0.874351	0.503155	1498.71	210.071	-2.83478	0.0324388	Calcium-transporting ATPase 2, plasma membrane-type, putative, expressed; Os03g0203700 protein; cDNA clone:J023087M18, full insert sequence; cDNA clone:J023101G05, full insert sequence [Source:UniProtKB/TrEMBL;Acc:Q10QA3]
LOC_Os03g12900	OS03G0231700	3	6950861	6957390	537.537	1613.48	1.58574	0.238267	698.565	1541.82	1.14216	0.354358	458.689	2265.81	2.30444	0.0685159	360.421	2177.55	2.59495	0.0375351	602.561	2345.56	1.96075	0.122092	345.857	5039.48	3.86503	0.00343248	Os03g0231700 protein; Squalene monooxygenase, putative, expressed; cDNA clone:J033045D18, full insert sequence [Source:UniProtKB/TrEMBL;Acc:Q10PK5]
LOC_Os03g17250	OS03G0281100	3	9611073	9612943	33.7796	233.035	2.78632	0.184768	25.0046	66.8249	1.41819	0.47308	111.494	340.345	1.61004	0.39096	18.3071	421.119	4.52376	0.0269539	60.8395	299.565	2.29979	0.232952	40.9692	642.742	3.97163	0.045371	Ank repeat PF|00023 containing protein, putative, expressed; Os03g0281100 protein; Putative ankyrin repeat containing protein [Source:UniProtKB/TrEMBL;Acc:Q8H8W7]
LOC_Os03g55640	OS03G0765200	3	31682120	31685051	1418.74	370.811	-1.93586	0.179088	1472.14	1225.12	-0.264992	0.836472	1000.51	283.523	-1.8192	0.175852	994.303	146.271	-2.76504	0.0415402	1270.13	538.908	-1.23686	0.362955	1359.61	191.643	-2.82669	0.0382376	Signal peptidase I family protein, expressed [Source:UniProtKB/TrEMBL;Acc:Q10EN6]
LOC_Os06g35560	OS06G0548200	6	20751199	20752955	16.1555	93.6445	2.53517	0.36678	10.9395	4.84238	-1.17576	0.712644	3.91206	85.2343	4.44543	0.107697	0	64.8783	Inf	0.0311364	7.50076	106.546	3.8283	0.150282	7.62219	430.46	5.81953	0.0354387	Os06g0548200 protein; Putative CPRD2 [Source:UniProtKB/TrEMBL;Acc:Q5Z7I5]
LOC_Os10g26340	OS10G0403000	10	13658790	13660543	11.7494	87.7245	2.90039	0.287252	10.9395	32.9282	1.58978	0.539178	8.80214	232.027	4.72029	0.069518	1.14419	119.14	6.70219	0.0283195	58.3393	298.021	2.35287	0.322857	0.952773	112.775	6.8871	0.0251405	Cytochrome P450 78A11 [Source:UniProtKB/Swiss-Prot;Acc:Q7Y1V5]
LOC_Os10g34480	OS10G0486100	10	18390302	18394392	6337.35	1137.73	-2.47773	0.07249	851.718	650.816	-0.388125	0.751317	118.34	71.6205	-0.724492	0.567199	120.14	803.312	2.74124	0.0322832	692.571	163.68	-2.08109	0.110309	4578.08	368.545	-3.63483	0.00616284	Cytochrome P450 family protein, expressed; Putative cytochrome P450 protein [Source:UniProtKB/TrEMBL;Acc:Q8W372]
LOC_Os10g41550	OS10G0565200	10	22326723	22327664	1130.88	1281.96	0.180903	0.9272	636.054	309.913	-1.03729	0.429241	3215.72	578.883	-2.4738	0.0688784	1918.81	305.518	-2.65088	0.0474897	461.714	239.343	-0.947919	0.48623	591.672	67.8123	-3.12518	0.0233548
LOC_Os12g02310	OS12G0115000	12	733276	733623	77707.8	46628.5	-0.736847	0.539445	38097.6	27883.4	-0.450292	0.69394	4420.63	2196.56	-1.00901	0.385834	3258.66	29030.1	3.1552	0.00933965	14579.8	3117.64	-2.22545	0.0670903	43891.4	8552.45	-2.35953	0.0462603	Non-specific lipid-transfer protein 2B [Source:UniProtKB/Swiss-Prot;Acc:Q2QYL2]
DE genes specifically regulated in two extremely high tolerant genotypes 8391, 8753
LOC_Os01g02930	OS01G0119000	1	1078565	1081597	74.9026	168.991	1.17386	0.56688	31.2557	122.997	1.97643	0.284616	49.8788	510.814	3.3563	0.0728155	21.7397	253.615	3.54424	0.0581227	39.1707	1077.82	4.78219	0.0163563	16.1971	426.775	4.71966	0.0164329	Os01g0119000 protein; Putative HGA6; cDNA clone:001-205-C08, full insert sequence [Source:UniProtKB/TrEMBL;Acc:Q9FTE0]
LOC_Os01g04800	OS01G0141000	1	2202278	2203787	1070.67	2490.19	1.21775	0.37215	364.129	1265.8	1.79753	0.153367	864.566	2903.29	1.74764	0.164063	694.525	2336.8	1.75044	0.151429	130.013	2855.13	4.45683	0.00144551	158.16	1731.42	3.4525	0.00843802	AP2/ERF and B3 domain-containing protein Os01g0141000 [Source:UniProtKB/Swiss-Prot;Acc:Q9AWS0]
LOC_Os01g33160	OS01G0516200	1	18259513	18267127	741.683	49.5132	-3.90492	0.0937408	185.971	70.6988	-1.39532	0.496338	22.4944	1.77572	-3.66309	0.136804	34.3258	14.1553	-1.27795	0.554659	85.0087	1.54415	-5.78273	0.0391569	363.007	8.84508	-5.35898	0.0218244	Os01g0516200 protein [Source:UniProtKB/TrEMBL;Acc:C7IWT9]
LOC_Os01g41770	OS01G0601675	1	23639654	23642878	20.5615	172.758	3.07073	0.129985	43.758	111.375	1.3478	0.461802	59.659	695.489	3.54322	0.0599999	40.0467	443.532	3.46928	0.0606489	29.1696	846.194	4.85845	0.0154683	19.0555	288.939	3.92249	0.0397531	HcrVf1 protein-like; Os01g0601675 protein; Uncharacterized protein [Source:UniProtKB/TrEMBL;Acc:Q8S1D2]	qAG1-2, Angaji et al., 2010
LOC_Os01g53090	OS01G0731100	1	30512281	30513627	230.583	11.8401	-4.28353	0.149594	67.1998	17.4326	-1.94667	0.46698	47.9228	0.591905	-6.3392	0.0635058	60.6422	1.17961	-5.68394	0.0882985	85.0087	0	-10000000000	0.0486101	76.2219	0.73709	-6.69222	0.0481495	Os01g0731100 protein; Putative infection-related protein; Uncharacterized protein; cDNA clone:001-206-D09, full insert sequence; cDNA clone:006-303-D12, full insert sequence; cDNA clone:006-308-E01, full insert sequence [Source:UniProtKB/TrEMBL;Acc:Q94EA4]	qAG1-2, Angaji et al., 2010
LOC_Os01g53430	OS01G0736100	1	30694936	30696704	8.81208	143.696	4.02739	0.106408	14.0651	40.676	1.53206	0.506069	16.6263	301.872	4.1824	0.0685104	40.0467	264.232	2.72205	0.198086	7.50076	265.594	5.14604	0.0340072	2.85832	358.963	6.97252	0.00784366	Os01g0736100 protein; Putative UDP-glycose:flavonoid glycosyltransferase; cDNA clone:002-107-A05, full insert sequence; cDNA clone:J033048K03, full insert sequence; cDNA clone:J033126K03, full insert sequence [Source:UniProtKB/TrEMBL;Acc:Q942B6]	qAG1-2, Angaji et al., 2010
LOC_Os01g69830	OS01G0922600	1	40332266	40335625	1164.66	738.393	-0.657452	0.617489	1267.42	661.47	-0.938147	0.467173	1758.47	557.575	-1.65709	0.206997	1020.62	877.627	-0.217765	0.862453	1010.1	151.327	-2.73877	0.047268	2172.32	205.648	-3.40099	0.0131247	Squamosa promoter-binding-like protein 2 [Source:UniProtKB/Swiss-Prot;Acc:Q0JGI1]
LOC_Os01g73200	OS01G0963000	1	42441660	42442936	190.928	517.198	1.43768	0.454009	1.56279	4.84238	1.6316	0.707295	247.438	713.246	1.52733	0.374155	34.3258	227.664	2.72954	0.119377	15.8349	528.099	5.05962	0.0103948	46.6859	608.836	3.705	0.0408676	Class III peroxidase 22; Os01g0963000 protein; Putative peroxidase; Uncharacterized protein; cDNA clone:006-208-A02, full insert sequence; cDNA clone:J033086I12, full insert sequence [Source:UniProtKB/TrEMBL;Acc:Q94DM2]
LOC_Os02g36550	OS02G0575200	2	22068014	22070683	3078.35	711.483	-2.11326	0.13753	1270.54	860.007	-0.563026	0.65991	446.953	79.3153	-2.49445	0.0657235	288.336	659.4	1.1934	0.347299	1138.45	163.68	-2.79812	0.0429207	2683.01	190.906	-3.81292	0.00629202	Os02g0575200 protein; Putative chain A, crystal structure of phosphopantothenoylcysteine synthetase; cDNA clone:J023021M06, full insert sequence [Source:UniProtKB/TrEMBL;Acc:Q69S81]	qAG2-1, Angaji et al., 2010
LOC_Os02g58210	OS02G0828900	2	35624137	35630750	503.757	2278.15	2.17706	0.109139	461.022	584.96	0.343503	0.786591	352.086	1982.29	2.49317	0.0530615	280.327	1018	1.86055	0.131618	555.057	3719.85	2.74454	0.0369326	414.456	4056.2	3.29084	0.011669	Putative DNA-binding protein PD3, chloroplast [Source:UniProtKB/TrEMBL;Acc:Q6K7N9]
LOC_Os03g05334	OS03G0146800	3	2609009	2609572	290.798	29.6003	-3.29634	0.148546	229.729	86.1944	-1.41427	0.485212	62.593	8.87858	-2.8176	0.193564	59.498	49.5435	-0.264147	0.904395	412.542	3.0883	-7.06159	0.00781346	403.023	2.21127	-7.50984	0.00385924
LOC_Os03g16170	OS03G0268600	3	8921424	8923437	58.7472	158.765	1.4343	0.5215	129.711	44.5499	-1.54181	0.431662	463.579	120.157	-1.9479	0.316256	647.613	125.038	-2.37276	0.21626	37.5038	0	-10000000000	0.039177	191.507	3.68545	-5.69942	0.0130937	Probable protein phosphatase 2C 30 [Source:UniProtKB/Swiss-Prot;Acc:Q84JI0]
LOC_Os03g29150	OS03G0404800	3	16551354	16561430	405.355	51.1278	-2.98701	0.203592	415.701	101.69	-2.03137	0.34102	4.89008	3.55143	-0.461457	0.931995	8.00935	73.1356	3.19082	0.162479	45.0046	0	-10000000000	0.0440398	279.163	0	-10000000000	0.00164999	NAD dependent epimerase/dehydratase family protein, expressed; Os03g0404800 protein; cDNA clone:J013032A17, full insert sequence [Source:UniProtKB/TrEMBL;Acc:Q10JX4]	qAG3, Baltazar et al., 2014
LOC_Os03g32050	OS03G0434800	3	18325248	18332522	33.7796	120.016	1.829	0.41185	14.0651	194.664	3.7908	0.0766843	43.0327	137.322	1.67406	0.396786	12.5861	107.344	3.09234	0.130732	19.1686	592.953	4.9511	0.0244699	16.1971	692.127	5.41723	0.0139185	Putative uncharacterized protein [Source:UniProtKB/TrEMBL;Acc:B9F973]	qAG3, Baltazar et al., 2014
LOC_Os03g44540	OS03G0647600	3	25069214	25074703	726.996	179.216	-2.02025	0.207084	1681.56	399.981	-2.07179	0.165687	561.381	174.612	-1.68483	0.256466	519.463	147.451	-1.81679	0.211881	704.238	63.3101	-3.47556	0.030117	518.309	61.9155	-3.06544	0.0452147	CCAAT-binding transcription factor subunit B family protein, expressed; CCAAT-box transcription factor-related; HAP2 subunit of HAP complex; Os03g0647600 protein; cDNA clone:002-102-F12, full insert sequence [Source:UniProtKB/TrEMBL;Acc:Q60DJ8]
LOC_Os03g48540	OS03G0691800	3	27669017	27674441	368.638	1809.38	2.29522	0.106971	101.581	491.986	2.27599	0.0920094	593.656	2608.53	2.13554	0.108585	354.7	990.869	1.4821	0.244659	205.021	2254.46	3.45894	0.0141939	170.546	1724.05	3.33757	0.0146652	HIPL1 protein, putative, expressed; Os03g0691800 protein; Putative HIPL1 protein [Source:UniProtKB/TrEMBL;Acc:Q6AV51]	qAG3-1, Angaji et al., 2010
LOC_Os03g59440	OS03G0809000	3	33834638	33835499	0	35.5203	Inf	0.10607	0	0.968477	Inf	1	8.80214	55.6391	2.66017	0.322839	6.86515	50.7231	2.88528	0.28168	0	302.653	Inf	0.00711325	0	224.812	Inf	0.00976879	Dirigent-like protein, expressed; Os03g0809000 protein; Putative dirigent-like protein; cDNA clone:J023132M14, full insert sequence [Source:UniProtKB/TrEMBL;Acc:Q6ATP8]
LOC_Os03g63540	OS03G0852400	3	35895803	35896803	2294.08	644.748	-1.83111	0.207926	1701.87	1131.18	-0.589294	0.655014	335.459	100.624	-1.73717	0.204015	197.945	276.028	0.479712	0.715239	1240.96	149.782	-3.05052	0.0338119	1145.23	138.573	-3.04692	0.029104	Expressed protein; Os03g0852400 protein; Putative uncharacterized protein OSJNBa0015N08.26; cDNA clone:006-203-B05, full insert sequence [Source:UniProtKB/TrEMBL;Acc:Q851X5]
LOC_Os04g24110	OS04G0305700	4	13771472	13773274	1411.4	185.136	-2.93047	0.120429	92.2043	67.7934	-0.44369	0.79979	114.428	25.4519	-2.16859	0.21743	9.15354	44.825	2.2919	0.214379	81.675	1.54415	-5.72501	0.0170036	1092.83	66.3381	-4.04209	0.0264995	OSJNBa0023J03.6 protein; cDNA clone:001-201-C02, full insert sequence; cDNA clone:J013130C23, full insert sequence [Source:UniProtKB/TrEMBL;Acc:Q7XVP1]
LOC_Os04g26870	OS04G0337500	4	15888816	15893913	4119.65	699.643	-2.55783	0.0608245	2325.42	1080.82	-1.10537	0.366098	483.14	182.307	-1.40607	0.256848	704.822	462.406	-0.608101	0.609453	1721.01	254.785	-2.7559	0.0342463	5325.05	485.742	-3.45453	0.00780512	Probable aldo-keto reductase 1 [Source:UniProtKB/Swiss-Prot;Acc:Q0JE32]
LOC_Os04g33450	OS04G0408600	4	20221253	20223066	6424	1046.24	-2.61826	0.0594513	1065.82	1047.89	-0.0244736	0.981476	311.009	75.172	-2.04869	0.111902	109.842	294.902	1.4248	0.250419	1289.3	149.782	-3.10565	0.0206718	3408.07	324.319	-3.39347	0.0100038	Os04g0408600 protein; cDNA clone:J023139O07, full insert sequence [Source:UniProtKB/TrEMBL;Acc:Q84VA6]
LOC_Os04g34600	OS04G0423400	4	20934960	20936052	1173.47	702.872	-0.739452	0.591945	246.92	253.741	0.0393118	0.985266	1176.55	203.023	-2.53485	0.0714205	906.2	1802.44	0.992048	0.449104	403.374	37.0596	-3.4442	0.0214393	1893.16	18.4272	-6.68281	5.88e-05	OSJNBb0088C09.10 protein; Os04g0423400 protein [Source:UniProtKB/TrEMBL;Acc:Q7XJY1]
LOC_Os04g57320	OS04G0668900	4	34122909	34125915	190.928	801.36	2.06942	0.188679	95.3299	197.569	1.05136	0.47305	198.537	793.745	1.99927	0.170917	255.155	1131.24	2.14846	0.131377	102.51	906.415	3.1444	0.040261	156.255	1762.38	3.49555	0.0204579	Ubiquinol oxidase [Source:UniProtKB/TrEMBL;Acc:O82522]
LOC_Os05g10370	OS05G0192100	5	5652659	5654777	514.038	1255.05	1.2878	0.369869	1026.75	399.012	-1.36358	0.294818	1663.6	320.221	-2.37717	0.0759726	717.409	1573.59	1.1332	0.368529	2859.46	13.8973	-7.68479	6.52e-06	1396.77	6.63381	-7.71804	5.01e-06	Putative uncharacterized protein B1140B01.15; cDNA clone:006-306-A01, full insert sequence [Source:UniProtKB/TrEMBL;Acc:Q60DS2]	qAG5, Jiang et al., 2006
LOC_Os05g32150	OS05G0387300	5	18742852	18743489	5.87472	138.852	4.56289	0.134473	0	10.6532	Inf	0.267529	8.80214	20.7167	1.23487	0.659454	2.28838	116.781	5.67333	0.0614066	1.66684	129.709	6.28202	0.0461878	1.90555	251.348	7.04334	0.0253317	Os05g0387300 protein; Putative uncharacterized protein OSJNBa0073E05.11; cDNA clone:001-027-D06, full insert sequence [Source:UniProtKB/TrEMBL;Acc:Q60E65]	qAG5, Jiang et al., 2004
LOC_Os05g37130	OS05G0443400	5	21699330	21703558	1160.26	182.445	-2.66891	0.101729	809.523	352.526	-1.19934	0.412194	102.692	86.4182	-0.248913	0.867207	60.6422	242.999	2.00256	0.175293	656.734	37.0596	-4.14739	0.0119676	1990.34	83.2911	-4.57871	0.00481118		qAG5, Jiang et al., 2004
LOC_Os05g41610	OS05G0495900	5	24371216	24374660	1167.6	930.525	-0.327429	0.807983	276.613	448.405	0.696932	0.639606	382.404	89.3777	-2.09711	0.164697	195.657	769.103	1.97485	0.176541	303.364	29.3388	-3.37017	0.0382539	988.026	103.193	-3.25921	0.0343454	'putative beta-1,3-glucanase'; Os05g0495900 protein; cDNA clone:J023011M23, full insert sequence [Source:UniProtKB/TrEMBL;Acc:Q65X69]
LOC_Os06g02900	OS06G0119600	6	1063563	1066532	2778.74	987.035	-1.49326	0.261101	2539.53	1138.93	-1.15688	0.348969	672.875	162.182	-2.05272	0.106508	278.039	648.783	1.22245	0.313551	3459.52	355.154	-3.28405	0.0138015	3000.28	527.756	-2.50715	0.0469872	Os06g0119600 protein; Putative nucleoid DNA-binding protein cnd41; cDNA clone:001-036-C01, full insert sequence; cDNA clone:J013067G18, full insert sequence [Source:UniProtKB/TrEMBL;Acc:Q5VPQ6]
LOC_Os06g02960	OS06G0120200	6	1090058	1092625	227.645	11.8401	-4.26503	0.0653894	640.742	174.326	-1.87796	0.345338	96.8236	10.0624	-3.26639	0.126005	106.41	80.2132	-0.40772	0.836923	145.015	3.0883	-5.55324	0.0279361	282.021	0.73709	-8.57975	0.00213426	Os06g0120200 protein; Putative uncharacterized protein P0660D08.21; cDNA clone:J013050O22, full insert sequence [Source:UniProtKB/TrEMBL;Acc:Q5VQ96]
LOC_Os06g28194	OS06G0476200	6	16011333	16032779	289.33	51.666	-2.48543	0.344673	26.5674	32.9282	0.30967	0.923648	9.78016	3.55143	-1.46146	0.613454	10.2977	29.4902	1.51791	0.553286	70.0071	0	-10000000000	0.0449031	274.399	5.15963	-5.73286	0.0398083	Os06g0476200 protein; Putative phosphomannomutase [Source:UniProtKB/TrEMBL;Acc:Q69TT2]
LOC_Os06g44610	OS06G0656300	6	26937180	26940953	1926.91	638.828	-1.59279	0.268815	1376.81	1649.32	0.260534	0.848876	361.866	352.775	-0.0367047	0.975415	157.899	622.832	1.97985	0.139145	855.087	117.355	-2.86519	0.0453875	1165.24	167.319	-2.79995	0.0427007	CASP-like protein Os06g0656300 [Source:UniProtKB/Swiss-Prot;Acc:Q67W83]
LOC_Os06g49660	OS06G0710700	6	30051761	30053353	872.395	71.5789	-3.60738	0.113321	121.897	153.988	0.33715	0.875247	11.7362	73.9881	2.65633	0.220306	5.72096	5.89803	0.0439758	1	48.3383	0	-10000000000	0.0335732	291.549	5.89672	-5.62768	0.0167276	Os06g0710700 protein; Putative benzoyl coenzyme A, benzyl alcohol benzoyl transferase [Source:UniProtKB/TrEMBL;Acc:Q5Z9G3]
LOC_Os07g05700	OS07G0151800	7	2721785	2723535	41.123	159.303	1.95376	0.324754	310.994	377.706	0.280375	0.876955	168.219	380.003	1.17567	0.503003	637.315	436.454	-0.546176	0.743477	8.33418	177.577	4.41326	0.0277767	6.66941	184.272	4.78814	0.0169526	Os07g0151800 protein; Putative uncharacterized protein B1364A02.14; Putative uncharacterized protein OJ1048_C10.15; cDNA clone:001-118-G04, full insert sequence [Source:UniProtKB/TrEMBL;Acc:Q7XIY3]
LOC_Os07g18162	OS07G0282500	7	10765848	10767128	1618.48	243.799	-2.73088	0.154096	0	1.93695	Inf	0.821695	9.78016	8.28667	-0.239065	0.948321	0	4.71842	Inf	0.294318	285.862	7.72074	-5.21044	0.0127628	695.524	57.493	-3.59664	0.0492696	Aldehyde oxidase-like [Source:UniProtKB/TrEMBL;Acc:Q6Z5T5]	qAG7.1, Septiningsih et al., 2013; qAG7, Baltazar et al., 2014
LOC_Os07g35410	OS07G0538700	7	21175222	21178518	64.6219	159.842	1.30655	0.533168	18.7534	125.902	2.74707	0.158822	62.593	220.189	1.81467	0.325271	49.2003	574.468	3.54549	0.0611288	8.33418	498.76	5.90316	0.00656149	36.2054	711.292	4.29616	0.0286172	Putative uncharacterized protein [Source:UniProtKB/TrEMBL;Acc:A3BKQ5]
LOC_Os07g44450	OS07G0638500	7	26554538	26555577	16.1555	128.089	2.98705	0.26022	4.68836	5.81086	0.30967	1	83.1313	81.091	-0.0358506	0.987408	5.72096	89.6501	3.96998	0.117209	4.16709	339.713	6.34913	0.0225114	2.85832	254.296	6.4752	0.020712	Os07g0638500 protein; Putative disease resistance response protein; cDNA clone:002-153-F03, full insert sequence [Source:UniProtKB/TrEMBL;Acc:Q8GVG8]	qAG7-2, Angaji et al., 2010
LOC_Os08g06280	OS08G0159500	8	3460765	3463758	3561.55	3609.62	0.0193429	1	2500.46	4916.96	0.975574	0.384061	1226.43	2599.06	1.08352	0.33581	1711.71	5973.53	1.80314	0.103397	2159.39	10588.2	2.29377	0.049731	1948.42	9719.27	2.31854	0.0408144	Protein LSD1 [Source:UniProtKB/Swiss-Prot;Acc:Q0J7V9]
LOC_Os08g28790	OS08G0375400	8	17613571	17614371	762.245	51.1278	-3.89808	0.0810474	204.725	86.1944	-1.24802	0.523791	95.8455	5.32715	-4.16928	0.0586798	21.7397	38.927	0.840442	0.68311	176.685	3.0883	-5.83822	0.0200371	418.267	0.73709	-9.14837	0.0010859	Disease resistance response protein-like; Os08g0375400 protein; cDNA clone:002-140-B09, full insert sequence [Source:UniProtKB/TrEMBL;Acc:Q6ZDJ2]
LOC_Os08g33300	OS08G0429800	8	20761382	20764018	0	27.9857	Inf	0.167537	6.25114	5.81086	-0.105368	1	0	53.2715	Inf	0.0624359	0	58.9803	Inf	0.0613526	0.833418	168.312	7.65788	0.0405095	0	108.352	Inf	0.0327921
LOC_Os08g43320	OS08G0546700	8	27376052	27378939	5350.4	1020.94	-2.38975	0.0586931	7099.73	3128.18	-1.18244	0.299273	1879.75	580.659	-1.69478	0.143283	1754.05	897.68	-0.966414	0.38331	5850.6	1111.79	-2.3957	0.0447995	7628.86	1309.07	-2.54292	0.0291198	Os08g0546700 protein; Putative membrane protein; cDNA clone:006-205-H06, full insert sequence [Source:UniProtKB/TrEMBL;Acc:Q6ZFV7]
LOC_Os09g03939	OS09G0125900	9	2007493	2021289	1984.19	254.562	-2.96246	0.0678679	564.166	530.725	-0.0881534	0.948707	35.2086	4.73524	-2.89442	0.0813976	48.0561	209.97	2.12739	0.147992	212.522	13.8973	-3.93473	0.0185784	2205.67	69.2864	-4.9925	0.0022489	ABC transporter-like protein; Os09g0125900 protein; cDNA clone:J013034I10, full insert sequence [Source:UniProtKB/TrEMBL;Acc:Q6K376]	qAG9-1, Angaji et al., 2010
LOC_Os10g21268	OS10G0356000	10	10861205	10862638	409.762	107.099	-1.93584	0.153201	265.674	141.398	-0.909897	0.464879	68.4611	78.7234	0.201508	0.886013	144.168	218.227	0.598077	0.623224	4991.34	131.253	-5.24901	0.000261117	9256.19	1398.26	-2.72679	0.0311701	Ribulose bisphosphate carboxylase large chain [Source:UniProtKB/Swiss-Prot;Acc:P0C512]
LOC_Os10g22570	OS10G0370800	10	11698993	11713558	625.657	1511.23	1.27228	0.378338	242.232	630.478	1.38006	0.296533	234.724	1468.52	2.64532	0.0517317	218.541	938.966	2.10317	0.106994	465.047	3824.86	3.03996	0.0291461	7.62219	1136.59	7.22029	1.6e-05	Cellulase containing protein, expressed; Os10g0370800 protein; Putative Glucan 1,3-beta-glucosidase [Source:UniProtKB/TrEMBL;Acc:Q8RU51]
LOC_Os10g31040	OS10G0447900	10	16225413	16238841	4923.01	1400.9	-1.81319	0.18019	1898.78	1204.79	-0.6563	0.593747	331.547	81.6829	-2.02111	0.115859	213.964	569.75	1.41296	0.249829	1732.68	251.696	-2.78325	0.0354411	2737.32	336.113	-3.02574	0.0196101	Putative uncharacterized protein [Source:UniProtKB/TrEMBL;Acc:A3C592]
LOC_Os10g36100	OS10G0504900	10	19303783	19304325	411.23	135.623	-1.60034	0.482347	29.6929	97.8162	1.71995	0.445777	45.9667	2.95953	-3.95715	0.109799	33.1816	57.8007	0.800705	0.714413	205.854	1.54415	-7.05867	0.0173643	247.721	2.21127	-6.8077	0.0115515	Nonspecific lipid-transfer protein 2, putative, expressed; Os10g0504900 protein [Source:UniProtKB/TrEMBL;Acc:Q337E3]
LOC_Os10g39840	OS10G0545500	10	21320574	21322000	417.105	326.68	-0.352534	0.813255	40.6324	145.272	1.83805	0.282411	39.1206	67.4772	0.78647	0.647467	40.0467	175.761	2.13386	0.197764	24.1691	1286.28	5.73389	0.00311554	95.2773	995.808	3.38566	0.0483156
LOC_Os10g40614	OS10G0554800	10	21786115	21787034	315.766	1263.66	2.00068	0.112881	3269.35	3594.99	0.136983	0.908603	2686.61	5958.12	1.14907	0.321937	2585.87	3833.72	0.568093	0.609397	1056.77	5983.58	2.50134	0.0391767	262.013	2167.78	3.04851	0.0113153
LOC_Os10g40700	OS10G0555600	10	21830158	21831694	420.042	1361.61	1.69671	0.228437	268.799	1084.69	2.01269	0.125767	762.852	701.408	-0.121151	0.920714	121.284	534.362	2.13942	0.0977374	265.86	2870.57	3.4326	0.0136996	570.711	3702.4	2.69763	0.0402633	Expansin-B6 [Source:UniProtKB/Swiss-Prot;Acc:Q7XCA7]
LOC_Os10g42610	OS10G0576600	10	22964272	22965575	522.85	3061.75	2.54989	0.0532376	525.096	1658.03	1.65882	0.174019	1804.44	2891.46	0.680246	0.573506	1351.29	2579.8	0.93292	0.423272	374.205	2277.62	2.60563	0.0402082	263.918	4023.04	3.93012	0.00251248	Expressed protein; cDNA clone:001-009-A12, full insert sequence [Source:UniProtKB/TrEMBL;Acc:Q336P1]
LOC_Os11g05700	OS11G0155600	11	2605752	2614119	559.567	640.443	0.194759	0.929887	276.613	486.175	0.813608	0.570864	187.779	1380.32	2.8779	0.0535523	199.089	1036.87	2.38075	0.0962339	71.674	923.401	3.68744	0.0180565	81.9385	879.348	3.42382	0.0227252
LOC_Os11g15230	OS11G0258900	11	8597091	8598972	205.615	850.874	2.049	0.152921	3.12557	0	-10000000000	0.398106	317.855	1860.95	2.5496	0.0595617	260.876	1112.37	2.0922	0.108056	395.04	4544.43	3.52403	0.0128771	228.666	1599.48	2.8063	0.0366578
LOC_Os11g33270	OS11G0539200	11	19675012	19677815	179.179	1261.51	2.81568	0.0570787	135.962	160.767	0.241765	0.867995	615.172	1670.95	1.44161	0.285647	228.838	1259.82	2.46082	0.0686995	265.86	3128.45	3.5567	0.0145189	85.7496	607.362	2.82435	0.0414269	Os11g0539200 protein; Xyloglucan endotransglucosylase/hydrolase, putative, expressed; cDNA clone:J023105D14, full insert sequence [Source:UniProtKB/TrEMBL;Acc:Q2R336]	qAG11, Jiang et al., 2006
LOC_Os11g35540	OS11G0559600	11	20832524	20835844	14.6868	13.9929	-0.0698283	0.982776	0	0	NA	NA	5.86809	0.591905	-3.30945	0.361417	1.14419	0	-10000000000	1	12.5013	704.132	5.8157	0.039382	34.2998	0	-10000000000	0.0411794		qAG11, Jiang et al., 2006
LOC_Os11g36150	OS11G0569500	11	21250919	21254683	340.734	399.335	0.228954	0.910717	128.148	483.27	1.91501	0.18174	245.482	1216.37	2.30889	0.108651	210.531	750.229	1.8333	0.185018	112.511	1487.02	3.72428	0.0150132	167.688	1840.51	3.45626	0.0190633	Os11g0569500 protein; Receptor kinase, putative, expressed [Source:UniProtKB/TrEMBL;Acc:Q2R2D8]	qAG11, Jiang et al., 2006
LOC_Os11g42490	OS11G0644600	11	25589890	25591645	1114.73	85.0335	-3.71252	0.0799019	139.088	62.951	-1.1437	0.543529	71.3952	37.8819	-0.914316	0.628636	33.1816	3.53882	-3.22904	0.144194	220.022	9.26489	-4.56973	0.0362799	440.181	12.5305	-5.13458	0.0152717	Retrotransposon protein, putative, unclassified, expressed [Source:UniProtKB/TrEMBL;Acc:Q2R0I2]	qAG11, Jiang et al., 2006; qAG11, Baltazar et al., 2014
LOC_Os12g10220	OS12G0203200	12	5399052	5401325	63.1532	534.42	3.08105	0.103301	79.7021	344.778	2.11298	0.223605	47.9228	256.887	2.42235	0.166995	37.7583	333.829	3.14424	0.0733553	16.6684	846.194	5.6658	0.0045564	36.2054	664.855	4.19876	0.0220564	Expressed protein; Os12g0203200 protein; cDNA clone:001-111-H07, full insert sequence [Source:UniProtKB/TrEMBL;Acc:Q2QW85]
LOC_Os12g10580	OS12G0207600	12	5614140	5615573	199.74	42.5168	-2.23202	0.151424	78.1393	51.3293	-0.606266	0.680066	27.3844	32.5548	0.249513	0.888235	58.3538	66.0579	0.178905	0.911474	1961.87	94.1931	-4.38046	0.0052481	4199.82	571.982	-2.87629	0.0453127
LOC_Os12g42610	OS12G0621100	12	26477638	26487296	681.467	2053.72	1.59152	0.227533	456.333	952.013	1.06089	0.382116	956.499	3301.06	1.78709	0.144793	567.519	2801.56	2.30349	0.0573655	545.056	4797.67	3.13786	0.0153358	525.931	3358.18	2.67473	0.0304799	Protein YABBY 6 [Source:UniProtKB/Swiss-Prot;Acc:Q2QM17]	qAG12, Septiningsih et al., 2013
DE genes specifically regulated in Nipponbare
LOC_Os01g02870	OS01G0135700	1	1931016	1931904	6268.32	994.57	-2.65594	0.0448359	664.184	1815.89	1.45103	0.226245	606.37	420.253	-0.528941	0.65253	406.188	754.948	0.894229	0.438898	2380.24	6171.96	1.37462	0.254822	2143.74	1529.46	-0.487106	0.672354	Probable calcium-binding protein CML16 [Source:UniProtKB/Swiss-Prot;Acc:Q5ZCK5]
LOC_Os01g04330	OS01G0138800	1	2071843	2073609	198.272	1864.82	3.23348	0.0203004	48.4464	67.7934	0.484756	0.728702	2148.7	2665.35	0.31086	0.80662	906.2	4953.17	2.45045	0.0521143	49.1717	58.6777	0.254984	0.857905	1747.39	715.714	-1.28774	0.294306	Os01g0138800 protein; Putative uncharacterized protein P0443D08.44 [Source:UniProtKB/TrEMBL;Acc:Q5ZC52]
LOC_Os01g04620	OS01G0205200	1	5764652	5766659	0	178.14	Inf	0.0240542	0	0	NA	NA	96.8236	109.502	0.177533	0.951462	43.4793	165.145	1.92533	0.436348	1.66684	12.3532	2.8897	0.382209	39.0637	26.5352	-0.55792	0.82918	Os01g0205200 protein; Pentatricopeptide repeat protein-like [Source:UniProtKB/TrEMBL;Acc:Q5QNL7]
LOC_Os01g10800	OS01G0226700	1	7009033	7010446	914.987	80.728	-3.50261	0.0482245	757.951	453.247	-0.741807	0.628669	111.494	121.932	0.129119	0.943687	201.378	122.679	-0.715016	0.639305	520.886	335.08	-0.636462	0.69523	646.933	174.69	-1.88882	0.222723	Os01g0226700 protein; Putative uncharacterized protein P0443E07.29 [Source:UniProtKB/TrEMBL;Acc:Q5NAJ4]
LOC_Os01g12690	OS01G0298400	1	10934895	10935992	36.717	858.408	4.54714	0.0081172	115.646	87.1629	-0.407931	0.787199	1601.01	905.615	-0.822014	0.570077	350.123	1342.39	1.93887	0.181764	89.1758	115.811	0.377051	0.802389	76.2219	177.639	1.22067	0.403049	Os01g0298400 protein; Putative typical P-type R2R3 Myb protein; Uncharacterized protein; cDNA, clone: J065186D02, full insert sequence [Source:UniProtKB/TrEMBL;Acc:Q93V35]	qAG1-1, Angaji et al., 2010
LOC_Os01g19330	OS01G0314800	1	11863682	11864412	0	194.286	Inf	0.0249095	0	0	NA	NA	51.8348	94.1129	0.860471	0.744683	19.4513	171.043	3.13642	0.235855	0.833418	4.63245	2.47466	0.605069	24.7721	47.9108	0.951635	0.713854	Os01g0314800 protein; Uncharacterized protein [Source:UniProtKB/TrEMBL;Acc:Q0JN91]
LOC_Os01g21250	OS01G0329000	1	12677044	12683455	30.8423	701.258	4.50696	0.0328619	7.81393	8.71629	0.157666	1	734.49	226.108	-1.69973	0.349901	102.977	429.377	2.05992	0.251777	14.1681	26.2505	0.889699	0.66877	178.169	16.9531	-3.39363	0.0776036	Os01g0329000 protein [Source:UniProtKB/TrEMBL;Acc:Q0JN44]
LOC_Os01g22560	OS01G0384800	1	16130515	16131331	533.131	8.0728	-6.04528	0.0365091	160.967	59.0771	-1.44609	0.543103	0	2.36762	Inf	0.562558	0	4.71842	Inf	0.382259	22.5023	6.1766	-1.86519	0.520056	54.3081	3.68545	-3.88125	0.142005	Os01g0384800 protein; Putative uncharacterized protein OSJNBb0093M23.18; Uncharacterized protein; cDNA clone:002-157-A09, full insert sequence; cDNA clone:J023034B07, full insert sequence [Source:UniProtKB/TrEMBL;Acc:Q5VNY3]
LOC_Os01g28790	OS01G0582600	1	22604528	22606674	472.915	3804.44	3.00803	0.0200649	70.3254	132.681	0.915849	0.455947	4458.77	4554.12	0.0305247	0.983562	1450.84	4979.12	1.77901	0.124012	305.865	443.171	0.53497	0.649144	2616.32	4639.24	0.826353	0.469257	Putative uncharacterized protein B1097D05.32 [Source:UniProtKB/TrEMBL;Acc:Q8LJ71]	qAG1-2, Angaji et al., 2010
LOC_Os01g40070	OS01G0597600	1	23447173	23448687	718.184	5261.85	2.87315	0.0240651	198.474	228.561	0.203628	0.870082	3472.93	4187.14	0.269809	0.818548	1518.34	4556.82	1.58553	0.163111	738.409	501.848	-0.557168	0.642538	6204.46	4338.51	-0.516106	0.645365	Os01g0597600 protein; Uncharacterized protein [Source:UniProtKB/TrEMBL;Acc:A2ZV22]	qAG1-2, Angaji et al., 2010
LOC_Os01g41420	OS01G0619900	1	24696532	24697792	2.93736	221.733	6.23816	0.0234387	4.68836	47.4554	3.33942	0.178727	133.988	235.578	0.814101	0.700206	171.629	230.023	0.422487	0.834506	4.16709	1.54415	-1.43223	0.816672	228.666	170.268	-0.425434	0.833289		qAG1,Jiang et al., 2004; qAG1-2, Angaji et al., 2010
LOC_Os01g43230	OS01G0628700	1	25114083	25118356	1411.4	72.1171	-4.29064	0.0352142	84.3904	288.606	1.77395	0.324008	34.2306	7.10286	-2.26881	0.237126	25.1722	141.553	2.49143	0.168611	284.196	81.8399	-1.79601	0.328206	284.879	60.4414	-2.23674	0.206241	cDNA, clone: J100002I07, full insert sequence [Source:UniProtKB/TrEMBL;Acc:B7F9W3]	qAG1-2, Angaji et al., 2010
LOC_Os01g43844	OS01G0693400	1	28619585	28621117	487.602	3604.24	2.88592	0.0375833	85.9532	411.603	2.25963	0.0854571	758.94	1899.42	1.3235	0.297048	544.636	3020.97	2.47165	0.051968	500.051	2042.91	2.03048	0.11924	390.637	913.254	1.22519	0.322368	AP2/ERF and B3 domain-containing protein Os01g0693400 [Source:UniProtKB/Swiss-Prot;Acc:Q8RZX9]	qAG1-2, Angaji et al., 2010
LOC_Os01g49830	OS01G0699100	1	28921498	28922922	367.17	4560.06	3.63453	0.00466337	245.357	269.237	0.13399	0.91545	8142.96	3501.71	-1.21749	0.287404	3503.52	9592.56	1.45311	0.194306	568.391	890.974	0.648499	0.571635	2309.52	2748.61	0.251106	0.821728	Os01g0699100 protein [Source:UniProtKB/TrEMBL;Acc:Q0JK37]	qAG1-2, Angaji et al., 2010
LOC_Os01g50370	OS01G0699400	1	28933836	28935191	36.717	986.497	4.74779	0.00696005	12.5023	23.2434	0.894632	0.633749	533.997	516.141	-0.0490645	0.969968	232.271	1535.85	2.72515	0.0730544	24.1691	49.4128	1.03172	0.52561	627.878	709.08	0.175466	0.904846	Os01g0699400 protein [Source:UniProtKB/TrEMBL;Acc:Q0JK36]	qAG1-2, Angaji et al., 2010
LOC_Os01g50400	OS01G0699600	1	28946730	28948045	0	281.472	Inf	0.00179396	3.12557	5.81086	0.894632	0.852122	410.767	69.8448	-2.55609	0.180841	184.215	734.895	1.99615	0.273843	4.16709	7.72074	0.889699	0.776775	448.756	137.099	-1.71072	0.348375	Os01g0699600 protein [Source:UniProtKB/TrEMBL;Acc:Q0JK34]	qAG1-2, Angaji et al., 2010
LOC_Os01g50420	OS01G0720700	1	30043446	30043783	4.40604	2573.07	9.18979	1.63e-06	4.68836	2.90543	-0.69033	0.906219	1469.96	586.578	-1.32538	0.31898	362.709	1979.38	2.44816	0.0677497	15.0015	7.72074	-0.958298	0.62435	1690.22	1327.5	-0.3485	0.786016		qAG1-2, Angaji et al., 2010
LOC_Os01g52260	OS01G0757200	1	31795105	31797640	174.773	2039.19	3.54444	0.0181386	145.339	340.904	1.22994	0.36594	585.831	1561.45	1.41432	0.294287	398.179	2199.97	2.46599	0.0673847	106.678	630.013	2.56212	0.0696256	211.516	1263.37	2.57844	0.058811	Gibberellin 2-oxidase; Os01g0757200 protein; cDNA clone:001-028-C12, full insert sequence; cDNA clone:001-031-D01, full insert sequence; cDNA clone:J033060N07, full insert sequence [Source:UniProtKB/TrEMBL;Acc:Q8S0S6]	qAG1-2, Angaji et al., 2010
LOC_Os01g55240	OS01G0773800	1	32714779	32716649	85.1834	1582.27	4.21528	0.00660997	57.8231	113.312	0.970581	0.493726	1366.29	2744.07	1.00606	0.458063	470.263	1821.31	1.95344	0.144518	149.182	186.842	0.324747	0.811366	66.6941	367.808	2.46332	0.0753721	Uncharacterized protein [Source:UniProtKB/TrEMBL;Acc:B9ETA0]	qAG1-2, Angaji et al., 2010
LOC_Os01g56690	OS01G0816100	1	34692912	34694391	0	284.701	Inf	0.0190428	0	0	NA	NA	40.0986	118.381	1.56181	0.5573	8.00935	110.883	3.79121	0.177031	0	0	NA	NA	4.76387	3.68545	-0.370293	0.975918	NAC domain-containing protein 68 [Source:UniProtKB/Swiss-Prot;Acc:Q52QH4]	qAG1-2, Angaji et al., 2010
LOC_Os01g60020	OS01G0832600	1	35636303	35640933	49.9351	2541.86	5.66969	0.000333099	37.5069	71.6673	0.93416	0.508066	2548.71	1730.14	-0.558879	0.662084	886.749	2406.4	1.44028	0.257667	80.8416	210.004	1.37725	0.306986	197.224	682.545	1.79109	0.168297	Os01g0832600 protein; Putative anthocyanidin synthase; Uncharacterized protein [Source:UniProtKB/TrEMBL;Acc:Q5QLC8]	qAG1-2, Angaji et al., 2010
LOC_Os01g61610	OS01G0841700	1	36135911	36137281	0	173.834	Inf	0.0198289	0	2.90543	Inf	0.671045	292.427	84.6424	-1.78862	0.457249	221.973	17.6941	-3.64905	0.14986	3.33367	4.63245	0.474662	0.986228	4.76387	0	-10000000000	0.274276	Elicitor-responsive protein 1 [Source:UniProtKB/Swiss-Prot;Acc:Q0JHU5]	qAG1-2, Angaji et al., 2010
LOC_Os01g62430	OS01G0845100	1	36296586	36298621	16.1555	559.176	5.11321	0.0283959	1.56279	22.275	3.83323	0.17102	185.823	455.175	1.29249	0.510628	61.7864	293.722	2.24909	0.248485	4.16709	78.7516	4.2402	0.0645483	161.019	42.0141	-1.93828	0.320107	Os01g0845000 protein; Putative Avr9/Cf-9 rapidly elicited protein 137 [Source:UniProtKB/TrEMBL;Acc:Q5N9N9]	qAG1-2, Angaji et al., 2010
LOC_Os01g62670	OS01G0863300	1	37358205	37359556	22.0302	582.318	4.72425	0.0390898	1.56279	17.4326	3.47959	0.225003	139.856	483.587	1.78983	0.364389	26.3164	267.771	3.34696	0.100731	7.50076	72.575	3.27436	0.133606	88.6079	188.695	1.09055	0.567815	Os01g0863300 protein [Source:UniProtKB/TrEMBL;Acc:Q0JHH7]	qAG1-2, Angaji et al., 2010
LOC_Os01g64360	OS01G0868000	1	37590034	37590771	5.87472	682.421	6.86	0.000677946	7.81393	23.2434	1.5727	0.409441	706.127	535.082	-0.400168	0.788229	569.808	1630.22	1.51652	0.309825	17.5018	50.9569	1.54178	0.356379	217.232	325.057	0.581452	0.697937	AP2 domain transcription factor-like; Os01g0868000 protein [Source:UniProtKB/TrEMBL;Acc:Q5N965]	qAG1-2, Angaji et al., 2010
LOC_Os01g64790	OS01G0882000	1	38287883	38289428	29.3736	2794.27	6.57181	5.67e-05	14.0651	85.226	2.59918	0.0763606	1797.59	3569.78	0.989769	0.446083	1094.99	2300.23	1.07086	0.393182	27.5028	94.1931	1.77604	0.201679	34.2998	126.779	1.88605	0.156175	Uncharacterized protein [Source:UniProtKB/TrEMBL;Acc:A3A089]	qAG1-2, Angaji et al., 2010
LOC_Os01g65950	OS01G0882100	1	38290773	38290970	11.7494	392.877	5.06341	0.0323237	12.5023	30.0228	1.26387	0.575687	233.746	725.084	1.63321	0.409704	30.8932	281.926	3.18996	0.117757	10.001	33.9713	1.76417	0.418198	20.0082	53.0705	1.40731	0.48326		qAG1-2, Angaji et al., 2010
LOC_Os01g66120	OS01G0884300	1	38398996	38401481	1461.34	16484.7	3.49577	0.00442025	531.347	941.359	0.825091	0.456365	9728.32	9304.75	-0.0642239	0.948995	6124.86	18764	1.61522	0.135585	585.893	2510.79	2.09943	0.0667087	3058.4	4279.54	0.484679	0.650882	NAC domain-containing protein 48 [Source:UniProtKB/Swiss-Prot;Acc:Q7F2L3]	qAG1-2, Angaji et al., 2010
LOC_Os01g66830					1039.82	128.089	-3.02113	0.038468	2820.83	1598.96	-0.818989	0.521593	845.006	231.435	-1.86835	0.156084	845.558	218.227	-1.95407	0.129403	1648.5	393.758	-2.06577	0.124361	1834.09	383.287	-2.25857	0.0836064
LOC_Os01g67980	OS01G0907600	1	39501378	39502910	0	654.435	Inf	0.00537146	0	0	NA	NA	115.406	2.36762	-5.60713	0.0515538	10.2977	0	-10000000000	0.201269	0	0	NA	NA	1.90555	0.73709	-1.37029	0.899866	Cysteine endopeptidase; Os01g0907600 protein; Putative cysteine proteinase; Uncharacterized protein [Source:UniProtKB/TrEMBL;Acc:Q7F3A8]	qAG1-2, Angaji et al., 2010
LOC_Os01g71090	OS01G0937100	1	41142013	41143416	89.5894	1024.71	3.51574	0.0298936	62.5114	151.082	1.27314	0.392818	279.713	1932.57	2.7885	0.0629487	168.196	1165.45	2.79267	0.0571488	125.846	716.485	2.50928	0.096649	94.3245	575.667	2.60953	0.0762008	Os01g0937100 protein; Putative xylanase inhibitor; cDNA clone:001-203-B07, full insert sequence [Source:UniProtKB/TrEMBL;Acc:Q8S1V0]
LOC_Os01g73770	OS01G0968800	1	42727426	42728261	0	132.394	Inf	0.0325755	0	0	NA	NA	27.3844	91.7453	1.74428	0.501887	10.2977	368.037	5.15945	0.0675257	0	0	NA	NA	9.52773	19.1643	1.00822	0.715236	Dehydration-responsive element-binding protein 1F [Source:UniProtKB/Swiss-Prot;Acc:Q8S9Z5]
LOC_Os02g06930	OS02G0165100	2	3504423	3508658	142.462	1278.73	3.16607	0.0374291	73.4509	147.208	1.00301	0.478745	557.469	1908.89	1.77577	0.200024	291.769	1846.08	2.66157	0.0550336	91.676	338.169	1.88313	0.18443	1169.05	605.888	-0.948218	0.475605	Os02g0165100 protein; Putative receptor protein kinase PERK; cDNA clone:J013073C06, full insert sequence [Source:UniProtKB/TrEMBL;Acc:Q6H6V1]	qAG2.1, Baltazar et al., 2014
LOC_Os02g09940	OS02G0192700	2	5166998	5167991	5539.86	677.577	-3.03139	0.0229564	3922.59	1504.04	-1.38296	0.243294	1153.08	433.275	-1.41214	0.235647	1736.88	762.026	-1.18859	0.302266	3226.16	1178.19	-1.45325	0.231216	3924.47	1166.81	-1.74993	0.136512	Peroxiredoxin-2E-2, chloroplastic [Source:UniProtKB/Swiss-Prot;Acc:Q7F8S5]	qAG2.1, Baltazar et al., 2014
LOC_Os02g15660	OS02G0255700	2	8810104	8820960	13993.6	2627.97	-2.41275	0.0483989	7524.81	5906.74	-0.349294	0.746044	676.787	2043.26	1.5941	0.154249	1058.38	3261.61	1.62373	0.135096	6722.35	6922.42	0.0423102	0.9624	11175.1	6387.62	-0.806935	0.452481	Os02g0255700 protein [Source:UniProtKB/TrEMBL;Acc:Q0E2A9]
LOC_Os02g18450	OS02G0285800	2	10739451	10747067	7656.22	1166.79	-2.71409	0.0354782	4124.19	2775.65	-0.571283	0.615452	1271.42	868.325	-0.550134	0.629505	1678.53	984.971	-0.769045	0.491559	2969.47	2134.01	-0.476636	0.689718	4617.14	2237.8	-1.04492	0.354798	Os02g0285800 protein; Putative GTP-binding protein typA [Source:UniProtKB/TrEMBL;Acc:Q6KA61]
LOC_Os02g31860	OS02G0517900	2	18817869	18821399	129.244	0.538187	-7.90777	0.0306025	96.8927	138.492	0.515345	0.84994	5.86809	0	-10000000000	0.225889	2.28838	7.07764	1.62894	0.670781	10.8344	1.54415	-2.81074	0.482125	173.405	3.68545	-5.55616	0.0651646	Os02g0517900 protein [Source:UniProtKB/TrEMBL;Acc:Q0E0W2]	qAG2.2, Baltazar et al., 2014
LOC_Os02g41840	OS02G0629000	2	25153298	25154265	7.3434	711.483	6.59824	0.000570659	7.81393	8.71629	0.157666	1	1585.36	777.763	-1.02741	0.481607	1484.02	868.19	-0.773425	0.58536	20.002	64.8543	1.69705	0.287383	45.7331	77.3944	0.75899	0.611757	Os02g0629000 protein; Putative uncharacterized protein B1469H02.18; cDNA clone:001-103-G03, full insert sequence [Source:UniProtKB/TrEMBL;Acc:Q6K219]
LOC_Os02g43790	OS02G0654700	2	26422187	26423485	30.8423	774.451	4.65019	0.0221897	3.12557	19.3695	2.6316	0.262567	466.514	503.119	0.108982	0.95543	93.8238	390.45	2.05711	0.233437	5.83393	67.9426	3.54178	0.0770767	416.362	134.887	-1.62608	0.342013	Os02g0654700 protein; Putative AP2-related transcription factor; cDNA clone:001-205-B11, full insert sequence [Source:UniProtKB/TrEMBL;Acc:Q6H7H6]	qAG2, Septiningsih et al., 2013
LOC_Os02g44870	OS02G0669100	2	27165514	27166898	857.709	5636.43	2.71622	0.0257115	903.29	710.862	-0.34562	0.752196	9775.27	13307.8	0.445064	0.69033	8092.87	13035.8	0.687759	0.520752	1772.68	1533.34	-0.209255	0.85985	1553.02	1277.38	-0.281893	0.793615	Dehydration-stress inducible protein 1; Os02g0669100 protein; Putative cold acclimation protein; SK3-type dehydrin 1; cDNA clone:J023042N13, full insert sequence [Source:UniProtKB/TrEMBL;Acc:Q6ESR4]	qAG2, Septiningsih et al., 2013
LOC_Os02g45450	OS02G0677300	2	27652935	27654206	8.81208	230.344	4.70816	0.0357461	3.12557	3.87391	0.30967	1	172.131	469.973	1.44907	0.437063	86.9586	778.54	3.16237	0.0961832	13.3347	6.1766	-1.1103	0.675041	336.329	200.488	-0.746354	0.676515	Dehydration-responsive element-binding protein 1G [Source:UniProtKB/Swiss-Prot;Acc:Q6EP77]	qAG2, Septiningsih et al., 2013
LOC_Os02g47020	OS02G0698000	2	28701864	28704291	24353.6	4061.16	-2.58417	0.0345978	4488.32	5072.88	0.17663	0.874805	1334.99	1273.19	-0.0683852	0.9465	1861.6	3083.49	0.728021	0.492831	6091.45	3616.4	-0.752234	0.503336	21379.3	5809	-1.87985	0.0864145	Phosphoribulokinase [Source:UniProtKB/TrEMBL;Acc:Q6Z8F4]	qAG2, Septiningsih et al., 2013
LOC_Os02g48770	OS02G0719600	2	29850372	29852422	13.2181	665.737	5.65436	0.0130304	6.25114	12.5902	1.01011	0.707792	504.656	472.932	-0.0936673	0.955319	292.913	143.912	-1.02529	0.570163	25.0025	3.0883	-3.01719	0.220541	80.9857	12.5305	-2.69222	0.167955	Os02g0719600 protein; Putative S-adenosyl-L-methionine:salicylic acid carboxyl methyltransferase [Source:UniProtKB/TrEMBL;Acc:Q6ZI02]	qAG2, Jiang et al., 2004; qAG2, Septiningsih et al., 2013
LOC_Os02g52000	OS02G0756600	2	31835161	31836353	1.46868	381.575	8.0213	0.00305843	7.81393	2.90543	-1.4273	0.626877	353.064	274.052	-0.365478	0.839509	92.6796	568.57	2.61702	0.16453	10.001	46.3245	2.21163	0.283285	215.327	264.615	0.297368	0.871298	Os02g0756600 protein; Putative phi-1; cDNA clone:001-108-F03, full insert sequence [Source:UniProtKB/TrEMBL;Acc:Q6Z677]
LOC_Os02g52150	OS02G0758000	2	31920854	31922068	29.3736	494.594	4.07365	0.0250278	31.2557	15.4956	-1.01226	0.568327	214.185	732.187	1.77335	0.26582	431.36	516.667	0.260342	0.863939	23.3357	35.5154	0.605906	0.733212	1533.01	258.718	-2.56691	0.106692	24.1 kDa heat shock protein, mitochondrial [Source:UniProtKB/Swiss-Prot;Acc:Q6Z7V2]
LOC_Os02g54820	OS02G0790500	2	33569391	33573165	796.024	7316.65	3.2003	0.0102682	654.807	460.026	-0.509353	0.648337	7100.39	8254.12	0.217215	0.849976	5620.27	8972.08	0.674803	0.534004	803.415	1175.1	0.548562	0.624995	2342.87	2868.02	0.291777	0.790012	Os02g0790500 protein [Source:UniProtKB/TrEMBL;Acc:Q0DWW9]
LOC_Os02g55560	OS02G0799000	2	34026274	34030282	389.2	3048.83	2.96967	0.0377877	195.348	309.913	0.665813	0.613692	843.05	2141.51	1.34494	0.302381	627.017	2873.52	2.19624	0.0894192	235.857	433.906	0.879467	0.501125	543.081	359.7	-0.594373	0.637246	Probable protein phosphatase 2C 27 [Source:UniProtKB/Swiss-Prot;Acc:Q69QZ0]
LOC_Os03g01740	OS03G0107700	3	470350	471075	364.232	7409.22	4.34639	0.00131261	93.7671	96.8477	0.0466352	0.985955	3870.01	3611.21	-0.0998531	0.927788	1045.79	3062.26	1.55	0.180326	356.703	818.399	1.19808	0.317578	1866.48	3538.03	0.922624	0.422732	Cyclin-dependent protein kinase inhibitor EL2 [Source:UniProtKB/Swiss-Prot;Acc:Q10SY2]
LOC_Os03g02690	OS03G0118600	3	1004328	1007269	2766.99	412.789	-2.74484	0.0453405	3688.17	1905.96	-0.952387	0.433787	711.017	413.15	-0.78322	0.52043	734.571	589.803	-0.316669	0.790076	2370.24	1139.58	-1.05653	0.40067	2659.19	590.409	-2.1712	0.0788085	Dihydrodipicolinate reductase, C-terminus family protein, expressed; Os03g0118600 protein; cDNA clone:J013023L22, full insert sequence [Source:UniProtKB/TrEMBL;Acc:Q10SL6]
LOC_Os03g02820	OS03G0120000	3	1099335	1102869	771.057	74.808	-3.36557	0.0440817	1192.41	664.375	-0.843805	0.560886	145.724	135.546	-0.104456	0.942968	242.569	155.708	-0.639551	0.656427	700.905	355.154	-0.980773	0.517753	1070.92	201.225	-2.41196	0.105019	Os03g0120000 protein [Source:UniProtKB/TrEMBL;Acc:C7IZY3]
LOC_Os03g08310	OS03G0180800	3	4232004	4233038	22.0302	1445.57	6.03601	0.00047534	17.1906	16.4641	-0.0622992	1	515.414	313.71	-0.716302	0.603155	406.188	2415.83	2.5723	0.0679264	44.1712	9.26489	-2.25326	0.175877	1777.87	515.226	-1.78688	0.195901	Os03g0180800 protein; Putative uncharacterized protein OSJNBa0050H14.22; Putative uncharacterized protein OSJNBb0076N15.8; ZIM motif family protein, expressed; cDNA clone:J023062P07, full insert sequence [Source:UniProtKB/TrEMBL;Acc:Q8GSI0]
LOC_Os03g08880	OS03G0187800	3	4598924	4600430	1.46868	592.006	8.65495	0.00725607	1.56279	4.84238	1.6316	0.756515	222.01	118.973	-0.899989	0.683646	3.43258	77.854	4.50341	0.0855054	1.66684	7.72074	2.21163	0.507471	3.81109	39.8028	3.38459	0.181724	Expressed protein; Os03g0187800 protein; Putative uncharacterized protein OJ1217B09.4 [Source:UniProtKB/TrEMBL;Acc:Q8H7P2]
LOC_Os03g10210	OS03G0198600	3	5180779	5182185	42.5917	935.907	4.45772	0.0200602	51.5719	138.492	1.42515	0.40519	325.679	979.603	1.58875	0.340939	211.676	593.342	1.48701	0.35623	39.1707	80.2957	1.03555	0.54854	37.1582	84.0282	1.1772	0.479428	Homeobox-leucine zipper protein HOX12 [Source:UniProtKB/Swiss-Prot;Acc:Q10QF2]
LOC_Os03g10260	OS03G0199500	3	5225077	5226496	24.9675	372.964	3.90091	0.0364345	75.0137	87.1629	0.21656	0.908897	349.152	1034.65	1.56722	0.335146	569.808	823.365	0.531057	0.731127	85.0087	84.9282	-0.00136651	1	76.2219	306.629	2.00822	0.214041	cDNA, clone: J080009C14, full insert sequence [Source:UniProtKB/TrEMBL;Acc:B7F9G9]
LOC_Os03g11900	OS03G0218400	3	6233563	6238297	402.418	3665.05	3.18707	0.0316123	340.687	412.571	0.276195	0.841801	684.611	1012.16	0.564078	0.675421	550.356	1141.86	1.05295	0.416444	399.207	296.477	-0.42922	0.76138	410.645	349.381	-0.233093	0.858345	Os03g0218400 protein; Sugar carrier protein C, putative, expressed; cDNA clone:J023009G17, full insert sequence; cDNA clone:J023140P21, full insert sequence [Source:UniProtKB/TrEMBL;Acc:Q10PW9]
LOC_Os03g13740	OS03G0240600	3	7440402	7442007	1.46868	264.25	7.49124	0.0340331	0	8.71629	Inf	0.320126	51.8348	118.381	1.19144	0.645165	14.8745	159.247	3.42035	0.197865	0	1.54415	Inf	0.822872	11.4333	8.10799	-0.495824	0.882602	Os03g0240600 protein; U-box containing E3 ligase; U-box domain containing protein, expressed; cDNA clone:002-155-G08, full insert sequence [Source:UniProtKB/TrEMBL;Acc:Q10PB1]
LOC_Os03g14050	OS03G0244200	3	7626455	7629565	635.938	6645.53	3.38543	0.00593219	2192.59	2713.67	0.307612	0.782675	9768.42	14702.9	0.589906	0.594666	6839.98	9891	0.532124	0.616958	1388.47	2218.94	0.676371	0.540499	2292.37	6273.37	1.4524	0.183026	Os03g0244200 protein; SCUTL1, putative, expressed; cDNA clone:001-202-E10, full insert sequence [Source:UniProtKB/TrEMBL;Acc:Q10P75]
LOC_Os03g14300	OS03G0247200	3	7788798	7789593	33.7796	832.037	4.62242	0.0489315	60.9486	57.1401	-0.0930896	0.971563	64.549	214.27	1.73096	0.39959	91.5354	109.703	0.261206	0.898802	43.3378	54.0452	0.318542	0.882459	39.0637	58.2301	0.575936	0.77944	Expressed protein; Os03g0247200 protein; cDNA clone:J033079O20, full insert sequence [Source:UniProtKB/TrEMBL;Acc:Q10P49]
LOC_Os03g15270	OS03G0258200	3	8352195	8353718	79.3087	993.493	3.64696	0.0229179	53.1347	61.014	0.199487	0.912211	1882.68	804.991	-1.22574	0.385139	796.358	1459.17	0.873662	0.5225	56.6724	57.1335	0.0116896	1	277.257	339.061	0.290322	0.83523	Expressed protein; Os03g0258200 protein; cDNA clone:J023136E13, full insert sequence [Source:UniProtKB/TrEMBL;Acc:Q10NU5]
LOC_Os03g18030	OS03G0289800	3	10039387	10044161	17.6242	1511.23	6.42202	0.00390012	10.9395	26.1489	1.2572	0.553127	170.175	282.931	0.733432	0.685478	136.159	355.061	1.38278	0.427332	11.6679	4.63245	-1.33269	0.617093	69.5524	14.7418	-2.23819	0.226855	Os03g0289800 protein; Oxidoreductase, 2OG-Fe oxygenase family protein, expressed; cDNA clone:001-024-H01, full insert sequence; cDNA clone:J023003A10, full insert sequence [Source:UniProtKB/TrEMBL;Acc:Q10MY3]
LOC_Os03g18770	OS03G0299600	3	10517166	10518361	631.532	3574.1	2.50065	0.0437764	675.123	736.042	0.124638	0.917382	7032.91	5762.2	-0.287503	0.794422	2756.36	10312.1	1.9035	0.0903825	535.888	949.652	0.825467	0.469853	6370.24	2169.26	-1.55415	0.165672	Os03g0299600 protein [Source:UniProtKB/TrEMBL;Acc:Q0DSM5]
LOC_Os03g18910	OS03G0301200	3	10599142	10601525	214.427	2306.67	3.42725	0.0128389	478.212	510.387	0.0939409	0.945078	1517.88	2308.43	0.604854	0.625064	814.665	3015.07	1.88791	0.121604	669.235	855.458	0.354185	0.769924	1696.89	3101.67	0.870155	0.468602	COBRA-like protein 7, putative, expressed [Source:UniProtKB/TrEMBL;Acc:Q10MP1]
LOC_Os03g20700	OS03G0323200	3	11712280	11719587	21842.2	4168.8	-2.38942	0.0493673	5283.78	7361.39	0.478409	0.663533	1900.28	3083.83	0.698506	0.526296	2384.5	4653.55	0.964646	0.364835	4369.61	8049.65	0.88142	0.424313	12367.9	8657.86	-0.514525	0.628924	Magnesium-chelatase subunit ChlH, chloroplastic [Source:UniProtKB/Swiss-Prot;Acc:Q10M50]
LOC_Os03g22270	OS03G0342900	3	12766488	12768878	3345.65	20212.7	2.5949	0.0314648	4056.99	3096.22	-0.389902	0.718596	15994.5	15541.1	-0.0414881	0.96562	12800.1	36414.4	1.50836	0.163314	3416.18	2541.67	-0.426609	0.708667	8758.84	7274.34	-0.267924	0.801785	Os03g0342900 protein [Source:UniProtKB/TrEMBL;Acc:Q0DRZ9]
LOC_Os03g23010	OS03G0353400	3	13283192	13284513	2956.45	27968.5	3.24186	0.00853753	1820.65	1654.16	-0.138352	0.897259	27644.6	20217.1	-0.45142	0.679408	9765.68	37781.6	1.95189	0.0772994	2862.79	2702.26	-0.0832561	0.948741	12601.4	12722.2	0.013763	0.990486	ERD15; Expressed protein; cDNA clone:J013158E09, full insert sequence [Source:UniProtKB/TrEMBL;Acc:Q10LE3]
LOC_Os03g32230	OS03G0437200	3	18435990	18437086	5.87472	664.661	6.82196	0.00532718	6.25114	11.6217	0.894632	0.755937	119.318	537.45	2.17132	0.261564	58.3538	424.658	2.8634	0.137858	6.66735	55.5894	3.05962	0.152458	105.758	119.409	0.175142	0.928889	C2H2 transcription factor; C2H2 type zinc finger containing protein; C2H2-type zinc finger protein ZFP36; Os03g0437200 protein; Zinc finger, C2H2 type family protein, expressed; cDNA clone:006-206-D03, full insert sequence [Source:UniProtKB/TrEMBL;Acc:Q75KE5]	qAG3, Baltazar et al., 2014
LOC_Os03g36540	OS03G0563300	3	20248326	20250000	8906.07	1471.94	-2.59707	0.0370002	4922.77	3117.53	-0.65907	0.550253	1955.05	1342.44	-0.54235	0.62285	2918.83	1636.11	-0.835119	0.440144	9408.46	6326.38	-0.572579	0.617894	6870.45	2881.28	-1.25369	0.25335	Magnesium-chelatase subunit ChlI, chloroplastic [Source:UniProtKB/Swiss-Prot;Acc:Q53RM0]	qAG3, Baltazar et al., 2014
LOC_Os03g36560	OS03G0563600	3	20264124	20269616	16.1555	768.531	5.57201	0.0102709	89.0788	75.5412	-0.237818	0.899572	218.098	287.666	0.399421	0.827939	255.155	126.218	-1.01546	0.558658	365.871	257.873	-0.504674	0.790046	17.1499	138.573	3.01437	0.109593	Class III peroxidase 49; Os03g0563600 protein; Peroxidase 27, putative, expressed; Peroxidase, putative; cDNA clone:J033112F15, full insert sequence [Source:UniProtKB/TrEMBL;Acc:Q5U1P4]	qAG3, Baltazar et al., 2014
LOC_Os03g44630	OS03G0648500	3	25131035	25131791	7.3434	361.123	5.6199	0.0393006	20.3162	6.77934	-1.58342	0.536113	128.12	116.013	-0.143205	0.946077	177.35	167.504	-0.0824015	0.972305	40.8375	27.7947	-0.555086	0.834724	32.3943	67.0752	1.05004	0.635174	Os03g0648500 protein; Phytocyanin-related; Plastocyanin-like domain containing protein, expressed; cDNA clone:002-133-B02, full insert sequence [Source:UniProtKB/TrEMBL;Acc:Q60DI9]
LOC_Os03g49260	OS03G0699700	3	28049600	28053580	88.1208	1331.47	3.9174	0.0406603	79.7021	128.807	0.692527	0.692726	90.9555	543.961	2.58027	0.139971	143.024	206.431	0.529403	0.747629	107.511	206.916	0.944561	0.579179	58.1192	277.146	2.25356	0.186011	Linoleate 9S-lipoxygenase 1 [Source:UniProtKB/Swiss-Prot;Acc:Q76I22]	qAG3-1, Angaji et al., 2010
LOC_Os03g50960	OS03G0718800	3	29110322	29111067	0	186.213	Inf	0.00667275	1.56279	1.93695	0.30967	1	445.975	513.182	0.202506	0.925394	215.108	182.839	-0.234489	0.906758	5.83393	15.4415	1.40427	0.573887	33.3471	6.63381	-2.32965	0.284962	Os03g0718800 protein; Protease inhibitor/seed storage/LTP family protein, expressed; Putative protease inhibitor/seed storage/LTP family protein [Source:UniProtKB/TrEMBL;Acc:Q6ASW6]	qAG3-1, Angaji et al., 2010
LOC_Os03g51390	OS03G0723700	3	29401966	29403115	26.4362	513.969	4.28109	0.0373613	4.68836	28.0858	2.58269	0.240006	285.581	629.787	1.14097	0.521109	124.717	694.788	2.47792	0.162723	18.3352	30.883	0.752196	0.706598	218.185	140.784	-0.632068	0.713642	Os03g0723700 protein [Source:UniProtKB/TrEMBL;Acc:C7J032]	qAG3-1, Angaji et al., 2010
LOC_Os03g51650	OS03G0726500	3	29560551	29565846	878.27	8041.05	3.19465	0.0101887	2148.83	3026.49	0.494094	0.660729	6303.31	9666.99	0.616957	0.583867	2851.33	7965.88	1.4822	0.177749	1286.8	986.711	-0.383086	0.74333	2353.35	2748.61	0.223985	0.837803	Expressed protein; Os03g0726500 protein; cDNA clone:J023028O14, full insert sequence [Source:UniProtKB/TrEMBL;Acc:Q75GI8]	qAG3-1, Angaji et al., 2010
LOC_Os03g52860	OS03G0738600	3	30315456	30318959	24.9675	1254.51	5.65093	0.00675543	23.4418	13.5587	-0.789866	0.699436	960.411	207.759	-2.20874	0.208665	218.541	63.6987	-1.77857	0.299164	6.66735	21.6181	1.69705	0.407083	20.961	170.268	3.02202	0.0955657	Linoleate 9S-lipoxygenase 2 [Source:UniProtKB/Swiss-Prot;Acc:P29250]	qAG3-1, Angaji et al., 2010
LOC_Os03g53340	OS03G0745000	3	30604067	30607159	0	203.435	Inf	0.0061514	1.56279	0	-10000000000	0.839231	20.5383	101.216	2.30104	0.282971	62.9306	125.038	0.990537	0.621086	0	0	NA	NA	988.026	73.709	-3.74464	0.0815875		qAG3-1, Angaji et al., 2010
LOC_Os03g55240	OS03G0760200	3	31443454	31446045	60.2158	2181.27	5.17888	0.00243158	123.46	82.3205	-0.58472	0.691243	1133.52	744.617	-0.60624	0.667836	336.393	815.108	1.27685	0.362348	100.01	321.183	1.68325	0.257215	219.138	206.385	-0.0864997	0.953156	Os03g0760200 protein [Source:UniProtKB/TrEMBL;Acc:Q0DND2]
LOC_Os03g56930	OS03G0782200	3	32423241	32424487	155.68	0	-10000000000	0.0351358	6.25114	0.968477	-2.69033	0.591051	2.93405	0	-10000000000	0.460747	3.43258	0	-10000000000	0.576053	56.6724	0	-10000000000	0.124082	14.2916	0	-10000000000	0.178971	Expressed protein; Os03g0782200 protein; cDNA clone:J023003A19, full insert sequence [Source:UniProtKB/TrEMBL;Acc:Q10CI1]
LOC_Os03g60080	OS03G0815100	3	34166100	34167521	254.082	7814.48	4.94279	0.000202573	112.521	156.893	0.479595	0.68759	6663.22	3552.61	-0.907339	0.420338	3812.45	8486.09	1.15438	0.294648	193.353	779.795	2.01186	0.0884096	5025.88	4878.06	-0.0430684	0.968262	NAC transcription factor; NAC-domain containing protein 19, putative, expressed; Os03g0815100 protein; Putative NAC-domain protein; cDNA clone:001-037-H04, full insert sequence; cDNA clone:006-305-E06, full insert sequence; cDNA clone:J013116P10, full insert sequence; cDNA clone:J013120D02, full insert sequence [Source:UniProtKB/TrEMBL;Acc:Q75HE5]
LOC_Os03g60210	OS03G0816700	3	34242164	34243419	1.46868	126.474	6.42818	0.035834	1.56279	10.6532	2.7691	0.416647	44.9887	468.197	3.37948	0.143271	18.3071	271.309	3.88947	0.0948324	6.66735	58.6777	3.13763	0.197872	14.2916	196.803	3.78351	0.105338	Expressed protein [Source:UniProtKB/TrEMBL;Acc:Q10BI3]
LOC_Os03g60560	OS03G0820300	3	34424180	34425030	11.7494	839.034	6.15807	0.00185547	1.56279	10.6532	2.7691	0.30371	222.988	645.177	1.53273	0.336369	298.634	1579.49	2.40301	0.128011	12.5013	37.0596	1.56777	0.373996	183.885	395.817	1.10603	0.473841	C2H2 transcription factor; Os03g0820300 protein; Putative Cys2/His2 zinc-finger protein; Zinc finger protein ZFP182; Zinc finger, C2H2 type family protein, expressed; cDNA clone:J013170H07, full insert sequence [Source:UniProtKB/TrEMBL;Acc:Q84T96]
LOC_Os03g60570	OS03G0820400	3	34427704	34428391	8.81208	384.804	5.4485	0.0114345	0	1.93695	Inf	0.822134	191.691	559.35	1.54497	0.380323	122.429	799.773	2.70765	0.124797	14.1681	26.2505	0.889699	0.657656	293.454	468.789	0.675804	0.689634	C2H2 transcription factor; C2H2 type zinc finger transcription factor ZFP37; Os03g0820400 protein; Putative Cys2/His2 zinc-finger protein; Zinc finger protein ZFP15; Zinc finger, C2H2 type family protein, expressed; cDNA clone:002-157-B05, full insert sequence [Source:UniProtKB/TrEMBL;Acc:Q84TB8]
LOC_Os03g60880	OS03G0823800	3	34597455	34601207	267.3	2650.57	3.30977	0.0169077	1073.63	899.715	-0.254962	0.833394	2869.5	2984.98	0.0569216	0.967892	1092.7	2396.96	1.1333	0.347939	575.892	415.376	-0.47138	0.717114	222.949	700.235	1.65113	0.182106	Os03g0823800 protein; Permease I, putative, expressed; Putative permease [Source:UniProtKB/TrEMBL;Acc:Q852B5]
LOC_Os03g61960	OS03G0835900	3	35122475	35124341	1072.14	6400.66	2.57773	0.0346778	2159.77	2493.83	0.207484	0.855228	6223.11	3742.62	-0.73359	0.506627	7301.09	5711.65	-0.354204	0.741353	2324.4	3128.45	0.428585	0.697449	3178.45	9670.62	1.60528	0.146456	Ferredoxin-3, chloroplast, putative, expressed; Os03g0835900 protein; Putative ferredoxin; cDNA clone:J023058L21, full insert sequence [Source:UniProtKB/TrEMBL;Acc:Q75LK5]
LOC_Os03g64140	OS03G0858700	3	36243208	36245053	1182.29	107.099	-3.46456	0.0343523	1037.69	414.508	-1.3239	0.356623	220.054	224.332	0.0277811	0.992217	361.565	211.149	-0.775989	0.57887	938.429	294.932	-1.66986	0.26076	1082.35	288.202	-1.90901	0.18233	Expressed protein; Os03g0858700 protein; Putative uncharacterized protein OSJNBa0033P04.13; Putative uncharacterized protein OSJNBa0059G06.5; cDNA clone:001-038-A06, full insert sequence; cDNA clone:J013001B23, full insert sequence [Source:UniProtKB/TrEMBL;Acc:Q84M78]
LOC_Os04g01140	OS04G0101400	4	99797	101630	5106.6	535.496	-3.25341	0.0309624	364.129	631.447	0.794212	0.554376	180.933	80.4991	-1.16841	0.386285	73.2283	160.426	1.13144	0.394179	369.204	335.08	-0.139913	0.928513	1553.97	407.611	-1.9307	0.146587	Os04g0101400 protein; cDNA clone:J023143C19, full insert sequence [Source:UniProtKB/TrEMBL;Acc:Q0JFI2]
LOC_Os04g03920	OS04G0128700	4	1791428	1792971	4.40604	283.625	6.00836	0.0349885	0	11.6217	Inf	0.212636	138.878	383.555	1.46561	0.5161	6.86515	181.659	4.7258	0.0612053	0.833418	0	-10000000000	1	14.2916	66.3381	2.21467	0.336923	B1340F09.17 protein; OSJNBa0027H09.8 protein; Os04g0128700 protein [Source:UniProtKB/TrEMBL;Acc:Q7XP31]
LOC_Os04g27190	OS04G0340300	4	16057969	16068256	1536.24	39.2877	-5.28918	0.00965958	309.432	307.976	-0.0068041	0.995419	17.6043	44.3929	1.3344	0.464929	36.6142	63.6987	0.798863	0.646257	110.011	279.491	1.34515	0.437722	184.838	190.906	0.0466028	0.981252	Os04g0340300 protein; cDNA clone:J023097D21, full insert sequence [Source:UniProtKB/TrEMBL;Acc:Q0JE23]
LOC_Os04g36800	OS04G0445700	4	22216936	22221343	2766.99	393.953	-2.81222	0.0399213	2859.9	1507.92	-0.923405	0.446031	1022.03	576.516	-0.826001	0.496008	1542.37	534.362	-1.52926	0.202601	2357.74	1533.34	-0.620727	0.621795	2684.91	824.803	-1.70275	0.160269	3-oxoacyl-[acyl-carrier-protein] synthase [Source:UniProtKB/TrEMBL;Acc:B7F6I0]
LOC_Os04g41960	OS04G0497000	4	24858099	24859658	262.894	5501.35	4.38723	0.00131764	32.8185	55.2032	0.750242	0.574089	2336.48	2913.36	0.318346	0.791422	1466.85	7022.2	2.2592	0.0577787	195.02	134.341	-0.537722	0.671256	3003.14	1314.23	-1.19225	0.305619	NADPH oxidoreductase; OSJNBa0067K08.13 protein; Os04g0497000 protein; cDNA clone:006-210-F02, full insert sequence; cDNA clone:J023008C06, full insert sequence [Source:UniProtKB/TrEMBL;Acc:Q7XUK3]
LOC_Os04g46970	OS04G0556400	4	27843255	27845708	0	296.003	Inf	0.0167675	1.56279	4.84238	1.6316	0.77918	54.7689	57.4148	0.0680662	0.990295	30.8932	116.781	1.91844	0.450725	0	4.63245	Inf	0.374045	22.8666	23.5869	0.0447449	1	OSJNBb0012E24.10 protein [Source:UniProtKB/TrEMBL;Acc:Q7XSN7]
LOC_Os04g47620	OS04G0563900	4	28262938	28265746	0	158.227	Inf	0.012381	3.12557	13.5587	2.11702	0.476941	86.0654	285.89	1.73196	0.431355	22.8838	542.619	4.56754	0.0536863	5.83393	32.4271	2.47466	0.314189	23.8193	71.4977	1.58576	0.468533	OSJNBa0017B10.2 protein [Source:UniProtKB/TrEMBL;Acc:Q7XQK6]
LOC_Os04g49370	OS04G0583200	4	29465920	29467005	118.963	2298.06	4.27183	0.0024034	107.832	110.406	0.0340351	0.993123	3559	2660.61	-0.419713	0.725935	2521.8	5249.25	1.05766	0.372421	76.6745	220.813	1.52601	0.231036	645.027	829.963	0.363686	0.760923	OSJNBa0088A01.13 protein; Os04g0583200 protein [Source:UniProtKB/TrEMBL;Acc:Q7XUD3]
LOC_Os04g49520	OS04G0584700	4	29535821	29536764	20.5615	571.016	4.79551	0.0137387	125.023	129.776	0.0538307	0.985265	984.862	340.345	-1.53292	0.350227	94.968	900.039	3.24448	0.0564225	97.5099	86.4723	-0.173311	0.935555	151.491	120.883	-0.325624	0.841022	Os04g0584700 protein [Source:UniProtKB/TrEMBL;Acc:Q0JAQ2]
LOC_Os04g50030	OS04G0590200	4	29831246	29832981	1.46868	252.41	7.4251	0.0443277	10.9395	5.81086	-0.912723	0.802505	23.4724	130.219	2.47191	0.371745	29.749	18.8737	-0.656464	0.819785	2.50025	33.9713	3.76417	0.233436	0	7.3709	Inf	0.257666	OSJNBa0086O06.16 protein; Os04g0590200 protein; cDNA, clone: J100053D09, full insert sequence [Source:UniProtKB/TrEMBL;Acc:Q7XLZ3]
LOC_Os04g50120	OS04G0591100	4	29894815	29896857	264.362	3916.92	3.88913	0.004486	212.539	324.44	0.610224	0.620911	4552.66	2760.05	-0.722014	0.545482	2121.33	3994.15	0.912916	0.434835	204.187	534.276	1.38769	0.26261	504.017	1084.26	1.10516	0.351642	Os04g0591100 protein; cDNA clone:J023008F14, full insert sequence [Source:UniProtKB/TrEMBL;Acc:Q0JAL2]
LOC_Os04g53230	OS04G0623800	4	31700976	31703589	10881.4	1905.18	-2.51387	0.0473548	2169.15	2164.55	-0.00306317	0.994727	1472.89	523.836	-1.49146	0.195329	1754.05	1199.66	-0.548062	0.61894	3444.52	1122.6	-1.61746	0.168339	9053.25	2144.93	-2.0775	0.0698643	Aminomethyltransferase [Source:UniProtKB/TrEMBL;Acc:Q7XPR2]
LOC_Os04g55970	OS04G0653600	4	33341978	33346528	48.4664	2007.98	5.37261	0.00217629	165.655	228.561	0.464392	0.759011	424.459	1487.46	1.80915	0.22403	632.738	136.834	-2.20918	0.132535	219.189	276.403	0.334596	0.817126	24.7721	156.263	2.65719	0.0831803	Os04g0653600 protein; cDNA clone:J033072A06, full insert sequence [Source:UniProtKB/TrEMBL;Acc:Q0J9G5]
LOC_Os04g58810	OS04G0684900	4	34980601	34981819	196.803	2821.71	3.84175	0.00656324	12.5023	40.676	1.70199	0.2466	2503.72	1547.83	-0.693825	0.573527	567.519	2647.04	2.22164	0.0757463	90.0092	155.959	0.793023	0.538144	2282.84	2711.02	0.248001	0.8383	Os04g0684900 protein [Source:UniProtKB/TrEMBL;Acc:Q0J8W0]
LOC_Os05g07120	OS05G0163900	5	3756476	3759787	0	379.96	Inf	0.00473632	0	0	NA	NA	133.01	414.334	1.63926	0.459692	35.47	189.917	2.4207	0.273281	0	6.1766	Inf	0.243611	2.85832	25.0611	3.13221	0.220995	Os05g0163900 protein; Putative uncharacterized protein OSJNBa0027N19.3; Putative uncharacterized protein OSJNBb0099P06.13; cDNA clone:002-168-H12, full insert sequence [Source:UniProtKB/TrEMBL;Acc:Q75IR0]	qAG5, Jiang et al., 2006
LOC_Os05g07810	OS05G0170200	5	4205610	4207693	2.93736	277.166	6.56009	0.0153995	4.68836	11.6217	1.30967	0.654094	112.472	160.998	0.517481	0.805514	52.6328	666.477	3.66252	0.0863281	3.33367	44.7803	3.74768	0.12106	17.1499	236.606	3.78621	0.0830256	Putative uncharacterized protein P0685E10.5; cDNA clone:001-118-D04, full insert sequence [Source:UniProtKB/TrEMBL;Acc:Q65XS4]	qAG5, Jiang et al., 2006
LOC_Os05g11260	OS05G0202500	5	6359965	6363348	4978.82	726.552	-2.77667	0.0457116	1081.45	1036.27	-0.0615636	0.957385	366.756	807.359	1.13839	0.364215	798.646	1000.31	0.324813	0.786894	968.432	1218.33	0.331186	0.7854	1865.53	1270.74	-0.553914	0.645995		qAG5, Jiang et al., 2006
LOC_Os05g15850					368.638	5.38187	-6.09796	0.0256397	39.0696	16.4641	-1.24672	0.597904	6.84611	4.73524	-0.531847	0.883826	6.86515	21.2329	1.62894	0.511116	7.50076	6.1766	-0.280226	1	615.492	48.6479	-3.66129	0.114096
LOC_Os05g25920	OS05G0324700	5	15077683	15078347	24.9675	1096.29	5.45643	0.00585782	4.68836	18.4011	1.97263	0.362937	159.417	1355.46	3.08791	0.0739631	62.9306	627.55	3.3179	0.0530157	4.16709	54.0452	3.69705	0.0591941	55.2608	127.517	1.20635	0.461158	Os05g0324700 protein; Putative uncharacterized protein P0018A03.13; cDNA clone:001-117-H10, full insert sequence [Source:UniProtKB/TrEMBL;Acc:Q5W6T6]	qAG5, Jiang et al., 2004
LOC_Os05g27780	OS05G0344200	5	16178796	16179674	991.358	10499.5	3.40477	0.00567447	1015.81	792.214	-0.358669	0.741934	12449.2	6538.18	-0.929087	0.397987	10114.7	9928.74	-0.0267645	0.980006	1054.27	2087.69	0.985657	0.377096	2318.1	6717.1	1.5349	0.160482	Os05g0344200 protein; Putative uncharacterized protein P0015F11.13; cDNA clone:001-038-A07, full insert sequence; cDNA clone:006-305-F02, full insert sequence [Source:UniProtKB/TrEMBL;Acc:Q5W6M4]	qAG5, Jiang et al., 2004
LOC_Os05g33400	OS05G0402900	5	19631965	19633439	44.0604	1008.56	4.51667	0.00878967	17.1906	69.7303	2.02016	0.21547	615.172	1516.46	1.30165	0.381909	163.619	771.462	2.23725	0.130939	105.844	270.226	1.35223	0.371901	451.615	528.493	0.226793	0.875829	Os05g0402900 protein [Source:UniProtKB/TrEMBL;Acc:Q0DIB3]	qAG5, Jiang et al., 2004
LOC_Os05g33410	OS05G0403000	5	19634463	19635893	0	102.794	Inf	0.0434053	0	0.968477	Inf	1	31.2965	250.376	3.00002	0.2609	6.86515	83.752	3.60876	0.19144	3.33367	118.899	5.15649	0.0873845	2.85832	23.5869	3.04474	0.298386	Os05g0403000 protein; Putative uncharacterized protein OSJNBb0006J12.9 [Source:UniProtKB/TrEMBL;Acc:Q6AUL2]	qAG5, Jiang et al., 2004
LOC_Os05g34150	OS05G0412800	5	20192522	20193783	152.743	1032.24	2.75661	0.0485208	839.216	756.38	-0.14993	0.902172	2679.76	3053.64	0.188424	0.884986	1867.32	862.292	-1.11472	0.363246	894.258	1036.12	0.212434	0.860889	298.218	852.076	1.51461	0.225764	Putative glutathione s-transferase [Source:UniProtKB/TrEMBL;Acc:Q6AUB4]	qAG5, Jiang et al., 2004
LOC_Os05g37520	OS05G0447700	5	21963794	21966003	334.859	4193.01	3.64636	0.00528748	462.585	501.671	0.117024	0.925839	6876.43	2716.84	-1.33973	0.251067	3266.67	6509.07	0.99463	0.377594	555.89	898.695	0.693032	0.552648	1627.34	1966.56	0.273158	0.809669	Os05g0447700 protein; Putative uncharacterized protein OSJNBb0012G21.7; cDNA clone:J013129M13, full insert sequence; cDNA clone:J023089C14, full insert sequence [Source:UniProtKB/TrEMBL;Acc:Q688J0]	qAG5, Jiang et al., 2004
LOC_Os05g38040	OS05G0454500	5	22303574	22306360	186.522	1206.08	2.6929	0.0474467	112.521	167.546	0.574373	0.654212	4224.05	3335.98	-0.340517	0.776327	3272.39	3354.8	0.0358821	0.976071	94.1763	475.598	2.33631	0.0718698	542.128	578.615	0.0939714	0.9393	Os05g0454500 protein; Putative uncharacterized protein OJ1651_D06.1; cDNA clone:J033101G01, full insert sequence [Source:UniProtKB/TrEMBL;Acc:Q60EN2]
LOC_Os05g43830	OS05G0513900	5	25477117	25483468	277.58	1827.14	2.71861	0.0472451	459.459	963.634	1.06855	0.393306	896.84	3124.67	1.80078	0.154373	925.652	2269.56	1.29387	0.28582	615.063	2044.45	1.73291	0.174781	441.134	2260.65	2.35745	0.0614382	Os05g0513900 protein [Source:UniProtKB/TrEMBL;Acc:Q0DGS8]
LOC_Os05g44060	OS05G0516700	5	25624026	25624868	19.0928	547.874	4.84274	0.0116023	18.7534	19.3695	0.0466352	1	436.195	720.349	0.723722	0.655237	189.936	1512.26	2.99312	0.0695894	9.1676	13.8973	0.600193	0.795425	263.918	139.31	-0.921792	0.557988	Os05g0516700 protein; Putative uncharacterized protein B1130G10.12 [Source:UniProtKB/TrEMBL;Acc:Q75IJ0]
LOC_Os05g44900	OS05G0524100	5	26094863	26095836	196.803	1665.15	3.08083	0.0343824	178.158	128.807	-0.467938	0.724745	1275.33	1429.45	0.164588	0.904245	1481.73	1583.03	0.0954083	0.940119	234.191	180.665	-0.374362	0.791407	1344.36	1243.47	-0.112551	0.929166	Os05g0524100 protein [Source:UniProtKB/TrEMBL;Acc:Q0DGM2]
LOC_Os05g46020	OS05G0537100	5	26682661	26684165	91.0581	1755.57	4.269	0.0139694	18.7534	81.3521	2.11702	0.200213	813.709	335.61	-1.27773	0.397213	129.294	681.812	2.39872	0.115504	60.8395	165.224	1.44134	0.35718	636.453	260.93	-1.28639	0.385416	Putative uncharacterized protein OJ1741_B01.16; WRKY transcription factor 7 [Source:UniProtKB/TrEMBL;Acc:Q6IES4]
LOC_Os05g46350	OS05G0541100	5	26863363	26866131	82.246	1385.29	4.0741	0.0113855	167.218	237.277	0.504841	0.727613	634.732	1457.86	1.19963	0.396798	835.26	1643.19	0.976203	0.472675	157.516	169.856	0.108816	0.937343	67.6469	259.456	1.93939	0.172122	Os05g0541100 protein [Source:UniProtKB/TrEMBL;Acc:Q0DGC3]
LOC_Os05g46760	OS05G0545400	5	27075999	27077365	8.81208	623.759	6.14536	0.00230797	7.81393	5.81086	-0.427296	0.929818	859.676	447.48	-0.941969	0.549153	283.76	901.219	1.66721	0.285145	42.5043	26.2505	-0.695263	0.709522	430.653	428.249	-0.00807724	0.99661	Os05g0545400 protein [Source:UniProtKB/TrEMBL;Acc:Q0DG97]
LOC_Os05g49060	OS05G0565400	5	28128521	28131181	12366.3	2289.99	-2.433	0.0470104	7030.97	4118.93	-0.771454	0.48034	3147.25	1723.04	-0.869141	0.428646	4143.12	2597.49	-0.673598	0.527663	6786.53	4107.44	-0.724435	0.521863	13350.3	3835.81	-1.79926	0.101992	Os05g0565400 protein; Putative uncharacterized protein OSJNBb0053D02.19; cDNA clone:001-013-E05, full insert sequence; cDNA clone:001-042-C08, full insert sequence; cDNA clone:J023002B08, full insert sequence [Source:UniProtKB/TrEMBL;Acc:Q6AUF2]
LOC_Os05g50500	OS05G0582000	5	28957544	28958711	471.446	16.6838	-4.82057	0.0475279	284.427	92.9738	-1.61316	0.436179	10.7582	4.73524	-1.18392	0.634673	10.2977	5.89803	-0.804021	0.785304	295.03	94.1931	-1.64717	0.443163	202.941	22.8498	-3.15081	0.142123	Os05g0582000 protein; Putative uncharacterized protein OJ1651_G11.7 [Source:UniProtKB/TrEMBL;Acc:Q6L5D8]
LOC_Os05g50610	OS05G0583000	5	29010970	29013172	0	417.095	Inf	0.00295484	1.56279	15.4956	3.30967	0.283639	145.724	406.639	1.48051	0.483958	68.6515	297.261	2.11437	0.308922	0.833418	27.7947	5.05962	0.0831871	9.52773	35.3803	1.89274	0.393686	Putative WRKY17; Putative uncharacterized protein OJ1651_G11.15; WRKY transcription factor 8 [Source:UniProtKB/TrEMBL;Acc:Q75HY3]
LOC_Os05g51390	OS05G0591600	5	29470011	29474250	13.2181	450.463	5.09082	0.044306	0	8.71629	Inf	0.258575	37.1646	460.502	3.63121	0.108416	14.8745	325.571	4.45206	0.0546941	4.16709	21.6181	2.37513	0.343095	10.4805	36.8545	1.81413	0.414288	Probable cytokinin riboside 5'-monophosphate phosphoribohydrolase LOGL8 [Source:UniProtKB/Swiss-Prot;Acc:Q0DFG8]
LOC_Os06g03670	OS06G0127100	6	1434770	1435533	0	411.713	Inf	0.000994753	3.12557	4.84238	0.631598	0.958138	114.428	391.249	1.77365	0.346042	128.15	838.7	2.71033	0.147371	12.5013	4.63245	-1.43223	0.592147	284.879	90.662	-1.65178	0.366167	Dehydration-responsive element-binding protein 1C [Source:UniProtKB/Swiss-Prot;Acc:Q9LWV3]
LOC_Os06g07220	OS06G0168700	6	3455800	3456811	57.2785	750.771	3.71231	0.0447339	221.916	134.618	-0.721136	0.657081	168.219	615.581	1.87161	0.258836	305.499	259.513	-0.23536	0.882775	245.858	433.906	0.819554	0.614136	60.0247	467.315	2.96077	0.0790399	Os06g0168700 protein; Putative prolin rich protein; cDNA clone:J033033M04, full insert sequence; cDNA clone:J033134F12, full insert sequence [Source:UniProtKB/TrEMBL;Acc:Q5VRF4]	qAG6, Septiningsih et al., 2013
LOC_Os06g11150	OS06G0215100	6	5848330	5849957	27.9049	859.485	4.94488	0.0134189	37.5069	44.5499	0.248269	0.910694	266.998	1057.14	1.98527	0.24834	70.9399	629.91	3.15048	0.0715613	25.0025	63.3101	1.34036	0.45551	87.6551	50.8592	-0.78533	0.641179	Os06g0215100 protein; cDNA, clone: J090029F19, full insert sequence [Source:UniProtKB/TrEMBL;Acc:A3B9M6]	qAG6, Septiningsih et al., 2013
LOC_Os06g11200	OS06G0215500	6	5878574	5880549	0	254.024	Inf	0.0324594	0	0	NA	NA	0.978016	37.8819	5.27551	0.154486	3.43258	75.4948	4.45901	0.167963	0.833418	6.1766	2.8897	0.528166	5.71664	1.47418	-1.95526	0.61816	Putative 12-oxophytodienoate reductase 6 [Source:UniProtKB/Swiss-Prot;Acc:Q69TI2]	qAG6, Septiningsih et al., 2013
LOC_Os06g11720	OS06G0220500	6	6205613	6207557	1.46868	326.68	7.79721	0.0191652	1.56279	7.74781	2.30967	0.563816	7.82413	220.781	4.81854	0.0727896	5.72096	195.815	5.09709	0.0594261	3.33367	27.7947	3.05962	0.270933	13.3388	53.8075	2.01218	0.408059	Os06g0220500 protein; Putative glucosyltransferase-10 [Source:UniProtKB/TrEMBL;Acc:Q67W01]	qAG6, Septiningsih et al., 2013
LOC_Os06g14350	OS06G0254600	6	7996917	8004842	133.65	0	-10000000000	0.0280238	3.12557	32.9282	3.39713	0.335233	0	0	NA	NA	4.57677	1.17961	-1.95602	0.716812	10.8344	0	-10000000000	0.327266	155.302	1.47418	-6.71902	0.0614423	Os06g0254600 protein; Putative calcium binding protein [Source:UniProtKB/TrEMBL;Acc:Q652U5]
LOC_Os06g14450	OS06G0255900	6	8116249	8119845	92.5268	948.824	3.3582	0.0366988	118.772	165.61	0.479595	0.748379	964.324	1200.38	0.315906	0.828746	314.653	1396.65	2.15014	0.131803	148.348	220.813	0.573837	0.69071	487.82	442.254	-0.141474	0.919348
LOC_Os06g15330	OS06G0264200	6	8704897	8706342	1615.55	172.758	-3.2252	0.0471988	679.812	339.935	-0.999875	0.484347	297.317	116.013	-1.35771	0.3487	310.076	292.542	-0.083977	0.954677	837.585	304.197	-1.46123	0.324505	1192.87	181.324	-2.7178	0.0650108	Os06g0264200 protein; Zinc finger protein-like [Source:UniProtKB/TrEMBL;Acc:Q0DD26]
LOC_Os06g15680	OS06G0267400	6	8876051	8877757	108.682	2.69093	-5.33587	0.0307738	139.088	180.137	0.373095	0.857218	29.3405	56.8229	0.95358	0.645581	9.15354	173.402	4.24365	0.0526674	135.847	211.548	0.639003	0.744008	584.05	171.005	-1.77205	0.361027	Putative uncharacterized protein [Source:UniProtKB/TrEMBL;Acc:A3BAI4]
LOC_Os06g33970	OS06G0530600	6	19780992	19781426	1.46868	350.898	7.90039	0.0140611	0	7.74781	Inf	0.312807	92.9115	391.841	2.07634	0.369454	18.3071	92.0093	2.32938	0.315344	1.66684	23.1622	3.79659	0.188442	20.961	24.324	0.21467	0.943228	Os06g0530600 protein; Putative uncharacterized protein P0410C01.15; Putative uncharacterized protein P0438E12.36 [Source:UniProtKB/TrEMBL;Acc:Q5Z6B2]
LOC_Os06g39370	OS06G0594400	6	23367376	23368829	10.2808	423.015	5.36269	0.0193238	1.56279	1.93695	0.30967	1	273.844	185.858	-0.559154	0.760642	115.563	213.509	0.88561	0.627146	8.33418	46.3245	2.47466	0.237033	397.306	499.747	0.330945	0.85605	Kelch repeat-containing F-box-like; Os06g0594400 protein; cDNA clone:J023001I15, full insert sequence [Source:UniProtKB/TrEMBL;Acc:Q69UE9]
LOC_Os06g40170	OS06G0604200	6	23908918	23913796	406.824	3885.17	3.2555	0.0139776	489.152	688.587	0.493356	0.6824	3225.5	4144.52	0.361684	0.76399	1367.31	4956.7	1.85804	0.115185	645.899	1020.68	0.660153	0.57967	1289.1	1250.84	-0.0434679	0.970001	Phospholipase D [Source:UniProtKB/TrEMBL;Acc:Q69X22]
LOC_Os06g45710	OS06G0668200	6	27676510	27679751	289.33	2549.39	3.13937	0.0220716	654.807	878.408	0.423822	0.734543	1190.25	3012.8	1.33984	0.28204	895.903	2085.54	1.21901	0.310835	387.54	1502.46	1.95491	0.126166	592.625	2932.14	2.30676	0.0649061	Phosphoglycerate kinase [Source:UniProtKB/TrEMBL;Acc:Q655T1]
LOC_Os07g06175	OS07G0156200	7	3011373	3014163	224.708	0.538187	-8.70573	0.0436302	0	0	NA	NA	23.4724	0	-10000000000	0.112318	0	0	NA	NA	0.833418	0	-10000000000	1	3.81109	1.47418	-1.37029	0.795306	Class III peroxidase 99; Putative peroxidase [Source:UniProtKB/TrEMBL;Acc:Q69QL4]
LOC_Os07g07230	OS07G0166700	7	3583172	3588346	6172.86	843.339	-2.87175	0.0255737	6227.7	3857.44	-0.691055	0.541112	1170.68	1312.85	0.165344	0.889334	1292.94	1216.17	-0.0883027	0.937041	3960.4	1832.9	-1.11152	0.3431	6600.81	1495.56	-2.14196	0.0632181	Putative brassinosteroid LRR receptor kinase protein; cDNA, clone: J090033M17, full insert sequence [Source:UniProtKB/TrEMBL;Acc:Q7F0P5]
LOC_Os07g09190	OS07G0190000	7	4821207	4824665	10.2808	326.68	4.98986	0.0387232	39.0696	43.5815	0.157666	0.960168	329.591	154.487	-1.09319	0.579961	144.168	358.6	1.31462	0.497371	42.5043	20.0739	-1.08229	0.633253	188.649	56.0188	-1.75172	0.376399	Probable 1-deoxy-D-xylulose-5-phosphate synthase 2, chloroplastic [Source:UniProtKB/Swiss-Prot;Acc:Q6YU51]	qAG7, Baltazar et al., 2014
LOC_Os07g09420	OS07G0192000	7	4969408	4971145	69.0279	1883.12	4.7698	0.00978157	29.6929	40.676	0.454059	0.81008	389.25	902.655	1.21348	0.445928	64.0748	443.532	2.79121	0.0854314	21.6689	194.563	3.16654	0.066768	51.4498	78.1315	0.60274	0.707115	AAA-type ATPase-like; Os07g0192000 protein; cDNA clone:J013027N01, full insert sequence [Source:UniProtKB/TrEMBL;Acc:Q69S65]	qAG7, Baltazar et al., 2014
LOC_Os07g12340	OS07G0225300	7	6968003	6969254	151.274	1457.41	3.26817	0.0347576	39.0696	75.5412	0.951216	0.523182	1206.87	1249.51	0.0500925	0.976141	146.457	828.084	2.4993	0.075255	95.0097	461.701	2.28081	0.116625	718.391	1272.22	0.824503	0.541384	NAC domain-containing protein 67 [Source:UniProtKB/Swiss-Prot;Acc:Q7EZT1]	qAG7, Baltazar et al., 2014
LOC_Os07g23990	OS07G0421866	7	13589444	13592322	10941.7	2011.2	-2.4437	0.0464832	6759.05	5606.51	-0.269716	0.802274	2184.89	2619.18	0.261557	0.81624	2921.12	2820.44	-0.0506036	0.962469	6770.69	5331.95	-0.344641	0.764465	10846.4	4059.89	-1.4177	0.193711	Putative tetratricopeptide repeat(TPR)-containing protein [Source:UniProtKB/TrEMBL;Acc:Q7EY18]	qAG7, Baltazar et al., 2014
LOC_Os07g29750	OS07G0480800	7	17490699	17492940	966.391	5391.02	2.47988	0.0495976	1211.16	1128.28	-0.102269	0.926213	9700.94	6440.52	-0.590947	0.60373	1890.21	974.355	-0.956024	0.393748	730.074	1803.57	1.30474	0.266951	685.997	1531.67	1.15883	0.307302	Putative xyloglucan endo-transglycosylase; cDNA, clone: J100024I07, full insert sequence [Source:UniProtKB/TrEMBL;Acc:Q8GVR3]	qAG7.2, Septiningsih et al., 2013; qAG7, Baltazar et al., 2014
LOC_Os07g44440	OS07G0638400	7	26551676	26552939	0	333.676	Inf	0.0166626	1.56279	1.93695	0.30967	1	34.2306	98.2563	1.52126	0.569592	32.0374	24.7717	-0.371062	0.900951	0.833418	30.883	5.21163	0.136539	0.952773	7.3709	2.95164	0.433081	1-Cys peroxiredoxin B [Source:UniProtKB/Swiss-Prot;Acc:P0C5D1]	qAG7-2, Angaji et al., 2010
LOC_Os07g46320	OS07G0656600	7	27628327	27629951	163.023	2.15275	-6.24276	0.0435889	51.5719	20.338	-1.34241	0.598791	14.6702	1.77572	-3.04642	0.297779	21.7397	0	-10000000000	0.103078	50.8385	0	-10000000000	0.0653636	405.881	11.7934	-5.105	0.0613526	Os07g0656600 protein; Putative uncharacterized protein P0018C07.138; Putative uncharacterized protein P0047B07.112; cDNA clone:006-305-F12, full insert sequence [Source:UniProtKB/TrEMBL;Acc:Q7EYX5]	qAG7, Jiang et al., 2004; qAG7-2, Angaji et al., 2010
LOC_Os07g48280	OS07G0680600	7	28848874	28852236	499.351	3057.98	2.61445	0.0444049	31.2557	35.8336	0.197195	0.914621	1706.64	2594.32	0.6042	0.612083	1112.15	5417.93	2.28438	0.0549604	830.085	455.524	-0.865732	0.478333	5308.85	3563.83	-0.574972	0.616902	Os07g0680600 protein; Putative uncharacterized protein OJ1205_F02.25; Putative uncharacterized protein OSJNBa0008J01.12; cDNA clone:J033117L20, full insert sequence [Source:UniProtKB/TrEMBL;Acc:Q7XHX2]	qAG7, Jiang et al., 2004; qAG7-2, Angaji et al., 2010
LOC_Os08g04360	OS08G0138100	8	2137494	2138081	1.46868	358.971	7.9332	0.0215185	0	1.93695	Inf	0.851098	91.9335	160.998	0.808382	0.746601	5.72096	113.242	4.30701	0.11553	0.833418	0	-10000000000	1	0	0.73709	Inf	1	Putative blue copper binding protein [Source:UniProtKB/TrEMBL;Acc:Q6ZJW0]
LOC_Os08g10500	OS08G0205800	8	6168352	6169288	51.4038	745.927	3.85909	0.0496792	10.9395	6.77934	-0.69033	0.798076	591.7	341.529	-0.792856	0.639767	107.554	629.91	2.55008	0.142441	6.66735	20.0739	1.59014	0.441698	338.234	134.887	-1.32627	0.432504
LOC_Os08g15420	OS08G0253800	8	9384129	9387669	0	566.173	Inf	0.00881277	9.37671	1.93695	-2.27529	0.517708	0	22.4924	Inf	0.0986787	4.57677	1.17961	-1.95602	0.687076	0	18.5298	Inf	0.10962	1.90555	5.15963	1.43706	0.7153	Probable xyloglucan glycosyltransferase 3 [Source:UniProtKB/Swiss-Prot;Acc:Q7PC69]
LOC_Os08g17500	OS08G0277200	8	10718581	10720791	0	331.523	Inf	0.00919585	0	0	NA	NA	403.921	15.9814	-4.6596	0.0746505	14.8745	97.9073	2.71858	0.26541	0.833418	0	-10000000000	1	3.81109	0	-10000000000	0.32846	Os08g0277200 protein; Putative cinnamoyl-CoA reductase; cDNA clone:002-103-D08, full insert sequence [Source:UniProtKB/TrEMBL;Acc:Q6Z1M5]
LOC_Os08g31030	OS08G0401500	8	19157206	19161819	3026.95	131.318	-4.52673	0.00260042	1476.83	1445.94	-0.0305025	0.977571	230.812	229.659	-0.00722193	0.99426	140.736	373.935	1.4098	0.262601	1848.52	452.436	-2.03059	0.124667	3336.61	686.968	-2.28007	0.0761981	Os08g0401500 protein; Putative mandelonitrile lyase [Source:UniProtKB/TrEMBL;Acc:Q6Z290]
LOC_Os08g35305					10.2808	0	-10000000000	0.0308958	3771	3137.86	-0.265165	0.845496	0.978016	1.77572	0.860471	1	4.57677	0	-10000000000	0.265619	5.00051	3.0883	-0.695263	0.91785	1.90555	1.47418	-0.370293	1
LOC_Os08g36500	OS08G0468700	8	23051707	23055631	380.388	2.69093	-7.14322	0.0328482	3.12557	67.7934	4.43895	0.163009	7.82413	4.14334	-0.917137	0.789291	2.28838	9.43685	2.04398	0.55864	10.001	6.1766	-0.695263	0.882679	48.5914	4.42254	-3.45776	0.226126	Nitrate reductase [Source:UniProtKB/TrEMBL;Acc:Q6ZC33]	qAG8-1, Angaji et al., 2010
LOC_Os08g42750	OS08G0540400	8	27055091	27059334	13.2181	461.226	5.12489	0.0189349	10.9395	7.74781	-0.497685	0.876288	544.755	719.757	0.401902	0.827529	46.9119	578.007	3.62306	0.0575141	27.5028	9.26489	-1.56973	0.471174	22.8666	49.385	1.11083	0.549972	Os08g0540400 protein; Putative calcium-dependent protein kinase [Source:UniProtKB/TrEMBL;Acc:Q6ZIU9]
LOC_Os09g25100	OS09G0418500	9	15027311	15034300	158.617	3.76731	-5.39587	0.0176253	529.784	190.79	-1.47342	0.41952	265.042	19.5329	-3.76225	0.0579333	60.6422	15.3349	-1.9835	0.298606	435.878	117.355	-1.89304	0.319365	526.884	75.9202	-2.79493	0.134295
LOC_Os09g35010	OS09G0522000	9	20395262	20395703	52.8725	1624.25	4.94111	0.00100165	9.37671	2.90543	-1.69033	0.41091	1083.64	1646.68	0.603673	0.636343	899.335	2801.56	1.6393	0.188589	110.845	20.0739	-2.46514	0.0827445	3906.37	1632.65	-1.25861	0.311447		qAG9, Septiningsih et al., 2013
LOC_Os09g35020	OS09G0522100	9	20399458	20400198	2.93736	255.101	6.4404	0.00954929	1.56279	2.90543	0.894632	1	348.174	271.093	-0.361021	0.840629	130.438	270.13	1.05029	0.560003	5.00051	0	-10000000000	0.392128	593.578	381.812	-0.636573	0.722037	Dehydration-responsive element-binding protein 1H [Source:UniProtKB/Swiss-Prot;Acc:Q0J090]	qAG9, Septiningsih et al., 2013
LOC_Os09g35790	OS09G0526600	9	20591252	20595143	20.5615	469.299	4.51249	0.0114127	18.7534	21.3065	0.184139	0.96007	321.767	705.551	1.13273	0.455749	307.788	953.122	1.63072	0.269996	16.6684	33.9713	1.0272	0.545864	1622.57	608.836	-1.41416	0.338602	Heat stress transcription factor B-2c [Source:UniProtKB/Swiss-Prot;Acc:Q652B0]
LOC_Os09g39510	OS09G0568500	9	22695120	22696145	0	213.122	Inf	0.0473347	0	0	NA	NA	6.84611	2.95953	-1.20992	0.756596	13.7303	7.07764	-0.956024	0.792011	0	0	NA	NA	2.85832	50.1221	4.13221	0.225009	Germin-like protein 9-1 [Source:UniProtKB/Swiss-Prot;Acc:Q652Q1]
LOC_Os10g02340	OS10G0112500	10	836753	838994	220.302	3.22912	-6.0922	0.0481129	67.1998	67.7934	0.0126878	1	12.7142	10.6543	-0.255006	0.946636	11.4419	43.6454	1.9315	0.454798	67.5069	21.6181	-1.6428	0.542952	137.199	33.169	-2.04836	0.408022	POT family protein, expressed; Putative LeOPT1-oligopeptide transporter [Source:UniProtKB/TrEMBL;Acc:Q7G761]
LOC_Os10g25230	OS10G0391400	10	13031180	13032006	2.93736	658.203	7.80787	0.000614075	3.12557	3.87391	0.30967	1	319.811	470.565	0.557173	0.736909	252.866	1324.7	2.38922	0.144623	5.00051	6.1766	0.304737	0.999342	420.173	176.164	-1.25406	0.433745	Os10g0391400 protein; ZIM motif family protein, expressed; cDNA clone:002-134-A12, full insert sequence [Source:UniProtKB/TrEMBL;Acc:Q7XEZ6]
LOC_Os10g28240	OS10G0418100	10	14681998	14683500	11.7494	354.127	4.9136	0.0239071	9.37671	10.6532	0.184139	1	484.118	307.791	-0.653409	0.711169	94.968	843.418	3.15074	0.0897932	8.33418	3.0883	-1.43223	0.645029	278.21	112.775	-1.30273	0.461126	Os10g0418100 protein [Source:UniProtKB/TrEMBL;Acc:Q0IXN9]
LOC_Os10g31500	OS10G0452500	10	16500928	16501740	4.40604	486.521	6.78688	0.0406783	7.81393	1.93695	-2.01226	0.593586	7.82413	14.7976	0.919364	0.766649	9.15354	3.53882	-1.37106	0.693489	2.50025	41.692	4.05962	0.186657	0.952773	5.15963	2.43706	0.551923	Os10g0452500 protein; Transposon protein, putative, CACTA, En/Spm sub-class, expressed [Source:UniProtKB/TrEMBL;Acc:Q7XDT4]
LOC_Os10g31540	OS10G0453000	10	16518769	16519232	0	375.116	Inf	0.0209562	10.9395	1.93695	-2.49769	0.494587	0.978016	9.47048	3.27551	0.401939	0	0	NA	NA	0.833418	27.7947	5.05962	0.171262	0	5.89672	Inf	0.319789
LOC_Os10g31660	OS10G0454200	10	16592285	16593089	0	1291.65	Inf	0.000767299	29.6929	0.968477	-4.93826	0.0893819	0.978016	10.0624	3.36297	0.27825	2.28838	7.07764	1.62894	0.615979	0.833418	3.0883	1.8897	0.753909	11.4333	17.6902	0.629707	0.798096	Expressed protein; Os10g0454200 protein; cDNA, clone: J100060H16, full insert sequence [Source:UniProtKB/TrEMBL;Acc:Q7XDS0]
LOC_Os10g31850	OS10G0456800	10	16704970	16708495	445.01	3118.79	2.80908	0.0327652	281.301	443.562	0.65702	0.587846	1366.29	2525.66	0.886398	0.460161	1029.77	4742.02	2.20317	0.0655667	467.548	1826.73	1.96608	0.111984	1381.52	5119.09	1.88963	0.113077	CHY zinc finger family protein, expressed; Os10g0456800 protein; cDNA clone:J023077E12, full insert sequence [Source:UniProtKB/TrEMBL;Acc:Q337P2]
LOC_Os10g35630	OS10G0499400	10	19054980	19056045	772.525	6123.49	2.9867	0.0208059	803.272	865.818	0.108176	0.931105	2883.19	2280.61	-0.338246	0.767426	2574.43	7568.35	1.55572	0.17577	682.57	736.559	0.109825	0.920193	1189.06	1358.46	0.192146	0.866848	Os10g0499400 protein [Source:UniProtKB/TrEMBL;Acc:Q0IWM7]
LOC_Os10g36703	OS10G0510500	10	19631259	19632262	189.46	3542.35	4.22474	0.00547828	162.53	75.5412	-1.10537	0.415701	962.368	999.136	0.054093	0.972594	483.993	1842.54	1.92864	0.143184	129.18	279.491	1.11342	0.412405	1119.51	183.535	-2.60874	0.0549787	Os10g0510500 protein [Source:UniProtKB/TrEMBL;Acc:Q0IWG4]
LOC_Os10g39140	OS10G0536400	10	20886407	20892109	358.358	2428.3	2.76047	0.0472782	418.827	803.836	0.940548	0.459559	4109.62	1282.66	-1.67987	0.18818	543.491	1757.61	1.69329	0.17374	405.875	120.444	-1.75268	0.184429	1270.05	754.043	-0.752163	0.540534	Os10g0536400 protein; Oxidoreductase, 2OG-Fe oxygenase family protein, expressed; cDNA clone:006-304-B08, full insert sequence [Source:UniProtKB/TrEMBL;Acc:Q109B6]
LOC_Os10g39640	OS10G0542400	10	21179551	21181282	77.84	810.51	3.38025	0.0416364	71.8881	98.7846	0.458533	0.772722	645.49	911.534	0.497901	0.738375	546.924	1650.27	1.59329	0.2693	66.6735	219.269	1.71752	0.261827	132.435	409.085	1.62711	0.266529	Expansin-like A2 [Source:UniProtKB/Swiss-Prot;Acc:Q7XCL0]
LOC_Os11g06770	OS11G0168500	11	3307571	3309567	1.46868	294.926	7.64969	0.0122608	1.56279	0	-10000000000	0.843636	475.316	162.182	-1.55127	0.468884	312.364	35.3882	-3.14189	0.156326	2.50025	0	-10000000000	0.714569	0.952773	0.73709	-0.370293	1
LOC_Os11g06980	OS11G0170900	11	3463917	3467995	3012.26	245.413	-3.61756	0.0165291	3.12557	0.968477	-1.69033	0.745116	89.9775	23.0843	-1.96265	0.157014	387.881	424.658	0.130687	0.920386	125.013	71.0308	-0.815558	0.564207	4743.86	1411.53	-1.7488	0.180775
LOC_Os11g10520	OS11G0210600	11	5755644	5758642	944.361	64.0443	-3.8822	0.0391183	343.813	896.81	1.38318	0.401122	58.6809	49.72	-0.239065	0.889778	13.7303	69.5968	2.34166	0.177576	205.854	412.288	1.00203	0.542416	266.777	312.526	0.228345	0.887759	Os11g0210600 protein [Source:UniProtKB/TrEMBL;Acc:Q0ITW6]
LOC_Os11g18366	OS11G0286800	11	10352224	10376610	2449.76	169.529	-3.85304	0.0249386	15.6279	4.84238	-1.69033	0.385064	62.593	37.29	-0.747212	0.628033	60.6422	87.2909	0.525509	0.730009	290.03	339.713	0.228115	0.87455	1326.26	443.728	-1.57962	0.283502	Os11g0286800 protein [Source:UniProtKB/TrEMBL;Acc:Q0IT98]
LOC_Os11g19340	OS11G0299300	11	11110526	11112183	0	178.678	Inf	0.0316466	0	0	NA	NA	14.6702	97.0724	2.72617	0.330404	10.2977	106.165	3.3659	0.229561	0	0	NA	NA	65.7414	51.5963	-0.349534	0.896457	Lipase class 3 family protein, putative, expressed; Lipase, putative; Os11g0299300 protein [Source:UniProtKB/TrEMBL;Acc:Q53P41]
LOC_Os11g41710	OS11G0635500	11	25040876	25042999	1277.75	4.3055	-8.21321	0.00305256	12.5023	29.0543	1.21656	0.613426	5.86809	0.591905	-3.30945	0.308007	1.14419	0	-10000000000	1	0.833418	13.8973	4.05962	0.184648	82.8913	4.42254	-4.22827	0.0725694	Cytochrome P450 family protein, expressed; Os11g0635500 protein; cDNA clone:J013112D07, full insert sequence [Source:UniProtKB/TrEMBL;Acc:Q2R0R2]	qAG11, Jiang et al., 2006; qAG11, Baltazar et al., 2014
LOC_Os11g44940	OS11G0673100	11	27200382	27202904	170.367	1468.71	3.10784	0.0309446	326.622	373.832	0.194767	0.886846	814.687	2306.65	1.50148	0.25115	437.081	2228.28	2.34995	0.0711432	231.69	603.762	1.38178	0.296033	802.235	2155.25	1.42576	0.263563	Os11g0673100 protein; Seed maturation protein PM27, putative, expressed; cDNA clone:001-208-D05, full insert sequence; cDNA clone:J013153K10, full insert sequence [Source:UniProtKB/TrEMBL;Acc:Q2QZT1]	qAG11, Baltazar et al., 2014
LOC_Os12g01400	OS12G0104900	12	260424	261044	0	138.314	Inf	0.0494189	4.68836	0.968477	-2.27529	0.665444	92.9115	21.3086	-2.12442	0.457087	1.14419	119.14	6.70219	0.0649279	0	1.54415	Inf	0.834294	3.81109	27.2723	2.83916	0.359884	Probable calcium-binding protein CML25/26 [Source:UniProtKB/Swiss-Prot;Acc:Q2QYW1]
LOC_Os12g05260	OS12G0147800	12	2338072	2339170	655.031	5288.76	3.0133	0.0162934	1486.21	1864.32	0.327011	0.775781	4404.01	10595.7	1.26659	0.268177	3422.28	6576.3	0.94232	0.391743	1091.78	2382.62	1.12587	0.327649	595.483	1767.54	1.56961	0.163632	Phytosulfokines 5 Phytosulfokine-alpha Phytosulfokine-beta [Source:UniProtKB/Swiss-Prot;Acc:O81277]
LOC_Os12g13340	OS12G0236100	12	7441389	7446142	19921.2	2288.91	-3.12157	0.0142159	1628.42	1205.75	-0.43354	0.695608	1936.47	826.3	-1.22869	0.276348	3497.8	1927.48	-0.859733	0.430191	6248.97	3903.61	-0.67881	0.556442	1484.42	943.475	-0.653844	0.550913	Expressed protein [Source:UniProtKB/TrEMBL;Acc:Q2QVB9]
LOC_Os12g13890	OS12G0242100	12	7874284	7875247	1.46868	144.772	6.62312	0.00539269	0	0.968477	Inf	1	403.921	2706.78	2.74444	0.105047	151.033	260.693	0.787484	0.619594	2.50025	9.26489	1.8897	0.434511	2.85832	11.0563	1.95164	0.359232	Os12g0242100 protein; Transposon protein, putative, CACTA, En/Spm sub-class, expressed; cDNA clone:006-212-G04, full insert sequence [Source:UniProtKB/TrEMBL;Acc:Q2QV63]
LOC_Os12g21784	OS12G0406000	12	12258469	12262067	1051.57	40.364	-4.70334	0.0209986	1.56279	4.84238	1.6316	0.710361	22.4944	8.28667	-1.4407	0.450496	17.1629	9.43685	-0.862915	0.683426	401.708	75.6633	-2.40848	0.186964	847.968	456.259	-0.894159	0.593465
LOC_Os12g25450	OS12G0441300	12	14714136	14716501	135.118	0	-10000000000	0.0342278	10.9395	16.4641	0.589777	0.890522	33.2525	0	-10000000000	0.0840089	27.4606	0	-10000000000	0.14555	45.838	0	-10000000000	0.133399	6.66941	0.73709	-3.17765	0.457998	O-methyltransferase ZRP4, putative, expressed [Source:UniProtKB/TrEMBL;Acc:Q2QS38]
LOC_Os12g28710	OS12G0472300	12	16964046	16965071	0	179.754	Inf	0.00619059	0	0	NA	NA	244.504	50.9038	-2.26401	0.267379	22.8838	180.48	2.97944	0.150142	0.833418	4.63245	2.47466	0.535305	537.364	501.221	-0.100453	0.958331
LOC_Os12g33300	OS12G0518200	12	20138135	20141194	20.5615	1386.37	6.07522	0.00500434	0	0	NA	NA	189.735	804.991	2.08499	0.245809	46.9119	299.62	2.67511	0.136629	1.66684	1.54415	-0.110301	1	0.952773	5.15963	2.43706	0.430148
LOC_Os12g35630	OS12G0541500	12	21660665	21666265	18975.3	3559.03	-2.41457	0.0470607	11102	7854.35	-0.49926	0.643376	4097.89	3634.89	-0.172968	0.869939	5131.7	4057.85	-0.338724	0.748411	10078.5	6012.92	-0.745148	0.506834	16408.7	6380.99	-1.36261	0.207131	Elongation factor Ts [Source:UniProtKB/TrEMBL;Acc:Q2QP54]	qAG12, Septiningsih et al., 2013
LOC_Os12g36110	OS12G0547600	12	22133336	22136891	232.051	1991.29	3.10119	0.0323911	68.7626	277.953	2.01514	0.138633	3136.5	1491.01	-1.07286	0.408629	482.849	1537.03	1.6705	0.193539	166.684	379.861	1.18836	0.372244	720.297	775.418	0.106384	0.934546	Calmodulin-binding protein, putative, expressed [Source:UniProtKB/TrEMBL;Acc:Q2QP06]	qAG12, Septiningsih et al., 2013
LOC_Os12g36210	OS12G0548401	12	22193325	22193831	36.717	557.562	3.92461	0.032656	10.9395	15.4956	0.502315	0.843144	2298.34	339.162	-2.76055	0.096402	275.75	130.936	-1.0745	0.49107	185.852	38.6037	-2.26734	0.184945	81.9385	28.7465	-1.51116	0.35053	Os12g0548450 protein; Subtilisin-chymotrypsin inhibitor CI-1B, putative, expressed; cDNA, clone: J065025E22, full insert sequence [Source:UniProtKB/TrEMBL;Acc:Q2QNZ6]	qAG12, Septiningsih et al., 2013
LOC_Os12g36220	OS12G0548501	12	22197957	22198462	41.123	1004.26	4.61004	0.0160366	14.0651	12.5902	-0.159816	0.988214	1040.61	451.032	-1.20613	0.459083	149.889	253.615	0.758746	0.63458	273.361	58.6777	-2.21993	0.200707	130.53	176.164	0.432542	0.789902	Os12g0548650 protein [Source:UniProtKB/TrEMBL;Acc:B9GDL8]	qAG12, Septiningsih et al., 2013
LOC_Os12g41124	OS12G0604000	12	25480527	25483216	932.611	45.2077	-4.36664	0.0495731	112.521	93.9423	-0.260343	0.894306	12.7142	30.7791	1.27551	0.543229	17.1629	31.8494	0.891973	0.665812	214.189	46.3245	-2.20903	0.276226	438.276	30.2207	-3.85823	0.0593037		qAG12, Septiningsih et al., 2013
LOC_Os12g42280	OS12G0617400	12	26269318	26270792	1.46868	125.398	6.41585	0.041498	6.25114	4.84238	-0.368402	0.986783	193.647	101.808	-0.927584	0.67533	598.413	25.9513	-4.52726	0.0636608	2.50025	3.0883	0.304737	1	1.90555	7.3709	1.95164	0.527861		qAG12, Septiningsih et al., 2013
DE genes specifically regulated in IR64
LOC_Os02g37800	OS02G0590400	2	22805689	22808493	4394.29	1138.8	-1.94811	0.148118	703.254	4488.89	2.67424	0.0376021	233.746	133.771	-0.80518	0.516206	152.178	818.647	2.42749	0.0530069	1110.95	1317.16	0.24564	0.837113	939.434	1480.81	0.656525	0.585665	Os02g0590400 protein; Putative acyltransferase (46.9 kD) (1H765); cDNA clone:006-304-B04, full insert sequence; cDNA clone:J023114E18, full insert sequence [Source:UniProtKB/TrEMBL;Acc:Q6YY78]	qAG2-1, Angaji et al., 2010
LOC_Os02g44080	OS02G0658100	2	26608375	26609365	5.87472	123.245	4.39086	0.145129	87.516	0	-10000000000	0.0245781	130.076	4.14334	-4.97242	0.0778055	127.005	176.941	0.478379	0.841332	1.66684	57.1335	5.09915	0.0964447	3.81109	5.15963	0.437062	0.952703	Probable aquaporin TIP2-1 [Source:UniProtKB/Swiss-Prot;Acc:Q7XA61]	qAG2, Septiningsih et al., 2013
LOC_Os04g24600	OS04G0311400	4	14129614	14132212	1625.83	913.842	-0.831159	0.556787	203.162	1586.37	2.96502	0.0412143	157.461	144.425	-0.124671	0.927719	121.284	490.716	2.0165	0.144094	128.346	748.912	2.54475	0.0802577	905.135	863.132	-0.068551	0.959157	Os04g0311400 protein [Source:UniProtKB/TrEMBL;Acc:Q0JE83]
LOC_Os04g46880	OS04G0555300	4	27783578	27787138	1658.14	1172.17	-0.500381	0.704988	160.967	1436.25	3.15747	0.027121	311.987	355.735	0.189317	0.894061	217.397	1055.75	2.27986	0.0918652	612.562	526.555	-0.218273	0.882263	967.065	723.085	-0.419447	0.747716	OSJNBb0012E24.2 protein; Os04g0555300 protein [Source:UniProtKB/TrEMBL;Acc:Q7X8K1]
LOC_Os04g54230	OS04G0635000	4	32297571	32298126	255.55	194.824	-0.391438	0.828523	6.25114	198.538	4.98915	0.0381473	14.6702	78.7234	2.4239	0.260637	6.86515	106.165	3.95087	0.0798615	28.3362	475.598	4.06902	0.0684209	65.7414	192.38	1.54909	0.439153	OSJNBa0043L09.18 protein; Os04g0635000 protein; cDNA clone:001-105-B06, full insert sequence [Source:UniProtKB/TrEMBL;Acc:Q7XQS9]
[truncated: 947 more rows]

## Sheet: 3.3.1-57 DE genes
MSU ID	IRGSP ID	Genomic position (Gramene IRGSP-1.0)			Nipponbare				IR64				F291				F274-2a				X8391				X8753				Gene description (IRGSP 1.0)	Co-localization with reported QTL interval
[truncated: 59 more rows]

## Sheet: 3.3.2-43 DE genes
MSU ID	IRGSP ID	Genomic position (Gramene IRGSP-1.0)			Nipponbare				IR64				F291				F274-2a				X8391				X8753				Gene description (IRGSP 1.0)	Co-localization with reported QTL interval
[truncated: 45 more rows]

[truncated: 13 more sheets: 3.3.3-26 DE genes, DE in Nipponbare only, DE in IR64 only, DE in F291 only, DE in F274-2a only, DE in 8391 only, DE in 8753 only, IR64 p<0.05, Nipponbare p<0.05, F274-2a p<0.05, F291 p<0.05, 8391 p<0.05, 8753 p<0.05]
