# Supplementary material for: RNA-Seq Analysis of Diverse Rice Genotypes to Identify the Genes Controlling Coleoptile Growth during Submerged Germination
Source: Front Plant Sci. 2017 May 15;8:762. doi: 10.3389/fpls.2017.00762 (PMC5430036; doi:10.3389/fpls.2017.00762)
Supplement: Supplementary file 8 [file Table8.XLSX]

## Sheet: 工作表1
Table S8: genes constitutively expressed in five tolerant genotypes but absent in IR64
TIGR locus ID	IRGSP ID	gene description	IR64			Nipponbare			F291			F274-2a			X8391			X8753			IR64 variation	Anaerobic expression identified in other public databases
			C	T	foldchange (T/C)	C	T	foldchange (T/C)	C	T	foldchange (T/C)	C	T	foldchange (T/C)	C	T	foldchange (T/C)	C	T	foldchange (T/C)
LOC_Os01g08890		expressed protein	9.37671	5.81086	0.619712	2978.48	1383.68	0.464558	77.2632	108.319	1.40194	76.6609	139.194	1.8157	3812.89	2918.44	0.765415	4609.52	2991.11	0.648899
LOC_Os01g09220	Os01g0186900	cDNA clone:001-117-g12, full insert sequence [Source:UniProtKB/TrEMBL;Acc:B7EXU7]	50.0091	37.7706	0.755274	333.39	11721.7	35.1591	9778.2	12255.4	1.25334	2772.38	22516.3	8.12166	408.375	199.195	0.487775	11534.3	9906.49	0.858874	IR64 has < 1 kb deletion	http://rice.plantbiology.msu.edu/cgi-bin/generate_trend_plot_page.pl?experiment=E-MEXP-2267&module=turquoise&gene_feat_name=LOC_Os01g09220
LOC_Os01g15399	Os01g0258100	expressed protein	1.56279	1.93695	1.23942	342.202	233.573	0.682559	55.7469	133.771	2.39961	187.648	69.5968	0.370891	320.866	460.156	1.43411	181.027	383.287	2.11729	IR64 has 2 kb deletion	http://genevisible.com/perturbations/OS/MSU%20Locus/LOC_Os01g15399; http://rice.plantbiology.msu.edu/cgi-bin/generate_trend_plot_page.pl?experiment=E-MEXP-2267&module=turquoise&gene_feat_name=LOC_Os01g15399
LOC_Os01g52594	Os01g0725000	expressed protein	1.56279	2.90543	1.85914	118.963	358.433	3.01297	531.063	413.15	0.777968	258.587	904.758	3.49885	100.844	74.1191	0.734991	685.044	222.601	0.324944
LOC_Os01g52810	Os01g0728400	Uncharacterized protein; cDNA clone:J013001L21, full insert sequence [Source:UniProtKB/TrEMBL;Acc:B7EAF7]	3.12557	6.77934	2.16899	1981.25	2270.61	1.14605	2003.95	2486.59	1.24084	2478.32	2380.45	0.960507	2124.38	1823.64	0.858433	2252.36	2301.93	1.02201
LOC_Os01g56850	Os01g0776300	Os01g0776300 protein; Putative uncharacterized protein P0413g02.16 [Source:UniProtKB/TrEMBL;Acc:Q8LJ46]	0	1.93695	NA	152.743	307.843	2.01544	330.569	315.485	0.95437	250.578	460.046	1.83594	184.185	180.665	0.980889	185.791	166.582	0.896612	IR64 has 1 kb deletion
LOC_Os01g69904	Os01g0923400	expressed protein	1.56279	1.93695	1.23942	605.096	282.548	0.466948	386.316	460.502	1.19203	627.017	297.261	0.474087	610.896	541.996	0.887216	902.276	871.977	0.966419
LOC_Os01g71540	Os01g0942900	cDNA, clone: J100054L12, full insert sequence [Source:UniProtKB/TrEMBL;Acc:B7FA83]	6.25114	1.93695	0.309856	2941.76	2178.04	0.740387	3420.12	2213.13	0.647092	3193.44	1678.58	0.525634	1938.53	2217.4	1.14385	2030.36	1882.53	0.927189	IR64 has 8 kb deletion
LOC_Os01g71599		expressed protein	1.56279	0	0	176.242	278.243	1.57876	443.041	566.453	1.27856	326.095	230.023	0.705388	225.023	243.976	1.08423	121.002	204.911	1.69345
LOC_Os01g71630	Os01g0944200	Os01g0944200 protein; Putative uncharacterized protein P0614D08.17 [Source:UniProtKB/TrEMBL;Acc:Q5JKJ6]	15.6279	10.6532	0.681683	18562.6	11856.8	0.638745	7198.2	11763.5	1.63423	8399.52	12019	1.43092	8498.37	7526.18	0.885603	22180.6	16634.6	0.749965	IR64 has 10 kb deletion
LOC_Os01g71930	Os01g0947700	Uncharacterized protein [Source:UniProtKB/TrEMBL;Acc:B9EWF7]	0	0	NA	608.033	213.122	0.350511	77.2632	384.738	4.97958	65.219	382.192	5.86014	298.364	898.695	3.01208	463.048	893.353	1.92929	IR64 has 4 kb deletion
LOC_Os02g01870	Os02g0108400	Os02g0108400 protein; Putative uncharacterized protein P0017C12.22 [Source:UniProtKB/TrEMBL;Acc:Q6ETT3]	1.56279	0.968477	0.619712	226.177	234.65	1.03746	124.208	42.6172	0.343111	220.829	259.513	1.17518	245.025	188.386	0.768845	271.54	349.381	1.28666
LOC_Os02g23930	Os02g0435400	Putative uncharacterized protein [Source:UniProtKB/TrEMBL;Acc:B9F5F6]	0	0.968477	NA	289.33	212.046	0.732886	159.417	239.13	1.50003	54.9212	48.3639	0.880604	267.527	420.008	1.56997	416.362	468.052	1.12415	IR64 has 4 kb deletion
LOC_Os02g37254	Os02g0583900	expressed protein	3.12557	0	0	145.399	337.443	2.3208	165.285	246.824	1.49333	422.207	744.331	1.76295	325.033	577.512	1.77678	224.854	778.367	3.46165	IR64 has < 1kb deletion	http://genevisible.com/perturbations/OS/MSU%20Locus/LOC_Os02g37254
LOC_Os02g42810	Os02g0640800	Short-chain dehydrogenase/reductase protein-like; cDNA clone:006-304-D09, full insert sequence [Source:UniProtKB/TrEMBL;Acc:Q6H7C9]	1.56279	2.90543	1.85914	2981.42	1075.3	0.360666	193.647	237.354	1.2257	1088.13	1160.73	1.06673	2655.27	1323.34	0.498381	2426.71	1237.57	0.509979
LOC_Os03g08284	Os03g0180500	expressed protein	0	0	NA	1097.1	435.931	0.397348	91.9335	98.2563	1.06878	423.351	384.552	0.908351	28.3362	64.8543	2.28874	795.566	624.315	0.784744
LOC_Os03g12879		expressed protein	0	0	NA	220.302	290.621	1.31919	140.834	50.9038	0.361445	263.164	281.926	1.07129	185.019	223.902	1.21016	127.672	215.967	1.69158
LOC_Os03g30840	Os03g0422300	Os03g0422300 protein [Source:UniProtKB/TrEMBL;Acc:Q0DR36]	1.56279	3.87391	2.47885	136.587	212.046	1.55246	214.185	148.568	0.693643	162.475	150.99	0.929308	202.521	134.341	0.663344	139.105	163.634	1.17633
LOC_Os03g37730	Os03g0573750	expressed protein	1.56279	5.81086	3.71827	343.671	392.877	1.14318	537.909	425.58	0.791175	475.984	376.294	0.790561	556.723	395.302	0.710051	222.949	243.24	1.09101
LOC_Os03g37864	Os03g0575500	Os03g0575500 protein [Source:UniProtKB/TrEMBL;Acc:Q0DQP3]	7.81393	2.90543	0.371827	2113.43	2603.21	1.23175	1999.06	2481.27	1.24121	1552.67	2996.2	1.92971	2549.43	3642.65	1.42881	1938.89	2560.65	1.32068
LOC_Os03g41280	Os03g0609000	Expressed protein; Os03g0609000 protein [Source:UniProtKB/TrEMBL;Acc:Q10gY3]	0	0	NA	99.8702	69.9643	0.700552	150.614	148.568	0.986414	247.146	121.499	0.491611	232.524	97.2814	0.418372	112.427	117.197	1.04243	IR64 has 1 kb deletion
LOC_Os03g52230	Os03g0732200	Expressed protein [Source:UniProtKB/TrEMBL;Acc:Q6AVH1]	1.56279	0	0	420.042	426.782	1.01605	82.1533	50.3119	0.612415	482.849	458.867	0.950332	442.545	328.904	0.743209	494.489	417.93	0.845175
LOC_Os03g53210	Os03g0743650	Os03g0743650 protein [Source:UniProtKB/TrEMBL;Acc:C7IZg9]	3.12557	0	0	1271.88	878.859	0.690994	157.461	99.4401	0.631524	1276.92	1161.91	0.909934	2270.23	1902.39	0.837972	721.249	611.047	0.847207
LOC_Os03g57145		expressed protein	1.56279	0	0	340.734	618.377	1.81484	146.702	76.9477	0.524516	493.147	870.549	1.76529	246.692	341.257	1.38333	329.66	384.024	1.16491
LOC_Os03g57545	Os03g0789433	expressed protein	1.56279	0.968477	0.619712	1207.25	1583.35	1.31153	629.842	288.258	0.457667	1337.56	1485.12	1.11032	692.571	407.655	0.588612	578.333	427.512	0.739214
LOC_Os03g59774	Os03g0812500	expressed protein	1.56279	1.93695	1.23942	539.005	425.706	0.789799	83.1313	91.7453	1.10362	1655.65	339.727	0.205193	1827.69	679.426	0.371741	464.953	711.292	1.52981	IR64 has 4 kb deletion
LOC_Os03g60419		Expressed protein	1.56279	0	0	539.005	546.798	1.01446	424.459	1093.25	2.57563	374.151	914.195	2.44339	542.555	517.29	0.953432	286.785	511.54	1.78371
LOC_Os04g03910		expressed protein	0	0.968477	NA	110.151	166.838	1.51463	151.592	138.506	0.913672	153.322	226.484	1.47718	145.015	179.121	1.23519	79.0802	74.4461	0.9414
LOC_Os04g09580	Os04g0175300	Os04g0175300 protein; cDNA clone:J023019E13, full insert sequence; cDNA clone:J023108P15, full insert sequence [Source:UniProtKB/TrEMBL;Acc:Q0JF14]	0	12.5902	NA	691.748	474.681	0.686205	65.5271	192.369	2.93572	116.708	281.926	2.41566	170.851	747.368	4.37439	448.756	783.526	1.746
LOC_Os04g33885	Os04g0415401	Os04g0415401 protein [Source:UniProtKB/TrEMBL;Acc:B9FF41]	0	0.968477	NA	57.2785	139.39	2.43356	95.8455	205.391	2.14294	175.061	113.242	0.646871	155.016	304.197	1.96236	83.844	176.164	2.1011	IR64 has < 1kb deletion
LOC_Os04g35010	Os04g0429400	Os04g0429400 protein; cDNA clone:002-150-C12, full insert sequence [Source:UniProtKB/TrEMBL;Acc:Q0JD63]	7.81393	3.87391	0.49577	5066.94	3928.77	0.775372	4334.57	5961.67	1.37538	3177.42	4810.43	1.51394	269.194	424.641	1.57745	5566.1	5577.56	1.00206
LOC_Os04g48484		expressed protein	1.56279	3.87391	2.47885	1207.25	1982.14	1.64186	640.6	524.428	0.818651	2018.36	3320.59	1.6452	1110.95	1422.16	1.28013	1157.62	1428.48	1.23398
LOC_Os05g01140	Os05g0102000	Os05g0102000 protein; Putative uncharacterized protein P0036D10.11; cDNA clone:002-116-E07, full insert sequence [Source:UniProtKB/TrEMBL;Acc:Q9FW31]	0	0	NA	631.532	134.009	0.212196	299.273	52.0877	0.174047	163.619	342.086	2.09074	591.727	37.0596	0.0626295	790.802	151.84	0.192008
LOC_Os05g18274	Os05g0266900	Os05g0266900 protein; Putative uncharacterized protein OsJNBa0010H19.10 [Source:UniProtKB/TrEMBL;Acc:Q60DZ8]	0	0	NA	204.146	248.104	1.21532	142.79	185.266	1.29747	327.239	372.756	1.13909	190.853	197.651	1.03562	247.721	249.873	1.00869
LOC_Os05g25400	Os05g0318300	Os05g0318300 protein; Putative uncharacterized protein OsJNBb0059K16.5; cDNA clone:001-202-H01, full insert sequence [Source:UniProtKB/TrEMBL;Acc:Q5W6V8]	3.12557	1.93695	0.619712	1268.94	530.652	0.418186	171.153	121.341	0.708961	895.903	563.852	0.629367	1055.94	858.547	0.813063	2003.68	1228.73	0.613235
LOC_Os05g30720	Os05g0370100	transposon protein, putative, unclassified, expressed	0	0	NA	362.764	180.293	0.496997	35.2086	44.9848	1.27767	232.271	265.411	1.14268	212.522	311.918	1.4677	394.448	372.23	0.943674	IR64 has 5 kb deletion
LOC_Os06g51524	Os06g0731950	Os06g0731950 protein [Source:UniProtKB/TrEMBL;Acc:C7J3U7]	6.25114	3.87391	0.619712	412.699	550.565	1.33406	177.999	133.179	0.748199	656.766	811.569	1.2357	513.386	466.333	0.908348	354.432	490.902	1.38504
LOC_Os07g13234	Os07g0236200	Putative uncharacterized protein [Source:UniProtKB/TrEMBL;Acc:B9FWB3]	6.25114	5.81086	0.929568	6021.58	3053.13	0.507032	1159.93	1657.93	1.42934	2827.3	2723.71	0.963361	323.366	372.14	1.15083	1957.95	1218.41	0.622289
LOC_Os07g39390	Os07g0582700	Putative uncharacterized protein [Source:UniProtKB/TrEMBL;Acc:B9FY41]	1.56279	1.93695	1.23942	1465.74	3622	2.4711	3124.76	5718.4	1.83003	2796.41	6987.99	2.49892	53.3388	44.7803	0.839545	1423.44	2618.14	1.8393
LOC_Os07g40640	Os07g0597400	Os07g0597400 protein [Source:UniProtKB/TrEMBL;Acc:C7J4g8]	1.56279	0.968477	0.619712	258.488	712.021	2.75457	865.544	639.849	0.739245	768.897	633.448	0.82384	447.546	415.376	0.92812	465.906	512.277	1.09953
LOC_Os07g45439	Os07g0648566	expressed protein	0	0	NA	111.62	83.419	0.747351	129.098	171.061	1.32504	145.312	56.6211	0.389651	264.194	240.887	0.911783	74.3163	75.9202	1.02158	IR64 has < 1kb deletion
LOC_Os07g48280	Os07g0680600	Os07g0680600 protein; Putative uncharacterized protein OJ1205_F02.25; Putative uncharacterized protein OsJNBa0008J01.12; cDNA clone:J033117L20, full insert sequence [Source:UniProtKB/TrEMBL;Acc:Q7XHX2]	31.2557	35.8336	1.14647	499.351	3057.98	6.12391	1706.64	2594.32	1.52014	1112.15	5417.93	4.87156	830.085	455.524	0.548768	5308.85	3563.83	0.671299	IR64 has < 1kb deletion
LOC_Os08g07330		RgH1A, putative, expressed	0	1.93695	NA	468.509	205.587	0.438812	36.1866	82.8667	2.28998	77.8051	258.334	3.32027	55.0056	151.327	2.75111	209.61	295.573	1.41011
LOC_Os08g07890	Os08g0176200	Os08g0176200 protein; SERK family receptor-like protein kinase [Source:UniProtKB/TrEMBL;Acc:Q5KS47]	0	0	NA	380.388	300.847	0.790894	73.3512	41.4334	0.564863	400.467	355.061	0.886618	598.394	551.261	0.921234	483.056	458.47	0.949103	IR64 has 12 kb deletion
LOC_Os08g09520		transpOson protein, putative, unclassified, expressed	0	0.968477	NA	715.247	1263.12	1.766	350.13	269.317	0.769192	1510.33	1128.88	0.747439	100.844	80.2957	0.79624	113.38	117.197	1.03367
LOC_Os08g10400	Os08g0204632	Os08g0204632 protein; cDNA, clone: J090090P09, full insert sequence [Source:UniProtKB/TrEMBL;Acc:B7F9U5]	1.56279	0.968477	0.619712	267.3	359.509	1.34497	141.812	116.013	0.818077	829.539	590.983	0.712423	503.385	457.068	0.90799	230.571	511.54	2.21858	IR64 has 3 kb deletion
LOC_Os08g13280		expressed protein	0	2.90543	NA	571.316	1044.08	1.8275	565.293	198.88	0.351818	596.124	957.84	1.60678	201.687	206.916	1.02592	282.021	254.296	0.901692
LOC_Os08g16350	Os08g0263300	Putative uncharacterized protein B1127C04.3-2; Putative uncharacterized protein OsJNBb0005C03.34-2; cDNA clone:001-204-F06, full insert sequence [Source:UniProtKB/TrEMBL;Acc:Q6YTB2]	1.56279	0	0	779.869	861.637	1.10485	208.317	154.487	0.741596	980.573	1112.37	1.13441	1158.45	812.222	0.701128	1055.67	927.996	0.879056	IR64 has 3 kb deletion
LOC_Os08g27540	Os08g0363000	Os08g0363000 protein; Putative uncharacterized protein B1027A11.153; Putative uncharacterized protein OJ1118_F01.3; cDNA clone:002-108-A06, full insert sequence [Source:UniProtKB/TrEMBL;Acc:Q84UM0]	0	2.90543	NA	577.191	516.121	0.894195	120.296	107.727	0.895514	733.427	404.605	0.551663	735.908	696.411	0.946329	633.594	527.756	0.832956	IR64 has 4 kb deletion
LOC_Os08g28030	Os08g0367400	Os08g0367400 protein; cDNA clone:J023060D19, full insert sequence; cDNA clone:J033145K21, full insert sequence [Source:UniProtKB/TrEMBL;Acc:Q0J650]	3.12557	0.968477	0.309856	210.021	348.207	1.65796	67.4831	61.5581	0.912201	684.227	273.669	0.399968	455.046	355.154	0.780479	205.799	314.737	1.52934
LOC_Os08g32440		transpOson protein, putative, unclassified, expressed	0	1.93695	NA	672.655	231.959	0.34484	226.9	211.31	0.931293	314.653	209.97	0.667306	440.045	529.643	1.20361	667.894	407.611	0.610292
LOC_Os08g35939	Os08g0461400	Os08g0461400 protein; Putative uncharacterized protein B1111C03.5; Putative uncharacterized protein P0690E03.33; cDNA clone:J013162L18, full insert sequence [Source:UniProtKB/TrEMBL;Acc:Q6Z224]	0	0	NA	133.65	185.136	1.38523	183.867	183.491	0.997953	371.862	224.125	0.60271	292.53	242.431	0.828741	181.98	280.831	1.5432
LOC_Os08g36250	Os08g0465300	Expressed protein	3.12557	0	0	568.379	156.612	0.275542	221.032	206.575	0.934595	308.932	359.78	1.16459	314.199	416.92	1.32693	438.276	176.902	0.403631	IR64 has < 1 kb deletion	http://rice.plantbiology.msu.edu/cgi-bin/generate_trend_plot_page.pl?experiment=E-MEXP-1766&module=turquoise&gene_feat_name=LOC_Os08g36250
LOC_Os08g42320	Os08g0535100	Expressed protein	0	0.968477	NA	453.822	561.867	1.23808	468.47	716.797	1.53008	378.728	138.014	0.364415	707.572	521.922	0.737624	443.992	637.583	1.43602
LOC_Os08g44780	Os08g0561800	Expressed protein	10.9395	3.87391	0.354121	693.217	1139.34	1.64356	1004.42	1372.04	1.366	140.736	401.066	2.84978	1541.82	1310.98	0.85028	619.303	583.775	0.942633	IR64 has 1 kb deletion	http://genevisible.com/perturbations/Os/MSU%20Locus/LOC_Os08g44780; http://rice.plantbiology.msu.edu/cgi-bin/generate_trend_plot_page.pl?experiment=E-MEXP-1766&module=turquoise&gene_feat_name=LOC_Os08g44780
LOC_Os09g02814	Os09g0116600	Expressed protein	1.56279	0.968477	0.619712	602.158	827.193	1.37371	869.456	729.819	0.839397	1066.39	1049.85	0.984492	960.931	662.44	0.689373	725.06	652.324	0.899683
LOC_Os09g06634	Os09g0241700	Os09g0241700 protein [Source:UniProtKB/TrEMBL;Acc:C7J6X0]	6.25114	3.87391	0.619712	3734.85	1877.73	0.50276	971.17	2200.7	2.26603	1417.65	2209.4	1.55849	2607.77	3523.75	1.35125	3648.17	3238.77	0.88778
LOC_Os09g07640		retrotranspOson protein, putative, unclassified, expressed	0	0.968477	NA	778.4	312.687	0.401704	187.779	404.271	2.15291	136.159	312.596	2.29582	213.355	575.968	2.69957	637.405	554.291	0.869606
LOC_Os09g16760	Os09g0337300	Os09g0337300 protein; cDNA clone:J033070B14, full insert sequence [Source:UniProtKB/TrEMBL;Acc:Q0J2I9]	0	0.968477	NA	375.982	815.891	2.17003	461.623	440.969	0.955258	311.22	340.906	1.09539	784.247	1116.42	1.42356	217.232	377.39	1.73726	IR64 has 5 kb deletion
LOC_Os09g19820	Os09g0362800	cDNA clone:J013152F03, full insert sequence [Source:UniProtKB/TrEMBL;Acc:B7EEY9]	15.6279	7.74781	0.49577	1288.03	430.55	0.334269	293.405	155.079	0.52855	458.821	364.498	0.794424	660.067	213.093	0.322835	1433.92	608.836	0.424594
LOC_Os09g20390	Os09g0369400	OsTPP7; Probable trehalose-phosphate phosphatase 7 [Source:UniProtKB/Swiss-Prot;Acc:Q6H5L4]	0	0.968477	NA	321.641	862.176	2.68055	1647.96	1538.95	0.933856	700.246	5239.81	7.48282	291.696	103.458	0.354677	979.451	454.047	0.463573	IR64 has 20 kb deletion	http://rice.plantbiology.msu.edu/cgi-bin/generate_trend_plot_page.pl?experiment=E-MEXP-2267&module=turquoise&gene_feat_name=LOC_Os09g20390
LOC_Os09g20579	Os09g0372100	expressed protein	1.56279	0	0	402.418	623.759	1.55003	905.643	356.327	0.393452	702.534	635.808	0.905021	730.074	509.569	0.697969	334.423	308.841	0.923502
LOC_Os09g23894	Os09g0403967	Os09g0404400 protein [Source:UniProtKB/TrEMBL;Acc:C7J708]	1.56279	1.93695	1.23942	616.845	612.995	0.993758	347.196	186.45	0.537018	746.013	443.532	0.594536	494.217	331.992	0.671753	465.906	497.536	1.06789
LOC_Os09g25934	Os09g0428500	Putative uncharacterized protein [Source:UniProtKB/TrEMBL;Acc:B9g3Q0]	1.56279	0	0	234.989	376.731	1.60319	114.428	73.3962	0.641419	680.794	555.594	0.816097	325.033	239.343	0.736365	321.085	383.287	1.19372	IR64 has 8 kb deletion
LOC_Os09g26530	Os09g0436000	Putative uncharacterized protein [Source:UniProtKB/TrEMBL;Acc:B9g3S6]	1.56279	0	0	640.344	378.345	0.590847	54.7689	98.8482	1.80482	345.546	749.05	2.16773	221.689	401.479	1.811	1046.15	824.803	0.788422	IR64 has 12 kb deletion
LOC_Os09g26554	Os09g0436600	expressed protein	0	2.90543	NA	803.368	1085.52	1.35122	265.042	117.789	0.444416	2026.36	971.995	0.479675	1615.16	903.327	0.559279	734.588	869.029	1.18301	IR64 has 8 kb deletion
LOC_Os09g27734	Os09g0450700	expressed protein	31.2557	17.4326	0.557741	1080.95	1277.12	1.18148	355.02	271.684	0.765266	1867.32	1141.86	0.611495	1949.37	1562.68	0.801635	471.623	340.535	0.722051
LOC_Os09g27820	Os09g0451400	1-aminocyclopropane-1-carboxylate oxidase 1 (ACC oxidase) [Source:UniProtKB/Swiss-Prot;Acc:Q0J1C1]	60.9486	71.6673	1.17586	1333.56	2418.61	1.81365	3175.62	2731.64	0.860193	2167.1	10522.1	4.85538	1698.51	1125.68	0.66275	1572.08	445.202	0.283194	IR64 has 1 kb deletion	http://rice.plantbiology.msu.edu/cgi-bin/generate_trend_plot_page.pl?experiment=E-MEXP-2267&module=blue&gene_feat_name=LOC_Os09g27820
LOC_Os10g24004	Os10g0381601	Os10g0381601 protein [Source:UniProtKB/TrEMBL;Acc:C7J7D4]	9.37671	34.8652	3.71827	671.186	1405.74	2.09442	182.889	629.787	3.44355	92.6796	763.205	8.23488	2134.38	2482.99	1.16333	1775.97	2747.87	1.54725
LOC_Os10g38630	Os10g0529800	Os10g0529800 protein [Source:UniProtKB/TrEMBL;Acc:Q0IW70]	3.12557	0.968477	0.309856	1916.63	2412.15	1.25854	479.228	1179.67	2.4616	2624.78	3378.39	1.28712	2508.59	2957.05	1.17877	1628.29	2010.78	1.2349
LOC_Os10g39470	Os10g0540300	Expressed protein; Os10g0540300 protein; Putative uncharacterized protein OsJNBb0064P21.4; cDNA clone:001-039-E02, full insert sequence; cDNA clone:J013066A01, full insert sequence; cDNA clone:J023055M03, full insert sequence [Source:UniProtKB/TrEMBL;Acc:Q7XCM6]	128.148	66.8249	0.521465	3091.57	4304.96	1.39248	1426.93	1187.95	0.832527	10411	5639.7	0.541705	5855.6	4908.85	0.838317	3790.13	5021.06	1.32477	IR64 has 12 kb deletion
LOC_Os10g39510	Os10g0540900	Expressed protein; Os10g0540900 protein; cDNA clone:J023135N08, full insert sequence [Source:UniProtKB/TrEMBL;Acc:Q336W6]	1.56279	0	0	618.314	459.074	0.74246	128.12	104.175	0.813107	697.957	449.43	0.643922	495.884	538.908	1.08676	688.855	734.878	1.06681
LOC_Os10g40520	Os10g0552700	Cortical cell delineating protein, putative, expressed; Os10g0552700 protein; Putative lipid transfer protein; cDNA clone:001-111-A12, full insert sequence [Source:UniProtKB/TrEMBL;Acc:Q9FWP8]	3.12557	4.84238	1.54928	1132.35	2365.87	2.08934	271.888	4106.05	15.102	109.842	3588.36	32.6683	470.048	9130.55	19.4247	769.841	3985.44	5.17697	IR64 has < 1kb deletion	http://rice.plantbiology.msu.edu/cgi-bin/generate_trend_plot_page.pl?experiment=E-MEXP-2267&module=turquoise&gene_feat_name=LOC_Os10g40520
LOC_Os10g42150		transpOson protein, putative, unclassified, expressed	1.56279	0	0	502.288	307.305	0.61181	302.207	364.614	1.2065	377.583	434.095	1.14967	498.384	424.641	0.852035	682.186	553.554	0.811442
LOC_Os10g42730	Os10g0578050	Os10g0578100 protein; cDNA clone:J023045B04, full insert sequence [Source:UniProtKB/TrEMBL;Acc:B7EHg8]	1.56279	4.84238	3.09856	539.005	411.713	0.763839	482.162	497.792	1.03242	500.012	378.654	0.757289	615.896	512.657	0.832376	593.578	606.625	1.02198
LOC_Os11g04894	Os11g0146000	Os11g0146000 protein [Source:UniProtKB/TrEMBL;Acc:Q0IUN8]	0	0	NA	121.9	154.46	1.2671	64.549	38.4738	0.59604	252.866	142.732	0.564457	111.678	155.959	1.39651	80.9857	140.784	1.73838	IR64 has < 1kb deletion
LOC_Os11g06980	Os11g0170900	BURP domain containing protein, expressed	3.12557	0.968477	0.309856	3012.26	245.413	0.0814714	89.9775	23.0843	0.256557	387.881	424.658	1.09482	125.013	71.0308	0.568189	4743.86	1411.53	0.297548	IR64 has 12 kb deletion	http://genevisible.com/perturbations/Os/MSU%20Locus/LOC_Os11g06980; http://rice.plantbiology.msu.edu/cgi-bin/generate_trend_plot_page.pl?experiment=E-MEXP-2267&module=turquoise&gene_feat_name=LOC_Os11g06980
LOC_Os11g07100	Os11g0172150	Os11g0172133 protein [Source:UniProtKB/TrEMBL;Acc:C7J891]	0	0.968477	NA	174.773	148.54	0.849901	37.1646	39.0657	1.05115	294.057	186.378	0.633814	161.683	333.536	2.0629	193.413	283.78	1.46722	IR64 has 8 kb deletion
LOC_Os11g12000	Os11g0227200	NBS-LRR disease resistance protein, putative, expressed; Os11g0227200 protein [Source:UniProtKB/TrEMBL;Acc:Q2R8J2]	0	0.968477	NA	308.423	312.687	1.01383	48.9008	80.4991	1.64617	217.397	342.086	1.57356	79.1747	157.503	1.98931	596.436	786.475	1.31862	IR64 has 20 kb deletion
LOC_Os11g14120	Os11g0245900	Expressed protein; Os11g0245900 protein [Source:UniProtKB/TrEMBL;Acc:Q53NA6]	18.7534	10.6532	0.568069	349.546	399.335	1.14244	666.029	636.298	0.955361	447.379	369.217	0.825288	550.056	577.512	1.04991	286.785	425.301	1.483
LOC_Os11g14544	Os11g0251400	Expressed protein; cDNA clone:001-115-E06, full insert sequence [Source:UniProtKB/TrEMBL;Acc:B7E8K4]	76.5765	52.2977	0.682948	6266.85	7740.74	1.23519	4764.89	9041.94	1.89762	6515.03	12217.2	1.87523	4747.15	5765.85	1.21459	9856.44	8089.56	0.820739
LOC_Os11g15000	Os11g0256300	Expressed protein; Os11g0256300 protein; cDNA clone:J013060L21, full insert sequence [Source:UniProtKB/TrEMBL;Acc:Q53L34]	4.68836	0	0	609.502	1099.52	1.80396	993.664	1120.48	1.12762	1220.85	785.618	0.643499	858.421	1094.8	1.27537	620.255	1208.09	1.94773
LOC_Os11g15010	Os11g0256400	Os11g0256400 protein [Source:UniProtKB/TrEMBL;Acc:Q0ITH1]	0	0.968477	NA	358.358	433.241	1.20896	462.601	481.219	1.04025	680.794	395.168	0.580451	609.229	443.171	0.727429	414.456	488.69	1.17911
LOC_Os11g15230	Os11g0258900	expressed protein	3.12557	0	0	205.615	850.874	4.13819	317.855	1860.95	5.85471	260.876	1112.37	4.26398	395.04	4544.43	11.5037	228.666	1599.48	6.99486	IR64 has 1 kb deletion	http://genevisible.com/perturbations/Os/MSU%20Locus/LOC_Os11g15230; http://rice.plantbiology.msu.edu/cgi-bin/ORF_infopage.cgi?orf=LOC_Os11g15230
LOC_Os11g17290	Os11g0272800	Putative uncharacterized protein [Source:UniProtKB/TrEMBL;Acc:B9gAA1]	128.148	100.722	0.785976	12665.9	3901.86	0.30806	3195.18	3754.45	1.17504	3911.99	4524.97	1.15669	6442.32	5841.52	0.90674	14740.4	7181.47	0.487198	IR64 has 14 kb deletion
LOC_Os11g19149	Os11g0297000	Putative uncharacterized protein [Source:UniProtKB/TrEMBL;Acc:B9gAE2]	4.68836	7.74781	1.65257	428.854	849.797	1.98155	1061.15	736.33	0.6939	1225.43	937.787	0.765272	705.072	588.321	0.834412	561.183	815.221	1.45268	IR64 has 1 kb deletion
LOC_Os11g20239	Os11g0307600	Expressed protein; Os11g0307600 protein [Source:UniProtKB/TrEMBL;Acc:Q2R6F5]	3.12557	0	0	305.485	292.236	0.956627	223.966	466.421	2.08256	217.397	351.523	1.61697	258.36	390.67	1.51212	339.187	459.207	1.35384
LOC_Os11g20310	Os11g0308100	Putative uncharacterized protein [Source:UniProtKB/TrEMBL;Acc:B9gAg2]	15.6279	15.4956	0.991539	1139.7	944.518	0.828746	1029.85	1137.64	1.10467	1241.45	1360.09	1.09556	1307.63	1246.13	0.952964	1508.24	1275.17	0.845466	IR64 has 3 kb deletion
LOC_Os11g28130	Os11g0470600	expressed protein	3.12557	0	0	1011.92	1316.41	1.3009	1402.47	1087.92	0.775716	852.423	1250.38	1.46686	1300.13	949.652	0.730427	207.705	175.427	0.8446
LOC_Os11g31770	Os11g0518900	Putative uncharacterized protein [Source:UniProtKB/TrEMBL;Acc:B9gAX7]	6.25114	22.275	3.56334	2308.76	1505.85	0.652231	1702.73	1928.43	1.13255	630.45	948.403	1.50433	215.855	1176.64	5.45106	1207.16	2186.95	1.81164
LOC_Os11g47370	Os11g0696600	Os11g0696600 protein [Source:UniProtKB/TrEMBL;Acc:Q0IQZ0]	7.81393	5.81086	0.743654	2360.17	1629.09	0.690244	1361.4	1415.25	1.03955	1541.23	1278.69	0.829659	2465.25	2030.56	0.823671	2768.76	2284.24	0.825005	IR64 has 13 kb deletion
LOC_Os12g06930	Os12g0166700	expressed protein	0	0	NA	57.2785	104.946	1.83221	63.571	258.663	4.06887	73.2283	156.888	2.14245	114.178	165.224	1.44707	68.5997	112.775	1.64395
LOC_Os12g09739	Os12g0199100	NB-ARC domain containing protein, expressed; Os12g0199100 protein; cDNA clone:J013027L21, full insert sequence [Source:UniProtKB/TrEMBL;Acc:Q0IPH7]	0	0	NA	246.738	131.856	0.534396	126.164	223.74	1.77341	151.033	200.533	1.32774	253.359	274.858	1.08486	299.171	290.413	0.970728	IR64 has 20 kb deletion	https://genevisible.com/perturbations/OS/MSU%20Locus/LOC_Os12g09739
LOC_Os12g10280	Os12g0204100	aquaporin protein, putative, expressed	0	0	NA	96.9328	151.769	1.56571	228.856	272.868	1.19232	267.741	156.888	0.585968	225.023	231.622	1.02933	100.041	109.826	1.09781
LOC_Os12g12115	Os12g0222650	expressed protein	0	0	NA	211.49	92.03	0.435151	136.922	102.4	0.747867	192.224	107.344	0.558432	157.516	106.546	0.676415	239.146	156.263	0.653421	IR64 has 20 kb deletion
LOC_Os12g12690	Os12g0228500	transpOson protein, putative, Pong sub-class, expressed	1.56279	1.93695	1.23942	1509.8	957.973	0.634502	128.12	558.758	4.36121	80.0935	424.658	5.30203	1130.95	1278.56	1.13052	1124.27	1212.51	1.07849
LOC_Os12g13674	Os12g0239300	Os12g0239300 protein [Source:UniProtKB/TrEMBL;Acc:C7JAA3]	3.12557	2.90543	0.929568	10364.5	8416.71	0.812073	4670.03	7795.98	1.66937	3493.22	10785.1	3.08745	167.517	180.665	1.07849	98.1356	133.413	1.35948	IR64 has < 1kb deletion	http://rice.plantbiology.msu.edu/cgi-bin/ORF_infopage.cgi?orf=LOC_Os12g13674
LOC_Os12g14840	Os12g0250900	Expressed protein; Os12g0250900 protein; cDNA clone:002-184-D06, full insert sequence [Source:UniProtKB/TrEMBL;Acc:Q2QUW8]	6.25114	0.968477	0.154928	638.875	411.175	0.643592	353.064	518.509	1.4686	565.231	601.599	1.06434	1312.63	1428.34	1.08815	1122.37	1000.97	0.891837
LOC_Os12g15222	Os12g0254400	expressed protein	4.68836	1.93695	0.413141	819.523	576.936	0.703991	552.579	495.425	0.896568	594.98	568.57	0.955612	1662.67	1669.22	1.00394	1523.48	1286.22	0.844263	IR64 has > 1 kb deletion
LOC_Os12g15314	Os12g0255200	staphylococcal nuclease homologue, putative, expressed	0	0	NA	296.673	169.529	0.571433	168.219	107.135	0.636878	112.131	233.562	2.08294	420.876	386.037	0.917223	1065.2	438.568	0.411724	IR64 has 12 kb deletion
LOC_Os12g26850		retrotranspOson protein, putative, unclassified, expressed	0	0	NA	688.811	306.767	0.445357	197.559	249.784	1.26435	136.159	454.148	3.33543	1070.94	643.91	0.601255	28.5832	15.4789	0.541538
LOC_Os12g33160	Os12g0516300	Putative uncharacterized protein [Source:UniProtKB/TrEMBL;Acc:B9gDP2]	4.68836	3.87391	0.826283	1461.34	1250.21	0.855524	426.415	324.956	0.762065	1424.52	1775.31	1.24625	1167.62	1198.26	1.02624	1892.21	1614.96	0.853481
LOC_Os12g33165	Os12g0516350	expressed protein	1.56279	4.84238	3.09856	80.7774	389.109	4.81706	197.559	112.462	0.569257	279.183	805.671	2.88582	113.345	97.2814	0.858278	365.865	159.211	0.435164
LOC_Os12g33610	Os12g0520200	Phenylalanine ammonia-lyase [Source:UniProtKB/TrEMBL;Acc:Q2QPR0]	6.25114	0.968477	0.154928	3109.19	1398.75	0.449875	451.843	165.733	0.366794	461.109	810.389	1.75748	539.222	3641.1	6.75252	1322.45	3255.73	2.46189	IR64 has 5 kb deletion
LOC_Os12g35590	Os12g0541200	Expressed protein; cDNA clone:006-304-B12, full insert sequence; cDNA clone:J033126J24, full insert sequence [Source:UniProtKB/TrEMBL;Acc:Q2QP58]	3.12557	4.84238	1.54928	840.085	2357.8	2.80662	275.8	496.608	1.80061	1140.76	2368.65	2.07638	1534.32	3094.47	2.01683	625.972	1836.09	2.93318	IR64 has < 1kb deletion
LOC_Os12g36720	Os12g0553200	NB-ARC domain containing protein, expressed; Os12g0553200 protein [Source:UniProtKB/TrEMBL;Acc:Q2QNU4]	3.12557	0.968477	0.309856	675.592	998.875	1.47852	209.295	274.052	1.3094	620.152	1132.42	1.82604	75.8411	152.871	2.01567	759.36	1296.54	1.70741
LOC_Os12g36730	Os12g0553600	Os12g0553701 protein [Source:UniProtKB/TrEMBL;Acc:A3CHW2]	0	0	NA	428.854	344.978	0.804417	125.186	71.0286	0.567385	470.263	384.552	0.817737	287.529	752.001	2.61539	357.29	308.841	0.864398
LOC_Os12g38720	Os12g0576100	Expressed protein; Os12g0575300 protein; Os12g0576100 protein [Source:UniProtKB/TrEMBL;Acc:Q2QN78]	14.0651	16.4641	1.17057	1822.63	1088.21	0.597057	154.526	181.715	1.17595	216.252	858.753	3.97107	1078.44	1241.5	1.15119	815.574	396.554	0.486227
LOC_Os12g39440	Os12g0584200	Expressed protein; cDNA clone:J013075O22, full insert sequence [Source:UniProtKB/TrEMBL;Acc:B7ECP7]	6.25114	0.968477	0.154928	608.033	330.447	0.543468	258.196	167.509	0.648767	901.623	218.227	0.242038	554.223	358.243	0.646387	596.436	253.559	0.425123	IR64 has < 1 kb deletion
