# Supplementary material for: RNA-Seq Analysis of Diverse Rice Genotypes to Identify the Genes Controlling Coleoptile Growth during Submerged Germination
Source: Front Plant Sci. 2017 May 15;8:762. doi: 10.3389/fpls.2017.00762 (PMC5430036; doi:10.3389/fpls.2017.00762)
Supplement: Supplementary file 9 [file Table9.xlsx]

## Sheet: Sheet1
Table S9. Sucrose mobilization genes
Genotype	Gene ID	baseMean	baseMeanA (control)	baseMeanB (treatment)	foldChange	log2FoldChange	pval	Gene name
sucrose synthase (Susy)
IR64	LOC_Os06g09450	5223.95	4963.41	5484.48	1.10498	0.144025	0.898758	SuSy1
Nipponbare	LOC_Os06g09450	8501.24	6528.28	10474.2	1.60443	0.682065	0.581755
F274-2a	LOC_Os06g09450	9309.49	5447.5	13171.5	2.4179	1.27375	0.235454
F291	LOC_Os06g09450	12130.9	5363.44	18898.3	3.52355	1.81703	0.104776
X8391	LOC_Os06g09450	12991.8	7314.91	18668.8	2.55215	1.35171	0.227408
X8753	LOC_Os06g09450	13696.7	7200.11	20193.3	2.80458	1.48779	0.171402
IR64	LOC_Os03g28330	91322	115304	67340.1	0.584023	-0.775903	0.561062	SuSy2
Nipponbare	LOC_Os03g28330	57364.5	75736.9	38992.2	0.514838	-0.95781	0.495135
F274-2a	LOC_Os03g28330	67341.2	91443.8	43238.5	0.472842	-1.08057	0.40992
F291	LOC_Os03g28330	61702.8	78611.9	44793.6	0.569807	-0.811455	0.544359
X8391	LOC_Os03g28330	74296.7	106750	41843.3	0.391975	-1.35117	0.33068
X8753	LOC_Os03g28330	64854	92759.1	36948.8	0.398331	-1.32796	0.317595
IR64	LOC_Os07g42490	2.42119	0	4.84238	Inf	Inf	0.536923	SuSy3
Nipponbare	LOC_Os07g42490	18.5221	11.7494	25.2948	2.15285	1.10625	0.797985
F274-2a	LOC_Os07g42490	67.6435	88.1028	47.1842	0.535559	-0.900883	0.755446
F291	LOC_Os07g42490	46.7105	34.2306	59.1905	1.72917	0.790081	0.798885
X8391	LOC_Os07g42490	21.0427	15.8349	26.2505	1.65776	0.729234	0.823898
X8753	LOC_Os07g42490	5.48315	2.85832	8.10799	2.83663	1.50418	0.689042
ADP-Glc PPase
IR64	LOC_Os03g11050	1323.51	1439.33	1207.69	0.839067	-0.253142	0.835867
Nipponbare	LOC_Os03g11050	1158.11	1307.12	1009.1	0.772	-0.373327	0.757597
F274-2a	LOC_Os03g11050	1296.96	1639.63	954.301	0.582023	-0.780851	0.52026
F291	LOC_Os03g11050	1270.28	1577.54	963.03	0.610463	-0.712024	0.566506
X8391	LOC_Os03g11050	1113.03	1260.96	965.093	0.765363	-0.385785	0.769338
X8753	LOC_Os03g11050	1238.54	1350.08	1127.01	0.834773	-0.260544	0.83046
UTP-Glc-1-P uridylyltransferase
IR64	LOC_Os02g02560	9.23359	7.81393	10.6532	1.36337	0.447173	0.945563
Nipponbare	LOC_Os02g02560	19.4073	26.4362	12.3783	0.468233	-1.0947	0.743316
F274-2a	LOC_Os02g02560	12.7986	11.4419	14.1553	1.23714	0.30701	0.953081
F291	LOC_Os02g02560	51.0107	88.9994	13.0219	0.146315	-2.77285	0.385333
X8391	LOC_Os02g02560	23.139	30.8365	15.4415	0.500754	-0.997826	0.782891
X8753	LOC_Os02g02560	16.8086	24.7721	8.84508	0.357058	-1.48577	0.642439
Phosphoglucomutase (PGM)
IR64	LOC_Os10g11140	2050.75	2220.72	1880.78	0.846925	-0.239694	0.836297
Nipponbare	LOC_Os10g11140	1813.97	2438.01	1189.93	0.488075	-1.03482	0.409669
F274-2a	LOC_Os10g11140	2002.93	2441.71	1564.16	0.6406	-0.642504	0.577178
F291	LOC_Os10g11140	2083.8	2227.92	1939.67	0.870621	-0.199884	0.862184
X8391	LOC_Os10g11140	1424.58	1502.65	1346.5	0.89608	-0.1583	0.903979
X8753	LOC_Os10g11140	2020.59	2115.16	1926.02	0.910578	-0.135145	0.90678
Alpha-amylase
IR64	LOC_Os08g36910	5.32662	0	10.6532	Inf	Inf	0.1196	RAmy3D, alpha-amylase precursor, putative, expressed
Nipponbare	LOC_Os08g36910	204.096	2.93736	405.255	137.966	7.10817	0.000552965
F274-2a	LOC_Os08g36910	944.41	562.943	1325.88	2.35526	1.23589	0.390348
F291	LOC_Os08g36910	1482.35	1176.55	1788.15	1.51982	0.603898	0.685673
X8391	LOC_Os08g36910	26.3732	3.33367	49.4128	14.8223	3.8897	0.0339122
X8753	LOC_Os08g36910	82.9404	6.66941	159.211	23.8719	4.57724	0.00792795
IR64	LOC_Os01g51754	1313.11	1453.39	1172.83	0.806958	-0.309434	0.806839	alpha-amylase precursor, putative, expressed
Nipponbare	LOC_Os01g51754	1012.73	1308.59	716.865	0.547814	-0.868243	0.518069
F274-2a	LOC_Os01g51754	750.437	939.382	561.493	0.597726	-0.742445	0.554614
F291	LOC_Os01g51754	708.711	771.654	645.769	0.836862	-0.256938	0.838624
X8391	LOC_Os01g51754	804.697	875.923	733.471	0.837369	-0.256064	0.854299
X8753	LOC_Os01g51754	1227.63	1660.68	794.583	0.478467	-1.06351	0.401938
IR64	LOC_Os02g52700	0	0	0	NA	NA	NA	alpha-amylase precursor, putative, expressed
Nipponbare	LOC_Os02g52700	37.404	0	74.808	Inf	Inf	0.0509849
F274-2a	LOC_Os02g52700	16.697	26.3164	7.07764	0.268944	-1.89462	0.48035
F291	LOC_Os02g52700	305.989	574.095	37.8819	0.0659854	-3.92171	0.136828
X8391	LOC_Os02g52700	0	0	0	NA	NA	NA
X8753	LOC_Os02g52700	1.58202	0.952773	2.21127	2.32088	1.21467	0.908345
IR64	LOC_Os02g52710	0	0	0	NA	NA	NA	alpha-amylase precursor, putative, expressed
Nipponbare	LOC_Os02g52710	32.0221	0	64.0443	Inf	Inf	0.0119632
F274-2a	LOC_Os02g52710	137.303	274.606	0	0	#NAME?	0.000471406
F291	LOC_Os02g52710	1303.6	2605.43	1.77572	0.000681543	-10.5189	2.48034e-05
X8391	LOC_Os02g52710	0.416709	0.833418	0	0	#NAME?	1
X8753	LOC_Os02g52710	1.47418	0	2.94836	Inf	Inf	0.386078
IR64	LOC_Os04g33040	487.345	528.222	446.468	0.845228	-0.242587	0.857391	alpha-amylase precursor, putative, expressed
Nipponbare	LOC_Os04g33040	642.091	671.186	612.995	0.913301	-0.130838	0.90201
F274-2a	LOC_Os04g33040	743.505	586.971	900.039	1.53336	0.6167	0.643224
F291	LOC_Os04g33040	695.252	486.074	904.431	1.86069	0.895835	0.518893
X8391	LOC_Os04g33040	539.809	465.047	614.571	1.32152	0.402202	0.767042
X8753	LOC_Os04g33040	835.656	909.898	761.414	0.836812	-0.257025	0.847412
IR64	LOC_Os05g32710	340.895	364.129	317.66	0.872384	-0.196965	0.895267	Alpha amylase, catalytic domain containing protein, expressed
Nipponbare	LOC_Os05g32710	395.746	424.448	367.044	0.864754	-0.209638	0.870519
F274-2a	LOC_Os05g32710	290.151	268.885	311.416	1.15817	0.211853	0.888234
F291	LOC_Os05g32710	473.785	371.646	575.924	1.54966	0.631949	0.68283
X8391	LOC_Os05g32710	277.687	234.191	321.183	1.37146	0.455713	0.763671
X8753	LOC_Os05g32710	606.966	344.904	869.029	2.51963	1.33321	0.37478
IR64	LOC_Os06g49970	33.985	43.758	24.2119	0.553314	-0.853829	0.777	alpha-amylase precursor, putative, expressed
Nipponbare	LOC_Os06g49970	44.9357	70.4966	19.3747	0.274832	-1.86338	0.550971
F274-2a	LOC_Os06g49970	15.1932	9.15354	21.2329	2.31964	1.2139	0.699677
F291	LOC_Os06g49970	20.165	36.1866	4.14334	0.114499	-3.12659	0.319037
X8391	LOC_Os06g49970	11.3611	15.0015	7.72074	0.514664	-0.958298	0.807481
X8753	LOC_Os06g49970	55.9801	103.852	8.10799	0.0780723	-3.67905	0.227913
IR64	LOC_Os08g36900	0.781393	1.56279	0	0	#NAME?	0.895464	alpha-amylase precursor, putative, expressed
Nipponbare	LOC_Os08g36900	3.96346	1.46868	6.45824	4.39731	2.13662	0.796516
F274-2a	LOC_Os08g36900	1.14419	2.28838	0	0	#NAME?	0.758802
F291	LOC_Os08g36900	4.50397	7.82413	1.18381	0.151303	-2.72449	0.574682
X8391	LOC_Os08g36900	0.416709	0.833418	0	0	#NAME?	1
X8753	LOC_Os08g36900	1.90555	3.81109	0	0	#NAME?	0.499328
IR64	LOC_Os01g25510	0	0	0	NA	NA	NA	alpha-amylase isozyme C, putative, expressed
Nipponbare	LOC_Os01g25510	0	0	0	NA	NA	NA
F274-2a	LOC_Os01g25510	0	0	0	NA	NA	NA
F291	LOC_Os01g25510	0.978016	1.95603	0	0	#NAME?	0.452227
X8391	LOC_Os01g25510	0	0	0	NA	NA	NA
X8753	LOC_Os01g25510	0	0	0	NA	NA	NA
IR64	LOC_Os09g28400	0	0	0	NA	NA	NA	alpha-amylase precursor, putative, expressed
Nipponbare	LOC_Os09g28400	0	0	0	NA	NA	NA
F274-2a	LOC_Os09g28400	0	0	0	NA	NA	NA
F291	LOC_Os09g28400	0	0	0	NA	NA	NA
X8391	LOC_Os09g28400	0	0	0	NA	NA	NA
X8753	LOC_Os09g28400	0	0	0	NA	NA	NA
IR64	LOC_Os09g28420	3.31266	4.68836	1.93695	0.413141	-1.27529	0.857407	alpha-amylase precursor, putative, expressed
Nipponbare	LOC_Os09g28420	15.293	11.7494	18.8365	1.60319	0.680943	0.924348
F274-2a	LOC_Os09g28420	10.4394	11.4419	9.43685	0.824761	-0.277952	0.972796
F291	LOC_Os09g28420	12.2634	15.6483	8.87858	0.567385	-0.817601	0.834476
X8391	LOC_Os09g28420	3.27233	5.00051	1.54415	0.308798	-1.69526	0.822851
X8753	LOC_Os09g28420	12.9169	6.66941	19.1643	2.87347	1.52279	0.687924
Hexokinase
IR64	LOC_Os05g44760	1931.05	2176.96	1685.15	0.774084	-0.369438	0.757549	HXK5
Nipponbare	LOC_Os05g44760	1440.42	1490.71	1390.14	0.932534	-0.100772	0.912367
F274-2a	LOC_Os05g44760	1531.99	1887.92	1176.07	0.622944	-0.682825	0.563281
F291	LOC_Os05g44760	1474.91	2071.44	878.387	0.424047	-1.2377	0.31226
X8391	LOC_Os05g44760	1272.06	1554.33	989.799	0.636803	-0.65108	0.605691
X8753	LOC_Os05g44760	1520.08	1929.37	1110.79	0.57573	-0.796535	0.503736
IR64	LOC_Os01g53930	2331.89	2744.25	1919.52	0.69947	-0.515666	0.655967	HXK6
Nipponbare	LOC_Os01g53930	2711.1	3717.23	1704.98	0.458669	-1.12448	0.365736
F274-2a	LOC_Os01g53930	1912.79	2511.5	1314.08	0.523225	-0.934496	0.412575
F291	LOC_Os01g53930	1510.89	2261.17	760.598	0.336373	-1.57186	0.186089
X8391	LOC_Os01g53930	2232.75	2966.14	1499.37	0.505496	-0.98423	0.414203
X8753	LOC_Os01g53930	2495.91	3673.89	1317.92	0.358725	-1.47905	0.202963
IR64	LOC_Os05g09500	126.981	140.651	113.312	0.805625	-0.311819	0.865651	HXK7
Nipponbare	LOC_Os05g09500	196.426	281.986	110.867	0.393163	-1.3468	0.484785
F274-2a	LOC_Os05g09500	95.0578	69.7957	120.32	1.72389	0.785664	0.66362
F291	LOC_Os05g09500	152.124	89.9775	214.27	2.38137	1.25179	0.500568
X8391	LOC_Os05g09500	332.318	176.685	487.951	2.76171	1.46556	0.429269
X8753	LOC_Os05g09500	289.228	285.832	292.625	1.02376	0.0338839	0.987268
Invertase
IR64	LOC_Os04g45290	187.071	196.911	177.231	0.900058	-0.151911	0.928328
Nipponbare	LOC_Os04g45290	500.899	702.029	299.77	0.427006	-1.22767	0.487421
F274-2a	LOC_Os04g45290	137.823	164.764	110.883	0.672982	-0.57136	0.731349
F291	LOC_Os04g45290	129.007	233.746	24.2681	0.103823	-3.26781	0.0711894
X8391	LOC_Os04g45290	128.023	132.514	123.532	0.932221	-0.101256	0.968524
X8753	LOC_Os04g45290	511.599	830.818	192.38	0.231555	-2.11057	0.211708
