# Supplementary material for: RNA-Seq Analysis of Diverse Rice Genotypes to Identify the Genes Controlling Coleoptile Growth during Submerged Germination
Source: Front Plant Sci. 2017 May 15;8:762. doi: 10.3389/fpls.2017.00762 (PMC5430036; doi:10.3389/fpls.2017.00762)
Supplement: Supplementary file 10 [file Table10.xlsx]

## Sheet: Sheet1
Table S10. ATP and PPi- dependent enzymes
Genotype	Gene id	baseMean	baseMeanA (control)	baseMeanB (treatment)	foldChange	log2FoldChange	pval	padj
ATP-dependent phosphofructokinase (ATP-PFK)
IR64	LOC_Os01g09570	379.964	304.743	455.184	1.49366	0.578856	0.670603	1	OsPFK1
Nipponbare	LOC_Os01g09570	1334.26	1038.36	1630.17	1.56995	0.65072	0.676058	1
F274-2a	LOC_Os01g09570	657.109	224.262	1089.96	4.8602	2.28101	0.0907095	1
F291	LOC_Os01g09570	916.285	655.271	1177.3	1.79666	0.845319	0.530964	1
X8391	LOC_Os01g09570	407.935	238.358	577.512	2.42288	1.27672	0.349788	1
X8753	LOC_Os01g09570	993.471	1037.57	949.372	0.914995	-0.128164	0.921376	1
IR64	LOC_Os01g53680	1389.89	1495.59	1284.2	0.85866	-0.21984	0.855949	1	OsPFK2
Nipponbare	LOC_Os01g53680	1329.62	812.18	1847.06	2.2742	1.18536	0.391248	1
F274-2a	LOC_Os01g53680	1224.03	1054.95	1393.11	1.32056	0.401146	0.7391	1
F291	LOC_Os01g53680	1307.78	1052.34	1563.22	1.48546	0.570915	0.65	1
X8391	LOC_Os01g53680	1007.9	900.925	1114.88	1.23748	0.307403	0.800977	1
X8753	LOC_Os01g53680	1489.74	1172.86	1806.61	1.54034	0.623247	0.608385	1
IR64	LOC_Os04g39420	210.832	204.725	216.939	1.05966	0.0836015	0.970457	1	OsPFK3
Nipponbare	LOC_Os04g39420	170.142	85.1834	255.101	2.99472	1.58242	0.433105	1
F274-2a	LOC_Os04g39420	293.977	402.756	185.198	0.459828	-1.12084	0.514691	1
F291	LOC_Os04g39420	257.542	258.196	256.887	0.994929	-0.00733461	0.993771	1
X8391	LOC_Os04g39420	261.279	270.861	251.696	0.929245	-0.105869	0.964951	1
X8753	LOC_Os04g39420	142.356	56.2136	228.498	4.06481	2.02319	0.256531	1
IR64	LOC_Os05g10650	19.6997	9.37671	30.0228	3.20184	1.6789	0.368247	1	OsPFK4
Nipponbare	LOC_Os05g10650	476.351	20.5615	932.14	45.3342	5.50253	0.00387755	0.700945
F274-2a	LOC_Os05g10650	258.658	17.1629	500.153	29.1415	4.86501	0.0062825	0.885011
F291	LOC_Os05g10650	705.477	85.0874	1325.87	15.5824	3.96185	0.0205864	1
X8391	LOC_Os05g10650	170.874	6.66735	335.08	50.2569	5.65125	0.0030638	0.504116
X8753	LOC_Os05g10650	521.633	53.3553	989.912	18.5532	4.2136	0.0137766	1
IR64	LOC_Os05g44922	684.628	575.105	794.151	1.38088	0.465588	0.691431	1	OsPFK5
Nipponbare	LOC_Os05g44922	3167.72	396.543	5938.89	14.9767	3.90464	0.00293739	0.601131
F274-2a	LOC_Os05g44922	3438.24	897.047	5979.42	6.66568	2.73675	0.0209949	1
F291	LOC_Os05g44922	3413.3	913.467	5913.13	6.47329	2.6945	0.0260182	1
X8391	LOC_Os05g44922	1054.62	575.892	1533.34	2.66255	1.41281	0.232768	1
X8753	LOC_Os05g44922	3711.77	372.534	7051	18.9271	4.24238	0.00085078	0.207295
IR64	LOC_Os06g05860	553.96	501.654	606.266	1.20853	0.273259	0.84606	1	OsPFK6
Nipponbare	LOC_Os06g05860	1104.16	1656.67	551.642	0.332982	-1.58648	0.279735	1
F274-2a	LOC_Os06g05860	594.884	776.907	412.862	0.531418	-0.912081	0.491498	1
F291	LOC_Os06g05860	450.695	827.401	73.9881	0.0894223	-3.48322	0.0180381	1
X8391	LOC_Os06g05860	400.132	624.23	176.033	0.282	-1.82623	0.19921
X8753	LOC_Os06g05860	1050.68	1344.36	756.991	0.563085	-0.828574	0.533195	1
IR64	LOC_Os08g34050	265.177	345.376	184.979	0.535588	-0.900804	0.647842	1	OsPFK7
Nipponbare	LOC_Os08g34050	120.85	167.429	74.2698	0.443589	-1.17271	0.573381	1
F274-2a	LOC_Os08g34050	103.19	192.224	14.1553	0.0736394	-3.76338	0.0807367	1
F291	LOC_Os08g34050	73.5305	128.12	18.941	0.147838	-2.75791	0.188822	1
X8391	LOC_Os08g34050	151.803	254.193	49.4128	0.194391	-2.36297	0.263756	1
X8753	LOC_Os08g34050	139.114	262.013	16.216	0.06189	-4.01415	0.0628414	1
IR64	LOC_Os09g24910	521.285	515.719	526.851	1.02159	0.0308102	0.989956	1	OsPFK8
Nipponbare	LOC_Os09g24910	364.589	374.513	354.665	0.947003	-0.0785587	0.933346	1
F274-2a	LOC_Os09g24910	335.846	479.417	192.276	0.401062	-1.3181	0.379566	1
F291	LOC_Os09g24910	358.732	559.425	158.039	0.282502	-1.82367	0.241439	1
X8391	LOC_Os09g24910	373.826	475.882	271.77	0.571088	-0.808216	0.612246	1
X8753	LOC_Os09g24910	397.764	492.584	302.944	0.61501	-0.701319	0.63832	1
IR64	LOC_Os09g30240	0	0	0	NA	NA	NA	NA	OsPFK9
Nipponbare	LOC_Os09g30240	0	0	0	NA	NA	NA	NA
F274-2a	LOC_Os09g30240	0	0	0	NA	NA	NA	NA
F291	LOC_Os09g30240	0	0	0	NA	NA	NA	NA
X8391	LOC_Os09g30240	0	0	0	NA	NA	NA	NA
X8753	LOC_Os09g30240	0	0	0	NA	NA	NA	NA
IR64	LOC_Os10g26570	118.155	137.525	98.7846	0.718302	-0.477337	0.815817	1	OsPFK10
Nipponbare	LOC_Os10g26570	222.196	315.766	128.627	0.407348	-1.29567	0.544037	1
F274-2a	LOC_Os10g26570	90.2264	153.322	27.1309	0.176954	-2.49855	0.232047	1
F291	LOC_Os10g26570	76.542	138.878	14.2057	0.102289	-3.28928	0.133525	1
X8391	LOC_Os10g26570	91.1958	128.346	54.0452	0.421089	-1.2478	0.56564	1
X8753	LOC_Os10g26570	175.788	312.51	39.0658	0.125007	-2.99992	0.155044	1
PPi-dependent phosphofructokinase (PPi-PFK or PPi-PFP)
IR64	LOC_Os02g48360	4100.74	4261.72	3939.76	0.924455	-0.113325	0.917631	1	OsPFPA1
Nipponbare	LOC_Os02g48360	2198.05	2398.35	1997.75	0.832967	-0.263668	0.807038	1
F274-2a	LOC_Os02g48360	2986.57	4929.18	1043.95	0.21179	-2.23929	0.0534393	1
F291	LOC_Os02g48360	2368.33	4266.1	470.565	0.110303	-3.18045	0.00971707	1
X8391	LOC_Os02g48360	2450.28	4062.08	838.473	0.206415	-2.27638	0.058935	1
X8753	LOC_Os02g48360	2075.25	2692.54	1457.96	0.541483	-0.885012	0.432308	1
IR64	LOC_Os06g22060	843.184	739.198	947.17	1.28135	0.357664	0.785982	1	OsPFPA2
Nipponbare	LOC_Os06g22060	1928.3	3142.97	713.636	0.227058	-2.13887	0.132597	1
F274-2a	LOC_Os06g22060	479.836	398.179	561.493	1.41015	0.49585	0.693644	1
F291	LOC_Os06g22060	277.109	454.777	99.4401	0.218657	-2.19326	0.101575	1
X8391	LOC_Os06g22060	650.745	815.083	486.407	0.596757	-0.744784	0.578567	1
X8753	LOC_Os06g22060	1664.18	2678.25	650.113	0.242738	-2.04253	0.116086	1
IR64	LOC_Os08g25720	4627.73	4066.37	5189.1	1.2761	0.351743	0.751489	1	OsPFPA3
Nipponbare	LOC_Os08g25720	10570.5	3029.89	18111.1	5.97748	2.57954	0.0325728	1
F274-2a	LOC_Os08g25720	14406.6	3041.26	25772	8.47412	3.08306	0.007098	0.936655
F291	LOC_Os08g25720	15119.2	3210.83	27027.6	8.41764	3.07342	0.00849652	1
X8391	LOC_Os08g25720	6941.69	2149.39	11734	5.45923	2.4487	0.0346924	1
X8753	LOC_Os08g25720	16392.4	3775.84	29008.9	7.68277	2.94163	0.0101895	1
IR64	LOC_Os09g12650	20.03	18.7534	21.3065	1.13614	0.184139	0.982773	1	OsPFPA4
Nipponbare	LOC_Os09g12650	22.317	22.0302	22.6039	1.02604	0.0370869	1	1
F274-2a	LOC_Os09g12650	12.6924	18.3071	7.07764	0.386607	-1.37106	0.706178	1
F291	LOC_Os09g12650	16.9085	13.6922	20.1248	1.4698	0.555616	0.887846	1
X8391	LOC_Os09g12650	13.6287	24.1691	3.0883	0.127779	-2.96828	0.467073	1
X8753	LOC_Os09g12650	9.03354	11.4333	6.63381	0.580219	-0.78533	0.840458	1
IR64	LOC_Os06g13810	5803.87	5672.91	5934.83	1.04617	0.0651163	0.956183	1	OsPFPB
Nipponbare	LOC_Os06g13810	10076.3	4342.88	15809.8	3.64039	1.86409	0.118475	1
F274-2a	LOC_Os06g13810	11651.2	6314.8	16987.5	2.69011	1.42767	0.184537	1
F291	LOC_Os06g13810	11309.8	5626.52	16993	3.02016	1.59462	0.151986	1
X8391	LOC_Os06g13810	6418.77	4545.46	8292.08	1.82425	0.867307	0.432262	1
X8753	LOC_Os06g13810	12845.7	4630.48	21060.9	4.54831	2.18533	0.0486841	1
V-PPase
IR64	LOC_Os02g55890	522.802	50.0091	995.594	19.9082	4.31529	0.000523334	0.568865	OVP3
Nipponbare	LOC_Os02g55890	3383.06	48.4664	6717.65	138.604	7.11483	4.94975e-07	0.00144322
F274-2a	LOC_Os02g55890	7100.49	200.234	14000.7	69.922	6.12768	2.98543e-06	0.00622948
F291	LOC_Os02g55890	19804.9	351.108	39258.7	111.814	6.80496	5.80687e-07	0.00136142
X8391	LOC_Os02g55890	3260.85	73.3408	6448.37	87.9233	6.45817	1.96e-06	0.00211783
X8753	LOC_Os02g55890	4860.95	80.033	9641.87	120.474	6.91258	4.02278e-07	0.000800466
IR64	LOC_Os06g43660	14389.8	17040.6	11738.9	0.688878	-0.537679	0.621455	1	OVP1
Nipponbare	LOC_Os06g43660	15585.6	20269.2	10902.1	0.537862	-0.894692	0.439094	1
F274-2a	LOC_Os06g43660	6721.26	7821.7	5620.82	0.718619	-0.4767	0.654732	1
F291	LOC_Os06g43660	10533	12334.7	8731.19	0.707854	-0.498476	0.647208	1
X8391	LOC_Os06g43660	13701.8	12382.1	15021.5	1.21316	0.278771	0.795827	1
X8753	LOC_Os06g43660	11563.3	16070.4	7056.16	0.439077	-1.18745	0.274021	1
IR64	LOC_Os02g09150	5767.59	4972.78	6562.4	1.31966	0.40017	0.716475	1	OVP6
Nipponbare	LOC_Os02g09150	6529.78	6670.74	6388.82	0.957737	-0.062298	0.932568	1
F274-2a	LOC_Os02g09150	7560.1	5678.63	9441.57	1.66265	0.733484	0.488981	1
F291	LOC_Os02g09150	6487.23	5691.07	7283.39	1.27979	0.35591	0.748088	1
X8391	LOC_Os02g09150	7025.66	6098.96	7952.37	1.30389	0.382822	0.723164	1
X8753	LOC_Os02g09150	8383.54	8220.53	8546.56	1.03966	0.0561121	0.958637	1
IR64	LOC_Os06g08080	19790.6	21388.3	18192.8	0.850598	-0.23345	0.830864	1	OVP2
Nipponbare	LOC_Os06g08080	20011.7	26960.5	13062.9	0.484518	-1.04538	0.378848	1
F274-2a	LOC_Os06g08080	12747.2	14993.5	10500.9	0.700361	-0.51383	0.636078	1
F291	LOC_Os06g08080	12638.4	19726.6	5550.29	0.281361	-1.8295	0.110676	1
X8391	LOC_Os06g08080	17083.7	23600.7	10566.6	0.447724	-1.15932	0.314772	1
X8753	LOC_Os06g08080	18645.6	23904.1	13387	0.56003	-0.836425	0.446444	1
IR64	LOC_Os01g23580	5.35968	7.81393	2.90543	0.371827	-1.4273	0.78161	1	OVP4
Nipponbare	LOC_Os01g23580	12.333	11.7494	12.9165	1.09933	0.136623	1	1
F274-2a	LOC_Os01g23580	6.47013	1.14419	11.7961	10.3095	3.3659	0.482248	1
F291	LOC_Os01g23580	7.54091	12.7142	2.36762	0.186219	-2.42493	0.558565	1
X8391	LOC_Os01g23580	4.69379	1.66684	7.72074	4.63197	2.21163	0.660438	1
X8753	LOC_Os01g23580	3.90113	1.90555	5.89672	3.0945	1.62971	0.746145	1
IR64	LOC_Os05g06480	0	0	0	NA	NA	NA	NA	OVP5
Nipponbare	LOC_Os05g06480	0.538187	0	1.07637	Inf	Inf	1	1
F274-2a	LOC_Os05g06480	0	0	0	NA	NA	NA	NA
F291	LOC_Os05g06480	1.08091	0.978016	1.18381	1.21042	0.275508	1	1
X8391	LOC_Os05g06480	0.416709	0.833418	0	0	NA	1	1
X8753	LOC_Os05g06480	0.368545	0	0.73709	Inf	Inf	1	1
V-ATPase
IR64	LOC_Os02g47320	355.719	434.454	276.984	0.637545	-0.6494	0.72856	1	vacuolar ATPase G subunit, putative, expressed
Nipponbare	LOC_Os02g47320	153.953	183.585	124.321	0.677186	-0.562375	0.760024	1
F274-2a	LOC_Os02g47320	150.262	161.331	139.194	0.862782	-0.212933	0.911788	1
F291	LOC_Os02g47320	90.5527	92.9115	88.1939	0.949224	-0.0751788	0.968858	1
X8391	LOC_Os02g47320	141.309	168.351	114.267	0.678745	-0.559059	0.786024	1
X8753	LOC_Os02g47320	125.382	166.735	84.0282	0.503962	-0.988614	0.596897	1
IR64	LOC_Os04g51270	3233.34	3453.76	3012.93	0.872364	-0.196998	0.85641	1	vacuolar ATPase G subunit, putative, expressed
Nipponbare	LOC_Os04g51270	4039.33	3755.41	4323.26	1.15121	0.203147	0.891719	1
F274-2a	LOC_Os04g51270	4065.35	4279.28	3851.41	0.900015	-0.15198	0.888426	1
F291	LOC_Os04g51270	4325.91	4959.52	3692.3	0.744489	-0.425678	0.699789	1
X8391	LOC_Os04g51270	3700.76	3981.24	3420.29	0.859102	-0.219099	0.854429	1
X8753	LOC_Os04g51270	3865.46	4006.41	3724.51	0.929639	-0.105258	0.92268	1
