# Supplementary material for: RNA-Seq Analysis of Diverse Rice Genotypes to Identify the Genes Controlling Coleoptile Growth during Submerged Germination
Source: Front Plant Sci. 2017 May 15;8:762. doi: 10.3389/fpls.2017.00762 (PMC5430036; doi:10.3389/fpls.2017.00762)
Supplement: Supplementary file 11 [file Table11.xlsx]

## Sheet: Sheet1
Table S11. Cell wall related genes
Gene ID	Annotation	IR64				Nipponbare				X8391				X8753				F291				F274-2a
		Control	Treatment	log2FoldChange	pval	Control	Treatment	log2FoldChange	pval	Control	Treatment	log2FoldChange	pval	Control	Treatment	log2FoldChange	pval	Control	Treatment	log2FoldChange	pval	Control	Treatment	log2FoldChange	pval
LOC_Os01g21630	pectinacetylesterase domain containing protein, expressed	445.394	126.87	-1.81173	0.315106	778.4	26.9093	-4.85433	0.0216458	485.049	9.26489	-5.71021	0.00838646	670.752	14.7418	-5.5078	0.00747409	11.7362	4.73524	-1.30945	0.543129	13.7303	27.1309	0.982575	0.618421
LOC_Os01g66830	pectinacetylesterase domain containing protein, expressed	2820.83	1598.96	-0.818989	0.521593	1039.82	128.089	-3.02113	0.038468	1648.5	393.758	-2.06577	0.124361	1834.09	383.287	-2.25857	0.0836064	845.006	231.435	-1.86835	0.156084	845.558	218.227	-1.95407	0.129403
LOC_Os02g18650	pectinesterase, putative, expressed	0	8.71629	Inf	0.174507	1.46868	199.667	7.08694	0.00210762	15.0015	1083.99	6.1751	0.0011938	2.85832	450.362	7.29977	0.00038642	10.7582	1991.76	7.53247	0.000171144	5.72096	559.133	6.61079	0.000745368
LOC_Os08g34900	pectinesterase, putative, expressed	20.3162	45.5184	1.16382	0.488274	32.3109	475.219	3.8785	0.025113	39.1707	841.561	4.42522	0.00908295	15.2444	391.395	4.68228	0.00592084	496.832	1334.15	1.4251	0.346772	35.47	1459.17	5.36241	0.0018737
LOC_Os04g46740	pectinesterase, putative, expressed	9078.22	4342.65	-1.06383	0.34978	1699.26	1210.92	-0.488804	0.669514	4387.11	569.791	-2.94477	0.0155346	2705.88	1480.81	-0.869706	0.435497	4053.88	554.615	-2.86974	0.0170937	5207.22	1518.15	-1.7782	0.115625
LOC_Os06g09340	pectinesterase, putative, expressed	650.119	324.44	-1.00275	0.488532	975.203	234.111	-2.05851	0.195102	621.73	702.588	0.17639	0.89741	1295.77	146.681	-3.14306	0.0381409	290.471	232.619	-0.320425	0.8225	162.475	331.469	1.02865	0.469495
LOC_Os01g20980	pectinesterase, putative, expressed	6.25114	14.5272	1.21656	0.61829	19.0928	205.049	3.42487	0.0987802	10.001	108.09	3.43402	0.0861347	13.3388	35.3803	1.40731	0.457081	55.7469	1989.99	5.15772	0.011445	3.43258	121.499	5.14551	0.017909
LOC_Os04g51340	pectinacetylesterase domain containing protein, expressed	2361.37	1157.33	-1.02882	0.369701	1007.51	2665.64	1.40368	0.265396	1359.31	2716.16	0.998698	0.389808	1863.62	2867.28	0.621571	0.579527	666.029	11635.7	4.12683	0.0011544	521.752	4829.31	3.21038	0.00753812
LOC_Os10g39640	expansin precursor, putative, expressed	71.8881	98.7846	0.458533	0.772722	77.84	810.51	3.38025	0.0416364	66.6735	219.269	1.71752	0.261827	132.435	409.085	1.62711	0.266529	645.49	911.534	0.497901	0.738375	546.924	1650.27	1.59329	0.2693
LOC_Os01g60770	EXPA2, expansin precursor, putative, expressed	1047.07	5600.7	2.41925	0.0350673	3344.18	4479.33	0.421629	0.746212	1596.83	27867.3	4.12529	0.000875528	968.97	7463.77	2.94538	0.0105864	1468	2659.43	0.857263	0.442234	868.442	572.109	-0.602139	0.576317
LOC_Os02g44108	EXPB11, expansin precursor, putative, expressed	934.546	2096.75	1.16582	0.327916	1179.35	2353.49	0.996812	0.449087	1040.11	6990.36	2.74864	0.0286606	493.537	2137.56	2.11474	0.076475	2710.08	1900.61	-0.511876	0.660755	1891.35	745.511	-1.34311	0.246687
LOC_Os04g46630	expansin precursor, putative, expressed	834.527	551.063	-0.598742	0.719637	351.014	48.975	-2.84141	0.136682	252.526	18.5298	-3.76851	0.0492781	777.463	12.5305	-5.95526	0.00310978	110.516	5.32715	-4.37475	0.0254522	105.266	29.4902	-1.83573	0.289744
LOC_Os05g39990	EXPA4, expansin precursor, putative, expressed	909.541	3515.57	1.95055	0.0862823	1969.5	5391.56	1.45287	0.231933	1703.51	18381.5	3.43168	0.00459575	777.463	2742.71	1.81876	0.102079	4343.37	5791.79	0.415196	0.711613	3922.29	4790.38	0.288444	0.787997
LOC_Os10g40700	EXPB6, expansin precursor, putative, expressed	268.799	1084.69	2.01269	0.125767	420.042	1361.61	1.69671	0.228437	265.86	2870.57	3.4326	0.0136996	570.711	3702.4	2.69763	0.0402633	762.852	701.408	-0.121151	0.920714	121.284	534.362	2.13942	0.0977374
LOC_Os07g29750	Xyloglucan endotransglucosylase/hydrolase	1211.16	1128.28	-0.102269	0.926213	966.391	5391.02	2.47988	0.0495976	730.074	1803.57	1.30474	0.266951	685.997	1531.67	1.15883	0.307302	9700.94	6440.52	-0.590947	0.60373	1890.21	974.355	-0.956024	0.393748
LOC_Os11g33270	XTH, Xyloglucan endotransglucosylase/hydrolase	135.962	160.767	0.241765	0.867995	179.179	1261.51	2.81568	0.0570787	265.86	3128.45	3.5567	0.0145189	85.7496	607.362	2.82435	0.0414269	615.172	1670.95	1.44161	0.285647	228.838	1259.82	2.46082	0.0686995
LOC_Os09g23220	Xyloglucan endotransglucosylase/hydrolase	264.111	169.483	-0.639999	0.712072	91.0581	389.109	2.09532	0.285155	302.531	268.682	-0.171183	0.93455	14.2916	190.906	3.73963	0.0492105	235.702	294.769	0.322621	0.859142	480.561	108.524	-2.14671	0.218281
LOC_Os03g01800	Xyloglucan endotransglucosylase/hydrolase	795.458	657.596	-0.274585	0.838213	3123.88	516.66	-2.59605	0.090001	763.411	196.107	-1.96082	0.172335	371.582	111.301	-1.73922	0.20682	963.346	14.7976	-6.02462	0.000294031	326.095	31.8494	-3.35595	0.0226736
LOC_Os06g48160	XET, Xyloglucan endotransglucosylase/hydrolase	5505.69	2593.58	-1.08598	0.320787	3339.78	14504.7	2.11869	0.0757349	3403.68	2592.63	-0.392682	0.729968	4136.94	11646	1.4932	0.168603	10080.4	11671.2	0.211397	0.850273	3085.89	30595.4	3.30956	0.00397804
LOC_Os06g48180	XET, Xyloglucan endotransglucosylase/hydrolase	518.845	421.287	-0.300498	0.820695	963.454	1862.13	0.950664	0.531659	497.551	81.8399	-2.60397	0.0699719	700.288	128.991	-2.44068	0.0755857	429.349	411.966	-0.0596254	0.961552	295.202	2739.05	3.2139	0.0219565
