# Supplementary material for: RNA-Seq Analysis of Diverse Rice Genotypes to Identify the Genes Controlling Coleoptile Growth during Submerged Germination
Source: Front Plant Sci. 2017 May 15;8:762. doi: 10.3389/fpls.2017.00762 (PMC5430036; doi:10.3389/fpls.2017.00762)
Supplement: Supplementary file 12 [file Table12.xlsx]

## Sheet: Sheet1
Table S12. ACC oxidase
	id	baseMean	baseMeanA	baseMeanB	foldChange	log2FoldChange	pval	padj
IR64	LOC_Os01g35230	15.0005	20.3162	9.68477	0.476701	-1.06884	0.783064	1	1-aminocyclopropane-1-carboxylate oxidase homolog 1, putative, expressed
Nipponbare	LOC_Os01g35230	14.0205	10.2808	17.7602	1.72752	0.788699	0.902624	1
F274-2a	LOC_Os01g35230	14.4795	17.1629	11.7961	0.687301	-0.540987	0.898404	1
F291	LOC_Os01g35230	17.6298	29.3405	5.91905	0.201737	-2.30945	0.525724	1
X8391	LOC_Os01g35230	3.14964	1.66684	4.63245	2.77918	1.47466	0.81682	1
X8753	LOC_Os01g35230	6.82227	11.4333	2.21127	0.193406	-2.37029	0.551555	1
IR64	LOC_Os01g39860	1300.42	103.144	2497.7	24.2157	4.59787	0.000548327	0.576805	1-aminocyclopropane-1-carboxylate oxidase protein, putative, expressed
Nipponbare	LOC_Os01g39860	1536.8	503.757	2569.84	5.10135	2.35088	0.0676657	1
F274-2a	LOC_Os01g39860	2748.27	165.908	5330.64	32.1301	5.00585	0.000171247	0.0957351
F291	LOC_Os01g39860	3379.1	633.754	6124.44	9.66375	3.27258	0.0090088	1
X8391	LOC_Os01g39860	2172.65	179.185	4166.11	23.2504	4.53918	0.000681735	0.176024
X8753	LOC_Os01g39860	2156.84	219.138	4094.53	18.6847	4.22379	0.00105394	0.243666
IR64	LOC_Os02g53180	672.466	401.636	943.296	2.34864	1.23182	0.306949	1	1-aminocyclopropane-1-carboxylate oxidase protein, putative, expressed
Nipponbare	LOC_Os02g53180	3748.79	2150.15	5347.43	2.48701	1.31441	0.315825	1
F274-2a	LOC_Os02g53180	1116.4	692.236	1540.57	2.22549	1.15412	0.321152	1
F291	LOC_Os02g53180	2134.27	2009.82	2258.71	1.12384	0.168431	0.891669	1
X8391	LOC_Os02g53180	3101.13	810.083	5392.17	6.65632	2.73472	0.0305999	1
X8753	LOC_Os02g53180	636.999	668.847	605.151	0.904767	-0.144381	0.901506	1
IR64	LOC_Os03g48430	29.0325	40.6324	17.4326	0.429031	-1.22085	0.564294	1	1-aminocyclopropane-1-carboxylate oxidase homolog 4, putative, expressed
Nipponbare	LOC_Os03g48430	323.305	403.887	242.722	0.600966	-0.734644	0.704402	1
F274-2a	LOC_Os03g48430	30.9585	19.4513	42.4658	2.18319	1.12644	0.582922	1
F291	LOC_Os03g48430	26.1222	27.3844	24.86	0.907815	-0.139529	0.957313	1
X8391	LOC_Os03g48430	239.339	199.187	279.491	1.40316	0.488678	0.80001	1
X8753	LOC_Os03g48430	251.914	330.612	173.216	0.523925	-0.932568	0.62562	1
IR64	LOC_Os03g63900	217.853	170.344	265.363	1.55781	0.639517	0.708029	1	1-aminocyclopropane-1-carboxylate oxidase 2, putative, expressed
Nipponbare	LOC_Os03g63900	448.223	597.752	298.694	0.499695	-1.00088	0.560769	1
F274-2a	LOC_Os03g63900	235.124	51.4887	418.76	8.13306	3.0238	0.0807447	1
F291	LOC_Os03g63900	166.96	103.67	230.251	2.22101	1.15121	0.498175	1
X8391	LOC_Os03g63900	344.13	120.012	568.247	4.73491	2.24334	0.196997	1
X8753	LOC_Os03g63900	254.515	220.091	288.939	1.31282	0.392668	0.810917	1
IR64	LOC_Os03g64280	85.6888	109.395	61.9825	0.566594	-0.819613	0.694682	1	1-aminocyclopropane-1-carboxylate oxidase homolog 1, putative, expressed
Nipponbare	LOC_Os03g64280	193.864	301.079	86.6481	0.287792	-1.7969	0.417674	1
F274-2a	LOC_Os03g64280	68.0508	61.7864	74.3152	1.20278	0.266368	0.902911	1
F291	LOC_Os03g64280	56.5691	81.1753	31.9629	0.393751	-1.34464	0.521621	1
X8391	LOC_Os03g64280	131.86	163.35	100.37	0.614446	-0.702643	0.750758	1
X8753	LOC_Os03g64280	210.477	270.588	150.366	0.555703	-0.847614	0.672535	1
IR64	LOC_Os04g10350	98.4548	59.3859	137.524	2.31577	1.21149	0.46938	1	1-aminocyclopropane-1-carboxylate oxidase homolog 2, putative, expressed
Nipponbare	LOC_Os04g10350	694.836	199.74	1189.93	5.95739	2.57468	0.150339	1
F274-2a	LOC_Os04g10350	319.153	109.842	528.464	4.8111	2.26637	0.162066	1
F291	LOC_Os04g10350	369.901	259.174	480.627	1.85446	0.890996	0.584818	1
X8391	LOC_Os04g10350	161.969	110.845	213.093	1.92244	0.942941	0.564951	1
X8753	LOC_Os04g10350	261.347	215.327	307.366	1.42744	0.513432	0.745566	1
IR64	LOC_Os05g05670	196.392	42.1952	350.589	8.30873	3.05463	0.0716025	1	1-aminocyclopropane-1-carboxylate oxidase, putative, expressed
Nipponbare	LOC_Os05g05670	427.837	249.675	605.999	2.42714	1.27926	0.474619	1
F274-2a	LOC_Os05g05670	128.636	34.3258	222.946	6.49499	2.69933	0.0995445	1
F291	LOC_Os05g05670	413.322	414.679	411.966	0.993458	-0.00946868	0.991763	1
X8391	LOC_Os05g05670	727.58	91.676	1363.48	14.8728	3.89461	0.0254116	1
X8753	LOC_Os05g05670	168.905	219.138	118.671	0.541538	-0.884866	0.569134	1
IR64	LOC_Os05g05680	623.667	198.474	1048.86	5.28463	2.4018	0.0870564	1	1-aminocyclopropane-1-carboxylate oxidase, putative, expressed
Nipponbare	LOC_Os05g05680	1135.41	1612.61	658.203	0.40816	-1.29279	0.367987	1
F274-2a	LOC_Os05g05680	122.265	102.977	141.553	1.3746	0.459013	0.735188	1
F291	LOC_Os05g05680	974.438	1348.68	600.192	0.44502	-1.16806	0.387721	1
X8391	LOC_Os05g05680	835.911	297.53	1374.29	4.619	2.20758	0.117601	1
X8753	LOC_Os05g05680	694.025	987.073	400.977	0.406228	-1.29964	0.328995	1
IR64	LOC_Os06g14390	132.946	131.274	134.618	1.02548	0.0362932	0.996054	1	1-aminocyclopropane-1-carboxylate oxidase homolog 4, putative, expressed
Nipponbare	LOC_Os06g14390	150.543	230.583	70.5025	0.305758	-1.70954	0.448654	1
F274-2a	LOC_Os06g14390	97.3639	73.2283	121.499	1.65919	0.730476	0.724469	1
F291	LOC_Os06g14390	90.2842	132.032	48.5362	0.367609	-1.44376	0.49647	1
X8391	LOC_Os06g14390	108.01	134.18	81.8399	0.609925	-0.713297	0.753439	1
X8753	LOC_Os06g14390	111.53	164.83	58.2301	0.353274	-1.50114	0.470501	1
IR64	LOC_Os06g14400	54.6862	60.9486	48.4238	0.794502	-0.331876	0.883989	1	1-aminocyclopropane-1-carboxylate oxidase homolog 4, putative, expressed
Nipponbare	LOC_Os06g14400	95.8141	135.118	56.5096	0.418223	-1.25766	0.57252	1
F274-2a	LOC_Os06g14400	39.1681	60.6422	17.6941	0.291779	-1.77705	0.415022	1
F291	LOC_Os06g14400	45.1935	65.5271	24.86	0.379386	-1.39826	0.519093	1
X8391	LOC_Os06g14400	207.39	201.687	213.093	1.05655	0.0793603	0.96455	1
X8753	LOC_Os06g14400	229.983	280.115	179.85	0.642057	-0.639228	0.755642	1
IR64	LOC_Os06g37590	9.34366	10.9395	7.74781	0.708242	-0.497685	0.931833	1	1-aminocyclopropane-1-carboxylate oxidase protein, putative, expressed
Nipponbare	LOC_Os06g37590	5.55535	7.3434	3.76731	0.51302	-0.962913	0.84808	1
F274-2a	LOC_Os06g37590	8.09788	10.2977	5.89803	0.572751	-0.804021	0.867786	1
F291	LOC_Os06g37590	5.49472	6.84611	4.14334	0.60521	-0.724492	0.885584	1
X8391	LOC_Os06g37590	13.8	18.3352	9.26489	0.505306	-0.98477	0.831432	1
X8753	LOC_Os06g37590	6.32808	3.81109	8.84508	2.32088	1.21467	0.783906	1
IR64	LOC_Os08g30080	440.473	620.426	260.52	0.419906	-1.25186	0.431151	1	1-aminocyclopropane-1-carboxylate oxidase homolog 4, putative, expressed
Nipponbare	LOC_Os08g30080	794.026	1377.62	210.431	0.15275	-2.71076	0.125561	1
F274-2a	LOC_Os08g30080	93.2352	73.2283	113.242	1.54643	0.628938	0.6926	1
F291	LOC_Os08g30080	66.5149	62.593	70.4367	1.12531	0.170326	0.92876	1
X8391	LOC_Os08g30080	302.389	433.378	171.401	0.395499	-1.33825	0.417763	1
X8753	LOC_Os08g30080	317.888	509.734	126.042	0.247271	-2.01584	0.205876	1
IR64	LOC_Os08g30100	3.87391	0	7.74781	Inf	Inf	0.423431	1	1-aminocyclopropane-1-carboxylate oxidase homolog 1, putative, expressed
Nipponbare	LOC_Os08g30100	58.3933	0	116.787	Inf	Inf	0.0819671	1
F274-2a	LOC_Os08g30100	26.5057	2.28838	50.7231	22.1654	4.47024	0.218481	1
F291	LOC_Os08g30100	4.1306	2.93405	5.32715	1.81563	0.860471	0.873768	1
X8391	LOC_Os08g30100	9.26489	0	18.5298	Inf	Inf	0.173812	1
X8753	LOC_Os08g30100	22.6069	7.62219	37.5916	4.93186	2.30213	0.479429	1
IR64	LOC_Os08g30150	190.956	245.357	136.555	0.556557	-0.8454	0.706043	1	1-aminocyclopropane-1-carboxylate oxidase homolog 1, putative, expressed
Nipponbare	LOC_Os08g30150	150.017	192.397	107.637	0.559455	-0.837907	0.710272	1
F274-2a	LOC_Os08g30150	60.6489	44.6235	76.6744	1.71825	0.780941	0.730339	1
F291	LOC_Os08g30150	48.692	32.2745	65.1096	2.01737	1.01247	0.669042	1
X8391	LOC_Os08g30150	15.2215	15.0015	15.4415	1.02933	0.0417022	1	1
X8753	LOC_Os08g30150	42.8758	46.6859	39.0658	0.836779	-0.257082	0.916411	1
IR64	LOC_Os08g30210	83.4325	79.7021	87.1629	1.09361	0.129097	0.9685	1	1-aminocyclopropane-1-carboxylate oxidase homolog 1, putative, expressed
Nipponbare	LOC_Os08g30210	138.838	195.334	82.3426	0.421547	-1.24623	0.613368	1
F274-2a	LOC_Os08g30210	25.7743	11.4419	40.1066	3.50523	1.80951	0.468249	1
F291	LOC_Os08g30210	16.7154	12.7142	20.7167	1.62941	0.704352	0.799841	1
X8391	LOC_Os08g30210	90.3116	83.3418	97.2814	1.16726	0.223123	0.923879	1
X8753	LOC_Os08g30210	58.3453	62.883	53.8075	0.855677	-0.224862	0.928484	1
IR64	LOC_Os08g30240	0	0	0	NA	NA	NA	NA	1-aminocyclopropane-1-carboxylate oxidase homolog 1, putative, expressed
Nipponbare	LOC_Os08g30240	0.73434	1.46868	0	0	#NAME?	0.536346	1
F274-2a	LOC_Os08g30240	0	0	0	NA	NA	NA	NA
F291	LOC_Os08g30240	0	0	0	NA	NA	NA	NA
X8391	LOC_Os08g30240	0	0	0	NA	NA	NA	NA
X8753	LOC_Os08g30240	0	0	0	NA	NA	NA	NA
IR64	LOC_Os09g27750	1509.59	1951.92	1067.26	0.546775	-0.87098	0.476272	1	1-aminocyclopropane-1-carboxylate oxidase 1, putative, expressed
Nipponbare	LOC_Os09g27750	537.049	678.53	395.567	0.582977	-0.778489	0.541627	1
F274-2a	LOC_Os09g27750	462.941	613.287	312.596	0.509705	-0.972265	0.418742	1
F291	LOC_Os09g27750	5090.77	5658.8	4522.75	0.799242	-0.323297	0.787582	1
X8391	LOC_Os09g27750	508.391	565.891	450.891	0.796781	-0.327744	0.802471	1
X8753	LOC_Os09g27750	477.035	919.426	34.6432	0.0376792	-4.73009	0.000684175	0.176296
IR64	LOC_Os09g27820	66.308	60.9486	71.6673	1.17586	0.233721	0.868338	1	1-aminocyclopropane-1-carboxylate oxidase protein, putative, expressed
Nipponbare	LOC_Os09g27820	1876.09	1333.56	2418.61	1.81365	0.858896	0.512632	1
F274-2a	LOC_Os09g27820	6344.59	2167.1	10522.1	4.85538	2.27958	0.0528951	1
F291	LOC_Os09g27820	2953.63	3175.62	2731.64	0.860193	-0.217268	0.848005	1
X8391	LOC_Os09g27820	1412.1	1698.51	1125.68	0.66275	-0.593464	0.623686	1
X8753	LOC_Os09g27820	1008.64	1572.08	445.202	0.283194	-1.82014	0.11998	1
IR64	LOC_Os09g39720	6.92246	10.9395	2.90543	0.265591	-1.91272	0.646653	1	1-aminocyclopropane-1-carboxylate oxidase, putative, expressed
Nipponbare	LOC_Os09g39720	28.8581	52.8725	4.84368	0.0916107	-3.44834	0.364255	1
F274-2a	LOC_Os09g39720	1.1619	1.14419	1.17961	1.03095	0.0439758	1	1
F291	LOC_Os09g39720	4.11786	5.86809	2.36762	0.403473	-1.30945	0.767289	1
X8391	LOC_Os09g39720	41.8887	15.8349	67.9426	4.29067	2.1012	0.542037	1
X8753	LOC_Os09g39720	9.69001	0.952773	18.4272	19.3406	4.27356	0.309541	1
IR64	LOC_Os11g03510	4.09405	6.25114	1.93695	0.309856	-1.69033	0.770872	1	1-aminocyclopropane-1-carboxylate oxidase 1, putative, expressed
Nipponbare	LOC_Os11g03510	5.75151	8.81208	2.69093	0.305369	-1.71137	0.728865	1
F274-2a	LOC_Os11g03510	2.30609	3.43258	1.17961	0.34365	-1.54099	0.86563	1
F291	LOC_Os11g03510	0.978016	1.95603	0	0	#NAME?	0.640958	1
X8391	LOC_Os11g03510	3.68904	5.83393	1.54415	0.264684	-1.91766	0.787332	1
X8753	LOC_Os11g03510	0.952773	1.90555	0	0	#NAME?	0.687045	1
IR64	LOC_Os11g08380	3.60981	6.25114	0.968477	0.154928	-2.69033	0.635462	1	1-aminocyclopropane-1-carboxylate oxidase, putative, expressed
Nipponbare	LOC_Os11g08380	12.8711	11.7494	13.9929	1.19094	0.2521	1	1
F274-2a	LOC_Os11g08380	5.8272	4.57677	7.07764	1.54643	0.628938	0.926164	1
F291	LOC_Os11g08380	14.2831	4.89008	23.6762	4.84168	2.27551	0.572983	1
X8391	LOC_Os11g08380	2.31622	0	4.63245	Inf	Inf	0.493452	1
X8753	LOC_Os11g08380	1.21348	0.952773	1.47418	1.54725	0.629707	1	1
