# Supplementary material for: RNA-Seq Analysis of Diverse Rice Genotypes to Identify the Genes Controlling Coleoptile Growth during Submerged Germination
Source: Front Plant Sci. 2017 May 15;8:762. doi: 10.3389/fpls.2017.00762 (PMC5430036; doi:10.3389/fpls.2017.00762)
Supplement: Supplementary file 13 [file Table13.xlsx]

## Sheet: Table S13.  Complete set of gen
Table S13. Complete set of genes and the average log2foldchange ratio for mapman
Gene id	Control group	Treatment group	log2FoldChange
LOC_Os01g19140.1	518.763	386.314	-0.425299
LOC_Os01g10280.1	1113.53	969.365	-0.200025
LOC_Os01g01010.1	780.998	737.107	-0.0834457
LOC_Os01g01019.1	46.768	28.819	-0.698501
LOC_Os01g01030.1	481.702	391.518	-0.299063
LOC_Os01g01040.1	1194.65	1266.48	0.0842408
LOC_Os01g01050.1	549.948	656.972	0.256536
LOC_Os01g01060.1	4715.54	4372.68	-0.108904
LOC_Os01g01070.1	477.456	417.684	-0.192958
LOC_Os01g01080.1	1042.47	1190.48	0.191534
LOC_Os01g01090.1	29.0199	12.3021	-1.23814
LOC_Os01g01100.1	10.1377	2.74035	-1.8873
LOC_Os01g01110.1	12.4733	4.38048	-1.50968
LOC_Os01g01115.1	72.4212	75.8174	0.0661169
LOC_Os01g01120.1	637.968	503.937	-0.340242
LOC_Os01g01130.1	407.184	399.194	-0.0285923
LOC_Os01g01140.1	0	0	NA
LOC_Os01g01150.1	1934.46	1541.3	-0.32778
LOC_Os01g01160.1	86.7521	62.6179	-0.470325
LOC_Os01g01170.1	310.463	282.872	-0.134273
LOC_Os01g01180.1	1.51815	0.474648	-1.67738
LOC_Os01g01190.1	248.816	211.523	-0.234262
LOC_Os01g01200.1	0.24478	0.197302	-0.311081
LOC_Os01g01210.1	0	0.295953	10000
LOC_Os01g01230.1	0	0	NA
LOC_Os01g01240.1	0.158796	0.161413	0.0235846
LOC_Os01g01250.1	0.163003	0.286299	0.812627
LOC_Os01g01260.1	0	0.358014	10000
LOC_Os01g01270.1	0.843261	1.44185	0.773868
LOC_Os01g01280.1	331.639	134.297	-1.30418
LOC_Os01g01290.1	7.31827	2.94948	-1.31105
LOC_Os01g01295.1	656.503	876.214	0.416482
LOC_Os01g01302.1	2449.9	1200.34	-1.02929
LOC_Os01g01307.1	3427.76	3216.42	-0.0918122
LOC_Os01g01312.1	475.301	536.973	0.176009
LOC_Os01g01320.1	0	0	NA
LOC_Os01g01330.1	71.1989	94.0435	0.401474
LOC_Os01g01340.1	3874.88	1271.24	-1.60792
LOC_Os01g01350.1	922.965	800.05	-0.206185
LOC_Os01g01360.1	202.733	86.8243	-1.22341
LOC_Os01g01369.1	1970.19	1785.92	-0.141666
LOC_Os01g01380.1	479.3	463.919	-0.0470538
LOC_Os01g01390.1	1302.58	1080.96	-0.269063
LOC_Os01g01400.1	133.808	108.477	-0.302784
LOC_Os01g01410.1	925.546	958.023	0.0497557
LOC_Os01g01420.1	1297.13	946.743	-0.454279
LOC_Os01g01430.1	4.73188	4.35487	-0.119786
LOC_Os01g01440.1	1.38903	0	-10000
LOC_Os01g01450.1	3980.59	3063.66	-0.377727
LOC_Os01g01460.1	0	0	NA
LOC_Os01g01470.1	4.11586	4.94797	0.265644
LOC_Os01g01484.1	1126.9	950.365	-0.245808
LOC_Os01g01500.1	0	0	NA
LOC_Os01g01510.1	1430.47	1760.8	0.299744
LOC_Os01g01520.1	475.237	554.281	0.221969
LOC_Os01g01530.1	0	0	NA
LOC_Os01g01540.1	0	0.0986509	10000
LOC_Os01g01550.1	0.190699	0	-10000
LOC_Os01g01560.1	30.4342	11.8259	-1.36374
LOC_Os01g01570.1	929.192	1068.13	0.201045
LOC_Os01g01580.1	47.2633	52.3211	0.146673
LOC_Os01g01590.1	8.54216	8.66631	0.0208166
LOC_Os01g01600.1	69.2779	60.8785	-0.186463
LOC_Os01g01610.1	70.6159	96.5565	0.451381
LOC_Os01g01620.1	1568.82	1811.06	0.207147
LOC_Os01g01640.1	1435.27	1124.84	-0.351606
LOC_Os01g01650.1	2281.34	496.694	-2.19945
LOC_Os01g01660.1	772.003	161.531	-2.25679
LOC_Os01g01670.1	545.205	578.605	0.0857806
LOC_Os01g01680.1	136.766	144.331	0.0776698
LOC_Os01g01689.1	1399.38	1784.83	0.350996
LOC_Os01g01700.1	2347.4	2052.76	-0.193504
LOC_Os01g01710.1	2122.08	1146.41	-0.888354
LOC_Os01g01720.1	556.195	501.598	-0.14906
LOC_Os01g01730.1	0.163003	0	-10000
LOC_Os01g01740.1	642.4	922.66	0.522327
LOC_Os01g01760.1	55.0178	48.081	-0.194431
LOC_Os01g01770.1	5.94261	1.73107	-1.77943
LOC_Os01g01780.1	378.12	376.059	-0.00788444
LOC_Os01g01790.1	2762.65	1913.61	-0.529752
LOC_Os01g01800.1	1129.51	921.563	-0.293545
LOC_Os01g01810.1	0.163003	1.13694	2.80219
LOC_Os01g01830.1	2333.05	2130.27	-0.131181
LOC_Os01g01840.1	98.3238	0.680839	-7.17408
LOC_Os01g01850.1	0.317591	0	-10000
LOC_Os01g01860.1	0.24478	0.581551	1.24842
LOC_Os01g01870.1	594.84	932.064	0.647927
LOC_Os01g01880.1	8.39166	7.48947	-0.164093
LOC_Os01g01890.1	749.317	555.645	-0.431414
LOC_Os01g01900.1	0	0.519427	10000
LOC_Os01g01910.1	62.4963	47.325	-0.401168
LOC_Os01g01920.1	661.417	289.206	-1.19346
LOC_Os01g01925.1	12.8016	18.6019	0.539121
LOC_Os01g01930.1	4.34999	3.0991	-0.489163
LOC_Os01g01940.1	90.8601	43.1609	-1.07392
LOC_Os01g01950.1	3.15794	3.04435	-0.0528495
LOC_Os01g01960.1	4514.61	5490.51	0.282339
LOC_Os01g01970.1	401.984	184.588	-1.12283
LOC_Os01g01980.1	0	0.38495	10000
LOC_Os01g01990.1	0	0	NA
LOC_Os01g02000.1	21.9423	7.35109	-1.57768
LOC_Os01g02010.1	788.284	408.793	-0.947344
LOC_Os01g02020.1	648.441	1425.56	1.13648
LOC_Os01g02040.1	1009.39	1462.65	0.5351
LOC_Os01g02050.1	39.8534	81.9071	1.03928
LOC_Os01g02060.1	2140.65	1364.67	-0.649495
LOC_Os01g02070.1	1.12895	0.597496	-0.91798
LOC_Os01g02080.1	565.722	441.248	-0.358502
LOC_Os01g02090.1	3605.95	3194.99	-0.17457
LOC_Os01g02100.1	511.76	467.31	-0.131088
LOC_Os01g02110.1	0.326005	0.564345	0.791683
LOC_Os01g02120.1	0	0.196601	10000
LOC_Os01g02130.1	53.9406	31.6163	-0.770704
LOC_Os01g02139.1	873.642	1400.25	0.680568
LOC_Os01g02150.1	3082.44	3197.91	0.0530581
LOC_Os01g02160.1	23.872	71.9024	1.59072
LOC_Os01g02170.1	152.197	203.531	0.419311
LOC_Os01g02180.1	558.62	728.565	0.383191
LOC_Os01g02190.1	11.9903	6.17068	-0.958373
LOC_Os01g02200.1	579.243	556.804	-0.0570006
LOC_Os01g02210.1	0.403575	0	-10000
LOC_Os01g02220.1	0.24478	0.0896978	-1.44834
LOC_Os01g02230.1	0	0.382912	10000
LOC_Os01g02240.1	2.77602	5.17517	0.898586
LOC_Os01g02250.1	1.05865	1.79436	0.761243
LOC_Os01g02260.1	0	0.257358	10000
LOC_Os01g02270.1	97.5022	125.497	0.364152
LOC_Os01g02280.1	1.39668	1.64932	0.239864
LOC_Os01g02290.1	61.1004	315.893	2.37018
LOC_Os01g02300.1	127.669	500.44	1.97079
LOC_Os01g02310.1	19.0765	3.58152	-2.41315
LOC_Os01g02320.1	289.224	322.89	0.158854
LOC_Os01g02334.1	133.599	190.087	0.508751
LOC_Os01g02350.1	236.694	260.091	0.135989
LOC_Os01g02360.1	73.5591	90.8886	0.305194
LOC_Os01g02370.1	0.888927	0.807064	-0.139382
LOC_Os01g02380.1	0.435479	0.0986509	-2.1422
LOC_Os01g02390.1	596.715	584.093	-0.0308428
LOC_Os01g02400.1	148.396	117.838	-0.332647
LOC_Os01g02410.1	0	0	NA
LOC_Os01g02420.1	100.227	79.8167	-0.328506
LOC_Os01g02430.1	8.77385	18.524	1.07811
LOC_Os01g02440.1	3.09106	3.26408	0.0785742
LOC_Os01g02450.1	10.2788	8.71432	-0.238216
LOC_Os01g02460.1	4.66044	6.6411	0.510955
LOC_Os01g02470.1	1.94162	2.70505	0.478396
LOC_Os01g02480.1	0.804864	0.556016	-0.533619
LOC_Os01g02490.1	29.4263	20.493	-0.521973
LOC_Os01g02500.1	36.1215	86.0658	1.25258
LOC_Os01g02510.1	2.20302	6.74003	1.61327
LOC_Os01g02520.1	6.06542	8.91105	0.554989
LOC_Os01g02530.1	1.95824	4.03083	1.04152
LOC_Os01g02540.1	0	0.349761	10000
LOC_Os01g02550.1	1.37318	3.00037	1.12763
LOC_Os01g02560.1	44.4359	32.0751	-0.47027
LOC_Os01g02570.1	22.8755	20.7688	-0.139386
LOC_Os01g02580.1	2.8054	0.284261	-3.30292
LOC_Os01g02590.1	139.203	135.395	-0.0400077
LOC_Os01g02600.1	52.5389	35.5426	-0.563838
LOC_Os01g02610.1	40.9097	21.1681	-0.950551
LOC_Os01g02629.1	0	0	NA
LOC_Os01g02650.1	0	0	NA
LOC_Os01g02660.1	0.641862	0	-10000
LOC_Os01g02670.1	6.02741	4.46608	-0.432528
LOC_Os01g02680.1	0.158796	0.694109	2.12799
LOC_Os01g02690.1	35.5683	33.9395	-0.0676293
LOC_Os01g02700.1	169.815	163.328	-0.056189
LOC_Os01g02710.1	35.2143	15.2532	-1.20705
LOC_Os01g02720.1	1819.1	2105.44	0.210892
LOC_Os01g02730.1	45.8106	58.238	0.346278
LOC_Os01g02740.1	2.56565	2.12023	-0.275102
LOC_Os01g02750.1	36.9723	67.65	0.871646
LOC_Os01g02760.1	69.1321	66.4843	-0.056342
LOC_Os01g02770.1	53.5581	40.1196	-0.416798
LOC_Os01g02780.1	0	0	NA
LOC_Os01g02790.1	16.1635	18.2608	0.176007
LOC_Os01g02800.1	18.2045	18.6958	0.0384219
LOC_Os01g02810.1	1.71121	2.96625	0.793624
LOC_Os01g02830.1	100.439	81.1672	-0.307358
LOC_Os01g02840.1	19.3038	14.3261	-0.430239
LOC_Os01g02850.1	11.0451	10.347	-0.0941948
LOC_Os01g02860.1	48.5093	44.5331	-0.123384
LOC_Os01g02870.1	2078.17	1947.85	-0.0934357
LOC_Os01g02880.1	1945.48	1779.37	-0.128757
LOC_Os01g02884.1	1736.1	1427.5	-0.282361
LOC_Os01g02890.1	594.088	918.844	0.629143
LOC_Os01g02900.1	640.111	1972.92	1.62394
LOC_Os01g02910.1	213.725	575.135	1.42815
LOC_Os01g02920.1	257.915	971.249	1.91294
LOC_Os01g02930.1	38.8574	426.835	3.45741
LOC_Os01g02940.1	2006.3	3505.21	0.804963
LOC_Os01g02950.1	0.558163	1.26671	1.18232
LOC_Os01g02960.1	524.958	664.044	0.339076
LOC_Os01g02970.1	0.679724	0.0896978	-2.9218
LOC_Os01g02980.1	1.5717	6.88907	2.13199
LOC_Os01g02990.1	1.65405	0.122848	-3.75105
LOC_Os01g03010.1	0	0.0896978	10000
LOC_Os01g03020.1	2360.11	1259.02	-0.906554
LOC_Os01g03030.1	434.305	110.063	-1.98038
LOC_Os01g03040.1	464.414	487.588	0.0702509
LOC_Os01g03050.1	251.883	180.416	-0.481422
LOC_Os01g03060.1	2508.38	3831.64	0.611204
LOC_Os01g03070.1	6083.62	7210.97	0.245264
LOC_Os01g03080.1	9.04974	32.8622	1.86048
LOC_Os01g03090.1	909.405	1070.34	0.235079
LOC_Os01g03100.1	326.658	192.439	-0.763383
LOC_Os01g03110.1	745.891	668.249	-0.15858
LOC_Os01g03130.1	64.5391	189.318	1.55257
LOC_Os01g03144.1	3160.2	2247.62	-0.491613
LOC_Os01g03160.1	680.209	693.782	0.028505
LOC_Os01g03170.1	0.929817	4.01059	2.1088
LOC_Os01g03180.1	89.3853	49.0028	-0.867174
LOC_Os01g03190.1	15.8826	18.1989	0.196405
LOC_Os01g03200.1	3.22873	3.08128	-0.0674362
LOC_Os01g03210.1	0.381397	0.794097	1.05802
LOC_Os01g03220.1	0.381397	0.376697	-0.0178891
LOC_Os01g03230.1	4.29112	4.19746	-0.0318394
LOC_Os01g03240.1	59.7269	51.435	-0.21563
LOC_Os01g03250.1	0.399367	0.161413	-1.30696
LOC_Os01g03260.1	0	0.553355	10000
LOC_Os01g03270.1	1.2222	2.83351	1.21311
LOC_Os01g03280.1	28.737	14.9042	-0.947186
LOC_Os01g03290.1	3.477	0	-10000
LOC_Os01g03300.1	1.04717	0	-10000
LOC_Os01g03310.1	405.392	11.8957	-5.09081
LOC_Os01g03320.1	91.057	5.315	-4.09863
LOC_Os01g03330.1	371.422	660.989	0.831564
LOC_Os01g03340.1	7020.28	13153.4	0.905831
LOC_Os01g03350.1	0	0	NA
LOC_Os01g03360.1	3518.73	6813.63	0.95337
LOC_Os01g03370.1	0	0.72372	10000
LOC_Os01g03380.1	0	0.278047	10000
LOC_Os01g03390.1	634.503	2088.05	1.71845
LOC_Os01g03400.1	0	0	NA
LOC_Os01g03410.1	0	0	NA
LOC_Os01g03420.1	0	0	NA
LOC_Os01g03429.1	0.260464	0.688454	1.40227
LOC_Os01g03440.1	0.24478	0.0986509	-1.31108
LOC_Os01g03452.1	0.297699	0	-10000
LOC_Os01g03464.1	0.5444	0.161413	-1.75391
LOC_Os01g03480.1	6.11929	6.98973	0.191872
LOC_Os01g03490.1	1903.98	1809.56	-0.0733789
LOC_Os01g03500.1	133.61	112.662	-0.246038
LOC_Os01g03510.1	1384.18	1542.74	0.15646
LOC_Os01g03520.1	1219.63	1342.54	0.138519
LOC_Os01g03530.1	8.73517	22.1736	1.34394
LOC_Os01g03549.1	105.402	186.845	0.825949
LOC_Os01g03570.1	107.027	49.5911	-1.10982
LOC_Os01g03580.1	0	0.577508	10000
LOC_Os01g03590.1	0	0.0986509	10000
LOC_Os01g03600.1	0.158796	0.484238	1.60855
LOC_Os01g03610.1	0.652011	0.322826	-1.01414
LOC_Os01g03620.1	19.916	100.162	2.33033
LOC_Os01g03630.1	0.683303	39.0478	5.83657
LOC_Os01g03640.1	2.81992	49.2439	4.12622
LOC_Os01g03650.1	931.134	555.935	-0.744073
LOC_Os01g03660.1	466.79	286.553	-0.70397
LOC_Os01g03670.1	1.20229	1.33916	0.155535
LOC_Os01g03680.1	964.27	597.559	-0.690355
LOC_Os01g03690.1	179.668	340.257	0.921292
LOC_Os01g03710.1	94.2044	120.129	0.350713
LOC_Os01g03720.1	9.01961	202.518	4.48884
LOC_Os01g03740.1	115.269	196.575	0.770072
LOC_Os01g03730.1	565.033	349.448	-0.693257
LOC_Os01g03750.1	564.549	950.497	0.751583
LOC_Os01g03760.1	4180.12	4131.77	-0.0167843
LOC_Os01g03770.1	0	0	NA
LOC_Os01g03780.1	0	0	NA
LOC_Os01g03790.1	0	0	NA
LOC_Os01g03800.1	0.190699	0	-10000
LOC_Os01g03810.1	0	0	NA
LOC_Os01g03820.1	641.651	459.287	-0.482393
LOC_Os01g03830.1	64.0112	63.7164	-0.00665941
LOC_Os01g03840.1	4.51207	9.12017	1.01527
LOC_Os01g03860.1	0	0	NA
LOC_Os01g03870.1	217.574	233.087	0.0993631
LOC_Os01g03880.1	0	0	NA
LOC_Os01g03890.1	5.69981	199.865	5.13197
LOC_Os01g03900.1	8.59391	20.4431	1.25023
LOC_Os01g03914.1	364.781	496.612	0.445087
LOC_Os01g03930.1	0	0	NA
LOC_Os01g03940.1	292.447	154.419	-0.92132
LOC_Os01g03950.1	2052.11	3131.95	0.60995
LOC_Os01g03960.1	0	0	NA
LOC_Os01g03970.1	0	0	NA
LOC_Os01g03980.1	267.934	272.797	0.0259497
LOC_Os01g03989.1	0	0	NA
LOC_Os01g04000.1	0	0	NA
LOC_Os01g04005.1	0.158796	0	-10000
LOC_Os01g04010.1	371.744	247.28	-0.588166
LOC_Os01g04020.1	8764.61	14545.3	0.730794
LOC_Os01g04030.1	576.516	457.395	-0.33392
LOC_Os01g04040.1	10.7878	7.47193	-0.529853
LOC_Os01g04050.1	1444.1	1610.43	0.157272
LOC_Os01g04070.1	20.3335	33.4389	0.71767
LOC_Os01g04080.1	18.003	30.8823	0.778543
LOC_Os01g04090.1	0.953306	0.358791	-1.40979
LOC_Os01g04100.1	170.493	229.389	0.428079
LOC_Os01g04110.1	274.908	249.781	-0.138285
LOC_Os01g04120.1	118.693	181.366	0.611665
LOC_Os01g04130.1	64.5001	35.0052	-0.881735
LOC_Os01g04140.1	0.683931	1.53762	1.16878
LOC_Os01g04150.1	10.0662	11.5489	0.198238
LOC_Os01g04160.1	763.033	1238.12	0.69833
LOC_Os01g04170.1	465.527	621.264	0.416342
LOC_Os01g04180.1	0	0	NA
LOC_Os01g04190.1	2207.63	2281.96	0.0477765
LOC_Os01g04200.1	1200.54	582.114	-1.04431
LOC_Os01g04210.1	16.531	14.7268	-0.166733
LOC_Os01g04220.1	2.37822	1.66002	-0.51868
LOC_Os01g04230.1	848.551	818.651	-0.0517531
LOC_Os01g04250.1	25.955	23.7175	-0.130064
LOC_Os01g04260.1	2114.95	3524.81	0.736924
LOC_Os01g04270.1	0	0	NA
LOC_Os01g04280.1	1020.47	579.556	-0.81621
LOC_Os01g04290.1	20.2262	7.30448	-1.46937
LOC_Os01g04300.1	257.945	83.4286	-1.62845
LOC_Os01g04310.1	0.158796	0	-10000
LOC_Os01g04320.1	0.24478	0.442298	0.853532
LOC_Os01g04324.1	58.0034	35.2126	-0.720044
LOC_Os01g04330.1	849.696	1720.92	1.01816
LOC_Os01g04340.1	0.838502	1.60948	0.940705
LOC_Os01g04350.1	1423.05	995.961	-0.514828
LOC_Os01g04360.1	2.13656	0.278047	-2.94189
LOC_Os01g04370.1	11.7696	13.0947	0.153926
LOC_Os01g04380.1	45.5237	17.43	-1.38504
LOC_Os01g04390.1	88.22	19.143	-2.20429
LOC_Os01g04409.1	319.103	503.238	0.657219
LOC_Os01g04430.1	19.7488	49.7949	1.33423
LOC_Os01g04440.1	2.41498	2.97153	0.299193
LOC_Os01g04450.1	98.8943	157.769	0.673855
LOC_Os01g04460.1	58.6779	65.3228	0.154769
LOC_Os01g04470.1	1.93975	1.46527	-0.404709
LOC_Os01g04480.1	25.4703	19.6745	-0.372486
LOC_Os01g04490.1	22.5542	40.2984	0.837327
LOC_Os01g04500.1	18.4847	16.1586	-0.194026
LOC_Os01g04510.1	0	0.0986509	10000
LOC_Os01g04520.1	0.879962	1.34158	0.608417
LOC_Os01g04530.1	5.67678	18.8685	1.73283
LOC_Os01g04540.1	6.81064	2.50996	-1.44013
LOC_Os01g04550.1	28.6215	11.6348	-1.29864
LOC_Os01g04560.1	0.879962	0.748751	-0.232955
LOC_Os01g04570.1	27.2217	19.3168	-0.494897
LOC_Os01g04580.1	15.6274	86.7206	2.47229
LOC_Os01g04590.1	350.297	104.826	-1.74058
LOC_Os01g04600.1	205.198	184.74	-0.151519
LOC_Os01g04610.1	0	0	NA
LOC_Os01g04620.1	30.1722	81.9459	1.44145
LOC_Os01g04630.1	1628.38	351.836	-2.21046
LOC_Os01g04640.1	796.121	407.554	-0.965998
LOC_Os01g04650.1	1406.5	2285.19	0.70021
LOC_Os01g04660.1	4.78567	32.0933	2.74548
LOC_Os01g04670.1	31.7833	76.6637	1.27028
LOC_Os01g04680.1	0.163003	0	-10000
LOC_Os01g04690.1	4.33027	12.0155	1.47236
LOC_Os01g04699.1	0.349494	0.795468	1.18654
LOC_Os01g04710.1	2832.5	1485.26	-0.931362
LOC_Os01g04720.1	1274.81	1182.93	-0.107916
LOC_Os01g04730.1	3518.07	3669.64	0.0608557
LOC_Os01g04740.1	0	0	NA
LOC_Os01g04750.1	39.092	155.931	1.99597
LOC_Os01g04760.1	0	0	NA
LOC_Os01g04770.1	0.158796	1.03829	2.70897
LOC_Os01g04780.1	0.24478	0.0896978	-1.44834
LOC_Os01g04790.1	0	0	NA
LOC_Os01g04800.1	547.01	2263.77	2.04909
LOC_Os01g04814.1	3038.59	3713.43	0.289353
LOC_Os01g04830.1	0.163003	0.196601	0.270376
LOC_Os01g04840.1	0	0	NA
LOC_Os01g04850.1	0.277806	0	-10000
LOC_Os01g04860.1	817.327	488.004	-0.744021
LOC_Os01g04870.1	312.885	318.783	0.0269408
LOC_Os01g04880.1	1805.26	1362.49	-0.405955
LOC_Os01g04900.1	2901.5	1308.34	-1.14906
LOC_Os01g04910.1	542.735	461.389	-0.234265
LOC_Os01g04920.1	1086.46	413.039	-1.39529
LOC_Os01g04930.1	599.744	612.564	0.0305155
LOC_Os01g04950.1	1206.66	1698.78	0.493486
LOC_Os01g04960.1	0.158796	0.269093	0.760937
LOC_Os01g04970.1	0.138903	0	-10000
LOC_Os01g04980.1	0	0.358715	10000
LOC_Os01g04990.1	717.873	905.814	0.335485
LOC_Os01g05000.1	0.163003	0	-10000
LOC_Os01g05010.1	1023.51	702.622	-0.542709
LOC_Os01g05020.1	0.158796	0.637565	2.0054
LOC_Os01g05030.1	1.98195	2.98943	0.592947
LOC_Os01g05040.1	0.260464	0	-10000
LOC_Os01g05050.1	0	0.196601	10000
LOC_Os01g05060.1	3155.25	1410.79	-1.16125
LOC_Os01g05064.1	288.815	133.916	-1.10882
LOC_Os01g05070.1	2659.41	2483.48	-0.0987434
LOC_Os01g05080.1	786.791	428.206	-0.877674
LOC_Os01g05090.1	155.361	193.94	0.319989
LOC_Os01g05100.1	8.68063	6.23641	-0.477083
LOC_Os01g05105.1	35.1697	38.5914	0.133946
LOC_Os01g05120.1	0.317591	0.319449	0.00841664
LOC_Os01g05130.1	668.731	616.098	-0.118267
LOC_Os01g05140.1	368.033	381.911	0.0534019
LOC_Os01g05150.1	7.00992	5.16831	-0.439707
LOC_Os01g05160.1	0	0	NA
LOC_Os01g05170.1	0.757277	1.69039	1.15846
LOC_Os01g05180.1	49.8549	99.774	1.00093
LOC_Os01g05200.1	0	0.196601	10000
LOC_Os01g05210.1	0.403575	0	-10000
LOC_Os01g05220.1	8.53472	4.16431	-1.03527
LOC_Os01g05240.1	0	0	NA
LOC_Os01g05250.1	0.757277	1.79258	1.24315
LOC_Os01g05260.1	0	0.269093	10000
LOC_Os01g05280.1	0.48956	0.448489	-0.126412
LOC_Os01g05289.1	51.786	85.3311	0.720509
LOC_Os01g05300.1	0	0	NA
LOC_Os01g05310.1	2.38865	4.38851	0.877536
LOC_Os01g05320.1	0	0.0986509	10000
LOC_Os01g05330.1	0.260464	0	-10000
LOC_Os01g05340.1	4.61802	5.32906	0.206609
LOC_Os01g05350.1	0.383683	0.508469	0.406245
LOC_Os01g05360.1	0	0	NA
LOC_Os01g05370.1	6.29008	6.96334	0.146702
LOC_Os01g05380.1	4.6739	5.49265	0.232874
LOC_Os01g05390.1	0.24478	0.0896978	-1.44834
LOC_Os01g05400.1	0	0	NA
LOC_Os01g05410.1	0.652011	7.47122	3.51838
LOC_Os01g05420.1	2437.18	2136.29	-0.190104
LOC_Os01g05430.1	413.408	358.728	-0.204674
LOC_Os01g05440.1	23.4517	26.4915	0.175836
LOC_Os01g05450.1	2.04978	2.20915	0.108021
LOC_Os01g05460.1	15.5107	13.7859	-0.170074
LOC_Os01g05470.1	1148.53	1327.74	0.20918
LOC_Os01g05480.1	227.467	179.43	-0.342233
LOC_Os01g05490.1	14013.1	22753.4	0.699305
LOC_Os01g05500.1	3680.52	3610.58	-0.02768
LOC_Os01g05510.1	880.388	773.617	-0.18652
LOC_Os01g05520.1	3.14969	0.161413	-4.28638
LOC_Os01g05530.1	849.177	819.83	-0.0507408
LOC_Os01g05540.1	158.649	203.12	0.356497
LOC_Os01g05550.1	1.4425	0.627808	-1.20018
LOC_Os01g05560.1	811.998	752.846	-0.109121
LOC_Os01g05570.1	0	0	NA
LOC_Os01g05580.1	3.11937	2.38731	-0.385873
LOC_Os01g05585.1	2.34523	2.29655	-0.0302621
LOC_Os01g05590.1	0.833418	4.4291	2.4099
LOC_Os01g05600.1	27.9068	46.7656	0.744831
LOC_Os01g05610.1	3996.69	2150.67	-0.894021
LOC_Os01g05620.1	55.8938	85.2066	0.608276
LOC_Os01g05630.1	1984.08	1493.45	-0.409826
LOC_Os01g05640.1	30.7201	67.4263	1.13413
LOC_Os01g05650.1	897.494	1726.52	0.943895
LOC_Os01g05660.1	305.513	187.878	-0.70144
LOC_Os01g05670.1	7521.32	5858.69	-0.360409
LOC_Os01g05680.1	151.342	158.185	0.0638003
LOC_Os01g05694.1	755.201	759.24	0.00769511
LOC_Os01g05710.1	40.4921	36.516	-0.149111
LOC_Os01g05720.1	10.2419	1.50338	-2.76821
LOC_Os01g05730.1	5.7993	7.43836	0.359107
LOC_Os01g05744.1	335.803	129.734	-1.37206
LOC_Os01g05760.1	7.59508	0.358791	-4.40385
LOC_Os01g05770.1	139.399	118.517	-0.23413
LOC_Os01g05780.1	44.1076	10.98	-2.00615
LOC_Os01g05790.1	893.632	1040.43	0.219423
LOC_Os01g05800.1	5944.5	3395.43	-0.807962
LOC_Os01g05810.1	335.988	137.754	-1.28631
LOC_Os01g05820.1	423.884	68.4491	-2.63057
LOC_Os01g05830.1	946.696	719.992	-0.394919
LOC_Os01g05840.1	2790.58	1309.69	-1.09134
LOC_Os01g05850.1	5.02068	1.73468	-1.53321
LOC_Os01g05860.1	98.655	95.9782	-0.0396853
LOC_Os01g05870.1	94.6011	48.1594	-0.97404
LOC_Os01g05880.1	2.51585	0.340808	-2.88401
LOC_Os01g05890.1	1.68456	1.75597	0.0598939
LOC_Os01g05900.1	2807.53	1573.09	-0.835697
LOC_Os01g05940.1	1.21798	2.79456	1.19813
LOC_Os01g05960.1	70.5115	114.316	0.697095
LOC_Os01g05970.1	4775.77	3293.47	-0.536125
LOC_Os01g05980.1	0.301906	0.32015	0.0846501
LOC_Os01g06000.1	105.523	131.607	0.318679
LOC_Os01g06010.1	3404.39	2521.7	-0.433003
LOC_Os01g06020.1	985.611	633.681	-0.63726
LOC_Os01g06030.1	0	0.188349	10000
LOC_Os01g06040.1	0.260464	0	-10000
LOC_Os01g06050.1	96.2289	110.187	0.195413
LOC_Os01g06060.1	3.01293	5.08803	0.755942
LOC_Os01g06070.1	0	0.0986509	10000
LOC_Os01g06080.1	0.718615	0.302244	-1.24951
LOC_Os01g06090.1	0.435479	0	-10000
LOC_Os01g06100.1	0	0	NA
LOC_Os01g06110.1	0	0	NA
LOC_Os01g06120.1	0.24478	0	-10000
LOC_Os01g06130.1	5.2873	20.5362	1.95756
LOC_Os01g06140.1	0	2.47911	10000
LOC_Os01g06150.1	18.8101	37.6763	1.00215
LOC_Os01g06160.1	0.190699	0	-10000
LOC_Os01g06170.1	0.24478	0	-10000
LOC_Os01g06180.1	0	0	NA
LOC_Os01g06200.1	0.574382	1.12658	0.971863
LOC_Os01g06210.1	0	0.122848	10000
LOC_Os01g06220.1	5.33697	10.326	0.952191
LOC_Os01g06230.1	0.628463	5.16575	3.03908
LOC_Os01g06240.1	0	0.68154	10000
LOC_Os01g06250.1	0.260464	0.831357	1.67438
LOC_Os01g06260.1	0	0.122848	10000
LOC_Os01g06270.1	761.51	791.312	0.0553829
LOC_Os01g06280.1	64.2232	49.3919	-0.378821
LOC_Os01g06290.1	2999.15	2948.71	-0.0244669
LOC_Os01g06300.1	0.41926	0.295252	-0.505898
LOC_Os01g06310.1	2.29041	1.20104	-0.931317
LOC_Os01g06320.1	1.78461	3.37211	0.918039
LOC_Os01g06330.1	0	0	NA
LOC_Os01g06340.1	24.2595	11.8826	-1.0297
LOC_Os01g06350.1	3.12559	2.13924	-0.547031
LOC_Os01g06360.1	0.383683	0.0896978	-2.09677
LOC_Os01g06370.1	2.25308	0.179396	-3.65068
LOC_Os01g06380.1	0	0	NA
LOC_Os01g06390.1	0.329602	0.93195	1.49953
LOC_Os01g06400.1	0	0.196601	10000
LOC_Os01g06410.1	0.138903	0.0896978	-0.630933
LOC_Os01g06420.1	0	0	NA
LOC_Os01g06430.1	0.163003	1.06725	2.71094
LOC_Os01g06440.1	0.546686	0.834166	0.609623
LOC_Os01g06450.1	2.22426	5.68468	1.35375
LOC_Os01g06454.1	53.8836	90.1878	0.743084
LOC_Os01g06460.1	1325.73	2102.9	0.665588
LOC_Os01g06470.1	591.787	639.788	0.112515
LOC_Os01g06490.1	347.781	263.19	-0.402072
LOC_Os01g06500.1	77.4132	192.145	1.31155
LOC_Os01g06510.1	24.288	61.7121	1.34531
LOC_Os01g06520.1	54.0964	13.5444	-1.99784
LOC_Os01g06530.1	0.737384	0.0896978	-3.03927
LOC_Os01g06540.1	0.683303	0.879752	0.364571
LOC_Os01g06550.1	868.211	893.232	0.0409897
LOC_Os01g06560.1	152.769	618.815	2.01815
LOC_Os01g06570.1	0	0	NA
LOC_Os01g06580.1	2126.89	1619	-0.393642
LOC_Os01g06590.1	918.573	4223.03	2.20081
LOC_Os01g06600.1	1659.95	1886.05	0.184227
LOC_Os01g06610.1	0	0.251111	10000
LOC_Os01g06620.1	0	0	NA
LOC_Os01g06630.1	0.190699	3.67099	4.2668
LOC_Os01g06640.1	55.3939	180.336	1.70289
LOC_Os01g06650.1	0	0	NA
LOC_Os01g06660.1	108.058	316.927	1.55234
LOC_Os01g06670.1	0	0	NA
LOC_Os01g06680.1	97.8436	76.0498	-0.363533
LOC_Os01g06690.1	0	0	NA
LOC_Os01g06700.1	0	0	NA
LOC_Os01g06710.1	0	0	NA
LOC_Os01g06720.1	0.158796	0.212546	0.420606
LOC_Os01g06730.1	31.0356	32.0727	0.0474225
LOC_Os01g06740.1	2.43207	22.1554	3.1874
LOC_Os01g06750.1	32.3394	14.091	-1.19851
LOC_Os01g06760.1	10.5125	3.43359	-1.61432
LOC_Os01g06770.1	0.505244	0	-10000
LOC_Os01g06780.1	0	0	NA
LOC_Os01g06790.1	18.3888	19.8721	0.111911
LOC_Os01g06800.1	0	0.0896978	10000
LOC_Os01g06810.1	0.578055	0	-10000
LOC_Os01g06820.1	0	0.197302	10000
LOC_Os01g06836.1	7.41727	7.37679	-0.00789647
LOC_Os01g06852.1	0.476387	3.4066	2.83813
LOC_Os01g06870.1	3.6717	0.816234	-2.16939
LOC_Os01g06876.1	30.5767	27.6356	-0.14591
LOC_Os01g06882.1	3.50987	8.65488	1.3021
LOC_Os01g06890.1	18.3488	15.3103	-0.261181
LOC_Os01g06900.1	14.2303	16.5142	0.214741
LOC_Os01g06910.1	1.30984	2.25799	0.785643
LOC_Os01g06920.1	45.2153	50.9971	0.173605
LOC_Os01g06940.1	0	0	NA
LOC_Os01g06950.1	0	0	NA
LOC_Os01g06960.1	2.865	0.122848	-4.54359
LOC_Os01g06970.1	0	0	NA
LOC_Os01g06980.1	0.834295	0	-10000
LOC_Os01g06990.1	2.09739	0.196601	-3.41525
LOC_Os01g07000.1	0.641862	0	-10000
LOC_Os01g07010.1	1.6013	0	-10000
LOC_Os01g07020.1	2.80839	0.197302	-3.83127
LOC_Os01g07030.1	1.88034	0	-10000
LOC_Os01g07040.1	2.00661	0	-10000
LOC_Os01g07050.1	2.16009	0	-10000
LOC_Os01g07060.1	0.790914	0	-10000
LOC_Os01g07070.1	1395.78	1126.94	-0.30867
LOC_Os01g07080.1	818.385	816.682	-0.00300637
LOC_Os01g07090.1	1241.39	1056.52	-0.232645
LOC_Os01g07100.1	294.712	274.346	-0.103313
LOC_Os01g07110.1	309.32	449.236	0.538374
LOC_Os01g07120.1	390.963	631.123	0.69089
LOC_Os01g07130.1	1.2704	2.24229	0.819691
LOC_Os01g07140.1	118.567	195.755	0.723348
LOC_Os01g07150.1	31.2852	26.1513	-0.258597
LOC_Os01g07160.1	0.138903	0.787805	2.50376
LOC_Os01g07170.1	521.57	487.047	-0.098799
LOC_Os01g07180.1	0	0	NA
LOC_Os01g07190.1	0.190699	0.122848	-0.634417
LOC_Os01g07200.1	875.447	658.98	-0.409786
LOC_Os01g07212.1	395.823	440.343	0.15377
LOC_Os01g07240.1	1167.59	1152.29	-0.0190373
LOC_Os01g07250.1	524.718	444.387	-0.239728
LOC_Os01g07260.1	1192.77	1061.06	-0.168814
LOC_Os01g07270.1	8.73882	3.48362	-1.32685
LOC_Os01g07280.1	117.65	101.856	-0.20797
LOC_Os01g07300.1	61.2846	75.5852	0.302578
LOC_Os01g07310.1	3868.87	5092.7	0.396519
LOC_Os01g07320.1	45.21	45.2924	0.00262799
LOC_Os01g07330.1	263.406	244.234	-0.109021
LOC_Os01g07340.1	20.6167	26.4257	0.358125
LOC_Os01g07350.1	139.998	273.848	0.967969
LOC_Os01g07360.1	492.629	443.63	-0.151143
LOC_Os01g07364.1	3.61139	13.2919	1.87992
LOC_Os01g07370.1	2333.51	3808.47	0.706714
LOC_Os01g07376.1	147.325	152.316	0.0480673
LOC_Os01g07382.1	675.831	600.166	-0.171301
LOC_Os01g07390.1	878.782	817.097	-0.104998
LOC_Os01g07400.1	442.732	450.827	0.0261409
LOC_Os01g07410.1	953.13	870.976	-0.130039
LOC_Os01g07420.1	527.975	354.645	-0.574092
LOC_Os01g07430.1	1.46868	1.77654	0.274553
LOC_Os01g07450.1	1.07548	1.06311	-0.0166815
LOC_Os01g07460.1	0	0	NA
LOC_Os01g07470.1	0	0.0896978	10000
LOC_Os01g07480.1	18.2392	63.13	1.79128
LOC_Os01g07490.1	1821.91	2249.75	0.304311
LOC_Os01g07500.1	436.037	1385.1	1.66746
LOC_Os01g07510.1	0.163003	0.212546	0.382881
LOC_Os01g07520.1	1496.84	1761.69	0.235041
LOC_Os01g07530.1	330.979	246.317	-0.426223
LOC_Os01g07540.1	118.913	104.092	-0.192039
LOC_Os01g07550.1	6.51161	4.75205	-0.454464
LOC_Os01g07560.1	333.521	417.39	0.323618
LOC_Os01g07570.1	943.217	1290.56	0.452333
LOC_Os01g07590.1	252.578	182.359	-0.469949
LOC_Os01g07600.1	22.2422	24.4811	0.13837
LOC_Os01g07610.1	54.496	87.4645	0.682549
LOC_Os01g07620.1	59.0774	62.1505	0.0731612
LOC_Os01g07630.1	1705.93	1364.77	-0.3219
LOC_Os01g07640.1	5.13856	14.1756	1.46398
LOC_Os01g07650.1	1.30564	1.03751	-0.331621
LOC_Os01g07660.1	4.45365	3.83229	-0.216782
LOC_Os01g07670.1	0	0	NA
LOC_Os01g07680.1	0	0.295252	10000
LOC_Os01g07700.1	470.363	382.898	-0.296814
LOC_Os01g07710.1	0.520929	0.260064	-1.00222
LOC_Os01g07720.1	1129.74	1037.02	-0.12355
LOC_Os01g07730.1	235.37	67.61	-1.79962
LOC_Os01g07740.1	1716.87	1676.82	-0.034056
LOC_Os01g07750.1	538.927	695.073	0.367073
LOC_Os01g07760.1	5399.25	8993.28	0.736089
LOC_Os01g07770.1	18.258	58.6489	1.68358
LOC_Os01g07780.1	210.749	238.932	0.181074
LOC_Os01g07790.1	1.13447	2.63751	1.21716
LOC_Os01g07800.1	89.3244	74.4156	-0.263451
LOC_Os01g07810.1	2226.82	1749.71	-0.347873
LOC_Os01g07820.1	0.163003	0.0896978	-0.86175
LOC_Os01g07830.1	0	0	NA
LOC_Os01g07840.1	3.22521	1.0689	-1.59326
LOC_Os01g07850.1	18.3234	459.13	4.64715
LOC_Os01g07860.1	0	1.21793	10000
LOC_Os01g07870.1	779.519	784.722	0.00959781
LOC_Os01g07880.1	323.813	422.916	0.385208
LOC_Os01g07890.1	50.8031	198.331	1.96492
LOC_Os01g07900.1	13.1715	12.1503	-0.116432
LOC_Os01g07910.1	1437.25	582.9	-1.30199
LOC_Os01g07920.1	417.629	342.244	-0.287197
LOC_Os01g07930.1	0.138903	0.0896978	-0.630933
LOC_Os01g07940.1	315.935	308.484	-0.0344323
LOC_Os01g07950.1	574.445	709.18	0.303984
LOC_Os01g07960.1	3395.97	2766.45	-0.295789
LOC_Os01g07970.1	1137.4	717.091	-0.665508
LOC_Os01g07980.1	225.127	248.957	0.145155
LOC_Os01g07990.1	4.92689	28.6182	2.53818
LOC_Os01g08000.1	85.9596	109.589	0.350371
LOC_Os01g08010.1	58.5121	44.2114	-0.404314
LOC_Os01g08020.1	46.0173	8.79316	-2.38772
LOC_Os01g08050.1	0	0	NA
LOC_Os01g08060.1	0	0	NA
LOC_Os01g08070.1	0	0	NA
LOC_Os01g08090.1	36.3674	95.2061	1.38841
LOC_Os01g08100.1	10.3357	36.516	1.82089
LOC_Os01g08110.1	28.7263	45.5152	0.663973
LOC_Os01g08120.1	29.9745	34.1413	0.187781
LOC_Os01g08130.1	259.11	103.833	-1.3193
LOC_Os01g08140.1	625.521	216.886	-1.52812
LOC_Os01g08150.1	1751.21	1490.36	-0.232686
LOC_Os01g08160.1	196.381	236.136	0.265963
LOC_Os01g08170.1	1.7076	23.3358	3.77251
LOC_Os01g08180.1	0.381397	0	-10000
LOC_Os01g08190.1	453.809	853.423	0.911178
LOC_Os01g08200.1	2342.99	1968.42	-0.251318
LOC_Os01g08220.1	73.9649	65.6379	-0.172312
LOC_Os01g08240.1	0.520929	0.295252	-0.819139
LOC_Os01g08250.1	48.2725	121.311	1.32943
LOC_Os01g08260.1	3541.68	3916.33	0.145071
LOC_Os01g08270.1	1191.29	780.655	-0.609767
LOC_Os01g08280.1	415.441	381.229	-0.123984
LOC_Os01g08290.1	381.938	301.008	-0.343538
LOC_Os01g08300.1	6.54158	2.25741	-1.53497
LOC_Os01g08310.1	674.671	598.175	-0.173617
LOC_Os01g08320.1	770.35	1371.62	0.832291
LOC_Os01g08330.1	2.8974	2.98252	0.0417761
LOC_Os01g08340.1	73.9353	85.8583	0.215694
LOC_Os01g08350.1	30.8452	18.1921	-0.761735
LOC_Os01g08360.1	6.42885	7.39008	0.201029
LOC_Os01g08370.1	174.993	221.863	0.342373
LOC_Os01g08380.1	205.267	542.313	1.40162
LOC_Os01g08390.1	0	0	NA
LOC_Os01g08400.1	1148.26	996.616	-0.204339
LOC_Os01g08410.1	2969.95	3190.96	0.103551
LOC_Os01g08420.1	953.574	860.743	-0.147762
LOC_Os01g08430.1	968.312	940.979	-0.0413094
LOC_Os01g08440.1	464.251	346.135	-0.42357
LOC_Os01g08450.1	1403.77	1412.81	0.00925784
LOC_Os01g08460.1	80.6042	67.4681	-0.25665
LOC_Os01g08464.1	6.48864	8.40959	0.37412
LOC_Os01g08470.1	762.608	1342.32	0.815713
LOC_Os01g08480.1	0.277806	0	-10000
LOC_Os01g08490.1	0.163003	0.672587	2.04483
LOC_Os01g08500.1	0.381397	0	-10000
LOC_Os01g08510.1	3482.56	1343.73	-1.3739
LOC_Os01g08520.1	477.546	448.729	-0.0897941
LOC_Os01g08530.1	37.5471	17.1804	-1.12794
LOC_Os01g08540.1	370.928	346.037	-0.100213
LOC_Os01g08550.1	344.185	286.302	-0.265646
LOC_Os01g08560.1	5021.2	4787.42	-0.068784
LOC_Os01g08570.1	0	0.0986509	10000
LOC_Os01g08580.1	588.036	475.661	-0.305971
LOC_Os01g08590.1	0.138903	0	-10000
LOC_Os01g08600.1	633.12	509.694	-0.312848
LOC_Os01g08610.1	1.51008	0.188349	-3.00315
LOC_Os01g08620.1	0	0	NA
LOC_Os01g08630.1	3.16429	1.10747	-1.51462
LOC_Os01g08640.1	0.163003	0.0986509	-0.724492
LOC_Os01g08650.1	182.887	171.07	-0.0963646
LOC_Os01g08660.1	1623.92	1211.04	-0.423234
LOC_Os01g08670.1	93.7889	133.517	0.509535
LOC_Os01g08680.1	246.235	166.19	-0.567202
LOC_Os01g08690.1	215.663	285.036	0.402366
LOC_Os01g08700.1	17227.3	10851.5	-0.666807
LOC_Os01g08710.1	46.7319	31.8509	-0.553076
LOC_Os01g08720.1	0	0	NA
LOC_Os01g08730.1	0	0	NA
LOC_Os01g08740.1	0.138903	1.05012	2.91841
LOC_Os01g08750.1	2218.39	2341.9	0.0781641
LOC_Os01g08760.1	318.043	265.268	-0.261773
LOC_Os01g08770.1	881.041	1045.8	0.24733
LOC_Os01g08780.1	184.725	101.338	-0.866203
LOC_Os01g08790.1	25.4172	21.8446	-0.218531
LOC_Os01g08800.1	24.4403	18.3322	-0.414884
LOC_Os01g08810.1	27.5327	17.3115	-0.669419
LOC_Os01g08814.1	237.153	178.326	-0.411301
LOC_Os01g08820.1	260.272	196.744	-0.403701
LOC_Os01g08830.1	757.666	858.929	0.180977
LOC_Os01g08840.1	1.7118	0.58029	-1.56067
LOC_Os01g08850.1	465.088	470.093	0.0154444
LOC_Os01g08860.1	226.45	139.194	-0.702093
LOC_Os01g08870.1	18.1866	29.9263	0.718538
LOC_Os01g08880.1	48.3846	77.5915	0.681352
LOC_Os01g08890.1	1927.36	1257.76	-0.615774
LOC_Os01g08930.1	1394.1	1107.92	-0.331475
LOC_Os01g08940.1	0	0	NA
LOC_Os01g08950.1	86.4564	68.5762	-0.334265
LOC_Os01g08960.1	597.649	651.954	0.125472
LOC_Os01g08970.1	3810.67	3706.14	-0.0401258
LOC_Os01g08980.1	0	0.571337	10000
LOC_Os01g08990.1	1.62272	1.25414	-0.371714
LOC_Os01g09000.1	2729.78	3230.72	0.243072
LOC_Os01g09010.1	4734.76	5383.3	0.185197
LOC_Os01g09020.1	834.75	1410.74	0.757038
LOC_Os01g09030.1	408.102	5977.34	3.8725
LOC_Os01g09050.1	0.158796	0.260064	0.711694
LOC_Os01g09060.1	0.24478	0	-10000
LOC_Os01g09080.1	29.4065	95.3792	1.69754
LOC_Os01g09090.1	0.854738	0.344347	-1.31162
LOC_Os01g09100.1	11.713	79.8053	2.76838
LOC_Os01g09110.1	1.50054	0.669882	-1.16351
LOC_Os01g09120.1	467.009	1046.13	1.16354
LOC_Os01g09130.1	0	1.7889	10000
LOC_Os01g09140.1	0	0	NA
LOC_Os01g09150.1	0	0.783884	10000
LOC_Os01g09160.1	0	0.0896978	10000
LOC_Os01g09170.1	0.158796	0.284261	0.840046
LOC_Os01g09180.1	0	0	NA
LOC_Os01g09190.1	0.158796	1.33928	3.07621
LOC_Os01g09200.1	2435.84	2765.96	0.183362
LOC_Os01g09206.1	0.138903	0.0986509	-0.493675
LOC_Os01g09212.1	0.542478	0.700356	0.368523
LOC_Os01g09220.1	4146.1	9439.48	1.18695
LOC_Os01g09230.1	4.35827	24.0044	2.46147
LOC_Os01g09240.1	2.53132	0.645651	-1.97106
LOC_Os01g09246.1	2519.16	2671.91	0.084932
LOC_Os01g09252.1	539.811	510.92	-0.0793564
LOC_Os01g09260.1	0.317591	1.22868	1.95187
LOC_Os01g09270.1	34.2195	40.9725	0.259837
LOC_Os01g09280.1	230.459	352.179	0.611802
LOC_Os01g09290.1	6.82091	7.3309	0.104025
LOC_Os01g09300.1	1590.87	1343.89	-0.243406
LOC_Os01g09305.1	306.449	304.032	-0.0114211
LOC_Os01g09310.1	207.389	189.897	-0.12712
LOC_Os01g09320.1	5216.83	4373.81	-0.254282
LOC_Os01g09330.1	0	0	NA
LOC_Os01g09340.1	0.480594	0.490593	0.0297078
LOC_Os01g09350.1	1.30984	1.7444	0.413338
LOC_Os01g09360.1	2.42667	3.21144	0.404246
LOC_Os01g09370.1	1292.41	1320.85	0.0314006
LOC_Os01g09384.1	282.946	238.362	-0.247368
LOC_Os01g09400.1	0.24478	0.122848	-0.994607
LOC_Os01g09410.1	156.71	164.576	0.0706592
LOC_Os01g09420.1	221.021	338.389	0.614501
LOC_Os01g09430.1	791.919	376.692	-1.07197
LOC_Os01g09440.1	2.13932	2.98803	0.482042
LOC_Os01g09450.1	773.757	882.978	0.190497
LOC_Os01g09460.1	91.4405	212.139	1.2141
LOC_Os01g09470.1	214.009	105.888	-1.01513
LOC_Os01g09480.1	0	0	NA
LOC_Os01g09490.1	0.190699	0	-10000
LOC_Os01g09500.1	29.4051	36.5511	0.313847
LOC_Os01g09510.1	18298.6	11667.4	-0.649247
LOC_Os01g09520.1	0	0	NA
LOC_Os01g09530.1	0.260464	0.284261	0.126131
LOC_Os01g09540.1	6016.7	299.058	-4.33048
LOC_Os01g09550.1	746.31	374.991	-0.992918
LOC_Os01g09560.1	5961.82	6071.73	0.026355
LOC_Os01g09570.1	583.093	979.915	0.74893
LOC_Os01g09580.1	1537.04	1165.55	-0.399138
LOC_Os01g09590.1	56.5317	34.0845	-0.729947
LOC_Os01g09600.1	0	0.284261	10000
LOC_Os01g09610.1	0.317591	0.69137	1.12229
LOC_Os01g09620.1	2782.09	3407.73	0.29264
LOC_Os01g09640.1	454.225	440.59	-0.0439707
LOC_Os01g09650.1	7.99794	12.2432	0.614285
LOC_Os01g09660.1	41.6957	62.0609	0.573785
LOC_Os01g09665.1	17.351	31.0281	0.838559
LOC_Os01g09670.1	723.899	1041.23	0.524427
LOC_Os01g09680.1	0	0	NA
LOC_Os01g09690.1	0	0	NA
LOC_Os01g09700.1	18.9823	4.69889	-2.01426
LOC_Os01g09710.1	0	0	NA
LOC_Os01g09720.1	0.644147	0.554615	-0.215904
LOC_Os01g09730.1	6.98235	8.69327	0.316187
LOC_Os01g09740.1	79.2109	80.5973	0.0250336
LOC_Os01g09750.1	678.342	423.646	-0.679152
LOC_Os01g09760.1	510.474	442.18	-0.207203
LOC_Os01g09770.1	1855.25	1227.04	-0.596427
LOC_Os01g09790.1	682.524	609.852	-0.162421
LOC_Os01g09800.1	348.615	542.769	0.638701
LOC_Os01g09810.1	0.864277	0.669988	-0.367357
LOC_Os01g09830.1	92.1974	453.035	2.29682
LOC_Os01g09850.1	364.583	566.258	0.635213
LOC_Os01g09860.1	4837.82	5388.81	0.155611
LOC_Os01g09870.1	9.54313	11.8739	0.315264
LOC_Os01g09880.1	2967.84	1598.56	-0.892641
LOC_Os01g09890.1	2414.68	1938.76	-0.316698
LOC_Os01g09900.1	0.317591	0.714053	1.16886
LOC_Os01g09930.1	0.158796	0.257358	0.696607
LOC_Os01g09940.1	0	0	NA
LOC_Os01g09950.1	0.158796	0.546363	1.78269
LOC_Os01g09960.1	0.745265	0	-10000
LOC_Os01g09970.1	0	0	NA
LOC_Os01g09980.1	0.138903	0.445707	1.68202
LOC_Os01g09990.1	4.60027	22.4341	2.2859
LOC_Os01g10000.1	3.26684	5.92507	0.858937
LOC_Os01g10010.1	431.421	473.969	0.135697
LOC_Os01g10020.1	438.048	648.2	0.565352
LOC_Os01g10030.1	6.61194	8.80856	0.413833
LOC_Os01g10040.1	238.32	923.149	1.95366
LOC_Os01g10050.1	897.764	794.47	-0.176343
LOC_Os01g10060.1	1.46864	1.68856	0.201313
LOC_Os01g10070.1	35.6695	27.5872	-0.370695
LOC_Os01g10080.1	562.055	378.15	-0.57175
LOC_Os01g10090.1	9.61572	17.7759	0.886459
LOC_Os01g10100.1	468.324	416.036	-0.170799
LOC_Os01g10110.1	0.988805	4.93576	2.31952
LOC_Os01g10120.1	0	0	NA
LOC_Os01g10130.1	57.6222	51.5181	-0.161545
LOC_Os01g10140.1	236.785	241.96	0.0311936
LOC_Os01g10150.1	1936.42	1953.88	0.0129528
LOC_Os01g10160.1	0	0	NA
LOC_Os01g10170.1	0	0	NA
LOC_Os01g10180.1	129.262	140.153	0.116714
LOC_Os01g10195.1	15.4175	19.7941	0.360505
LOC_Os01g10200.1	0	0	NA
LOC_Os01g10210.1	335.335	871.5	1.3779
LOC_Os01g10230.1	2.3483	0.894149	-1.39303
LOC_Os01g10240.1	0	0.212546	10000
LOC_Os01g10250.1	649.38	428.158	-0.60092
LOC_Os01g10260.1	4.42865	3.38038	-0.389682
LOC_Os01g10270.1	1.98559	4.17193	1.07115
LOC_Os01g10290.1	1155.38	924.133	-0.322192
LOC_Os01g10300.1	46.3023	39.6483	-0.223826
LOC_Os01g10310.1	0.652011	0.526452	-0.308594
LOC_Os01g10320.1	282.256	232.213	-0.281557
LOC_Os01g10340.1	846.06	618.606	-0.451738
LOC_Os01g10350.1	396.205	362.89	-0.126714
LOC_Os01g10370.1	2.79917	20.7895	2.89278
LOC_Os01g10380.1	0	0.257358	10000
LOC_Os01g10390.1	0	0.0986509	10000
LOC_Os01g10400.1	5597.25	4351.65	-0.363157
LOC_Os01g10410.1	0.626177	1.15439	0.882487
LOC_Os01g10420.1	5.37677	11.4401	1.08929
LOC_Os01g10430.1	2396.81	2136.36	-0.165958
LOC_Os01g10440.1	20.5735	26.9957	0.391942
LOC_Os01g10450.1	564.722	391.437	-0.52876
LOC_Os01g10460.1	21.0788	28.0879	0.414151
LOC_Os01g10470.1	0	0	NA
LOC_Os01g10480.1	2.46317	7.77842	1.65896
LOC_Os01g10490.1	5505.48	6170.14	0.164436
LOC_Os01g10504.1	42.9276	13.3342	-1.68677
LOC_Os01g10520.1	51.1764	312.93	2.61229
LOC_Os01g10530.1	507.15	911.278	0.845478
LOC_Os01g10550.1	0	0.260064	10000
LOC_Os01g10560.1	0	0	NA
LOC_Os01g10580.1	221.924	1097.17	2.30565
LOC_Os01g10590.1	0.317591	6.9996	4.46203
LOC_Os01g10600.1	63.1089	133.743	1.08355
LOC_Os01g10610.1	1905.89	2234.86	0.229719
LOC_Os01g10630.1	137.794	129.128	-0.0937045
LOC_Os01g10640.1	7.00227	1.1839	-2.56427
LOC_Os01g10650.1	0	0	NA
LOC_Os01g10660.1	0	0	NA
LOC_Os01g10670.1	0	0.393202	10000
LOC_Os01g10680.1	364.587	374.61	0.0391242
LOC_Os01g10690.1	547.352	373.939	-0.549666
LOC_Os01g10700.1	35.8049	49.6102	0.47048
LOC_Os01g10710.1	17.8421	26.2837	0.558884
LOC_Os01g10720.1	0	0	NA
LOC_Os01g10740.1	0	0.0986509	10000
LOC_Os01g10750.1	0	0	NA
LOC_Os01g10760.1	0.260464	0.161413	-0.69033
LOC_Os01g10770.1	0	0.0986509	10000
LOC_Os01g10780.1	0.163003	0	-10000
LOC_Os01g10790.1	619.128	616.675	-0.00572655
LOC_Os01g10800.1	525.605	214.726	-1.29148
LOC_Os01g10810.1	218.106	73.6389	-1.56649
LOC_Os01g10820.1	3306.66	2767.89	-0.256584
LOC_Os01g10830.1	19.5295	22.711	0.217739
LOC_Os01g10840.1	2628.2	2698.66	0.0381682
LOC_Os01g10850.1	876.565	1241.09	0.501675
LOC_Os01g10860.1	199.11	291.313	0.549004
LOC_Os01g10870.1	0	0.792763	10000
LOC_Os01g10880.1	67.953	64.3503	-0.0785918
LOC_Os01g10890.1	154.65	56.1693	-1.46116
LOC_Os01g10900.1	172.165	137.587	-0.323445
LOC_Os01g10910.1	1.23193	0.875436	-0.492845
LOC_Os01g10920.1	35.3971	51.1567	0.531291
LOC_Os01g10930.1	153.664	152.468	-0.0112701
LOC_Os01g10940.1	0	0.45466	10000
LOC_Os01g10950.1	1102.96	1418.47	0.362948
LOC_Os01g10960.1	148.668	142.218	-0.0639821
LOC_Os01g10970.1	0.484801	1.01283	1.06293
LOC_Os01g10980.1	14.6841	23.3915	0.671733
LOC_Os01g10990.1	45.3088	12.1054	-1.90414
LOC_Os01g11000.1	0.138903	0.0986509	-0.493675
LOC_Os01g11010.1	91.3069	80.3007	-0.185311
LOC_Os01g11020.1	4.57823	1.57745	-1.5372
LOC_Os01g11040.1	4541.24	3149.07	-0.528161
LOC_Os01g11054.1	919.189	339.648	-1.43632
LOC_Os01g11070.1	1449.59	1261.48	-0.200528
LOC_Os01g11080.1	0.163003	0.957547	2.55445
LOC_Os01g11110.1	249.98	270.218	0.112312
LOC_Os01g11120.1	1069.29	670.03	-0.674362
LOC_Os01g11130.1	3.74541	9.53066	1.34745
LOC_Os01g11140.1	0	0	NA
LOC_Os01g11150.1	58.0361	708.791	3.61034
LOC_Os01g11160.1	71.3699	307.216	2.10587
LOC_Os01g11170.1	0	0.269093	10000
LOC_Os01g11190.1	6.58306	7.07699	0.104378
LOC_Os01g11200.1	0	0.393903	10000
LOC_Os01g11210.1	147.458	81.4818	-0.855756
LOC_Os01g11220.1	30.0564	14.7995	-1.02213
LOC_Os01g11230.1	964.145	1473.08	0.611511
LOC_Os01g11240.1	992.931	1952.1	0.975259
LOC_Os01g11250.1	83.0593	76.1361	-0.125562
LOC_Os01g11260.1	251.797	209.38	-0.266137
LOC_Os01g11270.1	6.52	7.19083	0.141287
LOC_Os01g11280.1	7.30379	6.72066	-0.120043
LOC_Os01g11300.1	3.33887	11.679	1.80649
LOC_Os01g11310.1	0	0	NA
LOC_Os01g11320.1	0.190699	0.645651	1.75946
LOC_Os01g11330.1	4.00821	2.49291	-0.685127
LOC_Os01g11340.1	596.633	1173.84	0.976317
LOC_Os01g11350.1	1084.23	967.463	-0.164398
LOC_Os01g11360.1	114.252	83.4529	-0.453191
LOC_Os01g11370.1	992.99	1059.96	0.0941625
LOC_Os01g11390.1	0	1.47081	10000
LOC_Os01g11400.1	6.17044	8.19875	0.41003
LOC_Os01g11414.1	2341.66	4402.44	0.910772
LOC_Os01g11430.1	11.385	12.3894	0.121968
LOC_Os01g11450.1	0	0.368545	10000
LOC_Os01g11460.1	20.927	34.4402	0.718728
LOC_Os01g11470.1	8.79534	9.85905	0.164709
LOC_Os01g11480.1	7.57981	28.5286	1.91217
LOC_Os01g11490.1	0.277806	0	-10000
LOC_Os01g11500.1	0.24478	0.520204	1.08759
LOC_Os01g11510.1	0	0	NA
LOC_Os01g11520.1	18.1361	39.6074	1.12691
LOC_Os01g11550.1	5134.4	2626.01	-0.967327
LOC_Os01g11570.1	823.165	1251.26	0.604122
LOC_Os01g11580.1	922.723	801.209	-0.203718
LOC_Os01g11590.1	676.161	591.494	-0.193002
LOC_Os01g11600.1	13.0454	19.2337	0.560098
LOC_Os01g11620.1	1860.71	1483.49	-0.326858
LOC_Os01g11640.1	0	0	NA
LOC_Os01g11650.1	666.242	2135.08	1.68017
LOC_Os01g11660.1	28.1922	36.5726	0.37547
LOC_Os01g11670.1	40.7454	34.7692	-0.228826
LOC_Os01g11680.1	1.45551	0.605748	-1.26473
LOC_Os01g11690.1	0.787258	0.703065	-0.163179
LOC_Os01g11700.1	136.592	290.702	1.08967
LOC_Os01g11704.1	0	0.295252	10000
LOC_Os01g11710.1	1917.7	1836.39	-0.062503
LOC_Os01g11720.1	28.0497	100.297	1.83823
LOC_Os01g11730.1	411.884	8001.73	4.28
LOC_Os01g11740.1	0	0.122848	10000
LOC_Os01g11750.1	101.98	48.0962	-1.08429
LOC_Os01g11760.1	8.10358	5.88612	-0.461243
LOC_Os01g11770.1	0	0.0986509	10000
LOC_Os01g11780.1	0.668247	0.311197	-1.10255
LOC_Os01g11790.1	0.963395	4.36258	2.17898
LOC_Os01g11800.1	0	0	NA
LOC_Os01g11810.1	971.06	276.789	-1.81077
LOC_Os01g11820.1	17.722	18.2844	0.0450697
LOC_Os01g11830.1	0	0.122848	10000
LOC_Os01g11840.1	0	0.196601	10000
LOC_Os01g11850.1	0.56237	0.122848	-2.19464
LOC_Os01g11860.1	32.4708	88.3864	1.44468
LOC_Os01g11870.1	0.790303	1.04749	0.406453
LOC_Os01g11880.1	243.379	486.645	0.999665
LOC_Os01g11900.1	6211.54	5633.53	-0.140912
LOC_Os01g11910.1	31.505	100.273	1.67029
LOC_Os01g11920.1	451.098	551.283	0.289355
LOC_Os01g11940.1	3.40194	4.73029	0.475569
LOC_Os01g11946.1	1418.85	974.327	-0.542247
LOC_Os01g11952.1	1443.54	924.99	-0.642106
LOC_Os01g11960.1	541.984	463.241	-0.226488
LOC_Os01g11970.1	75.8258	64.6694	-0.229605
LOC_Os01g11980.1	231.16	216.746	-0.0928892
LOC_Os01g11990.1	24.643	36.0372	0.548307
LOC_Os01g12000.1	96.9007	233.951	1.27163
LOC_Os01g12010.1	0	0	NA
LOC_Os01g12020.1	0.301906	0	-10000
LOC_Os01g12030.1	0	0	NA
LOC_Os01g12040.1	0.158796	0.368545	1.21467
LOC_Os01g12060.1	24.6644	18.7678	-0.394167
LOC_Os01g12070.1	15.5187	30.2444	0.962659
LOC_Os01g12080.1	2025.82	1659.65	-0.287633
LOC_Os01g12090.1	393.356	371.643	-0.0819176
LOC_Os01g12100.1	113.244	114.261	0.0129077
LOC_Os01g12110.1	10.3013	58.1198	2.49621
LOC_Os01g12120.1	0	0	NA
LOC_Os01g12130.1	0.767366	0	-10000
LOC_Os01g12140.1	0	0	NA
LOC_Os01g12150.1	1.60754	1.06273	-0.597081
LOC_Os01g12160.1	187.294	113.747	-0.71948
LOC_Os01g12170.1	0	0.0896978	10000
LOC_Os01g12180.1	149.592	147.799	-0.0174027
LOC_Os01g12190.1	182.678	142.912	-0.354175
LOC_Os01g12200.1	330.55	318.491	-0.0536151
LOC_Os01g12210.1	157.282	20.9453	-2.90866
LOC_Os01g12220.1	363.772	134.166	-1.43901
LOC_Os01g12230.1	201.586	118.071	-0.771744
LOC_Os01g12240.1	39.2723	27.9957	-0.488308
LOC_Os01g12250.1	134.652	97.1558	-0.470867
LOC_Os01g12260.1	557.827	348.469	-0.678788
LOC_Os01g12270.1	271.367	249.936	-0.118684
LOC_Os01g12280.1	314.469	277.07	-0.182665
LOC_Os01g12290.1	50.2579	62.0751	0.304666
LOC_Os01g12304.1	206.722	246.676	0.25493
LOC_Os01g12310.1	0	0	NA
LOC_Os01g12320.1	343.203	174.535	-0.975544
LOC_Os01g12330.1	129.699	92.7679	-0.483465
LOC_Os01g12340.1	658.696	418.223	-0.655341
LOC_Os01g12350.1	2.61973	3.56026	0.442565
LOC_Os01g12360.1	1.77951	0.637565	-1.48084
LOC_Os01g12374.1	7.73971	3.22494	-1.26301
LOC_Os01g12381.1	26.0194	55.2887	1.0874
LOC_Os01g12390.1	1413.3	1099.47	-0.362266
LOC_Os01g12400.1	501.4	574.346	0.19596
LOC_Os01g12410.1	68.8303	84.6441	0.298365
LOC_Os01g12420.1	129.489	134.288	0.0525051
LOC_Os01g12430.1	230.269	240.16	0.0606717
LOC_Os01g12440.1	290.19	620.559	1.09657
LOC_Os01g12460.1	245.954	119.689	-1.0391
LOC_Os01g12464.1	181.288	529.813	1.5472
LOC_Os01g12470.1	105.247	47.1821	-1.15747
LOC_Os01g12480.1	883.197	794.781	-0.152177
LOC_Os01g12490.1	8.57935	4.64862	-0.884065
LOC_Os01g12500.1	1.33594	0.753318	-0.826526
LOC_Os01g12510.1	0	0	NA
LOC_Os01g12520.1	74.1426	10.0599	-2.88169
LOC_Os01g12530.1	1710.09	1266.29	-0.433469
LOC_Os01g12540.1	618.257	589.484	-0.0687545
LOC_Os01g12550.1	699.78	526.384	-0.410786
LOC_Os01g12560.1	460.84	201.402	-1.19419
LOC_Os01g12570.1	72.484	0.311197	-7.86369
LOC_Os01g12580.1	20.9849	25.3833	0.27453
LOC_Os01g12590.1	2.441	1.02943	-1.24562
LOC_Os01g12600.1	4.50593	2.47009	-0.867263
LOC_Os01g12610.1	0.542478	1.10754	1.02972
LOC_Os01g12630.1	0	0	NA
LOC_Os01g12640.1	658.52	530.378	-0.312206
LOC_Os01g12650.1	5877.35	4357.92	-0.431526
LOC_Os01g12660.1	94.478	492.647	2.3825
LOC_Os01g12670.1	589.588	669.777	0.183973
LOC_Os01g12680.1	11.0817	8.00125	-0.469876
LOC_Os01g12690.1	378.149	581.171	0.620008
LOC_Os01g12700.1	0	0	NA
LOC_Os01g12710.1	1619.18	546.834	-1.56609
LOC_Os01g12720.1	708.378	633.63	-0.160879
LOC_Os01g12730.1	1874.5	1612.78	-0.21695
LOC_Os01g12740.1	40.987	1.97032	-4.37866
LOC_Os01g12750.1	44.6049	10.488	-2.08846
LOC_Os01g12760.1	7.49499	20.238	1.43307
LOC_Os01g12770.1	48.8613	73.2904	0.584933
LOC_Os01g12780.1	0	0	NA
LOC_Os01g12790.1	17.1544	68.0477	1.98797
LOC_Os01g12800.1	613.37	472.397	-0.376756
LOC_Os01g12810.1	1469.13	1370.28	-0.100494
LOC_Os01g12820.1	5.23609	14.3519	1.45468
LOC_Os01g12830.1	1366.28	1160.99	-0.234898
LOC_Os01g12840.1	817.756	1368.75	0.743114
LOC_Os01g12850.1	0	0	NA
LOC_Os01g12860.1	1196.53	1086.94	-0.138585
LOC_Os01g12870.1	1804.1	1375.87	-0.390935
LOC_Os01g12880.1	3451.2	4220.11	0.290185
LOC_Os01g12890.1	176.589	180.809	0.0340701
LOC_Os01g12900.1	831.044	430.47	-0.949011
LOC_Os01g12910.1	119.539	156.65	0.390069
LOC_Os01g12920.1	67.3511	37.5317	-0.843594
LOC_Os01g12930.1	14.4379	19.2811	0.417326
LOC_Os01g12940.1	6.84559	0	-10000
LOC_Os01g12950.1	259.217	326.023	0.330817
LOC_Os01g12990.1	3.79935	1.48354	-1.35671
LOC_Os01g13000.1	140.69	104.942	-0.422932
LOC_Os01g13010.1	0	0	NA
LOC_Os01g13020.1	0	0.122848	10000
LOC_Os01g13024.1	5.71521	7.75588	0.440484
LOC_Os01g13030.1	3770.54	3615.51	-0.0605734
LOC_Os01g13040.1	0.163003	8.25063	5.66154
LOC_Os01g13050.1	4.68534	10.9405	1.22345
LOC_Os01g13060.1	550.987	545.138	-0.0153967
LOC_Os01g13070.1	11.3854	10.6188	-0.100569
LOC_Os01g13080.1	2911.66	2196.34	-0.406744
LOC_Os01g13090.1	387.209	613.921	0.664941
LOC_Os01g13100.1	930.25	1327.03	0.512512
LOC_Os01g13120.1	119.937	169.053	0.495195
LOC_Os01g13130.1	48.2038	74.9455	0.636697
LOC_Os01g13140.1	61.8217	40.0308	-0.627004
LOC_Os01g13150.1	1532.57	1319.02	-0.216485
LOC_Os01g13160.1	2037.47	2347.04	0.20406
LOC_Os01g13170.1	604.831	968.843	0.679731
LOC_Os01g13180.1	0.870405	4.78605	2.45908
LOC_Os01g13190.1	2022.73	1554.64	-0.379718
LOC_Os01g13200.1	3967.32	3976.62	0.00337927
LOC_Os01g13210.1	3449.47	6187.78	0.843046
LOC_Os01g13229.1	115.01	94.8811	-0.277567
LOC_Os01g13250.1	0.777168	0.453959	-0.775664
LOC_Os01g13260.1	394.193	576.553	0.54855
LOC_Os01g13270.1	6.84638	6.37999	-0.101786
LOC_Os01g13280.1	110.075	101.747	-0.113501
LOC_Os01g13285.1	1.03204	1.3053	0.33889
LOC_Os01g13300.1	49.5765	27.802	-0.834467
LOC_Os01g13310.1	0.614166	0.582251	-0.0769854
LOC_Os01g13320.1	111.376	50.8894	-1.13
LOC_Os01g13330.1	0	0.251111	10000
LOC_Os01g13350.1	610.223	639.041	0.0665717
LOC_Os01g13340.1	1.84836	0.736215	-1.32805
LOC_Os01g13360.1	0	0.54714	10000
LOC_Os01g13370.1	1455.77	1597.28	0.133837
LOC_Os01g13380.1	0	0	NA
LOC_Os01g13390.1	1197.26	749.634	-0.675477
LOC_Os01g13404.1	498.111	307.91	-0.693961
LOC_Os01g13420.1	366.585	506.792	0.467248
LOC_Os01g13430.1	2004.78	2067.55	0.0444761
LOC_Os01g13440.1	0	0	NA
LOC_Os01g13450.1	0.683303	0.6493	-0.0736406
LOC_Os01g13460.1	1888.67	2629.27	0.477293
LOC_Os01g13470.1	1206.71	1214.18	0.00890634
LOC_Os01g13480.1	295.757	281.422	-0.0716786
LOC_Os01g13490.1	295.338	263.188	-0.166273
LOC_Os01g13500.1	1.07846	0.675458	-0.675038
LOC_Os01g13510.1	0	0	NA
LOC_Os01g13520.1	664.209	707.068	0.090212
LOC_Os01g13530.1	917.209	810.897	-0.177731
LOC_Os01g13540.1	1528.68	1569.88	0.0383661
LOC_Os01g13550.1	619.983	515.022	-0.267593
LOC_Os01g13560.1	2.99937	5.34584	0.833757
LOC_Os01g13570.1	405.659	154.716	-1.39064
LOC_Os01g13590.1	0	0	NA
LOC_Os01g13600.1	0.260464	0.161413	-0.69033
LOC_Os01g13610.1	1.01466	0.64509	-0.653419
LOC_Os01g13620.1	7.61324	5.21219	-0.546621
LOC_Os01g13630.1	0.575505	1.15586	1.00607
LOC_Os01g13640.1	1.35267	2.29363	0.761821
LOC_Os01g13650.1	2.72695	1.12745	-1.27422
LOC_Os01g13660.1	1373.95	1257.4	-0.127886
LOC_Os01g13670.1	4.04885	0.850184	-2.25166
LOC_Os01g13680.1	0.24478	0.531995	1.11993
LOC_Os01g13690.1	2048.07	116.271	-4.1387
LOC_Os01g13700.1	1184.44	811.266	-0.545961
LOC_Os01g13710.1	1.55179	3.84102	1.30756
LOC_Os01g13720.1	434.601	282.151	-0.623223
LOC_Os01g13730.1	1475.78	1703.66	0.207157
LOC_Os01g13740.1	1937.5	1323.94	-0.549358
LOC_Os01g13760.1	711.64	784.48	0.140588
LOC_Os01g13770.1	19595.3	15149	-0.371287
LOC_Os01g13780.1	10.7137	5.13509	-1.061
LOC_Os01g13800.1	2032.47	2561.69	0.333859
LOC_Os01g13810.1	0.158796	0.393202	1.3081
LOC_Os01g13820.1	0.919668	0.965101	0.0695664
LOC_Os01g13830.1	1.34506	0.286299	-2.23207
LOC_Os01g13840.1	3.52876	5.45097	0.627353
LOC_Os01g13850.1	0.353701	0.311197	-0.184704
LOC_Os01g13860.1	0.87463	0.161413	-2.43792
LOC_Os01g13870.1	0	0.196601	10000
LOC_Os01g13880.1	0	0	NA
LOC_Os01g13890.1	0	0	NA
LOC_Os01g13900.1	0.260464	0.161413	-0.69033
LOC_Os01g13910.1	0	0.358715	10000
LOC_Os01g13920.1	0.158796	0	-10000
LOC_Os01g13930.1	124.76	178.688	0.518287
LOC_Os01g13940.1	476.979	369.523	-0.368258
LOC_Os01g13950.1	5.8303	8.59874	0.560555
LOC_Os01g13960.1	0	0	NA
LOC_Os01g13970.1	0	0	NA
LOC_Os01g13980.1	0	0	NA
LOC_Os01g13990.1	0	0	NA
LOC_Os01g14000.1	2.03781	2.27277	0.157431
LOC_Os01g14010.1	8.20289	22.8469	1.47779
LOC_Os01g14020.1	491.12	297.839	-0.721546
LOC_Os01g14030.1	2.30065	3.51661	0.612146
LOC_Os01g14040.1	443.304	346.798	-0.354202
LOC_Os01g14050.1	1186.66	1286.97	0.117075
LOC_Os01g14060.1	1.51035	2.83238	0.907134
LOC_Os01g14070.1	654.901	641.47	-0.0298948
LOC_Os01g14080.1	61.2818	49.1412	-0.318527
LOC_Os01g14090.1	830.985	562.262	-0.563581
LOC_Os01g14100.1	647.427	347.905	-0.896023
LOC_Os01g14110.1	121.927	130.426	0.0972031
LOC_Os01g14120.1	0.83256	1.63033	0.969541
LOC_Os01g14130.1	15.1429	21.1026	0.478776
LOC_Os01g14140.1	420.843	921.593	1.13085
LOC_Os01g14160.1	8.57496	3.85852	-1.15208
LOC_Os01g14170.1	0	0	NA
LOC_Os01g14180.1	0	0	NA
LOC_Os01g14190.1	0.946054	0.772074	-0.293182
LOC_Os01g14200.1	0	0.122848	10000
LOC_Os01g14210.1	0	0	NA
LOC_Os01g14220.1	0.163003	0	-10000
LOC_Os01g14230.1	0	0	NA
LOC_Os01g14240.1	0	0	NA
LOC_Os01g14250.1	14.3392	9.71977	-0.560966
LOC_Os01g14260.1	0	0.380206	10000
LOC_Os01g14270.1	0	0.356009	10000
LOC_Os01g14280.1	0	0	NA
LOC_Os01g14290.1	0	0	NA
LOC_Os01g14300.1	0.435479	0	-10000
LOC_Os01g14310.1	0	0	NA
LOC_Os01g14320.1	0	0	NA
LOC_Os01g14330.1	0.138903	0	-10000
LOC_Os01g14340.1	0	0.257358	10000
LOC_Os01g14360.1	0	0.161413	10000
LOC_Os01g14370.1	1485.31	1710.53	0.203686
LOC_Os01g14380.1	0	0	NA
LOC_Os01g14390.1	0	0.347056	10000
LOC_Os01g14400.1	0	0	NA
LOC_Os01g14410.1	37.3054	539.373	3.85383
LOC_Os01g14420.1	423.246	414.088	-0.0315597
LOC_Os01g14430.1	0.163003	0.597496	1.87403
LOC_Os01g14440.1	507.5	2280.97	2.16817
LOC_Os01g14450.1	0	0	NA
LOC_Os01g14460.1	0	0.51605	10000
LOC_Os01g14470.1	0	0	NA
LOC_Os01g14490.1	2.72463	3.51813	0.368748
LOC_Os01g14510.1	83.1565	36.0101	-1.20743
LOC_Os01g14514.1	69.5175	60.0168	-0.212009
LOC_Os01g14520.1	9.56261	3.99263	-1.26007
LOC_Os01g14530.1	126.721	157.797	0.316412
LOC_Os01g14540.1	0.423467	1.46619	1.79175
LOC_Os01g14550.1	23.9496	9.77505	-1.29282
LOC_Os01g14570.1	0	0	NA
LOC_Os01g14580.1	1073	999.706	-0.102077
LOC_Os01g14590.1	64.6143	15.7429	-2.03715
LOC_Os01g14610.1	917.028	985.535	0.103941
LOC_Os01g14620.1	0	0	NA
LOC_Os01g14630.1	62.5915	101.066	0.691255
LOC_Os01g14640.1	26.2526	18.009	-0.543737
LOC_Os01g14650.1	5.37484	15.4355	1.52196
LOC_Os01g14660.1	4.53428	1.12989	-2.00469
LOC_Os01g14670.1	2444.51	1167.98	-1.06553
LOC_Os01g14690.1	2472.98	1898.21	-0.381607
LOC_Os01g14700.1	0.647803	0.179396	-1.85241
LOC_Os01g14720.1	19.4509	18.107	-0.103288
LOC_Os01g14730.1	0	0	NA
LOC_Os01g14750.1	0	0	NA
LOC_Os01g14760.1	1.03204	0.436754	-1.2406
LOC_Os01g14770.1	593.981	340.243	-0.803852
LOC_Os01g14780.1	1.98447	1.13087	-0.811324
LOC_Os01g14790.1	1105.03	857.152	-0.366465
LOC_Os01g14800.1	0	0	NA
LOC_Os01g14810.1	2137.91	1519.41	-0.492688
LOC_Os01g14820.1	1719.85	1690.04	-0.025223
LOC_Os01g14830.1	787.909	776.549	-0.020952
LOC_Os01g14840.1	659.566	687.989	0.0608683
LOC_Os01g14850.1	28950.8	22828.7	-0.342751
LOC_Os01g14860.1	4400.58	5756.38	0.387468
LOC_Os01g14870.1	303.903	294.126	-0.0471784
LOC_Os01g14880.1	19.1425	30.3011	0.662592
LOC_Os01g14890.1	87.1867	30.5642	-1.51227
LOC_Os01g14900.1	17.9737	109.497	2.60692
LOC_Os01g14910.1	0.321798	0.0896978	-1.84301
LOC_Os01g14920.1	212.365	261.666	0.30118
LOC_Os01g14926.1	0.460701	5.10943	3.47126
LOC_Os01g14932.1	1717.02	1695.27	-0.0183938
LOC_Os01g14940.1	0	0	NA
LOC_Os01g14950.1	8063.62	10723.8	0.411315
LOC_Os01g14960.1	64.7582	51.7244	-0.324219
LOC_Os01g14970.1	15.3654	27.8854	0.859827
LOC_Os01g14980.1	774.382	556.205	-0.477428
LOC_Os01g14990.1	4.33252	0.196601	-4.46186
LOC_Os01g15000.1	236.643	51.5066	-2.19988
LOC_Os01g15010.1	1829.52	2207.25	0.270782
LOC_Os01g15020.1	5045.33	5366.45	0.0890203
LOC_Os01g15029.1	1892.41	1775.59	-0.0919261
LOC_Os01g15039.1	116.786	102.732	-0.184984
LOC_Os01g15060.1	0	0.0986509	10000
LOC_Os01g15070.1	0	0	NA
LOC_Os01g15080.1	0	0	NA
LOC_Os01g15090.1	0	0	NA
LOC_Os01g15100.1	14.9427	0.391942	-5.25266
LOC_Os01g15110.1	1809.63	2040.23	0.17304
LOC_Os01g15120.1	924.555	221.439	-2.06185
LOC_Os01g15130.1	11.2897	3.62477	-1.63904
LOC_Os01g15150.1	0	0	NA
LOC_Os01g15170.1	19.1596	72.3076	1.91608
LOC_Os01g15180.1	0.774085	1.27804	0.723367
LOC_Os01g15190.1	0	0.393903	10000
LOC_Os01g15200.1	0.772961	0.667206	-0.212264
LOC_Os01g15210.1	3.03803	3.10606	0.0319475
LOC_Os01g15220.1	6.94175	8.83167	0.347387
LOC_Os01g15229.1	0.326005	0.447712	0.457675
LOC_Os01g15240.1	15.5748	93.0023	2.57806
LOC_Os01g15250.1	0.440809	0.278047	-0.664827
LOC_Os01g15260.1	1646.26	1843.25	0.163056
LOC_Os01g15270.1	12985.6	41337.3	1.67053
LOC_Os01g15280.1	0.138903	0.0896978	-0.630933
LOC_Os01g15290.1	1225.22	921.082	-0.411644
LOC_Os01g15300.1	258.33	326.962	0.339906
LOC_Os01g15310.1	1503.7	1371.65	-0.132604
LOC_Os01g15320.1	471.662	353.686	-0.415286
LOC_Os01g15330.1	0	0	NA
LOC_Os01g15340.1	19.1107	97.7929	2.35535
LOC_Os01g15350.1	1052.41	1335.19	0.34334
LOC_Os01g15370.1	0	0	NA
LOC_Os01g15380.1	11.7446	10.4165	-0.173121
LOC_Os01g15390.1	162.183	206.286	0.347022
LOC_Os01g15399.1	181.509	213.72	0.235683
LOC_Os01g15410.1	0	0	NA
LOC_Os01g15420.1	0	0	NA
LOC_Os01g15438.1	1.52044	0.375997	-2.01569
LOC_Os01g15448.1	908.657	555.646	-0.709568
LOC_Os01g15460.1	2123.37	2414.81	0.185554
LOC_Os01g15470.1	483.582	589.5	0.285732
LOC_Os01g15480.1	1294.34	1209.46	-0.0978577
LOC_Os01g15490.1	2208.72	1340.21	-0.72075
LOC_Os01g15510.1	5.64378	7.21778	0.354893
LOC_Os01g15520.1	270.639	270.373	-0.00142108
LOC_Os01g15530.1	36.3356	65.7019	0.85455
LOC_Os01g15540.1	269.774	306.469	0.183992
LOC_Os01g15550.1	6.68085	3.93808	-0.76254
LOC_Os01g15560.1	1.17349	0.0986509	-3.57233
LOC_Os01g15570.1	0	0.122848	10000
LOC_Os01g15580.1	303.382	349.282	0.203258
LOC_Os01g15590.1	0	0	NA
LOC_Os01g15600.1	3484.52	2980.12	-0.225589
LOC_Os01g15610.1	207.52	348.87	0.749443
LOC_Os01g15620.1	0.767366	5.65037	2.88036
LOC_Os01g15630.1	1816.86	2169.3	0.255787
LOC_Os01g15640.1	1163	2114.98	0.862787
LOC_Os01g15650.1	0	0	NA
LOC_Os01g15660.1	591.563	536.757	-0.140265
LOC_Os01g15680.1	0.260464	0	-10000
LOC_Os01g15690.1	0	0.245697	10000
LOC_Os01g15700.1	0	0	NA
LOC_Os01g15709.1	0.163003	0	-10000
LOC_Os01g15720.1	0.403575	0.712892	0.820846
LOC_Os01g15740.1	5.05882	1.29153	-1.96972
LOC_Os01g15750.1	0	0	NA
LOC_Os01g15760.1	0.260464	0.122848	-1.08421
LOC_Os01g15770.1	1107.49	439.534	-1.33325
LOC_Os01g15780.1	924.365	1015.8	0.136084
LOC_Os01g15790.1	1298.42	1199.97	-0.113763
LOC_Os01g15800.1	0	0.196601	10000
LOC_Os01g15810.1	8.65423	16.0045	0.886996
LOC_Os01g15830.1	1810.58	2219.2	0.293587
LOC_Os01g15840.1	62.6617	90.1732	0.525114
LOC_Os01g15850.1	768.392	570.676	-0.429171
LOC_Os01g15860.1	301.659	284.078	-0.0866312
LOC_Os01g15880.1	3.38987	1.9822	-0.774127
LOC_Os01g15890.1	11.8908	10.6739	-0.155759
LOC_Os01g15900.1	412.246	592.606	0.523567
LOC_Os01g15910.1	18.8497	16.3025	-0.209448
LOC_Os01g15920.1	2.54147	3.5559	0.484555
LOC_Os01g15934.1	0.464908	1.96563	2.07997
LOC_Os01g15950.1	1.0611	1.51216	0.511047
LOC_Os01g15960.1	0	0	NA
LOC_Os01g15970.1	354.347	617.032	0.800184
LOC_Os01g15979.1	500.388	1745.74	1.80272
LOC_Os01g15990.1	13.225	86.5834	2.71083
LOC_Os01g16000.1	936.42	762.112	-0.297152
LOC_Os01g16010.1	1205.33	955.59	-0.334964
LOC_Os01g16020.1	214.877	122.678	-0.808632
LOC_Os01g16030.1	2759.03	1035.04	-1.41447
LOC_Os01g16040.1	2873.97	1713.62	-0.745999
LOC_Os01g16050.1	7.6614	9.38394	0.292585
LOC_Os01g16060.1	130.042	164.398	0.33821
LOC_Os01g16070.1	13.904	25.9729	0.901504
LOC_Os01g16080.1	313.492	270.819	-0.211101
LOC_Os01g16090.1	2119	1652.68	-0.358579
LOC_Os01g16100.1	421.956	263.03	-0.681863
LOC_Os01g16110.1	2129.25	2608.05	0.292622
LOC_Os01g16120.1	314.359	92.7849	-1.76045
LOC_Os01g16124.1	858.792	349.158	-1.29843
LOC_Os01g16130.1	721.225	455.185	-0.663998
LOC_Os01g16140.1	45.7066	228.142	2.31946
LOC_Os01g16146.1	313.566	247.346	-0.342241
LOC_Os01g16152.1	2209.38	895.298	-1.3032
LOC_Os01g16160.1	0	0.0896978	10000
LOC_Os01g16170.1	580.544	286.329	-1.01973
LOC_Os01g16180.1	1970.72	1770.31	-0.154717
LOC_Os01g16190.1	2645.87	2566.52	-0.0439273
LOC_Os01g16200.1	12.4422	5.38529	-1.20815
LOC_Os01g16210.1	591.402	608.286	0.0406091
LOC_Os01g16220.1	339.061	275.023	-0.301993
LOC_Os01g16230.1	6.82461	8.7752	0.362685
LOC_Os01g16240.1	6694.64	4957.34	-0.43344
LOC_Os01g16250.1	100.548	35.0533	-1.52026
LOC_Os01g16260.1	726.533	387.396	-0.907221
LOC_Os01g16270.1	1.38269	0	-10000
LOC_Os01g16280.1	0.648355	0.221499	-1.54948
LOC_Os01g16290.1	2471.53	1846.37	-0.420716
LOC_Os01g16300.1	0	0	NA
LOC_Os01g16310.1	26.2338	100.183	1.93314
LOC_Os01g16320.1	0	0	NA
LOC_Os01g16330.1	701.103	698.459	-0.00545091
LOC_Os01g16340.1	418.012	248.688	-0.749205
LOC_Os01g16350.1	427.967	550.132	0.36228
LOC_Os01g16354.1	825.435	893.404	0.114158
LOC_Os01g16360.1	0	0	NA
LOC_Os01g16370.1	14.5771	31.8543	1.12778
LOC_Os01g16380.1	0.383683	3.71091	3.27379
LOC_Os01g16390.1	1.02195	0	-10000
LOC_Os01g16400.1	38.2108	18.2175	-1.06866
LOC_Os01g16414.1	793.112	689.36	-0.202267
LOC_Os01g16430.1	1969.38	1692.86	-0.218283
LOC_Os01g16440.1	3.26715	2.14734	-0.605483
LOC_Os01g16450.1	622.205	2515.65	2.01547
LOC_Os01g16460.1	7.2979	18.1828	1.31702
LOC_Os01g16470.1	0	0	NA
LOC_Os01g16480.1	0.659832	0.409848	-0.687009
LOC_Os01g16490.1	0	0	NA
LOC_Os01g16500.1	0	0	NA
LOC_Os01g16510.1	448.341	497.309	0.149547
LOC_Os01g16520.1	553.543	576.631	0.0589528
LOC_Os01g16530.1	2006.22	1398.11	-0.521
LOC_Os01g16540.1	1771.4	1568.74	-0.175282
LOC_Os01g16550.1	257.783	243.85	-0.0801607
LOC_Os01g16560.1	0	0	NA
LOC_Os01g16570.1	0	0	NA
LOC_Os01g16580.1	0.138903	0	-10000
LOC_Os01g16590.1	0	0	NA
LOC_Os01g16600.1	104.878	154.391	0.557877
LOC_Os01g16610.1	1.22386	1.65117	0.432053
LOC_Os01g16620.1	379.505	241.321	-0.653165
LOC_Os01g16630.1	0	0	NA
LOC_Os01g16640.1	387.356	285.76	-0.438854
LOC_Os01g16650.1	1204.83	1095.03	-0.137866
LOC_Os01g16660.1	51.9448	58.6192	0.174392
LOC_Os01g16670.1	954.432	846.648	-0.17288
LOC_Os01g16690.1	0	0	NA
LOC_Os01g16700.1	0	0	NA
LOC_Os01g16714.1	309.819	96.8209	-1.67803
LOC_Os01g16730.1	0.158796	0.0896978	-0.824025
LOC_Os01g16740.1	0.520929	0.807064	0.631598
LOC_Os01g16750.1	5.24228	2.62915	-0.995598
LOC_Os01g16770.1	1.23848	8.93161	2.85035
LOC_Os01g16780.1	0.158796	0.0986509	-0.686767
LOC_Os01g16790.1	0	0	NA
LOC_Os01g16800.1	0.138903	0.257358	0.889699
LOC_Os01g16810.1	22.8259	192.965	3.07959
LOC_Os01g16820.1	0	0.251111	10000
LOC_Os01g16840.1	0	0.302244	10000
LOC_Os01g16850.1	1.39722	1.67452	0.261191
LOC_Os01g16860.1	0.647803	1.60895	1.31249
LOC_Os01g16870.1	5561.89	4202.75	-0.404241
LOC_Os01g16890.1	9713.86	8017.31	-0.276927
LOC_Os01g16900.1	3209.48	2957.65	-0.117889
LOC_Os01g16910.1	1574.44	1401.14	-0.168237
LOC_Os01g16920.1	1.17591	3.49875	1.57307
LOC_Os01g16930.1	259.985	257.671	-0.0128964
LOC_Os01g16940.1	778.279	822.585	0.0798771
LOC_Os01g16950.1	369.588	424.683	0.20047
LOC_Os01g16960.1	997.299	4084.47	2.03405
LOC_Os01g16970.1	4514.06	3778.96	-0.256438
LOC_Os01g16980.1	43.5244	76.7817	0.818936
LOC_Os01g16990.1	11.3027	6.21491	-0.862858
LOC_Os01g17000.1	602.167	439.553	-0.454126
LOC_Os01g17010.1	465.933	464.393	-0.00477423
LOC_Os01g17020.1	846.16	942.728	0.155911
LOC_Os01g17030.1	0.138903	0.581551	2.06583
LOC_Os01g17040.1	16.2182	24.1171	0.572447
LOC_Os01g17050.1	417.639	1671.09	2.00046
LOC_Os01g17060.1	352.973	325.312	-0.117734
LOC_Os01g17065.1	170.916	164.54	-0.0548468
LOC_Os01g17070.1	134.163	159.974	0.253845
LOC_Os01g17080.1	0.158796	0	-10000
LOC_Os01g17090.1	0.138903	0	-10000
LOC_Os01g17100.1	0	0	NA
LOC_Os01g17110.1	0	0.212546	10000
LOC_Os01g17120.1	0	0	NA
LOC_Os01g17130.1	0	0	NA
LOC_Os01g17150.1	6383.09	3969.21	-0.685401
LOC_Os01g17160.1	144.888	105.161	-0.462345
LOC_Os01g17170.1	10525.6	13977.1	0.409163
LOC_Os01g17180.1	825.56	831.111	0.00966804
LOC_Os01g17190.1	4673.96	4591.94	-0.0255415
LOC_Os01g17214.1	459.858	139.481	-1.72112
LOC_Os01g17240.1	1215.5	837.06	-0.53815
LOC_Os01g17250.1	1465.58	1229.38	-0.253544
LOC_Os01g17260.1	967.495	914.596	-0.0811197
LOC_Os01g17279.1	939.12	1002.6	0.0943677
LOC_Os01g17300.1	28.3544	24.7308	-0.197262
LOC_Os01g17310.1	1.22386	0.680839	-0.846052
LOC_Os01g17320.1	622.192	632.326	0.0233097
LOC_Os01g17330.1	6.25184	7.99481	0.354782
LOC_Os01g17360.1	0.522586	0	-10000
LOC_Os01g17370.1	0	0	NA
LOC_Os01g17380.1	0	0.122848	10000
LOC_Os01g17390.1	1518.29	1621.9	0.0952394
LOC_Os01g17396.1	69.2745	78.3464	0.177543
LOC_Os01g17402.1	44.4535	40.617	-0.130213
LOC_Os01g17410.1	0	0	NA
LOC_Os01g17420.1	0	0.637565	10000
LOC_Os01g17430.1	5612.83	5430.08	-0.0477552
LOC_Os01g17440.1	1.58854	1.70908	0.105517
LOC_Os01g17450.1	0	0	NA
LOC_Os01g17460.1	0	0	NA
LOC_Os01g17470.1	565.93	568.831	0.00737812
LOC_Os01g17970.1	0.870957	0.0986509	-3.1422
LOC_Os01g17980.1	22.4116	12.0268	-0.897989
LOC_Os01g17990.1	0	0	NA
LOC_Os01g18000.1	0	0	NA
LOC_Os01g18010.1	0	0	NA
LOC_Os01g18020.1	0.5203	0.728596	0.485775
LOC_Os01g18030.1	0	0.197302	10000
LOC_Os01g18040.1	0	0.311197	10000
LOC_Os01g18050.1	11691.1	11237.4	-0.0571043
LOC_Os01g18060.1	312.511	303.49	-0.0422556
LOC_Os01g18070.1	4378.65	3625.15	-0.272445
LOC_Os01g18080.1	1047.12	1406.79	0.425977
LOC_Os01g18090.1	4.72297	9.47354	1.00421
LOC_Os01g18100.1	144.94	139.833	-0.0517518
LOC_Os01g18110.1	4.3357	2.6547	-0.707716
LOC_Os01g18120.1	2.02349	0.335394	-2.59291
LOC_Os01g18130.1	9.99339	7.28536	-0.455975
LOC_Os01g18140.1	0.522586	1.55603	1.57413
LOC_Os01g18150.1	0.321798	0	-10000
LOC_Os01g18160.1	5.82832	13.0498	1.16288
LOC_Os01g18170.1	524.154	853.566	0.703513
LOC_Os01g18180.1	0.260464	0.260064	-0.00222062
LOC_Os01g18190.1	0	0	NA
LOC_Os01g18200.1	0	0	NA
LOC_Os01g18210.1	2270.39	1049.87	-1.11273
LOC_Os01g18220.1	34.4048	15.2196	-1.17668
LOC_Os01g18230.1	12.3896	10.0487	-0.302117
LOC_Os01g18240.1	1862.46	847.877	-1.13528
LOC_Os01g18250.1	49.9369	54.498	0.126099
LOC_Os01g18260.1	0	0.122848	10000
LOC_Os01g18270.1	0.787258	0.850111	0.110814
LOC_Os01g18280.1	483.479	329.703	-0.552284
LOC_Os01g18300.1	0	0	NA
LOC_Os01g18310.1	34.0115	26.4264	-0.364039
LOC_Os01g18320.1	2708.72	1808.89	-0.582504
LOC_Os01g18330.1	0	0	NA
LOC_Os01g18340.1	0	0	NA
LOC_Os01g18350.1	0	0	NA
LOC_Os01g18360.1	105.742	80.3805	-0.395633
LOC_Os01g18370.1	0.383683	1.36873	1.83486
LOC_Os01g18375.1	0.24478	0.727336	1.57114
LOC_Os01g18390.1	0.979119	0.284261	-1.78427
LOC_Os01g18400.1	8.12086	7.55284	-0.104614
LOC_Os01g18410.1	56.1896	94.0249	0.742739
LOC_Os01g18420.1	0.163003	0	-10000
LOC_Os01g18440.1	0.24478	0.368545	0.590355
LOC_Os01g18450.1	19.3732	48.5371	1.32503
LOC_Os01g18460.1	0	0	NA
LOC_Os01g18470.1	0	0.257358	10000
LOC_Os01g18480.1	0.138903	0.257358	0.889699
LOC_Os01g18490.1	0	0.0896978	10000
LOC_Os01g18500.1	0	0	NA
LOC_Os01g18510.1	0.158796	0	-10000
LOC_Os01g18520.1	0.383683	0	-10000
LOC_Os01g18530.1	0.326005	3.03025	3.21647
LOC_Os01g18550.1	0	0	NA
LOC_Os01g18560.1	0	0	NA
LOC_Os01g18570.1	0	0	NA
LOC_Os01g18584.1	88.7414	112.984	0.348443
LOC_Os01g18610.1	0.158796	0	-10000
LOC_Os01g18620.1	9.23479	5.88974	-0.648874
LOC_Os01g18630.1	2572.57	2042.87	-0.332614
LOC_Os01g18640.1	1789.43	1618.65	-0.144702
LOC_Os01g18650.1	0	0	NA
LOC_Os01g18660.1	162.671	249.254	0.615656
LOC_Os01g18670.1	2109.78	2969.48	0.493117
LOC_Os01g18680.1	0.697066	0.196601	-1.82602
LOC_Os01g18690.1	0	0	NA
LOC_Os01g18700.1	0	0	NA
LOC_Os01g18710.1	0	0.0896978	10000
LOC_Os01g18720.1	0	0	NA
LOC_Os01g18730.1	0.24478	0.590504	1.27046
LOC_Os01g18744.1	429.695	640.203	0.575218
LOC_Os01g18760.1	0.73434	0.0986509	-2.89604
LOC_Os01g18770.1	0.190699	0.196601	0.0439758
LOC_Os01g18780.1	0	0	NA
LOC_Os01g18790.1	0	0	NA
LOC_Os01g18800.1	3535.63	3101.88	-0.188821
LOC_Os01g18810.1	13.5327	23.5599	0.799883
LOC_Os01g18830.1	1.06699	0.64509	-0.725969
LOC_Os01g18840.1	207.27	92.1176	-1.16996
LOC_Os01g18850.1	966.865	1318.26	0.447245
LOC_Os01g18860.1	485.898	982.48	1.01578
LOC_Os01g18870.1	3.67698	2.01055	-0.870933
LOC_Os01g18880.1	270.563	351.823	0.378887
LOC_Os01g18890.1	5.32798	8.55766	0.683628
LOC_Os01g18900.1	0.260464	0.179396	-0.53794
LOC_Os01g18910.1	0.381397	0	-10000
LOC_Os01g18920.1	1.2239	0.840431	-0.542284
LOC_Os01g18930.1	0	0	NA
LOC_Os01g18940.1	0	0	NA
LOC_Os01g18950.1	0.777168	0.765156	-0.0224727
LOC_Os01g18960.1	0	0	NA
LOC_Os01g18970.1	64.2833	56.5632	-0.18458
LOC_Os01g18980.1	0	0	NA
LOC_Os01g18990.1	0.190699	0	-10000
LOC_Os01g19000.1	0	0.161413	10000
LOC_Os01g19010.1	0.260464	0	-10000
LOC_Os01g19020.1	2709.44	4728.13	0.803274
LOC_Os01g19030.1	0.260464	0	-10000
LOC_Os01g19050.1	5.5884	1.50396	-1.89367
LOC_Os01g19060.1	0	0	NA
LOC_Os01g19070.1	0	0.161413	10000
LOC_Os01g19080.1	0	0	NA
LOC_Os01g19090.1	0.277806	0.866483	1.64109
LOC_Os01g19100.1	0.456494	2.39243	2.38981
LOC_Os01g19110.1	0.383683	0	-10000
LOC_Os01g19120.1	0	2.12199	10000
LOC_Os01g19130.1	638.767	1475.86	1.2082
LOC_Os01g28970.1	0.866198	19.6673	4.50496
LOC_Os01g19160.1	134.386	151.419	0.172158
LOC_Os01g19150.1	2629.78	2750.82	0.0649191
LOC_Os01g19170.1	139.791	86.7621	-0.68813
LOC_Os01g19190.1	4.98875	0.736215	-2.76048
LOC_Os01g19200.1	0.952773	0	-10000
LOC_Os01g19210.1	9.46137	1.59886	-2.565
LOC_Os01g19220.1	1113.38	1129.98	0.0213458
LOC_Os01g19230.1	0	0	NA
LOC_Os01g19240.1	1.55458	0.257358	-2.59468
LOC_Os01g19250.1	0	0	NA
LOC_Os01g19260.1	24.3454	16.2408	-0.58403
LOC_Os01g19270.1	29.9403	33.1135	0.14533
LOC_Os01g19280.1	0.138903	0.0896978	-0.630933
LOC_Os01g19290.1	0.301906	6.90461	4.51539
LOC_Os01g19300.1	0	0	NA
LOC_Os01g19310.1	0.435479	0.368545	-0.240762
LOC_Os01g19320.1	21.1282	19.0806	-0.147063
LOC_Os01g19330.1	16.1486	85.3308	2.40166
LOC_Os01g19340.1	0	0.0986509	10000
LOC_Os01g19350.1	0	0	NA
LOC_Os01g19360.1	0	0.0896978	10000
LOC_Os01g19370.1	4.39444	6.13911	0.482349
LOC_Os01g19380.1	15.8916	15.3123	-0.0535764
LOC_Os01g19390.1	50.3241	41.1498	-0.290363
LOC_Os01g19400.1	1248.05	867.37	-0.524954
LOC_Os01g19410.1	1229.69	1429.64	0.21735
LOC_Os01g19420.1	0	0	NA
LOC_Os01g19430.1	2.36573	0.358014	-2.7242
LOC_Os01g19440.1	28.864	2.50358	-3.52721
LOC_Os01g19450.1	9728.39	9705.19	-0.00344495
LOC_Os01g19460.1	76.2821	80.8219	0.0834016
LOC_Os01g19470.1	3829.14	3931.81	0.0381737
LOC_Os01g19480.1	296.146	298.504	0.0114396
LOC_Os01g19490.1	433.215	489.282	0.175583
LOC_Os01g19500.1	0.407782	1.8801	2.20494
LOC_Os01g19529.1	1.98673	1.90336	-0.0618474
LOC_Os01g19548.1	200.865	171.564	-0.227477
LOC_Os01g19570.1	0.277806	0	-10000
LOC_Os01g19580.1	0	0	NA
LOC_Os01g19590.1	0.190699	0.251111	0.397028
LOC_Os01g19600.1	0.423467	0	-10000
LOC_Os01g19610.1	102.291	21.7638	-2.23268
LOC_Os01g19620.1	0	0.358715	10000
LOC_Os01g19630.1	326.982	66.3962	-2.30004
LOC_Os01g19640.1	0	0	NA
LOC_Os01g19650.1	0	0.319449	10000
LOC_Os01g19660.1	0	0	NA
LOC_Os01g19670.1	6.51672	12.1922	0.903741
LOC_Os01g19680.1	0	0	NA
LOC_Os01g19694.1	16.1911	204.79	3.66087
LOC_Os01g19710.1	0	0	NA
LOC_Os01g19720.1	0	0	NA
LOC_Os01g19730.1	0	0	NA
LOC_Os01g19740.1	4063.28	2050.23	-0.986859
LOC_Os01g19750.1	10.3356	5.11278	-1.01544
LOC_Os01g19760.1	1011.7	1116.98	0.142822
LOC_Os01g19770.1	4.10447	6.98583	0.767237
LOC_Os01g19780.1	1.2239	0	-10000
LOC_Os01g19790.1	0	0	NA
LOC_Os01g19800.1	320.529	599.248	0.902698
LOC_Os01g19820.1	161.104	2286.31	3.82696
LOC_Os01g19830.1	0	0.257358	10000
LOC_Os01g19840.1	4952.47	3454.89	-0.519509
LOC_Os01g19850.1	50.6024	5.25582	-3.26722
LOC_Os01g19860.1	0.578055	0	-10000
LOC_Os01g19870.1	1012.66	1235.95	0.28747
LOC_Os01g19880.1	13.6883	24.9258	0.864701
LOC_Os01g19894.1	0.435479	2.07253	2.25072
LOC_Os01g19910.1	0.907657	1.24401	0.454779
LOC_Os01g19920.1	0	0	NA
LOC_Os01g19930.1	0.158796	0	-10000
LOC_Os01g19940.1	510.079	583.363	0.193674
LOC_Os01g19950.1	0	0	NA
LOC_Os01g19960.1	8.96827	12.0331	0.424109
LOC_Os01g19970.1	337.326	475.084	0.494038
LOC_Os01g19980.1	0.837892	0.295953	-1.5014
LOC_Os01g19990.1	99.16	65.5546	-0.597062
LOC_Os01g20000.1	0.190699	0.0986509	-0.950892
LOC_Os01g20010.1	0	0	NA
LOC_Os01g20020.1	0	0	NA
LOC_Os01g20030.1	0	2.56645	10000
LOC_Os01g20040.1	0.436602	0	-10000
LOC_Os01g20050.1	0	0	NA
LOC_Os01g20060.1	0	0	NA
LOC_Os01g20070.1	0	0	NA
LOC_Os01g20080.1	0	0.322826	10000
LOC_Os01g20090.1	1.39133	0.286299	-2.28087
LOC_Os01g20100.1	0	0.474648	10000
LOC_Os01g20110.1	4711.79	2704.91	-0.800693
LOC_Os01g20120.1	541.295	473.971	-0.191617
LOC_Os01g20130.1	0.158796	0	-10000
LOC_Os01g20140.1	0	0	NA
LOC_Os01g20150.1	0	0	NA
LOC_Os01g20160.1	2.585	0.251111	-3.36377
LOC_Os01g20170.1	0	0	NA
LOC_Os01g20190.1	0.80715	0.0986509	-3.03243
LOC_Os01g20200.1	0.190699	0.393202	1.04398
LOC_Os01g20204.1	0.95698	0.736289	-0.378217
LOC_Os01g20206.1	11.6107	3.24124	-1.84083
LOC_Os01g20208.1	0	0	NA
LOC_Os01g20700.1	0	0.161413	10000
LOC_Os01g20710.1	0.626177	0.812003	0.374914
LOC_Os01g20720.1	7.14754	16.2494	1.18486
LOC_Os01g20730.1	351.918	423.505	0.267142
LOC_Os01g20740.1	1.32808	1.37006	0.0448945
LOC_Os01g20750.1	0	0	NA
LOC_Os01g20760.1	0.138903	0	-10000
LOC_Os01g20770.1	0.48956	0	-10000
LOC_Os01g20780.1	422.569	657.715	0.638276
LOC_Os01g20800.1	0.24478	0.695446	1.50645
LOC_Os01g20810.1	0.24478	0	-10000
LOC_Os01g20820.1	50.7905	109.586	1.10944
LOC_Os01g20830.1	98.3854	37.5669	-1.38898
LOC_Os01g20840.1	1170.35	1190.66	0.0248291
LOC_Os01g20850.1	3.53591	2.98382	-0.244918
LOC_Os01g20860.1	502.69	544.788	0.116026
LOC_Os01g20870.1	0	0	NA
LOC_Os01g20880.1	216.346	127.319	-0.764899
LOC_Os01g20890.1	1526.79	1689.76	0.14632
LOC_Os01g20894.1	41.0843	18.4149	-1.15772
LOC_Os01g20900.1	739.808	805.137	0.122083
LOC_Os01g20910.1	46.2939	26.1727	-0.822757
LOC_Os01g20920.1	1.29195	1.5201	0.234613
LOC_Os01g20930.1	42.8356	31.6994	-0.434356
LOC_Os01g20940.1	1096.31	1010.91	-0.11701
LOC_Os01g20950.1	5.96	13.0651	1.13233
LOC_Os01g20960.1	0	0	NA
LOC_Os01g20970.1	0	0.55261	10000
LOC_Os01g20980.1	17.9772	412.422	4.51988
LOC_Os01g20990.1	0	0	NA
LOC_Os01g21000.1	0	0	NA
LOC_Os01g21010.1	0	0.257358	10000
LOC_Os01g21020.1	0	0	NA
LOC_Os01g21034.1	1822.41	2052.7	0.171673
LOC_Os01g21050.1	1.76826	4.43308	1.32598
LOC_Os01g21060.1	0	0.161413	10000
LOC_Os01g21070.1	369.108	353.488	-0.0623807
LOC_Os01g21080.1	0	0	NA
LOC_Os01g21090.1	1.23958	0.0986509	-3.65138
LOC_Os01g21100.1	2.35604	2.15742	-0.127059
LOC_Os01g21110.1	0	0	NA
LOC_Os01g21120.1	566.065	12468.1	4.46113
LOC_Os01g21130.1	75.0333	30.1851	-1.3137
LOC_Os01g21135.1	12.1253	8.10962	-0.58032
LOC_Os01g21144.1	85.9033	96.6064	0.169405
LOC_Os01g21160.1	906.679	989.266	0.125767
LOC_Os01g21170.1	33.1625	40.6592	0.294028
LOC_Os01g21180.1	2141.49	1663.07	-0.364764
LOC_Os01g21190.1	1.82325	1.53141	-0.251655
LOC_Os01g21200.1	0	0	NA
LOC_Os01g21210.1	0.383683	0	-10000
LOC_Os01g21220.1	0	0	NA
LOC_Os01g21240.1	56.874	92.6713	0.704354
LOC_Os01g21250.1	178.077	234.777	0.398792
LOC_Os01g21260.1	0	0.257358	10000
LOC_Os01g21270.1	0	0.221499	10000
LOC_Os01g21290.1	0	0	NA
LOC_Os01g21300.1	101.503	31.2993	-1.69731
LOC_Os01g21310.1	466.546	161.147	-1.53365
LOC_Os01g21320.1	2123.19	2312.12	0.122981
LOC_Os01g21340.1	0	0	NA
LOC_Os01g21350.1	0	0	NA
LOC_Os01g21360.1	0	0	NA
LOC_Os01g21380.1	1.18967	1.22136	0.0379268
LOC_Os01g21390.1	0	0.161413	10000
LOC_Os01g21400.1	0	0	NA
LOC_Os01g21410.1	457.315	427.527	-0.0971704
LOC_Os01g21420.1	133.3	70.8609	-0.91161
LOC_Os01g21430.1	0	0	NA
LOC_Os01g21440.1	2785.43	2240.5	-0.314081
LOC_Os01g21450.1	1662.63	1612.89	-0.0438189
LOC_Os01g21480.1	0	0	NA
LOC_Os01g21490.1	1.51059	0	-10000
LOC_Os01g21500.1	0.277806	0	-10000
LOC_Os01g21510.1	0.399367	0.894923	1.16405
LOC_Os01g21520.1	8.81291	13.5684	0.622556
LOC_Os01g21530.1	3.57673	5.79238	0.695514
LOC_Os01g21536.1	0.277806	0.260064	-0.0952135
LOC_Os01g21542.1	1.04186	0.716028	-0.54107
LOC_Os01g21550.1	0	0	NA
LOC_Os01g21560.1	724.979	576.165	-0.331459
LOC_Os01g21580.1	1.00571	0.260064	-1.95128
LOC_Os01g21585.1	0.163003	0.212546	0.382881
LOC_Os01g21590.1	61.2836	845.085	3.78552
LOC_Os01g21600.1	0.297699	0	-10000
LOC_Os01g21610.1	322.449	377.486	0.227356
LOC_Os01g21620.1	20.1785	13.278	-0.603774
LOC_Os01g21630.1	400.844	34.9421	-3.52
LOC_Os01g21640.1	0.326005	0	-10000
LOC_Os01g21650.1	1.35943	0.447712	-1.60236
LOC_Os01g21660.1	5.9259	9.1403	0.625207
LOC_Os01g21670.1	0	0	NA
LOC_Os01g21680.1	0	0	NA
LOC_Os01g21690.1	0	0	NA
LOC_Os01g21700.1	0	0	NA
LOC_Os01g21710.1	0	0	NA
LOC_Os01g21720.1	0	0	NA
LOC_Os01g21730.1	0	0	NA
LOC_Os01g21740.1	0	0.627885	10000
LOC_Os01g21750.1	0	0	NA
LOC_Os01g21760.1	0	0.286299	10000
LOC_Os01g21780.1	0.158796	0.425092	1.42061
LOC_Os01g21790.1	0.260464	0	-10000
LOC_Os01g21800.1	0	0	NA
LOC_Os01g21810.1	0	0	NA
LOC_Os01g21820.1	3937.23	2900.45	-0.440904
LOC_Os01g21830.1	0	0	NA
LOC_Os01g21840.1	0	0.196601	10000
LOC_Os01g21850.1	1022.94	1099.52	0.104148
LOC_Os01g21860.1	467.567	403.722	-0.211811
LOC_Os01g21870.1	0.451163	0.884495	0.971206
LOC_Os01g21880.1	1.76777	5.04333	1.51245
LOC_Os01g21900.1	8.73296	9.82752	0.170357
LOC_Os01g21920.1	0	0.0986509	10000
LOC_Os01g21930.1	0	0	NA
LOC_Os01g21940.1	1059.24	812.234	-0.383055
LOC_Os01g21950.1	0	0	NA
LOC_Os01g21960.1	1891.51	1519.18	-0.316249
LOC_Os01g21970.1	68.4217	24.344	-1.49089
LOC_Os01g21980.1	0	0	NA
LOC_Os01g21990.1	433.705	210.962	-1.03973
LOC_Os01g22000.1	34.2229	20.896	-0.711735
LOC_Os01g22010.1	20261.8	19028.7	-0.0905886
LOC_Os01g22030.1	0	0	NA
LOC_Os01g22039.1	1.44122	0.508469	-1.50306
LOC_Os01g22050.1	2.68609	0.65822	-2.02886
LOC_Os01g22070.1	282.538	295.941	0.0668645
LOC_Os01g22080.1	2.00356	0.483601	-2.05068
LOC_Os01g22090.1	208.192	271.064	0.380714
LOC_Os01g22100.1	4.42794	6.99941	0.660598
LOC_Os01g22110.1	0	0	NA
LOC_Os01g22120.1	0	0	NA
LOC_Os01g22140.1	1.12474	0.982786	-0.194644
LOC_Os01g22150.1	0.721166	0.491393	-0.553455
LOC_Os01g22170.1	1.19755	0.302244	-1.9863
LOC_Os01g22180.1	0	0	NA
LOC_Os01g22190.1	0.648355	0.335394	-0.950926
LOC_Os01g22200.1	0.787258	0.269093	-1.54873
LOC_Os01g22209.1	1.35945	0.480862	-1.49933
LOC_Os01g22220.1	7.68917	7.17164	-0.100525
LOC_Os01g22230.1	927.657	1072.12	0.208801
LOC_Os01g22249.1	47.9624	4327.41	6.49546
LOC_Os01g22270.1	0	0	NA
LOC_Os01g22280.1	0	0	NA
LOC_Os01g22309.1	0	0.0986509	10000
LOC_Os01g22300.1	0	0	NA
LOC_Os01g22320.1	1.01353	0.93756	-0.112412
LOC_Os01g22336.1	47.8473	93.7938	0.971055
LOC_Os01g22352.1	228.162	189.083	-0.271035
LOC_Os01g22370.1	1326.87	2305.61	0.797123
LOC_Os01g22380.1	630.339	513.358	-0.296165
LOC_Os01g22390.1	633.374	795.771	0.329296
LOC_Os01g22410.1	0	0.122848	10000
LOC_Os01g22420.1	0	0	NA
LOC_Os01g22430.1	180.475	164.869	-0.130477
LOC_Os01g22440.1	7.07219	6.60983	-0.0975445
LOC_Os01g22450.1	20.9191	57.1	1.44867
LOC_Os01g22480.1	215.993	191.521	-0.173487
LOC_Os01g22490.1	10928.5	7882.52	-0.471363
LOC_Os01g22500.1	859.129	734.426	-0.226259
LOC_Os01g22510.1	832.802	770.027	-0.113065
LOC_Os01g22520.1	4664.35	3508.19	-0.410949
LOC_Os01g22530.1	0	0	NA
LOC_Os01g22540.1	0.575505	0.287	-1.00378
LOC_Os01g22550.1	332.614	374.586	0.171449
LOC_Os01g22560.1	128.485	14.0163	-3.19642
LOC_Os01g22570.1	51.6174	3.3685	-3.93768
LOC_Os01g22590.1	3.99729	15.0733	1.9149
LOC_Os01g22600.1	560.146	361.388	-0.632254
LOC_Os01g22620.1	0.138903	0.514716	1.8897
LOC_Os01g22630.1	793.462	861.828	0.119239
LOC_Os01g22640.1	1637	464.386	-1.81766
LOC_Os01g22650.1	0	0	NA
LOC_Os01g22660.1	1422.29	1485.1	0.0623376
LOC_Os01g22670.1	5.12868	14.3487	1.48426
LOC_Os01g22680.1	0	0.286299	10000
LOC_Os01g22700.1	0	0	NA
LOC_Os01g22710.1	11.18	60.2462	2.42995
LOC_Os01g22720.1	0	0	NA
LOC_Os01g22730.1	0	0	NA
LOC_Os01g22740.1	0	0	NA
LOC_Os01g22750.1	0	0	NA
LOC_Os01g22760.1	0	0	NA
LOC_Os01g22770.1	0	0	NA
LOC_Os01g22780.1	56.9003	23.3516	-1.28492
LOC_Os01g22794.1	3.87012	2.27163	-0.768649
LOC_Os01g22810.1	0	0	NA
LOC_Os01g22820.1	0	0	NA
LOC_Os01g22830.1	0.158796	0	-10000
LOC_Os01g22840.1	0	0	NA
LOC_Os01g22850.1	0	0	NA
LOC_Os01g22860.1	0	0	NA
LOC_Os01g22870.1	862.61	792.087	-0.123049
LOC_Os01g22880.1	0	0.188349	10000
LOC_Os01g22890.1	0.158796	0	-10000
LOC_Os01g22900.1	2382.69	1823.49	-0.385891
LOC_Os01g22910.1	9.2942	8.44293	-0.138587
LOC_Os01g22920.1	0	0	NA
LOC_Os01g22930.1	1.91523	1.4591	-0.392438
LOC_Os01g22954.1	123.443	193.072	0.645295
LOC_Os01g22980.1	380.064	123.424	-1.62261
LOC_Os01g22990.1	5252.27	3761.12	-0.481779
LOC_Os01g23000.1	0	0.687994	10000
LOC_Os01g23010.1	0.158796	0.196601	0.3081
LOC_Os01g23020.1	0	0	NA
LOC_Os01g23040.1	0.158796	0	-10000
LOC_Os01g23050.1	0.297699	0.188349	-0.660446
LOC_Os01g23060.1	0	0	NA
LOC_Os01g23070.1	26.7566	24.0473	-0.154018
LOC_Os01g23080.1	0	0	NA
LOC_Os01g23090.1	0	0.257358	10000
LOC_Os01g23100.1	0	0.0896978	10000
LOC_Os01g23110.1	0.158796	0.122848	-0.370293
LOC_Os01g23120.1	0	0	NA
LOC_Os01g23130.1	0.383683	0.122848	-1.64304
LOC_Os01g23144.1	0	0	NA
LOC_Os01g23160.1	0.138903	0	-10000
LOC_Os01g23180.1	0.163003	0	-10000
LOC_Os01g23190.1	0.158796	0.436754	1.45965
LOC_Os01g23200.1	0.158796	0.885967	2.48008
LOC_Os01g23210.1	1.42916	2.05527	0.524161
LOC_Os01g23230.1	0.932881	0	-10000
LOC_Os01g23239.1	0.297699	0.375997	0.336868
LOC_Os01g23260.1	0	0	NA
LOC_Os01g23270.1	0	0	NA
LOC_Os01g23280.1	0	0	NA
LOC_Os01g23290.1	0	0	NA
LOC_Os01g23300.1	0	0	NA
LOC_Os01g23310.1	1.04717	0.516751	-1.01896
LOC_Os01g23320.1	0.297699	0	-10000
LOC_Os01g23330.1	3.96097	1.40964	-1.49053
LOC_Os01g23340.1	0	0.0896978	10000
LOC_Os01g23350.1	0	0	NA
LOC_Os01g23360.1	0	0	NA
LOC_Os01g23370.1	1.17094	0.490593	-1.25507
LOC_Os01g23380.1	273.778	385.821	0.494924
LOC_Os01g23390.1	0	0	NA
LOC_Os01g23400.1	0	0	NA
LOC_Os01g23410.1	1.30701	1.94289	0.571935
LOC_Os01g23420.1	0.558163	0.260064	-1.10182
LOC_Os01g23430.1	9.38137	37.6242	2.00379
LOC_Os01g23440.1	4.71038	3.76222	-0.324259
LOC_Os01g23460.1	3.23547	4.63219	0.51772
LOC_Os01g23470.1	0	0	NA
LOC_Os01g23480.1	0	0	NA
[truncated: 53,803 more rows]
